# Supplementary material for: The T Cell Receptor Immune Repertoire Protects the Liver From Reconsitution
Source: Front Immunol. 2020 Dec 18;11:584979. doi: 10.3389/fimmu.2020.584979 (PMC7775400; doi:10.3389/fimmu.2020.584979)
Supplement: Supplementary file 2 [file Table_1.xlsx]

## Sheet: Celltype marker
	p_val	avg_logFC	pct.1	pct.2	p_val_adj	cluster	gene
Cd3d	0	1.63789	0.805	0.104	0	T cells	Cd3d
Cd3e	0	1.59927	0.831	0.103	0	T cells	Cd3e
Cd8b1	0	1.52875	0.415	0.037	0	T cells	Cd8b1
Lat	0	1.51109	0.769	0.128	0	T cells	Lat
Trbc2	0	1.41987	0.79	0.157	0	T cells	Trbc2
Cd3g	0	1.3878	0.764	0.106	0	T cells	Cd3g
Cd28	0	1.32085	0.571	0.08	0	T cells	Cd28
Trac	0	1.22996	0.534	0.06	0	T cells	Trac
Thy1	0	1.19876	0.557	0.099	0	T cells	Thy1
Tcf7	0	1.17529	0.472	0.051	0	T cells	Tcf7
Il7r	0	1.13764	0.465	0.055	0	T cells	Il7r
Trbv1	0	1.05967	0.108	0.009	0	T cells	Trbv1
Cd8a	0	1.04479	0.346	0.052	0	T cells	Cd8a
Ms4a4b	0	1.03442	0.611	0.162	0	T cells	Ms4a4b
Itk	0	1.0187	0.537	0.099	0	T cells	Itk
Igfbp4	0	1.00731	0.215	0.018	0	T cells	Igfbp4
Bcl11b	0	1.00287	0.417	0.044	0	T cells	Bcl11b
Lef1	0	0.989758	0.384	0.043	0	T cells	Lef1
Emb	0	0.987343	0.547	0.149	0	T cells	Emb
Ms4a6b	0	0.97816	0.556	0.126	0	T cells	Ms4a6b
Dusp10	0	0.880354	0.363	0.082	0	T cells	Dusp10
Lck	0	0.878598	0.678	0.199	0	T cells	Lck
Ctla4	0	0.866138	0.219	0.037	0	T cells	Ctla4
Hcst	0	0.8614	0.778	0.337	0	T cells	Hcst
Skap1	0	0.841497	0.531	0.125	0	T cells	Skap1
Cd6	0	0.838544	0.305	0.021	0	T cells	Cd6
Saraf	0	0.798945	0.602	0.206	0	T cells	Saraf
Cd247	0	0.781009	0.415	0.081	0	T cells	Cd247
Klk8	0	0.759424	0.356	0.046	0	T cells	Klk8
Trbc1	0	0.748742	0.374	0.116	0	T cells	Trbc1
Icos	0	0.744842	0.229	0.024	0	T cells	Icos
Rgs10	0	0.727396	0.349	0.076	0	T cells	Rgs10
Cd5	0	0.706307	0.246	0.017	0	T cells	Cd5
Rora	0	0.687122	0.195	0.049	0	T cells	Rora
Cxcr6	0	0.683277	0.215	0.04	0	T cells	Cxcr6
Gramd3	0	0.668557	0.371	0.115	0	T cells	Gramd3
Rplp0	0	0.617841	0.963	0.915	0	T cells	Rplp0
Zap70	0	0.583679	0.313	0.084	0	T cells	Zap70
Leprotl1	0	0.579554	0.461	0.173	0	T cells	Leprotl1
Chd3	0	0.578018	0.521	0.233	0	T cells	Chd3
Actn1	0	0.576781	0.245	0.039	0	T cells	Actn1
H2-Q7	0	0.576675	0.773	0.47	0	T cells	H2-Q7
Dapl1	0	0.576203	0.151	0.008	0	T cells	Dapl1
Rgcc	0	0.560897	0.328	0.127	0	T cells	Rgcc
Tmsb10	0	0.559187	0.984	0.924	0	T cells	Tmsb10
Gtf2i	0	0.555176	0.319	0.091	0	T cells	Gtf2i
Prkcq	0	0.552284	0.277	0.056	0	T cells	Prkcq
Gimap3	0	0.551159	0.588	0.295	0	T cells	Gimap3
Fyb	0	0.546742	0.52	0.203	0	T cells	Fyb
Izumo1r	0	0.54153	0.134	0.011	0	T cells	Izumo1r
Rplp1	0	0.529812	0.995	0.98	0	T cells	Rplp1
Cd27	0	0.527161	0.232	0.038	0	T cells	Cd27
Sh2d2a	0	0.515294	0.4	0.17	0	T cells	Sh2d2a
Dgka	0	0.509584	0.36	0.126	0	T cells	Dgka
Kcnn4	0	0.509403	0.215	0.056	0	T cells	Kcnn4
Cd4	0	0.507533	0.163	0.023	0	T cells	Cd4
Smc4	0	0.497181	0.317	0.126	0	T cells	Smc4
Rpl12	0	0.496005	0.932	0.846	0	T cells	Rpl12
Nsg2	0	0.494402	0.176	0.015	0	T cells	Nsg2
Fam189b	0	0.489102	0.281	0.07	0	T cells	Fam189b
Arl4c	0	0.486399	0.362	0.136	0	T cells	Arl4c
Grap2	0	0.476446	0.323	0.115	0	T cells	Grap2
Themis	0	0.474409	0.169	0.011	0	T cells	Themis
Atp1b3	0	0.474216	0.528	0.266	0	T cells	Atp1b3
Tox	0	0.468857	0.153	0.031	0	T cells	Tox
Gimap6	0	0.467383	0.742	0.5	0	T cells	Gimap6
Rflnb	0	0.464805	0.258	0.081	0	T cells	Rflnb
Prkch	0	0.460715	0.343	0.123	0	T cells	Prkch
Tnfaip3	0	0.460154	0.857	0.542	0	T cells	Tnfaip3
Rinl	0	0.455305	0.302	0.102	0	T cells	Rinl
Ccnd2	0	0.45432	0.424	0.186	0	T cells	Ccnd2
Lcp2	0	0.447739	0.277	0.095	0	T cells	Lcp2
Fxyd5	0	0.447669	0.786	0.473	0	T cells	Fxyd5
Eef1b2	0	0.446077	0.899	0.803	0	T cells	Eef1b2
Npc2	0	0.443909	0.68	0.393	0	T cells	Npc2
Npm1	0	0.435381	0.792	0.62	0	T cells	Npm1
Sh2d1a	0	0.428999	0.225	0.056	0	T cells	Sh2d1a
Tdrp	0	0.421511	0.139	0.008	0	T cells	Tdrp
Kbtbd11	0	0.413845	0.202	0.047	0	T cells	Kbtbd11
Cd40lg	0	0.409652	0.121	0.011	0	T cells	Cd40lg
Sidt1	0	0.403257	0.174	0.034	0	T cells	Sidt1
Ptpn18	0	0.399878	0.803	0.618	0	T cells	Ptpn18
Tpt1	0	0.386789	0.994	0.985	0	T cells	Tpt1
Sit1	0	0.379018	0.159	0.026	0	T cells	Sit1
Rps23	0	0.370888	0.979	0.946	0	T cells	Rps23
Rpsa	0	0.363892	0.992	0.971	0	T cells	Rpsa
Rps16	0	0.36239	0.987	0.969	0	T cells	Rps16
Rpl3	0	0.360317	0.931	0.872	0	T cells	Rpl3
Tesc	0	0.358517	0.15	0.026	0	T cells	Tesc
Rps15a	0	0.357268	0.984	0.956	0	T cells	Rps15a
Rpl13a	0	0.35524	0.95	0.882	0	T cells	Rpl13a
Trat1	0	0.354822	0.125	0.016	0	T cells	Trat1
Hspa8	0	0.352549	0.87	0.709	0	T cells	Hspa8
Als2cl	0	0.351832	0.116	0.008	0	T cells	Als2cl
Rps2	0	0.351594	0.954	0.91	0	T cells	Rps2
Camk4	0	0.348784	0.127	0.017	0	T cells	Camk4
Rps18	0	0.343459	0.945	0.896	0	T cells	Rps18
Rps14	0	0.340455	0.974	0.939	0	T cells	Rps14
Rps6	0	0.337003	0.918	0.843	0	T cells	Rps6
Rps7	0	0.332141	0.981	0.952	0	T cells	Rps7
Rps3	0	0.330817	0.945	0.894	0	T cells	Rps3
Nkg7	0	0.325344	0.543	0.248	0	T cells	Nkg7
Selplg	0	0.325262	0.652	0.356	0	T cells	Selplg
Rpl19	0	0.32394	0.966	0.931	0	T cells	Rpl19
Gstp3	0	0.320599	0.121	0.01	0	T cells	Gstp3
Rplp2	0	0.310896	0.992	0.98	0	T cells	Rplp2
Eef1a1	0	0.310381	0.993	0.977	0	T cells	Eef1a1
Rpl18	0	0.303869	0.97	0.939	0	T cells	Rpl18
Rpl32	0	0.302272	0.963	0.923	0	T cells	Rpl32
Rps10	0	0.301722	0.972	0.945	0	T cells	Rps10
Uba52	0	0.284359	0.982	0.958	0	T cells	Uba52
Rpl11	0	0.283326	0.953	0.908	0	T cells	Rpl11
Rpl39	0	0.270971	0.991	0.975	0	T cells	Rpl39
Rps24	0	0.262427	0.994	0.981	0	T cells	Rps24
Rpl23	0	0.259955	0.992	0.98	0	T cells	Rpl23
Rps13	0	0.254964	0.979	0.947	0	T cells	Rps13
Ptma	0	-0.356029	0.932	0.94	0	T cells	Ptma
Klf2	0	-0.545328	0.775	0.846	0	T cells	Klf2
Tsc22d3	0	-0.548882	0.748	0.817	0	T cells	Tsc22d3
Gm15987	0	-0.554756	0.009	0.168	0	T cells	Gm15987
Plcg2	0	-0.593808	0.008	0.182	0	T cells	Plcg2
Rnase6	0	-0.619083	0.003	0.167	0	T cells	Rnase6
Bcl11a	0	-0.619978	0.003	0.164	0	T cells	Bcl11a
Cd81	0	-0.62015	0.024	0.199	0	T cells	Cd81
Lmo2	0	-0.630359	0.004	0.174	0	T cells	Lmo2
Dok3	0	-0.645432	0.003	0.18	0	T cells	Dok3
Aldh2	0	-0.646399	0.012	0.205	0	T cells	Aldh2
Wdfy4	0	-0.65503	0.003	0.172	0	T cells	Wdfy4
Lat2	0	-0.664814	0.021	0.229	0	T cells	Lat2
Fam43a	0	-0.700831	0.008	0.182	0	T cells	Fam43a
Fth1	0	-0.702127	0.947	0.97	0	T cells	Fth1
Spi1	0	-0.704029	0.006	0.184	0	T cells	Spi1
Swap70	0	-0.714766	0.016	0.209	0	T cells	Swap70
Prkcb	0	-0.716292	0.145	0.351	0	T cells	Prkcb
Tnfrsf13c	0	-0.717532	0.007	0.176	0	T cells	Tnfrsf13c
Iglc1	0	-0.718274	0.008	0.164	0	T cells	Iglc1
Pld4	0	-0.735566	0.006	0.182	0	T cells	Pld4
Ncf2	0	-0.742198	0.009	0.197	0	T cells	Ncf2
Plek	0	-0.742588	0.064	0.264	0	T cells	Plek
Sdc4	0	-0.759468	0.014	0.177	0	T cells	Sdc4
Foxp1	0	-0.762357	0.423	0.605	0	T cells	Foxp1
Cyp4f18	0	-0.772658	0.003	0.181	0	T cells	Cyp4f18
Cd22	0	-0.783815	0.003	0.208	0	T cells	Cd22
Rhob	0	-0.785708	0.203	0.452	0	T cells	Rhob
Pou2f2	0	-0.787927	0.101	0.33	0	T cells	Pou2f2
Serinc3	0	-0.788778	0.251	0.539	0	T cells	Serinc3
Rel	0	-0.801774	0.166	0.408	0	T cells	Rel
Snn	0	-0.807651	0.008	0.22	0	T cells	Snn
Siglecg	0	-0.813999	0.003	0.219	0	T cells	Siglecg
Ctsz	0	-0.815719	0.085	0.318	0	T cells	Ctsz
Blk	0	-0.824832	0.01	0.235	0	T cells	Blk
Inpp5d	0	-0.848783	0.203	0.47	0	T cells	Inpp5d
B3gnt5	0	-0.852063	0.025	0.236	0	T cells	B3gnt5
Ly6e	0	-0.856605	0.63	0.756	0	T cells	Ly6e
Cd37	0	-0.869595	0.431	0.604	0	T cells	Cd37
Fcrla	0	-0.891544	0.002	0.242	0	T cells	Fcrla
Pax5	0	-0.893392	0.004	0.224	0	T cells	Pax5
Cd55	0	-0.901285	0.121	0.336	0	T cells	Cd55
Gm30211	0	-0.90566	0.006	0.196	0	T cells	Gm30211
Vpreb3	0	-0.918077	0.003	0.212	0	T cells	Vpreb3
Hvcn1	0	-0.936364	0.059	0.298	0	T cells	Hvcn1
Lyn	0	-0.938996	0.011	0.297	0	T cells	Lyn
Blnk	0	-0.968733	0.005	0.259	0	T cells	Blnk
Irs2	0	-0.980766	0.171	0.402	0	T cells	Irs2
Pkig	0	-0.985495	0.013	0.302	0	T cells	Pkig
H3f3a	0	-0.996276	0.74	0.855	0	T cells	H3f3a
Tcf4	0	-1.02517	0.013	0.22	0	T cells	Tcf4
H2-DMb1	0	-1.04861	0.005	0.295	0	T cells	H2-DMb1
Ctsh	0	-1.06472	0.01	0.324	0	T cells	Ctsh
Ralgps2	0	-1.06694	0.102	0.389	0	T cells	Ralgps2
Serp1	0	-1.07861	0.272	0.604	0	T cells	Serp1
Cst3	0	-1.08194	0.247	0.447	0	T cells	Cst3
H2-Oa	0	-1.09115	0.026	0.323	0	T cells	H2-Oa
Ctss	0	-1.09298	0.209	0.473	0	T cells	Ctss
Mzb1	0	-1.10026	0.01	0.296	0	T cells	Mzb1
Fcer2a	0	-1.11508	0.004	0.277	0	T cells	Fcer2a
Ly86	0	-1.1477	0.008	0.356	0	T cells	Ly86
Plaur	0	-1.14948	0.04	0.346	0	T cells	Plaur
Cybb	0	-1.19406	0.014	0.275	0	T cells	Cybb
Apoe	0	-1.19749	0.025	0.212	0	T cells	Apoe
Cd24a	0	-1.20429	0.013	0.317	0	T cells	Cd24a
Cd19	0	-1.24799	0.004	0.347	0	T cells	Cd19
Unc93b1	0	-1.2499	0.035	0.429	0	T cells	Unc93b1
Bank1	0	-1.26791	0.008	0.349	0	T cells	Bank1
Scd1	0	-1.3969	0.005	0.333	0	T cells	Scd1
H2-Ob	0	-1.4307	0.029	0.412	0	T cells	H2-Ob
Ms4a1	0	-1.43544	0.007	0.386	0	T cells	Ms4a1
Napsa	0	-1.47811	0.017	0.476	0	T cells	Napsa
H2-DMa	0	-1.48296	0.084	0.527	0	T cells	H2-DMa
Fcmr	0	-1.49166	0.002	0.377	0	T cells	Fcmr
Iglc3	0	-1.59123	0.011	0.394	0	T cells	Iglc3
Irf8	0	-1.65009	0.045	0.491	0	T cells	Irf8
Cd83	0	-1.65508	0.024	0.463	0	T cells	Cd83
Syk	0	-1.66278	0.01	0.517	0	T cells	Syk
Mef2c	0	-1.71715	0.014	0.505	0	T cells	Mef2c
Ighd	0	-1.72725	0.012	0.448	0	T cells	Ighd
H2-DMb2	0	-1.83926	0.009	0.493	0	T cells	H2-DMb2
Cd79b	0	-1.90604	0.031	0.495	0	T cells	Cd79b
Fcer1g	0	-2.05614	0.049	0.342	0	T cells	Fcer1g
Ighm	0	-2.09362	0.18	0.665	0	T cells	Ighm
Ly6d	0	-2.23498	0.017	0.487	0	T cells	Ly6d
Ebf1	0	-2.25148	0.008	0.567	0	T cells	Ebf1
Iglc2	0	-2.30124	0.021	0.514	0	T cells	Iglc2
Tyrobp	0	-2.41481	0.047	0.398	0	T cells	Tyrobp
Igkc	0	-2.42316	0.093	0.625	0	T cells	Igkc
Cd79a	0	-3.0095	0.034	0.636	0	T cells	Cd79a
H2-Ab1	0	-3.01027	0.044	0.705	0	T cells	H2-Ab1
H2-Eb1	0	-3.05779	0.051	0.686	0	T cells	H2-Eb1
H2-Aa	0	-3.38358	0.066	0.717	0	T cells	H2-Aa
Cd74	0	-4.18787	0.191	0.778	0	T cells	Cd74
Litaf	1.2868e-306	-0.73486	0.08	0.275	1.27406e-302	T cells	Litaf
Atf3	5.31153e-306	-0.957863	0.07	0.26	5.25895e-302	T cells	Atf3
Rpl14	7.4159e-306	0.346839	0.897	0.826	7.34248e-302	T cells	Rpl14
Spib	2.31563e-305	-0.606096	0.002	0.15	2.29271e-301	T cells	Spib
Rps5	4.05111e-305	0.292993	0.968	0.935	4.011e-301	T cells	Rps5
Nrros	8.48325e-305	-0.750553	0.069	0.257	8.39927e-301	T cells	Nrros
Snx5	4.09175e-303	-0.70157	0.266	0.459	4.05124e-299	T cells	Snx5
Utrn	1.49091e-302	0.408922	0.229	0.073	1.47615e-298	T cells	Utrn
Rpl5	2.16931e-302	0.337173	0.946	0.881	2.14783e-298	T cells	Rpl5
Rps4x	6.69238e-301	0.292701	0.975	0.946	6.62612e-297	T cells	Rps4x
Cd96	1.00641e-300	0.353758	0.163	0.037	9.96443e-297	T cells	Cd96
Srpk1	1.91591e-300	0.387557	0.284	0.106	1.89694e-296	T cells	Srpk1
Gata3	1.12099e-299	0.465716	0.181	0.046	1.10989e-295	T cells	Gata3
Plcg1	1.3614e-298	0.349163	0.147	0.03	1.34792e-294	T cells	Plcg1
Smim14	1.71342e-297	-0.668324	0.171	0.365	1.69645e-293	T cells	Smim14
Cerk	1.39959e-296	-0.664693	0.046	0.221	1.38573e-292	T cells	Cerk
Gm2682	9.15023e-296	0.324543	0.183	0.047	9.05965e-292	T cells	Gm2682
Fam78a	2.59578e-294	0.320532	0.147	0.03	2.57009e-290	T cells	Fam78a
Cd180	6.6053e-293	-0.581242	0.002	0.145	6.53991e-289	T cells	Cd180
Ipcef1	1.66311e-292	0.372424	0.176	0.045	1.64664e-288	T cells	Ipcef1
Ptp4a3	2.16785e-288	-0.677406	0.2	0.389	2.14638e-284	T cells	Ptp4a3
Plekho1	4.95388e-288	-0.576147	0.024	0.184	4.90483e-284	T cells	Plekho1
Prdx6	5.02611e-288	0.4138	0.53	0.298	4.97635e-284	T cells	Prdx6
Gzmk	3.26384e-287	0.541355	0.113	0.016	3.23153e-283	T cells	Gzmk
Dnajc15	5.71235e-287	0.439779	0.365	0.169	5.65579e-283	T cells	Dnajc15
Irf4	1.26783e-286	-0.87929	0.039	0.208	1.25528e-282	T cells	Irf4
Rnf138	2.21377e-285	0.39795	0.358	0.161	2.19185e-281	T cells	Rnf138
Gns	1.8227e-283	-0.661235	0.048	0.22	1.80466e-279	T cells	Gns
Zgpat	1.34386e-282	0.38624	0.297	0.119	1.33055e-278	T cells	Zgpat
Bri3	2.58415e-282	-0.683851	0.212	0.399	2.55857e-278	T cells	Bri3
Pde4d	2.75614e-281	0.36086	0.136	0.026	2.72885e-277	T cells	Pde4d
Rpl24	1.57849e-279	0.270542	0.936	0.876	1.56287e-275	T cells	Rpl24
Tpd52	2.5764e-279	-0.673206	0.033	0.193	2.55089e-275	T cells	Tpd52
Zc3hav1	7.72562e-278	0.479395	0.495	0.268	7.64914e-274	T cells	Zc3hav1
Txk	1.68193e-275	0.316834	0.331	0.137	1.66528e-271	T cells	Txk
Stk17b	3.22863e-275	-0.46826	0.739	0.802	3.19666e-271	T cells	Stk17b
Snx9	2.34817e-272	-0.555568	0.023	0.174	2.32492e-268	T cells	Snx9
Rps11	3.67962e-272	0.255485	0.967	0.936	3.6432e-268	T cells	Rps11
Plac8	2.32431e-271	-1.04145	0.3	0.47	2.3013e-267	T cells	Plac8
Serpinb1a	1.05412e-269	-0.573264	0.017	0.164	1.04369e-265	T cells	Serpinb1a
Ftl1	3.08139e-269	-0.480335	0.846	0.882	3.05088e-265	T cells	Ftl1
Ass1	2.0483e-268	0.383368	0.2	0.062	2.02802e-264	T cells	Ass1
Fcgr2b	3.48755e-267	-0.5078	0.01	0.149	3.45302e-263	T cells	Fcgr2b
Psme2	3.79253e-267	0.392726	0.58	0.354	3.75498e-263	T cells	Psme2
Rpl36a	8.64205e-267	0.302082	0.949	0.904	8.55649e-263	T cells	Rpl36a
Gimap4	1.69271e-266	0.41967	0.521	0.294	1.67595e-262	T cells	Gimap4
Snx8	2.39588e-264	-0.587791	0.003	0.135	2.37216e-260	T cells	Snx8
Rpl22l1	8.51481e-263	0.3296	0.857	0.731	8.43051e-259	T cells	Rpl22l1
Znrf1	3.296e-261	0.355551	0.182	0.053	3.26337e-257	T cells	Znrf1
Bcl2	1.97644e-260	0.428654	0.426	0.219	1.95688e-256	T cells	Bcl2
Pou2af1	2.32121e-260	-0.52272	0.006	0.14	2.29823e-256	T cells	Pou2af1
Inpp4b	4.77802e-259	0.39064	0.207	0.067	4.73072e-255	T cells	Inpp4b
Actn2	1.88685e-256	0.324172	0.113	0.019	1.86817e-252	T cells	Actn2
H2-K1	1.16503e-254	0.317445	0.969	0.892	1.1535e-250	T cells	H2-K1
Ncf1	9.21918e-254	-0.556413	0.019	0.16	9.12791e-250	T cells	Ncf1
Ehd3	6.33645e-253	0.302349	0.129	0.027	6.27372e-249	T cells	Ehd3
Chst3	1.03012e-252	-0.578458	0.003	0.13	1.01993e-248	T cells	Chst3
Fgd2	1.0761e-252	-0.514529	0.002	0.128	1.06545e-248	T cells	Fgd2
Mgst2	2.6157e-252	0.309244	0.164	0.044	2.58981e-248	T cells	Mgst2
Capg	3.77044e-252	-0.493663	0.091	0.272	3.73311e-248	T cells	Capg
Ctla2a	2.08488e-250	0.454509	0.236	0.087	2.06424e-246	T cells	Ctla2a
Ciita	4.54011e-249	-0.506513	0.002	0.126	4.49516e-245	T cells	Ciita
Fcrl1	5.38811e-248	-0.511213	0.004	0.128	5.33477e-244	T cells	Fcrl1
Rcbtb2	1.16902e-247	0.493611	0.183	0.057	1.15744e-243	T cells	Rcbtb2
Peli1	6.94102e-247	0.378242	0.409	0.208	6.8723e-243	T cells	Peli1
Abhd8	9.16762e-247	0.295562	0.165	0.046	9.07687e-243	T cells	Abhd8
Itpkb	1.45529e-246	0.425169	0.363	0.174	1.44088e-242	T cells	Itpkb
Lgmn	3.14323e-246	-0.747988	0.021	0.16	3.11212e-242	T cells	Lgmn
Ifngr1	7.15857e-246	0.307389	0.593	0.35	7.0877e-242	T cells	Ifngr1
Fyn	1.73645e-244	0.349443	0.388	0.19	1.71926e-240	T cells	Fyn
Sesn1	3.50936e-244	-0.728555	0.148	0.32	3.47462e-240	T cells	Sesn1
Frat2	4.02106e-244	0.398426	0.262	0.106	3.98125e-240	T cells	Frat2
Blvrb	1.04533e-243	-0.497958	0.024	0.162	1.03498e-239	T cells	Blvrb
Irf5	1.9013e-243	-0.460466	0.015	0.148	1.88247e-239	T cells	Irf5
Lrrk2	1.74973e-242	-0.50021	0.003	0.124	1.73241e-238	T cells	Lrrk2
Rpl15	7.68265e-242	0.303944	0.91	0.844	7.60659e-238	T cells	Rpl15
Rack1	2.44648e-241	0.263532	0.927	0.847	2.42226e-237	T cells	Rack1
Cish	6.87007e-241	0.485364	0.137	0.033	6.80206e-237	T cells	Cish
March1	6.30513e-240	-0.477526	0.002	0.122	6.24271e-236	T cells	March1
Wfdc17	6.68347e-240	-1.11297	0.011	0.139	6.61731e-236	T cells	Wfdc17
Birc3	3.86898e-236	-0.634988	0.161	0.34	3.83068e-232	T cells	Birc3
Ptpn22	6.12918e-236	0.377782	0.339	0.159	6.0685e-232	T cells	Ptpn22
Mpeg1	1.85882e-235	-0.908012	0.009	0.134	1.84042e-231	T cells	Mpeg1
Nme2	1.9778e-235	0.388405	0.683	0.514	1.95822e-231	T cells	Nme2
Fam241a	2.51338e-235	0.325756	0.144	0.037	2.4885e-231	T cells	Fam241a
Pxk	4.09459e-235	-0.615796	0.079	0.237	4.05405e-231	T cells	Pxk
Cd72	5.01401e-235	-0.656853	0.061	0.213	4.96437e-231	T cells	Cd72
Ncr1	9.58809e-234	-0.76691	0.004	0.122	9.49317e-230	T cells	Ncr1
Mllt3	1.02662e-233	0.347641	0.19	0.062	1.01645e-229	T cells	Mllt3
Alox5ap	1.15182e-233	-1.04706	0.015	0.143	1.14042e-229	T cells	Alox5ap
Ifi27	3.52102e-232	0.350082	0.332	0.156	3.48616e-228	T cells	Ifi27
Dusp5	8.08752e-231	0.388748	0.481	0.274	8.00745e-227	T cells	Dusp5
Ikbke	2.05991e-228	0.31879	0.138	0.034	2.03951e-224	T cells	Ikbke
Il27ra	2.31976e-228	0.317459	0.184	0.059	2.29679e-224	T cells	Il27ra
Plk2	6.10085e-227	-0.64722	0.032	0.169	6.04045e-223	T cells	Plk2
Ppia	1.25981e-226	0.260079	0.9	0.84	1.24733e-222	T cells	Ppia
Rnf130	2.38155e-226	-0.495032	0.049	0.194	2.35797e-222	T cells	Rnf130
Sept1	6.86039e-226	0.326319	0.571	0.344	6.79247e-222	T cells	Sept1
Frmd8	3.11716e-225	0.306563	0.195	0.067	3.0863e-221	T cells	Frmd8
Socs1	3.25084e-225	0.353149	0.219	0.082	3.21866e-221	T cells	Socs1
Sub1	1.83694e-224	-0.365732	0.747	0.785	1.81875e-220	T cells	Sub1
Ppp3ca	3.53e-224	-0.61489	0.162	0.332	3.49506e-220	T cells	Ppp3ca
2010111I01Rik	8.92838e-224	0.371897	0.169	0.053	8.83999e-220	T cells	2010111I01Rik
Rpl9-ps6	1.01083e-223	0.283686	0.885	0.813	1.00083e-219	T cells	Rpl9-ps6
Ero1lb	7.15719e-223	-0.579123	0.054	0.2	7.08634e-219	T cells	Ero1lb
Fgfr1op	7.18527e-223	-0.549432	0.023	0.153	7.11413e-219	T cells	Fgfr1op
Hs3st1	1.34032e-222	-0.483437	0.003	0.115	1.32705e-218	T cells	Hs3st1
Rasgef1b	3.93396e-221	-0.573142	0.01	0.13	3.89501e-217	T cells	Rasgef1b
Slc12a7	2.38199e-219	0.282934	0.135	0.034	2.3584e-215	T cells	Slc12a7
Pold4	2.11129e-218	-0.615929	0.162	0.319	2.09039e-214	T cells	Pold4
Il10ra	1.36187e-217	-0.507433	0.081	0.239	1.34839e-213	T cells	Il10ra
Galnt6	2.22297e-217	0.29605	0.169	0.053	2.20096e-213	T cells	Galnt6
Mtss1	1.02143e-216	-0.571619	0.043	0.183	1.01132e-212	T cells	Mtss1
Fam102a	3.06685e-216	0.30644	0.216	0.081	3.03649e-212	T cells	Fam102a
Pkib	4.12113e-216	-0.428303	0.004	0.115	4.08033e-212	T cells	Pkib
Fchsd2	4.42211e-216	-0.595449	0.057	0.199	4.37833e-212	T cells	Fchsd2
Dmxl1	1.30588e-214	-0.60932	0.066	0.212	1.29295e-210	T cells	Dmxl1
Itga6	3.26782e-214	0.320451	0.118	0.027	3.23547e-210	T cells	Itga6
Arl6ip5	7.12173e-214	0.324071	0.447	0.249	7.05123e-210	T cells	Arl6ip5
Cxcr3	8.52935e-213	0.33537	0.134	0.036	8.44491e-209	T cells	Cxcr3
Lime1	9.17394e-213	0.264126	0.145	0.041	9.08312e-209	T cells	Lime1
Cd40	1.12682e-211	-0.420606	0.001	0.107	1.11566e-207	T cells	Cd40
Naca	2.85675e-209	0.281858	0.848	0.75	2.82847e-205	T cells	Naca
Ldha	7.70852e-209	0.339015	0.547	0.341	7.6322e-205	T cells	Ldha
Tnfrsf13b	9.82562e-209	-0.473288	0.031	0.16	9.72835e-205	T cells	Tnfrsf13b
Jund	2.37223e-207	-0.323409	0.938	0.95	2.34875e-203	T cells	Jund
Trim25	5.21674e-207	-0.606394	0.078	0.226	5.1651e-203	T cells	Trim25
Cd226	6.75809e-207	0.310431	0.135	0.037	6.69118e-203	T cells	Cd226
Pnrc1	4.1103e-206	0.291649	0.837	0.674	4.06961e-202	T cells	Pnrc1
Snx2	1.87541e-205	-0.542758	0.101	0.253	1.85684e-201	T cells	Snx2
Cited2	1.20077e-204	0.394073	0.298	0.142	1.18888e-200	T cells	Cited2
Plcxd2	1.46657e-203	0.327273	0.259	0.112	1.45205e-199	T cells	Plcxd2
Tes	1.02833e-202	0.320341	0.319	0.155	1.01815e-198	T cells	Tes
Nlrc5	7.03256e-202	0.344644	0.192	0.07	6.96293e-198	T cells	Nlrc5
Bola2	2.85051e-201	0.328032	0.524	0.322	2.82229e-197	T cells	Bola2
Rpl4	2.93724e-201	0.264242	0.872	0.776	2.90816e-197	T cells	Rpl4
Arhgap17	4.07153e-201	-0.543441	0.088	0.237	4.03122e-197	T cells	Arhgap17
Rpl10a	8.32297e-201	0.253302	0.925	0.87	8.24057e-197	T cells	Rpl10a
Zfp318	1.94011e-200	-0.545901	0.035	0.162	1.92091e-196	T cells	Zfp318
Btla	1.04915e-199	-0.544247	0.03	0.153	1.03877e-195	T cells	Btla
Plbd1	8.85217e-199	-0.515449	0.002	0.103	8.76453e-195	T cells	Plbd1
Cxcr4	1.04802e-198	-0.613607	0.235	0.399	1.03765e-194	T cells	Cxcr4
Zeb2	2.41113e-198	-0.548947	0.061	0.204	2.38726e-194	T cells	Zeb2
Ptpn6	3.62101e-197	-0.537585	0.17	0.325	3.58516e-193	T cells	Ptpn6
Pla2g16	7.06512e-196	0.305964	0.295	0.14	6.99517e-192	T cells	Pla2g16
Herpud1	8.38495e-196	-0.595226	0.117	0.268	8.30194e-192	T cells	Herpud1
Ppm1h	4.94653e-194	0.302063	0.172	0.06	4.89756e-190	T cells	Ppm1h
Ifi47	6.21194e-194	0.302621	0.217	0.088	6.15044e-190	T cells	Ifi47
Slco3a1	2.93712e-192	0.287336	0.101	0.022	2.90804e-188	T cells	Slco3a1
Prkcd	3.08669e-192	-0.57603	0.074	0.214	3.05613e-188	T cells	Prkcd
Prr5	4.96194e-192	-0.361839	0.004	0.104	4.91281e-188	T cells	Prr5
Sypl	4.17254e-187	-0.450259	0.044	0.17	4.13124e-183	T cells	Sypl
Cxxc5	1.15582e-186	-0.440984	0.015	0.122	1.14438e-182	T cells	Cxxc5
Cbfa2t3	6.10239e-185	-0.405763	0.005	0.102	6.04198e-181	T cells	Cbfa2t3
Pced1b	6.4975e-185	0.26087	0.13	0.037	6.43318e-181	T cells	Pced1b
Dazap2	1.76989e-184	-0.441889	0.535	0.635	1.75237e-180	T cells	Dazap2
Npm3	1.85785e-184	0.305534	0.356	0.189	1.83946e-180	T cells	Npm3
Zfp36l1	5.02217e-184	-0.464699	0.428	0.553	4.97245e-180	T cells	Zfp36l1
Pmf1	7.21331e-184	-0.460206	0.043	0.166	7.1419e-180	T cells	Pmf1
Gapdh	5.21162e-183	0.314645	0.799	0.67	5.16002e-179	T cells	Gapdh
Gga2	5.40983e-183	-0.392829	0.009	0.109	5.35627e-179	T cells	Gga2
Atp6v0b	8.73283e-183	-0.544295	0.251	0.394	8.64637e-179	T cells	Atp6v0b
Cdk2ap2	5.31459e-182	0.28007	0.55	0.351	5.26198e-178	T cells	Cdk2ap2
Themis2	1.55258e-180	-0.385882	0.006	0.102	1.53721e-176	T cells	Themis2
Stx7	2.61565e-180	-0.433402	0.05	0.175	2.58975e-176	T cells	Stx7
mt-Nd1	2.2979e-176	-0.312565	0.952	0.948	2.27515e-172	T cells	mt-Nd1
H2-T22	2.93832e-176	0.316974	0.461	0.278	2.90923e-172	T cells	H2-T22
Myo1c	1.62312e-175	-0.406998	0.013	0.113	1.60705e-171	T cells	Myo1c
Ptprj	9.53886e-175	-0.433719	0.022	0.13	9.44443e-171	T cells	Ptprj
Stap1	3.23395e-174	-0.529363	0.077	0.207	3.20194e-170	T cells	Stap1
Igtp	1.00832e-173	0.264459	0.124	0.036	9.9834e-170	T cells	Igtp
Gpr132	1.12436e-173	0.358323	0.434	0.252	1.11323e-169	T cells	Gpr132
Gimap9	1.88643e-173	0.289194	0.257	0.119	1.86775e-169	T cells	Gimap9
Bzw2	5.58184e-173	0.252448	0.153	0.053	5.52658e-169	T cells	Bzw2
Clic4	4.81327e-171	-0.46768	0.052	0.173	4.76562e-167	T cells	Clic4
Rnf125	9.42921e-169	0.277584	0.149	0.051	9.33586e-165	T cells	Rnf125
Gm20186	1.64566e-167	0.271964	0.145	0.049	1.62937e-163	T cells	Gm20186
Snx30	5.05727e-167	-0.433388	0.021	0.124	5.0072e-163	T cells	Snx30
Slc25a40	7.71671e-167	0.272791	0.144	0.049	7.64031e-163	T cells	Slc25a40
Iqgap1	6.41256e-166	-0.429688	0.43	0.557	6.34908e-162	T cells	Iqgap1
Erp29	8.16781e-166	-0.507808	0.253	0.382	8.08695e-162	T cells	Erp29
Cyba	2.36534e-165	-0.344278	0.643	0.708	2.34192e-161	T cells	Cyba
Ier5	1.82066e-164	-0.365036	0.515	0.629	1.80264e-160	T cells	Ier5
Gimap7	5.44654e-164	0.352505	0.262	0.13	5.39262e-160	T cells	Gimap7
S100a13	2.00898e-163	0.325372	0.448	0.275	1.98909e-159	T cells	S100a13
Myo1e	2.52048e-163	-0.379834	0.012	0.106	2.49553e-159	T cells	Myo1e
Kctd12	3.70079e-163	-0.486796	0.055	0.174	3.66415e-159	T cells	Kctd12
Dennd4a	4.38259e-163	-0.453016	0.277	0.424	4.33921e-159	T cells	Dennd4a
Gramd1a	1.49228e-161	0.253158	0.348	0.188	1.47751e-157	T cells	Gramd1a
mt-Nd4	5.50614e-161	-0.343044	0.87	0.883	5.45163e-157	T cells	mt-Nd4
Abracl	5.56385e-160	0.306475	0.494	0.315	5.50876e-156	T cells	Abracl
Scpep1	1.17268e-159	-0.353193	0.017	0.114	1.16107e-155	T cells	Scpep1
Trp53i11	8.44149e-159	-0.484856	0.077	0.2	8.35792e-155	T cells	Trp53i11
Mbnl1	1.85022e-158	0.293129	0.667	0.471	1.8319e-154	T cells	Mbnl1
Vps37b	3.05204e-158	0.27112	0.654	0.449	3.02182e-154	T cells	Vps37b
Vsir	1.01255e-157	0.256275	0.265	0.129	1.00252e-153	T cells	Vsir
Baz2b	1.18569e-156	-0.469165	0.075	0.197	1.17396e-152	T cells	Baz2b
Marcksl1	1.81245e-156	-0.594639	0.04	0.148	1.7945e-152	T cells	Marcksl1
Pdcd4	4.85292e-156	0.262038	0.431	0.255	4.80488e-152	T cells	Pdcd4
H2-Q4	7.31095e-156	0.293814	0.614	0.424	7.23857e-152	T cells	H2-Q4
Epsti1	2.97253e-155	0.32214	0.391	0.233	2.9431e-151	T cells	Epsti1
Cfap43	1.02322e-154	-0.502844	0.081	0.203	1.01309e-150	T cells	Cfap43
Fkbp1a	7.65248e-154	0.305184	0.404	0.242	7.57672e-150	T cells	Fkbp1a
Chchd10	1.88995e-153	-0.505238	0.082	0.201	1.87124e-149	T cells	Chchd10
Aes	1.45003e-152	0.264172	0.489	0.308	1.43567e-148	T cells	Aes
Rhoa	1.90546e-152	-0.392137	0.542	0.613	1.88659e-148	T cells	Rhoa
Rnf19a	2.26855e-152	0.313924	0.157	0.059	2.24609e-148	T cells	Rnf19a
Rasal3	3.65864e-152	0.260354	0.303	0.158	3.62242e-148	T cells	Rasal3
Faah	3.21224e-151	0.26341	0.123	0.04	3.18044e-147	T cells	Faah
Esyt2	7.66169e-150	0.291015	0.225	0.104	7.58584e-146	T cells	Esyt2
mt-Nd2	1.15249e-149	-0.309733	0.928	0.93	1.14108e-145	T cells	mt-Nd2
Cd86	4.91284e-149	-0.412206	0.023	0.118	4.8642e-145	T cells	Cd86
Stat1	1.59713e-147	0.331115	0.295	0.16	1.58132e-143	T cells	Stat1
Plekho2	1.89657e-147	-0.490573	0.055	0.167	1.8778e-143	T cells	Plekho2
Bach2	3.11157e-146	-0.576399	0.15	0.278	3.08077e-142	T cells	Bach2
Ifitm3	6.6205e-146	-1.37393	0.037	0.136	6.55496e-142	T cells	Ifitm3
Dnaja1	1.09662e-145	0.282112	0.413	0.25	1.08577e-141	T cells	Dnaja1
Lmbrd1	3.22745e-145	-0.431813	0.047	0.153	3.1955e-141	T cells	Lmbrd1
Rac2	3.42857e-145	0.278357	0.81	0.692	3.39463e-141	T cells	Rac2
Ramp1	2.70088e-144	0.273399	0.187	0.081	2.67414e-140	T cells	Ramp1
Pgap1	5.62265e-144	-0.41524	0.02	0.11	5.56698e-140	T cells	Pgap1
Grn	7.84972e-144	-0.593453	0.031	0.127	7.772e-140	T cells	Grn
Egln2	2.16305e-143	-0.546692	0.103	0.224	2.14164e-139	T cells	Egln2
Pik3cd	2.32118e-143	0.274026	0.457	0.284	2.2982e-139	T cells	Pik3cd
Tiprl	5.84332e-143	0.283976	0.222	0.105	5.78547e-139	T cells	Tiprl
Pik3r5	3.80754e-142	0.264736	0.208	0.096	3.76985e-138	T cells	Pik3r5
Cst7	6.02874e-142	0.25401	0.236	0.114	5.96906e-138	T cells	Cst7
Gstp1	6.75195e-142	0.279985	0.531	0.355	6.68511e-138	T cells	Gstp1
Sept9	1.6904e-141	0.296616	0.3	0.166	1.67367e-137	T cells	Sept9
Ehd4	1.84452e-141	-0.343558	0.032	0.129	1.82626e-137	T cells	Ehd4
Rasgrp1	3.63448e-141	0.278174	0.252	0.127	3.5985e-137	T cells	Rasgrp1
Ly6a	9.05869e-141	0.377217	0.48	0.316	8.96901e-137	T cells	Ly6a
Cblb	1.11688e-140	0.285807	0.287	0.153	1.10583e-136	T cells	Cblb
Gem	2.02781e-140	-0.506344	0.114	0.239	2.00774e-136	T cells	Gem
Eif2ak3	2.06604e-140	-0.540643	0.074	0.187	2.04559e-136	T cells	Eif2ak3
Pitpnc1	2.18319e-140	0.263673	0.24	0.118	2.16158e-136	T cells	Pitpnc1
Emg1	2.9491e-140	0.252222	0.444	0.277	2.9199e-136	T cells	Emg1
Tob1	5.25542e-140	0.306898	0.23	0.112	5.20339e-136	T cells	Tob1
Tmbim4	1.26721e-139	-0.423611	0.11	0.231	1.25466e-135	T cells	Tmbim4
Sell	5.54105e-139	-0.493404	0.273	0.396	5.4862e-135	T cells	Sell
Ndufv3	1.04428e-137	0.260573	0.464	0.297	1.03395e-133	T cells	Ndufv3
Ccl5	1.49497e-137	0.726906	0.526	0.375	1.48017e-133	T cells	Ccl5
Ms4a4c	2.18962e-137	-0.439392	0.049	0.15	2.16794e-133	T cells	Ms4a4c
Ndfip1	1.02944e-136	0.304079	0.465	0.303	1.01925e-132	T cells	Ndfip1
Lst1	2.83503e-136	-0.752653	0.027	0.117	2.80696e-132	T cells	Lst1
Slc9a7	4.31384e-136	-0.354422	0.026	0.116	4.27113e-132	T cells	Slc9a7
Myadm	8.10392e-136	-0.343082	0.019	0.105	8.02369e-132	T cells	Myadm
Man1a	1.93651e-134	-0.47958	0.106	0.222	1.91734e-130	T cells	Man1a
Slc15a4	4.41313e-134	-0.385535	0.027	0.117	4.36944e-130	T cells	Slc15a4
Notch2	1.30794e-133	-0.426082	0.041	0.14	1.295e-129	T cells	Notch2
Tnfrsf18	5.83018e-133	0.298619	0.182	0.081	5.77246e-129	T cells	Tnfrsf18
Bmp2k	8.92762e-133	-0.389498	0.027	0.117	8.83923e-129	T cells	Bmp2k
Lgals1	3.78496e-132	0.273308	0.456	0.29	3.74749e-128	T cells	Lgals1
Itgb7	5.46699e-131	0.287075	0.455	0.296	5.41287e-127	T cells	Itgb7
Gpx1	2.01429e-130	-0.798613	0.498	0.554	1.99435e-126	T cells	Gpx1
Egr1	1.55309e-129	0.600963	0.301	0.174	1.53771e-125	T cells	Egr1
Abhd17b	2.11881e-128	-0.44069	0.109	0.224	2.09783e-124	T cells	Abhd17b
Gngt2	1.21955e-126	-0.517403	0.09	0.197	1.20747e-122	T cells	Gngt2
Cebpb	5.07329e-126	-0.735046	0.429	0.513	5.02306e-122	T cells	Cebpb
Tmod3	1.06711e-125	-0.468411	0.152	0.267	1.05655e-121	T cells	Tmod3
Mbp	1.97739e-125	0.255933	0.23	0.117	1.95781e-121	T cells	Mbp
Aebp2	1.02577e-124	0.303631	0.174	0.078	1.01562e-120	T cells	Aebp2
Camk2d	3.09998e-124	-0.437128	0.119	0.232	3.06929e-120	T cells	Camk2d
Filip1l	1.65306e-123	-0.366991	0.047	0.141	1.63669e-119	T cells	Filip1l
Pml	1.92942e-123	-0.400521	0.056	0.155	1.91032e-119	T cells	Pml
Nrm	5.55847e-122	-0.383606	0.056	0.153	5.50344e-118	T cells	Nrm
Syngr2	1.07566e-121	-0.427953	0.114	0.226	1.06501e-117	T cells	Syngr2
Tsc22d1	1.14626e-121	-0.415194	0.035	0.123	1.13491e-117	T cells	Tsc22d1
Cxcl2	1.94125e-121	-1.96998	0.042	0.131	1.92203e-117	T cells	Cxcl2
Apobec3	6.9197e-120	-0.46695	0.188	0.303	6.85119e-116	T cells	Apobec3
Prcp	2.95516e-118	-0.331817	0.036	0.123	2.92591e-114	T cells	Prcp
Klf4	5.60745e-117	-0.473708	0.149	0.264	5.55193e-113	T cells	Klf4
Map3k8	1.47936e-116	-0.372529	0.09	0.198	1.46472e-112	T cells	Map3k8
Anxa1	2.45605e-116	-0.520382	0.027	0.107	2.43174e-112	T cells	Anxa1
Tagap	8.72236e-116	0.272605	0.351	0.213	8.63601e-112	T cells	Tagap
Ezr	9.20592e-116	-0.463518	0.407	0.493	9.11479e-112	T cells	Ezr
Crybg1	3.087e-115	0.266702	0.183	0.088	3.05644e-111	T cells	Crybg1
Uvrag	2.06005e-114	-0.440424	0.119	0.227	2.03966e-110	T cells	Uvrag
Hexim1	3.33325e-114	0.267206	0.262	0.144	3.30025e-110	T cells	Hexim1
Grb2	9.95521e-114	-0.447643	0.199	0.313	9.85665e-110	T cells	Grb2
Ehd1	1.40216e-110	-0.506774	0.085	0.183	1.38828e-106	T cells	Ehd1
Gdi2	2.09055e-110	-0.427905	0.363	0.456	2.06985e-106	T cells	Gdi2
Psap	5.79077e-110	-1.1102	0.445	0.498	5.73344e-106	T cells	Psap
Ccl3	7.16703e-110	-0.711045	0.095	0.201	7.09608e-106	T cells	Ccl3
Plekha2	1.47753e-109	-0.44972	0.118	0.222	1.46291e-105	T cells	Plekha2
Ifng	1.70865e-109	0.369115	0.203	0.105	1.69173e-105	T cells	Ifng
Mgrn1	1.01151e-108	-0.340584	0.04	0.123	1.0015e-104	T cells	Mgrn1
Lyz2	8.41298e-108	-2.28304	0.09	0.184	8.3297e-104	T cells	Lyz2
Zbtb10	9.9592e-108	-0.41338	0.04	0.125	9.86061e-104	T cells	Zbtb10
Sp140	1.00792e-107	-0.414696	0.11	0.21	9.97943e-104	T cells	Sp140
Anxa2	1.9852e-107	-0.636523	0.166	0.27	1.96555e-103	T cells	Anxa2
Lamp2	4.12935e-106	-0.355311	0.04	0.123	4.08847e-102	T cells	Lamp2
Ncf4	8.02292e-104	-0.367817	0.107	0.207	7.94349e-100	T cells	Ncf4
Map3k1	1.17872e-102	-0.444727	0.083	0.178	1.16705e-98	T cells	Map3k1
Vgll4	1.39196e-102	0.260672	0.289	0.171	1.37818e-98	T cells	Vgll4
mt-Nd5	2.76887e-102	-0.282355	0.763	0.77	2.74145e-98	T cells	mt-Nd5
Arap1	2.90886e-102	-0.359586	0.054	0.141	2.88006e-98	T cells	Arap1
Trib1	4.60188e-102	-0.444755	0.054	0.141	4.55632e-98	T cells	Trib1
Nap1l1	1.04695e-101	-0.412906	0.303	0.405	1.03658e-97	T cells	Nap1l1
Nr4a1	6.53107e-101	-0.314193	0.327	0.446	6.46641e-97	T cells	Nr4a1
Tigit	1.94892e-100	0.27434	0.136	0.06	1.92963e-96	T cells	Tigit
Tmem243	3.05387e-100	-0.358255	0.078	0.169	3.02363e-96	T cells	Tmem243
Cd82	1.67585e-99	0.295131	0.313	0.196	1.65926e-95	T cells	Cd82
Gabarap	2.4082e-98	-0.336353	0.499	0.553	2.38436e-94	T cells	Gabarap
1110059E24Rik	8.38118e-98	-0.29689	0.031	0.105	8.2982e-94	T cells	1110059E24Rik
Pmaip1	3.16029e-97	-0.348091	0.078	0.171	3.129e-93	T cells	Pmaip1
Ctsc	5.95081e-97	-0.395316	0.119	0.216	5.8919e-93	T cells	Ctsc
Rnf216	7.53952e-97	-0.286159	0.029	0.102	7.46488e-93	T cells	Rnf216
Sorl1	2.30705e-96	-0.464172	0.196	0.297	2.28421e-92	T cells	Sorl1
Ppdpf	4.12357e-96	-0.398944	0.348	0.431	4.08275e-92	T cells	Ppdpf
Tgfb1	2.06866e-94	-0.37097	0.248	0.347	2.04818e-90	T cells	Tgfb1
Myc	5.6065e-94	-0.483468	0.1	0.19	5.551e-90	T cells	Myc
Parp1	5.63051e-93	-0.360273	0.08	0.167	5.57477e-89	T cells	Parp1
Ccrl2	8.77636e-93	-0.741729	0.037	0.111	8.68947e-89	T cells	Ccrl2
S100a10	2.09294e-92	0.335383	0.691	0.554	2.07222e-88	T cells	S100a10
Sat1	1.5617e-90	-0.498213	0.279	0.367	1.54624e-86	T cells	Sat1
Tec	2.19365e-90	-0.357439	0.039	0.112	2.17194e-86	T cells	Tec
Rassf3	2.59974e-90	-0.386587	0.068	0.152	2.57401e-86	T cells	Rassf3
Map4k1	2.01164e-89	-0.371541	0.107	0.199	1.99173e-85	T cells	Map4k1
Klre1	1.86545e-88	-0.431459	0.055	0.135	1.84698e-84	T cells	Klre1
Vars	1.89736e-88	-0.38128	0.125	0.216	1.87858e-84	T cells	Vars
Gm26532	7.27864e-88	-0.328691	0.098	0.191	7.20658e-84	T cells	Gm26532
Plp2	8.57482e-88	-0.331272	0.101	0.189	8.48993e-84	T cells	Plp2
Mif4gd	9.46578e-88	-0.389241	0.123	0.214	9.37207e-84	T cells	Mif4gd
Srgn	5.6294e-86	-0.250711	0.856	0.836	5.57367e-82	T cells	Srgn
Lrmp	1.50984e-84	-0.370064	0.119	0.209	1.49489e-80	T cells	Lrmp
Lpgat1	2.67833e-84	-0.280448	0.034	0.102	2.65181e-80	T cells	Lpgat1
Trp53inp2	6.84937e-84	-0.312964	0.047	0.119	6.78156e-80	T cells	Trp53inp2
Sdcbp	2.59796e-83	-0.394009	0.21	0.302	2.57224e-79	T cells	Sdcbp
Slc12a6	1.37981e-82	-0.334881	0.061	0.138	1.36615e-78	T cells	Slc12a6
Nsf	2.29022e-82	-0.388613	0.061	0.138	2.26754e-78	T cells	Nsf
AB124611	4.53328e-82	-0.367308	0.166	0.255	4.4884e-78	T cells	AB124611
Tmem131l	9.46038e-81	-0.369218	0.09	0.173	9.36672e-77	T cells	Tmem131l
Cdc42	2.04833e-79	-0.254013	0.628	0.657	2.02805e-75	T cells	Cdc42
Id3	5.5244e-79	-0.504695	0.064	0.138	5.46971e-75	T cells	Id3
St3gal1	1.02684e-78	-0.275978	0.049	0.12	1.01668e-74	T cells	St3gal1
Zfp706	5.55689e-78	-0.343661	0.36	0.429	5.50187e-74	T cells	Zfp706
Nrip1	6.96305e-78	0.296054	0.197	0.113	6.89412e-74	T cells	Nrip1
Rrbp1	2.07971e-77	-0.36836	0.171	0.262	2.05912e-73	T cells	Rrbp1
St6gal1	7.02544e-77	-0.357699	0.079	0.156	6.95589e-73	T cells	St6gal1
Dgkd	1.23878e-76	-0.40763	0.205	0.293	1.22652e-72	T cells	Dgkd
Csnk1g3	2.26776e-76	-0.353277	0.091	0.171	2.24531e-72	T cells	Csnk1g3
Hexa	4.68017e-74	-0.340931	0.065	0.137	4.63384e-70	T cells	Hexa
Cd38	6.64011e-74	-0.251025	0.051	0.12	6.57437e-70	T cells	Cd38
Pten	6.74443e-73	-0.365954	0.144	0.228	6.67766e-69	T cells	Pten
Stt3b	6.92216e-73	-0.450492	0.21	0.293	6.85363e-69	T cells	Stt3b
D1Ertd622e	2.02531e-72	-0.285059	0.06	0.131	2.00526e-68	T cells	D1Ertd622e
Neurl3	2.21121e-72	-0.349171	0.13	0.216	2.18931e-68	T cells	Neurl3
Ikzf3	2.81015e-72	-0.318729	0.186	0.274	2.78233e-68	T cells	Ikzf3
Malt1	5.38746e-72	-0.381802	0.252	0.341	5.33413e-68	T cells	Malt1
Klhl24	1.00366e-71	-0.365844	0.148	0.233	9.93725e-68	T cells	Klhl24
Sqstm1	1.10665e-71	-0.370885	0.438	0.494	1.09569e-67	T cells	Sqstm1
Txndc5	1.23681e-70	-0.307885	0.082	0.157	1.22456e-66	T cells	Txndc5
Hif1a	2.61125e-70	0.301241	0.288	0.192	2.5854e-66	T cells	Hif1a
Bmyc	5.26164e-69	-0.300211	0.079	0.149	5.20955e-65	T cells	Bmyc
Tmem55b	1.1642e-68	-0.356525	0.114	0.192	1.15268e-64	T cells	Tmem55b
Tmem123	2.29975e-68	-0.3502	0.183	0.265	2.27698e-64	T cells	Tmem123
Fuca1	9.46611e-68	-0.336931	0.116	0.193	9.3724e-64	T cells	Fuca1
Spag9	9.43624e-67	-0.339824	0.09	0.165	9.34282e-63	T cells	Spag9
Jmjd1c	1.2899e-66	-0.376254	0.181	0.264	1.27713e-62	T cells	Jmjd1c
Prkce	1.38635e-65	-0.319036	0.044	0.104	1.37262e-61	T cells	Prkce
Sh3bp5	2.44475e-64	-0.367042	0.155	0.232	2.42055e-60	T cells	Sh3bp5
Ubl3	1.17999e-62	-0.281988	0.246	0.329	1.16831e-58	T cells	Ubl3
Mapkapk2	5.77499e-62	-0.310317	0.09	0.162	5.71781e-58	T cells	Mapkapk2
Hip1r	1.23902e-61	-0.327717	0.083	0.152	1.22676e-57	T cells	Hip1r
Eml4	1.79015e-61	-0.330809	0.103	0.176	1.77242e-57	T cells	Eml4
Tcirg1	3.7012e-61	-0.286885	0.071	0.138	3.66456e-57	T cells	Tcirg1
Vim	4.14698e-61	-0.370269	0.524	0.564	4.10592e-57	T cells	Vim
Lbh	4.62388e-60	-0.372984	0.297	0.367	4.57811e-56	T cells	Lbh
S100a4	9.63731e-60	0.300355	0.227	0.148	9.5419e-56	T cells	S100a4
Irf2bp2	2.97414e-57	-0.447943	0.212	0.286	2.9447e-53	T cells	Irf2bp2
Adgre5	4.02806e-57	-0.309256	0.412	0.468	3.98818e-53	T cells	Adgre5
Lgals3	4.44072e-57	-0.456094	0.113	0.185	4.39676e-53	T cells	Lgals3
Med13	6.42238e-57	-0.284232	0.086	0.153	6.3588e-53	T cells	Med13
Mt1	8.0881e-57	-0.533848	0.046	0.102	8.00803e-53	T cells	Mt1
Msrb1	1.8402e-56	-0.706207	0.092	0.154	1.82198e-52	T cells	Msrb1
Smap2	5.67219e-56	-0.327554	0.265	0.335	5.61603e-52	T cells	Smap2
1700017B05Rik	1.81296e-55	-0.32221	0.072	0.134	1.79501e-51	T cells	1700017B05Rik
Gpcpd1	2.88214e-55	-0.308436	0.138	0.209	2.8536e-51	T cells	Gpcpd1
Sh3glb1	1.51691e-54	-0.295624	0.325	0.388	1.50189e-50	T cells	Sh3glb1
Per1	5.05764e-54	-0.294765	0.332	0.405	5.00757e-50	T cells	Per1
Epn1	4.00253e-53	-0.278475	0.159	0.23	3.9629e-49	T cells	Epn1
Reep5	4.28676e-53	-0.269505	0.387	0.443	4.24432e-49	T cells	Reep5
Hsp90b1	5.62548e-53	-0.381999	0.464	0.505	5.56979e-49	T cells	Hsp90b1
Slc38a1	2.12082e-52	-0.364357	0.232	0.303	2.09982e-48	T cells	Slc38a1
Nfe2l2	3.03614e-52	-0.279774	0.079	0.14	3.00608e-48	T cells	Nfe2l2
Atp6ap1	9.52031e-52	-0.275029	0.119	0.185	9.42605e-48	T cells	Atp6ap1
Chkb	9.59964e-52	-0.294576	0.084	0.147	9.5046e-48	T cells	Chkb
Nfkbid	1.66917e-51	-0.263938	0.121	0.192	1.65265e-47	T cells	Nfkbid
Sik1	2.7931e-51	-0.277483	0.164	0.237	2.76545e-47	T cells	Sik1
Rgs2	9.97359e-51	-0.252788	0.411	0.483	9.87485e-47	T cells	Rgs2
Foxn3	1.9779e-50	-0.312595	0.228	0.3	1.95832e-46	T cells	Foxn3
Hmgn1	2.34981e-50	-0.334673	0.342	0.391	2.32655e-46	T cells	Hmgn1
Tspan13	2.73371e-50	-0.354642	0.246	0.31	2.70664e-46	T cells	Tspan13
Ppp1r16b	9.62048e-50	-0.357279	0.12	0.186	9.52524e-46	T cells	Ppp1r16b
Gzma	5.17772e-49	-1.05792	0.14	0.201	5.12646e-45	T cells	Gzma
Mafg	5.71734e-49	-0.285707	0.052	0.104	5.66073e-45	T cells	Mafg
Dnajc7	1.21549e-48	-0.346824	0.21	0.272	1.20345e-44	T cells	Dnajc7
Fam49b	2.62111e-47	-0.289771	0.376	0.422	2.59516e-43	T cells	Fam49b
Neat1	5.37187e-47	-0.368443	0.168	0.234	5.31869e-43	T cells	Neat1
Pgls	5.56869e-46	-0.313351	0.319	0.368	5.51356e-42	T cells	Pgls
Treml2	7.39171e-46	-0.336933	0.067	0.12	7.31853e-42	T cells	Treml2
Ninj1	1.59889e-45	-0.255281	0.061	0.114	1.58307e-41	T cells	Ninj1
Fbxo11	1.76727e-45	-0.259982	0.065	0.118	1.74978e-41	T cells	Fbxo11
Prf1	1.88858e-45	-0.666171	0.087	0.14	1.86989e-41	T cells	Prf1
Ddit3	4.81086e-45	-0.353227	0.111	0.171	4.76323e-41	T cells	Ddit3
Pglyrp1	3.19219e-44	-0.468641	0.172	0.233	3.16059e-40	T cells	Pglyrp1
Pag1	3.44985e-44	-0.328507	0.165	0.227	3.4157e-40	T cells	Pag1
Ptk2b	1.43086e-43	-0.305464	0.208	0.272	1.4167e-39	T cells	Ptk2b
Grk2	2.7655e-43	-0.269798	0.372	0.423	2.73812e-39	T cells	Grk2
Man2b1	7.14652e-43	-0.260146	0.123	0.184	7.07577e-39	T cells	Man2b1
Ago2	8.29496e-43	-0.463123	0.185	0.243	8.21284e-39	T cells	Ago2
Rilpl2	8.44044e-43	-0.286434	0.121	0.182	8.35688e-39	T cells	Rilpl2
Tmed5	8.85902e-43	-0.278569	0.173	0.236	8.77132e-39	T cells	Tmed5
Csk	1.84007e-42	-0.266885	0.287	0.343	1.82185e-38	T cells	Csk
BC005624	4.7137e-42	-0.271083	0.172	0.234	4.66704e-38	T cells	BC005624
Lamp1	1.49995e-41	-0.38978	0.232	0.283	1.4851e-37	T cells	Lamp1
Gm2a	1.14571e-40	-0.332581	0.153	0.21	1.13437e-36	T cells	Gm2a
Arpc5l	1.65851e-40	-0.295742	0.229	0.283	1.64209e-36	T cells	Arpc5l
St8sia4	1.766e-40	-0.255457	0.115	0.172	1.74851e-36	T cells	St8sia4
Add3	2.60644e-40	-0.274099	0.187	0.246	2.58064e-36	T cells	Add3
Itsn2	3.15015e-40	-0.300263	0.183	0.242	3.11896e-36	T cells	Itsn2
Bst2	1.97778e-39	-0.357967	0.317	0.221	1.9582e-35	T cells	Bst2
Adrb2	1.99733e-39	-0.264418	0.099	0.153	1.97756e-35	T cells	Adrb2
Tmem189	3.40672e-39	-0.274605	0.076	0.126	3.373e-35	T cells	Tmem189
Kdm6b	9.70977e-39	-0.293281	0.269	0.331	9.61364e-35	T cells	Kdm6b
Rnf149	1.58062e-38	-0.512317	0.078	0.127	1.56497e-34	T cells	Rnf149
Scaf11	1.67298e-38	-0.279155	0.249	0.305	1.65642e-34	T cells	Scaf11
Kmt2e	3.0281e-38	-0.258896	0.35	0.4	2.99812e-34	T cells	Kmt2e
Impact	7.18663e-38	-0.317522	0.07	0.12	7.11548e-34	T cells	Impact
mt-Nd3	1.06823e-37	-0.28469	0.384	0.436	1.05766e-33	T cells	mt-Nd3
Zfand5	1.48485e-37	-0.276067	0.143	0.199	1.47015e-33	T cells	Zfand5
Cstb	2.06531e-37	-0.330203	0.179	0.234	2.04486e-33	T cells	Cstb
Atp6v1b2	4.53144e-37	-0.260508	0.097	0.149	4.48658e-33	T cells	Atp6v1b2
Cdt1	5.85018e-37	-0.29539	0.103	0.155	5.79226e-33	T cells	Cdt1
Tpm4	6.18796e-37	-0.251344	0.181	0.24	6.1267e-33	T cells	Tpm4
Rabgap1l	1.02235e-35	-0.273445	0.215	0.267	1.01223e-31	T cells	Rabgap1l
Nampt	4.82615e-35	-0.277753	0.059	0.103	4.77837e-31	T cells	Nampt
Snx20	3.37737e-34	-0.256584	0.114	0.166	3.34394e-30	T cells	Snx20
Taldo1	8.77392e-33	-0.336201	0.315	0.348	8.68706e-29	T cells	Taldo1
Zbtb20	3.06136e-32	-0.305161	0.11	0.16	3.03105e-28	T cells	Zbtb20
Macf1	3.69564e-32	-0.257717	0.378	0.412	3.65906e-28	T cells	Macf1
Crlf2	2.42772e-31	-0.250274	0.14	0.191	2.40369e-27	T cells	Crlf2
Yeats4	1.13884e-30	-0.280335	0.196	0.243	1.12757e-26	T cells	Yeats4
Mtdh	1.26081e-30	-0.250676	0.318	0.361	1.24833e-26	T cells	Mtdh
Atp1b1	1.89638e-30	-0.29732	0.08	0.122	1.8776e-26	T cells	Atp1b1
Fli1	1.46441e-29	-0.252086	0.177	0.226	1.44991e-25	T cells	Fli1
Itgb1	3.18648e-29	0.292253	0.266	0.21	3.15493e-25	T cells	Itgb1
Atp6v0d1	5.77187e-29	-0.26361	0.145	0.192	5.71473e-25	T cells	Atp6v0d1
Ccnl1	5.85208e-29	-0.266985	0.513	0.528	5.79414e-25	T cells	Ccnl1
Cd9	1.01123e-28	-0.34996	0.082	0.122	1.00122e-24	T cells	Cd9
Ets2	1.42854e-28	-0.340133	0.087	0.131	1.41439e-24	T cells	Ets2
Wbp2	2.5215e-28	-0.259491	0.211	0.256	2.49653e-24	T cells	Wbp2
Cd44	9.44285e-28	-0.380806	0.184	0.232	9.34937e-24	T cells	Cd44
Otulin	4.3394e-26	-0.263117	0.108	0.151	4.29644e-22	T cells	Otulin
Ddx54	1.1416e-25	-0.254826	0.138	0.182	1.1303e-21	T cells	Ddx54
Hist1h1c	6.92418e-25	-0.274112	0.209	0.253	6.85563e-21	T cells	Hist1h1c
Cyth1	7.10837e-25	-0.325877	0.209	0.25	7.03799e-21	T cells	Cyth1
Xbp1	2.28449e-24	-0.250728	0.126	0.17	2.26187e-20	T cells	Xbp1
Bcl2l11	2.44245e-22	-0.309087	0.122	0.16	2.41827e-18	T cells	Bcl2l11
Atp2b1	1.46763e-21	-0.253358	0.274	0.314	1.4531e-17	T cells	Atp2b1
Kras	3.7888e-21	-0.272861	0.205	0.241	3.75129e-17	T cells	Kras
Atp6v1h	9.3197e-19	-0.276538	0.119	0.154	9.22744e-15	T cells	Atp6v1h
Adipor1	4.98287e-17	-0.260741	0.249	0.276	4.93354e-13	T cells	Adipor1
Prdx5	5.29934e-16	-0.356737	0.292	0.308	5.24688e-12	T cells	Prdx5
Grina	1.40971e-14	-0.323859	0.149	0.18	1.39575e-10	T cells	Grina
Mxd1	6.3269e-11	-0.336371	0.134	0.157	6.26426e-07	T cells	Mxd1
Efhd2	8.85897e-09	-0.250579	0.263	0.276	8.77127e-05	T cells	Efhd2
Mcl1	8.37845e-08	-0.317718	0.466	0.446	0.000829551	T cells	Mcl1
Foxo1	5.38837e-07	-0.252125	0.293	0.297	0.00533503	T cells	Foxo1
Cd7	0	2.33801	0.827	0.178	0	ILCs	Cd7
Xcl1	0	2.19471	0.767	0.081	0	ILCs	Xcl1
Gzmb	0	1.97586	0.709	0.158	0	ILCs	Gzmb
Rgs1	0	1.9118	0.878	0.356	0	ILCs	Rgs1
Ccl4.1	0	1.50102	0.734	0.215	0	ILCs	Ccl4
Cd160	0	1.34794	0.544	0.053	0	ILCs	Cd160
Il2rb	0	1.30876	0.885	0.244	0	ILCs	Il2rb
Cd3g.1	0	1.27197	0.691	0.282	0	ILCs	Cd3g
Ctsw	0	1.26171	0.816	0.214	0	ILCs	Ctsw
Fcer1g.1	0	1.2506	0.873	0.22	0	ILCs	Fcer1g
Klra5	0	1.16991	0.177	0.005	0	ILCs	Klra5
Klrd1	0	1.15438	0.716	0.173	0	ILCs	Klrd1
AW112010	0	1.14489	0.952	0.43	0	ILCs	AW112010
Trdc	0	1.12096	0.315	0.022	0	ILCs	Trdc
Nkg7.1	0	1.09599	0.932	0.304	0	ILCs	Nkg7
Klrk1	0	1.05779	0.587	0.102	0	ILCs	Klrk1
Ccl5.1	0	1.0426	0.969	0.39	0	ILCs	Ccl5
Itga1	0	1.01175	0.352	0.035	0	ILCs	Itga1
Spry2	0	0.965909	0.361	0.042	0	ILCs	Spry2
Klrc1	0	0.95673	0.361	0.061	0	ILCs	Klrc1
Ifng.1	0	0.948734	0.499	0.115	0	ILCs	Ifng
Klre1.1	0	0.937776	0.543	0.087	0	ILCs	Klre1
Hcst.1	0	0.91576	0.876	0.447	0	ILCs	Hcst
Fgl2	0	0.882356	0.427	0.079	0	ILCs	Fgl2
Ncr1.1	0	0.833929	0.373	0.071	0	ILCs	Ncr1
Efhd2.1	0	0.827434	0.681	0.25	0	ILCs	Efhd2
Gm19585	0	0.823797	0.5	0.117	0	ILCs	Gm19585
Acot7	0	0.797016	0.391	0.075	0	ILCs	Acot7
Chn2	0	0.775269	0.313	0.042	0	ILCs	Chn2
Tcrg-C4	0	0.762978	0.269	0.013	0	ILCs	Tcrg-C4
Serpinb6b	0	0.75806	0.414	0.091	0	ILCs	Serpinb6b
Ikzf2	0	0.704239	0.265	0.038	0	ILCs	Ikzf2
Klrb1b	0	0.691942	0.216	0.026	0	ILCs	Klrb1b
Trgv2	0	0.668717	0.208	0.019	0	ILCs	Trgv2
AC163354.1	0	0.658373	0.188	0.019	0	ILCs	AC163354.1
Ccdc136	0	0.602787	0.204	0.013	0	ILCs	Ccdc136
Trdv4	0	0.502784	0.171	0.014	0	ILCs	Trdv4
2900026A02Rik	0	0.499323	0.161	0.01	0	ILCs	2900026A02Rik
Tcrg-V1	0	0.425799	0.126	0.004	0	ILCs	Tcrg-V1
Cst7.1	8.77034e-302	0.730442	0.485	0.132	8.68351e-298	ILCs	Cst7
Tcrg-C2	9.4533e-301	0.467854	0.164	0.015	9.35971e-297	ILCs	Tcrg-C2
Tigit.1	3.69438e-296	0.707516	0.338	0.069	3.65781e-292	ILCs	Tigit
Serpina3g	1.83301e-290	0.816395	0.344	0.073	1.81487e-286	ILCs	Serpina3g
Zap70.1	3.46153e-290	0.759437	0.478	0.135	3.42727e-286	ILCs	Zap70
Sytl3	2.66493e-289	0.702436	0.467	0.126	2.63855e-285	ILCs	Sytl3
Tcrg-C1	5.35029e-289	0.515853	0.155	0.014	5.29732e-285	ILCs	Tcrg-C1
Nr4a2	4.79987e-285	0.941336	0.519	0.159	4.75235e-281	ILCs	Nr4a2
Osgin1	2.99079e-280	0.651578	0.211	0.028	2.96118e-276	ILCs	Osgin1
Trbc2.1	1.25867e-275	0.868599	0.746	0.325	1.24621e-271	ILCs	Trbc2
Gimap4.1	2.96692e-275	0.855958	0.737	0.342	2.93754e-271	ILCs	Gimap4
Lck.1	1.06705e-274	0.753071	0.747	0.32	1.05649e-270	ILCs	Lck
Rps19	2.04463e-273	-0.736991	0.948	0.959	2.02439e-269	ILCs	Rps19
Tyrobp.1	7.55102e-269	0.705065	0.72	0.27	7.47627e-265	ILCs	Tyrobp
Klrc2	5.40255e-268	0.577588	0.263	0.045	5.34906e-264	ILCs	Klrc2
Tmsb4x	1.71921e-267	0.444604	0.998	0.987	1.70219e-263	ILCs	Tmsb4x
Cd74.1	2.07808e-267	-3.71254	0.215	0.623	2.05751e-263	ILCs	Cd74
Tnfsf10	4.95326e-266	0.455323	0.184	0.023	4.90422e-262	ILCs	Tnfsf10
H2-Ab1.1	2.69985e-265	-2.61617	0.051	0.532	2.67312e-261	ILCs	H2-Ab1
Padi2	1.56335e-263	0.713411	0.342	0.078	1.54787e-259	ILCs	Padi2
H2-Aa.1	1.95228e-263	-2.96714	0.081	0.546	1.93295e-259	ILCs	H2-Aa
Cd244	2.87333e-256	0.543597	0.257	0.046	2.84489e-252	ILCs	Cd244
Prkch.1	6.03293e-255	0.742186	0.517	0.171	5.97321e-251	ILCs	Prkch
Itgax	8.62303e-253	0.679059	0.228	0.037	8.53766e-249	ILCs	Itgax
Thy1.1	4.59661e-252	0.751857	0.602	0.217	4.5511e-248	ILCs	Thy1
H2-K1.1	2.91509e-250	0.516816	0.986	0.911	2.88623e-246	ILCs	H2-K1
Rgs3	1.96337e-249	0.604302	0.319	0.071	1.94393e-245	ILCs	Rgs3
Cd226.1	5.26242e-242	0.598095	0.273	0.055	5.21032e-238	ILCs	Cd226
H2-Eb1.1	9.2693e-242	-2.60951	0.075	0.519	9.17754e-238	ILCs	H2-Eb1
Itgav	1.66509e-241	0.700042	0.313	0.071	1.6486e-237	ILCs	Itgav
Klra1	6.23457e-241	0.603149	0.255	0.047	6.17284e-237	ILCs	Klra1
Zfp36l2	1.62779e-240	0.757728	0.934	0.669	1.61168e-236	ILCs	Zfp36l2
Sh2d2a.1	2.2879e-239	0.764351	0.588	0.22	2.26525e-235	ILCs	Sh2d2a
Dapk2	1.52967e-237	0.472034	0.215	0.035	1.51453e-233	ILCs	Dapk2
Hopx	9.81645e-237	0.690507	0.436	0.131	9.71927e-233	ILCs	Hopx
Ccr7	2.20378e-235	-1.74208	0.063	0.517	2.18196e-231	ILCs	Ccr7
Cd79a.1	2.1912e-234	-2.71654	0.032	0.479	2.16951e-230	ILCs	Cd79a
Trbc1.1	6.94853e-223	0.788079	0.51	0.176	6.87974e-219	ILCs	Trbc1
Id2	2.48442e-222	0.703554	0.727	0.328	2.45983e-218	ILCs	Id2
Txk.1	3.34067e-222	0.702725	0.511	0.178	3.3076e-218	ILCs	Txk
Cxcr6.1	4.25157e-222	0.613819	0.327	0.079	4.20948e-218	ILCs	Cxcr6
Arap3	1.26573e-221	0.360657	0.132	0.014	1.2532e-217	ILCs	Arap3
H2-D1	5.26979e-219	0.505186	0.989	0.948	5.21762e-215	ILCs	H2-D1
Skap1.1	7.10039e-219	0.701091	0.579	0.229	7.0301e-215	ILCs	Skap1
Rinl.1	3.76161e-215	0.670042	0.447	0.147	3.72437e-211	ILCs	Rinl
Ctsd	1.04385e-214	0.56651	0.674	0.289	1.03352e-210	ILCs	Ctsd
Lag3	2.30266e-212	0.533803	0.226	0.042	2.27987e-208	ILCs	Lag3
Serpinb9	3.15849e-212	0.597852	0.313	0.075	3.12722e-208	ILCs	Serpinb9
Klrb1f	8.06305e-212	0.455278	0.151	0.019	7.98323e-208	ILCs	Klrb1f
H2-Q7.1	6.15439e-210	0.660914	0.866	0.544	6.09346e-206	ILCs	H2-Q7
Igkc.1	6.74924e-209	-2.29775	0.079	0.487	6.68242e-205	ILCs	Igkc
Tmsb10.1	2.89803e-208	0.521817	0.989	0.939	2.86934e-204	ILCs	Tmsb10
Atp8a2	1.7846e-207	0.365153	0.129	0.014	1.76693e-203	ILCs	Atp8a2
Ighm.1	7.05341e-207	-1.88192	0.154	0.539	6.98358e-203	ILCs	Ighm
Ifitm10	2.06142e-206	0.568911	0.395	0.116	2.04101e-202	ILCs	Ifitm10
Klrb1c	9.64768e-206	0.706027	0.275	0.062	9.55217e-202	ILCs	Klrb1c
Clnk	1.58944e-205	0.340779	0.119	0.012	1.5737e-201	ILCs	Clnk
Dok2	2.34948e-205	0.601575	0.411	0.126	2.32622e-201	ILCs	Dok2
Emid1	3.50522e-203	0.45219	0.185	0.03	3.47052e-199	ILCs	Emid1
Cd3e.1	5.36708e-203	0.964063	0.624	0.305	5.31395e-199	ILCs	Cd3e
Myl6	1.57061e-202	0.52473	0.939	0.759	1.55506e-198	ILCs	Myl6
Ebf1.1	5.70721e-201	-1.94139	0.01	0.421	5.65071e-197	ILCs	Ebf1
Rps27	8.42889e-199	-0.402838	0.993	0.994	8.34545e-195	ILCs	Rps27
S100a6	4.67997e-198	0.580437	0.767	0.366	4.63364e-194	ILCs	S100a6
Tbx21	1.78491e-196	0.507992	0.261	0.058	1.76724e-192	ILCs	Tbx21
Rps9	5.46477e-195	-0.392698	0.976	0.985	5.41067e-191	ILCs	Rps9
Gimap3.1	9.92757e-193	0.705035	0.709	0.365	9.82929e-189	ILCs	Gimap3
Stk32c	3.59925e-192	0.395886	0.151	0.021	3.56362e-188	ILCs	Stk32c
Rps20	1.96364e-191	-0.536794	0.985	0.976	1.9442e-187	ILCs	Rps20
Itgb2	3.46499e-191	0.619533	0.635	0.285	3.43069e-187	ILCs	Itgb2
Gzma.1	2.14462e-188	0.614303	0.485	0.166	2.12339e-184	ILCs	Gzma
Chsy1	7.83407e-188	0.571766	0.344	0.098	7.75651e-184	ILCs	Chsy1
Pfn1	3.27599e-185	0.582036	0.901	0.779	3.24355e-181	ILCs	Pfn1
St6galnac2	5.47893e-182	0.427514	0.171	0.028	5.42469e-178	ILCs	St6galnac2
Sulf2	1.90079e-180	0.451152	0.194	0.036	1.88197e-176	ILCs	Sulf2
Osbpl3	5.94643e-178	0.496193	0.257	0.061	5.88756e-174	ILCs	Osbpl3
Anxa2.1	6.56092e-176	0.447587	0.57	0.221	6.49597e-172	ILCs	Anxa2
Apol7e	3.68931e-174	0.409575	0.174	0.031	3.65279e-170	ILCs	Apol7e
Ccnd2.1	1.3284e-173	0.657366	0.56	0.24	1.31525e-169	ILCs	Ccnd2
Fau	1.55318e-173	-0.372863	0.986	0.993	1.5378e-169	ILCs	Fau
Rps28	3.56811e-173	-0.433934	0.991	0.982	3.53279e-169	ILCs	Rps28
Bhlhe40	3.81937e-173	0.602417	0.712	0.337	3.78156e-169	ILCs	Bhlhe40
Rps8	9.98655e-173	-0.397057	0.989	0.98	9.88769e-169	ILCs	Rps8
Cox8a	1.09114e-172	0.528155	0.881	0.734	1.08034e-168	ILCs	Cox8a
Gcnt2	1.81557e-172	0.528252	0.201	0.041	1.79759e-168	ILCs	Gcnt2
Iglc2.1	9.55857e-172	-2.04245	0.02	0.385	9.46394e-168	ILCs	Iglc2
Ubb	2.51762e-171	0.451683	0.962	0.905	2.49269e-167	ILCs	Ubb
Baiap3	1.07774e-170	0.447945	0.188	0.036	1.06707e-166	ILCs	Baiap3
Abcb9	7.0698e-170	0.469902	0.204	0.042	6.99981e-166	ILCs	Abcb9
Ccl3.1	4.94874e-165	0.701554	0.434	0.155	4.89974e-161	ILCs	Ccl3
Sept1.1	1.02048e-164	0.588542	0.719	0.395	1.01038e-160	ILCs	Sept1
Rps26	4.8266e-164	-0.430692	0.968	0.967	4.77881e-160	ILCs	Rps26
H2-DMb2.1	5.83662e-164	-1.58116	0.012	0.366	5.77884e-160	ILCs	H2-DMb2
H2-Q6	4.16445e-163	0.614617	0.808	0.479	4.12322e-159	ILCs	H2-Q6
Pglyrp2	1.65547e-162	0.473739	0.248	0.062	1.63908e-158	ILCs	Pglyrp2
Mef2c.1	2.22397e-162	-1.44489	0.021	0.376	2.20195e-158	ILCs	Mef2c
Ly6d.1	1.33187e-161	-1.97735	0.014	0.364	1.31868e-157	ILCs	Ly6d
1810006J02Rik	1.88927e-160	0.279204	0.117	0.015	1.87056e-156	ILCs	1810006J02Rik
1810011H11Rik	5.29197e-159	0.282876	0.104	0.012	5.23958e-155	ILCs	1810011H11Rik
Zyx	2.298e-158	0.563161	0.57	0.257	2.27525e-154	ILCs	Zyx
Ptpn22.1	5.2063e-158	0.618508	0.485	0.198	5.15475e-154	ILCs	Ptpn22
Rpl35	5.47007e-158	-0.511099	0.939	0.94	5.41592e-154	ILCs	Rpl35
Ctss.1	1.11093e-157	-1.26252	0.061	0.412	1.09993e-153	ILCs	Ctss
Rps29	4.2227e-156	-0.380423	0.997	0.993	4.1809e-152	ILCs	Rps29
Tnfaip3.1	3.27456e-155	0.617413	0.916	0.621	3.24214e-151	ILCs	Tnfaip3
Tnfrsf9	5.88075e-155	0.382115	0.132	0.02	5.82253e-151	ILCs	Tnfrsf9
Abcb1a	1.35907e-154	0.411306	0.163	0.03	1.34561e-150	ILCs	Abcb1a
B2m	2.00552e-154	0.358528	0.99	0.947	1.98566e-150	ILCs	B2m
Cd200r4	5.18054e-154	0.251157	0.103	0.012	5.12925e-150	ILCs	Cd200r4
Cd79b.1	1.82915e-153	-1.63218	0.036	0.374	1.81104e-149	ILCs	Cd79b
Selplg.1	1.8283e-152	0.528243	0.756	0.428	1.8102e-148	ILCs	Selplg
Rac2.1	4.67328e-151	0.503756	0.871	0.719	4.62701e-147	ILCs	Rac2
Itgal	5.82637e-151	0.561632	0.61	0.286	5.76869e-147	ILCs	Itgal
Prex1	7.04643e-151	0.569274	0.471	0.19	6.97667e-147	ILCs	Prex1
Dusp5.1	1.44789e-149	0.617899	0.633	0.32	1.43355e-145	ILCs	Dusp5
Prrt1	4.70673e-149	0.34317	0.153	0.027	4.66013e-145	ILCs	Prrt1
Gimap7.1	1.10318e-148	0.580871	0.413	0.156	1.09226e-144	ILCs	Gimap7
Gramd1a.1	1.22223e-148	0.590695	0.51	0.221	1.21013e-144	ILCs	Gramd1a
Sult2b1	7.56208e-147	0.302767	0.111	0.015	7.48721e-143	ILCs	Sult2b1
Mfsd10	1.19243e-146	0.450313	0.228	0.057	1.18062e-142	ILCs	Mfsd10
Ighd.1	1.2964e-143	-1.47685	0.011	0.334	1.28357e-139	ILCs	Ighd
Aes.1	1.04156e-142	0.576383	0.643	0.347	1.03125e-138	ILCs	Aes
Fxyd5.1	2.38529e-140	0.459924	0.839	0.552	2.36168e-136	ILCs	Fxyd5
Rpl30	5.32463e-139	-0.317586	0.993	0.985	5.27192e-135	ILCs	Rpl30
Cd83.1	8.72869e-139	-1.36152	0.028	0.348	8.64228e-135	ILCs	Cd83
Klra7	1.52835e-138	0.633964	0.218	0.054	1.51322e-134	ILCs	Klra7
Syk.1	7.22436e-138	-1.24169	0.061	0.382	7.15284e-134	ILCs	Syk
Dusp1	1.36152e-137	0.716754	0.842	0.642	1.34804e-133	ILCs	Dusp1
Fasl	1.55574e-137	0.446162	0.275	0.081	1.54034e-133	ILCs	Fasl
Pnrc1.1	3.29015e-137	0.524142	0.89	0.714	3.25758e-133	ILCs	Pnrc1
Cxcr3.1	2.1767e-135	0.433935	0.219	0.057	2.15515e-131	ILCs	Cxcr3
Ahnak	3.6289e-135	0.485463	0.737	0.394	3.59297e-131	ILCs	Ahnak
Rpl35a	1.15587e-134	-0.459572	0.957	0.968	1.14442e-130	ILCs	Rpl35a
Itm2b	5.4043e-134	0.534479	0.842	0.651	5.3508e-130	ILCs	Itm2b
Slc3a2	6.46545e-132	0.613905	0.66	0.372	6.40145e-128	ILCs	Slc3a2
Rpl37a	7.42283e-132	-0.32845	0.995	0.991	7.34935e-128	ILCs	Rpl37a
Vps37b.1	3.05258e-131	0.51968	0.789	0.495	3.02235e-127	ILCs	Vps37b
mt-Co2	9.93996e-131	-0.330251	0.99	0.989	9.84155e-127	ILCs	mt-Co2
H2-Ob.1	3.58889e-130	-1.25262	0.013	0.312	3.55336e-126	ILCs	H2-Ob
Gem.1	1.65346e-129	0.621799	0.449	0.188	1.63709e-125	ILCs	Gem
H2-DMa.1	1.82896e-129	-1.17637	0.11	0.409	1.81086e-125	ILCs	H2-DMa
Foxp1.1	3.47482e-129	-0.973416	0.275	0.566	3.44042e-125	ILCs	Foxp1
Btg2	7.20885e-129	0.611843	0.779	0.537	7.13748e-125	ILCs	Btg2
Tnfrsf18.1	1.70411e-128	0.486286	0.302	0.101	1.68724e-124	ILCs	Tnfrsf18
Dusp2	3.79457e-128	0.568504	0.783	0.503	3.75701e-124	ILCs	Dusp2
Mxd4	7.14495e-127	0.50835	0.355	0.132	7.07421e-123	ILCs	Mxd4
AU020206	1.02195e-126	0.557993	0.32	0.112	1.01184e-122	ILCs	AU020206
1810041H14Rik	1.264e-126	0.452651	0.225	0.063	1.25148e-122	ILCs	1810041H14Rik
Pik3r1	1.51813e-126	0.501372	0.48	0.211	1.5031e-122	ILCs	Pik3r1
Klf2.1	7.3394e-126	-0.692071	0.646	0.834	7.26674e-122	ILCs	Klf2
Slamf7	1.18921e-125	0.442295	0.292	0.095	1.17743e-121	ILCs	Slamf7
Ctla2a.1	2.19411e-125	0.514785	0.34	0.121	2.17239e-121	ILCs	Ctla2a
Rps27a	8.96356e-125	-0.306449	0.981	0.983	8.87482e-121	ILCs	Rps27a
Adora2a	4.19528e-124	0.40692	0.224	0.062	4.15375e-120	ILCs	Adora2a
Gimap5	1.13017e-123	0.555411	0.678	0.391	1.11898e-119	ILCs	Gimap5
Cd96.1	6.90198e-123	0.451825	0.23	0.066	6.83365e-119	ILCs	Cd96
Klra9	3.03569e-121	0.376765	0.183	0.043	3.00563e-117	ILCs	Klra9
Pla2g16.1	3.58822e-121	0.490272	0.414	0.174	3.55269e-117	ILCs	Pla2g16
Iglc3.1	5.86884e-121	-1.36671	0.011	0.294	5.81073e-117	ILCs	Iglc3
Bcl2.1	1.48668e-120	0.575688	0.536	0.267	1.47197e-116	ILCs	Bcl2
Cd52	2.60119e-120	0.454553	0.909	0.8	2.57543e-116	ILCs	Cd52
Epsti1.1	3.75795e-120	0.537495	0.533	0.267	3.72075e-116	ILCs	Epsti1
Cd3d.1	6.32841e-120	0.576495	0.587	0.299	6.26576e-116	ILCs	Cd3d
Litaf.1	6.54368e-120	0.442937	0.473	0.203	6.4789e-116	ILCs	Litaf
Ms4a1.1	1.62907e-118	-1.19423	0.008	0.287	1.61295e-114	ILCs	Ms4a1
H3f3a.1	3.05122e-118	-0.735993	0.768	0.823	3.02101e-114	ILCs	H3f3a
Fam189b.1	3.93906e-118	0.463663	0.327	0.122	3.90007e-114	ILCs	Fam189b
Rcn1	6.2094e-118	0.351283	0.163	0.038	6.14792e-114	ILCs	Rcn1
Gm8369	8.13976e-117	-0.988716	0.068	0.355	8.05918e-113	ILCs	Gm8369
Gm20069	1.22477e-116	0.303097	0.134	0.026	1.21265e-112	ILCs	Gm20069
Fcmr.1	6.89493e-116	-1.24288	0.006	0.279	6.82667e-112	ILCs	Fcmr
Rpl39.1	1.30739e-115	-0.301277	0.99	0.979	1.29445e-111	ILCs	Rpl39
Klra3	6.85095e-115	0.359634	0.169	0.039	6.78313e-111	ILCs	Klra3
Ifngr1.1	1.03215e-114	0.444782	0.712	0.407	1.02193e-110	ILCs	Ifngr1
Tesc.1	6.55598e-113	0.405045	0.202	0.056	6.49107e-109	ILCs	Tesc
Evl	2.47308e-112	0.538759	0.516	0.262	2.4486e-108	ILCs	Evl
Myo1f	9.89e-112	0.45315	0.334	0.127	9.79209e-108	ILCs	Myo1f
Ptprcap	1.62123e-111	0.479696	0.785	0.537	1.60518e-107	ILCs	Ptprcap
Runx3	4.91561e-111	0.492855	0.427	0.188	4.86695e-107	ILCs	Runx3
Itm2c	2.14234e-110	0.507637	0.376	0.157	2.12113e-106	ILCs	Itm2c
Gm14029	2.38804e-110	0.299226	0.137	0.029	2.36439e-106	ILCs	Gm14029
Sh3bgrl3	4.9611e-110	0.468029	0.855	0.708	4.91199e-106	ILCs	Sh3bgrl3
Ralgps2.1	1.36846e-109	-1.09911	0.047	0.317	1.35491e-105	ILCs	Ralgps2
Hic1	1.36948e-109	0.311954	0.117	0.022	1.35592e-105	ILCs	Hic1
Itk.1	2.96164e-109	0.520311	0.464	0.217	2.93232e-105	ILCs	Itk
Myo6	4.73279e-109	0.282076	0.122	0.023	4.68593e-105	ILCs	Myo6
Rpl23.1	1.24374e-108	-0.281276	0.991	0.983	1.23142e-104	ILCs	Rpl23
Ccnd3	1.73775e-108	0.542693	0.556	0.304	1.72055e-104	ILCs	Ccnd3
Cd82.1	2.17072e-108	0.461795	0.473	0.218	2.14923e-104	ILCs	Cd82
Ndfip1.1	2.49184e-108	0.490715	0.606	0.338	2.46717e-104	ILCs	Ndfip1
Sept9.1	4.42767e-108	0.480327	0.429	0.194	4.38383e-104	ILCs	Sept9
Sla2	6.20855e-108	0.315234	0.155	0.037	6.14708e-104	ILCs	Sla2
Dnajc15.1	5.94006e-107	0.481315	0.456	0.216	5.88126e-103	ILCs	Dnajc15
Ppp1r18	1.33371e-106	0.505105	0.661	0.412	1.32051e-102	ILCs	Ppp1r18
Ly86.1	3.65126e-106	-0.954116	0.009	0.265	3.61511e-102	ILCs	Ly86
Rps3a1	8.17216e-106	-0.282619	0.985	0.978	8.09125e-102	ILCs	Rps3a1
Rgs2.1	1.74243e-105	0.695527	0.714	0.447	1.72518e-101	ILCs	Rgs2
Eya2	2.04455e-105	0.280076	0.103	0.018	2.02431e-101	ILCs	Eya2
Cd19.1	7.66448e-105	-1.03729	0.005	0.257	7.5886e-101	ILCs	Cd19
Sytl2	8.94854e-105	0.333505	0.158	0.038	8.85995e-101	ILCs	Sytl2
Leprotl1.1	1.14013e-104	0.45161	0.498	0.246	1.12885e-100	ILCs	Leprotl1
Cd55.1	4.13758e-104	-1.03487	0.029	0.285	4.09662e-100	ILCs	Cd55
Bank1.1	9.02885e-104	-1.05868	0.009	0.26	8.93947e-100	ILCs	Bank1
Ptms	4.83804e-103	0.39821	0.409	0.176	4.79014e-99	ILCs	Ptms
Adgrl1	5.49678e-103	0.30569	0.136	0.03	5.44236e-99	ILCs	Adgrl1
Sell.1	1.55475e-102	-0.84563	0.099	0.373	1.53936e-98	ILCs	Sell
Ubac2	3.51106e-102	0.449839	0.39	0.17	3.4763e-98	ILCs	Ubac2
Cish.1	7.41038e-102	0.413055	0.198	0.057	7.33702e-98	ILCs	Cish
Il12rb2	7.6054e-102	0.297295	0.157	0.038	7.53011e-98	ILCs	Il12rb2
Rpl27a	4.20938e-101	-0.280594	0.986	0.972	4.1677e-97	ILCs	Rpl27a
Plaur.1	1.05044e-100	-1.03486	0.018	0.267	1.04004e-96	ILCs	Plaur
Junb	3.51338e-100	0.443882	0.977	0.932	3.4786e-96	ILCs	Junb
Rps4x.1	1.27779e-99	-0.36983	0.953	0.955	1.26514e-95	ILCs	Rps4x
Ppia.1	8.71579e-98	0.331738	0.928	0.854	8.6295e-94	ILCs	Ppia
mt-Co3	1.6367e-97	-0.350896	0.995	0.988	1.62049e-93	ILCs	mt-Co3
Ctsh.1	2.41477e-97	-0.908768	0.005	0.243	2.39086e-93	ILCs	Ctsh
Tpst2	2.61723e-97	0.443855	0.496	0.255	2.59131e-93	ILCs	Tpst2
Actg1	4.4121e-97	0.293267	0.946	0.81	4.36842e-93	ILCs	Actg1
Rnaset2b	8.54877e-97	0.472299	0.462	0.231	8.46414e-93	ILCs	Rnaset2b
Pitpnc1.1	1.25534e-96	0.429487	0.348	0.144	1.24291e-92	ILCs	Pitpnc1
Scd1.1	3.1044e-96	-1.15498	0.009	0.247	3.07367e-92	ILCs	Scd1
Gapdh.1	5.62993e-96	0.46211	0.849	0.701	5.5742e-92	ILCs	Gapdh
Slc9a3r1	1.29627e-95	0.456601	0.456	0.228	1.28344e-91	ILCs	Slc9a3r1
Pld3	1.78842e-95	0.429548	0.328	0.133	1.77071e-91	ILCs	Pld3
Ifi27l2a	3.70791e-95	-0.963411	0.327	0.569	3.6712e-91	ILCs	Ifi27l2a
Jun	3.87611e-95	0.765688	0.736	0.546	3.83774e-91	ILCs	Jun
Serf2	1.50392e-94	0.315607	0.918	0.843	1.48903e-90	ILCs	Serf2
Lgals3.1	3.63567e-94	0.303146	0.367	0.153	3.59968e-90	ILCs	Lgals3
Hmgb2	6.12355e-94	0.44588	0.827	0.62	6.06293e-90	ILCs	Hmgb2
Atp2b4	1.1742e-92	0.346549	0.182	0.053	1.16258e-88	ILCs	Atp2b4
H2-Q4.1	1.44026e-91	0.452673	0.729	0.467	1.426e-87	ILCs	H2-Q4
Cd24a.1	1.61628e-91	-1.03025	0.01	0.237	1.60028e-87	ILCs	Cd24a
Samd3	1.87477e-91	0.321907	0.145	0.036	1.85621e-87	ILCs	Samd3
Pdia3	2.44274e-91	0.487526	0.571	0.327	2.41855e-87	ILCs	Pdia3
Lgals1.1	3.6681e-91	0.255143	0.604	0.325	3.63179e-87	ILCs	Lgals1
S100a11	8.30303e-91	0.364011	0.688	0.452	8.22083e-87	ILCs	S100a11
Rpl7	1.1042e-90	-0.335405	0.928	0.921	1.09327e-86	ILCs	Rpl7
mt-Nd1.1	1.71052e-90	-0.441105	0.937	0.949	1.69359e-86	ILCs	mt-Nd1
Lgals3bp	3.34003e-90	0.42035	0.234	0.082	3.30696e-86	ILCs	Lgals3bp
Ptpn7	3.3731e-90	0.375894	0.225	0.076	3.3397e-86	ILCs	Ptpn7
Lcp2.1	9.27125e-90	0.398124	0.33	0.14	9.17947e-86	ILCs	Lcp2
Nedd4	9.35674e-90	0.314136	0.169	0.048	9.26411e-86	ILCs	Nedd4
Fnbp1	1.0574e-89	0.454074	0.454	0.225	1.04693e-85	ILCs	Fnbp1
H2-Oa.1	1.66057e-88	-0.904807	0.02	0.245	1.64413e-84	ILCs	H2-Oa
Oaz1	2.3795e-88	0.323785	0.926	0.829	2.35594e-84	ILCs	Oaz1
Rhoc	4.09006e-88	0.272928	0.128	0.03	4.04956e-84	ILCs	Rhoc
Rab37	2.24152e-87	0.324069	0.173	0.051	2.21933e-83	ILCs	Rab37
Rpl36a.1	6.29737e-87	-0.380878	0.914	0.918	6.23502e-83	ILCs	Rpl36a
Rpsa.1	2.17862e-86	-0.282826	0.986	0.977	2.15706e-82	ILCs	Rpsa
Gm8797	3.94711e-86	0.603091	0.424	0.222	3.90804e-82	ILCs	Gm8797
Saraf.1	4.583e-86	0.375097	0.569	0.311	4.53763e-82	ILCs	Saraf
Sqstm1.1	7.69847e-86	0.463323	0.706	0.464	7.62225e-82	ILCs	Sqstm1
Rnaseh2c	8.82139e-86	0.415317	0.438	0.22	8.73406e-82	ILCs	Rnaseh2c
Ifi27.1	2.59219e-85	0.452275	0.408	0.198	2.56653e-81	ILCs	Ifi27
Capzb	4.13491e-85	0.418893	0.74	0.512	4.09398e-81	ILCs	Capzb
Rsrp1	4.94426e-85	0.47564	0.506	0.274	4.89531e-81	ILCs	Rsrp1
Trip4	6.0607e-85	0.347862	0.161	0.046	6.0007e-81	ILCs	Trip4
Klrb1a	1.17373e-84	0.300701	0.18	0.054	1.16211e-80	ILCs	Klrb1a
Mzb1.1	2.57511e-84	-0.908596	0.009	0.222	2.54962e-80	ILCs	Mzb1
Tapbpl	3.01465e-84	0.358407	0.212	0.072	2.98481e-80	ILCs	Tapbpl
Rpl21	3.03635e-84	-0.368031	0.912	0.915	3.00629e-80	ILCs	Rpl21
Psmb8	3.13511e-84	0.438747	0.722	0.516	3.10408e-80	ILCs	Psmb8
mt-Co1	2.17615e-83	-0.313384	1	0.996	2.15461e-79	ILCs	mt-Co1
Rpl18a	3.31016e-83	-0.306366	0.97	0.962	3.27739e-79	ILCs	Rpl18a
S1pr1	3.86578e-83	-0.859106	0.045	0.266	3.82751e-79	ILCs	S1pr1
Ppm1j	7.23128e-83	0.266574	0.128	0.031	7.15969e-79	ILCs	Ppm1j
Glrx	1.01997e-82	0.365482	0.236	0.087	1.00987e-78	ILCs	Glrx
Pou2f2.1	1.18567e-82	-0.865977	0.049	0.273	1.17393e-78	ILCs	Pou2f2
Prkar1a	1.53873e-82	0.425673	0.614	0.375	1.52349e-78	ILCs	Prkar1a
Serp1.1	2.98057e-82	-0.79151	0.317	0.515	2.95106e-78	ILCs	Serp1
Gpx4	4.57865e-82	0.430874	0.653	0.429	4.53332e-78	ILCs	Gpx4
Arsb	6.51249e-82	0.372333	0.237	0.086	6.44802e-78	ILCs	Arsb
S100a13.1	1.11384e-81	0.373512	0.556	0.315	1.10281e-77	ILCs	S100a13
Fam102a.1	2.3488e-81	0.379802	0.278	0.113	2.32554e-77	ILCs	Fam102a
Unc93b1.1	2.57033e-81	-0.822945	0.096	0.323	2.54489e-77	ILCs	Unc93b1
Rps24.1	3.14727e-80	-0.279396	0.993	0.985	3.11611e-76	ILCs	Rps24
Camk2g	4.64564e-80	0.364645	0.194	0.065	4.59965e-76	ILCs	Camk2g
Fcer2a.1	2.02252e-78	-0.910917	0.006	0.205	2.00249e-74	ILCs	Fcer2a
mt-Cytb	2.28264e-78	-0.327045	0.959	0.958	2.26004e-74	ILCs	mt-Cytb
S100a10.1	2.91052e-78	0.32555	0.792	0.584	2.8817e-74	ILCs	S100a10
Prdx6.1	4.8222e-78	0.43317	0.589	0.356	4.77446e-74	ILCs	Prdx6
Rps7.1	7.26679e-78	-0.315496	0.972	0.96	7.19485e-74	ILCs	Rps7
D16Ertd472e	8.65609e-78	0.357862	0.307	0.132	8.5704e-74	ILCs	D16Ertd472e
Socs1.1	1.1156e-77	0.451198	0.275	0.115	1.10456e-73	ILCs	Socs1
Ern1	1.38419e-77	0.259451	0.115	0.028	1.37048e-73	ILCs	Ern1
Arhgap9	1.56663e-77	0.450273	0.405	0.205	1.55112e-73	ILCs	Arhgap9
Ms4a4b.1	3.93966e-77	0.364135	0.521	0.284	3.90066e-73	ILCs	Ms4a4b
Rpl10a.1	1.2881e-76	-0.365863	0.883	0.887	1.27534e-72	ILCs	Rpl10a
Rps5.1	1.49589e-76	-0.327142	0.949	0.944	1.48108e-72	ILCs	Rps5
Adgrg5	4.6259e-76	0.323682	0.14	0.039	4.5801e-72	ILCs	Adgrg5
Rpl6	4.73407e-76	-0.283126	0.953	0.948	4.6872e-72	ILCs	Rpl6
Ccr5	5.22433e-76	0.288638	0.195	0.066	5.17261e-72	ILCs	Ccr5
Cybb.1	6.94674e-76	-1.01214	0.01	0.207	6.87796e-72	ILCs	Cybb
Gata3.1	9.51018e-76	0.376645	0.217	0.079	9.41603e-72	ILCs	Gata3
Nbeal2	3.28381e-75	0.371495	0.223	0.082	3.2513e-71	ILCs	Nbeal2
Cox6c	5.82491e-75	0.356827	0.812	0.634	5.76724e-71	ILCs	Cox6c
Rps6ka1	2.112e-74	0.37456	0.286	0.122	2.09109e-70	ILCs	Rps6ka1
Arl6ip5.1	2.37426e-74	0.385231	0.52	0.297	2.35076e-70	ILCs	Arl6ip5
Fbxw4	3.03836e-74	0.378708	0.18	0.06	3.00828e-70	ILCs	Fbxw4
Cd8a.1	4.53077e-74	0.648173	0.293	0.132	4.48592e-70	ILCs	Cd8a
Tma7	6.10515e-74	0.37599	0.739	0.544	6.0447e-70	ILCs	Tma7
Ppp3cc	6.40921e-74	0.371645	0.339	0.157	6.34576e-70	ILCs	Ppp3cc
Ppp1r12a	7.5993e-74	0.409482	0.501	0.282	7.52407e-70	ILCs	Ppp1r12a
Rpl17	8.73202e-74	-0.320072	0.91	0.919	8.64558e-70	ILCs	Rpl17
Mbnl1.1	1.06001e-73	0.372758	0.742	0.518	1.04951e-69	ILCs	Mbnl1
Rin3	1.21111e-73	0.338547	0.28	0.117	1.19912e-69	ILCs	Rin3
Ptprc	2.07003e-73	0.314515	0.895	0.71	2.04954e-69	ILCs	Ptprc
H2-DMb1.1	3.37248e-73	-0.80872	0.024	0.219	3.33909e-69	ILCs	H2-DMb1
Prkacb	7.88248e-73	0.366724	0.3	0.132	7.80444e-69	ILCs	Prkacb
Bcl2a1b	9.8842e-73	0.359836	0.294	0.127	9.78635e-69	ILCs	Bcl2a1b
Lcp1	3.1359e-72	0.361845	0.725	0.503	3.10486e-68	ILCs	Lcp1
Car2	7.41691e-72	0.354348	0.136	0.038	7.34348e-68	ILCs	Car2
Lasp1	3.97884e-71	0.352323	0.321	0.147	3.93945e-67	ILCs	Lasp1
Itpk1	3.99984e-71	0.342619	0.205	0.075	3.96024e-67	ILCs	Itpk1
Blnk.1	5.98451e-71	-0.772679	0.007	0.192	5.92527e-67	ILCs	Blnk
Klk8.1	6.70603e-71	0.363115	0.294	0.131	6.63964e-67	ILCs	Klk8
Zgpat.1	7.63911e-71	0.371451	0.342	0.163	7.56348e-67	ILCs	Zgpat
Tmem181a	1.49501e-70	0.268231	0.126	0.035	1.48021e-66	ILCs	Tmem181a
Rab19	2.13693e-70	0.263537	0.138	0.04	2.11578e-66	ILCs	Rab19
Armc7	2.38828e-70	0.326875	0.171	0.057	2.36463e-66	ILCs	Armc7
Gimap8	2.67453e-70	0.343957	0.292	0.127	2.64806e-66	ILCs	Gimap8
Tmem59	6.3337e-70	0.388812	0.431	0.231	6.271e-66	ILCs	Tmem59
Pde3b	3.46644e-69	0.351965	0.228	0.089	3.43212e-65	ILCs	Pde3b
Fosb	6.30411e-69	0.43589	0.608	0.389	6.2417e-65	ILCs	Fosb
Sh3bp5.1	9.27327e-69	-0.709225	0.03	0.218	9.18147e-65	ILCs	Sh3bp5
Acap1	1.75631e-68	0.389103	0.415	0.217	1.73892e-64	ILCs	Acap1
Pkig.1	4.16501e-68	-0.707803	0.035	0.225	4.12378e-64	ILCs	Pkig
Pim3	4.32451e-68	0.43903	0.343	0.167	4.28169e-64	ILCs	Pim3
Cxcr4.1	1.50127e-67	-0.78389	0.147	0.361	1.48641e-63	ILCs	Cxcr4
Cnn2	1.88612e-67	0.376301	0.664	0.458	1.86745e-63	ILCs	Cnn2
Fcrla.1	3.75029e-67	-0.711527	0.005	0.179	3.71316e-63	ILCs	Fcrla
Higd1a	3.76479e-67	0.365876	0.421	0.225	3.72752e-63	ILCs	Higd1a
Actn2.1	7.10542e-67	0.308578	0.14	0.042	7.03508e-63	ILCs	Actn2
Ndufa13	2.95309e-66	0.366044	0.693	0.484	2.92386e-62	ILCs	Ndufa13
Atp5g3	3.02533e-66	0.357362	0.754	0.572	2.99538e-62	ILCs	Atp5g3
Blk.1	3.20319e-66	-0.712256	0.004	0.176	3.17148e-62	ILCs	Blk
Cdca4	4.56302e-66	0.270249	0.152	0.048	4.51784e-62	ILCs	Cdca4
Ndufa4	1.78089e-65	0.372381	0.745	0.549	1.76326e-61	ILCs	Ndufa4
Rpl8	1.47619e-64	-0.303895	0.944	0.936	1.46157e-60	ILCs	Rpl8
Rpl18.1	1.71006e-64	-0.262671	0.958	0.948	1.69313e-60	ILCs	Rpl18
Peak1	1.29853e-63	0.32111	0.219	0.087	1.28567e-59	ILCs	Peak1
Unc119	4.66772e-63	0.302179	0.235	0.096	4.62151e-59	ILCs	Unc119
Fosl2	7.55639e-63	0.380145	0.313	0.148	7.48158e-59	ILCs	Fosl2
Anxa6	1.26336e-62	0.346079	0.495	0.286	1.25085e-58	ILCs	Anxa6
Gnptg	1.53597e-62	0.301204	0.229	0.094	1.52077e-58	ILCs	Gnptg
Txnrd1	1.72419e-62	0.281032	0.186	0.068	1.70713e-58	ILCs	Txnrd1
Lat2.1	2.13851e-62	0.348758	0.328	0.157	2.11734e-58	ILCs	Lat2
mt-Atp6	2.33275e-62	-0.340242	0.953	0.96	2.30965e-58	ILCs	mt-Atp6
Neurl3.1	2.63578e-62	0.384952	0.359	0.181	2.60968e-58	ILCs	Neurl3
Nsmaf	3.35671e-62	0.31753	0.258	0.111	3.32348e-58	ILCs	Nsmaf
Cyth4	4.89878e-62	0.303418	0.36	0.179	4.85028e-58	ILCs	Cyth4
Coro2a	7.13618e-62	0.309681	0.197	0.075	7.06554e-58	ILCs	Coro2a
Sema4a	1.33133e-61	0.347435	0.24	0.102	1.31815e-57	ILCs	Sema4a
Gpc1	1.64872e-61	0.253585	0.141	0.044	1.6324e-57	ILCs	Gpc1
Ugcg	2.59311e-61	0.33817	0.402	0.212	2.56744e-57	ILCs	Ugcg
Psme2.1	2.785e-61	0.349261	0.631	0.41	2.75743e-57	ILCs	Psme2
Arpc1b	3.88765e-61	0.313387	0.788	0.617	3.84916e-57	ILCs	Arpc1b
Pax5.1	4.11871e-61	-0.726087	0.005	0.167	4.07793e-57	ILCs	Pax5
Napsa.1	6.83653e-61	-0.802167	0.166	0.348	6.76885e-57	ILCs	Napsa
Ldha.1	6.86418e-61	0.354947	0.602	0.392	6.79623e-57	ILCs	Ldha
Siglecg.1	8.18961e-61	-0.657652	0.003	0.162	8.10853e-57	ILCs	Siglecg
Snn.1	1.05179e-60	-0.668713	0.005	0.165	1.04137e-56	ILCs	Snn
Lrrk1	2.59077e-60	0.278785	0.185	0.069	2.56512e-56	ILCs	Lrrk1
Rasal3.1	7.00905e-60	0.364885	0.367	0.193	6.93966e-56	ILCs	Rasal3
Aplp2	1.52194e-59	0.391836	0.305	0.148	1.50688e-55	ILCs	Aplp2
Rps12	2.05343e-59	-0.255743	0.978	0.969	2.03311e-55	ILCs	Rps12
Cox5a	2.47262e-59	0.366175	0.641	0.444	2.44814e-55	ILCs	Cox5a
Rnf166	2.65064e-59	0.322336	0.309	0.15	2.6244e-55	ILCs	Rnf166
Vpreb3.1	3.24842e-59	-0.74712	0.003	0.158	3.21626e-55	ILCs	Vpreb3
Med28	4.56177e-59	0.339568	0.459	0.266	4.51661e-55	ILCs	Med28
Rpl32.1	4.73558e-59	-0.289715	0.94	0.935	4.6887e-55	ILCs	Rpl32
Ube2g2	5.02483e-59	0.30617	0.252	0.111	4.97508e-55	ILCs	Ube2g2
Rnaset2a	6.84821e-59	0.361517	0.488	0.295	6.78041e-55	ILCs	Rnaset2a
mt-Nd2.1	1.54025e-58	-0.390177	0.922	0.93	1.525e-54	ILCs	mt-Nd2
Tab2	4.89761e-58	0.404455	0.326	0.161	4.84912e-54	ILCs	Tab2
Tiprl.1	5.4243e-58	0.376103	0.28	0.133	5.3706e-54	ILCs	Tiprl
Gbp8	5.65336e-58	0.257767	0.126	0.039	5.59739e-54	ILCs	Gbp8
Tln1	6.94591e-58	0.352685	0.578	0.37	6.87714e-54	ILCs	Tln1
Prr13	7.55103e-58	0.301278	0.594	0.373	7.47627e-54	ILCs	Prr13
Pstpip1	9.31869e-58	0.313254	0.308	0.15	9.22643e-54	ILCs	Pstpip1
Clic1	1.10954e-57	0.327072	0.73	0.547	1.09856e-53	ILCs	Clic1
Eif5a	1.25288e-57	0.345267	0.722	0.54	1.24048e-53	ILCs	Eif5a
Ier2	1.31405e-57	0.31099	0.805	0.617	1.30104e-53	ILCs	Ier2
Capns1	1.63208e-57	0.344503	0.437	0.251	1.61592e-53	ILCs	Capns1
Rasgrp2	3.18909e-57	-0.597149	0.196	0.386	3.15752e-53	ILCs	Rasgrp2
Rpl26	4.07373e-57	-0.288232	0.905	0.896	4.0334e-53	ILCs	Rpl26
Sdf2l1	7.76826e-57	0.288577	0.239	0.104	7.69135e-53	ILCs	Sdf2l1
Tmem256	1.96547e-56	0.317219	0.305	0.15	1.94601e-52	ILCs	Tmem256
Sntb2	1.99971e-56	0.278448	0.134	0.044	1.97991e-52	ILCs	Sntb2
Vasp	2.35031e-56	0.326482	0.534	0.335	2.32704e-52	ILCs	Vasp
Wbp1	2.43098e-56	0.296813	0.219	0.093	2.40691e-52	ILCs	Wbp1
Lamtor4	2.75756e-56	0.30901	0.427	0.238	2.73026e-52	ILCs	Lamtor4
Rpl28	7.35593e-56	-0.293741	0.923	0.905	7.2831e-52	ILCs	Rpl28
Pgm2l1	9.27495e-56	0.313454	0.152	0.053	9.18313e-52	ILCs	Pgm2l1
Dtx3	2.2387e-55	0.275784	0.196	0.078	2.21654e-51	ILCs	Dtx3
Pdcd6ip	4.37407e-55	0.344326	0.406	0.228	4.33077e-51	ILCs	Pdcd6ip
Gimap1	5.1213e-55	0.324944	0.475	0.281	5.0706e-51	ILCs	Gimap1
Gnas	8.41604e-55	0.305507	0.778	0.625	8.33272e-51	ILCs	Gnas
F2r	9.29883e-55	0.29559	0.134	0.044	9.20677e-51	ILCs	F2r
Rplp0.1	1.09025e-54	-0.358864	0.943	0.929	1.07946e-50	ILCs	Rplp0
H2-T22.1	1.11665e-54	0.38095	0.509	0.323	1.10559e-50	ILCs	H2-T22
Cfl1	1.23312e-54	0.261584	0.891	0.791	1.22091e-50	ILCs	Cfl1
Txn1	1.84922e-54	0.251573	0.507	0.305	1.83092e-50	ILCs	Txn1
Lta4h	3.94242e-54	0.279091	0.207	0.087	3.90339e-50	ILCs	Lta4h
Rack1.1	4.75629e-54	-0.285252	0.86	0.871	4.70921e-50	ILCs	Rack1
Nr4a1.1	4.75953e-54	-0.689282	0.237	0.42	4.71241e-50	ILCs	Nr4a1
Bag1	7.52556e-54	0.330618	0.428	0.248	7.45106e-50	ILCs	Bag1
Cd27.1	1.28163e-53	0.288159	0.211	0.09	1.26894e-49	ILCs	Cd27
Esyt1	1.41768e-53	0.343135	0.41	0.232	1.40364e-49	ILCs	Esyt1
Gramd1b	2.05974e-53	0.277135	0.142	0.05	2.03935e-49	ILCs	Gramd1b
Spn	2.15252e-53	0.266357	0.317	0.159	2.13121e-49	ILCs	Spn
Jaml	2.43685e-53	0.314604	0.159	0.059	2.41272e-49	ILCs	Jaml
Pear1	3.00113e-53	0.274805	0.134	0.044	2.97141e-49	ILCs	Pear1
Pim2	4.76842e-53	0.382993	0.252	0.117	4.72122e-49	ILCs	Pim2
Cd22.1	1.0116e-52	-0.604516	0.01	0.154	1.00158e-48	ILCs	Cd22
Gm30211.1	1.24261e-52	-0.748172	0.005	0.146	1.23031e-48	ILCs	Gm30211
Sh3bp1	1.26544e-52	0.298384	0.242	0.111	1.25292e-48	ILCs	Sh3bp1
Nfil3	1.32559e-52	0.327817	0.251	0.115	1.31246e-48	ILCs	Nfil3
Abr	1.52832e-52	0.299876	0.184	0.073	1.51319e-48	ILCs	Abr
mt-Nd4.1	1.72959e-52	-0.411489	0.843	0.881	1.71247e-48	ILCs	mt-Nd4
Ppm1b	2.1909e-52	0.296293	0.201	0.085	2.16921e-48	ILCs	Ppm1b
Nucb1	2.93438e-52	0.32042	0.253	0.119	2.90533e-48	ILCs	Nucb1
Bex3	5.715e-52	0.298637	0.267	0.128	5.65843e-48	ILCs	Bex3
Bach2.1	7.80602e-52	-0.693878	0.082	0.248	7.72874e-48	ILCs	Bach2
Edf1	1.24146e-51	0.314765	0.631	0.437	1.22917e-47	ILCs	Edf1
Sept11	1.84245e-51	0.306761	0.242	0.11	1.82421e-47	ILCs	Sept11
Vps28	2.72703e-51	0.342049	0.508	0.321	2.70003e-47	ILCs	Vps28
Rps25	5.30933e-51	-0.316917	0.82	0.853	5.25676e-47	ILCs	Rps25
Spint2	6.32233e-51	0.291628	0.238	0.11	6.25973e-47	ILCs	Spint2
Cyp4f18.1	6.76453e-51	-0.628537	0.001	0.135	6.69756e-47	ILCs	Cyp4f18
Sept6	6.93439e-51	0.30533	0.369	0.203	6.86574e-47	ILCs	Sept6
Tes.1	7.03771e-51	0.307831	0.36	0.196	6.96804e-47	ILCs	Tes
Mtss1.1	1.05335e-50	-0.609269	0.009	0.148	1.04292e-46	ILCs	Mtss1
Tbc1d10c	1.08876e-50	0.320692	0.42	0.243	1.07799e-46	ILCs	Tbc1d10c
Rpl24.1	1.1149e-50	-0.262445	0.899	0.894	1.10387e-46	ILCs	Rpl24
Anxa11	1.56115e-50	0.310841	0.291	0.148	1.5457e-46	ILCs	Anxa11
Dynll2	2.2148e-50	0.259201	0.205	0.088	2.19288e-46	ILCs	Dynll2
Atp5j	3.10508e-50	0.307963	0.685	0.488	3.07434e-46	ILCs	Atp5j
Rps18.1	3.76363e-50	-0.274942	0.921	0.91	3.72637e-46	ILCs	Rps18
Klf6	5.26091e-50	0.35344	0.835	0.69	5.20882e-46	ILCs	Klf6
Cmah	6.36766e-50	-0.557345	0.02	0.162	6.30462e-46	ILCs	Cmah
Itgb7.1	7.61249e-50	0.371589	0.519	0.334	7.53713e-46	ILCs	Itgb7
Sri	1.29372e-49	0.314671	0.529	0.337	1.28092e-45	ILCs	Sri
Dennd4a.1	1.62724e-49	0.289075	0.575	0.37	1.61113e-45	ILCs	Dennd4a
Pld4.1	1.79818e-49	-0.593388	0.003	0.136	1.78038e-45	ILCs	Pld4
Arrb2	2.86069e-49	0.303243	0.32	0.168	2.83237e-45	ILCs	Arrb2
Tnk2	5.57747e-49	0.308751	0.203	0.087	5.52226e-45	ILCs	Tnk2
B3gnt5.1	5.97556e-49	-0.659022	0.034	0.181	5.9164e-45	ILCs	B3gnt5
Pdcd4.1	6.29429e-49	0.312645	0.484	0.298	6.23197e-45	ILCs	Pdcd4
Dnaja1.1	6.59601e-49	0.334315	0.471	0.289	6.53071e-45	ILCs	Dnaja1
Rab8b	7.2338e-49	0.297553	0.234	0.108	7.16218e-45	ILCs	Rab8b
Spi1.1	8.68003e-49	-0.5594	0.005	0.138	8.5941e-45	ILCs	Spi1
Apoe.1	1.9417e-48	-1.09312	0.023	0.163	1.92248e-44	ILCs	Apoe
Plekho1.1	2.65844e-48	-0.513296	0.009	0.143	2.63212e-44	ILCs	Plekho1
Irf4.1	2.69269e-48	-0.777265	0.022	0.164	2.66603e-44	ILCs	Irf4
Fam129a	2.72346e-48	0.284236	0.152	0.058	2.6965e-44	ILCs	Fam129a
Cbx4	3.11504e-48	0.329695	0.367	0.205	3.0842e-44	ILCs	Cbx4
Lmo2.1	3.85866e-48	-0.509569	0.001	0.129	3.82046e-44	ILCs	Lmo2
Utrn.1	4.18401e-48	0.304603	0.239	0.113	4.14259e-44	ILCs	Utrn
Tox.1	4.59226e-48	0.257203	0.161	0.063	4.5468e-44	ILCs	Tox
Ckb	1.32641e-47	0.287297	0.13	0.046	1.31327e-43	ILCs	Ckb
Aldh2.1	2.72866e-47	-0.501617	0.018	0.154	2.70164e-43	ILCs	Aldh2
Gimap9.1	3.38047e-47	0.279429	0.296	0.153	3.347e-43	ILCs	Gimap9
Cd81.1	3.92475e-47	-0.523849	0.018	0.153	3.8859e-43	ILCs	Cd81
Yaf2	4.034e-47	0.267827	0.203	0.089	3.99406e-43	ILCs	Yaf2
Rel.1	7.54146e-47	-0.625548	0.174	0.344	7.4668e-43	ILCs	Rel
Fam43a.1	7.66088e-47	-0.577383	0.008	0.137	7.58504e-43	ILCs	Fam43a
Satb1	9.87533e-47	-0.672054	0.225	0.393	9.77756e-43	ILCs	Satb1
Os9	2.07111e-46	0.299762	0.257	0.128	2.05061e-42	ILCs	Os9
Stat4	2.25395e-46	0.283649	0.275	0.138	2.23164e-42	ILCs	Stat4
Dnajc1	2.40774e-46	0.297452	0.209	0.094	2.3839e-42	ILCs	Dnajc1
Psmb10	2.98088e-46	0.332259	0.426	0.26	2.95137e-42	ILCs	Psmb10
Wdfy4.1	4.01477e-46	-0.519052	0.003	0.128	3.97502e-42	ILCs	Wdfy4
Snx9.1	4.13209e-46	-0.49269	0.008	0.136	4.09118e-42	ILCs	Snx9
Atp5j2	4.34404e-46	0.294041	0.728	0.561	4.30103e-42	ILCs	Atp5j2
Gpr65	5.22297e-46	0.276566	0.247	0.119	5.17126e-42	ILCs	Gpr65
Csnk2b	1.28486e-45	0.303084	0.446	0.273	1.27214e-41	ILCs	Csnk2b
Rpl5.1	1.34237e-45	-0.303687	0.899	0.9	1.32908e-41	ILCs	Rpl5
Fos	1.48947e-45	0.432162	0.766	0.654	1.47473e-41	ILCs	Fos
Polr2l	1.57118e-45	0.332243	0.475	0.305	1.55562e-41	ILCs	Polr2l
Sept7	2.09479e-45	0.278703	0.345	0.191	2.07405e-41	ILCs	Sept7
Dok3.1	2.72039e-45	-0.490481	0.007	0.133	2.69346e-41	ILCs	Dok3
Aldoa	3.02382e-45	0.329905	0.583	0.41	2.99388e-41	ILCs	Aldoa
Rnase6.1	3.47628e-45	-0.491987	0.003	0.124	3.44187e-41	ILCs	Rnase6
Gbp4	5.05318e-45	0.254247	0.17	0.07	5.00316e-41	ILCs	Gbp4
Dnajc3	1.79868e-44	0.30545	0.4	0.24	1.78087e-40	ILCs	Dnajc3
Atp5h	2.4229e-44	0.272558	0.779	0.63	2.39891e-40	ILCs	Atp5h
Elob	4.63945e-44	0.291538	0.705	0.539	4.59352e-40	ILCs	Elob
Cd48	6.65586e-44	0.266636	0.395	0.23	6.58996e-40	ILCs	Cd48
Tmem176b	7.57796e-44	0.379259	0.124	0.045	7.50293e-40	ILCs	Tmem176b
Bcl11a.1	9.76618e-44	-0.485741	0.003	0.122	9.66949e-40	ILCs	Bcl11a
Pik3cd.1	1.18798e-43	0.298694	0.506	0.327	1.17622e-39	ILCs	Pik3cd
Stard3nl	1.55519e-43	0.301652	0.222	0.107	1.53979e-39	ILCs	Stard3nl
Bin2	2.48185e-43	0.282076	0.483	0.31	2.45728e-39	ILCs	Bin2
Gng2	2.55026e-43	0.292335	0.321	0.177	2.52502e-39	ILCs	Gng2
Spcs2	2.59192e-43	0.304243	0.406	0.247	2.56626e-39	ILCs	Spcs2
2010111I01Rik.1	3.70824e-43	0.277442	0.186	0.082	3.67152e-39	ILCs	2010111I01Rik
Ube2s	3.78218e-43	0.335935	0.46	0.294	3.74473e-39	ILCs	Ube2s
Nrros.1	4.45382e-43	-0.659582	0.067	0.208	4.40973e-39	ILCs	Nrros
St6gal1.1	4.85228e-43	-0.497354	0.016	0.14	4.80425e-39	ILCs	St6gal1
Samhd1	4.97133e-43	-0.560994	0.207	0.358	4.92212e-39	ILCs	Samhd1
Iglc1.1	6.11962e-43	-0.588424	0.005	0.124	6.05904e-39	ILCs	Iglc1
Gpsm3	7.77634e-43	0.287542	0.546	0.366	7.69935e-39	ILCs	Gpsm3
Slbp	9.26851e-43	0.28525	0.325	0.179	9.17675e-39	ILCs	Slbp
Fam105a	1.16714e-42	0.274473	0.255	0.129	1.15558e-38	ILCs	Fam105a
Gm15987.1	1.20514e-42	-0.450519	0.008	0.127	1.19321e-38	ILCs	Gm15987
Hspa8.1	1.52265e-42	0.261734	0.87	0.751	1.50757e-38	ILCs	Hspa8
Myl12a	1.73122e-42	0.27238	0.667	0.493	1.71409e-38	ILCs	Myl12a
Tecpr1	2.01251e-42	0.283998	0.398	0.236	1.99258e-38	ILCs	Tecpr1
Gimap6.1	2.36464e-42	0.267635	0.754	0.563	2.34123e-38	ILCs	Gimap6
Srsf2	2.3984e-42	0.326354	0.561	0.388	2.37465e-38	ILCs	Srsf2
H2afy	2.56118e-42	0.294153	0.518	0.342	2.53583e-38	ILCs	H2afy
Atp6v0a2	3.00902e-42	0.251296	0.188	0.084	2.97923e-38	ILCs	Atp6v0a2
Ppp1r9b	4.77698e-42	0.278242	0.273	0.142	4.72969e-38	ILCs	Ppp1r9b
Serpinb1a.1	5.77747e-42	-0.489822	0.008	0.126	5.72027e-38	ILCs	Serpinb1a
Sumo2	7.30702e-42	0.274168	0.665	0.492	7.23469e-38	ILCs	Sumo2
Ppp1cc	1.1573e-41	0.326444	0.448	0.289	1.14584e-37	ILCs	Ppp1cc
Sipa1	1.21102e-41	0.291555	0.379	0.222	1.19903e-37	ILCs	Sipa1
Ctsz.1	2.43909e-41	-0.560574	0.11	0.255	2.41495e-37	ILCs	Ctsz
Uqcc2	3.58228e-41	0.287688	0.334	0.191	3.54682e-37	ILCs	Uqcc2
Ube2i	4.01584e-41	0.286314	0.507	0.338	3.97608e-37	ILCs	Ube2i
Btg3	4.70187e-41	0.279616	0.238	0.119	4.65532e-37	ILCs	Btg3
Aak1	5.83991e-41	0.258034	0.174	0.076	5.7821e-37	ILCs	Aak1
Ndufa1	6.58565e-41	0.273219	0.569	0.394	6.52045e-37	ILCs	Ndufa1
Cers4	7.89893e-41	0.259969	0.174	0.076	7.82073e-37	ILCs	Cers4
Btla.1	1.4585e-40	-0.513262	0.008	0.122	1.44406e-36	ILCs	Btla
Ptpn18.1	1.76663e-40	0.257707	0.808	0.666	1.74914e-36	ILCs	Ptpn18
5430416N02Rik	3.00134e-40	0.306982	0.184	0.083	2.97162e-36	ILCs	5430416N02Rik
Actr3	3.51323e-40	0.270711	0.695	0.534	3.47845e-36	ILCs	Actr3
Cotl1	3.77327e-40	0.278515	0.571	0.39	3.73592e-36	ILCs	Cotl1
Spib.1	4.19768e-40	-0.481933	0.003	0.112	4.15613e-36	ILCs	Spib
Vgll4.1	4.96629e-40	0.327621	0.344	0.199	4.91712e-36	ILCs	Vgll4
Birc3.1	4.96824e-40	-0.605992	0.144	0.294	4.91905e-36	ILCs	Birc3
Tnfrsf13b.1	5.72517e-40	-0.439075	0.012	0.127	5.66849e-36	ILCs	Tnfrsf13b
Tubb4b	1.00207e-39	0.280168	0.366	0.213	9.92152e-36	ILCs	Tubb4b
Tpd52.1	1.0205e-39	-0.555901	0.029	0.152	1.0104e-35	ILCs	Tpd52
Cd180.1	2.13612e-39	-0.463424	0.001	0.108	2.11497e-35	ILCs	Cd180
Stt3b.1	2.86092e-39	-0.601702	0.132	0.276	2.8326e-35	ILCs	Stt3b
Tecr	3.24045e-39	0.287821	0.405	0.251	3.20837e-35	ILCs	Tecr
Rps15	3.27095e-39	-0.273214	0.864	0.876	3.23857e-35	ILCs	Rps15
Ndufa5	4.00471e-39	0.277332	0.344	0.2	3.96506e-35	ILCs	Ndufa5
Nedd9	4.0565e-39	0.322343	0.329	0.189	4.01634e-35	ILCs	Nedd9
Akna	5.91632e-39	0.263784	0.359	0.211	5.85775e-35	ILCs	Akna
H2afj	6.2231e-39	0.275292	0.717	0.557	6.1615e-35	ILCs	H2afj
Pou2af1.1	6.71671e-39	-0.434029	0.001	0.105	6.65021e-35	ILCs	Pou2af1
1810037I17Rik	7.47036e-39	0.264653	0.53	0.359	7.39641e-35	ILCs	1810037I17Rik
Capg.1	9.40419e-39	-0.479631	0.084	0.225	9.31109e-35	ILCs	Capg
Lypla2	1.02928e-38	0.272607	0.345	0.203	1.01909e-34	ILCs	Lypla2
Tap2	1.05831e-38	0.295959	0.377	0.228	1.04783e-34	ILCs	Tap2
Arf4	1.13725e-38	0.284343	0.488	0.32	1.12599e-34	ILCs	Arf4
Bcl2a1d	1.34545e-38	0.255279	0.147	0.061	1.33213e-34	ILCs	Bcl2a1d
Lrrfip1	2.00791e-38	0.252986	0.311	0.174	1.98803e-34	ILCs	Lrrfip1
Ms4a4c.1	2.9841e-38	-0.446113	0.014	0.126	2.95455e-34	ILCs	Ms4a4c
Cited2.1	4.84067e-38	0.329458	0.315	0.182	4.79275e-34	ILCs	Cited2
Nlrc5.1	5.20483e-38	0.264966	0.208	0.101	5.1533e-34	ILCs	Nlrc5
Cox7a2	7.56738e-38	0.255645	0.687	0.523	7.49246e-34	ILCs	Cox7a2
Sap18	9.00165e-38	0.280226	0.553	0.388	8.91253e-34	ILCs	Sap18
Lgmn.1	1.18979e-37	-0.633352	0.014	0.124	1.17801e-33	ILCs	Lgmn
Gatad2a	1.38771e-37	0.268504	0.271	0.146	1.37397e-33	ILCs	Gatad2a
Tnfrsf13c.1	1.42041e-37	-0.498742	0.018	0.131	1.40635e-33	ILCs	Tnfrsf13c
Ndufb7	2.75558e-37	0.271041	0.541	0.374	2.7283e-33	ILCs	Ndufb7
Abca2	3.49563e-37	0.258175	0.131	0.053	3.46102e-33	ILCs	Abca2
Ndufv3.1	3.82301e-37	0.268498	0.504	0.339	3.78516e-33	ILCs	Ndufv3
Ran	4.12669e-37	0.292734	0.512	0.351	4.08584e-33	ILCs	Ran
Itpkb.1	4.37566e-37	0.256435	0.372	0.223	4.33235e-33	ILCs	Itpkb
Dock10	7.76369e-37	0.2907	0.406	0.254	7.68683e-33	ILCs	Dock10
Gm2a.1	9.68681e-37	-0.508758	0.07	0.199	9.59091e-33	ILCs	Gm2a
Sdf4	1.01656e-36	0.277231	0.438	0.283	1.00649e-32	ILCs	Sdf4
Chchd10.1	1.3638e-36	-0.499787	0.05	0.172	1.3503e-32	ILCs	Chchd10
Rora.1	1.87229e-36	0.416003	0.186	0.087	1.85376e-32	ILCs	Rora
Adrm1	4.86236e-36	0.254159	0.264	0.143	4.81422e-32	ILCs	Adrm1
Trim25.1	1.00481e-35	-0.522854	0.061	0.188	9.94865e-32	ILCs	Trim25
Srp14	1.00559e-35	0.256102	0.53	0.365	9.95634e-32	ILCs	Srp14
Adgre5.1	2.44516e-35	0.26456	0.614	0.442	2.42096e-31	ILCs	Adgre5
Maff	5.63275e-35	0.308218	0.246	0.132	5.57699e-31	ILCs	Maff
Serbp1	5.6761e-35	0.265393	0.673	0.512	5.61991e-31	ILCs	Serbp1
Tmem30a	6.24836e-35	0.258115	0.275	0.153	6.1865e-31	ILCs	Tmem30a
Rbpj	7.53141e-35	0.315249	0.158	0.071	7.45685e-31	ILCs	Rbpj
Gm26532.1	2.96368e-34	0.327343	0.28	0.157	2.93434e-30	ILCs	Gm26532
Rnf187	3.13519e-34	0.272623	0.458	0.304	3.10416e-30	ILCs	Rnf187
Prrc2b	5.26998e-34	0.251678	0.292	0.168	5.21781e-30	ILCs	Prrc2b
Rpl15.1	5.93015e-34	-0.253578	0.891	0.862	5.87144e-30	ILCs	Rpl15
Rassf3.1	1.15614e-33	-0.484931	0.026	0.133	1.14469e-29	ILCs	Rassf3
Psmb9	2.26028e-33	0.26819	0.477	0.322	2.2379e-29	ILCs	Psmb9
Wfdc17.1	3.7881e-33	-0.944099	0.009	0.105	3.7506e-29	ILCs	Wfdc17
Alox5ap.1	4.52124e-33	-0.883045	0.013	0.11	4.47648e-29	ILCs	Alox5ap
Ifngr2	1.34482e-32	-0.402419	0.009	0.104	1.33151e-28	ILCs	Ifngr2
Bmyc.1	1.37153e-32	-0.377778	0.029	0.134	1.35795e-28	ILCs	Bmyc
Mpeg1.1	1.71321e-32	-0.742962	0.008	0.102	1.69625e-28	ILCs	Mpeg1
Rpl12.1	2.0527e-32	-0.277706	0.904	0.87	2.03237e-28	ILCs	Rpl12
Rassf5	3.80102e-32	0.250081	0.323	0.194	3.76339e-28	ILCs	Rassf5
Fgfr1op.1	4.35952e-32	-0.44555	0.02	0.119	4.31636e-28	ILCs	Fgfr1op
Sertad1	4.89833e-32	0.320328	0.355	0.223	4.84984e-28	ILCs	Sertad1
Fcgr2b.1	7.95207e-32	-0.387388	0.016	0.113	7.87334e-28	ILCs	Fcgr2b
Tsc22d4	9.86966e-32	0.280849	0.435	0.294	9.77195e-28	ILCs	Tsc22d4
Ifi47.1	2.77427e-31	0.25942	0.224	0.121	2.7468e-27	ILCs	Ifi47
Il6ra	2.86944e-31	-0.397868	0.014	0.107	2.84103e-27	ILCs	Il6ra
Stk17b.1	2.99651e-31	-0.341093	0.748	0.785	2.96685e-27	ILCs	Stk17b
Plekhj1	4.15805e-31	0.25307	0.406	0.266	4.11688e-27	ILCs	Plekhj1
mt-Nd4l	4.79375e-31	-0.250026	0.867	0.858	4.74629e-27	ILCs	mt-Nd4l
Ubald2	5.71416e-31	0.266931	0.568	0.41	5.65759e-27	ILCs	Ubald2
Plk2.1	5.81368e-31	-0.541104	0.032	0.133	5.75613e-27	ILCs	Plk2
Rpn1	6.56993e-31	0.270447	0.245	0.137	6.50489e-27	ILCs	Rpn1
Rhob.1	1.71265e-30	0.348834	0.516	0.37	1.6957e-26	ILCs	Rhob
Gpr183	1.91171e-30	-0.420924	0.114	0.241	1.89279e-26	ILCs	Gpr183
AB124611.1	2.62338e-30	-0.407677	0.113	0.235	2.59741e-26	ILCs	AB124611
Eif3f	5.42762e-30	-0.266996	0.725	0.748	5.37389e-26	ILCs	Eif3f
Cuta	6.71189e-30	0.258119	0.359	0.231	6.64545e-26	ILCs	Cuta
Sdc4.1	1.19587e-29	-0.506656	0.033	0.134	1.18403e-25	ILCs	Sdc4
Pxk.1	1.54654e-29	-0.487506	0.084	0.195	1.53123e-25	ILCs	Pxk
Blvrb.1	1.67744e-29	-0.355276	0.028	0.126	1.66083e-25	ILCs	Blvrb
Nr3c1	2.46671e-29	0.264797	0.288	0.172	2.44229e-25	ILCs	Nr3c1
Hpcal1	3.09675e-29	0.260305	0.214	0.118	3.06609e-25	ILCs	Hpcal1
Rpl31	3.55483e-29	-0.300366	0.733	0.753	3.51964e-25	ILCs	Rpl31
Ttc39b	9.6152e-29	0.256024	0.184	0.095	9.52e-25	ILCs	Ttc39b
Treml2.1	1.13705e-28	-0.412549	0.019	0.109	1.12579e-24	ILCs	Treml2
Pik3ip1	2.76414e-28	-0.498108	0.053	0.155	2.73678e-24	ILCs	Pik3ip1
Nap1l1.1	7.10914e-28	-0.444307	0.261	0.381	7.03876e-24	ILCs	Nap1l1
Ptger4	1.24688e-27	0.267326	0.194	0.102	1.23453e-23	ILCs	Ptger4
Actn4	4.48322e-27	0.252698	0.285	0.174	4.43884e-23	ILCs	Actn4
Pold4.1	5.04191e-27	-0.463889	0.166	0.278	4.99199e-23	ILCs	Pold4
Man1a.1	5.46386e-27	-0.443864	0.085	0.193	5.40977e-23	ILCs	Man1a
Ifitm3.1	6.00821e-27	-1.19992	0.024	0.111	5.94873e-23	ILCs	Ifitm3
Sgms1	1.07481e-26	-0.434387	0.074	0.181	1.06417e-22	ILCs	Sgms1
Erp29.1	1.83725e-26	-0.412068	0.237	0.349	1.81906e-22	ILCs	Erp29
Hvcn1.1	2.9852e-26	-0.570848	0.127	0.232	2.95565e-22	ILCs	Hvcn1
Tcf4.1	5.60482e-26	-0.645391	0.063	0.163	5.54933e-22	ILCs	Tcf4
Plac8.1	9.64928e-26	-0.779931	0.332	0.424	9.55375e-22	ILCs	Plac8
mt-Nd5.1	1.81247e-25	-0.27632	0.744	0.769	1.79452e-21	ILCs	mt-Nd5
Arl5c	1.97953e-25	-0.35346	0.036	0.126	1.95994e-21	ILCs	Arl5c
mt-Nd3.1	2.42772e-25	-0.424334	0.311	0.427	2.40368e-21	ILCs	mt-Nd3
Slamf6	2.70816e-25	-0.339756	0.024	0.108	2.68135e-21	ILCs	Slamf6
Lyn.1	4.19736e-25	-0.446207	0.112	0.217	4.15581e-21	ILCs	Lyn
Id3.1	7.32489e-25	-0.504658	0.034	0.121	7.25238e-21	ILCs	Id3
Fchsd2.1	1.07822e-24	-0.440974	0.065	0.161	1.06755e-20	ILCs	Fchsd2
Smim14.1	2.73596e-24	-0.446345	0.211	0.313	2.70887e-20	ILCs	Smim14
Swap70.1	8.84437e-24	-0.429723	0.064	0.156	8.75681e-20	ILCs	Swap70
Gramd3.1	1.00211e-23	-0.455581	0.095	0.197	9.92192e-20	ILCs	Gramd3
Sesn1.1	1.58226e-23	-0.491329	0.17	0.274	1.5666e-19	ILCs	Sesn1
Dmxl1.1	2.62305e-23	-0.423945	0.077	0.173	2.59708e-19	ILCs	Dmxl1
Snx2.1	3.05832e-23	-0.39875	0.113	0.213	3.02804e-19	ILCs	Snx2
Klf3	2.68923e-22	-0.377022	0.174	0.282	2.6626e-18	ILCs	Klf3
Sp140.1	2.89684e-22	-0.356674	0.09	0.185	2.86816e-18	ILCs	Sp140
Marcksl1.1	8.70791e-22	-0.463809	0.039	0.12	8.6217e-18	ILCs	Marcksl1
Ero1lb.1	9.88915e-22	-0.405279	0.072	0.161	9.79124e-18	ILCs	Ero1lb
Trib1.1	1.0384e-21	-0.460323	0.039	0.119	1.02812e-17	ILCs	Trib1
Cd8b1.1	1.19647e-21	-0.541572	0.065	0.155	1.18462e-17	ILCs	Cd8b1
Baz2b.1	2.03814e-21	-0.365658	0.075	0.165	2.01796e-17	ILCs	Baz2b
Tgif1	2.47638e-21	-0.391513	0.093	0.187	2.45186e-17	ILCs	Tgif1
Prkcd.1	8.4546e-21	-0.43061	0.086	0.177	8.3709e-17	ILCs	Prkcd
Zfp36l1.1	9.1641e-21	-0.378913	0.441	0.519	9.07338e-17	ILCs	Zfp36l1
Cxcl2.1	2.35899e-20	-1.87623	0.035	0.108	2.33563e-16	ILCs	Cxcl2
Lyz2.1	3.26388e-20	-2.09517	0.078	0.16	3.23157e-16	ILCs	Lyz2
Mif4gd.1	5.69517e-20	-0.382139	0.103	0.191	5.63879e-16	ILCs	Mif4gd
Cyth1.1	1.10854e-19	-0.434301	0.149	0.242	1.09757e-15	ILCs	Cyth1
Nrm.1	1.49739e-19	-0.309824	0.05	0.128	1.48257e-15	ILCs	Nrm
Grk6	1.53481e-19	-0.334075	0.157	0.255	1.51961e-15	ILCs	Grk6
Gns.1	1.70234e-19	-0.375451	0.087	0.173	1.68549e-15	ILCs	Gns
Fth1.1	3.39229e-19	-0.308058	0.962	0.963	3.3587e-15	ILCs	Fth1
Cd37.1	5.62804e-18	-0.448592	0.54	0.553	5.57232e-14	ILCs	Cd37
Irf5.1	6.76675e-18	-0.264016	0.041	0.112	6.69976e-14	ILCs	Irf5
Gngt2.1	8.99715e-18	-0.383202	0.088	0.169	8.90808e-14	ILCs	Gngt2
Sypl.1	9.27166e-18	-0.319741	0.061	0.136	9.17987e-14	ILCs	Sypl
4930523C07Rik	1.19027e-17	-0.325248	0.251	0.343	1.17849e-13	ILCs	4930523C07Rik
Kdm7a	1.27909e-17	-0.381214	0.116	0.201	1.26643e-13	ILCs	Kdm7a
Tspan13.1	3.43996e-17	-0.378457	0.209	0.296	3.40591e-13	ILCs	Tspan13
Rasa3	3.79512e-17	-0.319315	0.12	0.204	3.75755e-13	ILCs	Rasa3
Pmf1.1	4.73298e-17	-0.321935	0.061	0.133	4.68612e-13	ILCs	Pmf1
Irs2.1	6.25871e-17	-0.528005	0.253	0.337	6.19675e-13	ILCs	Irs2
Camk2d.1	7.53262e-17	-0.342115	0.12	0.203	7.45804e-13	ILCs	Camk2d
Filip1l.1	7.98134e-17	-0.277462	0.047	0.116	7.90233e-13	ILCs	Filip1l
Il10ra.1	1.05602e-16	-0.327734	0.115	0.196	1.04557e-12	ILCs	Il10ra
Foxo1.1	1.5647e-16	-0.425057	0.215	0.3	1.54921e-12	ILCs	Foxo1
Ripor2	2.95668e-16	-0.357441	0.226	0.308	2.92741e-12	ILCs	Ripor2
Bri3.1	4.75037e-16	-0.391813	0.273	0.347	4.70334e-12	ILCs	Bri3
Cfap43.1	5.22721e-16	-0.360111	0.095	0.17	5.17546e-12	ILCs	Cfap43
Map3k1.1	9.48088e-16	-0.39395	0.081	0.153	9.38702e-12	ILCs	Map3k1
Parp1.1	1.03424e-15	-0.296209	0.072	0.145	1.024e-11	ILCs	Parp1
Notch2.1	1.06679e-15	-0.327387	0.048	0.113	1.05622e-11	ILCs	Notch2
Inpp5d.1	1.50791e-15	-0.398298	0.324	0.394	1.49298e-11	ILCs	Inpp5d
Ncf2.1	2.7503e-15	-0.354571	0.075	0.144	2.72307e-11	ILCs	Ncf2
Smap2.1	5.40899e-15	-0.321778	0.238	0.318	5.35544e-11	ILCs	Smap2
Snx5.1	6.64198e-15	-0.39017	0.341	0.404	6.57622e-11	ILCs	Snx5
Irf8.1	7.93377e-15	-0.540784	0.294	0.361	7.85523e-11	ILCs	Irf8
Eef1g	1.03297e-14	-0.26875	0.504	0.547	1.02274e-10	ILCs	Eef1g
Ppdpf.1	1.14398e-14	-0.332631	0.343	0.409	1.13265e-10	ILCs	Ppdpf
Stap1.1	1.55009e-14	-0.34653	0.101	0.171	1.53475e-10	ILCs	Stap1
Irf2bp2.1	2.03087e-14	-0.455645	0.191	0.268	2.01077e-10	ILCs	Irf2bp2
Lmbrd1.1	2.17776e-14	-0.291104	0.06	0.124	2.1562e-10	ILCs	Lmbrd1
Rflnb.1	2.51151e-14	-0.316981	0.072	0.137	2.48665e-10	ILCs	Rflnb
Prkcb.1	2.97734e-14	-0.391206	0.221	0.293	2.94786e-10	ILCs	Prkcb
Gpcpd1.1	1.10805e-13	-0.283811	0.119	0.192	1.09708e-09	ILCs	Gpcpd1
Tmem55b.1	1.16548e-13	-0.334155	0.103	0.172	1.15394e-09	ILCs	Tmem55b
Ssh2	2.32313e-13	-0.304938	0.172	0.247	2.30013e-09	ILCs	Ssh2
Atp1b3.1	2.47579e-13	-0.328544	0.273	0.348	2.45128e-09	ILCs	Atp1b3
Kdm6b.1	7.10766e-13	-0.319175	0.236	0.317	7.0373e-09	ILCs	Kdm6b
Lef1.1	7.5293e-13	-0.324942	0.084	0.149	7.45476e-09	ILCs	Lef1
Cst3.1	2.0975e-12	-0.681489	0.348	0.389	2.07674e-08	ILCs	Cst3
Grb2.1	4.75865e-12	-0.361225	0.216	0.282	4.71154e-08	ILCs	Grb2
Grn.1	5.09383e-12	-0.401363	0.048	0.101	5.0434e-08	ILCs	Grn
Ets2.1	5.40398e-12	-0.376206	0.063	0.121	5.35048e-08	ILCs	Ets2
Rilpl2.1	1.17957e-11	-0.302292	0.103	0.167	1.16789e-07	ILCs	Rilpl2
Tmod3.1	1.1946e-11	-0.311842	0.169	0.236	1.18277e-07	ILCs	Tmod3
Zfp318.1	1.31826e-11	-0.312948	0.07	0.127	1.30521e-07	ILCs	Zfp318
Arap1.1	1.71911e-11	-0.259521	0.062	0.118	1.7021e-07	ILCs	Arap1
Atp2b1.1	2.58186e-11	-0.393908	0.242	0.306	2.5563e-07	ILCs	Atp2b1
Rps12-ps3	2.61127e-11	-0.265999	0.248	0.318	2.58542e-07	ILCs	Rps12-ps3
Psap.1	2.92893e-11	-0.911306	0.465	0.483	2.89993e-07	ILCs	Psap
Atp6v0b.1	3.37664e-11	-0.310041	0.297	0.354	3.34322e-07	ILCs	Atp6v0b
Rps27rt	6.0601e-11	-0.263434	0.298	0.362	6.00011e-07	ILCs	Rps27rt
Add3.1	6.54267e-11	-0.279128	0.168	0.232	6.4779e-07	ILCs	Add3
Msrb1.1	7.28175e-11	-0.586085	0.084	0.138	7.20967e-07	ILCs	Msrb1
Clic4.1	8.01876e-11	-0.280687	0.084	0.14	7.93938e-07	ILCs	Clic4
Adrb2.1	2.47445e-10	-0.270204	0.084	0.139	2.44995e-06	ILCs	Adrb2
Macf1.1	2.52104e-10	-0.290945	0.352	0.404	2.49609e-06	ILCs	Macf1
Uvrag.1	2.8992e-10	-0.288534	0.138	0.198	2.87049e-06	ILCs	Uvrag
Rgs10.1	4.95771e-10	-0.262405	0.105	0.161	4.90863e-06	ILCs	Rgs10
Zeb2.1	6.25419e-10	-0.339084	0.108	0.164	6.19228e-06	ILCs	Zeb2
Cerk.1	7.00457e-10	-0.299639	0.117	0.172	6.93522e-06	ILCs	Cerk
Flna	7.18356e-10	-0.267107	0.251	0.312	7.11245e-06	ILCs	Flna
Ly6e.1	1.9155e-09	-0.304119	0.752	0.717	1.89653e-05	ILCs	Ly6e
Egln2.1	2.44696e-09	-0.357579	0.136	0.191	2.42274e-05	ILCs	Egln2
Hmgn1.1	2.86744e-09	-0.259819	0.331	0.379	2.83905e-05	ILCs	Hmgn1
Yeats4.1	5.02476e-09	-0.257227	0.174	0.232	4.97502e-05	ILCs	Yeats4
Ddx6	5.09638e-09	-0.270793	0.235	0.295	5.04593e-05	ILCs	Ddx6
Dnajc7.1	7.47191e-09	-0.30573	0.206	0.256	7.39793e-05	ILCs	Dnajc7
Tcp11l2	7.47885e-09	-0.287421	0.145	0.2	7.40481e-05	ILCs	Tcp11l2
Aff4	1.32211e-08	-0.290407	0.225	0.279	0.000130902	ILCs	Aff4
Ptp4a3.1	2.46675e-08	-0.311002	0.295	0.334	0.000244233	ILCs	Ptp4a3
Crlf3	1.17521e-07	-0.269087	0.188	0.236	0.00116357	ILCs	Crlf3
Arhgap17.1	6.07381e-07	-0.266182	0.151	0.194	0.00601368	ILCs	Arhgap17
Gdi2.1	8.62349e-07	-0.253731	0.404	0.43	0.00853812	ILCs	Gdi2
Atf3.1	8.71352e-07	-0.374414	0.16	0.205	0.00862726	ILCs	Atf3
Smad7	1.04978e-06	-0.288025	0.345	0.377	0.0103938	ILCs	Smad7
Abhd17b.1	1.43206e-06	-0.255611	0.149	0.192	0.0141788	ILCs	Abhd17b
Mcl1.1	1.47538e-06	-0.296951	0.422	0.453	0.0146077	ILCs	Mcl1
Jmjd1c.1	2.27403e-06	-0.276633	0.196	0.241	0.0225151	ILCs	Jmjd1c
Myc.1	3.35502e-06	-0.273965	0.125	0.165	0.033218	ILCs	Myc
Gpx1.1	4.58225e-06	-0.252411	0.512	0.539	0.0453689	ILCs	Gpx1
Cd79a.2	0	3.1043	0.96	0.058	0	B cells	Cd79a
Cd74.2	0	2.89084	0.999	0.29	0	B cells	Cd74
Igkc.2	0	2.64871	0.907	0.118	0	B cells	Igkc
Iglc2.2	0	2.54154	0.778	0.042	0	B cells	Iglc2
H2-Aa.2	0	2.48374	0.982	0.159	0	B cells	H2-Aa
Ebf1.2	0	2.47804	0.864	0.034	0	B cells	Ebf1
H2-Eb1.2	0	2.43936	0.96	0.13	0	B cells	H2-Eb1
H2-Ab1.2	0	2.20475	0.978	0.135	0	B cells	H2-Ab1
Cd79b.2	0	2.17325	0.744	0.05	0	B cells	Cd79b
Ly6d.2	0	2.15698	0.715	0.056	0	B cells	Ly6d
H2-DMb2.2	0	2.07784	0.741	0.039	0	B cells	H2-DMb2
Ighm.2	0	2.07523	0.891	0.227	0	B cells	Ighm
Ighd.2	0	1.99409	0.681	0.031	0	B cells	Ighd
Fcmr.2	0	1.77353	0.577	0.019	0	B cells	Fcmr
H2-Ob.2	0	1.73186	0.626	0.038	0	B cells	H2-Ob
Ms4a1.2	0	1.72347	0.591	0.022	0	B cells	Ms4a1
Iglc3.2	0	1.68564	0.575	0.046	0	B cells	Iglc3
Scd1.2	0	1.65059	0.505	0.022	0	B cells	Scd1
Cd83.2	0	1.63565	0.643	0.086	0	B cells	Cd83
Mef2c.2	0	1.53105	0.676	0.107	0	B cells	Mef2c
Cd19.2	0	1.52604	0.531	0.018	0	B cells	Cd19
Bank1.2	0	1.52374	0.527	0.026	0	B cells	Bank1
Ralgps2.2	0	1.44799	0.575	0.089	0	B cells	Ralgps2
H2-DMa.2	0	1.40418	0.686	0.164	0	B cells	H2-DMa
Fcer2a.2	0	1.38064	0.423	0.016	0	B cells	Fcer2a
Cd55.2	0	1.28815	0.5	0.092	0	B cells	Cd55
H2-Oa.2	0	1.287	0.469	0.048	0	B cells	H2-Oa
Mzb1.2	0	1.2771	0.433	0.035	0	B cells	Mzb1
Vpreb3.2	0	1.18138	0.326	0.011	0	B cells	Vpreb3
Hvcn1.2	0	1.17774	0.424	0.07	0	B cells	Hvcn1
Gm30211.2	0	1.17139	0.3	0.012	0	B cells	Gm30211
Pax5.2	0	1.1471	0.343	0.013	0	B cells	Pax5
Napsa.2	0	1.14267	0.575	0.153	0	B cells	Napsa
Irf4.2	0	1.13601	0.294	0.049	0	B cells	Irf4
Blk.2	0	1.1062	0.361	0.015	0	B cells	Blk
Cd37.2	0	1.08319	0.722	0.419	0	B cells	Cd37
Fcrla.2	0	1.07059	0.356	0.023	0	B cells	Fcrla
Syk.2	0	1.06701	0.602	0.178	0	B cells	Syk
Cd24a.2	0	1.05975	0.434	0.061	0	B cells	Cd24a
Irs2.2	0	1.05448	0.478	0.219	0	B cells	Irs2
Foxp1.2	0	1.03587	0.744	0.398	0	B cells	Foxp1
Cd22.2	0	1.01753	0.318	0.012	0	B cells	Cd22
B3gnt5.2	0	1.01653	0.335	0.046	0	B cells	B3gnt5
Pkig.2	0	1.00659	0.399	0.07	0	B cells	Pkig
Snn.2	0	0.997346	0.323	0.026	0	B cells	Snn
Ccr7.1	0	0.98479	0.751	0.29	0	B cells	Ccr7
Siglecg.2	0	0.978844	0.321	0.023	0	B cells	Siglecg
H2-DMb1.2	0	0.973835	0.385	0.07	0	B cells	H2-DMb1
Serp1.2	0	0.967993	0.701	0.351	0	B cells	Serp1
Iglc1.2	0	0.944641	0.249	0.014	0	B cells	Iglc1
Blnk.2	0	0.933695	0.354	0.047	0	B cells	Blnk
H3f3a.2	0	0.922901	0.886	0.769	0	B cells	H3f3a
Tnfrsf13c.2	0	0.910526	0.263	0.017	0	B cells	Tnfrsf13c
Pou2f2.2	0	0.909921	0.435	0.124	0	B cells	Pou2f2
Sesn1.2	0	0.898326	0.414	0.154	0	B cells	Sesn1
Ly6e.2	0	0.891602	0.836	0.626	0	B cells	Ly6e
Bach2.2	0	0.86882	0.378	0.13	0	B cells	Bach2
Ly86.2	0	0.859539	0.439	0.103	0	B cells	Ly86
Fam43a.2	0	0.859402	0.263	0.026	0	B cells	Fam43a
Swap70.2	0	0.858423	0.294	0.039	0	B cells	Swap70
Cd81.2	0	0.837108	0.296	0.028	0	B cells	Cd81
Pold4.2	0	0.836715	0.411	0.163	0	B cells	Pold4
Fchsd2.2	0	0.835225	0.285	0.055	0	B cells	Fchsd2
Pxk.2	0	0.818326	0.322	0.085	0	B cells	Pxk
Chchd10.2	0	0.802336	0.296	0.062	0	B cells	Chchd10
Dmxl1.2	0	0.785469	0.288	0.074	0	B cells	Dmxl1
Tsc22d3.1	0	0.784741	0.902	0.713	0	B cells	Tsc22d3
Zfp36l1.2	0	0.780173	0.672	0.392	0	B cells	Zfp36l1
Btla.2	0	0.769318	0.226	0.029	0	B cells	Btla
Chst3.1	0	0.763109	0.196	0.01	0	B cells	Chst3
Serpinb1a.2	0	0.760945	0.24	0.025	0	B cells	Serpinb1a
Inpp5d.2	0	0.760154	0.527	0.282	0	B cells	Inpp5d
Ptp4a3.2	0	0.7514	0.465	0.228	0	B cells	Ptp4a3
Rel.2	0	0.747262	0.475	0.225	0	B cells	Rel
Smim14.2	0	0.736574	0.439	0.203	0	B cells	Smim14
Snx8.1	0	0.733809	0.194	0.018	0	B cells	Snx8
Pou2af1.2	0	0.725822	0.215	0.009	0	B cells	Pou2af1
Ero1lb.2	0	0.71805	0.264	0.071	0	B cells	Ero1lb
Lmo2.2	0	0.717992	0.234	0.035	0	B cells	Lmo2
Zfp318.2	0	0.702802	0.224	0.045	0	B cells	Zfp318
Eif2ak3.1	0	0.701126	0.245	0.081	0	B cells	Eif2ak3
Myc.2	0	0.70045	0.256	0.09	0	B cells	Myc
Fcrl1.1	0	0.700347	0.196	0.008	0	B cells	Fcrl1
Unc93b1.2	0	0.684771	0.481	0.177	0	B cells	Unc93b1
Stap1.2	0	0.680318	0.27	0.087	0	B cells	Stap1
Snx2.2	0	0.679025	0.319	0.119	0	B cells	Snx2
Cd72.2	0	0.678221	0.259	0.095	0	B cells	Cd72
Plaur.2	0	0.677527	0.392	0.145	0	B cells	Plaur
Mtss1.2	0	0.670661	0.241	0.062	0	B cells	Mtss1
Wdfy4.2	0	0.668769	0.227	0.039	0	B cells	Wdfy4
Gm8369.1	0	0.665942	0.457	0.249	0	B cells	Gm8369
Prkcb.2	0	0.659936	0.402	0.2	0	B cells	Prkcb
Bcl11a.2	0	0.654546	0.22	0.034	0	B cells	Bcl11a
Man1a.2	0	0.649453	0.288	0.108	0	B cells	Man1a
Sh3bp5.2	0	0.648195	0.314	0.125	0	B cells	Sh3bp5
Plk2.2	0	0.647572	0.209	0.064	0	B cells	Plk2
Snx9.2	0	0.647201	0.231	0.048	0	B cells	Snx9
Ciita.1	0	0.63952	0.182	0.016	0	B cells	Ciita
Mif4gd.2	0	0.632549	0.285	0.109	0	B cells	Mif4gd
Lrrk2.1	0	0.631519	0.178	0.017	0	B cells	Lrrk2
Ppdpf.2	0	0.627958	0.509	0.325	0	B cells	Ppdpf
Pmf1.2	0	0.626841	0.231	0.049	0	B cells	Pmf1
Snx5.2	0	0.62449	0.5	0.323	0	B cells	Snx5
Cerk.2	0	0.623633	0.263	0.095	0	B cells	Cerk
Cd180.2	0	0.622985	0.188	0.035	0	B cells	Cd180
Trp53i11.1	0	0.611243	0.259	0.088	0	B cells	Trp53i11
Birc3.2	0	0.609067	0.391	0.204	0	B cells	Birc3
St6gal1.2	0	0.607019	0.223	0.062	0	B cells	St6gal1
Dok3.2	0	0.604279	0.225	0.049	0	B cells	Dok3
Hmgn1.2	0	0.604136	0.481	0.294	0	B cells	Hmgn1
Fgfr1op.2	0	0.600556	0.198	0.048	0	B cells	Fgfr1op
Pgap1.1	0	0.598992	0.163	0.02	0	B cells	Pgap1
Klf2.2	0	0.595077	0.906	0.76	0	B cells	Klf2
Cxcr4.2	0	0.589309	0.462	0.262	0	B cells	Cxcr4
Spib.2	0	0.586052	0.201	0.031	0	B cells	Spib
Ctsh.2	0	0.583707	0.37	0.121	0	B cells	Ctsh
Gm15987.2	0	0.580762	0.216	0.046	0	B cells	Gm15987
Hs3st1.1	0	0.578236	0.16	0.019	0	B cells	Hs3st1
Stk17b.2	0	0.570314	0.857	0.724	0	B cells	Stk17b
Capg.2	0	0.555212	0.328	0.131	0	B cells	Capg
Trim7	0	0.552867	0.134	0.006	0	B cells	Trim7
Gga2.1	0	0.544256	0.162	0.013	0	B cells	Gga2
Blvrb.2	0	0.541997	0.206	0.054	0	B cells	Blvrb
March1.1	0	0.531015	0.16	0.028	0	B cells	March1
Rab30	0	0.526103	0.128	0.005	0	B cells	Rab30
Cnn3	0	0.522394	0.146	0.016	0	B cells	Cnn3
Rasgrp3	0	0.52088	0.123	0.006	0	B cells	Rasgrp3
Tnfrsf13b.2	0	0.509602	0.201	0.058	0	B cells	Tnfrsf13b
Cd40.1	0	0.5067	0.149	0.018	0	B cells	Cd40
Cr2	0	0.49811	0.127	0.004	0	B cells	Cr2
mt-Nd2.2	0	0.496667	0.966	0.901	0	B cells	mt-Nd2
mt-Nd5.2	0	0.481126	0.826	0.722	0	B cells	mt-Nd5
Cxcr5	0	0.480314	0.135	0.008	0	B cells	Cxcr5
Dennd5b	0	0.466073	0.13	0.016	0	B cells	Dennd5b
mt-Nd1.2	0	0.449202	0.98	0.924	0	B cells	mt-Nd1
mt-Nd4l.1	0	0.445829	0.896	0.828	0	B cells	mt-Nd4l
Bcar3	0	0.412308	0.103	0.006	0	B cells	Bcar3
mt-Atp8	0	0.405143	0.957	0.921	0	B cells	mt-Atp8
H2-Eb2	0	0.400335	0.104	0.005	0	B cells	H2-Eb2
Rps19.1	0	0.385653	0.985	0.937	0	B cells	Rps19
Fau.1	0	0.377846	0.995	0.99	0	B cells	Fau
mt-Cytb.1	0	0.363016	0.98	0.941	0	B cells	mt-Cytb
Rps27.1	0	0.354629	0.997	0.991	0	B cells	Rps27
mt-Co2.1	0	0.34101	0.997	0.983	0	B cells	mt-Co2
Rpl35.1	0	0.333258	0.961	0.923	0	B cells	Rpl35
Ptma.1	0	0.327381	0.958	0.921	0	B cells	Ptma
Rps20.1	0	0.324297	0.995	0.963	0	B cells	Rps20
mt-Co3.1	0	0.303164	0.997	0.982	0	B cells	mt-Co3
Rpl21.1	0	0.29401	0.935	0.899	0	B cells	Rpl21
Rpl18a.1	0	0.281865	0.976	0.952	0	B cells	Rpl18a
mt-Co1.1	0	0.267729	1	0.994	0	B cells	mt-Co1
B2m.1	0	-0.348266	0.923	0.97	0	B cells	B2m
H2-D1.1	0	-0.380918	0.921	0.973	0	B cells	H2-D1
Tnfrsf1a	0	-0.394455	0.007	0.126	0	B cells	Tnfrsf1a
Cmc1	0	-0.403792	0.059	0.221	0	B cells	Cmc1
H2-K1.2	0	-0.408628	0.878	0.944	0	B cells	H2-K1
Sec61b	0	-0.410453	0.491	0.701	0	B cells	Sec61b
Ptpn18.2	0	-0.416212	0.581	0.746	0	B cells	Ptpn18
Arf5	0	-0.418434	0.37	0.609	0	B cells	Arf5
Gm2682.1	0	-0.429041	0.012	0.148	0	B cells	Gm2682
Hpcal1.1	0	-0.430757	0.035	0.192	0	B cells	Hpcal1
Cd27.2	0	-0.431443	0.018	0.157	0	B cells	Cd27
Acot7.1	0	-0.433466	0.018	0.148	0	B cells	Acot7
Actb	0	-0.439152	0.955	0.974	0	B cells	Actb
Ccdc88b	0	-0.441511	0.017	0.145	0	B cells	Ccdc88b
Pla2g16.2	0	-0.444338	0.089	0.264	0	B cells	Pla2g16
Atp1a1	0	-0.449281	0.122	0.318	0	B cells	Atp1a1
Ppm1h.1	0	-0.450364	0.014	0.156	0	B cells	Ppm1h
Tes.2	0	-0.450578	0.101	0.286	0	B cells	Tes
Pik3r5.1	0	-0.457631	0.044	0.197	0	B cells	Pik3r5
Slc3a2.1	0	-0.462266	0.256	0.49	0	B cells	Slc3a2
Fam105a.1	0	-0.46228	0.038	0.213	0	B cells	Fam105a
Fam189b.2	0	-0.468502	0.038	0.208	0	B cells	Fam189b
Myl12a.1	0	-0.470614	0.374	0.602	0	B cells	Myl12a
Actn1.1	0	-0.482541	0.023	0.162	0	B cells	Actn1
Gtf2i.1	0	-0.487019	0.063	0.235	0	B cells	Gtf2i
Gata3.2	0	-0.490459	0.016	0.142	0	B cells	Gata3
Abracl.1	0	-0.492232	0.235	0.473	0	B cells	Abracl
Crip1	0	-0.495419	0.716	0.88	0	B cells	Crip1
Metrnl	0	-0.497834	0.009	0.132	0	B cells	Metrnl
Sh2d1a.1	0	-0.501486	0.018	0.177	0	B cells	Sh2d1a
Ppp1r18.1	0	-0.501995	0.288	0.532	0	B cells	Ppp1r18
Pkm	0	-0.502716	0.242	0.466	0	B cells	Pkm
D16Ertd472e.1	0	-0.503012	0.049	0.213	0	B cells	D16Ertd472e
Arrb2.1	0	-0.510566	0.066	0.262	0	B cells	Arrb2
Slc9a3r1.1	0	-0.510644	0.121	0.333	0	B cells	Slc9a3r1
Prdx6.2	0	-0.511625	0.229	0.478	0	B cells	Prdx6
Hspa8.2	0	-0.514252	0.661	0.832	0	B cells	Hspa8
Psme2.2	0	-0.515915	0.277	0.535	0	B cells	Psme2
Sept1.2	0	-0.521197	0.29	0.508	0	B cells	Sept1
Rnaset2b.1	0	-0.522863	0.12	0.341	0	B cells	Rnaset2b
Fosl2.1	0	-0.524138	0.06	0.233	0	B cells	Fosl2
Ier2.1	0	-0.526009	0.516	0.714	0	B cells	Ier2
Ptpre	0	-0.52904	0.038	0.186	0	B cells	Ptpre
Selenop	0	-0.531419	0.045	0.208	0	B cells	Selenop
Tmsb10.2	0	-0.531461	0.932	0.95	0	B cells	Tmsb10
Ubald2.1	0	-0.532674	0.29	0.52	0	B cells	Ubald2
Bin2.1	0	-0.533962	0.186	0.423	0	B cells	Bin2
Cd6.1	0	-0.537495	0.022	0.173	0	B cells	Cd6
Fasl.1	0	-0.53846	0.012	0.154	0	B cells	Fasl
Vsir.1	0	-0.538644	0.057	0.259	0	B cells	Vsir
Arsb.1	0	-0.543749	0.015	0.155	0	B cells	Arsb
Ptpn22.2	0	-0.545544	0.101	0.301	0	B cells	Ptpn22
Fgl2.1	0	-0.554674	0.02	0.157	0	B cells	Fgl2
Ptprc.1	0	-0.556352	0.585	0.826	0	B cells	Ptprc
Il18rap	0	-0.559497	0.006	0.134	0	B cells	Il18rap
Klk8.2	0	-0.570576	0.03	0.226	0	B cells	Klk8
Itm2c.1	0	-0.571111	0.054	0.258	0	B cells	Itm2c
Ldha.2	0	-0.57381	0.249	0.524	0	B cells	Ldha
Ramp1.1	0	-0.574413	0.014	0.191	0	B cells	Ramp1
Gm19585.1	0	-0.576095	0.038	0.214	0	B cells	Gm19585
Tmsb4x.1	0	-0.576546	0.98	0.994	0	B cells	Tmsb4x
Snx18	0	-0.576881	0.035	0.194	0	B cells	Snx18
Arl6ip5.2	0	-0.578325	0.159	0.426	0	B cells	Arl6ip5
Prkcq.1	0	-0.581778	0.017	0.206	0	B cells	Prkcq
Hspa5	0	-0.583674	0.449	0.683	0	B cells	Hspa5
Ccnd3.1	0	-0.59255	0.184	0.422	0	B cells	Ccnd3
Sema4a.1	0	-0.593725	0.013	0.184	0	B cells	Sema4a
Myo1f.1	0	-0.596828	0.03	0.223	0	B cells	Myo1f
Epsti1.2	0	-0.597166	0.148	0.385	0	B cells	Epsti1
Zfp36l2.1	0	-0.59964	0.56	0.78	0	B cells	Zfp36l2
Txn1.1	0	-0.601052	0.184	0.42	0	B cells	Txn1
Tspo	0	-0.603011	0.323	0.587	0	B cells	Tspo
Dnajc15.2	0	-0.606688	0.095	0.333	0	B cells	Dnajc15
Dusp10.1	0	-0.609332	0.073	0.24	0	B cells	Dusp10
H2-Q7.2	0	-0.615292	0.433	0.661	0	B cells	H2-Q7
Klrc1.1	0	-0.627021	0.009	0.129	0	B cells	Klrc1
S100a10.2	0	-0.629097	0.495	0.673	0	B cells	S100a10
Serpinb9.1	0	-0.632885	0.011	0.148	0	B cells	Serpinb9
Sept9.2	0	-0.634492	0.071	0.313	0	B cells	Sept9
Mrpl33	0	-0.637353	0.209	0.476	0	B cells	Mrpl33
Itm2b.1	0	-0.639041	0.532	0.762	0	B cells	Itm2b
Lcp2.2	0	-0.645138	0.025	0.248	0	B cells	Lcp2
Ugcg.1	0	-0.645465	0.11	0.31	0	B cells	Ugcg
Prex1.1	0	-0.655015	0.081	0.303	0	B cells	Prex1
Sgk1	0	-0.661768	0.046	0.201	0	B cells	Sgk1
Mxd1.1	0	-0.66281	0.06	0.222	0	B cells	Mxd1
S100a13.2	0	-0.664721	0.17	0.451	0	B cells	S100a13
Rinl.2	0	-0.666807	0.037	0.261	0	B cells	Rinl
Serpinb6b.1	0	-0.676016	0.016	0.18	0	B cells	Serpinb6b
Cd9.1	0	-0.679856	0.025	0.177	0	B cells	Cd9
Rgs10.2	0	-0.68231	0.032	0.257	0	B cells	Rgs10
Bhlhe40.1	0	-0.70795	0.217	0.467	0	B cells	Bhlhe40
Lef1.2	0	-0.708553	0.032	0.235	0	B cells	Lef1
Zap70.2	0	-0.710859	0.027	0.252	0	B cells	Zap70
Bcl11b.1	0	-0.712035	0.034	0.251	0	B cells	Bcl11b
Nr4a2.1	0	-0.716836	0.071	0.262	0	B cells	Nr4a2
Dok2.1	0	-0.717	0.022	0.234	0	B cells	Dok2
Klrb1c.1	0	-0.719268	0.004	0.127	0	B cells	Klrb1c
Itgb1.1	0	-0.721521	0.098	0.329	0	B cells	Itgb1
Atp1b3.2	0	-0.726638	0.165	0.486	0	B cells	Atp1b3
Ifitm10.1	0	-0.731559	0.016	0.22	0	B cells	Ifitm10
Spn.1	0	-0.751911	0.036	0.271	0	B cells	Spn
Ccnd2.2	0	-0.752715	0.105	0.377	0	B cells	Ccnd2
Cd247.1	0	-0.765425	0.032	0.298	0	B cells	Cd247
Cst7.2	0	-0.765733	0.023	0.251	0	B cells	Cst7
Myl6.1	0	-0.775919	0.632	0.876	0	B cells	Myl6
Rnf149.1	0	-0.777307	0.033	0.176	0	B cells	Rnf149
Cd44.1	0	-0.796139	0.104	0.307	0	B cells	Cd44
Leprotl1.2	0	-0.801818	0.075	0.405	0	B cells	Leprotl1
Ccr2	0	-0.804219	0.015	0.191	0	B cells	Ccr2
Sytl3.1	0	-0.814623	0.021	0.24	0	B cells	Sytl3
Dusp5.2	0	-0.815895	0.159	0.475	0	B cells	Dusp5
Ms4a6b.1	0	-0.816663	0.084	0.389	0	B cells	Ms4a6b
Ctla2a.2	0	-0.824443	0.02	0.22	0	B cells	Ctla2a
Lilr4b	0	-0.831853	0.013	0.152	0	B cells	Lilr4b
Saraf.2	0	-0.832892	0.125	0.482	0	B cells	Saraf
Dusp1.1	0	-0.843758	0.524	0.754	0	B cells	Dusp1
Fyn.1	0	-0.845989	0.083	0.38	0	B cells	Fyn
Klre1.2	0	-0.857735	0.008	0.192	0	B cells	Klre1
Prkch.2	0	-0.859174	0.03	0.315	0	B cells	Prkch
Tcf7.1	0	-0.867178	0.036	0.289	0	B cells	Tcf7
Klrk1.1	0	-0.869568	0.013	0.217	0	B cells	Klrk1
Arl4c.1	0	-0.875438	0.038	0.335	0	B cells	Arl4c
Il7r.1	0	-0.878573	0.036	0.29	0	B cells	Il7r
Txk.2	0	-0.890183	0.036	0.321	0	B cells	Txk
Tnfaip3.2	0	-0.893621	0.415	0.81	0	B cells	Tnfaip3
Ifng.2	0	-0.898179	0.022	0.223	0	B cells	Ifng
Cd8a.2	0	-0.901545	0.033	0.225	0	B cells	Cd8a
Npc2.2	0	-0.902702	0.284	0.633	0	B cells	Npc2
Ncr1.2	0	-0.903446	0.003	0.153	0	B cells	Ncr1
Nfkbiz	0	-0.928222	0.107	0.338	0	B cells	Nfkbiz
Lgals3.2	0	-0.93227	0.067	0.24	0	B cells	Lgals3
Actg1.1	0	-0.93652	0.689	0.917	0	B cells	Actg1
Ahnak.1	0	-0.946989	0.216	0.567	0	B cells	Ahnak
Itgal.1	0	-0.947272	0.115	0.45	0	B cells	Itgal
Trac.1	0	-0.952758	0.041	0.328	0	B cells	Trac
Zyx.1	0	-0.966247	0.088	0.42	0	B cells	Zyx
Ccrl2.2	0	-0.970115	0.015	0.147	0	B cells	Ccrl2
Sh2d2a.2	0	-0.973055	0.074	0.369	0	B cells	Sh2d2a
Efhd2.2	0	-0.97714	0.088	0.417	0	B cells	Efhd2
Itgb2.1	0	-0.989357	0.106	0.458	0	B cells	Itgb2
Pim1.1	0	-0.992734	0.296	0.592	0	B cells	Pim1
Skap1.2	0	-0.999476	0.048	0.404	0	B cells	Skap1
Itk.2	0	-1.00389	0.044	0.376	0	B cells	Itk
Ctsb.2	0	-1.03182	0.117	0.337	0	B cells	Ctsb
Xcl1.1	0	-1.074	0.02	0.193	0	B cells	Xcl1
Trbc1.2	0	-1.07748	0.034	0.319	0	B cells	Trbc1
Nfkbia	0	-1.08931	0.456	0.715	0	B cells	Nfkbia
Emb.1	0	-1.094	0.072	0.423	0	B cells	Emb
Cd8b1.2	0	-1.09529	0.033	0.242	0	B cells	Cd8b1
Ifngr1.2	0	-1.10422	0.185	0.61	0	B cells	Ifngr1
Cd28.1	0	-1.1299	0.045	0.371	0	B cells	Cd28
Prf1.1	0	-1.13027	0.013	0.212	0	B cells	Prf1
H2afz	0	-1.13146	0.349	0.706	0	B cells	H2afz
Alox5ap.2	0	-1.13269	0.024	0.169	0	B cells	Alox5ap
Thy1.2	0	-1.14631	0.049	0.384	0	B cells	Thy1
S100a4.1	0	-1.14806	0.043	0.273	0	B cells	S100a4
Rgs1.1	0	-1.1981	0.227	0.506	0	B cells	Rgs1
Fyb.1	0	-1.19869	0.047	0.496	0	B cells	Fyb
Klrd1.1	0	-1.21181	0.028	0.338	0	B cells	Klrd1
Ctsd.1	0	-1.2255	0.079	0.49	0	B cells	Ctsd
Anxa2.2	0	-1.24436	0.055	0.383	0	B cells	Anxa2
Ctsw.1	0	-1.28267	0.036	0.41	0	B cells	Ctsw
Lck.2	0	-1.28443	0.082	0.548	0	B cells	Lck
Fxyd5.2	0	-1.30554	0.297	0.779	0	B cells	Fxyd5
Lat.1	0	-1.33191	0.067	0.52	0	B cells	Lat
Selplg.2	0	-1.35382	0.141	0.684	0	B cells	Selplg
Ly6c2	0	-1.3713	0.036	0.284	0	B cells	Ly6c2
Ms4a4b.2	0	-1.38464	0.056	0.486	0	B cells	Ms4a4b
Hcst.2	0	-1.40474	0.195	0.685	0	B cells	Hcst
Id2.1	0	-1.43484	0.107	0.539	0	B cells	Id2
Cd3d.2	0	-1.43875	0.072	0.505	0	B cells	Cd3d
Cd3g.2	0	-1.50563	0.07	0.487	0	B cells	Cd3g
Cd3e.2	0	-1.55536	0.073	0.517	0	B cells	Cd3e
Il2rb.1	0	-1.56194	0.046	0.458	0	B cells	Il2rb
Trbc2.2	0	-1.56501	0.07	0.565	0	B cells	Trbc2
Cd7.1	0	-1.56777	0.037	0.348	0	B cells	Cd7
Ccl3.2	0	-1.5968	0.03	0.279	0	B cells	Ccl3
Gzmb.1	0	-1.66566	0.03	0.31	0	B cells	Gzmb
S100a6.1	0	-1.68274	0.142	0.581	0	B cells	S100a6
Lgals1.2	0	-1.68916	0.107	0.523	0	B cells	Lgals1
AW112010.1	0	-2.02976	0.179	0.676	0	B cells	AW112010
Ccl4.2	0	-2.25289	0.056	0.388	0	B cells	Ccl4
Nkg7.2	0	-2.27895	0.065	0.551	0	B cells	Nkg7
Fcer1g.2	0	-2.28385	0.038	0.424	0	B cells	Fcer1g
Tyrobp.2	0	-2.35597	0.106	0.44	0	B cells	Tyrobp
Ccl5.2	0	-2.67277	0.225	0.573	0	B cells	Ccl5
Gzma.2	0	-2.99897	0.042	0.293	0	B cells	Gzma
Cxcr6.2	4.77036e-307	-0.563983	0.02	0.149	4.72313e-303	B cells	Cxcr6
Il18r1	1.98537e-306	-0.471456	0.011	0.13	1.96572e-302	B cells	Il18r1
Snx30.1	7.79769e-306	0.514754	0.164	0.037	7.72049e-302	B cells	Snx30
Rora.2	1.74525e-304	-0.688502	0.021	0.149	1.72797e-300	B cells	Rora
Nfil3.1	1.12541e-303	-0.487629	0.041	0.186	1.11427e-299	B cells	Nfil3
Cited2.2	1.16525e-303	-0.511285	0.091	0.266	1.15371e-299	B cells	Cited2
Smpdl3a	2.34471e-302	-0.486669	0.06	0.216	2.32149e-298	B cells	Smpdl3a
Arhgap9.1	2.36099e-302	-0.458365	0.111	0.296	2.33762e-298	B cells	Arhgap9
Runx3.1	4.06637e-302	-0.474515	0.1	0.279	4.02612e-298	B cells	Runx3
Cops9	5.28841e-302	-0.44051	0.229	0.452	5.23605e-298	B cells	Cops9
Rnf166.1	6.5983e-302	-0.40519	0.067	0.23	6.53297e-298	B cells	Rnf166
Eomes	3.0837e-301	-0.503461	0.004	0.112	3.05317e-297	B cells	Eomes
Cdk2ap2.1	5.22275e-301	-0.494352	0.285	0.509	5.17104e-297	B cells	Cdk2ap2
Cpm	8.03374e-301	0.490087	0.136	0.023	7.9542e-297	B cells	Cpm
A530040E14Rik	3.41373e-299	0.412459	0.108	0.01	3.37993e-295	B cells	A530040E14Rik
Utrn.2	4.58069e-299	-0.422801	0.039	0.183	4.53534e-295	B cells	Utrn
Arpc1b.1	2.02643e-297	-0.452211	0.524	0.706	2.00637e-293	B cells	Arpc1b
Pycard	5.03042e-297	-0.413406	0.101	0.278	4.98062e-293	B cells	Pycard
Atp5h.1	1.28362e-296	-0.385643	0.528	0.724	1.27091e-292	B cells	Atp5h
Hsd11b1	7.53982e-296	-0.424446	0.021	0.148	7.46517e-292	B cells	Hsd11b1
Padi2.1	1.72675e-295	-0.431575	0.021	0.147	1.70966e-291	B cells	Padi2
Cd5.1	9.40274e-295	-0.436118	0.018	0.139	9.30965e-291	B cells	Cd5
Pik3cd.2	1.43174e-294	-0.429953	0.213	0.433	1.41757e-290	B cells	Pik3cd
Klra4	2.236e-294	-0.744487	0.003	0.107	2.21387e-290	B cells	Klra4
Cfl1.1	5.84162e-294	-0.360887	0.727	0.85	5.78379e-290	B cells	Cfl1
Stt3b.2	1.06871e-293	0.691581	0.362	0.194	1.05813e-289	B cells	Stt3b
Higd1a.1	1.8362e-292	-0.430106	0.13	0.319	1.81802e-288	B cells	Higd1a
Cfap43.2	2.64024e-290	0.581065	0.252	0.099	2.6141e-286	B cells	Cfap43
Klra7.1	4.46285e-290	-0.675733	0.004	0.109	4.41867e-286	B cells	Klra7
Notch1	2.05959e-289	-0.421887	0.034	0.171	2.0392e-285	B cells	Notch1
Ifi47.2	4.17621e-289	-0.407724	0.046	0.19	4.13486e-285	B cells	Ifi47
Icos.1	8.7939e-288	-0.504737	0.018	0.139	8.70684e-284	B cells	Icos
Tigit.2	1.69258e-287	-0.467842	0.017	0.135	1.67582e-283	B cells	Tigit
Klra8	2.05561e-287	-0.673456	0.002	0.104	2.03526e-283	B cells	Klra8
Klrb1a.1	3.1901e-287	-0.480719	0.003	0.106	3.15852e-283	B cells	Klrb1a
Rgs3.1	6.26123e-285	-0.414091	0.017	0.136	6.19925e-281	B cells	Rgs3
Rac2.2	3.76059e-284	-0.422172	0.664	0.777	3.72336e-280	B cells	Rac2
Pml.1	7.00632e-284	0.528015	0.202	0.065	6.93695e-280	B cells	Pml
Anxa1.1	1.43512e-281	-0.636727	0.017	0.135	1.42091e-277	B cells	Anxa1
Nrm.2	3.51845e-281	0.507308	0.199	0.064	3.48361e-277	B cells	Nrm
Mpeg1.2	1.85237e-280	-0.920852	0.027	0.152	1.83403e-276	B cells	Mpeg1
Lyn.2	4.31994e-280	0.482876	0.307	0.136	4.27717e-276	B cells	Lyn
Hopx.1	2.2506e-279	-0.447043	0.062	0.213	2.22832e-275	B cells	Hopx
Btk	2.6125e-279	0.40446	0.12	0.018	2.58663e-275	B cells	Btk
Atox1	1.16544e-278	-0.465132	0.242	0.447	1.1539e-274	B cells	Atox1
Serf2.1	1.18366e-278	-0.303984	0.799	0.884	1.17195e-274	B cells	Serf2
Sem1	1.51247e-278	-0.434249	0.589	0.768	1.4975e-274	B cells	Sem1
Atp1b1.1	3.7251e-278	-0.487423	0.035	0.168	3.68822e-274	B cells	Atp1b1
Ets1	7.92765e-278	0.44021	0.724	0.599	7.84916e-274	B cells	Ets1
Rpl26.1	5.8095e-276	0.250628	0.907	0.889	5.75199e-272	B cells	Rpl26
Lfng	2.91463e-275	-0.471396	0.051	0.195	2.88577e-271	B cells	Lfng
Fgd2.1	7.54088e-274	0.491896	0.157	0.038	7.46622e-270	B cells	Fgd2
Cd160.1	6.45971e-273	-0.50965	0.016	0.128	6.39576e-269	B cells	Cd160
Chd3.1	8.22307e-273	-0.441904	0.206	0.409	8.14166e-269	B cells	Chd3
mt-Atp6.1	9.46109e-273	0.262624	0.977	0.946	9.36743e-269	B cells	mt-Atp6
Cd96.2	5.80199e-272	-0.370752	0.013	0.123	5.74455e-268	B cells	Cd96
S1pr1.1	6.15418e-272	0.563975	0.349	0.181	6.09325e-268	B cells	S1pr1
Pik3r1.1	1.2889e-271	-0.512049	0.127	0.302	1.27614e-267	B cells	Pik3r1
Chmp4b	1.73058e-271	-0.400085	0.178	0.376	1.71345e-267	B cells	Chmp4b
Cxcl2.2	7.13156e-271	-2.27933	0.035	0.16	7.06096e-267	B cells	Cxcl2
Tmem50a	4.48087e-270	-0.385671	0.38	0.605	4.43651e-266	B cells	Tmem50a
Camk2d.2	5.66044e-270	0.558009	0.284	0.131	5.6044e-266	B cells	Camk2d
Cyp4f18.2	1.30839e-269	0.383391	0.206	0.067	1.29543e-265	B cells	Cyp4f18
Bcl2.2	2.19533e-269	-0.495733	0.176	0.365	2.1736e-265	B cells	Bcl2
Iqgap2	4.87731e-269	-0.348145	0.01	0.116	4.82902e-265	B cells	Iqgap2
Slfn1	9.54138e-269	-0.415323	0.016	0.129	9.44692e-265	B cells	Slfn1
Cd200	1.97932e-266	0.483231	0.129	0.024	1.95972e-262	B cells	Cd200
Ap3s1	1.14918e-264	-0.365885	0.043	0.176	1.1378e-260	B cells	Ap3s1
Plekho1.2	1.97513e-264	0.504299	0.212	0.076	1.95558e-260	B cells	Plekho1
Ipcef1.1	4.77719e-264	-0.392229	0.02	0.134	4.7299e-260	B cells	Ipcef1
Socs1.2	6.06867e-264	-0.419706	0.047	0.183	6.00859e-260	B cells	Socs1
Tbx21.1	6.71322e-264	-0.407134	0.01	0.114	6.64676e-260	B cells	Tbx21
Ifitm2	8.21184e-263	-1.08365	0.015	0.122	8.13054e-259	B cells	Ifitm2
Ier3	2.18058e-262	-0.804108	0.007	0.108	2.15899e-258	B cells	Ier3
Lgals3bp.1	6.27777e-262	-0.367538	0.024	0.142	6.21562e-258	B cells	Lgals3bp
Nap1l1.2	7.14528e-261	0.565623	0.461	0.307	7.07454e-257	B cells	Nap1l1
Anxa6.1	2.19778e-258	-0.435233	0.19	0.381	2.17603e-254	B cells	Anxa6
Cyth4.1	1.13949e-257	-0.434116	0.099	0.26	1.12821e-253	B cells	Cyth4
Lasp1.1	8.20247e-257	-0.421141	0.073	0.222	8.12126e-253	B cells	Lasp1
Rsrp1.1	7.94042e-255	-0.415033	0.179	0.37	7.86181e-251	B cells	Rsrp1
Mbnl1.2	1.82063e-253	-0.383795	0.408	0.626	1.8026e-249	B cells	Mbnl1
Tmod3.2	1.43541e-252	0.560973	0.317	0.166	1.4212e-248	B cells	Tmod3
St3gal4	2.21075e-252	-0.337809	0.021	0.133	2.18886e-248	B cells	St3gal4
Sdc4.2	4.10518e-252	0.51371	0.204	0.069	4.06454e-248	B cells	Sdc4
Parp1.2	6.89142e-252	0.508831	0.216	0.082	6.82319e-248	B cells	Parp1
Zgpat.2	2.63477e-251	-0.38432	0.086	0.24	2.60868e-247	B cells	Zgpat
Vps37b.2	3.35113e-251	-0.402319	0.391	0.605	3.31795e-247	B cells	Vps37b
Osbpl3.1	4.0883e-251	-0.411294	0.013	0.116	4.04783e-247	B cells	Osbpl3
Pabpc1	1.08961e-250	-0.294876	0.714	0.857	1.07882e-246	B cells	Pabpc1
Sirpa	5.96996e-250	-0.534097	0.009	0.108	5.91086e-246	B cells	Sirpa
Igfbp4.1	8.08886e-250	-0.661154	0.017	0.124	8.00878e-246	B cells	Igfbp4
Dnaja1.2	2.59135e-249	-0.401082	0.19	0.384	2.5657e-245	B cells	Dnaja1
Aplp2.1	5.19283e-249	-0.450463	0.074	0.22	5.14142e-245	B cells	Aplp2
Irf1	4.39786e-248	-0.455427	0.16	0.342	4.35432e-244	B cells	Irf1
Rps6ka1.1	4.70714e-248	-0.373084	0.055	0.19	4.66053e-244	B cells	Rps6ka1
Gsr	1.3019e-247	-0.460588	0.017	0.123	1.28902e-243	B cells	Gsr
Mkrn1	1.99939e-247	-0.365227	0.186	0.379	1.9796e-243	B cells	Mkrn1
Gimap4.2	2.00551e-246	-0.514403	0.26	0.442	1.98566e-242	B cells	Gimap4
Cnn2.1	6.03526e-246	-0.424515	0.358	0.556	5.97551e-242	B cells	Cnn2
Ccl6	4.30948e-245	-1.03714	0.011	0.11	4.26682e-241	B cells	Ccl6
Tpst2.1	4.44121e-245	-0.324099	0.164	0.35	4.39724e-241	B cells	Tpst2
Ppp1r12a.1	7.06644e-245	-0.415594	0.188	0.376	6.99648e-241	B cells	Ppp1r12a
Glrx.1	1.93141e-244	-0.402347	0.03	0.145	1.91229e-240	B cells	Glrx
Ifitm3.2	6.9302e-244	-1.49771	0.04	0.158	6.86159e-240	B cells	Ifitm3
Myo1e.1	2.84487e-243	0.425919	0.136	0.031	2.81671e-239	B cells	Myo1e
Rasgef1b.1	8.10807e-243	0.529761	0.158	0.044	8.0278e-239	B cells	Rasgef1b
Cotl1.1	1.70013e-241	-0.411909	0.287	0.488	1.6833e-237	B cells	Cotl1
Arpc2	2.08567e-241	-0.343549	0.575	0.751	2.06503e-237	B cells	Arpc2
Atp5j2.1	4.48426e-240	-0.358945	0.461	0.655	4.43987e-236	B cells	Atp5j2
Sbk1	5.1128e-240	0.414472	0.134	0.03	5.06218e-236	B cells	Sbk1
Pitpnc1.2	1.98132e-239	-0.395535	0.074	0.218	1.96171e-235	B cells	Pitpnc1
Egr1.1	2.57428e-238	-0.780978	0.123	0.282	2.54879e-234	B cells	Egr1
Pfn1.1	5.2455e-238	-0.49275	0.759	0.807	5.19357e-234	B cells	Pfn1
Myo1c.1	9.26499e-237	0.420784	0.142	0.036	9.17326e-233	B cells	Myo1c
Gltp	1.01414e-236	-0.369917	0.127	0.293	1.0041e-232	B cells	Gltp
Fam129a.1	3.69463e-236	-0.341202	0.01	0.104	3.65805e-232	B cells	Fam129a
Vasp.1	2.33278e-235	-0.391206	0.236	0.432	2.30969e-231	B cells	Vasp
Txndc16	6.18537e-234	0.435403	0.123	0.026	6.12414e-230	B cells	Txndc16
Runx2	5.8709e-233	-0.421765	0.01	0.104	5.81278e-229	B cells	Runx2
Egln2.2	3.27482e-231	0.638799	0.266	0.127	3.2424e-227	B cells	Egln2
Pkib.1	1.68979e-230	0.413345	0.14	0.036	1.67306e-226	B cells	Pkib
Tagln2	1.88814e-230	-0.352115	0.339	0.549	1.86945e-226	B cells	Tagln2
Rab8b.1	8.84659e-230	-0.418987	0.045	0.168	8.75901e-226	B cells	Rab8b
Gimap3.2	2.16018e-229	-0.460641	0.28	0.464	2.1388e-225	B cells	Gimap3
Rcbtb2.1	2.83725e-229	-0.430705	0.032	0.144	2.80917e-225	B cells	Rcbtb2
Ptms.1	3.54808e-229	-0.474146	0.105	0.254	3.51296e-225	B cells	Ptms
Ubb.1	7.73016e-229	-0.277763	0.875	0.934	7.65363e-225	B cells	Ubb
Icam1	2.73712e-228	-0.44636	0.047	0.17	2.71003e-224	B cells	Icam1
Ms4a6c	3.17999e-228	-0.626685	0.017	0.115	3.14851e-224	B cells	Ms4a6c
Ikzf3.1	1.28033e-227	0.478872	0.331	0.182	1.26766e-223	B cells	Ikzf3
1810037I17Rik.1	1.32238e-227	-0.374779	0.257	0.454	1.30929e-223	B cells	1810037I17Rik
Cd86.1	1.63093e-227	0.478009	0.15	0.043	1.61479e-223	B cells	Cd86
Emp3	2.75825e-227	-0.456812	0.333	0.521	2.73095e-223	B cells	Emp3
Tox.2	1.06678e-226	-0.398991	0.014	0.11	1.05622e-222	B cells	Tox
Lmbrd1.2	4.74693e-226	0.489294	0.189	0.068	4.69993e-222	B cells	Lmbrd1
mt-Nd4.2	1.71359e-225	0.309575	0.908	0.856	1.69663e-221	B cells	mt-Nd4
Rgcc.1	1.98964e-225	-0.446749	0.102	0.254	1.96994e-221	B cells	Rgcc
Ctla4.1	5.45026e-223	-0.617009	0.031	0.139	5.3963e-219	B cells	Ctla4
Rac1	1.8051e-222	-0.365173	0.317	0.515	1.78723e-218	B cells	Rac1
Pomp	4.30746e-222	-0.335591	0.213	0.401	4.26481e-218	B cells	Pomp
Tln1.1	2.37825e-221	-0.385336	0.273	0.465	2.3547e-217	B cells	Tln1
Uqcrq	5.2968e-220	-0.328885	0.387	0.594	5.24436e-216	B cells	Uqcrq
Cd4.1	7.437e-220	-0.382475	0.013	0.105	7.36337e-216	B cells	Cd4
Cnr2	8.92342e-220	0.452034	0.102	0.017	8.83508e-216	B cells	Cnr2
Nsg2.1	1.47554e-219	-0.317893	0.012	0.104	1.46093e-215	B cells	Nsg2
Cd226.2	7.80011e-219	-0.3329	0.014	0.107	7.72289e-215	B cells	Cd226
Rnase6.2	4.65671e-218	0.338486	0.186	0.065	4.61061e-214	B cells	Rnase6
Cdkn1a	7.97062e-218	-0.506979	0.037	0.148	7.89171e-214	B cells	Cdkn1a
Rhob.2	5.21038e-216	0.418022	0.467	0.307	5.15879e-212	B cells	Rhob
Cox6c.1	2.86326e-215	-0.317308	0.545	0.721	2.83491e-211	B cells	Cox6c
Slc9a7.1	9.87533e-215	0.394033	0.147	0.044	9.77756e-211	B cells	Slc9a7
Oaz1.1	7.8938e-214	-0.265813	0.785	0.873	7.81565e-210	B cells	Oaz1
1110059E24Rik.1	9.48172e-214	0.390983	0.139	0.039	9.38785e-210	B cells	1110059E24Rik
Gapdh.2	2.28061e-213	-0.388088	0.645	0.759	2.25803e-209	B cells	Gapdh
Map7d1	3.44496e-213	-0.347881	0.038	0.15	3.41085e-209	B cells	Map7d1
Aes.2	1.11503e-212	-0.347324	0.255	0.446	1.10399e-208	B cells	Aes
Pdcd6ip.1	1.50744e-211	-0.360199	0.146	0.309	1.49251e-207	B cells	Pdcd6ip
Grina.1	2.0751e-211	-0.544454	0.092	0.233	2.05456e-207	B cells	Grina
Cd82.2	3.44324e-211	-0.414608	0.144	0.3	3.40915e-207	B cells	Cd82
Vars.1	7.85698e-211	0.510543	0.262	0.131	7.7792e-207	B cells	Vars
Gramd1a.2	1.67083e-210	-0.366617	0.145	0.307	1.65429e-206	B cells	Gramd1a
Sh3bp1.1	3.49582e-210	-0.317298	0.051	0.171	3.46121e-206	B cells	Sh3bp1
Dnajc3.1	1.59533e-209	-0.329914	0.155	0.321	1.57953e-205	B cells	Dnajc3
Ccr5.1	1.95554e-209	-0.331856	0.019	0.114	1.93618e-205	B cells	Ccr5
Zeb2.2	2.10722e-209	-0.525548	0.086	0.22	2.08636e-205	B cells	Zeb2
Plin2	5.07746e-209	-0.449845	0.013	0.102	5.02719e-205	B cells	Plin2
Tmem9b	2.42484e-208	-0.305496	0.095	0.239	2.40083e-204	B cells	Tmem9b
Bst2.1	2.75307e-208	-0.833409	0.161	0.32	2.72581e-204	B cells	Bst2
Filip1l.2	9.07794e-208	0.427156	0.175	0.063	8.98807e-204	B cells	Filip1l
Icosl	1.79486e-207	0.380973	0.114	0.025	1.77709e-203	B cells	Icosl
Tesc.2	6.23172e-207	-0.290825	0.014	0.103	6.17002e-203	B cells	Tesc
Tnfrsf18.2	6.33125e-207	-0.363966	0.047	0.162	6.26857e-203	B cells	Tnfrsf18
Gadd45b	7.75844e-207	-0.597204	0.108	0.252	7.68164e-203	B cells	Gadd45b
Haao	1.7079e-206	0.357799	0.106	0.021	1.69099e-202	B cells	Haao
Zc3hav1.1	2.40996e-205	-0.364469	0.231	0.418	2.38611e-201	B cells	Zc3hav1
Plekha2.1	5.4092e-205	0.526804	0.264	0.133	5.35565e-201	B cells	Plekha2
Arpc4	7.68678e-205	-0.359701	0.313	0.501	7.61068e-201	B cells	Arpc4
Bmyc.2	1.53916e-204	0.438141	0.192	0.078	1.52392e-200	B cells	Bmyc
Znrf1.1	4.61223e-204	-0.313094	0.033	0.138	4.56657e-200	B cells	Znrf1
Prdx5.1	4.35965e-202	-0.543419	0.211	0.376	4.31649e-198	B cells	Prdx5
Lst1.1	1.93751e-200	-0.833602	0.034	0.134	1.91833e-196	B cells	Lst1
Lrrfip1.1	3.12566e-200	-0.339716	0.102	0.244	3.09472e-196	B cells	Lrrfip1
Tob1.1	4.15786e-200	-0.409307	0.075	0.204	4.1167e-196	B cells	Tob1
Itgb7.2	7.56826e-200	-0.369329	0.244	0.422	7.49333e-196	B cells	Itgb7
Fkbp1a.1	1.90452e-199	-0.345901	0.195	0.366	1.88566e-195	B cells	Fkbp1a
Eif5a.1	6.79563e-199	-0.33663	0.445	0.632	6.72835e-195	B cells	Eif5a
Pfkp	9.07473e-199	-0.331342	0.049	0.163	8.98489e-195	B cells	Pfkp
Rbms1	1.58821e-197	-0.351706	0.188	0.357	1.57248e-193	B cells	Rbms1
Frat2.1	2.31654e-197	-0.357904	0.08	0.21	2.29361e-193	B cells	Frat2
Ezr.2	2.45464e-197	0.481837	0.529	0.418	2.43034e-193	B cells	Ezr
Creg1	3.15098e-197	-0.348481	0.032	0.134	3.11978e-193	B cells	Creg1
Capn2	1.28405e-196	-0.295571	0.024	0.119	1.27134e-192	B cells	Capn2
Tmem131l.1	2.54273e-196	0.491245	0.215	0.095	2.51755e-192	B cells	Tmem131l
H13	9.03947e-196	-0.344846	0.163	0.324	8.94997e-192	B cells	H13
Nbeal2.1	9.88279e-196	-0.355199	0.033	0.134	9.78495e-192	B cells	Nbeal2
Cxcr3.2	2.69684e-194	-0.312576	0.017	0.104	2.67014e-190	B cells	Cxcr3
Abr.1	2.91906e-194	-0.322155	0.025	0.121	2.89017e-190	B cells	Abr
Plk3	5.5874e-194	-0.466407	0.038	0.142	5.53209e-190	B cells	Plk3
Slfn2	8.92922e-194	-0.458655	0.173	0.332	8.84082e-190	B cells	Slfn2
Galnt6.1	1.47564e-192	-0.284562	0.032	0.132	1.46103e-188	B cells	Galnt6
Grn.2	3.2059e-192	-0.598299	0.04	0.143	3.17416e-188	B cells	Grn
Snx29	5.7207e-192	0.431083	0.107	0.024	5.66406e-188	B cells	Snx29
[truncated: 5,959 more rows]
