# Supplementary material for: The T Cell Receptor Immune Repertoire Protects the Liver From Reconsitution
Source: Front Immunol. 2020 Dec 18;11:584979. doi: 10.3389/fimmu.2020.584979 (PMC7775400; doi:10.3389/fimmu.2020.584979)
Supplement: Supplementary file 4 [file Table_3.xlsx]

## Sheet: 4W vs Ctrl
	ID	Description	GeneRatio	BgRatio	pvalue	p.adjust	qvalue	geneID	Count
mmu05332	mmu05332	Graft-versus-host disease	11/106	65/8656	2.83e-10	5.32e-08	3.34e-08	14964/15006/15015/15039/16627/14972/15002/14939/16643/18646/15001	11
mmu04612	mmu04612	Antigen processing and presentation	12/106	91/8656	8.52e-10	8.01e-08	5.03e-08	15481/14964/15006/15015/15039/15516/14972/14828/15002/16643/15001/12526	12
mmu05166	mmu05166	Human T-cell leukemia virus 1 infection	17/106	246/8656	6.06e-09	3.8e-07	2.38e-07	14964/15006/14281/22695/15015/15039/18035/12445/14972/11911/16818/21803/15002/16476/13653/16185/15001	17
mmu05330	mmu05330	Allograft rejection	9/106	63/8656	6e-08	2.82e-06	1.77e-06	14964/15006/15015/15039/14972/15002/14939/18646/15001	9
mmu05140	mmu05140	Leishmaniasis	9/106	69/8656	1.35e-07	4.81e-06	3.02e-06	13627/14281/18035/21803/15002/13057/16476/13058/15001	9
mmu04940	mmu04940	Type I diabetes mellitus	9/106	70/8656	1.54e-07	4.81e-06	3.02e-06	14964/15006/15015/15039/14972/15002/14939/18646/15001	9
mmu05320	mmu05320	Autoimmune thyroid disease	9/106	78/8656	3.97e-07	9.54e-06	5.98e-06	14964/15006/15015/15039/14972/15002/14939/18646/15001	9
mmu04380	mmu04380	Osteoclast differentiation	11/106	128/8656	4.06e-07	9.54e-06	5.98e-06	16477/16478/14281/18035/12703/18412/16818/21803/13057/12702/16476	11
mmu04668	mmu04668	TNF signaling pathway	10/106	113/8656	1.07e-06	2.11e-05	1.33e-05	12608/16477/14281/16362/18035/21929/11911/12702/16476/20304	10
mmu05416	mmu05416	Viral myocarditis	9/106	88/8656	1.12e-06	2.11e-05	1.33e-05	14964/15006/15015/15039/14972/13136/15002/18646/15001	9
mmu04659	mmu04659	Th17 cell differentiation	9/106	102/8656	3.91e-06	6.25e-05	3.92e-05	14281/15516/18035/16818/21803/15002/16476/16185/15001	9
mmu05169	mmu05169	Epstein-Barr virus infection	13/106	229/8656	3.99e-06	6.25e-05	3.92e-05	14964/15006/15015/15039/18035/21929/12445/14972/15002/16476/22352/14128/15001	13
mmu04650	mmu04650	Natural killer cell mediated cytotoxicity	9/106	117/8656	1.21e-05	0.000175156	0.00010984	14964/16627/14972/16818/17059/14939/16643/12506/18646	9
mmu04218	mmu04218	Cellular senescence	11/106	185/8656	1.5e-05	0.000201673	0.000126469	14964/15006/15015/15039/12445/14972/12193/19047/56458/18412/21803	11
mmu04658	mmu04658	Th1 and Th2 cell differentiation	7/106	87/8656	8.85e-05	0.00110931	0.000695648	14281/18035/16818/15002/16476/16185/15001	7
mmu04657	mmu04657	IL-17 signaling pathway	7/106	91/8656	0.000117789	0.00138402	0.000867918	12608/16478/14281/15516/18035/21929/16476	7
mmu04640	mmu04640	Hematopoietic cell lineage	7/106	95/8656	0.000154501	0.0017086	0.00107146	13136/15002/14128/12482/15001/12516/12526	7
mmu04514	mmu04514	Cell adhesion molecules (CAMs)	9/106	171/8656	0.000236014	0.00246504	0.00154583	14964/15006/15015/15039/14972/15002/15001/20343/12526	9
mmu05163	mmu05163	Human cytomegalovirus infection	11/106	255/8656	0.000273623	0.00270742	0.00169783	14964/15006/14683/15015/12767/15039/18035/14972/14674/11911/20304	11
mmu04145	mmu04145	Phagosome	9/106	180/8656	0.000345618	0.00324881	0.00203732	14964/15006/15015/15039/14972/15002/13057/13058/15001	9
mmu04935	mmu04935	Growth hormone synthesis, secretion and action	7/106	116/8656	0.000528557	0.00473184	0.00296734	16477/14683/14281/12703/11911/384783/12702	7
mmu05323	mmu05323	Rheumatoid arthritis	6/106	86/8656	0.000622352	0.00526865	0.00330397	14281/21803/15002/16476/20304/15001	6
mmu05170	mmu05170	Human immunodeficiency virus 1 infection	10/106	238/8656	0.000644569	0.00526865	0.00330397	14964/15006/14281/15015/12767/15039/18035/14972/16476/56438	10
mmu04137	mmu04137	Mitophagy - animal	5/106	63/8656	0.00100201	0.00784908	0.00492215	11911/17684/18412/16476/52440	5
mmu05167	mmu05167	Kaposi sarcoma-associated herpesvirus infection	9/106	216/8656	0.00128252	0.00927699	0.0058176	14964/15006/14281/22695/15015/15039/18035/14972/16476	9
mmu03010	mmu03010	Ribosome	8/106	174/8656	0.00128299	0.00927699	0.0058176	67115/57808/19944/11837/27367/319195/110954/100043813	8
mmu04210	mmu04210	Apoptosis	7/106	136/8656	0.00135531	0.00943701	0.00591795	14281/18035/11911/16476/14939/13036/18646	7
mmu04933	mmu04933	AGE-RAGE signaling pathway in diabetic complications	6/106	101/8656	0.00144727	0.00954208	0.00598384	56458/21803/16476/13653/18712/13058	6
mmu05031	mmu05031	Amphetamine addiction	5/106	69/8656	0.00151194	0.00954208	0.00598384	14683/14281/19047/11911/16476	5
mmu05142	mmu05142	Chagas disease (American trypanosomiasis)	6/106	102/8656	0.00152267	0.00954208	0.00598384	14683/14281/18035/21803/16476/20304	6
mmu04144	mmu04144	Endocytosis	10/106	269/8656	0.00163747	0.00976956	0.00612649	15481/14964/15006/15015/12767/15039/14972/330192/11867/16185	10
mmu04672	mmu04672	Intestinal immune network for IgA production	4/106	42/8656	0.0016629	0.00976956	0.00612649	12767/21803/15002/15001	4
mmu05162	mmu05162	Measles	7/106	144/8656	0.00188393	0.010653	0.00668049	15481/14281/18035/21929/12445/16476/16185	7
mmu04928	mmu04928	Parathyroid hormone synthesis, secretion and action	6/106	107/8656	0.00194563	0.010653	0.00668049	16478/14683/14281/14674/11911/13653	6
mmu05203	mmu05203	Viral carcinogenesis	9/106	231/8656	0.00203952	0.010653	0.00668049	14964/15006/15015/15039/18035/12445/14972/11911/16476	9
mmu05145	mmu05145	Toxoplasmosis	6/106	108/8656	0.00203994	0.010653	0.00668049	15481/18035/12703/21803/15002/15001	6
mmu04662	mmu04662	B cell receptor signaling pathway	5/106	82/8656	0.00323861	0.0164556	0.0103193	14281/18035/15985/16476/12518	5
mmu04141	mmu04141	Protein processing in endoplasmic reticulum	7/106	164/8656	0.00390896	0.0193391	0.0121275	15481/15516/17872/11911/14828/81489/56438	7
mmu05164	mmu05164	Influenza A	7/106	166/8656	0.0041781	0.0201406	0.0126302	18035/12445/81489/15002/12702/20304/15001	7
mmu04926	mmu04926	Relaxin signaling pathway	6/106	129/8656	0.00493537	0.0231962	0.0145464	14683/14281/18035/11911/21803/16476	6
mmu04710	mmu04710	Circadian rhythm	3/106	30/8656	0.0056992	0.0256952	0.0161135	18626/56438/20893	3
mmu04217	mmu04217	Necroptosis	7/106	176/8656	0.00574043	0.0256952	0.0161135	14319/15516/21929/18412/319171/13058/15267	7
mmu04915	mmu04915	Estrogen signaling pathway	6/106	134/8656	0.00593068	0.0259295	0.0162604	15481/14683/14281/15516/11911/16476	6
mmu05321	mmu05321	Inflammatory bowel disease (IBD)	4/106	60/8656	0.00612433	0.0261676	0.0164097	21803/15002/16476/15001	4
mmu05322	mmu05322	Systemic lupus erythematosus	6/106	142/8656	0.00781753	0.0326599	0.020481	15081/15078/15002/319171/15267/15001	6
mmu05020	mmu05020	Prion diseases	3/106	34/8656	0.00810843	0.0331388	0.0207813	14828/20304/13653	3
mmu05418	mmu05418	Fluid shear stress and atherosclerosis	6/106	144/8656	0.00835004	0.03327	0.0208636	14281/19252/15516/18412/13057/16476	6
mmu04660	mmu04660	T cell receptor signaling pathway	5/106	103/8656	0.00849446	0.03327	0.0208636	14281/18035/16818/16476/12526	5
mmu05340	mmu05340	Primary immunodeficiency	3/106	36/8656	0.00950572	0.0364709	0.0228709	16818/12518/12526	3
mmu04010	mmu04010	MAPK signaling pathway	9/106	294/8656	0.00980233	0.0368568	0.0231129	15481/16478/14281/19252/11911/21803/240672/16476/63953	9
mmu04932	mmu04932	Non-alcoholic fatty liver disease (NAFLD)	6/106	150/8656	0.0101041	0.0372465	0.0233572	11911/384783/72674/21803/12702/16476	6
mmu04920	mmu04920	Adipocytokine signaling pathway	4/106	71/8656	0.0110184	0.03867	0.02425	18035/384783/72674/12702	4
mmu04921	mmu04921	Oxytocin signaling pathway	6/106	153/8656	0.0110732	0.03867	0.02425	13629/14683/14281/19047/16476/19735	6
mmu04931	mmu04931	Insulin resistance	5/106	110/8656	0.0111073	0.03867	0.02425	18035/19047/56458/384783/12702	5
mmu05034	mmu05034	Alcoholism	7/106	201/8656	0.011532	0.038805	0.0243346	14683/15081/19047/11911/15078/319171/15267	7
mmu04917	mmu04917	Prolactin signaling pathway	4/106	72/8656	0.0115589	0.038805	0.0243346	14281/16362/12703/12702	4
mmu04216	mmu04216	Ferroptosis	3/106	41/8656	0.0135811	0.0447939	0.0280903	14319/17254/13058	3
mmu04621	mmu04621	NOD-like receptor signaling pathway	7/106	210/8656	0.0144037	0.0466879	0.0292779	15516/18035/21929/13057/16476/20304/13058	7

## Sheet: 8W vs Ctrl
	ID	Description	GeneRatio	BgRatio	pvalue	p.adjust	qvalue	geneID	Count
mmu03010	mmu03010	Ribosome	72/584	174/8656	1.51e-39	4.31e-37	3.09e-37	19944/27050/19921/67115/22186/22121/11837/19951/66480/20103/19943/16898/67025/20102/26961/19941/76808/67097/267019/270106/19899/20055/20115/19896/19933/27207/20088/27367/68193/66489/68436/269261/54217/14109/19942/19988/20084/20085/66483/67891/20044/66242/20091/107734/27176/19989/20116/16785/66292/68052/67671/20090/67186/100503670/19981/268449/20005/67945/57808/110954/65019/66407/19935/67248/54127…	72
mmu00190	mmu00190	Oxidative phosphorylation	41/584	133/8656	2.61e-17	3.74e-15	2.68e-15	11984/12868/66043/67184/66091/67942/11957/12859/11949/66416/110323/57423/595136/68194/228033/54405/71679/66142/12866/75406/66414/17992/67680/68342/78330/69875/11951/11974/66694/66152/67264/67130/72900/70316/22273/66495/67126/108664/27060/66576/114143	41
mmu05010	mmu05010	Alzheimer disease	45/584	173/8656	9.46e-16	9.02e-14	6.47e-14	14433/12868/66043/67184/66091/67942/11957/12859/11949/66340/66416/110323/13063/595136/68194/228033/54405/71679/66142/12866/75406/66414/17992/67680/68342/78330/69875/11951/66694/66152/67264/67130/72900/70316/22273/66495/15108/12313/67126/66576/21926/11816/56637/13666/19055	45
mmu04932	mmu04932	Non-alcoholic fatty liver disease (NAFLD)	41/584	150/8656	2.91e-15	2.08e-13	1.5e-13	12868/67184/66091/12859/66416/110323/13063/595136/68194/54405/66142/12866/75406/66414/17992/67680/68342/78330/69875/12028/66694/66152/384783/67264/67130/72900/70316/22273/66495/16476/11911/18033/22433/12125/13198/66576/21926/16194/56637/13666/18707	41
mmu05012	mmu05012	Parkinson disease	39/584	142/8656	1.19e-14	6.82e-13	4.9e-13	12868/66043/67184/66091/67942/11957/12859/11949/22187/57320/66416/110323/13063/595136/68194/228033/54405/71679/66142/12866/75406/66414/17992/67680/68342/78330/69875/11951/66694/66152/67264/67130/72900/70316/22273/66495/67126/66576/22213	39
mmu05016	mmu05016	Huntington disease	43/584	193/8656	1.43e-12	6.82e-11	4.89e-11	12868/66043/67184/66091/67942/11957/12859/11949/66416/110323/13063/595136/68194/228033/54405/71679/66142/12866/11773/75406/66414/17992/67680/68342/78330/69875/12757/11951/12028/66694/66152/20655/67264/67130/72900/70316/22273/66495/67126/66576/67300/11772/14775	43
mmu04714	mmu04714	Thermogenesis	44/584	230/8656	1.74e-10	7.09e-09	5.09e-09	12868/66043/67184/66091/67942/11957/12859/11949/66416/110323/14683/57423/595136/68194/228033/54405/71679/66142/12866/75406/66414/17992/67680/68342/78330/69875/11951/66694/66152/52469/67264/66379/67130/66272/72900/70316/22273/66495/67126/20104/26397/66576/93760/14784	44
mmu04659	mmu04659	Th17 cell differentiation	25/584	102/8656	9.92e-09	3.55e-07	2.54e-07	12502/12501/12500/14281/16818/16797/16186/12503/18035/15000/16476/16364/15978/18033/15519/15251/14969/19883/14961/60504/18018/16190/16194/16452/19055	25
mmu04612	mmu04612	Antigen processing and presentation	23/584	91/8656	2.08e-08	6.6e-07	4.74e-07	15481/15039/19188/14964/19186/15525/14828/15000/14827/15018/19141/15978/12526/12525/13039/15519/15007/13030/16149/14969/14961/21926/110557	23
mmu04658	mmu04658	Th1 and Th2 cell differentiation	21/584	87/8656	2.01e-07	5.76e-06	4.13e-06	12502/12501/12500/14281/16818/16797/16186/12503/18035/15000/16476/15978/18033/18129/19664/14969/14961/18018/16190/16452/19055	21
mmu04660	mmu04660	T cell receptor signaling pathway	23/584	103/8656	2.44e-07	6.35e-06	4.56e-06	12502/12501/12500/14281/16818/16797/12503/18035/16476/15978/12526/19264/12525/18033/240354/26400/21926/18018/14784/56637/19055/18707/14360	23
mmu05140	mmu05140	Leishmaniasis	18/584	69/8656	4.33e-07	1.03e-05	7.41e-06	13627/14281/13057/18035/16414/15000/16476/13058/15978/18033/68652/16401/14969/18751/14961/21926/17357/16452	18
mmu03040	mmu03040	Spliceosome	26/584	132/8656	5.64e-07	1.24e-05	8.91e-06	15481/20826/66094/69878/107686/20462/72654/13207/67332/20384/20383/20637/64340/67996/15381/22185/13204/108121/20382/14105/15387/67958/192170/66921/15382/101943	26
mmu05235	mmu05235	PD-L1 expression and PD-1 checkpoint pathway in cancer	20/584	88/8656	1.11e-06	2.26e-05	1.62e-05	12502/12501/12500/14281/16818/16797/12503/13001/18035/16476/15978/18033/26397/15251/60533/18018/19211/16452/19055/18707	20
mmu05170	mmu05170	Human immunodeficiency virus 1 infection	37/584	238/8656	1.31e-06	2.5e-05	1.79e-05	12502/19354/12501/67673/12500/14281/15039/14707/14700/14964/13063/12503/56438/12028/18035/12631/14827/15018/12767/12313/18750/16476/18033/68652/26397/69550/15007/21938/26400/18751/80287/21926/18018/110557/19229/19055/18707	37
mmu04210	mmu04210	Apoptosis	25/584	136/8656	3.5e-06	6.26e-05	4.5e-05	14281/13063/12028/18035/13041/17210/16476/14939/11911/13039/17873/16905/12983/11797/18033/11796/12125/13198/16906/13030/21926/22029/13033/13666/18707	25
mmu03050	mmu03050	Proteasome	13/584	46/8656	6.73e-06	0.000113188	8.12e-05	16913/19188/26446/16912/19171/19186/26445/19170/19166/15978/19167/26443/20422	13
mmu05166	mmu05166	Human T-cell leukemia virus 1 infection	36/584	246/8656	7.59e-06	0.000120602	8.66e-05	12502/12501/12445/12500/14281/16818/15039/16186/12257/14964/66156/12028/18035/21894/16414/56310/15000/15018/22695/16476/11911/23872/18033/26401/15007/14969/14961/12575/21926/18018/110557/13714/23871/19211/19055/18707	36
mmu04650	mmu04650	Natural killer cell mediated cytotoxicity	22/584	117/8656	9.22e-06	0.000138788	9.96e-05	19354/16818/23900/16797/14964/12503/16414/18750/14939/20400/17086/15978/27007/20963/18751/21926/18018/14784/19229/19055/18707/14360	22
mmu05169	mmu05169	Epstein-Barr virus infection	34/584	229/8656	9.92e-06	0.000141863	0.000101815	12502/12501/12445/12500/15039/14964/13063/12503/12028/21929/18035/15000/14827/15018/16476/12505/17873/20963/18033/68652/252870/26397/12125/15007/19664/14969/26400/14961/12575/21926/110557/20422/18707/17246	34
mmu04064	mmu04064	NF-kappa B signaling pathway	21/584	110/8656	1.15e-05	0.000156675	0.000112446	16994/16818/16797/22196/13001/21929/18035/20310/20303/17873/20963/12475/217069/11797/18033/11796/68652/240354/18751/21926/22029	21
mmu05323	mmu05323	Rheumatoid arthritis	18/584	86/8656	1.3e-05	0.000169106	0.000121368	11984/16994/14281/11974/20310/16414/15000/16476/20304/15978/13039/108664/27060/14969/14961/21926/20302/114143	18
mmu04662	mmu04662	B cell receptor signaling pathway	17/584	82/8656	2.57e-05	0.000319809	0.000229528	19354/15985/14281/18035/16476/83490/20963/18033/12518/240354/18751/18018/14784/12517/56637/19055/18707	17
mmu05134	mmu05134	Legionellosis	14/584	60/8656	3.31e-05	0.000394725	0.000283295	13627/15481/13063/76308/18035/12747/20310/16414/66824/12475/18033/21926/19324/12750	14
mmu05135	mmu05135	Yersinia infection	21/584	121/8656	5.14e-05	0.000581732	0.000417511	19354/14281/16818/16797/11845/18035/16476/66824/216799/18033/68652/26397/16401/26400/21926/18018/66713/56637/26431/19229/18707	21
mmu04640	mmu04640	Hematopoietic cell lineage	18/584	95/8656	5.35e-05	0.000581732	0.000417511	12502/12493/12501/12500/12481/12516/15000/12505/12526/12525/22042/12475/16401/14969/14961/21926/16190/16194	18
mmu04144	mmu04144	Endocytosis	36/584	269/8656	5.49e-05	0.000581732	0.000417511	11867/15481/22187/15039/16186/66914/14964/54198/98366/11773/74192/12757/11845/56378/15018/12767/22042/71955/110355/15007/67300/11772/19157/12343/13660/110557/19326/212285/69780/12402/69710/18571/69178/26431/211673/17246	36
mmu04666	mmu04666	Fc gamma R-mediated phagocytosis	17/584	90/8656	8.94e-05	0.000912962	0.000655236	19354/11867/16797/74192/11845/56378/12631/18750/17118/19264/18753/20963/18751/18754/94176/17357/18707	17
mmu05163	mmu05163	Human cytomegalovirus infection	34/584	255/8656	9.5e-05	0.000937244	0.000672663	19354/15039/14707/14700/14964/14683/13063/12028/18035/14827/15018/12767/12313/18750/20304/11911/20303/18033/15007/18751/75547/12575/21926/18018/110557/14784/16194/20302/56637/19229/19055/18707/17246/12387	34
mmu04657	mmu04657	IL-17 signaling pathway	17/584	91/8656	0.000103179	0.000983643	0.000705964	14281/16478/21929/18035/20310/16476/15978/20201/22027/20202/18033/68652/15519/50772/21926/16172/56637	17
mmu05167	mmu05167	Kaposi sarcoma-associated herpesvirus infection	30/584	216/8656	0.000116323	0.00106637	0.000765337	14281/93739/22187/15039/14707/14700/14964/13063/56486/12028/18035/20310/15018/12313/22695/16476/20963/18033/17164/15251/15007/26400/12575/18018/110557/16452/56637/19055/18707/12387	30
mmu04380	mmu04380	Osteoclast differentiation	21/584	128/8656	0.000119314	0.00106637	0.000765337	14281/16818/13057/16478/18035/16476/12703/19261/15978/20963/18033/68652/14284/26400/21926/18018/14784/18412/19055/18707/14360	21
mmu05152	mmu05152	Tuberculosis	26/584	178/8656	0.000143962	0.00124767	0.000895455	11984/13063/12028/12721/16414/15000/16985/12313/15978/56619/108664/20963/12475/18033/16784/240354/27060/16149/15526/14969/14961/21926/16452/13033/19055/114143	26
mmu05202	mmu05202	Transcriptional misregulation in cancer	26/584	183/8656	0.000227019	0.00190963	0.00137055	15081/15078/12028/233908/13207/14939/80859/19696/17873/12475/108829/18124/18033/11796/107951/17355/13198/72949/12575/140780/17260/22029/13714/18507/70439/17246	26
mmu05418	mmu05418	Fluid shear stress and atherosclerosis	22/584	144/8656	0.000240735	0.00196715	0.00141183	19354/14870/170930/14281/13057/16598/56551/12313/16476/11898/15978/13039/22027/20971/18033/15519/26400/21926/17260/18412/18707/12387	22
mmu05132	mmu05132	Salmonella infection	14/584	75/8656	0.000418324	0.00332335	0.00238518	18643/11867/14281/56212/74192/20310/56378/16476/66824/15978/20303/12475/18033/20302	14
mmu04066	mmu04066	HIF-1 signaling pathway	18/584	112/8656	0.000465515	0.0035983	0.00258251	14433/67673/13806/11674/16828/56438/18750/20104/13058/15978/22042/18033/15251/18751/12575/16194/112406/18707	18
mmu05321	mmu05321	Inflammatory bowel disease (IBD)	12/584	60/8656	0.000556969	0.0040952	0.00293914	16186/15000/16476/15978/18033/14969/19883/14961/21926/60504/18018/16190	12
mmu03015	mmu03015	mRNA surveillance pathway	16/584	95/8656	0.000558436	0.0040952	0.00293914	19045/20220/19047/68991/18458/19052/19054/225363/53319/233789/269061/51792/66899/229512/192160/192170	16
mmu04141	mmu04141	Protein processing in endoplasmic reticulum	23/584	164/8656	0.000619428	0.00442891	0.00317864	15481/20832/56438/12028/13135/14828/81489/14827/66256/54197/11911/22027/67437/22433/13198/15519/26400/53421/67819/13666/22213/17155/64209	23
mmu03013	mmu03013	RNA transport	23/584	166/8656	0.000735642	0.00500937	0.00359524	68135/66085/170930/13627/20220/54709/22196/67676/69731/117109/13690/100042807/18458/13669/217869/19386/53319/269966/13682/67204/192160/192170/226982	23
mmu05164	mmu05164	Influenza A	23/584	166/8656	0.000735642	0.00500937	0.00359524	12445/13063/12028/18035/81489/15000/18750/66824/20304/15978/216799/217069/18033/16646/14969/53319/269966/18751/14961/21926/19326/16452/18707	23
mmu04723	mmu04723	Retrograde endocannabinoid signaling	21/584	148/8656	0.000903272	0.00600781	0.00431183	67184/66091/14707/14700/66416/595136/68194/54405/75406/66414/17992/68342/78330/69875/67264/67130/72900/70316/66495/18750/18751	21
mmu05142	mmu05142	Chagas disease (American trypanosomiasis)	16/584	102/8656	0.00123688	0.00803972	0.00577014	12502/12501/12500/14281/14683/12503/18035/16476/20304/15978/19052/18033/21926/20302/51792/18707	16
mmu04625	mmu04625	C-type lectin receptor signaling pathway	17/584	112/8656	0.00128385	0.0081596	0.00585617	18035/16985/12313/16476/66824/216799/56619/18753/20963/18033/240354/17164/21926/18018/19055/18707/17246	17
mmu04668	mmu04668	TNF signaling pathway	17/584	113/8656	0.00141915	0.00882342	0.00633259	14281/21929/18035/20310/16476/20304/11911/11797/18033/11796/68652/26397/21938/26400/21926/22029/18707	17
mmu04142	mmu04142	Lysosome	18/584	124/8656	0.00158016	0.00961546	0.00690105	11984/12757/16792/13041/19141/19156/13039/108664/16784/27060/15211/13030/67300/75612/56722/53599/13033/114143	18
mmu05203	mmu05203	Viral carcinogenesis	28/584	231/8656	0.001746	0.0104033	0.00746646	12445/15039/14964/12028/18035/22629/15018/16476/13205/11911/19696/20963/18033/252870/17164/15007/19664/14884/12575/110557/14784/22029/15387/60595/18707/22627/56233/17246	28
mmu05340	mmu05340	Primary immunodeficiency	8/584	36/8656	0.00229006	0.0133665	0.00959318	12501/12500/16818/16186/12526/19264/12525/12518	8
mmu05161	mmu05161	Hepatitis B	21/584	162/8656	0.00284131	0.0162523	0.0116643	14281/13063/12028/18035/18750/16476/13205/11911/18033/26401/68652/26397/26400/18751/12575/21926/18018/14784/16452/19229/18707	21
mmu04137	mmu04137	Mitophagy - animal	11/584	63/8656	0.00295997	0.0162798	0.0116841	66437/93739/22187/56486/13001/16476/11911/15251/66687/18412/13666	11
mmu05330	mmu05330	Allograft rejection	11/584	63/8656	0.00295997	0.0162798	0.0116841	15039/14964/15000/15018/14939/15978/15007/14969/14961/21926/110557	11
mmu04218	mmu04218	Cellular senescence	23/584	185/8656	0.00315711	0.0170365	0.0122271	19045/12445/15039/14964/19047/15018/12313/17873/18033/26397/17164/15007/58800/12575/18018/110557/18412/23871/19211/19055/18707/54354/17246	23
mmu05100	mmu05100	Bacterial invasion of epithelial cells	12/584	73/8656	0.00328231	0.0173841	0.0124766	11867/54204/56212/56526/74192/12757/56378/67300/12402/18707/140580/12387	12
mmu05162	mmu05162	Measles	19/584	144/8656	0.0036241	0.0188453	0.0135254	12502/12501/68135/12445/12500/15481/14281/16186/13063/13001/12028/21929/18035/16476/18033/68652/56637/13666/18707	19
mmu05332	mmu05332	Graft-versus-host disease	11/584	65/8656	0.00380763	0.0194461	0.0139566	15039/14964/15000/15018/14939/15978/15007/14969/14961/21926/110557	11
mmu04071	mmu04071	Sphingolipid signaling pathway	17/584	124/8656	0.00388514	0.0194939	0.0139908	19354/12028/18750/19052/18033/19054/20397/18751/18754/21926/208449/51792/19211/13033/18707/14360/13609	17
mmu04145	mmu04145	Phagosome	22/584	180/8656	0.00472448	0.0232966	0.01672	11984/15039/13057/14964/11974/12721/16414/15000/15018/13058/22042/13039/108664/12475/16784/27060/15007/14969/14961/110557/53421/114143	22
mmu04664	mmu04664	Fc epsilon RI signaling pathway	11/584	67/8656	0.0048388	0.0234559	0.0168344	19354/16797/18750/11690/20963/26397/26400/21926/14784/18707/14360	11
mmu05145	mmu05145	Toxoplasmosis	15/584	108/8656	0.0057377	0.0273071	0.0195984	15481/13063/18035/15000/12703/15978/11797/18033/11796/68652/26397/14969/14961/21926/16452	15
mmu05416	mmu05416	Viral myocarditis	13/584	88/8656	0.00582424	0.0273071	0.0195984	19354/15039/14964/13063/16414/15000/15018/13690/15007/14969/14961/110557/14360	13
mmu04620	mmu04620	Toll-like receptor signaling pathway	14/584	99/8656	0.00637777	0.0294201	0.0211149	14281/18035/16476/20304/20303/12475/18033/54473/68652/26397/26400/21926/20302/18707	14
mmu04940	mmu04940	Type I diabetes mellitus	11/584	70/8656	0.0067873	0.0304075	0.0218235	15039/14964/15000/15018/14939/15978/15007/14969/14961/21926/110557	11
mmu04931	mmu04931	Insulin resistance	15/584	110/8656	0.00680447	0.0304075	0.0218235	19045/19047/18035/384783/18753/18033/18751/18754/21926/19246/19211/108155/56637/76055/18707	15
mmu04062	mmu04062	Chemokine signaling pathway	23/584	198/8656	0.00728549	0.0318222	0.0228389	19354/14707/14700/18035/20310/12767/16963/20304/20303/18753/18033/20305/110355/12772/18751/94176/14784/20302/16452/56637/19229/18707/140580	23
mmu05014	mmu05014	Amyotrophic lateral sclerosis (ALS)	9/584	52/8656	0.00734357	0.0318222	0.0228389	13063/12028/20655/26397/21938/21926/67819/19055/14775	9
mmu04621	mmu04621	NOD-like receptor signaling pathway	24/584	210/8656	0.00756741	0.0323027	0.0231837	93739/13057/56486/21929/18035/20310/56551/16476/66824/20304/13058/216799/59027/18753/11797/18033/11796/68652/15519/13030/58800/21926/77040/22627	24
mmu04670	mmu04670	Leukocyte transendothelial migration	15/584	115/8656	0.0101754	0.0427965	0.0307152	19354/67938/13057/67268/16414/12767/18750/13058/16401/18751/60595/19229/18707/54354/12387	15
mmu04140	mmu04140	Autophagy - animal	17/584	138/8656	0.011281	0.0467589	0.033559	93739/56486/384783/13039/18753/19052/16784/15251/54170/13030/18412/19211/19324/13033/13666/77040/18707	17
