# Supplementary material for: The T Cell Receptor Immune Repertoire Protects the Liver From Reconsitution
Source: Front Immunol. 2020 Dec 18;11:584979. doi: 10.3389/fimmu.2020.584979 (PMC7775400; doi:10.3389/fimmu.2020.584979)
Supplement: Supplementary file 5 [file Table_4.xlsx]

## Sheet: Cell marker
	p_val	avg_logFC	pct.1	pct.2	p_val_adj	cluster	gene
Nkg7	0	0.887184	0.874	0.477	0	CD8	Nkg7
Cd8b1	0	0.863715	0.754	0.214	0	CD8	Cd8b1
Ly6c2	0	0.842836	0.473	0.108	0	CD8	Ly6c2
Cd8a	0	0.456573	0.636	0.164	0	CD8	Cd8a
Ccl5	4.14391e-297	1.84364	0.789	0.556	4.06435e-293	CD8	Ccl5
Klrd1	4.98195e-282	0.530627	0.459	0.117	4.88629e-278	CD8	Klrd1
Ccl4	1.76764e-223	0.9214	0.412	0.113	1.73371e-219	CD8	Ccl4
Junb	2.39213e-179	-0.480351	0.928	0.98	2.3462e-175	CD8	Junb
Gzma	1.74658e-176	1.48747	0.267	0.056	1.71304e-172	CD8	Gzma
Cd4	3.95231e-167	-0.280931	0.019	0.252	3.87642e-163	CD8	Cd4
Gzmk	1.39114e-149	0.327182	0.229	0.044	1.36443e-145	CD8	Gzmk
Fth1	3.26116e-124	-0.281804	0.989	0.996	3.19854e-120	CD8	Fth1
Ccl3	7.9098e-119	0.446217	0.186	0.035	7.75793e-115	CD8	Ccl3
Fos	5.43218e-117	-0.486903	0.647	0.82	5.32789e-113	CD8	Fos
Ctsw	7.97878e-115	0.274476	0.538	0.279	7.82559e-111	CD8	Ctsw
Zyx	9.64252e-93	0.251899	0.428	0.223	9.45739e-89	CD8	Zyx
Ctla2a	2.03701e-91	0.291528	0.356	0.165	1.9979e-87	CD8	Ctla2a
Jun	3.03297e-90	-0.418773	0.488	0.682	2.97473e-86	CD8	Jun
Igfbp4	8.04987e-89	-0.475393	0.106	0.286	7.89531e-85	CD8	Igfbp4
Dusp10	6.02406e-87	-0.313912	0.237	0.436	5.9084e-83	CD8	Dusp10
Hcst	4.10747e-83	0.285028	0.904	0.843	4.02861e-79	CD8	Hcst
Dusp1	1.90069e-82	-0.428572	0.666	0.808	1.86419e-78	CD8	Dusp1
Ppp1r15a	2.67751e-82	-0.299333	0.55	0.718	2.6261e-78	CD8	Ppp1r15a
Pnrc1	4.5633e-82	-0.25191	0.861	0.932	4.47568e-78	CD8	Pnrc1
Cytip	3.04237e-79	-0.273291	0.438	0.62	2.98396e-75	CD8	Cytip
Ltb	6.83886e-78	-0.292648	0.621	0.776	6.70755e-74	CD8	Ltb
Lgals1	1.26036e-75	0.585111	0.536	0.384	1.23616e-71	CD8	Lgals1
H3f3b	6.65191e-71	-0.284157	0.99	0.995	6.52419e-67	CD8	H3f3b
H2afz	1.05408e-65	0.253881	0.753	0.639	1.03384e-61	CD8	H2afz
Gimap6	1.07206e-65	-0.2666	0.755	0.85	1.05147e-61	CD8	Gimap6
Nr4a1	2.12131e-62	-0.325034	0.215	0.382	2.08058e-58	CD8	Nr4a1
Ifi27l2a	1.08247e-60	-0.339563	0.648	0.805	1.06169e-56	CD8	Ifi27l2a
Zfp36	1.07689e-59	-0.39698	0.537	0.677	1.05621e-55	CD8	Zfp36
Ly6a	3.953e-57	-0.288816	0.364	0.542	3.8771e-53	CD8	Ly6a
Rgcc	8.04715e-51	-0.256424	0.233	0.383	7.89265e-47	CD8	Rgcc
Ms4a4b	3.95037e-50	0.295312	0.673	0.583	3.87453e-46	CD8	Ms4a4b
AW112010	8.90694e-48	0.2729	0.834	0.738	8.73593e-44	CD8	AW112010
Cd52	2.32966e-46	0.348602	0.964	0.96	2.28493e-42	CD8	Cd52
Egr1	5.10664e-46	-0.56811	0.212	0.341	5.00859e-42	CD8	Egr1
Ly6e	1.34393e-45	-0.264523	0.603	0.721	1.31812e-41	CD8	Ly6e
Btg2	2.67602e-40	-0.266513	0.498	0.615	2.62464e-36	CD8	Btg2
S100a6	4.8357e-40	0.288387	0.522	0.39	4.74285e-36	CD8	S100a6
Rgs2	3.00296e-38	-0.258377	0.315	0.442	2.94531e-34	CD8	Rgs2
Pim1	1.82097e-36	-0.299701	0.413	0.534	1.78601e-32	CD8	Pim1
Trbv1	9.84259e-22	-0.402558	0.07	0.135	9.65362e-18	CD8	Trbv1
Ctsw.1	0	-0.571593	0.132	0.578	0	CD4	Ctsw
Cd8a.1	0	-0.764852	0.095	0.543	0	CD4	Cd8a
AW112010.1	0	-0.783545	0.655	0.873	0	CD4	AW112010
Cd8b1.1	0	-0.800522	0.178	0.611	0	CD4	Cd8b1
Ccl4.1	0	-1.39285	0.034	0.382	0	CD4	Ccl4
Nkg7.1	0	-1.49358	0.313	0.883	0	CD4	Nkg7
Ccl5.1	0	-2.89315	0.443	0.808	0	CD4	Ccl5
Hcst.1	1.46457e-273	-0.516283	0.799	0.922	1.43645e-269	CD4	Hcst
Igfbp4.1	1.15164e-267	0.689865	0.39	0.078	1.12953e-263	CD4	Igfbp4
Il2rb	3.18643e-265	-0.499653	0.184	0.564	3.12525e-261	CD4	Il2rb
Gzmb	7.96676e-263	-0.826387	0.033	0.337	7.8138e-259	CD4	Gzmb
Rps29	1.34858e-262	0.35933	1	1	1.32269e-258	CD4	Rps29
Cxcr6	2.15006e-261	-0.439558	0.042	0.354	2.10877e-257	CD4	Cxcr6
Cd52.1	5.07534e-260	-0.661446	0.946	0.973	4.9779e-256	CD4	Cd52
Plac8	1.16984e-249	-0.474483	0.112	0.452	1.14737e-245	CD4	Plac8
Rps19	4.01802e-243	0.347088	1	1	3.94088e-239	CD4	Rps19
Dusp2	4.47421e-239	-0.673573	0.395	0.702	4.38831e-235	CD4	Dusp2
Ifng	5.39746e-238	-0.490745	0.041	0.331	5.29383e-234	CD4	Ifng
Ly6c2.1	9.01124e-238	-0.798046	0.077	0.382	8.83823e-234	CD4	Ly6c2
Xcl1	3.41497e-236	-0.512947	0.01	0.27	3.3494e-232	CD4	Xcl1
Cd7	7.28988e-226	-0.882343	0.135	0.436	7.14992e-222	CD4	Cd7
Ifitm10	2.42024e-221	-0.311224	0.035	0.305	2.37377e-217	CD4	Ifitm10
Rps20	3.07271e-208	0.337144	1	1	3.01372e-204	CD4	Rps20
Klrd1.1	5.28922e-206	-0.487246	0.09	0.372	5.18766e-202	CD4	Klrd1
Ccr7	2.05771e-205	0.465124	0.655	0.302	2.01821e-201	CD4	Ccr7
Cd4.1	1.29453e-203	0.288729	0.301	0.052	1.26967e-199	CD4	Cd4
Cst7	4.16638e-203	-0.321189	0.082	0.366	4.08639e-199	CD4	Cst7
Ctla2a.1	8.25955e-201	-0.42449	0.083	0.363	8.10097e-197	CD4	Ctla2a
Rps28	5.08051e-198	0.275347	1	1	4.98297e-194	CD4	Rps28
Thy1	1.8486e-193	-0.458404	0.386	0.67	1.81311e-189	CD4	Thy1
S100a6.1	1.62014e-192	-0.556814	0.26	0.588	1.58903e-188	CD4	S100a6
Rps8	1.86065e-192	0.262843	1	1	1.82492e-188	CD4	Rps8
Zyx.1	5.5788e-192	-0.358927	0.141	0.431	5.47168e-188	CD4	Zyx
Dusp10.1	7.60091e-191	0.438847	0.517	0.233	7.45498e-187	CD4	Dusp10
Cd160	1.12802e-181	-0.300356	0.007	0.211	1.10636e-177	CD4	Cd160
Rps26	9.24271e-171	0.262274	0.999	0.999	9.06525e-167	CD4	Rps26
Rac2	2.87068e-170	-0.377134	0.911	0.948	2.81556e-166	CD4	Rac2
Trib2	4.67395e-169	0.259464	0.262	0.048	4.58421e-165	CD4	Trib2
Lef1	7.4423e-164	0.38301	0.525	0.259	7.29941e-160	CD4	Lef1
Pfn1	1.77975e-161	-0.449622	0.963	0.977	1.74558e-157	CD4	Pfn1
Epsti1	3.34718e-159	-0.340562	0.232	0.512	3.28291e-155	CD4	Epsti1
Cox8a	4.37007e-159	-0.330643	0.852	0.921	4.28617e-155	CD4	Cox8a
Id2	5.09623e-159	-0.452757	0.288	0.564	4.99838e-155	CD4	Id2
Hopx	2.4132e-157	-0.26453	0.077	0.316	2.36687e-153	CD4	Hopx
Tmsb4x	6.37328e-157	-0.329038	1	1	6.25092e-153	CD4	Tmsb4x
Gzmk.1	9.17394e-157	-0.315107	0.011	0.197	8.99781e-153	CD4	Gzmk
Rpl35	4.00192e-154	0.27696	1	0.998	3.92509e-150	CD4	Rpl35
Ahnak	6.95966e-154	-0.345547	0.238	0.536	6.82603e-150	CD4	Ahnak
Sh3bgrl3	3.17098e-153	-0.45037	0.817	0.883	3.11009e-149	CD4	Sh3bgrl3
Lgals1.1	2.07793e-151	-0.63261	0.296	0.56	2.03804e-147	CD4	Lgals1
Tcf7	1.60774e-150	0.351218	0.606	0.348	1.57687e-146	CD4	Tcf7
Itgal	2.17799e-149	-0.340671	0.231	0.495	2.13617e-145	CD4	Itgal
Cyba	4.32844e-149	-0.42742	0.566	0.741	4.24533e-145	CD4	Cyba
Itgb2	1.61898e-146	-0.356285	0.235	0.49	1.58789e-142	CD4	Itgb2
Klrc1	1.73319e-146	-0.257199	0.005	0.172	1.69991e-142	CD4	Klrc1
S1pr1	3.09222e-146	0.310388	0.43	0.179	3.03285e-142	CD4	S1pr1
Rflnb	5.88087e-145	0.307721	0.393	0.152	5.76795e-141	CD4	Rflnb
Efhd2	8.4261e-143	-0.300991	0.128	0.366	8.26432e-139	CD4	Efhd2
Klrk1	1.99474e-139	-0.262608	0.009	0.174	1.95644e-135	CD4	Klrk1
Ctsd	6.48475e-138	-0.3404	0.254	0.501	6.36024e-134	CD4	Ctsd
Rplp0	2.32088e-137	0.267144	1	1	2.27632e-133	CD4	Rplp0
Ptprcap	2.9963e-131	-0.359654	0.527	0.719	2.93877e-127	CD4	Ptprcap
Dnajc15	2.39695e-127	-0.288315	0.226	0.472	2.35093e-123	CD4	Dnajc15
Npc2	1.45062e-126	0.331546	0.799	0.663	1.42277e-122	CD4	Npc2
Actb	6.15117e-126	-0.364066	0.982	0.988	6.03307e-122	CD4	Actb
Bhlhe40	3.54073e-125	-0.268808	0.154	0.405	3.47275e-121	CD4	Bhlhe40
Lcp1	1.20075e-124	-0.330556	0.363	0.599	1.1777e-120	CD4	Lcp1
Rgs1	1.75165e-122	-0.54261	0.292	0.529	1.71802e-118	CD4	Rgs1
Gzma.1	1.66098e-119	-1.36577	0.042	0.211	1.62909e-115	CD4	Gzma
Ccl3.1	7.98803e-115	-0.456485	0.013	0.157	7.83466e-111	CD4	Ccl3
S100a11	1.45327e-106	-0.304497	0.34	0.573	1.42537e-102	CD4	S100a11
Satb1	5.19843e-106	0.328091	0.572	0.353	5.09862e-102	CD4	Satb1
Sh2d2a	1.19643e-104	-0.297368	0.263	0.489	1.17346e-100	CD4	Sh2d2a
Cd48	2.05564e-102	-0.256395	0.158	0.364	2.01617e-98	CD4	Cd48
Emb	3.40257e-101	0.2944	0.651	0.431	3.33724e-97	CD4	Emb
Gimap7	6.45163e-100	-0.256817	0.153	0.352	6.32776e-96	CD4	Gimap7
Gimap4	9.58007e-97	-0.326401	0.397	0.588	9.39613e-93	CD4	Gimap4
Rgcc.1	1.02005e-96	0.321132	0.438	0.235	1.00046e-92	CD4	Rgcc
Cd3g	6.84234e-96	-0.328499	0.847	0.884	6.71096e-92	CD4	Cd3g
Rcbtb2	2.16794e-95	-0.322016	0.09	0.26	2.12632e-91	CD4	Rcbtb2
Ifi27l2a.1	3.07478e-94	0.430838	0.848	0.663	3.01575e-90	CD4	Ifi27l2a
Rgs10	2.19598e-92	0.265975	0.459	0.257	2.15382e-88	CD4	Rgs10
Klf2	9.7314e-89	0.268193	0.943	0.779	9.54456e-85	CD4	Klf2
H2-Q7	1.24622e-88	-0.281216	0.774	0.852	1.22229e-84	CD4	H2-Q7
Cd3e	2.65943e-86	-0.255941	0.913	0.938	2.60837e-82	CD4	Cd3e
Myl6	1.16602e-84	-0.251912	0.911	0.941	1.14363e-80	CD4	Myl6
H2-Q6	7.30439e-84	-0.251593	0.419	0.621	7.16415e-80	CD4	H2-Q6
Capzb	5.24676e-82	-0.258434	0.416	0.596	5.14602e-78	CD4	Capzb
Psmb8	2.54038e-79	-0.277277	0.557	0.695	2.4916e-75	CD4	Psmb8
Gapdh	1.62773e-74	-0.261575	0.913	0.939	1.59648e-70	CD4	Gapdh
Ms4a4b.1	3.49294e-72	-0.331329	0.545	0.676	3.42587e-68	CD4	Ms4a4b
Pim1.1	2.4434e-70	0.39402	0.577	0.416	2.39649e-66	CD4	Pim1
Gimap6.1	1.53201e-59	0.256166	0.857	0.78	1.5026e-55	CD4	Gimap6
Egr1.1	6.40799e-28	-0.413156	0.241	0.336	6.28496e-24	CD4	Egr1
Nfkbia	3.19356e-25	0.257905	0.699	0.62	3.13224e-21	CD4	Nfkbia
Blk	0	0.424827	0.288	0.003	0	γδ T	Blk
Trdc	5.79635e-221	0.616367	0.328	0.012	5.68506e-217	γδ T	Trdc
Tmem176a	7.37791e-209	0.720708	0.394	0.021	7.23625e-205	γδ T	Tmem176a
Tmem176b	2.9066e-149	0.810054	0.369	0.027	2.85079e-145	γδ T	Tmem176b
Serpinb1a	2.57228e-101	0.262187	0.207	0.012	2.5229e-97	γδ T	Serpinb1a
Nr1d1	1.78752e-77	0.331709	0.207	0.016	1.7532e-73	γδ T	Nr1d1
Tcrg-C1	9.52436e-71	0.374767	0.268	0.03	9.34149e-67	γδ T	Tcrg-C1
Aqp3	4.29547e-57	0.255139	0.207	0.023	4.213e-53	γδ T	Aqp3
S100a6.2	6.01432e-44	1.02533	0.838	0.429	5.89885e-40	γδ T	S100a6
Capg	3.90461e-41	0.433224	0.354	0.083	3.82964e-37	γδ T	Capg
S100a4	1.0026e-40	0.796766	0.571	0.212	9.83349e-37	γδ T	S100a4
Actn2	5.1636e-39	0.403955	0.394	0.106	5.06446e-35	γδ T	Actn2
Cxcr6.1	3.0457e-33	0.468588	0.54	0.204	2.98722e-29	γδ T	Cxcr6
Rps27	1.85382e-32	-0.357689	1	1	1.81823e-28	γδ T	Rps27
Furin	1.24296e-28	0.337692	0.338	0.101	1.2191e-24	γδ T	Furin
Cd44	1.32124e-28	0.449728	0.46	0.175	1.29587e-24	γδ T	Cd44
Rpsa	5.65365e-28	-0.322884	1	1	5.5451e-24	γδ T	Rpsa
Rps24	7.3917e-28	-0.348345	1	1	7.24978e-24	γδ T	Rps24
Rps16	8.48826e-28	-0.360118	1	1	8.32528e-24	γδ T	Rps16
Rps19.1	4.08964e-27	-0.447624	1	1	4.01112e-23	γδ T	Rps19
Rpl13	1.33644e-26	-0.35482	1	1	1.31078e-22	γδ T	Rpl13
Cd28	3.22699e-26	-0.534528	0.152	0.559	3.16503e-22	γδ T	Cd28
Ckb	5.11474e-26	0.28038	0.247	0.062	5.01653e-22	γδ T	Ckb
Rps3a1	1.23755e-24	-0.310316	1	1	1.21379e-20	γδ T	Rps3a1
Ccr7.1	1.03639e-23	-0.723842	0.096	0.471	1.01649e-19	γδ T	Ccr7
Lmo4	3.267e-23	0.393763	0.242	0.067	3.20428e-19	γδ T	Lmo4
Rps4x	3.51932e-23	-0.34494	1	1	3.45175e-19	γδ T	Rps4x
Rora	4.4918e-23	0.540035	0.434	0.182	4.40555e-19	γδ T	Rora
Rps8.1	1.44761e-22	-0.336449	1	1	1.41982e-18	γδ T	Rps8
Rpl23	4.46828e-22	-0.282164	1	1	4.38248e-18	γδ T	Rpl23
Rps7	1.43668e-21	-0.32314	1	1	1.40909e-17	γδ T	Rps7
Rpl18	5.1538e-21	-0.287313	1	1	5.05485e-17	γδ T	Rpl18
Ramp1	7.26937e-21	0.579071	0.409	0.184	7.1298e-17	γδ T	Ramp1
Cish	7.73998e-21	0.38478	0.343	0.129	7.59137e-17	γδ T	Cish
Rpl12	1.15827e-20	-0.358608	0.995	0.997	1.13603e-16	γδ T	Rpl12
Rpl8	2.34888e-20	-0.323986	1	0.999	2.30378e-16	γδ T	Rpl8
Ccr2	1.49152e-19	0.272873	0.293	0.099	1.46289e-15	γδ T	Ccr2
S100a10	2.18771e-19	0.50865	0.944	0.764	2.1457e-15	γδ T	S100a10
Bhlhe40.1	6.09034e-19	0.357886	0.571	0.284	5.97341e-15	γδ T	Bhlhe40
Tmsb4x.1	1.40841e-18	0.269132	1	1	1.38137e-14	γδ T	Tmsb4x
Rps10	1.45615e-18	-0.276541	1	1	1.42819e-14	γδ T	Rps10
Lmna	1.58905e-18	0.266356	0.207	0.058	1.55854e-14	γδ T	Lmna
Rps3	1.95963e-18	-0.285303	1	1	1.922e-14	γδ T	Rps3
Rpl3	2.61077e-18	-0.311908	0.995	0.998	2.56064e-14	γδ T	Rpl3
Rps20.1	3.7515e-18	-0.405276	1	1	3.67947e-14	γδ T	Rps20
Rplp0.1	4.41697e-18	-0.362099	1	1	4.33216e-14	γδ T	Rplp0
Itm2b	5.52737e-18	0.384133	0.955	0.824	5.42125e-14	γδ T	Itm2b
Acsbg1	5.94642e-18	0.276213	0.192	0.053	5.83225e-14	γδ T	Acsbg1
Rps5	6.58219e-18	-0.285914	1	1	6.45581e-14	γδ T	Rps5
Rplp1	1.46067e-17	-0.283517	1	1	1.43262e-13	γδ T	Rplp1
Rps18	2.76605e-17	-0.300575	1	0.999	2.71294e-13	γδ T	Rps18
Gramd3	4.95796e-17	-0.381001	0.081	0.375	4.86276e-13	γδ T	Gramd3
Rpl19	8.62864e-17	-0.260546	1	1	8.46297e-13	γδ T	Rpl19
Rps15a	1.04344e-16	-0.26196	1	1	1.02341e-12	γδ T	Rps15a
Actb.1	1.07304e-16	0.290829	1	0.985	1.05244e-12	γδ T	Actb
Gimap6.2	1.62991e-16	-0.381413	0.626	0.819	1.59862e-12	γδ T	Gimap6
Rpl36a	2.34379e-16	-0.326775	1	0.997	2.29879e-12	γδ T	Rpl36a
S100a11.1	2.82125e-16	0.561817	0.657	0.463	2.76708e-12	γδ T	S100a11
Rpl14	3.46048e-16	-0.333306	0.99	0.996	3.39404e-12	γδ T	Rpl14
Satb1.1	7.15111e-16	-0.434351	0.177	0.459	7.01381e-12	γδ T	Satb1
Rps28.1	1.11476e-15	-0.315539	1	1	1.09335e-11	γδ T	Rps28
Lef1.1	1.16434e-15	-0.377638	0.101	0.387	1.14198e-11	γδ T	Lef1
Cd7.1	1.26963e-15	0.544927	0.53	0.294	1.24526e-11	γδ T	Cd7
Rps6	1.30384e-15	-0.284704	0.97	0.989	1.27881e-11	γδ T	Rps6
Rpl35.1	1.86184e-15	-0.319164	1	0.999	1.8261e-11	γδ T	Rpl35
Rgs1.1	2.44223e-15	0.431821	0.652	0.416	2.39534e-11	γδ T	Rgs1
Eef1b2	5.41322e-15	-0.310408	0.96	0.983	5.30928e-11	γδ T	Eef1b2
Ms4a6b	6.49547e-15	-0.340208	0.247	0.547	6.37076e-11	γδ T	Ms4a6b
Il18r1	6.87356e-15	0.269943	0.313	0.133	6.74159e-11	γδ T	Il18r1
Rpl7	7.04468e-15	-0.250395	1	0.997	6.90942e-11	γδ T	Rpl7
Prr13	7.47074e-15	0.385899	0.596	0.363	7.3273e-11	γδ T	Prr13
Nrip1	1.26306e-14	0.348902	0.384	0.188	1.23881e-10	γδ T	Nrip1
Oaz1	1.40907e-14	0.264378	0.99	0.97	1.38202e-10	γδ T	Oaz1
Rpl21	1.80852e-14	-0.272819	1	0.999	1.7738e-10	γδ T	Rpl21
Rpl5	3.07664e-14	-0.322549	0.975	0.984	3.01757e-10	γδ T	Rpl5
Rpl9-ps6	3.26749e-14	-0.287682	1	0.999	3.20475e-10	γδ T	Rpl9-ps6
Rpl10a	4.84882e-14	-0.280463	0.995	0.998	4.75572e-10	γδ T	Rpl10a
Areg	5.39805e-14	0.301212	0.116	0.026	5.29441e-10	γδ T	Areg
Rpl15	8.87269e-14	-0.288798	0.995	0.996	8.70233e-10	γδ T	Rpl15
Laptm5	1.92802e-13	0.284527	0.924	0.824	1.89101e-09	γδ T	Laptm5
Dgat1	3.33539e-13	0.263532	0.308	0.135	3.27136e-09	γδ T	Dgat1
Rps2	4.135e-13	-0.271282	1	1	4.05561e-09	γδ T	Rps2
Selenop	8.2278e-13	0.336063	0.364	0.182	8.06982e-09	γδ T	Selenop
Klf2.1	8.47262e-13	-0.403275	0.742	0.856	8.30995e-09	γδ T	Klf2
Lgals1.2	9.94788e-13	0.588339	0.657	0.435	9.75688e-09	γδ T	Lgals1
Hsp90b1	1.09815e-12	0.419507	0.611	0.439	1.07707e-08	γδ T	Hsp90b1
Cd3g.1	1.33971e-12	0.336709	0.934	0.865	1.31399e-08	γδ T	Cd3g
Rps29.1	1.34216e-12	-0.326642	1	1	1.31639e-08	γδ T	Rps29
Gm8369	3.23958e-12	-0.303449	0.162	0.423	3.17738e-08	γδ T	Gm8369
Gpx1	4.46802e-12	0.469426	0.641	0.48	4.38223e-08	γδ T	Gpx1
Dap	4.8885e-12	0.256281	0.323	0.153	4.79464e-08	γδ T	Dap
Rflnb.1	6.1229e-12	-0.292717	0.051	0.266	6.00534e-08	γδ T	Rflnb
Lgals3	6.90542e-12	0.416617	0.258	0.107	6.77284e-08	γδ T	Lgals3
Crip1	7.44771e-12	0.491502	0.975	0.928	7.30472e-08	γδ T	Crip1
Rpl4	9.92035e-12	-0.261655	0.944	0.968	9.72988e-08	γδ T	Rpl4
Psap	2.08489e-11	0.297854	0.606	0.425	2.04486e-07	γδ T	Psap
Rps15	2.11836e-11	-0.263211	0.924	0.966	2.07768e-07	γδ T	Rps15
Sell	3.32766e-11	-0.265463	0.066	0.28	3.26377e-07	γδ T	Sell
Ly6c2.2	4.32431e-11	-0.491121	0.04	0.249	4.24129e-07	γδ T	Ly6c2
Dusp10.2	4.52358e-11	-0.335991	0.146	0.367	4.43673e-07	γδ T	Dusp10
Vim	7.05948e-11	0.558325	0.667	0.503	6.92394e-07	γδ T	Vim
Actn1	9.94047e-11	-0.25283	0.056	0.254	9.74962e-07	γδ T	Actn1
Igfbp4.2	2.70392e-10	-0.450287	0.035	0.224	2.652e-06	γδ T	Igfbp4
Selplg	4.16178e-10	0.285982	0.763	0.65	4.08187e-06	γδ T	Selplg
Ms4a4b.2	4.35241e-10	-0.299139	0.364	0.623	4.26884e-06	γδ T	Ms4a4b
Lsp1	7.07064e-10	0.358974	0.692	0.561	6.93489e-06	γδ T	Lsp1
Rpl22l1	7.7524e-10	-0.253246	0.919	0.949	7.60355e-06	γδ T	Rpl22l1
Usmg5	1.22084e-09	0.256049	0.732	0.645	1.1974e-05	γδ T	Usmg5
Gm10260	1.24498e-09	-0.26857	0.141	0.35	1.22108e-05	γδ T	Gm10260
Ifi27l2a.2	2.46535e-09	-0.453512	0.581	0.751	2.41802e-05	γδ T	Ifi27l2a
Id2.1	5.79986e-09	0.329901	0.606	0.434	5.68851e-05	γδ T	Id2
Zfp36l1	1.52635e-08	0.426844	0.551	0.41	0.000149704	γδ T	Zfp36l1
Pim1.2	3.22777e-08	0.357612	0.621	0.486	0.00031658	γδ T	Pim1
Ahnak.1	2.34877e-07	0.253552	0.54	0.397	0.00230367	γδ T	Ahnak
Gadd45b	1.02289e-06	0.296286	0.343	0.211	0.0100325	γδ T	Gadd45b
Txnip	1.70315e-06	-0.278142	0.424	0.584	0.0167045	γδ T	Txnip
Tspo	1.39506e-05	0.270365	0.601	0.539	0.136827	γδ T	Tspo
Ly6e.1	1.78286e-05	0.396159	0.717	0.676	0.174863	γδ T	Ly6e
Xcl1.1	0	0.884592	0.632	0.067	0	NKT	Xcl1
Rcbtb2.1	0	0.78933	0.605	0.108	0	NKT	Rcbtb2
Ifng.1	0	0.673527	0.589	0.13	0	NKT	Ifng
Cxcr6.2	0	0.562856	0.625	0.139	0	NKT	Cxcr6
Rgs1.2	3.02545e-280	0.965967	0.817	0.351	2.96736e-276	NKT	Rgs1
AW112010.2	2.44957e-269	0.689429	0.979	0.737	2.40254e-265	NKT	AW112010
Egr1.2	1.41155e-267	1.22087	0.655	0.229	1.38444e-263	NKT	Egr1
Itga1	8.53656e-264	0.319795	0.321	0.036	8.37266e-260	NKT	Itga1
Il2rb.1	3.30998e-251	0.677742	0.772	0.324	3.24643e-247	NKT	Il2rb
Rps26.1	7.33652e-250	-0.524116	1	0.999	7.19565e-246	NKT	Rps26
Cd160.1	2.57882e-242	0.421825	0.397	0.069	2.5293e-238	NKT	Cd160
Ckb.1	2.91122e-242	0.302252	0.281	0.028	2.85533e-238	NKT	Ckb
Rpl35a	9.4735e-238	-0.639089	0.984	0.996	9.29161e-234	NKT	Rpl35a
Rac2.1	1.44444e-234	0.535445	0.99	0.921	1.4167e-230	NKT	Rac2
Plac8.1	2.29044e-234	0.582785	0.663	0.233	2.24646e-230	NKT	Plac8
Fth1.1	2.54923e-229	0.484564	1	0.992	2.50028e-225	NKT	Fth1
Gimap4.1	6.94937e-226	0.591217	0.837	0.442	6.81594e-222	NKT	Gimap4
Ccr7.2	7.82573e-224	-1.0037	0.03	0.539	7.67547e-220	NKT	Ccr7
Sh3bgrl3.1	2.51949e-223	0.595432	0.978	0.831	2.47111e-219	NKT	Sh3bgrl3
Rps20.2	7.67246e-222	-0.634314	1	1	7.52515e-218	NKT	Rps20
Rps29.2	1.05247e-217	-0.578202	1	1	1.03226e-213	NKT	Rps29
Socs2	6.29983e-217	0.270161	0.234	0.02	6.17887e-213	NKT	Socs2
Nkg7.2	3.32738e-208	0.500833	0.952	0.566	3.26349e-204	NKT	Nkg7
Rpl35.2	1.5359e-206	-0.530234	0.997	0.999	1.50641e-202	NKT	Rpl35
Ly6a.1	4.55989e-200	0.719479	0.801	0.418	4.47234e-196	NKT	Ly6a
Dusp1.1	2.61578e-199	0.834959	0.922	0.725	2.56556e-195	NKT	Dusp1
Rps8.2	5.1859e-192	-0.427186	1	1	5.08633e-188	NKT	Rps8
Ly6e.2	3.81844e-191	0.586043	0.902	0.637	3.74512e-187	NKT	Ly6e
Podnl1	1.0459e-189	0.252347	0.258	0.033	1.02582e-185	NKT	Podnl1
Tmsb4x.2	7.88148e-187	0.367663	1	1	7.73015e-183	NKT	Tmsb4x
Ctsw.2	2.33927e-184	0.46635	0.718	0.315	2.29435e-180	NKT	Ctsw
Rps28.2	1.47913e-181	-0.472201	0.999	1	1.45073e-177	NKT	Rps28
Pfn1.1	8.27571e-181	0.469557	0.998	0.966	8.11682e-177	NKT	Pfn1
Gm19585	1.80959e-173	0.369765	0.459	0.136	1.77484e-169	NKT	Gm19585
Rpl30	1.27925e-169	-0.319426	1	1	1.25468e-165	NKT	Rpl30
Rps19.2	1.86809e-168	-0.47819	1	1	1.83222e-164	NKT	Rps19
Fgl2	2.2591e-167	0.276521	0.289	0.051	2.21573e-163	NKT	Fgl2
Fos.1	2.83642e-165	0.778925	0.907	0.729	2.78197e-161	NKT	Fos
Cd52.2	4.89427e-165	0.452468	0.996	0.955	4.8003e-161	NKT	Cd52
Rps27.1	7.18764e-163	-0.321188	1	1	7.04963e-159	NKT	Rps27
Dusp2.1	1.30654e-156	0.708595	0.829	0.515	1.28146e-152	NKT	Dusp2
Rps27a	1.69153e-155	-0.334613	1	1	1.65905e-151	NKT	Rps27a
Cxcr3	1.99568e-154	0.291617	0.371	0.093	1.95737e-150	NKT	Cxcr3
Btg2.1	5.7406e-154	0.640224	0.809	0.529	5.63038e-150	NKT	Btg2
Cd40lg	3.29937e-153	0.332794	0.345	0.084	3.23602e-149	NKT	Cd40lg
Cd3g.2	1.83401e-152	0.42267	0.967	0.849	1.7988e-148	NKT	Cd3g
Gm10076	2.7572e-152	-0.282331	1	1	2.70426e-148	NKT	Gm10076
H2-D1	3.57589e-151	0.387376	1	0.993	3.50723e-147	NKT	H2-D1
Rplp1.1	4.5393e-151	-0.366264	1	1	4.45214e-147	NKT	Rplp1
Bcl2a1b	2.97739e-150	0.335851	0.48	0.157	2.92022e-146	NKT	Bcl2a1b
Dok2	8.56214e-149	0.337528	0.452	0.147	8.39775e-145	NKT	Dok2
Id2.2	2.40756e-144	0.465824	0.766	0.38	2.36134e-140	NKT	Id2
Serpina3g	9.74557e-144	0.284984	0.27	0.052	9.55845e-140	NKT	Serpina3g
Lcp1.1	1.35245e-143	0.413738	0.788	0.439	1.32648e-139	NKT	Lcp1
Efhd2.1	2.88394e-143	0.374285	0.536	0.209	2.82856e-139	NKT	Efhd2
Rps3a1.1	6.40478e-143	-0.313872	1	1	6.28181e-139	NKT	Rps3a1
Itgb2.1	1.12082e-141	0.389008	0.674	0.321	1.0993e-137	NKT	Itgb2
Itgal.1	5.88152e-141	0.383369	0.678	0.321	5.76859e-137	NKT	Itgal
Fosb.1	9.94193e-140	0.576283	0.694	0.369	9.75104e-136	NKT	Fosb
Cd82	3.61692e-138	0.415365	0.589	0.256	3.54747e-134	NKT	Cd82
Gimap3	1.55627e-137	0.427432	0.83	0.523	1.52639e-133	NKT	Gimap3
Ptprcap.1	1.63022e-137	0.416539	0.868	0.59	1.59892e-133	NKT	Ptprcap
Gapdh.1	8.3235e-136	0.413888	0.974	0.919	8.16369e-132	NKT	Gapdh
Gzmb.1	1.02082e-132	0.817934	0.442	0.156	1.00122e-128	NKT	Gzmb
H3f3b.1	3.15835e-131	0.525862	0.996	0.993	3.09771e-127	NKT	H3f3b
Gimap7.1	1.7263e-130	0.341662	0.533	0.213	1.69316e-126	NKT	Gimap7
Cd226	4.31253e-127	0.273844	0.346	0.098	4.22973e-123	NKT	Cd226
Myl6.1	3.62912e-126	0.351576	0.99	0.917	3.55944e-122	NKT	Myl6
Rplp0.2	1.26378e-125	-0.423326	1	1	1.23952e-121	NKT	Rplp0
Rps23	5.59515e-125	-0.292924	0.999	1	5.48773e-121	NKT	Rps23
Rhob	2.46433e-124	0.436086	0.437	0.161	2.41701e-120	NKT	Rhob
Cd7.2	5.43557e-124	0.847204	0.537	0.257	5.33121e-120	NKT	Cd7
Ccnd3	5.24041e-123	0.392404	0.652	0.346	5.13979e-119	NKT	Ccnd3
Bhlhe40.2	9.1458e-123	0.382493	0.578	0.24	8.9702e-119	NKT	Bhlhe40
Cd3e.1	8.79807e-121	0.344842	0.979	0.917	8.62915e-117	NKT	Cd3e
Gm8797	1.71322e-120	0.420367	0.554	0.248	1.68033e-116	NKT	Gm8797
Hopx.1	1.85279e-120	0.309058	0.451	0.165	1.81722e-116	NKT	Hopx
Cyba.1	2.92374e-117	0.381397	0.879	0.623	2.8676e-113	NKT	Cyba
Skap1	6.70366e-117	0.378018	0.759	0.468	6.57495e-113	NKT	Skap1
Gng2	2.48471e-115	0.272524	0.425	0.152	2.43701e-111	NKT	Gng2
AU020206	2.7989e-114	0.273883	0.379	0.123	2.74516e-110	NKT	AU020206
Psmb8.1	5.70058e-114	0.393245	0.841	0.595	5.59112e-110	NKT	Psmb8
Hcst.2	1.97197e-112	0.362942	0.967	0.848	1.93411e-108	NKT	Hcst
Rplp2	2.97558e-112	-0.343553	0.999	1	2.91845e-108	NKT	Rplp2
Rpl39	3.32999e-112	-0.252247	1	1	3.26606e-108	NKT	Rpl39
Rpl37a	1.82673e-111	-0.331875	1	1	1.79166e-107	NKT	Rpl37a
Cebpb	9.20276e-111	0.480979	0.663	0.371	9.02607e-107	NKT	Cebpb
S1pr1.1	2.98074e-110	-0.387124	0.026	0.341	2.92351e-106	NKT	S1pr1
Malat1	1.49498e-109	0.419696	0.997	0.974	1.46628e-105	NKT	Malat1
Rpl21.1	1.57171e-108	-0.336076	0.995	1	1.54154e-104	NKT	Rpl21
Zfp36l2	2.01526e-108	0.460855	0.913	0.788	1.97657e-104	NKT	Zfp36l2
Ccnd2	5.18629e-107	0.382313	0.662	0.369	5.08671e-103	NKT	Ccnd2
Sell.1	2.87098e-105	-0.377207	0.02	0.32	2.81585e-101	NKT	Sell
Thy1.1	1.16093e-103	0.372215	0.805	0.495	1.13864e-99	NKT	Thy1
Rpl5.1	1.52351e-103	-0.386564	0.967	0.987	1.49426e-99	NKT	Rpl5
Rps7.1	3.07728e-103	-0.30575	1	1	3.0182e-99	NKT	Rps7
Aldoa	6.85715e-103	0.361949	0.703	0.423	6.72549e-99	NKT	Aldoa
Rpl17	1.79939e-102	-0.318201	0.982	0.995	1.76484e-98	NKT	Rpl17
Lyst	3.9524e-102	0.279624	0.339	0.113	3.87651e-98	NKT	Lyst
Xist	4.84355e-102	0.369003	0.388	0.138	4.75056e-98	NKT	Xist
Rpl23.1	2.99684e-100	-0.250313	1	1	2.9393e-96	NKT	Rpl23
Zfp36.1	3.32585e-100	0.632223	0.808	0.592	3.26199e-96	NKT	Zfp36
Ppp1r18	6.64864e-100	0.340834	0.762	0.484	6.52099e-96	NKT	Ppp1r18
Oaz1.1	1.89619e-99	0.29178	0.989	0.968	1.85978e-95	NKT	Oaz1
Itm2b.1	6.16715e-99	0.326846	0.95	0.805	6.04874e-95	NKT	Itm2b
Tcf7.1	3.89413e-97	-0.451361	0.216	0.51	3.81936e-93	NKT	Tcf7
Rps21	2.10921e-96	-0.2572	1	1	2.06872e-92	NKT	Rps21
Ucp2	1.38575e-95	0.351845	0.757	0.487	1.35914e-91	NKT	Ucp2
Cox8a.1	6.77738e-94	0.296216	0.961	0.877	6.64726e-90	NKT	Cox8a
Rpl7.1	8.25441e-93	-0.280935	0.994	0.998	8.09592e-89	NKT	Rpl7
Atp1b3	1.00093e-92	-0.415372	0.269	0.557	9.81715e-89	NKT	Atp1b3
Ppp1r12a	2.09614e-92	0.331264	0.606	0.33	2.05589e-88	NKT	Ppp1r12a
Shisa5	1.0843e-91	0.312213	0.974	0.902	1.06349e-87	NKT	Shisa5
Actn1.1	7.39821e-90	-0.315718	0.022	0.29	7.25616e-86	NKT	Actn1
Trbv13-2	2.28563e-89	0.476062	0.231	0.062	2.24175e-85	NKT	Trbv13-2
Serf2	1.65236e-87	0.259669	0.992	0.97	1.62063e-83	NKT	Serf2
Gabarapl2	6.49281e-87	0.30154	0.679	0.408	6.36815e-83	NKT	Gabarapl2
Sept1	9.03445e-87	0.315939	0.777	0.517	8.86099e-83	NKT	Sept1
Higd1a	1.31571e-86	0.265318	0.508	0.246	1.29044e-82	NKT	Higd1a
Ltb.1	3.09488e-86	0.440515	0.856	0.694	3.03546e-82	NKT	Ltb
Clic1	3.10103e-86	0.309513	0.775	0.514	3.04149e-82	NKT	Clic1
Pgam1	1.49022e-85	0.274257	0.427	0.188	1.46161e-81	NKT	Pgam1
Rpl10a.1	3.51836e-85	-0.307711	0.992	0.999	3.45081e-81	NKT	Rpl10a
Prr13.1	6.13373e-85	0.258632	0.622	0.324	6.01597e-81	NKT	Prr13
Junb.1	7.31216e-83	0.386047	0.984	0.957	7.17177e-79	NKT	Junb
Rgs2.1	3.19678e-82	0.469078	0.609	0.357	3.1354e-78	NKT	Rgs2
H2-Q6.1	4.39998e-81	0.310255	0.766	0.487	4.3155e-77	NKT	H2-Q6
Rpl28	7.5465e-81	-0.316804	0.998	0.999	7.40161e-77	NKT	Rpl28
Pik3r1	1.80452e-80	0.288659	0.441	0.205	1.76987e-76	NKT	Pik3r1
Klf2.2	1.98119e-80	-0.358714	0.626	0.894	1.94315e-76	NKT	Klf2
Igfbp4.3	3.62537e-80	-0.556768	0.014	0.256	3.55576e-76	NKT	Igfbp4
Lef1.2	8.13578e-80	-0.404753	0.156	0.42	7.97957e-76	NKT	Lef1
Gnas	1.55967e-79	0.328269	0.817	0.612	1.52972e-75	NKT	Gnas
Rpl36a.1	3.19663e-79	-0.313573	0.995	0.997	3.13526e-75	NKT	Rpl36a
Rack1	1.87863e-78	-0.284013	0.972	0.988	1.84256e-74	NKT	Rack1
Sept9	1.29107e-77	0.266098	0.509	0.258	1.26628e-73	NKT	Sept9
Rps12	1.42543e-77	-0.306632	0.999	0.999	1.39807e-73	NKT	Rps12
Pdia3	2.19864e-76	0.296536	0.596	0.344	2.15642e-72	NKT	Pdia3
Ubb	4.13011e-76	0.281086	0.998	0.994	4.05081e-72	NKT	Ubb
Zap70	2.19623e-75	0.270203	0.514	0.27	2.15406e-71	NKT	Zap70
Rpl9	2.80438e-75	-0.306523	0.948	0.979	2.75053e-71	NKT	Rpl9
Dusp5	4.88978e-75	0.370072	0.671	0.428	4.7959e-71	NKT	Dusp5
Ndfip1	1.60178e-74	0.292379	0.669	0.415	1.57102e-70	NKT	Ndfip1
Rinl	3.36019e-72	0.259691	0.502	0.266	3.29567e-68	NKT	Rinl
Rpl15.1	2.63428e-71	-0.305015	0.994	0.996	2.5837e-67	NKT	Rpl15
Capzb.1	3.13229e-70	0.276505	0.717	0.478	3.07215e-66	NKT	Capzb
Arpc1b	7.17124e-70	0.282456	0.852	0.673	7.03355e-66	NKT	Arpc1b
Tmem59	7.87406e-70	0.262797	0.498	0.268	7.72288e-66	NKT	Tmem59
Npc2.1	2.80492e-69	-0.36846	0.604	0.746	2.75107e-65	NKT	Npc2
Rpl8.1	7.74362e-69	-0.25973	0.999	0.999	7.59494e-65	NKT	Rpl8
Klf6	1.06209e-67	0.364054	0.866	0.732	1.0417e-63	NKT	Klf6
Gpsm3	3.89068e-67	0.258363	0.642	0.398	3.81598e-63	NKT	Gpsm3
Rps18.1	6.86982e-66	-0.258765	0.997	0.999	6.73792e-62	NKT	Rps18
Adgre5	1.17245e-64	0.272998	0.602	0.364	1.14994e-60	NKT	Adgre5
H2-Q7.1	1.01377e-63	0.2737	0.931	0.796	9.94302e-60	NKT	H2-Q7
Gm8369.1	1.77081e-63	-0.340907	0.212	0.454	1.73681e-59	NKT	Gm8369
Actr3	8.00479e-59	0.267274	0.727	0.515	7.85109e-55	NKT	Actr3
Ctla2a.2	1.70788e-58	0.25385	0.415	0.204	1.67509e-54	NKT	Ctla2a
Epsti1.1	2.30589e-56	0.252596	0.577	0.351	2.26162e-52	NKT	Epsti1
Dapl1	3.99098e-56	-0.301821	0.006	0.181	3.91435e-52	NKT	Dapl1
Slc3a2	6.71226e-56	0.264876	0.623	0.405	6.58338e-52	NKT	Slc3a2
Ubc	5.36928e-55	0.300114	0.881	0.783	5.26619e-51	NKT	Ubc
Eif5a	1.66299e-54	0.274733	0.784	0.603	1.63106e-50	NKT	Eif5a
Eef1b2.1	1.75497e-54	-0.279163	0.969	0.984	1.72127e-50	NKT	Eef1b2
Nme2	2.06537e-53	-0.320589	0.713	0.806	2.02571e-49	NKT	Nme2
Rasgrp2	1.07361e-52	-0.270186	0.173	0.39	1.053e-48	NKT	Rasgrp2
Rflnb.2	6.5557e-51	-0.268941	0.093	0.291	6.42983e-47	NKT	Rflnb
H2-Q4	1.65376e-49	0.254571	0.757	0.564	1.62201e-45	NKT	H2-Q4
Rpl31	1.4206e-47	-0.252489	0.808	0.886	1.39333e-43	NKT	Rpl31
Rps17	7.6256e-47	-0.25608	0.79	0.874	7.47919e-43	NKT	Rps17
Jun.2	5.66397e-45	0.436673	0.745	0.586	5.55523e-41	NKT	Jun
Foxp1	1.37938e-44	-0.286432	0.257	0.444	1.35289e-40	NKT	Foxp1
H1f0	5.35389e-44	0.261343	0.213	0.085	5.25109e-40	NKT	H1f0
Rpl41	2.54067e-43	-0.257813	0.983	0.993	2.49189e-39	NKT	Rpl41
Rpl23a	1.71217e-42	-0.252119	0.917	0.947	1.6793e-38	NKT	Rpl23a
Crip1.1	4.67579e-41	-0.375205	0.859	0.942	4.58601e-37	NKT	Crip1
Ier2	4.74842e-41	0.404049	0.793	0.684	4.65725e-37	NKT	Ier2
Emb.1	2.08598e-39	-0.288514	0.377	0.558	2.04593e-35	NKT	Emb
Rgs10.1	3.41686e-39	-0.271325	0.2	0.375	3.35125e-35	NKT	Rgs10
mt-Co1	9.12424e-38	-0.269231	1	1	8.94906e-34	NKT	mt-Co1
Txnip.1	2.5784e-37	0.252701	0.734	0.553	2.5289e-33	NKT	Txnip
H2afz.1	6.33983e-37	-0.306747	0.589	0.698	6.21811e-33	NKT	H2afz
Rpl29	8.85216e-31	-0.350034	0.793	0.889	8.6822e-27	NKT	Rpl29
Dusp10.3	1.25377e-30	-0.281891	0.237	0.384	1.2297e-26	NKT	Dusp10
Cd69	1.54214e-30	0.265783	0.767	0.628	1.51253e-26	NKT	Cd69
mt-Nd4	4.16941e-29	-0.260185	0.851	0.889	4.08935e-25	NKT	mt-Nd4
Nr4a1.1	4.19715e-28	0.254055	0.444	0.298	4.11657e-24	NKT	Nr4a1
Emp3	1.93311e-26	-0.250208	0.322	0.464	1.89599e-22	NKT	Emp3
Satb1.2	3.93467e-24	-0.260269	0.345	0.472	3.85913e-20	NKT	Satb1
Pim1.3	1.61132e-23	-0.366296	0.392	0.507	1.58038e-19	NKT	Pim1
Ccl4.2	2.40858e-21	0.376909	0.325	0.206	2.36234e-17	NKT	Ccl4
Lars2	1.22145e-17	0.300717	0.892	0.867	1.198e-13	NKT	Lars2
Gzma.2	3.38376e-12	-0.832259	0.077	0.145	3.31879e-08	NKT	Gzma
Trbv1.2	6.04436e-09	0.42442	0.154	0.104	5.92831e-05	NKT	Trbv1
Cd8a.2	2.80372e-08	0.410157	0.353	0.337	0.000274989	NKT	Cd8a
