# Supplementary material for: The T Cell Receptor Immune Repertoire Protects the Liver From Reconsitution
Source: Front Immunol. 2020 Dec 18;11:584979. doi: 10.3389/fimmu.2020.584979 (PMC7775400; doi:10.3389/fimmu.2020.584979)
Supplement: Supplementary file 6 [file Table_5.xlsx]

## Sheet: Ctrl
	p_val_w6	avg_logFC_w6	pct.1_w6	pct.2_w6	p_val_adj_w6	p_val_w12	avg_logFC_w12	pct.1_w12	pct.2_w12	p_val_adj_w12	sumFC	gene
1	0	1.51174	0.708	0.024	0	0	1.4993	0.708	0.011	0	3.01105	Gm8797
2	0	1.31463	0.422	0	0	4.51121e-301	1.3151	0.422	0	4.46655e-297	2.62973	Xist
3	2.75592e-278	0.80777	0.746	0.383	2.72863e-274	0	1.65779	0.746	0.072	0	2.46556	Ly6a
4	2.15538e-66	0.848813	0.172	0.055	2.13404e-62	9.16586e-85	1.40453	0.172	0.016	9.07511e-81	2.25335	Trbv1
5	4.79681e-17	0.876987	0.336	0.294	4.74932e-13	5.57962e-76	1.16474	0.336	0.14	5.52439e-72	2.04172	Gzmb
6	8.77527e-13	0.319459	0.495	0.428	8.68839e-09	2.89911e-204	1.56477	0.495	0.121	2.87041e-200	1.88423	Cd7
7	3.61318e-215	0.599158	0.899	0.694	3.57741e-211	0	1.01065	0.899	0.338	0	1.6098	Fos
8	1.04804e-253	0.389155	0.983	0.954	1.03767e-249	0	1.15262	0.983	0.624	0	1.54178	Rpl14
9	1.07882e-140	0.699974	0.322	0.104	1.06814e-136	2.06952e-148	0.723352	0.322	0.043	2.04903e-144	1.42333	Rcbtb2
10	0	0.496541	0.97	0.895	0	0	0.891319	0.97	0.535	0	1.38786	Eef2
11	2.33968e-115	0.457703	0.919	0.783	2.31652e-111	6.32624e-190	0.842175	0.919	0.503	6.26361e-186	1.29988	Lars2
12	0	0.699165	0.979	0.865	0	1.81131e-281	0.600356	0.979	0.665	1.79337e-277	1.29952	Hspa8
13	9.63229e-81	0.273123	0.992	0.979	9.53693e-77	0	0.99305	0.992	0.854	0	1.26617	Rplp0
14	8.53614e-227	0.723976	0.69	0.365	8.45164e-223	6.91994e-161	0.488708	0.69	0.254	6.85144e-157	1.21268	Cebpb
15	8.4593e-108	0.63095	0.769	0.591	8.37555e-104	2.1104e-142	0.556459	0.769	0.371	2.08951e-138	1.18741	Jun
16	1.94968e-89	0.333182	0.575	0.347	1.93038e-85	0	0.795749	0.575	0.061	0	1.12893	Rnf187
17	1.59862e-76	0.347018	0.608	0.406	1.5828e-72	3.7503e-281	0.7701	0.608	0.111	3.71317e-277	1.11712	Ccnd3
18	4.51779e-08	0.254974	0.197	0.157	0.000447306	1.06833e-21	0.851162	0.197	0.118	1.05776e-17	1.10614	Fcer1g
19	6.70678e-51	0.441162	0.39	0.244	6.64039e-47	4.93911e-130	0.629891	0.39	0.097	4.89021e-126	1.07105	Rhob
20	1.32328e-41	0.355083	0.353	0.217	1.31018e-37	9.6638e-107	0.684934	0.353	0.097	9.56813e-103	1.04002	Xcl1
21	0	0.398785	0.998	0.988	0	0	0.555641	0.998	0.981	0	0.954426	Eef1a1
22	4.11656e-90	0.254772	0.996	0.989	4.0758e-86	0	0.68613	0.996	0.895	0	0.940902	H3f3b
23	2.42319e-42	0.324884	0.767	0.635	2.3992e-38	2.62066e-122	0.591905	0.767	0.38	2.59471e-118	0.916789	Ifi27l2a
24	7.60142e-106	0.456368	0.8	0.6	7.52617e-102	3.99942e-137	0.45097	0.8	0.381	3.95982e-133	0.907338	Zfp36
25	8.67192e-45	0.436349	0.4	0.25	8.58607e-41	1.34264e-29	0.456841	0.4	0.239	1.32935e-25	0.89319	Egr1
26	2.13889e-120	0.256151	0.986	0.952	2.11772e-116	0	0.635175	0.986	0.768	0	0.891326	Rpl3
27	8.02085e-132	0.383056	0.849	0.65	7.94145e-128	1.07969e-185	0.485377	0.849	0.348	1.069e-181	0.868432	Gnas
28	1.92485e-172	0.404824	0.958	0.855	1.90579e-168	2.43772e-152	0.450043	0.958	0.598	2.41358e-148	0.854867	Pnrc1
29	4.71541e-250	0.396463	0.992	0.965	4.66872e-246	1.71856e-196	0.432894	0.992	0.832	1.70154e-192	0.829357	Fth1
30	2.90425e-80	0.326098	0.65	0.445	2.8755e-76	1.06925e-206	0.499249	0.65	0.179	1.05866e-202	0.825347	H2-T22
31	7.38218e-96	0.429095	0.356	0.157	7.3091e-92	2.32595e-107	0.327863	0.356	0.089	2.30293e-103	0.756959	Socs1
32	2.85008e-268	0.395455	0.998	0.991	2.82186e-264	2.42193e-88	0.267008	0.998	0.945	2.39795e-84	0.662463	H2-D1
33	4.23596e-67	0.271545	0.81	0.645	4.19402e-63	1.21871e-135	0.351854	0.81	0.339	1.20664e-131	0.623399	Eif5a
34	8.35626e-66	0.260737	0.646	0.453	8.27354e-62	2.11265e-173	0.357204	0.646	0.196	2.09174e-169	0.617941	Gpi1
35	6.6886e-72	0.318998	0.114	0.017	6.62238e-68	1.18994e-53	0.297201	0.114	0.009	1.17816e-49	0.6162	Ccdc136
36	8.54479e-65	0.32917	0.415	0.235	8.4602e-61	1.02405e-114	0.284856	0.415	0.115	1.01391e-110	0.614026	Dnajb1
37	1.81072e-87	0.341539	0.243	0.082	1.79279e-83	6.62181e-86	0.250815	0.243	0.046	6.55625e-82	0.592354	1810041H14Rik

## Sheet: 4 W
	p_val_c	avg_logFC_c	pct.1_w6	pct.2_c	p_val_adj_c	p_val_w12	avg_logFC_w12	pct.1_w12	pct.2_w12	p_val_adj_w12	sumFC	gene
1	0	-1.25552	0.813	0.967	0	0	2.51427	0.967	0.149	0	3.76979	Rpl29
2	1.82892e-130	-1.03343	0.558	0.759	1.81081e-126	2.28082e-237	2.05744	0.759	0.381	2.25824e-233	3.09087	Ccl5
3	1.33067e-92	-1.10952	0.206	0.366	1.31749e-88	5.90993e-172	1.5425	0.366	0.057	5.85142e-168	2.65202	Ly6c2
4	4.01044e-243	-0.526829	0.959	0.984	3.97073e-239	0	1.86072	0.984	0.381	0	2.38755	Cd52
5	1.30461e-104	-0.745265	0.358	0.531	1.29169e-100	2.63129e-237	1.34523	0.531	0.118	2.60524e-233	2.09049	Cd8b1
6	1.01224e-302	-0.826029	0.614	0.828	1.00222e-298	0	1.23794	0.828	0.205	0	2.06397	Ms4a4b
7	6.48887e-149	-0.877978	0.271	0.496	6.42463e-145	2.42802e-195	0.990461	0.496	0.108	2.40399e-191	1.86844	Klrd1
8	3.09037e-49	-0.499949	0.649	0.723	3.05977e-45	9.33836e-255	1.30032	0.723	0.296	9.24591e-251	1.80027	Nkg7
9	9.2895e-64	-0.262946	0.899	0.922	9.19753e-60	0	1.48598	0.922	0.24	0	1.74893	Sh3bgrl3
10	2.40047e-36	-0.499256	0.541	0.591	2.37671e-32	2.69103e-205	1.2313	0.591	0.187	2.66439e-201	1.73056	Lgals1
11	6.23527e-33	-0.677077	0.156	0.254	6.17354e-29	2.3071e-37	1.05345	0.254	0.123	2.28426e-33	1.73053	Gzma
12	4.92748e-55	-0.372458	0.783	0.808	4.8787e-51	0	1.31309	0.808	0.236	0	1.68555	Ly6e
13	4.0605e-62	-0.409858	0.603	0.69	4.0203e-58	0	1.19505	0.69	0.147	0	1.60491	S100a11
14	1.27058e-108	-0.524052	0.504	0.653	1.258e-104	4.1226e-295	0.994939	0.653	0.136	4.08179e-291	1.51899	Emp3
15	6.93375e-65	-0.327982	0.782	0.834	6.8651e-61	0	1.10167	0.834	0.23	0	1.42965	Cyba
16	2.9131e-64	-0.612778	0.083	0.199	2.88426e-60	1.2778e-80	0.710381	0.199	0.03	1.26515e-76	1.32316	Gzmk
17	2.92663e-66	-0.419078	0.412	0.54	2.89766e-62	7.00879e-237	0.8469	0.54	0.097	6.93941e-233	1.26598	Gm8369
18	1.51293e-24	-0.264527	0.824	0.84	1.49795e-20	1.01703e-250	0.968219	0.84	0.373	1.00696e-246	1.23275	AW112010
19	6.85351e-45	-0.29855	0.501	0.582	6.78566e-41	2.53035e-277	0.824555	0.582	0.097	2.5053e-273	1.1231	Psmb3
20	1.01458e-21	-0.283555	0.449	0.493	1.00453e-17	8.99561e-233	0.836598	0.493	0.075	8.90656e-229	1.12015	Dnajc15
21	3.26187e-145	-0.537867	0.563	0.743	3.22958e-141	1.58444e-155	0.53347	0.743	0.299	1.56875e-151	1.07134	Thy1
22	6.03158e-52	-0.559993	0.037	0.118	5.97187e-48	2.90542e-35	0.446587	0.118	0.029	2.87665e-31	1.00658	Klrb1c
23	1.76273e-32	-0.31022	0.512	0.57	1.74528e-28	2.2348e-204	0.691057	0.57	0.135	2.21268e-200	1.00128	Cd2
24	9.62038e-43	-0.413355	0.314	0.418	9.52514e-39	4.82368e-139	0.585225	0.418	0.102	4.77593e-135	0.99858	Cd48
25	7.24702e-15	-0.364532	0.082	0.129	7.17527e-11	1.88878e-51	0.625991	0.129	0.019	1.87008e-47	0.990523	Ly6d
26	1.21023e-27	-0.36717	0.129	0.214	1.19825e-23	2.93213e-49	0.607576	0.214	0.071	2.9031e-45	0.974746	Ccl3
27	1.27873e-46	-0.314433	0.397	0.503	1.26607e-42	3.28894e-210	0.654574	0.503	0.093	3.25638e-206	0.969008	Rbx1
28	2.55538e-29	-0.313321	0.285	0.368	2.53008e-25	8.41126e-157	0.644788	0.368	0.059	8.32799e-153	0.958109	Pycard
29	3.92829e-66	-0.330635	0.607	0.667	3.8894e-62	3.06106e-205	0.625169	0.667	0.2	3.03076e-201	0.955803	Snrpf
30	6.24034e-37	-0.295273	0.583	0.64	6.17856e-33	2.97184e-203	0.640479	0.64	0.179	2.94242e-199	0.935753	Ms4a6b
31	2.58023e-40	-0.327486	0.292	0.389	2.55469e-36	2.2038e-169	0.60698	0.389	0.058	2.18198e-165	0.934466	Mettl23
32	3.29871e-10	-0.299723	0.095	0.135	3.26606e-06	1.88887e-46	0.622038	0.135	0.028	1.87017e-42	0.921761	Iglc2
33	4.26605e-09	-0.287855	0.142	0.179	4.22381e-05	1.35628e-80	0.624018	0.179	0.019	1.34286e-76	0.911873	Dapl1
34	7.6796e-13	-0.341021	0.257	0.307	7.60357e-09	9.9573e-81	0.558757	0.307	0.09	9.85873e-77	0.899778	Cxcr6
35	9.83066e-17	-0.29814	0.25	0.319	9.73334e-13	2.4212e-05	0.581747	0.319	0.25	0.239723	0.879887	Cd74
36	2.76545e-43	-0.363681	0.566	0.625	2.73808e-39	4.03773e-146	0.49963	0.625	0.213	3.99776e-142	0.86331	Arl6ip1
37	5.28928e-60	-0.323242	0.615	0.689	5.23692e-56	1.36881e-190	0.53249	0.689	0.217	1.35526e-186	0.855732	Dad1
38	1.99908e-74	-0.287082	0.836	0.864	1.97929e-70	6.32088e-167	0.566366	0.864	0.431	6.2583e-163	0.853449	H3f3a
39	1.42459e-58	-0.351629	0.121	0.248	1.41048e-54	8.46588e-108	0.498152	0.248	0.032	8.38206e-104	0.849781	Arhgap31
40	2.20282e-41	-0.335567	0.103	0.198	2.18101e-37	1.129e-94	0.510761	0.198	0.019	1.11782e-90	0.846327	Hist1h1e
41	3.44346e-21	-0.271746	0.231	0.297	3.40937e-17	5.94239e-129	0.556153	0.297	0.04	5.88356e-125	0.827898	Sh2d1a
42	2.79864e-26	-0.346615	0.055	0.113	2.77093e-22	6.2024e-51	0.440952	0.113	0.012	6.14099e-47	0.787567	Iglc3
43	1.74924e-188	-0.432586	0.991	0.996	1.73193e-184	9.36036e-72	0.313302	0.996	0.898	9.26769e-68	0.745889	H2-K1
44	2.76341e-11	-0.305165	0.107	0.153	2.73605e-07	5.85604e-10	0.406997	0.153	0.101	5.79807e-06	0.712162	Cd79a
45	1.20507e-17	-0.269885	0.27	0.329	1.19314e-13	2.85893e-101	0.434565	0.329	0.081	2.83062e-97	0.704451	Cmtm7
46	5.437e-114	-0.314404	0.989	0.99	5.38318e-110	1.09021e-116	0.36851	0.99	0.872	1.07941e-112	0.682914	Actb
47	1.39187e-39	-0.360479	0.468	0.578	1.3781e-35	3.57034e-33	0.313055	0.578	0.399	3.53499e-29	0.673534	S100a6
48	4.58385e-11	-0.272771	0.123	0.166	4.53847e-07	1.59911e-46	0.398231	0.166	0.043	1.58328e-42	0.671002	Klre1
49	4.56491e-30	-0.296199	0.35	0.433	4.51972e-26	4.37423e-88	0.295357	0.433	0.151	4.33093e-84	0.591556	Slfn2
50	9.72362e-37	-0.31342	0.586	0.639	9.62735e-33	9.14723e-78	0.270852	0.639	0.299	9.05667e-74	0.584272	Gimap5
51	1.11463e-30	-0.27318	0.174	0.261	1.10359e-26	3.51862e-68	0.253453	0.261	0.073	3.48379e-64	0.526633	Atp6v1d
52	5.00906e-34	-0.26251	0.431	0.514	4.95947e-30	7.19938e-93	0.26364	0.514	0.192	7.1281e-89	0.52615	Prdx1

## Sheet: 8 W
	p_val_c	avg_logFC_c	pct.1_c	pct.2_c	p_val_adj_c	p_val_w6	avg_logFC_w6	pct.1_w6	pct.2_w6	p_val_adj_w6	sumFC	gene
1	2.40168e-256	-1.51379	0.526	0.693	2.3779e-252	0	-1.72625	0.394	0.693	0	3.24004	Pim1
2	0	-1.60514	0.127	0.499	0	1.47418e-266	-1.4806	0.156	0.499	1.45958e-262	3.08574	Gm11808
3	0	-1.46264	0.541	0.764	0	0	-1.47175	0.461	0.764	0	2.9344	Fus
4	2.96743e-177	-1.36633	0.265	0.492	2.93806e-173	1.53917e-245	-1.52355	0.165	0.492	1.52393e-241	2.88988	Kdm6b
5	0	-1.39515	0.603	0.774	0	0	-1.45202	0.496	0.774	0	2.84716	Clk1
6	5.45099e-196	-1.44019	0.278	0.515	5.39703e-192	5.702e-185	-1.38331	0.261	0.515	5.64555e-181	2.8235	Gm47283
7	2.73139e-209	-1.3577	0.259	0.512	2.70435e-205	1.42081e-229	-1.40296	0.207	0.512	1.40674e-225	2.76066	Sod1
8	1.97903e-258	-1.28449	0.542	0.691	1.95944e-254	3.3782e-287	-1.36282	0.434	0.691	3.34475e-283	2.64731	Ccnl1
9	0	-1.14731	0.702	0.831	0	0	-1.45076	0.525	0.831	0	2.59807	Nfkbia
10	3.37803e-141	-1.16722	0.46	0.572	3.34459e-137	6.42181e-213	-1.35296	0.307	0.572	6.35824e-209	2.52018	Gpr132
11	2.27761e-163	-1.22108	0.334	0.522	2.25506e-159	7.62581e-190	-1.2534	0.262	0.522	7.55031e-186	2.47448	Hnrnpa0
12	5.77279e-86	-1.14175	0.209	0.36	5.71564e-82	1.08067e-154	-1.31648	0.117	0.36	1.06997e-150	2.45824	Irs2
13	7.37161e-91	-1.20487	0.229	0.383	7.29863e-87	4.71827e-118	-1.25266	0.176	0.383	4.67156e-114	2.45753	Tob2
14	2.49108e-290	-0.975244	0.87	0.837	2.46641e-286	0	-1.34884	0.688	0.837	0	2.32409	Tra2b
15	1.3451e-53	-1.17513	0.176	0.293	1.33179e-49	5.08099e-55	-1.12926	0.163	0.293	5.03069e-51	2.30439	Rora
16	3.96099e-82	-1.02114	0.395	0.48	3.92177e-78	1.49747e-155	-1.2303	0.248	0.48	1.48264e-151	2.25144	Per1
17	0	-1.03137	0.897	0.894	0	0	-1.16111	0.809	0.894	0	2.19249	Tnfaip3
18	3.54963e-36	-1.02387	0.254	0.33	3.51449e-32	5.7184e-82	-1.16062	0.16	0.33	5.66178e-78	2.18449	Gadd45b
19	1.11622e-91	-0.983711	0.534	0.564	1.10517e-87	1.03728e-156	-1.19232	0.374	0.564	1.02701e-152	2.17603	Zc3hav1
20	6.54318e-227	-1.06563	0.016	0.242	6.4784e-223	1.42185e-231	-1.10852	0.001	0.242	1.40778e-227	2.17416	Gm12355
21	5.50244e-105	-1.05218	0.434	0.528	5.44797e-101	1.05976e-118	-1.07595	0.378	0.528	1.04927e-114	2.12813	Hnrnph1
22	8.59571e-66	-0.968546	0.132	0.265	8.51062e-62	1.83921e-161	-1.1495	0.042	0.265	1.821e-157	2.11805	Nr4a3
23	2.93803e-126	-1.04274	0.506	0.577	2.90894e-122	3.98047e-146	-1.07261	0.422	0.577	3.94106e-142	2.11535	Ptp4a2
24	0	-1.11222	0.889	0.881	0	0	-0.995581	0.86	0.881	0	2.1078	mt-Nd4
25	4.86574e-65	-0.957278	0.482	0.508	4.81757e-61	7.80847e-122	-1.14598	0.338	0.508	7.73117e-118	2.10326	Smad7
26	2.67798e-72	-0.98191	0.45	0.499	2.65147e-68	3.13345e-110	-1.0908	0.345	0.499	3.10243e-106	2.07271	Klf13
27	4.56335e-47	-0.854248	0.527	0.543	4.51817e-43	2.8609e-117	-1.20849	0.373	0.543	2.83258e-113	2.06274	Rgs2
28	2.63733e-41	-0.899468	0.308	0.373	2.61122e-37	3.11624e-121	-1.13737	0.161	0.373	3.08539e-117	2.03684	Zc3h12a
29	2.68822e-70	-1.0699	0.102	0.238	2.66161e-66	4.81459e-51	-0.96684	0.116	0.238	4.76693e-47	2.03674	Nfkbid
30	1.70796e-82	-0.987345	0.547	0.566	1.69106e-78	3.19474e-104	-1.04432	0.46	0.566	3.16311e-100	2.03166	Cd28
31	1.67245e-16	-0.746411	0.575	0.506	1.65589e-12	2.47656e-99	-1.28445	0.355	0.506	2.45204e-95	2.03086	Gm26917
32	2.29182e-115	-1.06295	0.063	0.234	2.26913e-111	1.17281e-86	-0.967099	0.073	0.234	1.1612e-82	2.03004	Klf10
33	2.67491e-43	-1.00399	0.342	0.394	2.64843e-39	6.22893e-61	-1.02484	0.282	0.394	6.16727e-57	2.02883	Gramd3
34	2.48771e-77	-0.965935	0.413	0.487	2.46308e-73	2.34224e-112	-1.05411	0.318	0.487	2.31906e-108	2.02004	Ddx3x
35	2.73334e-64	-0.819878	0.597	0.567	2.70628e-60	3.46886e-160	-1.17716	0.377	0.567	3.43451e-156	1.99704	Atf4
36	1.47773e-234	-0.715946	0.982	0.955	1.4631e-230	0	-1.2765	0.89	0.955	0	1.99245	Jund
37	3.12922e-155	-1.00867	0.041	0.234	3.09824e-151	3.4377e-119	-0.974164	0.05	0.234	3.40367e-115	1.98284	Wdr89
38	3.40591e-69	-1.00524	0.275	0.388	3.37219e-65	9.4817e-75	-0.975221	0.246	0.388	9.38783e-71	1.98046	BC005537
39	1.2263e-26	-0.883391	0.394	0.421	1.21416e-22	2.43298e-48	-1.0623	0.33	0.421	2.4089e-44	1.94569	Bhlhe40
40	8.13919e-43	-0.884101	0.213	0.305	8.05862e-39	3.6233e-104	-1.05584	0.115	0.305	3.58743e-100	1.93994	Elmsan1
41	2.00567e-69	-0.951772	0.137	0.275	1.98582e-65	4.67129e-94	-0.97946	0.098	0.275	4.62504e-90	1.93123	Skil
42	5.10643e-62	-0.968979	0.213	0.333	5.05588e-58	3.52401e-73	-0.96108	0.181	0.333	3.48912e-69	1.93006	Irf2bp2
43	2.13806e-25	-0.854445	0.226	0.284	2.11689e-21	1.52106e-83	-1.04731	0.118	0.284	1.50601e-79	1.90176	Fosl2
44	1.47727e-136	-0.806299	0.746	0.709	1.46265e-132	5.73021e-225	-1.08409	0.563	0.709	5.67348e-221	1.89039	Hspa5
45	2.26175e-24	-0.838162	0.301	0.335	2.23936e-20	7.41145e-90	-1.05151	0.16	0.335	7.33808e-86	1.88967	Il4ra
46	2.81453e-32	-0.894621	0.469	0.458	2.78667e-28	1.1431e-54	-0.989957	0.385	0.458	1.13178e-50	1.88458	Satb1
47	7.01077e-46	-0.888325	0.27	0.353	6.94136e-42	2.45089e-79	-0.973377	0.195	0.353	2.42663e-75	1.8617	Mef2d
48	0	-0.792644	0.977	0.95	0	0	-1.06671	0.919	0.95	0	1.85936	Btg1
49	2.68668e-61	-0.881077	0.51	0.516	2.66008e-57	2.32692e-98	-0.976641	0.388	0.516	2.30389e-94	1.85772	Ythdc1
50	2.65853e-47	-1.07131	0.336	0.401	2.63222e-43	6.62438e-27	-0.784822	0.362	0.401	6.5588e-23	1.85614	Odc1
51	1.34631e-40	-0.903048	0.259	0.336	1.33298e-36	1.18676e-64	-0.94971	0.198	0.336	1.17501e-60	1.85276	Nfkb1
52	6.4808e-17	-0.764044	0.396	0.381	6.41664e-13	4.53925e-91	-1.08473	0.209	0.381	4.49431e-87	1.84878	Ifrd1
53	4.68455e-95	-0.872826	0.62	0.601	4.63817e-91	1.75266e-128	-0.968529	0.5	0.601	1.73531e-124	1.84136	Eif4g2
54	6.85984e-42	-0.892547	0.256	0.341	6.79193e-38	4.3658e-65	-0.930971	0.197	0.341	4.32258e-61	1.82352	Nfkbiz
55	1.08822e-50	-0.891484	0.408	0.456	1.07744e-46	6.02998e-69	-0.909438	0.339	0.456	5.97028e-65	1.80092	Slc38a2
56	1.29454e-41	-0.852899	0.197	0.291	1.28172e-37	2.4983e-80	-0.947014	0.128	0.291	2.47356e-76	1.79991	Wsb1
57	1.60389e-63	-0.929341	0.167	0.297	1.58801e-59	3.04859e-56	-0.870465	0.167	0.297	3.01841e-52	1.79981	Birc2
58	3.60808e-12	-0.719189	0.332	0.33	3.57236e-08	4.01053e-87	-1.07304	0.158	0.33	3.97083e-83	1.79223	Csrnp1
59	5.18792e-44	-0.892499	0.194	0.292	5.13656e-40	1.18342e-56	-0.897506	0.161	0.292	1.1717e-52	1.79001	Rel
60	5.2022e-268	-1.46956	0.166	0.482	5.15069e-264	0.0050469	-0.312453	0.628	0.482	1	1.78202	mt-Nd3
61	1.01508e-53	-0.854252	0.517	0.507	1.00503e-49	2.2708e-82	-0.920754	0.412	0.507	2.24832e-78	1.77501	Mcl1
62	4.63342e-30	-0.844937	0.422	0.423	4.58755e-26	1.3336e-57	-0.908536	0.319	0.423	1.3204e-53	1.75347	Wnk1
63	2.72634e-14	-0.780111	0.306	0.314	2.69935e-10	9.48669e-58	-0.949885	0.184	0.314	9.39277e-54	1.73	Hexim1
64	5.66026e-44	-0.747545	0.11	0.211	5.60422e-40	1.34122e-193	-0.981668	0.003	0.211	1.32794e-189	1.72921	Eif3j2
65	4.39138e-31	-0.825411	0.151	0.233	4.3479e-27	2.6405e-56	-0.895338	0.105	0.233	2.61435e-52	1.72075	Rnf19b
66	1.1848e-33	-0.853725	0.2	0.279	1.17307e-29	1.15419e-47	-0.864392	0.162	0.279	1.14276e-43	1.71812	Purb
67	4.20805e-65	-1.03697	0.185	0.315	4.16639e-61	3.75517e-11	-0.648868	0.303	0.315	3.71799e-07	1.68584	Cxcr4
68	1.93777e-13	-0.761152	0.469	0.438	1.91859e-09	2.13445e-30	-0.920137	0.398	0.438	2.11332e-26	1.68129	Ccr7
69	8.96612e-38	-0.84574	0.142	0.235	8.87735e-34	7.52665e-55	-0.825795	0.107	0.235	7.45213e-51	1.67153	Kdm2b
70	2.34115e-44	-0.801183	0.062	0.155	2.31797e-40	2.43962e-67	-0.862871	0.037	0.155	2.41547e-63	1.66405	Lmna
71	0	-0.826711	0.979	0.954	0	0	-0.82341	0.961	0.954	0	1.65012	mt-Atp6
72	3.66872e-25	-0.822137	0.283	0.33	3.6324e-21	3.26343e-31	-0.819625	0.255	0.33	3.23112e-27	1.64176	Hif1a
73	1.39172e-39	-0.842828	0.196	0.287	1.37795e-35	3.53786e-42	-0.782616	0.179	0.287	3.50284e-38	1.62544	Gls
74	1.43457e-22	-0.869321	0.182	0.244	1.42037e-18	5.61744e-15	-0.737009	0.195	0.244	5.56182e-11	1.60633	Nrip1
75	0	-0.890563	0.975	0.957	0	0	-0.707683	0.961	0.957	0	1.59825	Rpl41
76	1.13845e-31	-0.803286	0.377	0.4	1.12718e-27	1.03642e-39	-0.783069	0.334	0.4	1.02616e-35	1.58635	Nxf1
77	1.59597e-20	-0.752278	0.25	0.292	1.58017e-16	2.72296e-48	-0.831681	0.174	0.292	2.696e-44	1.58396	Ppp2ca
78	3.24488e-18	-0.701874	0.398	0.383	3.21276e-14	2.82514e-60	-0.874336	0.263	0.383	2.79718e-56	1.57621	Taf1d
79	1.66588e-53	-0.774314	0.529	0.517	1.64938e-49	1.78988e-67	-0.800597	0.46	0.517	1.77216e-63	1.57491	Srsf3
80	4.85908e-140	-0.809522	0.787	0.727	4.81098e-136	5.19847e-127	-0.765284	0.737	0.727	5.14701e-123	1.57481	Stk17b
81	2.40828e-26	-0.778332	0.381	0.389	2.38444e-22	2.20883e-40	-0.786569	0.318	0.389	2.18697e-36	1.5649	Hnrnpc
82	1.46652e-20	-0.752143	0.279	0.314	1.45201e-16	2.16251e-35	-0.809103	0.228	0.314	2.1411e-31	1.56125	Slc38a1
83	0	-0.979148	0.974	0.967	0	2.11692e-232	-0.569492	0.966	0.967	2.09596e-228	1.54864	Rpl35a
84	1.15424e-38	-0.805726	0.444	0.448	1.14281e-34	7.43195e-43	-0.737739	0.399	0.448	7.35838e-39	1.54347	Snrnp70
85	4.44106e-34	-0.795445	0.161	0.247	4.3971e-30	1.20705e-32	-0.732616	0.155	0.247	1.1951e-28	1.52806	Aebp2
86	0	-0.823811	0.999	1	0	0	-0.70336	1	1	0	1.52717	mt-Co1
87	8.25935e-18	-0.67485	0.471	0.427	8.17759e-14	5.48954e-56	-0.847377	0.333	0.427	5.43519e-52	1.52223	Srsf7
88	3.07944e-20	-0.742497	0.232	0.278	3.04895e-16	1.29778e-37	-0.771934	0.179	0.278	1.28493e-33	1.51443	Safb2
89	6.26625e-26	-0.743824	0.189	0.255	6.20421e-22	2.34562e-39	-0.766711	0.152	0.255	2.3224e-35	1.51054	Gnl3
90	1.85431e-26	-0.630747	0.657	0.539	1.83595e-22	2.28151e-77	-0.864576	0.477	0.539	2.25892e-73	1.49532	Hsp90aa1
91	1.1402e-28	-0.671878	0.643	0.527	1.12892e-24	3.51691e-62	-0.8217	0.505	0.527	3.4821e-58	1.49358	Dazap2
92	6.89038e-26	-0.724959	0.136	0.208	6.82217e-22	2.61133e-45	-0.767558	0.098	0.208	2.58548e-41	1.49252	Wdr45b
93	1.14838e-14	-0.719057	0.196	0.236	1.13701e-10	2.19697e-29	-0.76916	0.152	0.236	2.17522e-25	1.48822	Birc3
94	1.2204e-08	-0.672125	0.339	0.318	0.000120832	2.44002e-40	-0.814967	0.22	0.318	2.41587e-36	1.48709	Arid5a
95	4.1713e-30	-0.750475	0.135	0.215	4.13e-26	8.64152e-34	-0.733364	0.122	0.215	8.55597e-30	1.48384	Tgif1
96	9.57867e-42	-0.724894	0.045	0.127	9.48384e-38	5.72475e-66	-0.754095	0.023	0.127	5.66808e-62	1.47899	Ramp3
97	0.000187407	-0.620019	0.405	0.362	1	1.5376e-38	-0.85705	0.263	0.362	1.52238e-34	1.47707	Nr4a1
98	5.98854e-243	-0.676636	0.928	0.877	5.92926e-239	5.1833e-286	-0.797892	0.871	0.877	5.13198e-282	1.47453	Rpl23a
99	1.92044e-19	-0.818086	0.277	0.31	1.90143e-15	4.53404e-13	-0.656379	0.285	0.31	4.48915e-09	1.47446	Atp2b1
100	5.8241e-264	-0.706519	0.96	0.91	5.76644e-260	3.67744e-273	-0.766473	0.919	0.91	3.64103e-269	1.47299	mt-Nd2
101	8.78726e-10	-0.663035	0.374	0.347	8.70027e-06	3.34391e-42	-0.803985	0.25	0.347	3.31081e-38	1.46702	Tgoln1
102	6.48102e-36	-0.717259	0.076	0.159	6.41686e-32	2.00867e-54	-0.748991	0.051	0.159	1.98879e-50	1.46625	Nr1d2
103	5.1035e-34	-0.683362	0.083	0.165	5.05298e-30	1.26168e-87	-0.778964	0.03	0.165	1.24919e-83	1.46233	H2-Q10
104	2.523e-09	-0.676215	0.309	0.302	2.49802e-05	1.2752e-33	-0.785446	0.216	0.302	1.26257e-29	1.46166	Pcna
105	1.95137e-18	-0.783675	0.299	0.321	1.93205e-14	4.68946e-17	-0.676831	0.287	0.321	4.64303e-13	1.46051	Csde1
106	2.0035e-32	-0.690865	0.574	0.505	1.98367e-28	4.55068e-56	-0.769579	0.466	0.505	4.50563e-52	1.46044	Hnrnpdl
107	7.28344e-55	-0.768415	0.094	0.209	7.21133e-51	3.3754e-38	-0.687931	0.108	0.209	3.34198e-34	1.45635	Gtf3c2
108	3.67562e-12	-0.641229	0.203	0.235	3.63923e-08	1.73095e-55	-0.813225	0.108	0.235	1.71381e-51	1.45445	Fbxo33
109	2.81505e-12	-0.656683	0.148	0.189	2.78718e-08	2.41587e-53	-0.797257	0.073	0.189	2.39195e-49	1.45394	Snx18
110	4.36271e-25	-0.758143	0.179	0.246	4.31952e-21	4.50999e-25	-0.688934	0.171	0.246	4.46534e-21	1.44708	Rbbp6
111	3.27598e-09	-0.688722	0.32	0.312	3.24355e-05	2.84719e-28	-0.758115	0.238	0.312	2.819e-24	1.44684	Malt1
112	7.88548e-07	-0.633796	0.438	0.374	0.00780741	4.18389e-40	-0.809709	0.29	0.374	4.14247e-36	1.4435	Itpkb
113	1.11561e-21	-0.744524	0.165	0.226	1.10456e-17	1.10524e-22	-0.695059	0.155	0.226	1.09429e-18	1.43958	Usp7
114	2.63962e-16	-0.691405	0.154	0.204	2.61349e-12	1.80526e-41	-0.745832	0.099	0.204	1.78739e-37	1.43724	Kpna1
115	4.52343e-27	-0.702654	0.119	0.194	4.47865e-23	1.01364e-47	-0.73442	0.083	0.194	1.0036e-43	1.43707	Slc25a36
116	3.03652e-23	-0.737757	0.363	0.372	3.00646e-19	1.43944e-29	-0.694595	0.321	0.372	1.42519e-25	1.43235	Eif3a
117	8.18723e-304	-0.706891	0.972	0.928	8.10618e-300	9.36895e-293	-0.724386	0.949	0.928	9.2762e-289	1.43128	mt-Nd1
118	4.2177e-21	-0.75312	0.188	0.245	4.17595e-17	5.65648e-18	-0.677871	0.19	0.245	5.60048e-14	1.43099	Leng8
119	5.2537e-53	-0.722883	0.609	0.554	5.20168e-49	9.83716e-59	-0.707813	0.548	0.554	9.73977e-55	1.4307	Ncl
120	5.53506e-13	-0.682722	0.174	0.212	5.48026e-09	5.91075e-32	-0.738353	0.123	0.212	5.85224e-28	1.42108	Mepce
121	1.40075e-16	-0.70725	0.175	0.222	1.38688e-12	1.22871e-29	-0.711912	0.137	0.222	1.21655e-25	1.41916	Ski
122	3.33723e-05	-0.667781	0.23	0.232	0.330419	4.7167e-21	-0.749248	0.165	0.232	4.67001e-17	1.41703	Cd44
123	3.83581e-103	-0.632899	0.855	0.746	3.79784e-99	7.38269e-147	-0.783193	0.752	0.746	7.3096e-143	1.41609	Srsf5
124	6.67853e-09	-0.604926	0.516	0.42	6.61241e-05	5.5786e-42	-0.804714	0.364	0.42	5.52338e-38	1.40964	Pdcd4
125	0.00242121	-0.587126	0.213	0.207	1	2.21206e-44	-0.820273	0.099	0.207	2.19016e-40	1.4074	Sgms1
126	2.51616e-09	-0.531958	0.596	0.483	2.49125e-05	2.0876e-66	-0.87242	0.389	0.483	2.06693e-62	1.40438	Slc3a2
127	6.6553e-265	-0.842306	0.857	0.81	6.58941e-261	9.68751e-130	-0.558664	0.853	0.81	9.5916e-126	1.40097	Rpl10
128	2.78174e-06	-0.482909	0.668	0.513	0.0275421	1.25009e-71	-0.913374	0.43	0.513	1.23772e-67	1.39628	Ier5
129	0	-0.580361	0.995	0.995	0	0	-0.815484	0.988	0.995	0	1.39584	Rps29
130	1.27814e-19	-0.704367	0.233	0.279	1.26549e-15	5.25352e-30	-0.689864	0.194	0.279	5.20151e-26	1.39423	Map4k4
131	6.81296e-20	-0.701834	0.183	0.238	6.74551e-16	1.22584e-28	-0.690816	0.154	0.238	1.2137e-24	1.39265	Ssr3
132	1.10211e-55	-0.702892	0.048	0.148	1.0912e-51	1.55459e-53	-0.686305	0.044	0.148	1.5392e-49	1.3892	Tfrc
133	0.0291104	-0.584283	0.284	0.251	1	1.87645e-35	-0.803334	0.155	0.251	1.85787e-31	1.38762	Tob1
134	0.0517082	-0.526718	0.22	0.206	1	2.39412e-50	-0.860363	0.089	0.206	2.37042e-46	1.38708	Klf4
135	4.05777e-17	-0.728832	0.462	0.416	4.0176e-13	2.03323e-18	-0.654732	0.429	0.416	2.0131e-14	1.38356	Foxp1
136	1.07027e-22	-0.667905	0.135	0.201	1.05967e-18	2.98926e-47	-0.714566	0.089	0.201	2.95967e-43	1.38247	Tatdn2
137	2.44035e-26	-0.613591	0.643	0.533	2.41619e-22	8.04557e-61	-0.760046	0.496	0.533	7.96592e-57	1.37364	Eif4a2
138	6.02804e-18	-0.720754	0.303	0.323	5.96836e-14	8.47323e-21	-0.650924	0.276	0.323	8.38935e-17	1.37168	Rsrc2
139	4.92295e-12	-0.642651	0.135	0.176	4.87421e-08	1.34445e-37	-0.720285	0.081	0.176	1.33114e-33	1.36294	Map2k3
140	2.61335e-213	-0.623762	0.958	0.914	2.58748e-209	1.04442e-257	-0.734711	0.923	0.914	1.03408e-253	1.35847	Rpl5
141	3.44862e-09	-0.685287	0.337	0.319	3.41448e-05	6.03501e-14	-0.666866	0.302	0.319	5.97526e-10	1.35215	Srsf6
142	1.42717e-24	-0.701162	0.148	0.217	1.41304e-20	8.75706e-25	-0.649507	0.141	0.217	8.67036e-21	1.35067	Rictor
143	8.7064e-14	-0.724774	0.302	0.312	8.62021e-10	5.76611e-11	-0.623883	0.302	0.312	5.70903e-07	1.34866	Matr3
144	2.77682e-08	-0.571737	0.602	0.47	0.000274933	6.22983e-35	-0.776396	0.469	0.47	6.16815e-31	1.34813	Ubald2
145	0.180066	-0.551153	0.33	0.273	1	1.10267e-34	-0.789497	0.18	0.273	1.09176e-30	1.34065	Chd7
146	1.12261e-52	-0.781807	0.09	0.201	1.11149e-48	7.01643e-11	-0.558245	0.161	0.201	6.94697e-07	1.34005	Ddx3y
147	2.167e-11	-0.628874	0.197	0.228	2.14554e-07	3.70698e-35	-0.70995	0.131	0.228	3.67028e-31	1.33882	Spty2d1
148	1.77625e-16	-0.658312	0.173	0.221	1.75867e-12	6.65296e-30	-0.679929	0.134	0.221	6.5871e-26	1.33824	Wdr43
149	2.38903e-12	-0.710008	0.284	0.296	2.36538e-08	5.8357e-10	-0.617253	0.284	0.296	5.77793e-06	1.32726	2810474O19Rik
150	0.0254976	-0.569512	0.363	0.303	1	3.45231e-27	-0.754729	0.235	0.303	3.41814e-23	1.32424	Wac
151	3.89312e-17	-0.662926	0.171	0.222	3.85458e-13	1.46408e-30	-0.659245	0.133	0.222	1.44958e-26	1.32217	Ivns1abp
152	2.48717e-11	-0.646487	0.2	0.229	2.46255e-07	8.07346e-24	-0.672201	0.156	0.229	7.99353e-20	1.31869	Sik1
153	5.09767e-11	-0.641915	0.195	0.225	5.04721e-07	1.22249e-25	-0.67577	0.147	0.225	1.21038e-21	1.31769	Hspa9
154	4.64039e-11	-0.634851	0.216	0.241	4.59445e-07	2.59435e-28	-0.68149	0.159	0.241	2.56867e-24	1.31634	Serinc1
155	1.04806e-06	-0.618762	0.226	0.234	0.0103769	5.27769e-23	-0.692457	0.163	0.234	5.22544e-19	1.31122	Riok1
156	1.99888e-26	-0.65312	0.115	0.189	1.97909e-22	7.53228e-37	-0.656126	0.092	0.189	7.45771e-33	1.30925	Azin1
157	7.68327e-14	-0.622783	0.134	0.18	7.6072e-10	3.36946e-37	-0.681922	0.085	0.18	3.33611e-33	1.30471	Amd1
158	5.84398e-11	-0.656742	0.212	0.239	5.78612e-07	4.69242e-18	-0.647747	0.18	0.239	4.64597e-14	1.30449	Ranbp2
159	8.73438e-09	-0.630118	0.382	0.346	8.64791e-05	4.65496e-21	-0.670639	0.312	0.346	4.60887e-17	1.30076	Sfpq
160	2.19084e-07	-0.669963	0.152	0.177	0.00216915	4.21879e-10	-0.630782	0.137	0.177	4.17703e-06	1.30075	Cish
161	0.107602	-0.52644	0.471	0.361	1	3.43397e-30	-0.774202	0.304	0.361	3.39997e-26	1.30064	Brd2
162	1.86932e-35	-0.613707	0.055	0.133	1.85082e-31	4.05849e-75	-0.685713	0.021	0.133	4.01831e-71	1.29942	Tgif2
163	2.50729e-24	-0.717063	0.452	0.431	2.48247e-20	3.99118e-19	-0.58151	0.445	0.431	3.95167e-15	1.29857	Luc7l2
164	4.31461e-28	-0.644714	0.078	0.15	4.27189e-24	1.00841e-40	-0.652819	0.057	0.15	9.98423e-37	1.29753	Impact
165	2.72768e-20	-0.70966	0.499	0.445	2.70068e-16	6.98697e-17	-0.587634	0.479	0.445	6.9178e-13	1.29729	Iqgap1
166	8.96567e-15	-0.640199	0.149	0.196	8.87691e-11	5.08815e-25	-0.652373	0.119	0.196	5.03777e-21	1.29257	Crebrf
167	3.6967e-10	-0.635414	0.213	0.236	3.6601e-06	8.57004e-21	-0.654185	0.17	0.236	8.48519e-17	1.2896	Jmjd1c
168	1.60788e-31	-0.63663	0.655	0.545	1.59197e-27	9.23839e-44	-0.651231	0.564	0.545	9.14693e-40	1.28786	Akap13
169	1.03608e-74	-0.777526	0.018	0.116	1.02582e-70	4.53266e-41	-0.506397	0.033	0.116	4.48779e-37	1.28392	Cxcl2
170	1.28274e-05	-0.616788	0.192	0.203	0.127004	3.51368e-17	-0.666828	0.145	0.203	3.47889e-13	1.28362	Rcc2
171	2.42511e-07	-0.699978	0.267	0.265	0.0024011	4.65817e-06	-0.580668	0.263	0.265	0.0461206	1.28065	Ugcg
172	0.00834224	-0.560849	0.257	0.236	1	1.66437e-32	-0.717271	0.144	0.236	1.64789e-28	1.27812	Tnip1
173	1.6423e-15	-0.65631	0.189	0.233	1.62604e-11	2.31038e-19	-0.62179	0.17	0.233	2.28751e-15	1.2781	Cnot1
174	1.09802e-11	-0.640028	0.161	0.199	1.08715e-07	4.49884e-18	-0.63796	0.137	0.199	4.4543e-14	1.27799	Kdm2a
175	2.06917e-06	-0.616446	0.312	0.295	0.0204868	1.24054e-17	-0.659606	0.25	0.295	1.22825e-13	1.27605	Sf3b3
176	2.07715e-08	-0.588904	0.492	0.409	0.000205659	6.07662e-26	-0.683562	0.39	0.409	6.01646e-22	1.27247	Eif5
177	0	-0.632325	0.995	0.992	0	0	-0.638504	0.989	0.992	0	1.27083	Rpl37a
178	8.19763e-10	-0.649869	0.431	0.376	8.11647e-06	8.12283e-15	-0.61749	0.383	0.376	8.04241e-11	1.26736	Grk2
179	2.59581e-07	-0.628205	0.396	0.346	0.00257011	5.47027e-16	-0.638112	0.333	0.346	5.41611e-12	1.26632	U2af1
180	0.603075	-0.498745	0.236	0.204	1	1.85208e-40	-0.763837	0.1	0.204	1.83375e-36	1.26258	Chka
181	3.13618e-10	-0.65109	0.248	0.264	3.10513e-06	2.43191e-13	-0.61034	0.227	0.264	2.40783e-09	1.26143	Mgea5
182	7.85594e-21	-0.59717	0.119	0.183	7.77817e-17	2.05558e-41	-0.661114	0.081	0.183	2.03523e-37	1.25828	Dhx38
183	2.68313e-18	-0.689415	0.147	0.203	2.65657e-14	1.34982e-09	-0.556549	0.167	0.203	1.33645e-05	1.24596	Slc20a1
184	1.99882e-27	-0.654757	0.109	0.184	1.97903e-23	3.33847e-23	-0.588086	0.111	0.184	3.30542e-19	1.24284	Pan3
185	8.30115e-05	-0.578268	0.246	0.24	0.821897	6.58584e-23	-0.661895	0.17	0.24	6.52064e-19	1.24016	Etf1
186	7.9941e-08	-0.566273	0.496	0.408	0.000791496	8.58365e-26	-0.667945	0.389	0.408	8.49867e-22	1.23422	Csnk1a1
187	8.91401e-15	-0.707474	0.273	0.294	8.82576e-11	1.77381e-05	-0.523096	0.307	0.294	0.175625	1.23057	Ddx6
188	4.94201e-07	-0.616852	0.159	0.182	0.00489309	1.98668e-15	-0.610435	0.126	0.182	1.96701e-11	1.22729	Dgat1
189	4.83219e-38	-0.542788	0.821	0.705	4.78436e-34	3.74282e-64	-0.681826	0.75	0.705	3.70577e-60	1.22461	Klf6
190	0.663398	-0.485126	0.421	0.312	1	1.08602e-26	-0.739061	0.247	0.312	1.07527e-22	1.22419	Ptp4a1
191	0.00222008	-0.579117	0.154	0.162	1	2.50779e-19	-0.642201	0.097	0.162	2.48296e-15	1.22132	Got1
192	8.25277e-09	-0.649614	0.269	0.274	8.17107e-05	4.5245e-09	-0.568402	0.257	0.274	4.47971e-05	1.21802	Nktr
193	1.08337e-05	-0.568712	0.173	0.187	0.107264	1.35621e-23	-0.644479	0.114	0.187	1.34278e-19	1.21319	Ppp1r16b
194	1.09363e-11	-0.631881	0.185	0.218	1.0828e-07	1.5911e-13	-0.58118	0.171	0.218	1.57535e-09	1.21306	Mob1a
195	6.81847e-14	-0.604075	0.136	0.182	6.75097e-10	4.74661e-24	-0.607033	0.108	0.182	4.69961e-20	1.21111	Ist1
196	1.63785e-38	-0.629736	0.042	0.119	1.62163e-34	1.23796e-30	-0.580228	0.046	0.119	1.22571e-26	1.20996	Irf4
197	0.000433314	-0.568798	0.244	0.235	1	3.5435e-21	-0.639867	0.167	0.235	3.50842e-17	1.20866	B4galt1
198	9.10849e-10	-0.65176	0.181	0.211	9.01831e-06	2.95682e-07	-0.554694	0.186	0.211	0.00292755	1.20645	Tab2
199	4.65901e-05	-0.580964	0.311	0.286	0.461289	5.45086e-15	-0.621086	0.25	0.286	5.3969e-11	1.20205	U2af2
200	3.65974e-23	-0.606995	0.091	0.157	3.6235e-19	2.61031e-28	-0.59284	0.078	0.157	2.58447e-24	1.19984	Cand1
201	1.71103e-180	-0.602843	0.954	0.877	1.69409e-176	3.78355e-163	-0.595123	0.919	0.877	3.74609e-159	1.19797	Ddx5
202	0.000211311	-0.605185	0.245	0.236	1	1.01314e-09	-0.592679	0.208	0.236	1.00311e-05	1.19786	Esyt2
203	1.80003e-13	-0.565577	0.123	0.169	1.78221e-09	3.26732e-36	-0.629818	0.077	0.169	3.23497e-32	1.1954	Ythdf1
204	0	-0.599956	0.994	0.985	0	0	-0.587792	0.981	0.985	0	1.18775	Rplp2
205	0.00155434	-0.381294	0.276	0.199	1	2.03317e-54	-0.796624	0.079	0.199	2.01304e-50	1.17792	Maff
206	7.55332e-13	-0.597148	0.145	0.187	7.47854e-09	4.6068e-16	-0.58008	0.131	0.187	4.5612e-12	1.17723	Usp19
207	7.55727e-05	-0.584618	0.202	0.207	0.748246	1.3798e-11	-0.588231	0.166	0.207	1.36614e-07	1.17285	Chtop
208	0.000654112	-0.386647	0.423	0.296	1	1.30087e-20	-0.785039	0.242	0.296	1.28799e-16	1.17169	Dusp10
209	1.94726e-08	-0.58501	0.206	0.225	0.000192798	2.1925e-15	-0.583345	0.174	0.225	2.1708e-11	1.16836	Sidt2
210	0.187499	-0.586488	0.287	0.243	1	3.61612e-05	-0.580583	0.242	0.243	0.358032	1.16707	4932438A13Rik
211	1.03874e-17	-0.573327	0.102	0.158	1.02845e-13	2.05769e-27	-0.59276	0.081	0.158	2.03732e-23	1.16609	Spag9
212	8.10911e-07	-0.603982	0.191	0.208	0.00802883	1.85504e-11	-0.558852	0.165	0.208	1.83668e-07	1.16283	Ankrd17
213	5.00637e-05	-0.623919	0.465	0.385	0.495681	8.34226e-08	-0.537673	0.413	0.385	0.000825967	1.16159	Sh2d2a
214	6.66782e-25	-0.580749	0.075	0.142	6.60181e-21	2.38461e-29	-0.579631	0.064	0.142	2.36101e-25	1.16038	Strn3
215	3.85614e-07	-0.587019	0.244	0.25	0.00381797	1.12894e-13	-0.571877	0.206	0.25	1.11776e-09	1.1589	Wdr26
216	0.000205733	-0.568971	0.28	0.261	1	1.00848e-13	-0.587467	0.222	0.261	9.98492e-10	1.15644	Dhx15
217	3.56592e-11	-0.557934	0.101	0.142	3.53062e-07	5.37409e-24	-0.596113	0.072	0.142	5.32089e-20	1.15405	Stat5a
218	7.84266e-11	-0.624956	0.095	0.135	7.76502e-07	2.01685e-09	-0.528985	0.094	0.135	1.99688e-05	1.15394	Maf
219	5.50198e-11	-0.646159	0.489	0.416	5.44751e-07	5.97772e-06	-0.504442	0.496	0.416	0.0591854	1.1506	Pik3cd
220	0.266258	-0.513011	0.438	0.337	1	5.02884e-15	-0.636919	0.318	0.337	4.97905e-11	1.14993	Tra2a
221	0.00134766	-0.55884	0.23	0.222	1	4.26263e-13	-0.586284	0.177	0.222	4.22043e-09	1.14512	Ago2
222	9.55382e-14	-0.588363	0.113	0.16	9.45924e-10	3.45002e-19	-0.556351	0.096	0.16	3.41587e-15	1.14471	Tnpo3
223	8.44691e-07	-0.557975	0.192	0.209	0.00836329	1.71311e-16	-0.583562	0.152	0.209	1.69615e-12	1.14154	Zfp91
224	3.37107e-95	-0.460378	0.951	0.835	3.33769e-91	3.37496e-177	-0.679848	0.879	0.835	3.34155e-173	1.14023	Rbm39
225	2.55156e-06	-0.594417	0.18	0.196	0.0252629	1.20963e-08	-0.544642	0.164	0.196	0.000119766	1.13906	Kdm7a
226	9.4046e-08	-0.551022	0.128	0.157	0.000931149	5.27385e-20	-0.587685	0.092	0.157	5.22164e-16	1.13871	Tulp4
227	2.57247e-233	-0.461988	0.998	0.986	2.54701e-229	0	-0.675321	0.995	0.986	0	1.13731	mt-Co3
228	3.55027e-09	-0.59246	0.567	0.451	3.51512e-05	9.37942e-15	-0.541238	0.5	0.451	9.28657e-11	1.1337	Hsp90b1
229	2.62807e-43	-0.649844	0.032	0.109	2.60206e-39	3.667e-14	-0.482248	0.06	0.109	3.63069e-10	1.13209	Rgs16
230	1.24355e-74	-0.56281	0.018	0.114	1.23124e-70	4.00406e-76	-0.569182	0.011	0.114	3.96442e-72	1.13199	Gm11361
231	4.49585e-09	-0.566551	0.143	0.175	4.45134e-05	4.02374e-15	-0.564844	0.12	0.175	3.98391e-11	1.1314	Fam133b
232	0.0324733	-0.523899	0.275	0.245	1	2.86487e-14	-0.605543	0.2	0.245	2.83651e-10	1.12944	Prpf38b
233	1.65093e-25	-0.581213	0.074	0.141	1.63459e-21	2.4733e-22	-0.548072	0.074	0.141	2.44882e-18	1.12929	Rbm34
234	0.03335	-0.560535	0.212	0.2	1	1.68251e-06	-0.568624	0.177	0.2	0.0166585	1.12916	Kcnn4
235	6.02065e-09	-0.575049	0.148	0.179	5.96104e-05	1.10129e-10	-0.552292	0.138	0.179	1.09039e-06	1.12734	Med13l
236	0.00993342	-0.498723	0.52	0.395	1	1.30798e-20	-0.627983	0.386	0.395	1.29503e-16	1.12671	Sf1
237	1.40313e-06	-0.568128	0.136	0.161	0.0138923	6.21851e-11	-0.556558	0.117	0.161	6.15695e-07	1.12469	Atad2
238	0.00408004	-0.476799	0.162	0.167	1	9.71927e-37	-0.647623	0.075	0.167	9.62305e-33	1.12442	Ddit3
239	0.433583	-0.531344	0.548	0.371	1	8.60289e-06	-0.591558	0.434	0.371	0.0851772	1.1229	Psap
240	3.67582e-07	-0.596793	0.239	0.246	0.00363943	3.86834e-07	-0.525883	0.232	0.246	0.00383004	1.12268	Dhx9
241	0.083291	-0.524454	0.176	0.168	1	3.73639e-13	-0.597817	0.118	0.168	3.6994e-09	1.12227	Rnf19a
242	2.37307e-17	-0.552686	0.079	0.132	2.34957e-13	9.48986e-26	-0.565188	0.062	0.132	9.39591e-22	1.11787	Aff1
243	0.000756426	-0.566113	0.245	0.234	1	3.83956e-08	-0.548536	0.211	0.234	0.000380155	1.11465	Ccnl2
244	3.07372e-17	-0.534885	0.076	0.129	3.04329e-13	4.70501e-34	-0.578288	0.049	0.129	4.65843e-30	1.11317	Tollip
245	0.00439279	-0.372177	0.442	0.309	1	1.42937e-27	-0.738375	0.236	0.309	1.41522e-23	1.11055	Irf1
246	1.32726e-09	-0.562416	0.126	0.162	1.31412e-05	3.53733e-13	-0.54731	0.112	0.162	3.50231e-09	1.10973	Mkln1
247	0.250909	-0.380924	0.567	0.397	1	3.46656e-28	-0.728176	0.36	0.397	3.43224e-24	1.1091	Gna13
248	2.38093e-15	-0.520726	0.086	0.136	2.35736e-11	3.66626e-37	-0.583304	0.051	0.136	3.62996e-33	1.10403	Baiap2
249	9.85241e-07	-0.587172	0.145	0.168	0.00975487	7.56317e-07	-0.513146	0.14	0.168	0.00748829	1.10032	Trp53inp1
250	2.51604e-84	-0.400527	0.946	0.83	2.49113e-80	7.90326e-201	-0.69739	0.852	0.83	7.82502e-197	1.09792	Pabpc1
251	4.37434e-06	-0.530448	0.135	0.157	0.0433103	4.33851e-16	-0.565014	0.101	0.157	4.29556e-12	1.09546	Zfp281
252	3.58157e-09	-0.589199	0.134	0.167	3.54611e-05	4.00352e-08	-0.50363	0.133	0.167	0.000396388	1.09283	Uhrf2
253	0.131565	-0.376392	0.133	0.132	1	5.49155e-122	-0.712812	0	0.132	5.43718e-118	1.0892	H2-Q2
254	0.120628	-0.564039	0.303	0.255	1	0.00757335	-0.524791	0.281	0.255	1	1.08883	Epb41l4aos
255	4.16174e-05	-0.623531	0.379	0.33	0.412054	0.00288605	-0.459772	0.376	0.33	1	1.0833	Ptpn22
256	1.31619e-31	-0.606958	0.074	0.151	1.30316e-27	1.7242e-10	-0.475691	0.109	0.151	1.70713e-06	1.08265	Rpl27-ps3
257	0.874174	-0.470521	0.334	0.262	1	1.35129e-14	-0.612043	0.22	0.262	1.33791e-10	1.08256	Sun2
258	2.79735e-06	-0.601608	0.422	0.36	0.0276966	0.000111895	-0.479912	0.413	0.36	1	1.08152	Celf2
259	0.122834	-0.557112	0.377	0.307	1	0.00243947	-0.523862	0.342	0.307	1	1.08097	Tagap
260	2.39682e-24	-0.766256	0.262	0.31	2.3731e-20	0.849511	-0.314708	0.388	0.31	1	1.08096	Serinc3
261	0.00241079	-0.543773	0.221	0.213	1	3.1334e-08	-0.536856	0.187	0.213	0.000310238	1.08063	Clk4
262	6.03302e-12	-0.551442	0.124	0.166	5.97329e-08	1.53826e-15	-0.52802	0.11	0.166	1.52303e-11	1.07946	Cdk9
263	2.19901e-20	-0.51998	0.059	0.116	2.17724e-16	2.66028e-36	-0.556092	0.038	0.116	2.63394e-32	1.07607	Nampt
264	0.000602661	-0.530178	0.187	0.191	1	4.30353e-11	-0.545186	0.15	0.191	4.26093e-07	1.07536	Bud31
265	4.42947e-08	-0.576154	0.152	0.181	0.000438562	1.74741e-07	-0.496658	0.15	0.181	0.00173011	1.07281	Celf1
266	3.41763e-30	-0.354946	0.889	0.73	3.38379e-26	7.01612e-122	-0.717573	0.756	0.73	6.94666e-118	1.07252	Ubc
267	0.00465466	-0.538704	0.214	0.206	1	7.7293e-08	-0.533764	0.18	0.206	0.000765278	1.07247	Alkbh1
268	5.64823e-05	-0.515966	0.13	0.147	0.559231	1.4535e-16	-0.555563	0.091	0.147	1.43911e-12	1.07153	Pde4d
269	0.0062986	-0.560992	0.315	0.279	1	8.72207e-06	-0.510332	0.279	0.279	0.0863572	1.07132	Ccdc88c
270	2.95227e-07	-0.673228	0.391	0.354	0.00292304	0.281415	-0.396967	0.425	0.354	1	1.0702	Trbc1
271	0.000114056	-0.521503	0.139	0.155	1	3.68912e-13	-0.548581	0.106	0.155	3.6526e-09	1.07008	Zeb1
272	1.20773e-39	-0.557733	0.777	0.626	1.19577e-35	1.19401e-35	-0.511308	0.731	0.626	1.18219e-31	1.06904	Ets1
273	8.28352e-60	-0.517475	0.894	0.735	8.20151e-56	1.39887e-75	-0.550514	0.808	0.735	1.38502e-71	1.06799	Laptm5
274	0.0627761	-0.5022	0.261	0.233	1	5.38201e-17	-0.564188	0.174	0.233	5.32873e-13	1.06639	Sec61a1
275	1.00561e-43	-0.53411	0.039	0.12	9.95652e-40	2.50481e-42	-0.531297	0.035	0.12	2.48002e-38	1.06541	Gm2000
276	0.000308298	-0.462729	0.089	0.109	1	3.04996e-34	-0.602657	0.035	0.109	3.01976e-30	1.06539	Cdkn1a
277	0.0698842	-0.439223	0.348	0.255	1	1.25828e-15	-0.626075	0.208	0.255	1.24582e-11	1.0653	Zdhhc18
278	4.9968e-220	-0.644018	0.94	0.875	4.94733e-216	4.19126e-97	-0.42124	0.937	0.875	4.14977e-93	1.06526	Rpl9
279	6.11938e-28	-0.526899	0.045	0.109	6.0588e-24	1.83158e-35	-0.537239	0.034	0.109	1.81345e-31	1.06414	Zbtb10
280	2.11653e-05	-0.52288	0.138	0.156	0.209558	1.49505e-15	-0.541125	0.102	0.156	1.48025e-11	1.06401	Ing3
281	0.575464	-0.527882	0.271	0.226	1	0.000161444	-0.53537	0.224	0.226	1	1.06325	Hipk1
282	3.85616e-08	-0.555782	0.139	0.169	0.000381799	1.17549e-07	-0.505527	0.137	0.169	0.00116386	1.06131	Sfswap
283	2.98178e-05	-0.533163	0.551	0.447	0.295226	3.8336e-09	-0.526482	0.5	0.447	3.79565e-05	1.05964	Emb
284	2.88857e-12	-0.69037	0.182	0.225	2.85997e-08	0.913637	-0.368257	0.255	0.225	1	1.05863	Ctla4
285	8.4032e-06	-0.508538	0.149	0.169	0.0832001	3.94882e-18	-0.549582	0.107	0.169	3.90973e-14	1.05812	Poldip3
286	0.0280955	-0.520041	0.25	0.228	1	6.87781e-08	-0.53788	0.205	0.228	0.000680972	1.05792	2020-03-07
287	0.0229232	-0.435219	0.544	0.442	1	2.86023e-20	-0.620739	0.425	0.442	2.83192e-16	1.05596	Il2rb
288	0.0223175	-0.502852	0.187	0.181	1	8.24084e-10	-0.548939	0.143	0.181	8.15926e-06	1.05179	Alyref
289	3.1663e-17	-0.505949	0.06	0.11	3.13495e-13	8.62527e-37	-0.541974	0.034	0.11	8.53988e-33	1.04792	Mex3c
290	0.834009	-0.467184	0.176	0.156	1	6.14993e-15	-0.580549	0.102	0.156	6.08905e-11	1.04773	Plk3
291	3.41321e-05	-0.515668	0.145	0.163	0.337942	8.59643e-16	-0.531897	0.106	0.163	8.51133e-12	1.04757	Atp6v1h
292	8.87873e-22	-0.504157	0.753	0.577	8.79083e-18	9.62403e-31	-0.540723	0.673	0.577	9.52876e-27	1.04488	Slc25a3
293	0.000500985	-0.571395	0.264	0.248	1	0.00110904	-0.47274	0.258	0.248	1	1.04413	Zcchc11
294	0.293983	-0.502051	0.348	0.281	1	3.32454e-11	-0.541333	0.256	0.281	3.29162e-07	1.04338	Ppp2r5a
295	0.76682	-0.458958	0.257	0.21	1	1.37649e-14	-0.584149	0.158	0.21	1.36286e-10	1.04311	Trim28
296	0.000501119	-0.51279	0.203	0.205	1	3.18724e-13	-0.529277	0.156	0.205	3.15569e-09	1.04207	Cltc
297	0.000669413	-0.382567	0.709	0.519	1	5.55209e-36	-0.659334	0.544	0.519	5.49712e-32	1.0419	Fam107b
298	2.05031e-08	-0.571804	0.175	0.2	0.000203001	6.9808e-06	-0.468269	0.181	0.2	0.0691169	1.04007	Spata13
299	0.00305238	-0.555633	0.226	0.217	1	0.000255818	-0.48434	0.211	0.217	1	1.03997	Prpf4b
300	6.38629e-13	-0.493537	0.079	0.123	6.32306e-09	4.61331e-30	-0.542361	0.049	0.123	4.56764e-26	1.0359	Rassf3
301	4.95113e-13	-0.530926	0.086	0.131	4.90211e-09	2.70811e-17	-0.504272	0.074	0.131	2.6813e-13	1.0352	Ets2
302	9.51465e-05	-0.526619	0.168	0.179	0.942046	1.80127e-08	-0.507594	0.146	0.179	0.000178343	1.03421	Larp1
303	0.00117916	-0.606402	0.255	0.248	1	0.0157333	-0.424092	0.256	0.248	1	1.03049	Nr4a2
304	0.000345307	-0.571286	0.334	0.294	1	0.025547	-0.456321	0.342	0.294	1	1.02761	Nap1l1
305	0.000423572	-0.386553	0.381	0.261	1	5.09263e-12	-0.638616	0.232	0.261	5.04221e-08	1.02517	Foxo1
306	3.11721e-06	-0.520228	0.134	0.157	0.0308635	1.41631e-10	-0.504513	0.115	0.157	1.40229e-06	1.02474	2900097C17Rik
307	9.93904e-07	-0.491667	0.114	0.141	0.00984064	5.091e-17	-0.529749	0.083	0.141	5.0406e-13	1.02142	Mapkapk2
308	3.82433e-11	-0.490287	0.089	0.129	3.78646e-07	8.74043e-31	-0.530206	0.053	0.129	8.6539e-27	1.02049	1700017B05Rik
309	0.443496	-0.492792	0.349	0.265	1	0.00120743	-0.526367	0.283	0.265	1	1.01916	G3bp1
310	7.79076e-08	-0.468394	0.111	0.142	0.000771363	2.04818e-30	-0.550752	0.063	0.142	2.0279e-26	1.01915	Gnl1
311	3.92733e-20	-0.488962	0.055	0.109	3.88845e-16	7.83493e-39	-0.529335	0.032	0.109	7.75737e-35	1.0183	Spata2
312	0.0252399	-0.519112	0.167	0.164	1	3.52425e-07	-0.498832	0.134	0.164	0.00348936	1.01794	Zmynd8
313	0.213282	-0.529769	0.391	0.31	1	0.00808498	-0.487901	0.356	0.31	1	1.01767	4930523C07Rik
314	0.898268	-0.483126	0.301	0.244	1	6.04111e-07	-0.532749	0.23	0.244	0.0059813	1.01588	Stat3
315	0.13674	-0.477193	0.418	0.329	1	2.44895e-10	-0.538645	0.329	0.329	2.4247e-06	1.01584	Cdk11b
316	0.0190184	-0.469749	0.616	0.436	1	4.53026e-12	-0.545826	0.507	0.436	4.48541e-08	1.01557	Tomm20
317	1.02831e-15	-0.52142	0.079	0.13	1.01813e-11	8.16013e-18	-0.492903	0.072	0.13	8.07935e-14	1.01432	Zranb1
318	2.08429e-06	-0.545656	0.182	0.199	0.0206365	1.88158e-06	-0.465664	0.175	0.199	0.0186295	1.01132	Kdm5a
319	0.0236458	-0.39835	0.204	0.156	1	2.18583e-17	-0.611441	0.097	0.156	2.16419e-13	1.00979	Etv3
320	1.42983e-08	-0.527462	0.125	0.157	0.000141568	4.22297e-09	-0.482251	0.119	0.157	4.18116e-05	1.00971	Arcn1
321	0.0172419	-0.486145	0.151	0.152	1	3.32874e-08	-0.522339	0.119	0.152	0.000329578	1.00848	Dyrk2
322	2.11132e-09	-0.543107	0.112	0.147	2.09042e-05	5.90659e-06	-0.465177	0.122	0.147	0.0584812	1.00828	Gramd4
323	0.000202722	-0.412992	0.381	0.257	1	3.14347e-10	-0.592907	0.232	0.257	3.11235e-06	1.0059	Vgll4
324	0.00390885	-0.516014	0.184	0.184	1	1.11309e-07	-0.488001	0.153	0.184	0.00110207	1.00402	Nufip2
325	0.516006	-0.430682	0.19	0.171	1	2.09581e-19	-0.57001	0.106	0.171	2.07506e-15	1.00069	Ogfr
326	2.20456e-06	-0.522399	0.153	0.175	0.0218274	1.67717e-07	-0.477192	0.144	0.175	0.00166057	0.999592	Elk4
327	3.13154e-11	-0.509894	0.09	0.13	3.10054e-07	5.01742e-12	-0.489198	0.085	0.13	4.96775e-08	0.999092	Map2k7
328	0.777505	-0.472256	0.297	0.236	1	6.12111e-06	-0.525945	0.228	0.236	0.0606052	0.9982	Ssh2
329	0.00251618	-0.458515	0.139	0.149	1	8.43152e-18	-0.539654	0.089	0.149	8.34805e-14	0.998169	Fbrsl1
330	0.712898	-0.494445	0.221	0.191	1	0.000122199	-0.502918	0.177	0.191	1	0.997363	P2ry10
331	0.00105032	-0.502741	0.152	0.162	1	1.9271e-07	-0.494351	0.13	0.162	0.00190802	0.997092	Noc2l
332	0.683003	-0.470277	0.223	0.192	1	6.20709e-09	-0.526806	0.158	0.192	6.14564e-05	0.997083	Rbm33
333	0.00122374	-0.491953	0.137	0.149	1	4.45861e-11	-0.505031	0.104	0.149	4.41447e-07	0.996984	Lmnb1
334	0.0124377	-0.474452	0.146	0.15	1	2.84584e-13	-0.52236	0.1	0.15	2.81767e-09	0.996812	Arih2
335	0.618344	-0.465494	0.174	0.156	1	1.13154e-09	-0.52906	0.117	0.156	1.12034e-05	0.994554	Nup50
336	0.00305594	-0.528595	0.472	0.37	1	0.000319149	-0.463594	0.439	0.37	1	0.99219	Eif2s2
337	0.912995	-0.47877	0.344	0.273	1	0.000670744	-0.513329	0.29	0.273	1	0.992099	Tacc1
338	0.00933845	-0.519882	0.209	0.201	1	4.23722e-05	-0.47194	0.186	0.201	0.419527	0.991822	Il17ra
339	0.00156212	-0.503302	0.128	0.139	1	5.4147e-06	-0.48659	0.113	0.139	0.0536109	0.989892	Zbtb20
340	1.92585e-39	-0.640118	0.046	0.125	1.90679e-35	0.30292	-0.346291	0.127	0.125	1	0.986408	Lyz2
341	0.000592593	-0.490775	0.15	0.161	1	1.6651e-10	-0.495152	0.119	0.161	1.64861e-06	0.985927	Xbp1
342	0.00461573	-0.520596	0.184	0.184	1	0.000426149	-0.463482	0.172	0.184	1	0.984079	Gatad2b
343	1.09581e-05	-0.521843	0.141	0.161	0.108496	1.75288e-05	-0.460626	0.138	0.161	0.173553	0.982469	Heca
344	0.00275871	-0.389328	0.307	0.219	1	2.12474e-13	-0.59267	0.173	0.219	2.10371e-09	0.981998	Ubn1
345	6.43253e-06	-0.477216	0.114	0.138	0.0636885	6.73568e-15	-0.502962	0.085	0.138	6.66899e-11	0.980178	Smg5
346	7.48692e-25	-0.517632	0.05	0.111	7.4128e-21	1.36732e-18	-0.460698	0.055	0.111	1.35379e-14	0.97833	Mir142hg
347	0.0761155	-0.522806	0.396	0.318	1	0.028605	-0.452951	0.376	0.318	1	0.975757	Ddx39b
348	1.14771e-06	-0.543415	0.511	0.421	0.0113635	0.00258108	-0.428425	0.522	0.421	1	0.97184	Atp1b3
349	1.629e-21	-0.493806	0.048	0.103	1.61287e-17	7.64485e-27	-0.477097	0.039	0.103	7.56917e-23	0.970903	Sirt1
350	7.40107e-79	-0.394535	0.954	0.845	7.3278e-75	6.55539e-146	-0.575345	0.893	0.845	6.4905e-142	0.96988	Rps15
351	0.86962	-0.497118	0.293	0.235	1	0.00326656	-0.470712	0.243	0.235	1	0.96783	Chd2
352	0.294592	-0.478166	0.284	0.222	1	0.00572843	-0.487949	0.229	0.222	1	0.966115	Fip1l1
353	2.06464e-07	-0.483042	0.098	0.128	0.0020442	2.2153e-15	-0.482653	0.075	0.128	2.19336e-11	0.965696	Man2a2
354	5.44706e-07	-0.250553	0.194	0.128	0.00539314	3.7161e-119	-0.714871	0	0.128	3.67931e-115	0.965425	H2-Q1
355	0.017447	-0.391685	0.282	0.21	1	5.3171e-12	-0.573642	0.167	0.21	5.26446e-08	0.965328	Stt3b
356	9.19905e-127	-0.376257	0.993	0.986	9.10798e-123	3.09513e-256	-0.588938	0.975	0.986	3.06449e-252	0.965195	Rps28
357	1.94342e-10	-0.482549	0.073	0.11	1.92418e-06	1.7384e-13	-0.482246	0.064	0.11	1.72119e-09	0.964795	Cep120
358	0.0801622	-0.509902	0.234	0.212	1	0.0176359	-0.452985	0.221	0.212	1	0.962888	Zcchc6
359	4.98102e-19	-0.579814	0.647	0.531	4.9317e-15	6.62911e-12	-0.381611	0.617	0.531	6.56348e-08	0.961425	Ifngr1
360	3.57073e-05	-0.673698	0.177	0.123	0.353538	3.44661e-26	-0.287405	0.252	0.123	3.41249e-22	0.961103	Hist1h2ap
361	0.000421555	-0.36661	0.117	0.136	1	1.21336e-30	-0.592888	0.057	0.136	1.20134e-26	0.959498	Atf3
362	7.96801e-07	-0.47051	0.095	0.123	0.00788913	3.34736e-15	-0.487888	0.071	0.123	3.31422e-11	0.958398	Fem1c
363	0.164393	-0.49557	0.304	0.255	1	0.0126244	-0.460514	0.281	0.255	1	0.956084	Ywhae
364	1.35971e-27	-0.508341	0.052	0.117	1.34625e-23	1.64941e-15	-0.445725	0.066	0.117	1.63308e-11	0.954067	Gm10036
365	0.00862169	-0.472614	0.165	0.167	1	1.64536e-10	-0.479197	0.124	0.167	1.62907e-06	0.951811	Ppp1r15b
366	1.50253e-06	-0.530282	0.155	0.177	0.0148765	0.0030855	-0.419173	0.17	0.177	1	0.949455	Pds5a
367	0.0266303	-0.469796	0.16	0.159	1	4.86591e-07	-0.478025	0.129	0.159	0.00481773	0.947822	Rnf220
368	1.043e-07	-0.478312	0.109	0.139	0.00103268	2.07235e-12	-0.468858	0.092	0.139	2.05183e-08	0.94717	Rpf1
369	0.00029717	-0.469792	0.126	0.142	1	1.10214e-09	-0.475258	0.102	0.142	1.09123e-05	0.94505	Paf1
370	0.451985	-0.427461	0.197	0.163	1	1.16435e-10	-0.516069	0.121	0.163	1.15282e-06	0.943529	Arih1
371	0.774053	-0.44498	0.234	0.194	1	1.99375e-06	-0.498478	0.171	0.194	0.0197401	0.943458	Tnks2
372	2.44979e-21	-0.513763	0.066	0.125	2.42554e-17	1.37922e-11	-0.428859	0.08	0.125	1.36557e-07	0.942623	Atp8b2
373	5.15329e-07	-0.465057	0.082	0.11	0.00510227	2.70902e-17	-0.475563	0.057	0.11	2.6822e-13	0.940621	Tsc22d2
374	3.11041e-06	-0.440299	0.08	0.105	0.0307962	7.24381e-26	-0.499133	0.042	0.105	7.1721e-22	0.939433	Jmy
375	0.175696	-0.489094	0.277	0.238	1	0.00335224	-0.446169	0.249	0.238	1	0.935262	Nup210
376	0.000830491	-0.399157	0.331	0.233	1	2.68419e-05	-0.535925	0.225	0.233	0.265762	0.935082	Ubl3
377	5.643e-08	-0.683147	0.207	0.234	0.000558713	7.17264e-07	-0.25147	0.329	0.234	0.00710163	0.934617	S100a4
378	2.8003e-06	-0.472879	0.099	0.125	0.0277258	6.02055e-10	-0.460872	0.085	0.125	5.96094e-06	0.933751	Ccnt2
379	0.00310235	-0.355808	0.208	0.153	1	7.19775e-19	-0.573308	0.091	0.153	7.12649e-15	0.929116	Sipa1l1
380	0.291088	-0.449168	0.241	0.193	1	0.000322591	-0.478993	0.181	0.193	1	0.928161	Nr3c1
381	0.321299	-0.474285	0.227	0.201	1	0.00023028	-0.453617	0.19	0.201	1	0.927901	Suco
382	0.150966	-0.475671	0.188	0.175	1	0.0127243	-0.450838	0.173	0.175	1	0.926509	Gpbp1
383	7.08646e-09	-0.413401	0.757	0.577	7.0163e-05	4.10749e-26	-0.511972	0.636	0.577	4.06682e-22	0.925373	Vps37b
384	0.00680829	-0.498617	0.191	0.189	1	0.0150753	-0.426367	0.189	0.189	1	0.924984	Arglu1
385	1.7218e-07	-0.572634	0.145	0.171	0.00170475	0.873338	-0.352252	0.196	0.171	1	0.924886	Ogt
386	0.0365522	-0.382826	0.234	0.178	1	8.3725e-12	-0.538819	0.133	0.178	8.28961e-08	0.921645	Crybg1
387	0.0843105	-0.466104	0.184	0.175	1	6.92596e-05	-0.455131	0.157	0.175	0.685739	0.921235	Pum1
388	0.150418	-0.426327	0.302	0.229	1	0.000221535	-0.493958	0.229	0.229	1	0.920285	Usf2
389	2.40391e-07	-0.560247	0.495	0.429	0.00238011	0.00263394	-0.357731	0.488	0.429	1	0.917978	Ahnak
390	3.45465e-09	-0.490788	0.091	0.126	3.42045e-05	6.17545e-07	-0.427101	0.095	0.126	0.00611431	0.917889	Trpm7
391	0.00160222	-0.448979	0.122	0.134	1	2.23622e-09	-0.466172	0.096	0.134	2.21409e-05	0.915151	Casc3
392	0.769499	-0.479845	0.208	0.18	1	0.0665599	-0.43359	0.187	0.18	1	0.913436	Hdac7
393	6.02687e-14	-0.43737	0.058	0.102	5.9672e-10	8.07531e-27	-0.474962	0.038	0.102	7.99536e-23	0.912332	Klf11
394	0.0215398	-0.416254	0.109	0.117	1	5.59363e-14	-0.495601	0.069	0.117	5.53825e-10	0.911855	Pgm2l1
395	0.0311847	-0.425742	0.134	0.137	1	1.95753e-11	-0.48537	0.093	0.137	1.93815e-07	0.911112	Cdt1
396	1.5198e-18	-0.521511	0.056	0.108	1.50475e-14	1.95928e-05	-0.388986	0.083	0.108	0.193989	0.910498	Lpin1
397	0.000792495	-0.453435	0.14	0.152	1	2.01719e-08	-0.45551	0.116	0.152	0.000199722	0.908945	Zfp207
398	0.0107953	-0.491393	0.182	0.18	1	0.0720851	-0.417391	0.186	0.18	1	0.908784	Tnrc6a
399	0.00398377	-0.456057	0.111	0.123	1	1.97235e-05	-0.452041	0.098	0.123	0.195282	0.908098	Prps1
400	0.00121751	-0.37024	0.482	0.326	1	2.80948e-05	-0.537534	0.357	0.326	0.278167	0.907774	Rsrp1
401	0.433369	-0.439752	0.216	0.177	1	0.000683474	-0.466823	0.166	0.177	1	0.906574	Ubr2
402	0.00446002	-0.425664	0.108	0.121	1	1.50033e-12	-0.479277	0.074	0.121	1.48547e-08	0.904941	Pmaip1
403	0.12616	-0.451463	0.181	0.171	1	3.52238e-08	-0.453302	0.136	0.171	0.000348751	0.904766	Zc3h13
404	2.09835e-08	-0.46463	0.098	0.131	0.000207758	4.19984e-10	-0.439347	0.09	0.131	4.15826e-06	0.903977	Khsrp
405	0.109615	-0.436305	0.33	0.248	1	0.0341704	-0.466078	0.272	0.248	1	0.902383	Mapre1
406	0.125796	-0.474967	0.204	0.187	1	0.0345879	-0.427288	0.193	0.187	1	0.902255	Nucks1
407	2.32674e-10	-0.48229	0.096	0.135	2.30371e-06	2.45162e-07	-0.417792	0.102	0.135	0.00242734	0.900082	Ppp6r3
408	1.08863e-05	-0.46563	0.104	0.128	0.107785	1.15411e-05	-0.433841	0.102	0.128	0.114268	0.899471	Chkb
409	4.04432e-06	-0.448511	0.106	0.13	0.0400428	5.12905e-12	-0.44963	0.085	0.13	5.07827e-08	0.898142	Bsdc1
410	1.11983e-37	-0.455781	0.858	0.676	1.10874e-33	7.28796e-36	-0.442149	0.808	0.676	7.21581e-32	0.89793	Rps17
411	0.2005	-0.467113	0.184	0.17	1	0.000366394	-0.429802	0.155	0.17	1	0.896915	Ube2h
412	0.00427713	-0.478094	0.134	0.143	1	0.00165398	-0.418374	0.128	0.143	1	0.896468	Rpa2
413	0.000372029	-0.374155	0.247	0.175	1	6.7655e-07	-0.521843	0.147	0.175	0.00669852	0.895998	Pag1
414	5.9515e-28	-0.542671	0.725	0.584	5.89258e-24	7.99175e-15	-0.353102	0.708	0.584	7.91263e-11	0.895773	Mbnl1
415	0.182773	-0.436417	0.255	0.199	1	0.00132785	-0.459	0.194	0.199	1	0.895417	Kansl1
416	0.17129	-0.45094	0.178	0.167	1	0.0065891	-0.444118	0.161	0.167	1	0.895058	Safb
417	0.913511	-0.420386	0.193	0.168	1	1.06889e-07	-0.474357	0.135	0.168	0.00105831	0.894744	Mapk1ip1l
418	0.00613802	-0.438146	0.126	0.135	1	3.8925e-08	-0.456342	0.101	0.135	0.000385396	0.894488	Brix1
419	0.138416	-0.441527	0.294	0.224	1	0.00716249	-0.452544	0.232	0.224	1	0.894071	Gnb1
420	0.375467	-0.493019	0.262	0.224	1	0.659825	-0.400918	0.261	0.224	1	0.893937	Capza2
421	0.387956	-0.420708	0.259	0.207	1	3.59491e-05	-0.472637	0.193	0.207	0.355932	0.893345	Ccnt1
422	0.0219293	-0.431493	0.538	0.371	1	0.0166582	-0.461367	0.437	0.371	1	0.89286	Zfp36l1
423	3.53099e-13	-0.52514	0.074	0.118	3.49603e-09	0.00138431	-0.367195	0.1	0.118	1	0.892335	Cdk6
424	1.30124e-13	-0.377232	0.816	0.615	1.28835e-09	4.07884e-36	-0.514715	0.705	0.615	4.03846e-32	0.891947	Srrm2
425	0.015203	-0.39931	0.251	0.19	1	1.34069e-05	-0.48948	0.168	0.19	0.132742	0.88879	Aplp2
426	0.0464726	-0.462833	0.595	0.437	1	0.00268838	-0.424799	0.547	0.437	1	0.887632	Calm2
427	5.90244e-07	-0.457111	0.089	0.117	0.005844	1.25634e-10	-0.430356	0.076	0.117	1.2439e-06	0.887466	N4bp1
428	0.00508957	-0.434314	0.347	0.247	1	0.454429	-0.452818	0.29	0.247	1	0.887131	Khdrbs1
429	0.992099	-0.462738	0.316	0.254	1	0.0585321	-0.424177	0.282	0.254	1	0.886915	Bclaf1
430	0.00211035	-0.425196	0.105	0.119	1	2.41186e-14	-0.460964	0.069	0.119	2.38798e-10	0.88616	Ap2a2
431	1.03553e-239	-0.368254	0.996	0.99	1.02528e-235	0	-0.516541	0.984	0.99	0	0.884795	Rpl38
432	0.000205384	-0.419888	0.093	0.112	1	1.42085e-16	-0.464516	0.06	0.112	1.40678e-12	0.884404	Polr1c
433	0.694667	-0.458809	0.232	0.2	1	0.0756456	-0.425184	0.211	0.2	1	0.883993	Ppp2r5c
434	0.445889	-0.44988	0.175	0.159	1	0.00142603	-0.434078	0.147	0.159	1	0.883957	Rnf4
435	0.0250573	-0.405146	0.41	0.29	1	0.000690928	-0.473474	0.314	0.29	1	0.87862	Arid1a
436	0.114666	-0.441944	0.613	0.436	1	6.52449e-05	-0.436555	0.54	0.436	0.64599	0.878499	Sf3b1
437	0.414666	-0.478633	0.474	0.337	1	0.554856	-0.398123	0.455	0.337	1	0.876756	Ube2b
438	0.0129238	-0.404505	0.286	0.211	1	0.00302151	-0.471581	0.213	0.211	1	0.876085	Mat2a
439	0.0184389	-0.449102	0.128	0.133	1	0.000948274	-0.425403	0.118	0.133	1	0.874505	Klf7
440	0.183878	-0.414815	0.136	0.133	1	2.61622e-10	-0.45874	0.091	0.133	2.59032e-06	0.873555	Msl2
441	0.0472538	-0.45314	0.163	0.16	1	0.000690478	-0.420353	0.145	0.16	1	0.873493	Dnttip2
442	0.0267901	-0.44214	0.654	0.457	1	1.20919e-05	-0.431098	0.58	0.457	0.119722	0.873238	Atp5a1
443	0.0737076	-0.37057	0.198	0.154	1	3.64204e-08	-0.50266	0.122	0.154	0.000360599	0.873231	Sh3bp5
444	0.000422884	-0.368199	0.249	0.177	1	4.86887e-05	-0.504478	0.16	0.177	0.482067	0.872677	Tuba4a
445	1.12958e-05	-0.315712	0.585	0.395	0.11184	2.59266e-09	-0.556795	0.406	0.395	2.56699e-05	0.872507	Fosb
446	0.0274155	-0.43947	0.141	0.144	1	0.000140038	-0.432715	0.124	0.144	1	0.872186	Uhmk1
447	0.681397	-0.481099	0.409	0.314	1	0.267627	-0.390782	0.38	0.314	1	0.871881	Rbm25
448	0.319016	-0.442443	0.335	0.256	1	0.121652	-0.429322	0.291	0.256	1	0.871765	Hnrnpm
449	1.12614e-05	-0.443234	0.095	0.119	0.111499	1.10664e-08	-0.428428	0.083	0.119	0.000109568	0.871663	Trim25
450	2.07646e-05	-0.418411	0.089	0.113	0.20559	1.49559e-17	-0.452081	0.058	0.113	1.48078e-13	0.870492	Pom121
451	0.00243833	-0.441994	0.112	0.125	1	2.09639e-05	-0.426088	0.1	0.125	0.207564	0.868082	Emsy
452	0.0340904	-0.484784	0.202	0.191	1	0.108464	-0.382717	0.202	0.191	1	0.867501	Cnot6l
453	4.3181e-11	-0.513719	0.091	0.132	4.27535e-07	0.136245	-0.35245	0.13	0.132	1	0.866169	Rbpj
454	0.751362	-0.442372	0.445	0.335	1	0.00771484	-0.423108	0.392	0.335	1	0.86548	Ptbp3
455	5.40484e-14	-0.427082	0.058	0.102	5.35133e-10	6.39109e-23	-0.437519	0.042	0.102	6.32782e-19	0.864601	Fnip1
456	0.488855	-0.461316	0.376	0.281	1	0.367124	-0.401043	0.339	0.281	1	0.862359	Ewsr1
457	0.0101537	-0.431873	0.119	0.128	1	1.24702e-05	-0.429602	0.102	0.128	0.123468	0.861475	Jarid2
458	0.00145352	-0.398072	0.298	0.21	1	0.00139343	-0.461201	0.209	0.21	1	0.859273	Coq10b
459	2.80033e-11	-0.419877	0.068	0.107	2.7726e-07	2.02752e-23	-0.438175	0.045	0.107	2.00745e-19	0.858052	Fam91a1
460	0.387333	-0.472086	0.167	0.154	1	0.258817	-0.385614	0.161	0.154	1	0.8577	Ttc39b
461	0.00865537	-0.464094	0.143	0.148	1	0.065048	-0.391973	0.147	0.148	1	0.856067	Ptpn2
462	0.125748	-0.388415	0.185	0.148	1	5.03731e-07	-0.467098	0.117	0.148	0.00498744	0.855513	Cdkn2aip
463	0.000164738	-0.449409	0.091	0.111	1	2.83587e-06	-0.405956	0.082	0.111	0.028078	0.855364	Gigyf1
464	0.151105	-0.428683	0.278	0.217	1	0.230888	-0.426033	0.24	0.217	1	0.854716	Rab14
465	0.86867	-0.392293	0.178	0.155	1	1.49367e-06	-0.461413	0.126	0.155	0.0147889	0.853706	Eed
466	0.0243199	-0.519533	0.229	0.213	1	0.246859	-0.333887	0.265	0.213	1	0.85342	Nfatc3
467	0.000872249	-0.407962	0.099	0.116	1	1.4757e-15	-0.444636	0.064	0.116	1.46109e-11	0.852598	Cwc25
468	5.23138e-05	-0.368961	0.343	0.234	0.517959	0.0117263	-0.479852	0.249	0.234	1	0.848813	Dnajb9
469	0.544355	-0.407557	0.159	0.147	1	1.4259e-05	-0.440873	0.122	0.147	0.141178	0.848431	Jak2
470	0.66089	-0.401538	0.145	0.133	1	1.11116e-10	-0.446593	0.09	0.133	1.10016e-06	0.848131	Arl5b
471	0.0389395	-0.406545	0.121	0.125	1	3.19018e-10	-0.441211	0.084	0.125	3.15859e-06	0.847757	Arl8b
472	0.378319	-0.423048	0.22	0.18	1	0.0161461	-0.423804	0.178	0.18	1	0.846852	Phip
473	0.8331	-0.431825	0.221	0.19	1	0.00706314	-0.414862	0.187	0.19	1	0.846686	Usp25
474	0.000436794	-0.456749	0.127	0.142	1	0.000259514	-0.387151	0.122	0.142	1	0.8439	Suz12
475	0.000450997	-0.37111	0.293	0.206	1	0.000337284	-0.472757	0.198	0.206	1	0.843867	Slbp
476	6.20384e-06	-0.404134	0.224	0.151	0.0614242	0.518349	-0.439598	0.163	0.151	1	0.843732	Gata3
477	0.498587	-0.383383	0.646	0.443	1	1.77699e-08	-0.459867	0.525	0.443	0.00017594	0.84325	Hnrnpa1
478	0.652987	-0.385001	0.142	0.124	1	4.07459e-07	-0.457919	0.092	0.124	0.00403425	0.84292	Tiparp
479	0.00010535	-0.281815	0.609	0.395	1	8.49436e-11	-0.560311	0.428	0.395	8.41027e-07	0.842126	Srsf2
480	0.0003897	-0.418988	0.101	0.118	1	1.09006e-08	-0.421808	0.082	0.118	0.000107927	0.840796	Epc2
481	0.198894	-0.418452	0.142	0.137	1	0.000111694	-0.421173	0.116	0.137	1	0.839625	Pias1
482	7.59062e-07	-0.455781	0.098	0.126	0.00751547	3.65932e-05	-0.3838	0.102	0.126	0.36231	0.839581	Zfp445
483	0.0760916	-0.420446	0.137	0.137	1	7.90315e-06	-0.418865	0.11	0.137	0.0782491	0.839311	Cops4
484	0.715336	-0.426172	0.225	0.187	1	0.0231871	-0.412771	0.19	0.187	1	0.838943	Ppp3ca
485	0.000477331	-0.452614	0.124	0.139	1	0.0373628	-0.385068	0.135	0.139	1	0.837681	Gpbp1l1
486	0.144802	-0.447354	0.165	0.157	1	0.0213887	-0.389916	0.153	0.157	1	0.83727	Syncrip
487	0.202996	-0.360795	0.112	0.112	1	1.91687e-20	-0.476165	0.053	0.112	1.89789e-16	0.83696	Klf9
488	0.00164644	-0.402119	0.088	0.103	1	5.19376e-12	-0.434718	0.06	0.103	5.14234e-08	0.836837	Qtrt1
489	0.843575	-0.383883	0.125	0.112	1	6.67941e-08	-0.452516	0.079	0.112	0.000661328	0.836399	Itga6
490	0.075211	-0.397421	0.124	0.126	1	6.48482e-08	-0.437281	0.092	0.126	0.000642062	0.834702	Ppm1a
491	0.00179008	-0.550538	0.375	0.317	1	0.0306397	-0.283521	0.438	0.317	1	0.834059	Tax1bp1
492	4.73829e-10	-0.461654	0.088	0.125	4.69138e-06	0.000193694	-0.370465	0.105	0.125	1	0.83212	Map3k1
493	0.0840976	-0.371239	0.212	0.165	1	1.03611e-06	-0.460731	0.138	0.165	0.0102585	0.83197	Rela
494	0.0916159	-0.436392	0.249	0.191	1	0.902489	-0.395548	0.222	0.191	1	0.83194	N4bp2l2
495	0.179806	-0.458603	0.424	0.303	1	0.751107	-0.372604	0.391	0.303	1	0.831207	Bcl11b
496	0.0346127	-0.401919	0.356	0.259	1	0.118922	-0.427277	0.296	0.259	1	0.829197	Pdcd6ip
497	0.422839	-0.501133	0.28	0.221	1	0.000663754	-0.327338	0.309	0.221	1	0.828471	S1pr1
498	3.19639e-06	-0.403574	0.077	0.103	0.0316475	2.1462e-13	-0.424419	0.057	0.103	2.12495e-09	0.827992	Mapk6
499	0.204372	-0.426438	0.166	0.156	1	0.00758812	-0.400769	0.149	0.156	1	0.827207	Setd2
500	0.000127192	-0.409571	0.086	0.106	1	2.85099e-11	-0.417377	0.064	0.106	2.82277e-07	0.826949	Ube2z
501	0.00106196	-0.399268	0.093	0.109	1	9.87764e-12	-0.42756	0.067	0.109	9.77985e-08	0.826828	Ankrd13c
502	0.0145687	-0.371347	0.222	0.168	1	7.09942e-05	-0.452763	0.148	0.168	0.702914	0.824109	Yy1
503	5.31693e-07	-0.362308	0.347	0.226	0.0052643	0.190616	-0.455135	0.254	0.226	1	0.817443	Smap2
504	2.73255e-06	-0.42083	0.078	0.104	0.027055	8.06105e-07	-0.39518	0.074	0.104	0.00798124	0.81601	Nifk
505	0.0053525	-0.438479	0.134	0.142	1	0.00079236	-0.377416	0.125	0.142	1	0.815895	Arfgef1
506	2.32279e-06	-0.328438	0.311	0.206	0.022998	1.02784e-05	-0.486744	0.19	0.206	0.101766	0.815182	Oser1
507	3.15838e-06	-0.351734	0.284	0.189	0.0312711	0.0185411	-0.463256	0.193	0.189	1	0.81499	Tiprl
508	0.229914	-0.400478	0.24	0.191	1	0.0126987	-0.414021	0.191	0.191	1	0.814499	Supt5
509	0.54786	-0.412326	0.157	0.145	1	0.00531576	-0.400942	0.134	0.145	1	0.813267	Nsrp1
510	0.262661	-0.403216	0.173	0.142	1	0.0408063	-0.40756	0.139	0.142	1	0.810777	Cdk17
511	0.101795	-0.408309	0.211	0.167	1	0.206931	-0.402291	0.176	0.167	1	0.8106	Zrsr2
512	1.79904e-05	-0.533594	0.147	0.173	0.178123	0.833873	-0.276807	0.191	0.173	1	0.810401	Igkc
513	0.000177272	-0.353313	0.235	0.165	1	0.000173405	-0.456948	0.148	0.165	1	0.810261	Csnk1d
514	0.000749666	-0.448348	0.125	0.138	1	0.067207	-0.36174	0.136	0.138	1	0.810088	Cul3
515	0.685639	-0.42177	0.167	0.15	1	0.150358	-0.388098	0.154	0.15	1	0.809868	Hbp1
516	0.379282	-0.390722	0.186	0.154	1	0.0107787	-0.418367	0.148	0.154	1	0.809089	Bach2
517	0.50488	-0.395922	0.125	0.118	1	0.000229363	-0.413016	0.097	0.118	1	0.808938	Hip1r
518	0.274433	-0.440764	0.472	0.337	1	0.350255	-0.367639	0.411	0.337	1	0.808403	Tcf7
519	0.907539	-0.402977	0.158	0.141	1	6.44079e-05	-0.403458	0.118	0.141	0.637703	0.806435	Susd6
520	0.196248	-0.337002	0.158	0.13	1	3.8248e-08	-0.469378	0.096	0.13	0.000378693	0.80638	Il6ra
521	0.0242479	-0.41011	0.321	0.236	1	0.61786	-0.396005	0.276	0.236	1	0.806115	Vcp
522	0.759054	-0.429166	0.676	0.473	1	0.0923028	-0.376488	0.614	0.473	1	0.805654	H2-Q6
523	0.00207501	-0.356431	0.208	0.152	1	0.000327534	-0.447671	0.135	0.152	1	0.804102	Hadhb
524	1.67924e-12	-0.433944	0.06	0.101	1.66261e-08	3.44892e-07	-0.36976	0.07	0.101	0.00341478	0.803704	Fbxl3
525	0.207397	-0.399299	0.129	0.126	1	1.11017e-05	-0.404333	0.1	0.126	0.109918	0.803632	Ctnnb1
526	0.000334057	-0.376162	0.084	0.103	1	1.02455e-15	-0.427201	0.054	0.103	1.0144e-11	0.803363	Zbtb21
527	0.000172352	-0.376612	0.423	0.283	1	0.299311	-0.426708	0.339	0.283	1	0.80332	Dnajb6
528	0.0123627	-0.414322	0.119	0.128	1	1.73513e-05	-0.387592	0.102	0.128	0.171795	0.801914	Gcn1l1
529	0.267825	-0.415655	0.363	0.272	1	0.337738	-0.385997	0.323	0.272	1	0.801652	Ikzf1
530	0.155388	-0.38035	0.695	0.483	1	5.09176e-07	-0.421043	0.593	0.483	0.00504135	0.801393	Rap1b
531	0.0100051	-0.42144	0.109	0.119	1	0.00167327	-0.37973	0.102	0.119	1	0.80117	Angel2
532	0.00196368	-0.449138	0.112	0.125	1	0.0518332	-0.35139	0.119	0.125	1	0.800528	Tnfrsf1b
533	0.126256	-0.378965	0.141	0.138	1	4.52974e-09	-0.421065	0.1	0.138	4.48489e-05	0.800029	Otulin
534	0.997132	-0.404226	0.169	0.148	1	0.0120206	-0.395288	0.141	0.148	1	0.799513	Usp16
535	0.977819	-0.443049	0.523	0.372	1	0.94149	-0.354951	0.497	0.372	1	0.797999	Eif4a1
536	3.5805e-06	-0.391378	0.076	0.102	0.0354505	8.88062e-14	-0.406377	0.056	0.102	8.7927e-10	0.797755	Dot1l
537	0.950617	-0.453648	0.218	0.187	1	0.583525	-0.343645	0.219	0.187	1	0.797293	Icos
538	0.000281519	-0.388987	0.097	0.116	1	3.33161e-12	-0.40828	0.071	0.116	3.29862e-08	0.797267	Gtf2h1
539	1.56618e-05	-0.315365	0.211	0.144	0.155067	5.7052e-06	-0.479843	0.118	0.144	0.0564872	0.795208	Irf2bpl
540	0.369043	-0.286025	0.76	0.508	1	1.15832e-15	-0.506676	0.585	0.508	1.14685e-11	0.792702	H2-Q4
541	0.552792	-0.431113	0.201	0.178	1	0.34326	-0.361572	0.193	0.178	1	0.792685	Pbrm1
542	0.3504	-0.347441	0.163	0.137	1	3.82814e-10	-0.444408	0.096	0.137	3.79024e-06	0.79185	Alkbh5
543	0.167144	-0.393579	0.204	0.163	1	0.0636383	-0.398143	0.165	0.163	1	0.791722	Sar1a
544	0.285204	-0.412228	0.139	0.135	1	0.220355	-0.379024	0.136	0.135	1	0.791252	Rilpl2
545	0.290544	-0.365665	0.147	0.125	1	2.74045e-05	-0.425346	0.099	0.125	0.271332	0.791011	Ptger4
546	0.286453	-0.430014	0.261	0.206	1	0.876296	-0.360399	0.244	0.206	1	0.790413	Atp11b
547	0.564921	-0.381289	0.195	0.163	1	0.00236037	-0.408687	0.154	0.163	1	0.789976	Nup153
548	0.310868	-0.432479	0.565	0.407	1	0.520964	-0.357324	0.549	0.407	1	0.789803	Hnrnpk
549	0.0245277	-0.379405	0.21	0.161	1	0.0988204	-0.409478	0.165	0.161	1	0.788883	Ppp2r2a
550	0.000302621	-0.34826	0.348	0.241	1	0.0216707	-0.440196	0.26	0.241	1	0.788456	Prrc2a
551	5.25409e-05	-0.287871	0.874	0.695	0.520207	3.73202e-29	-0.499656	0.791	0.695	3.69507e-25	0.787527	Zfp36l2
552	0.0110496	-0.393089	0.109	0.12	1	1.25779e-05	-0.394138	0.093	0.12	0.124534	0.787227	Piezo1
553	0.00485821	-0.472646	0.176	0.177	1	0.621761	-0.313952	0.208	0.177	1	0.786599	Cbx3
554	0.0856348	-0.365407	0.1	0.104	1	8.08647e-15	-0.420922	0.056	0.104	8.00642e-11	0.786329	Tfip11
555	0.0468133	-0.303494	0.151	0.121	1	5.45645e-10	-0.482058	0.081	0.121	5.40243e-06	0.785552	Furin
556	9.37283e-07	-0.407374	0.078	0.105	0.00928004	1.38841e-08	-0.376594	0.07	0.105	0.000137466	0.783968	Nup98
557	0.619957	-0.381614	0.171	0.146	1	0.00128304	-0.399713	0.131	0.146	1	0.781326	Ddx47
558	9.89264e-07	-0.392402	0.092	0.121	0.0097947	2.91215e-11	-0.388778	0.077	0.121	2.88332e-07	0.78118	Prkcd
559	0.000260751	-0.392575	0.098	0.117	1	3.71474e-06	-0.388256	0.089	0.117	0.0367796	0.780831	Tet2
560	0.323884	-0.348681	0.155	0.13	1	9.96009e-07	-0.426496	0.1	0.13	0.00986149	0.775177	Egln2
561	0.00924989	-0.430007	0.437	0.303	1	0.377633	-0.345156	0.391	0.303	1	0.775163	Fyn
562	1.92874e-06	-0.327692	0.314	0.208	0.0190965	0.000768248	-0.446377	0.203	0.208	1	0.774069	Plcxd2
563	0.321175	-0.411073	0.124	0.12	1	0.171941	-0.362701	0.119	0.12	1	0.773774	Usp9x
564	0.734881	-0.350206	0.131	0.116	1	1.46667e-06	-0.423481	0.087	0.116	0.0145215	0.773687	Usp38
565	0.00156684	-0.391615	0.09	0.106	1	2.27937e-06	-0.381933	0.077	0.106	0.022568	0.773548	Zbtb11
566	0.0144807	-0.401725	0.102	0.111	1	6.78447e-05	-0.371729	0.088	0.111	0.671731	0.773454	Dyrk1a
567	0.20056	-0.397034	0.193	0.157	1	0.799108	-0.376083	0.174	0.157	1	0.773117	Pdhb
568	0.0155748	-0.405032	0.299	0.221	1	0.359613	-0.367724	0.274	0.221	1	0.772755	G3bp2
569	0.00026654	-0.293739	0.526	0.349	1	1.25046e-06	-0.477946	0.38	0.349	0.0123808	0.771685	Calr
570	0.000585016	-0.344206	0.239	0.17	1	0.00090547	-0.427447	0.159	0.17	1	0.771654	Atg2a
571	5.64928e-05	-0.42841	0.088	0.109	0.559336	0.0381431	-0.343081	0.101	0.109	1	0.771491	Cpsf7
572	0.000965346	-0.36843	0.26	0.185	1	0.0637312	-0.402991	0.192	0.185	1	0.771421	Cyth1
573	0.0575358	-0.389348	0.115	0.119	1	0.000234104	-0.380592	0.098	0.119	1	0.76994	Topors
574	2.48458e-05	-0.430723	0.08	0.103	0.245999	0.000617446	-0.33776	0.083	0.103	1	0.768483	Arl5a
575	0.00230813	-0.398282	0.264	0.191	1	0.678743	-0.369814	0.226	0.191	1	0.768096	Eif4a3
576	0.000111102	-0.397473	0.092	0.112	1	5.62178e-05	-0.37048	0.089	0.112	0.556613	0.767953	Pabpc4
577	0.89896	-0.391983	0.175	0.154	1	0.00225546	-0.375341	0.14	0.154	1	0.767324	Rab8b
578	4.98702e-08	-0.490044	0.117	0.158	0.000493765	0.0934252	-0.277039	0.146	0.158	1	0.767083	H2-Ab1
579	0.0042701	-0.348363	0.225	0.165	1	0.00184568	-0.412041	0.155	0.165	1	0.760403	Arap2
580	0.0693673	-0.369144	0.164	0.13	1	0.101821	-0.389791	0.128	0.13	1	0.758935	Ing1
581	0.000346459	-0.387621	0.088	0.107	1	7.29113e-05	-0.37011	0.084	0.107	0.721895	0.757731	Dcaf15
582	0.0247865	-0.362822	0.237	0.18	1	0.0420235	-0.394588	0.183	0.18	1	0.75741	Nop56
583	2.01212e-06	-0.384731	0.08	0.107	0.019922	2.16745e-08	-0.371976	0.072	0.107	0.0002146	0.756707	Slc7a1
584	0.0544458	-0.393608	0.249	0.191	1	0.813864	-0.363069	0.224	0.191	1	0.756677	Crebbp
585	0.251533	-0.444337	0.267	0.21	1	0.0119243	-0.311169	0.279	0.21	1	0.755506	Mier1
586	0.469484	-0.365573	0.165	0.14	1	0.000101575	-0.389848	0.118	0.14	1	0.755421	Prkcsh
587	0.00713632	-0.392701	0.099	0.111	1	6.4909e-05	-0.361559	0.087	0.111	0.642664	0.754259	Ptbp2
588	0.38989	-0.372742	0.122	0.116	1	0.000439662	-0.381048	0.098	0.116	1	0.75379	Zfp592
589	3.66885e-07	-0.345609	0.275	0.18	0.00363253	0.875816	-0.406772	0.21	0.18	1	0.75238	Nme1
590	0.00509267	-0.395669	0.1	0.112	1	0.0111531	-0.3555	0.1	0.112	1	0.75117	Med13
591	0.895803	-0.365434	0.115	0.106	1	0.000631307	-0.38539	0.087	0.106	1	0.750824	Crbn
592	0.00217904	-0.394753	0.091	0.106	1	0.000720971	-0.356004	0.087	0.106	1	0.750758	Haus3
593	0.00681124	-0.386716	0.104	0.116	1	0.000469111	-0.363686	0.096	0.116	1	0.750402	Brd8
594	0.40537	-0.382296	0.145	0.137	1	0.00624255	-0.368073	0.125	0.137	1	0.750369	Ppp1r12c
595	0.730441	-0.354092	0.119	0.105	1	0.000365843	-0.395963	0.086	0.105	1	0.750055	Prr7
596	0.794303	-0.393446	0.129	0.116	1	0.00174459	-0.356475	0.098	0.116	1	0.749921	Ikzf2
597	0.000430972	-0.322305	0.188	0.134	1	0.000378631	-0.425618	0.116	0.134	1	0.747923	Rnf125
598	1.49859e-05	-0.328285	0.295	0.201	0.148376	0.268416	-0.416858	0.222	0.201	1	0.745144	Eif5b
599	6.51259e-07	-0.347497	0.324	0.213	0.00644811	0.609956	-0.396508	0.244	0.213	1	0.744005	Rassf5
600	0.0169525	-0.365495	0.216	0.163	1	0.718446	-0.378198	0.183	0.163	1	0.743693	Tcp11l2
601	0.319652	-0.397673	0.177	0.147	1	0.904851	-0.345906	0.163	0.147	1	0.743579	Rbm5
602	0.00523601	-0.370819	0.098	0.111	1	3.60397e-07	-0.371949	0.079	0.111	0.00356829	0.742768	Katna1
603	0.273593	-0.378	0.13	0.126	1	0.00116988	-0.362857	0.109	0.126	1	0.740857	Med1
604	0.00378227	-0.374666	0.222	0.163	1	0.617179	-0.365147	0.18	0.163	1	0.739813	Psmd11
605	0.270043	-0.325047	0.123	0.104	1	8.14038e-08	-0.414353	0.071	0.104	0.000805979	0.7394	Tmem64
606	0.00245141	-0.375662	0.398	0.278	1	0.929876	-0.363559	0.341	0.278	1	0.739221	Top1
607	0.319031	-0.353871	0.114	0.111	1	1.45669e-07	-0.384878	0.079	0.111	0.00144227	0.738749	Mfsd14a
608	0.000293279	-0.319306	0.558	0.363	1	0.0505584	-0.418065	0.451	0.363	1	0.737372	Prkar1a
609	0.000157561	-0.407217	0.089	0.109	1	0.00912095	-0.329361	0.096	0.109	1	0.736578	Mtf2
610	0.108174	-0.380544	0.122	0.124	1	0.00729177	-0.355546	0.111	0.124	1	0.73609	Arhgap17
611	0.33566	-0.361035	0.117	0.114	1	0.000110766	-0.374867	0.092	0.114	1	0.735902	Mark3
612	0.533822	-0.333443	0.125	0.109	1	1.75567e-08	-0.401225	0.074	0.109	0.000173829	0.734668	Eif2ak3
613	0.000157029	-0.354371	0.264	0.185	1	0.723552	-0.379526	0.209	0.185	1	0.733897	Grb2
614	5.37327e-06	-0.362418	0.287	0.194	0.0532008	0.430352	-0.371174	0.234	0.194	1	0.733592	Pbxip1
615	0.82342	-0.36531	0.127	0.113	1	0.0263242	-0.367765	0.104	0.113	1	0.733075	Arid1b
616	1.13899e-15	-0.260214	0.479	0.277	1.12771e-11	0.0178309	-0.472402	0.311	0.277	1	0.732615	Brd4
617	0.292575	-0.371178	0.121	0.118	1	0.0258496	-0.358207	0.109	0.118	1	0.729385	Smu1
618	0.027635	-0.415154	0.285	0.212	1	0.0774797	-0.314184	0.272	0.212	1	0.729338	Selenos
619	0.299354	-0.366756	0.125	0.121	1	0.00139226	-0.361879	0.104	0.121	1	0.728635	Pip5k1a
620	0.0637491	-0.393171	0.258	0.198	1	0.252378	-0.335061	0.245	0.198	1	0.728232	Smchd1
621	0.178709	-0.33757	0.157	0.129	1	0.000449385	-0.390436	0.11	0.129	1	0.728006	Mdm2
622	0.18734	-0.356497	0.184	0.149	1	0.0649345	-0.370505	0.149	0.149	1	0.727001	Rexo1
623	0.4144	-0.356504	0.174	0.146	1	0.00124207	-0.370096	0.13	0.146	1	0.7266	Edem1
624	1.48863e-06	-0.334241	0.304	0.201	0.0147389	0.64607	-0.391409	0.231	0.201	1	0.72565	Pofut2
625	0.806987	-0.355129	0.143	0.127	1	0.0108618	-0.370468	0.116	0.127	1	0.725597	Rab1a
626	0.0891626	-0.359887	0.184	0.146	1	0.232534	-0.365228	0.151	0.146	1	0.725116	Rnf44
627	0.449867	-0.379517	0.154	0.131	1	0.457837	-0.345479	0.137	0.131	1	0.724996	Ilf2
628	0.0355688	-0.394057	0.308	0.229	1	0.246889	-0.329744	0.287	0.229	1	0.7238	Bzw1
629	0.0557446	-0.340538	0.095	0.102	1	4.95162e-11	-0.382331	0.061	0.102	4.9026e-07	0.72287	Fam117b
630	0.0863309	-0.364371	0.107	0.111	1	2.7389e-06	-0.358004	0.082	0.111	0.0271178	0.722375	Ythdf3
631	0.334898	-0.378789	0.181	0.151	1	0.715002	-0.343323	0.164	0.151	1	0.722112	Nop58
632	0.120364	-0.351233	0.166	0.135	1	0.119037	-0.370822	0.134	0.135	1	0.722056	Gch1
633	0.0249012	-0.376307	0.096	0.104	1	0.00569531	-0.344229	0.09	0.104	1	0.720536	Tbc1d15
634	0.000213247	-0.427786	0.083	0.103	1	0.906947	-0.292639	0.11	0.103	1	0.720425	Ubash3b
635	7.15212e-05	-0.35801	0.261	0.181	0.708131	0.65024	-0.362286	0.213	0.181	1	0.720296	Mbp
636	0.269525	-0.396862	0.242	0.192	1	0.967253	-0.323033	0.222	0.192	1	0.719895	Map4k2
637	0.500906	-0.450921	0.554	0.383	1	0.00168755	-0.268891	0.565	0.383	1	0.719812	Cd53
638	0.0913716	-0.410409	0.675	0.47	1	0.323363	-0.309005	0.641	0.47	1	0.719414	Jak1
639	0.000219511	-0.324362	0.777	0.557	1	2.10394e-12	-0.394851	0.696	0.557	2.08311e-08	0.719213	Ywhaz
640	0.382318	-0.32732	0.158	0.134	1	4.96648e-05	-0.391555	0.11	0.134	0.491731	0.718875	Sde2
641	0.122421	-0.357745	0.104	0.107	1	0.00029849	-0.360393	0.087	0.107	1	0.718138	Prpf38a
642	0.673226	-0.373382	0.151	0.132	1	0.312658	-0.343625	0.135	0.132	1	0.717007	Xpo1
643	0.00149896	-0.387211	0.091	0.106	1	0.0109758	-0.328633	0.094	0.106	1	0.715844	Mlxip
644	0.00992302	-0.413064	0.277	0.204	1	0.0443644	-0.302222	0.261	0.204	1	0.715287	Fryl
645	0.451031	-0.346571	0.161	0.137	1	0.0017514	-0.36797	0.121	0.137	1	0.714541	Bcl2l11
646	0.0764524	-0.320673	0.152	0.122	1	6.67224e-07	-0.393795	0.091	0.122	0.00660619	0.714468	Lrrc47
647	0.692881	-0.355677	0.112	0.106	1	0.00137309	-0.35875	0.088	0.106	1	0.714428	Zfp326
648	0.000610325	-0.341128	0.32	0.227	1	0.218851	-0.372066	0.25	0.227	1	0.713194	Bptf
649	4.68491e-07	-0.347969	0.393	0.255	0.00463853	0.254681	-0.364427	0.326	0.255	1	0.712397	Lbh
650	0.0356218	-0.405905	0.253	0.191	1	0.0282505	-0.306097	0.25	0.191	1	0.712002	Rbm8a
651	0.138092	-0.394811	0.236	0.186	1	0.717287	-0.31617	0.217	0.186	1	0.710981	Tpp2
652	0.144911	-0.354451	0.185	0.15	1	0.205154	-0.35621	0.154	0.15	1	0.710661	Fnbp4
653	5.3199e-07	-0.323571	0.319	0.21	0.00526724	0.695841	-0.387052	0.253	0.21	1	0.710623	Pde7a
654	7.80792e-07	-0.327564	0.326	0.213	0.00773062	0.793573	-0.382865	0.25	0.213	1	0.710429	Cct4
655	0.827194	-0.360091	0.147	0.133	1	0.103842	-0.349941	0.132	0.133	1	0.710033	Hivep2
656	0.932286	-0.386416	0.132	0.118	1	0.468549	-0.322134	0.123	0.118	1	0.708551	Helz
657	1.83426e-07	-0.315039	0.295	0.193	0.0018161	0.53083	-0.392701	0.216	0.193	1	0.707741	Ptk2b
658	0.148754	-0.330806	0.174	0.141	1	0.00164771	-0.376561	0.126	0.141	1	0.707367	Pcf11
659	0.0120842	-0.377776	0.103	0.113	1	0.00366085	-0.329253	0.098	0.113	1	0.707029	Fam120a
660	4.27906e-07	-0.318265	0.477	0.305	0.0042367	0.26159	-0.388155	0.365	0.305	1	0.706421	Arf4
661	0.000161706	-0.326556	0.197	0.139	1	0.128074	-0.379283	0.14	0.139	1	0.705839	Phf1
662	0.067241	-0.371891	0.257	0.199	1	0.876901	-0.333772	0.231	0.199	1	0.705663	Rock1
663	0.977367	-0.304801	0.112	0.104	1	9.28068e-12	-0.399979	0.061	0.104	9.1888e-08	0.70478	Rnf149
664	0.0760442	-0.373661	0.099	0.104	1	0.000620805	-0.330141	0.084	0.104	1	0.703801	Slco3a1
665	0.00120558	-0.383044	0.224	0.162	1	0.0320895	-0.320489	0.208	0.162	1	0.703534	Clint1
666	0.000872332	-0.352785	0.454	0.306	1	0.551866	-0.350152	0.397	0.306	1	0.702937	Rps12-ps3
667	0.923509	-0.315637	0.671	0.489	1	0.00110682	-0.386977	0.602	0.489	1	0.702615	Txnip
668	0.000159701	-0.413174	0.368	0.25	1	0.000122077	-0.288442	0.359	0.25	1	0.701616	Ankrd44
669	0.701175	-0.349437	0.123	0.115	1	0.00183592	-0.351534	0.099	0.115	1	0.700971	Usp47
670	0.867757	-0.34439	0.14	0.128	1	0.00319434	-0.355783	0.113	0.128	1	0.700173	Ssbp3
671	0.0926195	-0.360036	0.21	0.166	1	0.994052	-0.340039	0.188	0.166	1	0.700076	Rad21
672	0.000885643	-0.302859	0.169	0.123	1	0.00102858	-0.39716	0.106	0.123	1	0.70002	5430416N02Rik
673	0.037978	-0.328325	0.159	0.125	1	0.0117202	-0.371467	0.114	0.125	1	0.699791	Tle4
674	0.0549413	-0.341736	0.095	0.101	1	1.18181e-07	-0.357323	0.069	0.101	0.00117011	0.699059	Appbp2
675	0.0615882	-0.348347	0.095	0.101	1	3.06178e-06	-0.350288	0.073	0.101	0.0303147	0.698635	Ilf3
676	0.195078	-0.310776	0.137	0.113	1	2.64723e-06	-0.386971	0.085	0.113	0.0262102	0.697747	Kbtbd2
677	0.000120624	-0.32588	0.224	0.157	1	0.290939	-0.370815	0.166	0.157	1	0.696695	Nub1
678	0.108327	-0.357413	0.11	0.112	1	0.000886779	-0.33855	0.094	0.112	1	0.695963	Smg7
679	0.826244	-0.323893	0.119	0.111	1	2.35749e-06	-0.369406	0.082	0.111	0.0233415	0.693299	Cc2d1b
680	0.0407576	-0.341984	0.194	0.151	1	0.374402	-0.350302	0.16	0.151	1	0.692285	Klhl24
681	0.00990527	-0.377913	0.268	0.198	1	0.227874	-0.313527	0.245	0.198	1	0.69144	Thrap3
682	1.35033e-07	-0.278975	0.531	0.332	0.00133696	0.0770475	-0.411332	0.404	0.332	1	0.690308	Nop53
683	0.442688	-0.378071	0.192	0.161	1	0.90556	-0.311963	0.181	0.161	1	0.690033	Cab39
684	0.448367	-0.344203	0.138	0.118	1	0.0769493	-0.345505	0.114	0.118	1	0.689708	Rabggtb
685	0.058261	-0.380883	0.212	0.164	1	0.218996	-0.307755	0.201	0.164	1	0.688638	Elf2
686	0.0150569	-0.361307	0.187	0.143	1	0.483524	-0.326548	0.166	0.143	1	0.687855	Chd8
687	0.00560618	-0.352748	0.215	0.16	1	0.686258	-0.335085	0.185	0.16	1	0.687833	Znrf2
688	0.00640546	-0.297559	0.173	0.13	1	0.000434469	-0.39	0.112	0.13	1	0.687559	Chmp1b
689	0.0796993	-0.325629	0.173	0.139	1	0.0540076	-0.361774	0.135	0.139	1	0.687403	Herpud1
690	1.06823e-115	-0.28141	0.996	0.988	1.05765e-111	5.69278e-203	-0.405868	0.984	0.988	5.63642e-199	0.687278	Rps21
691	0.675305	-0.391188	0.123	0.115	1	0.32183	-0.295955	0.134	0.115	1	0.687144	Msi2
692	0.309979	-0.326069	0.144	0.122	1	0.0411546	-0.36101	0.115	0.122	1	0.687079	Tardbp
693	0.323683	-0.369135	0.133	0.112	1	0.933475	-0.317112	0.124	0.112	1	0.686248	Aqr
694	3.46648e-75	-0.303396	0.989	0.957	3.43216e-71	6.14058e-105	-0.381964	0.978	0.957	6.07979e-101	0.685361	Rps12
695	0.136858	-0.348097	0.155	0.126	1	0.677786	-0.335012	0.135	0.126	1	0.683108	Cbx7
696	1.60429e-05	-0.34091	0.36	0.241	0.158841	0.333124	-0.341562	0.304	0.241	1	0.682471	Chd4
697	0.432493	-0.342945	0.167	0.142	1	0.22561	-0.339205	0.145	0.142	1	0.68215	Picalm
698	2.15187e-08	-0.274661	0.354	0.226	0.000213057	0.0161606	-0.406325	0.239	0.226	1	0.680987	Atp1a1
699	0.60917	-0.334632	0.128	0.112	1	0.000729868	-0.346329	0.093	0.112	1	0.680961	Rlf
700	0.0057425	-0.329087	0.21	0.157	1	0.409569	-0.351136	0.168	0.157	1	0.680223	Trpc4ap
701	7.20501e-05	-0.322241	0.506	0.337	0.713368	0.527868	-0.35693	0.442	0.337	1	0.67917	Bcl2
702	0.168517	-0.354008	0.153	0.125	1	0.938048	-0.324248	0.138	0.125	1	0.678256	Madd
703	0.0283769	-0.373978	0.101	0.109	1	0.573999	-0.303637	0.113	0.109	1	0.677615	Eif2a
704	0.752861	-0.362004	0.143	0.131	1	0.252972	-0.315598	0.132	0.131	1	0.677602	Baz1a
705	3.0745e-07	-0.346701	0.356	0.23	0.00304406	0.0413392	-0.329168	0.304	0.23	1	0.675868	H13
706	0.013581	-0.305175	0.141	0.108	1	0.00396034	-0.370415	0.093	0.108	1	0.67559	Ranbp10
707	0.0510132	-0.308972	0.165	0.13	1	0.0039615	-0.364948	0.117	0.13	1	0.67392	Ralgps2
708	0.000158291	-0.348368	0.245	0.172	1	0.223238	-0.325096	0.21	0.172	1	0.673463	Napa
709	0.243719	-0.340429	0.138	0.115	1	0.68112	-0.332187	0.123	0.115	1	0.672616	Ikbke
710	0.000707005	-0.32641	0.182	0.131	1	0.683937	-0.344228	0.141	0.131	1	0.670638	Ddx54
711	1.49247e-05	-0.362372	0.347	0.232	0.147769	0.00170052	-0.308003	0.324	0.232	1	0.670375	Rab11b
712	0.800419	-0.346478	0.148	0.131	1	0.287901	-0.323029	0.134	0.131	1	0.669507	Cdv3
713	0.0969822	-0.353056	0.103	0.106	1	0.0532921	-0.315269	0.099	0.106	1	0.668325	Ubp1
714	0.436891	-0.369486	0.131	0.124	1	0.420883	-0.296352	0.128	0.124	1	0.665838	Tmem259
715	0.000179291	-0.33594	0.481	0.319	1	0.454606	-0.329273	0.416	0.319	1	0.665212	Prrc2c
716	3.13268e-07	-0.368814	0.399	0.255	0.00310166	0.000112379	-0.296046	0.369	0.255	1	0.664861	Psmb4
717	6.49144e-05	-0.341121	0.21	0.145	0.642717	0.446981	-0.323707	0.171	0.145	1	0.664828	Dnajc5
718	9.88605e-05	-0.315664	0.263	0.184	0.978817	0.626042	-0.348788	0.206	0.184	1	0.664452	Srsf10
719	3.3289e-07	-0.317048	0.464	0.296	0.00329594	0.489789	-0.347328	0.381	0.296	1	0.664376	Peli1
720	0.005048	-0.287132	0.149	0.113	1	0.000913864	-0.376747	0.094	0.113	1	0.663879	Phlda1
721	0.00589146	-0.327263	0.208	0.155	1	0.281704	-0.334557	0.163	0.155	1	0.661819	Myo9b
722	0.00622317	-0.301361	0.169	0.127	1	0.0340153	-0.359459	0.121	0.127	1	0.66082	Itpr3
723	2.79335e-11	-0.27998	0.525	0.317	2.76569e-07	0.485284	-0.379969	0.419	0.317	1	0.659949	Ezr
724	4.7783e-05	-0.276216	0.156	0.107	0.4731	0.000602827	-0.383732	0.089	0.107	1	0.659947	Rras2
725	0.00386833	-0.283812	0.15	0.112	1	0.00321518	-0.37524	0.097	0.112	1	0.659052	Fam46c
726	0.0368932	-0.299578	0.145	0.114	1	0.000954279	-0.358852	0.096	0.114	1	0.65843	Rps6kb1
727	0.197376	-0.383357	0.18	0.147	1	0.0147588	-0.274899	0.191	0.147	1	0.658255	Cyld
728	1.74314e-09	-0.31727	0.273	0.17	1.72588e-05	0.469273	-0.340317	0.203	0.17	1	0.657587	Il21r
729	0.00834168	-0.353199	0.229	0.172	1	0.217486	-0.304325	0.209	0.172	1	0.657524	Tuba1c
730	8.30896e-15	-0.271725	0.337	0.195	8.2267e-11	0.428409	-0.384755	0.239	0.195	1	0.656479	Cops8
731	0.00421266	-0.302096	0.151	0.112	1	0.00521964	-0.354091	0.098	0.112	1	0.656187	Faah
732	0.00788462	-0.315545	0.164	0.125	1	0.584679	-0.340588	0.132	0.125	1	0.656133	Gle1
733	5.22623e-09	-0.288515	0.248	0.158	5.17449e-05	0.780078	-0.36674	0.174	0.158	1	0.655255	Rtn4
734	0.0290751	-0.337008	0.187	0.147	1	0.131522	-0.317195	0.179	0.147	1	0.654203	Neurl3
735	0.00214887	-0.370311	0.335	0.239	1	0.0434767	-0.282345	0.31	0.239	1	0.652656	Diaph1
736	0.233015	-0.33997	0.125	0.105	1	0.658971	-0.31263	0.11	0.105	1	0.6526	Kmt5b
737	5.77026e-09	-0.268193	0.323	0.208	5.71314e-05	0.117693	-0.383682	0.222	0.208	1	0.651875	Inpp5d
738	0.720032	-0.353291	0.111	0.099	1	0.490141	-0.297741	0.114	0.099	1	0.651032	Usp15
739	0.00384505	-0.308068	0.146	0.108	1	0.0237778	-0.342589	0.098	0.108	1	0.650657	Mau2
740	0.488296	-0.352957	0.134	0.127	1	0.595547	-0.296862	0.134	0.127	1	0.649818	Wapl
741	6.41148e-34	-0.337862	0.922	0.747	6.348e-30	1.7195e-27	-0.310842	0.873	0.747	1.70248e-23	0.648703	Rps25
742	0.000144483	-0.275502	0.171	0.12	1	0.00116233	-0.372954	0.103	0.12	1	0.648456	Atg101
743	0.783825	-0.341632	0.113	0.106	1	0.132289	-0.306414	0.102	0.106	1	0.648046	Atp6ap2
744	2.39801e-20	-0.252366	0.43	0.238	2.37427e-16	0.21326	-0.395287	0.304	0.238	1	0.647653	Arl4c
745	7.14248e-07	-0.302112	0.278	0.185	0.00707177	0.846929	-0.344909	0.214	0.185	1	0.647021	Gsk3b
746	0.229459	-0.366883	0.67	0.46	1	0.404972	-0.279902	0.631	0.46	1	0.646785	Pcbp2
747	0.641181	-0.372537	0.156	0.135	1	0.463015	-0.27125	0.156	0.135	1	0.643787	Usp34
748	4.3477e-09	-0.312955	0.439	0.275	4.30466e-05	0.0594093	-0.329761	0.367	0.275	1	0.642716	Kmt2e
749	2.6914e-08	-0.318721	0.288	0.185	0.000266475	0.103672	-0.323958	0.232	0.185	1	0.642679	Arid4b
750	9.60607e-08	-0.306653	0.481	0.298	0.000951097	0.143267	-0.335299	0.407	0.298	1	0.641952	Set
751	0.581825	-0.327454	0.153	0.132	1	0.14067	-0.313152	0.131	0.132	1	0.640606	Xpo6
752	0.00469322	-0.341804	0.217	0.161	1	0.142487	-0.298526	0.198	0.161	1	0.64033	Nisch
753	0.0924456	-0.38873	0.114	0.116	1	0.315257	-0.25108	0.136	0.116	1	0.63981	Hspa14
754	6.86057e-08	-0.338247	0.44	0.279	0.000679265	0.00133548	-0.301255	0.393	0.279	1	0.639502	Pafah1b1
755	0.000235479	-0.363748	0.288	0.202	1	0.00132019	-0.275732	0.276	0.202	1	0.63948	Foxn3
756	0.00517453	-0.323579	0.205	0.153	1	0.734409	-0.315197	0.175	0.153	1	0.638776	Ppp1cb
757	0.439696	-0.315861	0.122	0.105	1	0.0980922	-0.322318	0.1	0.105	1	0.63818	Vamp3
758	0.00102493	-0.352373	0.272	0.194	1	0.00714533	-0.285058	0.26	0.194	1	0.637431	Pum2
759	0.000263945	-0.329446	0.236	0.167	1	0.109396	-0.306102	0.209	0.167	1	0.635548	Zfp292
760	0.198884	-0.334208	0.134	0.111	1	0.758366	-0.30063	0.124	0.111	1	0.634838	Man1a
761	0.148873	-0.349786	0.177	0.144	1	0.0625454	-0.284846	0.181	0.144	1	0.634632	Tle3
762	0.437152	-0.343073	0.151	0.129	1	0.677526	-0.291246	0.146	0.129	1	0.634318	Psmb7
763	0.600375	-0.331125	0.106	0.102	1	0.193909	-0.300383	0.099	0.102	1	0.631507	Cnot6
764	1.12505e-10	-0.271568	0.27	0.166	1.11392e-06	0.47347	-0.357951	0.18	0.166	1	0.629519	Fam168b
765	0.20611	-0.372679	0.191	0.156	1	0.0473318	-0.256598	0.196	0.156	1	0.629277	Trip12
766	0.00548306	-0.307515	0.158	0.118	1	0.902641	-0.320792	0.129	0.118	1	0.628307	Pik3ip1
767	4.31055e-07	-0.306356	0.254	0.167	0.00426788	0.265857	-0.321623	0.203	0.167	1	0.627979	Mbd2
768	0.232082	-0.361387	0.161	0.134	1	0.027741	-0.266397	0.169	0.134	1	0.627784	Samsn1
769	1.08608e-09	-0.274811	0.236	0.146	1.07533e-05	0.723235	-0.352553	0.16	0.146	1	0.627364	Mllt3
770	0.0154294	-0.272217	0.141	0.109	1	0.000829058	-0.354454	0.091	0.109	1	0.626671	Ndel1
771	0.778969	-0.326773	0.113	0.106	1	0.100065	-0.299722	0.1	0.106	1	0.626494	Sec24c
772	1.92069e-05	-0.321599	0.227	0.155	0.190167	0.0826952	-0.304393	0.194	0.155	1	0.625992	Ttc14
773	0.881033	-0.311721	0.111	0.101	1	0.0335712	-0.314057	0.091	0.101	1	0.625777	Brd1
774	0.089271	-0.315478	0.146	0.118	1	0.773806	-0.308165	0.126	0.118	1	0.623643	Gapvd1
775	7.70379e-10	-0.26304	0.498	0.305	7.62753e-06	0.56617	-0.360271	0.401	0.305	1	0.623311	H2afy
776	0.246227	-0.307204	0.135	0.112	1	0.153732	-0.316063	0.111	0.112	1	0.623267	Nob1
777	0.000167361	-0.286414	0.195	0.138	1	0.049817	-0.335653	0.133	0.138	1	0.622067	Rpn1
778	0.230707	-0.359932	0.118	0.117	1	0.765298	-0.262094	0.13	0.117	1	0.622026	Dennd1b
779	5.81341e-05	-0.354256	0.255	0.176	0.575585	0.000250006	-0.267051	0.246	0.176	1	0.621307	Ubap2l
780	1.38955e-05	-0.311262	0.235	0.16	0.13758	0.281437	-0.310018	0.193	0.16	1	0.62128	Twistnb
781	0.000204583	-0.300359	0.188	0.134	1	0.590867	-0.320541	0.142	0.134	1	0.6209	Atf1
782	6.39207e-14	-0.257107	0.261	0.15	6.32878e-10	0.530912	-0.363298	0.162	0.15	1	0.620406	Isca1
783	6.19484e-06	-0.308574	0.273	0.184	0.0613351	0.225514	-0.311531	0.227	0.184	1	0.620105	Actn4
784	0.842978	-0.31078	0.114	0.106	1	0.022969	-0.308635	0.096	0.106	1	0.619415	Smad4
785	5.52686e-10	-0.278784	0.336	0.208	5.47214e-06	0.365583	-0.338136	0.258	0.208	1	0.61692	Eif4ebp2
786	0.189974	-0.356639	0.126	0.124	1	0.938439	-0.259709	0.136	0.124	1	0.616349	Ppp6r1
787	5.50442e-06	-0.304279	0.273	0.185	0.0544993	0.257499	-0.311437	0.226	0.185	1	0.615716	Sorl1
788	0.000208412	-0.291356	0.19	0.136	1	0.085868	-0.324234	0.132	0.136	1	0.61559	Mxd1
789	0.193785	-0.3603	0.779	0.551	1	0.926921	-0.253993	0.761	0.551	1	0.614293	Hmgb2
790	0.00121205	-0.362161	0.211	0.155	1	0.000170167	-0.251787	0.214	0.155	1	0.613949	AU020206
791	0.000134244	-0.318731	0.241	0.169	1	0.0677955	-0.294768	0.214	0.169	1	0.613499	Ikbkb
792	0.0028767	-0.285485	0.143	0.106	1	0.195533	-0.327944	0.104	0.106	1	0.613429	Rai1
793	0.593331	-0.333948	0.115	0.109	1	0.513283	-0.277893	0.112	0.109	1	0.61184	Ep300
794	0.992887	-0.320576	0.117	0.107	1	0.0202686	-0.290964	0.096	0.107	1	0.61154	Uggt1
795	2.40127e-16	-0.276122	0.45	0.255	2.3775e-12	0.00514707	-0.334814	0.358	0.255	1	0.610936	Syf2
796	0.00145981	-0.295268	0.15	0.109	1	0.487044	-0.314178	0.113	0.109	1	0.609446	Vezf1
797	2.92121e-09	-0.332635	0.31	0.194	2.89229e-05	5.78764e-05	-0.275684	0.278	0.194	0.573034	0.608318	Arhgap15
798	1.98499e-05	-0.329585	0.314	0.214	0.196534	0.00421548	-0.275376	0.289	0.214	1	0.604962	Nipbl
799	0.000274347	-0.300143	0.153	0.109	1	0.258917	-0.304145	0.128	0.109	1	0.604288	Tceal9
800	2.386e-06	-0.350613	0.303	0.2	0.0236238	0.000264288	-0.253598	0.282	0.2	1	0.604211	Kif21b
801	8.49197e-09	-0.279952	0.208	0.129	8.4079e-05	0.898496	-0.323187	0.142	0.129	1	0.603139	Epb41
802	8.50569e-15	-0.251364	0.299	0.173	8.42148e-11	0.425388	-0.351721	0.208	0.173	1	0.603084	Bcl10
803	0.00645186	-0.308431	0.16	0.121	1	0.590628	-0.292689	0.137	0.121	1	0.60112	Pura
804	0.0185702	-0.292941	0.716	0.457	1	0.50167	-0.30772	0.632	0.457	1	0.600661	Arhgef1
805	1.26774e-08	-0.298948	0.369	0.236	0.000125519	0.353782	-0.301418	0.291	0.236	1	0.600367	Hectd1
806	1.25203e-06	-0.28022	0.195	0.129	0.0123963	0.864902	-0.318182	0.144	0.129	1	0.598402	Tspyl1
807	0.00013484	-0.28547	0.164	0.116	1	0.614223	-0.312843	0.121	0.116	1	0.598313	Zfp644
808	0.37912	-0.301047	0.117	0.101	1	0.34251	-0.296947	0.101	0.101	1	0.597993	Ppp4r2
809	0.488832	-0.327791	0.109	0.095	1	0.431382	-0.269996	0.109	0.095	1	0.597787	Tbl1xr1
810	6.00526e-05	-0.285738	0.181	0.125	0.594581	0.936702	-0.31074	0.138	0.125	1	0.596478	Tnrc6c
811	0.000209579	-0.27931	0.214	0.153	1	0.396021	-0.314814	0.161	0.153	1	0.594124	Ppp4r3b
812	0.00102598	-0.341762	0.243	0.177	1	0.00816868	-0.252055	0.231	0.177	1	0.593817	Huwe1
813	1.12529e-07	-0.312119	0.314	0.203	0.00111415	0.0758473	-0.281446	0.259	0.203	1	0.593565	Canx
814	6.51513e-05	-0.289277	0.207	0.145	0.645063	0.610664	-0.30358	0.155	0.145	1	0.592856	Ppp4r3a
815	4.96089e-12	-0.277184	0.381	0.231	4.91178e-08	0.0302023	-0.315331	0.305	0.231	1	0.592515	Cyfip2
816	9.45609e-07	-0.25607	0.234	0.156	0.00936248	0.31753	-0.33644	0.165	0.156	1	0.592511	Eif3b
817	0.0272374	-0.329377	0.139	0.108	1	0.0036712	-0.262082	0.145	0.108	1	0.591458	Phf21a
818	0.036654	-0.276668	0.131	0.104	1	0.0139404	-0.313396	0.092	0.104	1	0.590064	Exoc5
819	2.76642e-10	-0.252601	0.315	0.199	2.73903e-06	0.535027	-0.336547	0.236	0.199	1	0.589149	Sla
820	0.00230016	-0.333821	0.228	0.168	1	0.0509694	-0.255178	0.211	0.168	1	0.588999	Cbl
821	0.00486347	-0.274293	0.147	0.111	1	0.112453	-0.313347	0.106	0.111	1	0.587641	Dlst
822	1.97538e-06	-0.33688	0.346	0.228	0.0195583	2.05947e-05	-0.250605	0.331	0.228	0.203908	0.587485	Tnrc6b
823	0.787527	-0.330319	0.129	0.115	1	0.444853	-0.25645	0.132	0.115	1	0.586769	Naa15
824	0.356308	-0.290123	0.122	0.104	1	0.0803918	-0.295923	0.098	0.104	1	0.586046	Ccnk
825	0.815309	-0.315376	0.109	0.102	1	0.985611	-0.270638	0.11	0.102	1	0.586013	Hbs1l
826	0.000892977	-0.290421	0.181	0.132	1	0.971123	-0.29542	0.144	0.132	1	0.585842	Rapgef1
827	7.15904e-07	-0.305402	0.233	0.154	0.00708817	0.0391393	-0.279514	0.195	0.154	1	0.584915	Nfatc1
828	0.00741163	-0.308253	0.157	0.119	1	0.0393909	-0.276087	0.151	0.119	1	0.58434	Rbm22
829	1.12101e-07	-0.30974	0.28	0.184	0.00110991	0.00148721	-0.270517	0.249	0.184	1	0.580257	Traf1
830	0.0311166	-0.294109	0.137	0.107	1	0.770117	-0.286025	0.113	0.107	1	0.580134	Fxr1
831	1.92729e-11	-0.29194	0.33	0.201	1.90821e-07	0.00460769	-0.286937	0.271	0.201	1	0.578878	Kif5b
832	0.00314014	-0.311522	0.174	0.129	1	0.0185936	-0.266765	0.167	0.129	1	0.578286	Usp3
833	2.92643e-10	-0.267132	0.258	0.16	2.89746e-06	0.14043	-0.310671	0.197	0.16	1	0.577803	Yeats4
834	2.89656e-05	-0.262175	0.191	0.132	0.286789	0.507412	-0.312724	0.139	0.132	1	0.574899	Tmem248
835	1.20094e-07	-0.255435	0.206	0.133	0.00118905	0.741102	-0.319163	0.151	0.133	1	0.574597	Luc7l
836	0.000144526	-0.294685	0.179	0.126	1	0.141873	-0.279184	0.154	0.126	1	0.57387	Akap8
837	0.327671	-0.298267	0.123	0.106	1	0.830016	-0.273169	0.112	0.106	1	0.571437	Mcm6
838	1.06168e-12	-0.273874	0.413	0.247	1.05117e-08	0.0116589	-0.297131	0.335	0.247	1	0.571005	Puf60
839	6.26317e-09	-0.284781	0.475	0.298	6.20116e-05	0.0334636	-0.285769	0.402	0.298	1	0.57055	Ncor1
840	0.00273475	-0.265229	0.144	0.106	1	0.0781191	-0.305147	0.1	0.106	1	0.570375	Ss18
841	3.55445e-06	-0.252356	0.186	0.125	0.0351927	0.172879	-0.317541	0.124	0.125	1	0.569897	Clk3
842	1.44082e-09	-0.259758	0.277	0.174	1.42655e-05	0.483124	-0.308456	0.206	0.174	1	0.568214	Ppp2r1a
843	4.96009e-09	-0.260839	0.215	0.135	4.91098e-05	0.100784	-0.305589	0.167	0.135	1	0.566429	Csnk1g2
844	3.38533e-05	-0.295191	0.214	0.149	0.335181	0.0273114	-0.27057	0.19	0.149	1	0.565761	Sbno1
845	0.0263005	-0.302907	0.168	0.13	1	0.239537	-0.262214	0.156	0.13	1	0.565121	Atp6v1e1
846	1.58881e-09	-0.304623	0.293	0.184	1.57308e-05	0.000356078	-0.259982	0.255	0.184	1	0.564605	Cebpz
847	5.35253e-08	-0.293622	0.226	0.145	0.000529954	0.00237737	-0.269112	0.195	0.145	1	0.562734	Pik3r5
848	0.0331501	-0.28055	0.127	0.1	1	0.754392	-0.282127	0.105	0.1	1	0.562677	Ube2q1
849	0.0798432	-0.302242	0.149	0.121	1	0.129941	-0.258723	0.146	0.121	1	0.560966	Gtpbp4
850	3.18174e-09	-0.252551	0.193	0.121	3.15024e-05	0.265329	-0.307204	0.142	0.121	1	0.559755	Rbm7
851	1.19926e-11	-0.277927	0.313	0.191	1.18739e-07	0.00310822	-0.280478	0.257	0.191	1	0.558405	Cd164
852	0.000684864	-0.262986	0.168	0.122	1	0.529903	-0.294856	0.127	0.122	1	0.557842	Ssr1
853	2.60322e-15	-0.26064	0.448	0.26	2.57745e-11	0.00951632	-0.296756	0.354	0.26	1	0.557395	Tecpr1
854	0.000344569	-0.266868	0.147	0.104	1	0.38663	-0.289981	0.106	0.104	1	0.556849	Kif1b
855	4.27648e-09	-0.25371	0.213	0.134	4.23414e-05	0.253886	-0.302656	0.16	0.134	1	0.556366	Tomm34
856	1.5054e-11	-0.28613	0.3	0.181	1.4905e-07	0.000155948	-0.269886	0.256	0.181	1	0.556016	Rasgrp1
857	3.01453e-10	-0.261806	0.219	0.133	2.98468e-06	0.0969005	-0.291108	0.165	0.133	1	0.552915	Herc4
858	6.9159e-14	-0.268689	0.304	0.177	6.84743e-10	0.000180647	-0.283677	0.251	0.177	1	0.552366	Pitpnc1
859	2.16672e-07	-0.269881	0.189	0.123	0.00214527	0.139577	-0.281708	0.148	0.123	1	0.55159	Pfkp
860	5.0731e-09	-0.269761	0.277	0.176	5.02288e-05	0.00170681	-0.27802	0.24	0.176	1	0.547782	Smg1
861	1.08639e-05	-0.280712	0.229	0.157	0.107563	0.0975043	-0.265563	0.194	0.157	1	0.546275	Git2
862	0.0180356	-0.281289	0.144	0.112	1	0.786527	-0.26311	0.124	0.112	1	0.544399	Glyr1
863	0.0362187	-0.273027	0.122	0.096	1	0.945275	-0.267583	0.104	0.096	1	0.54061	Nfrkb
864	3.6663e-10	-0.28161	0.295	0.184	3.63001e-06	4.42133e-05	-0.258027	0.263	0.184	0.437755	0.539637	Ankrd12
865	6.44501e-15	-0.278309	0.313	0.179	6.3812e-11	5.17218e-06	-0.260393	0.266	0.179	0.0512098	0.538702	Aff4
866	8.0741e-05	-0.279783	0.156	0.109	0.799417	0.0386541	-0.255736	0.136	0.109	1	0.535519	Nek7
867	5.28706e-05	-0.277045	0.158	0.109	0.523472	0.118451	-0.258134	0.132	0.109	1	0.535179	Setd1b
868	6.44892e-05	-0.273208	0.173	0.121	0.638507	0.778641	-0.258934	0.133	0.121	1	0.532142	Glg1
869	1.27353e-06	-0.276226	0.235	0.157	0.0126092	0.0132149	-0.253462	0.205	0.157	1	0.529688	Dync1h1
870	0.296144	-0.271529	0.111	0.095	1	0.690096	-0.256901	0.105	0.095	1	0.52843	Aftph
871	7.095e-15	-0.258208	0.401	0.234	7.02476e-11	0.000280963	-0.269303	0.331	0.234	1	0.527511	Phf20l1
872	0.00397817	-0.276244	0.15	0.113	1	0.161935	-0.250101	0.134	0.113	1	0.526345	Psmd2
873	0.01254	-0.272533	0.699	0.451	1	0.648757	-0.253754	0.625	0.451	1	0.526287	Son
874	0.0258429	-0.268275	0.126	0.098	1	0.949652	-0.256195	0.105	0.098	1	0.52447	Tmem222
875	0.000565729	-0.255305	0.134	0.096	1	0.53115	-0.262358	0.108	0.096	1	0.517663	Sec22b
876	0.000242771	-0.253944	0.133	0.094	1	0.520856	-0.262234	0.106	0.094	1	0.516178	Cops2
