# Supplementary material for: The T Cell Receptor Immune Repertoire Protects the Liver From Reconsitution
Source: Front Immunol. 2020 Dec 18;11:584979. doi: 10.3389/fimmu.2020.584979 (PMC7775400; doi:10.3389/fimmu.2020.584979)
Supplement: Supplementary file 7 [file Table_6.xlsx]

## Sheet: Cluster marker
	p_val	avg_logFC	pct.1	pct.2	p_val_adj	cluster	gene
Rplp0	0	0.579278	1	1	0	0	Rplp0
Rpl14	0	0.521753	0.999	0.995	0	0	Rpl14
Rps4x	0	0.481547	1	1	0	0	Rps4x
Rpl8	0	0.452231	1	0.999	0	0	Rpl8
Eef1a1	0	0.398785	1	1	0	0	Eef1a1
Rps16	2.70102e-305	0.401395	1	1	2.64916e-301	0	Rps16
Rpl9-ps6	2.26539e-290	0.462173	1	0.999	2.22189e-286	0	Rpl9-ps6
Rps24	2.41371e-286	0.371437	1	1	2.36736e-282	0	Rps24
Rpl19	2.6709e-286	0.38694	1	1	2.61962e-282	0	Rpl19
Rps2	1.85913e-283	0.45894	1	1	1.82343e-279	0	Rps2
Rps5	5.37183e-283	0.40318	1	1	5.26869e-279	0	Rps5
Ccl5	5.62632e-275	-2.96213	0.176	0.725	5.51829e-271	0	Ccl5
Rpl13	6.70132e-275	0.389817	1	1	6.57265e-271	0	Rpl13
Rps3	3.25553e-271	0.395631	1	1	3.19302e-267	0	Rps3
Rps7	6.7614e-265	0.391826	1	1	6.63158e-261	0	Rps7
Rps19	1.31226e-243	0.432383	0.999	1	1.28707e-239	0	Rps19
Rps3a1	1.30382e-237	0.341585	1	1	1.27879e-233	0	Rps3a1
Rpl3	2.31218e-227	0.396481	1	0.997	2.26779e-223	0	Rpl3
Rps8	5.869e-226	0.368308	1	1	5.75631e-222	0	Rps8
Rpl28	5.95559e-223	0.408352	1	0.999	5.84124e-219	0	Rpl28
Rpl18a	3.57107e-221	0.320082	1	1	3.50251e-217	0	Rpl18a
Rpl15	8.83973e-218	0.404338	1	0.995	8.67001e-214	0	Rpl15
Uba52	2.96037e-211	0.31911	1	1	2.90353e-207	0	Uba52
Rps20	5.78053e-205	0.421523	1	1	5.66955e-201	0	Rps20
Rpl6	3.5905e-203	0.327155	1	1	3.52156e-199	0	Rpl6
Eef2	3.2992e-195	0.434679	0.993	0.961	3.23586e-191	0	Eef2
Rpl35	7.17241e-193	0.361894	1	0.999	7.0347e-189	0	Rpl35
Rpsa	9.74577e-190	0.288707	1	1	9.55866e-186	0	Rpsa
S100a6	2.22772e-183	-1.30939	0.058	0.507	2.18495e-179	0	S100a6
Rpl26	2.29181e-183	0.334906	1	0.999	2.24781e-179	0	Rpl26
Nkg7	6.78842e-181	-1.13073	0.265	0.688	6.65809e-177	0	Nkg7
Rps10	1.9529e-180	0.297776	1	1	1.9154e-176	0	Rps10
Igfbp4	3.30094e-176	0.655739	0.519	0.166	3.23756e-172	0	Igfbp4
Rpl18	3.45477e-176	0.302547	1	1	3.38844e-172	0	Rpl18
Tmsb4x	1.70085e-175	-0.528385	1	1	1.66819e-171	0	Tmsb4x
Rpl12	4.07555e-171	0.359437	1	0.996	3.9973e-167	0	Rpl12
Gm10260	7.61818e-162	0.395206	0.681	0.285	7.47191e-158	0	Gm10260
AW112010	5.00971e-161	-0.870562	0.535	0.816	4.91352e-157	0	AW112010
Rpl10a	4.73525e-156	0.311235	0.999	0.997	4.64433e-152	0	Rpl10a
Gm8797	1.23587e-154	0.336333	0.625	0.236	1.21214e-150	0	Gm8797
Dusp10	4.46479e-154	0.434874	0.684	0.305	4.37907e-150	0	Dusp10
Eef1b2	3.84813e-152	0.363102	0.996	0.98	3.77425e-148	0	Eef1b2
Actb	7.03163e-152	-0.622656	0.963	0.989	6.89662e-148	0	Actb
Npc2	4.22978e-151	0.453549	0.915	0.691	4.14857e-147	0	Npc2
Rpl7	1.70801e-150	0.303476	0.999	0.997	1.67522e-146	0	Rpl7
Rpl32	3.94589e-145	0.272873	1	1	3.87013e-141	0	Rpl32
Rpl36a	2.64567e-143	0.321413	0.999	0.996	2.59488e-139	0	Rpl36a
Rpl10-ps3	1.59828e-142	0.358539	0.998	0.985	1.56759e-138	0	Rpl10-ps3
Rpl11	1.64318e-142	0.255957	1	1	1.61163e-138	0	Rpl11
H2-K1	4.63525e-139	-0.479611	0.966	0.985	4.54625e-135	0	H2-K1
Rflnb	1.45735e-137	0.358836	0.543	0.211	1.42936e-133	0	Rflnb
Ccr7	1.66433e-135	0.393538	0.821	0.399	1.63237e-131	0	Ccr7
Lef1	1.75451e-135	0.385748	0.689	0.325	1.72082e-131	0	Lef1
Rgs10	1.94479e-129	0.368988	0.641	0.297	1.90745e-125	0	Rgs10
Hspa8	2.32195e-127	0.352876	0.993	0.954	2.27737e-123	0	Hspa8
Rpl4	2.04898e-125	0.329273	0.994	0.963	2.00964e-121	0	Rpl4
Rgcc	3.26698e-120	0.411406	0.604	0.278	3.20425e-116	0	Rgcc
Ahnak	2.03933e-103	-0.542802	0.138	0.447	2.00017e-99	0	Ahnak
Frat2	3.6898e-98	0.278913	0.5	0.222	3.61896e-94	0	Frat2
Cd52	2.4719e-97	-0.646603	0.906	0.971	2.42444e-93	0	Cd52
Sell	3.89015e-93	0.257251	0.523	0.231	3.81545e-89	0	Sell
Bhlhe40	4.33463e-93	-0.513668	0.049	0.334	4.25141e-89	0	Bhlhe40
Thy1	1.74066e-92	-0.505328	0.32	0.581	1.70724e-88	0	Thy1
Actn1	4.49803e-91	0.256175	0.481	0.208	4.41167e-87	0	Actn1
Klf2	9.98261e-87	0.365572	0.964	0.834	9.79094e-83	0	Klf2
S100a4	2.7494e-82	-0.537612	0.011	0.258	2.69661e-78	0	S100a4
Il2rb	4.80445e-82	-0.479438	0.161	0.432	4.7122e-78	0	Il2rb
Cxcr6	2.62563e-75	-0.352196	0.015	0.247	2.57522e-71	0	Cxcr6
mt-Nd3	4.82787e-72	-0.392259	0.171	0.414	4.73518e-68	0	mt-Nd3
Hcst	1.6053e-68	-0.390622	0.756	0.886	1.57448e-64	0	Hcst
Ptprc	4.48591e-68	-0.342799	0.687	0.827	4.39979e-64	0	Ptprc
Pnrc1	2.16945e-67	0.261717	0.966	0.895	2.1278e-63	0	Pnrc1
Id2	2.68003e-67	-0.520602	0.243	0.473	2.62857e-63	0	Id2
mt-Co1	3.75872e-67	-0.357815	1	1	3.68655e-63	0	mt-Co1
Sh3bgrl3	1.05679e-65	-0.434098	0.763	0.869	1.0365e-61	0	Sh3bgrl3
Malat1	1.4018e-65	-0.442151	0.962	0.98	1.37489e-61	0	Malat1
Xist	4.59247e-65	0.283379	0.346	0.146	4.5043e-61	0	Xist
Gzmb	5.39728e-64	-0.626164	0.024	0.23	5.29365e-60	0	Gzmb
Rgs1	1.35246e-63	-0.703226	0.245	0.453	1.32649e-59	0	Rgs1
Eif3h	1.66704e-63	0.256561	0.875	0.665	1.63503e-59	0	Eif3h
Lgals1	4.25773e-62	-0.743149	0.266	0.471	4.17599e-58	0	Lgals1
Ifng	1.06045e-61	-0.374048	0.026	0.23	1.04009e-57	0	Ifng
Ccl4	1.13013e-59	-1.05853	0.051	0.255	1.10844e-55	0	Ccl4
Itgal	1.01195e-57	-0.326193	0.19	0.408	9.9252e-54	0	Itgal
S100a11	1.57248e-56	-0.494002	0.312	0.495	1.54229e-52	0	S100a11
S100a10	6.71454e-56	-0.506072	0.668	0.786	6.58563e-52	0	S100a10
Limd2	4.97244e-55	0.251509	0.886	0.759	4.87697e-51	0	Limd2
Itgb1	2.81572e-54	-0.352249	0.088	0.292	2.76166e-50	0	Itgb1
Laptm5	7.07823e-52	-0.314926	0.763	0.837	6.94233e-48	0	Laptm5
Actg1	6.11681e-51	-0.363118	0.92	0.954	5.99937e-47	0	Actg1
Prr13	1.96466e-50	-0.329931	0.199	0.399	1.92693e-46	0	Prr13
Dusp2	2.9498e-50	-0.499166	0.419	0.588	2.89316e-46	0	Dusp2
Rora	3.10153e-49	-0.298653	0.039	0.215	3.04198e-45	0	Rora
Ms4a4b	1.8046e-48	-0.413818	0.506	0.636	1.76995e-44	0	Ms4a4b
Pfn1	2.92502e-48	-0.420807	0.947	0.975	2.86886e-44	0	Pfn1
Rpl41	1.2595e-47	-0.294882	0.992	0.992	1.23532e-43	0	Rpl41
Tnfaip3	3.22387e-46	-0.366858	0.783	0.859	3.16197e-42	0	Tnfaip3
Trbv1	2.64436e-45	0.398211	0.227	0.091	2.59359e-41	0	Trbv1
H2-Q7	3.07356e-45	-0.290338	0.725	0.832	3.01455e-41	0	H2-Q7
Xcl1	1.92027e-43	-0.341878	0.023	0.175	1.8834e-39	0	Xcl1
Jun	2.21334e-43	0.286013	0.766	0.582	2.17084e-39	0	Jun
Myl6	1.11977e-42	-0.278724	0.869	0.938	1.09827e-38	0	Myl6
Rac2	1.30142e-42	-0.304223	0.881	0.94	1.27644e-38	0	Rac2
Cyba	5.39796e-41	-0.357226	0.591	0.674	5.29432e-37	0	Cyba
Gimap6	3.26483e-39	0.263696	0.873	0.804	3.20214e-35	0	Gimap6
Zfp36l2	1.11584e-35	-0.307969	0.728	0.82	1.09441e-31	0	Zfp36l2
Rpl29	9.10342e-33	-0.442248	0.811	0.885	8.92863e-29	0	Rpl29
Ctla2a	6.21097e-32	-0.268013	0.11	0.258	6.09172e-28	0	Ctla2a
Sh2d2a	1.04336e-30	-0.268485	0.26	0.408	1.02333e-26	0	Sh2d2a
Ly6e	1.12672e-30	-0.351068	0.624	0.687	1.10508e-26	0	Ly6e
Gzma	2.11438e-30	-1.11407	0.035	0.152	2.07379e-26	0	Gzma
Ccl3	2.70514e-30	-0.342965	0.006	0.107	2.6532e-26	0	Ccl3
Gm42418	1.30411e-29	-0.552725	1	1	1.27907e-25	0	Gm42418
Lcp1	1.64946e-29	-0.275086	0.393	0.509	1.61779e-25	0	Lcp1
Ptprcap	4.2019e-29	-0.293124	0.585	0.64	4.12123e-25	0	Ptprcap
Cd8a	5.07997e-28	-0.362509	0.223	0.36	4.98244e-24	0	Cd8a
H2-Q6	3.57973e-27	-0.271917	0.448	0.544	3.511e-23	0	H2-Q6
Klf6	1.39743e-24	-0.259128	0.691	0.763	1.3706e-20	0	Klf6
Cd3g	8.03293e-24	-0.261272	0.827	0.874	7.87869e-20	0	Cd3g
Ctla4	1.75483e-22	-0.265491	0.118	0.235	1.72114e-18	0	Ctla4
Klrd1	1.04372e-19	-0.266048	0.151	0.26	1.02368e-15	0	Klrd1
Egr1	3.13462e-17	-0.629119	0.219	0.306	3.07444e-13	0	Egr1
Cd8b1	6.71975e-17	-0.314475	0.334	0.429	6.59073e-13	0	Cd8b1
Fus	1.1626e-16	-0.27632	0.466	0.521	1.14027e-12	0	Fus
Ly6c2	7.76086e-16	-0.419168	0.164	0.258	7.61185e-12	0	Ly6c2
Cd7	3.94222e-14	-0.502811	0.233	0.311	3.86653e-10	0	Cd7
Rgs2	1.95087e-11	-0.275988	0.347	0.403	1.91341e-07	0	Rgs2
Nfkbia	2.1501e-07	-0.276509	0.661	0.655	0.00210881	0	Nfkbia
Rpl29.1	0	0.933953	0.99	0.855	0	1	Rpl29
Rpl35.1	0	0.562459	1	0.999	0	1	Rpl35
Rpl21	0	0.526276	1	0.999	0	1	Rpl21
Rps26	0	0.468628	1	0.999	0	1	Rps26
Rps15a	0	0.460465	1	1	0	1	Rps15a
Rps24.1	6.07983e-307	0.401409	1	1	5.9631e-303	1	Rps24
Rpl32.1	3.72325e-305	0.43823	1	1	3.65176e-301	1	Rpl32
Rps18	1.31125e-298	0.488555	1	0.999	1.28607e-294	1	Rps18
Rps10.1	2.35064e-287	0.395253	1	1	2.30551e-283	1	Rps10
Rps7.1	4.90639e-272	0.406734	1	1	4.81219e-268	1	Rps7
Rpl10a.1	1.63592e-259	0.449461	1	0.997	1.60451e-255	1	Rpl10a
Rpl10-ps3.1	2.16377e-244	0.526415	0.999	0.985	2.12223e-240	1	Rpl10-ps3
H2-D1	3.63524e-244	-0.634012	0.983	0.996	3.56544e-240	1	H2-D1
Rpl11.1	3.68048e-231	0.346717	1	1	3.60981e-227	1	Rpl11
Rpl23	5.05576e-226	0.324209	1	1	4.95869e-222	1	Rpl23
Dapl1	7.84001e-225	0.567522	0.456	0.104	7.68949e-221	1	Dapl1
Rps20.1	4.31614e-219	0.446381	1	1	4.23327e-215	1	Rps20
Rpl27a	4.93342e-215	0.314814	1	1	4.8387e-211	1	Rpl27a
Rps8.1	3.24519e-212	0.359006	1	1	3.18288e-208	1	Rps8
Rpl28.1	5.59272e-205	0.395271	1	0.999	5.48534e-201	1	Rpl28
Rps19.1	7.15721e-205	0.398586	1	1	7.01979e-201	1	Rps19
Rps16.1	8.9315e-203	0.326319	1	1	8.76002e-199	1	Rps16
Tmsb10	4.03899e-201	0.395236	1	1	3.96144e-197	1	Tmsb10
Rps27a	7.34855e-199	0.308338	1	1	7.20746e-195	1	Rps27a
Rpl36	1.85545e-198	0.295333	1	1	1.81983e-194	1	Rpl36
Rps13	1.11281e-196	0.298834	1	1	1.09144e-192	1	Rps13
Rpl15.1	6.74141e-196	0.395055	1	0.995	6.61197e-192	1	Rpl15
Rpl9-ps6.1	6.88803e-184	0.366258	1	0.999	6.75578e-180	1	Rpl9-ps6
Rps23	3.4629e-183	0.310249	1	1	3.39641e-179	1	Rps23
Rpl30	6.65924e-182	0.274262	1	1	6.53138e-178	1	Rpl30
Rpl39	1.98477e-181	0.281985	1	1	1.94667e-177	1	Rpl39
Rpl8.1	1.2791e-177	0.335866	1	0.999	1.25454e-173	1	Rpl8
Rpl13.1	5.14986e-175	0.30329	1	1	5.05098e-171	1	Rpl13
Rpl18.1	2.39306e-172	0.296162	1	1	2.34711e-168	1	Rpl18
Rpl35a	1.59486e-171	0.320962	1	0.994	1.56424e-167	1	Rpl35a
Rps11	2.43005e-169	0.322848	1	1	2.38339e-165	1	Rps11
Rpl19.1	6.78665e-169	0.304777	1	1	6.65635e-165	1	Rpl19
Rpl26.1	3.92962e-168	0.337807	1	0.999	3.85417e-164	1	Rpl26
Rpl36a.1	1.56278e-167	0.366785	1	0.996	1.53278e-163	1	Rpl36a
Rps4x.1	5.00207e-167	0.301895	1	1	4.90603e-163	1	Rps4x
Igfbp4.1	7.82865e-162	0.505472	0.528	0.168	7.67834e-158	1	Igfbp4
Uba52.1	8.74877e-159	0.282866	1	1	8.58079e-155	1	Uba52
Lef1.1	5.06827e-154	0.426471	0.713	0.325	4.97095e-150	1	Lef1
S100a6.1	1.59165e-148	-1.22085	0.093	0.496	1.56109e-144	1	S100a6
mt-Nd3.1	1.78906e-142	0.393734	0.702	0.324	1.75471e-138	1	mt-Nd3
Rps3a1.1	1.4345e-141	0.256074	1	1	1.40695e-137	1	Rps3a1
Rps5.1	9.63569e-141	0.278099	1	1	9.45068e-137	1	Rps5
Rps3.1	1.88967e-138	0.2766	1	1	1.85339e-134	1	Rps3
Rps2.1	3.37261e-138	0.29955	1	1	3.30786e-134	1	Rps2
Junb	4.86167e-137	-0.649145	0.913	0.969	4.76832e-133	1	Junb
Ccl5.1	2.06587e-135	-2.57715	0.382	0.686	2.0262e-131	1	Ccl5
Rpl17	1.83327e-133	0.311104	0.999	0.992	1.79807e-129	1	Rpl17
Gm8369	2.04326e-133	0.427396	0.712	0.368	2.00403e-129	1	Gm8369
Sell.1	2.82846e-132	0.351163	0.565	0.227	2.77416e-128	1	Sell
Rpl12.1	7.96869e-131	0.313471	1	0.996	7.81569e-127	1	Rpl12
Rplp1	3.6796e-130	0.254939	1	1	3.60895e-126	1	Rplp1
Ahnak.1	1.23587e-117	-0.571721	0.099	0.451	1.21214e-113	1	Ahnak
Rplp0.1	1.50911e-116	0.264003	1	1	1.48013e-112	1	Rplp0
Crip1	1.1424e-113	-0.658922	0.832	0.945	1.12046e-109	1	Crip1
Tcf7	6.78926e-113	0.376895	0.752	0.418	6.65891e-109	1	Tcf7
Rpl24	1.25923e-112	0.270025	1	0.999	1.23505e-108	1	Rpl24
Jund	2.46931e-112	-0.568872	0.891	0.95	2.4219e-108	1	Jund
Tnfaip3.1	2.47578e-110	-0.557864	0.706	0.872	2.42824e-106	1	Tnfaip3
Dusp1	1.39628e-107	-0.668948	0.564	0.787	1.36947e-103	1	Dusp1
Laptm5.1	3.28384e-104	-0.447557	0.666	0.853	3.22079e-100	1	Laptm5
Ccr7.1	6.76526e-101	0.298009	0.8	0.406	6.63537e-97	1	Ccr7
Bhlhe40.1	1.33491e-93	-0.52488	0.039	0.333	1.30928e-89	1	Bhlhe40
Nme2	1.84573e-92	0.333584	0.922	0.77	1.81029e-88	1	Nme2
Naca	8.98252e-92	0.276346	0.994	0.972	8.81006e-88	1	Naca
Ly6c1	5.97579e-91	0.274638	0.204	0.046	5.86105e-87	1	Ly6c1
AW112010.1	6.02573e-91	-0.702211	0.607	0.801	5.91004e-87	1	AW112010
Rgs1.1	6.4189e-91	-0.778747	0.175	0.462	6.29566e-87	1	Rgs1
Gm8797.1	7.30406e-91	-0.405787	0.043	0.336	7.16382e-87	1	Gm8797
Npm1	9.47639e-91	0.311175	0.96	0.888	9.29444e-87	1	Npm1
Nkg7.1	5.38245e-90	-0.928563	0.419	0.658	5.2791e-86	1	Nkg7
Actg1.1	7.98008e-90	-0.48083	0.872	0.962	7.82686e-86	1	Actg1
Nfkbia.1	4.54028e-89	-0.676945	0.459	0.689	4.45311e-85	1	Nfkbia
mt-Nd4l	4.02686e-86	0.269527	0.997	0.982	3.94955e-82	1	mt-Nd4l
Il2rb.1	2.22792e-83	-0.482361	0.145	0.432	2.18514e-79	1	Il2rb
Snrpf	3.54574e-81	0.300025	0.748	0.477	3.47766e-77	1	Snrpf
Actn1.1	3.72698e-81	0.253507	0.473	0.212	3.65542e-77	1	Actn1
Rps6	1.32579e-80	0.250302	0.999	0.987	1.30033e-76	1	Rps6
Klf3	5.96646e-79	0.291508	0.61	0.335	5.8519e-75	1	Klf3
Gm10260.1	1.45349e-75	-0.366556	0.116	0.383	1.42559e-71	1	Gm10260
Gm42418.1	3.61938e-75	-0.690743	1	1	3.54989e-71	1	Gm42418
Dusp2.1	1.58149e-73	-0.607071	0.367	0.595	1.55112e-69	1	Dusp2
S100a10.1	3.89209e-73	-0.565682	0.618	0.793	3.81737e-69	1	S100a10
Rps27rt	3.23844e-70	0.270706	0.643	0.386	3.17626e-66	1	Rps27rt
S100a4.1	5.31167e-68	-0.519669	0.027	0.253	5.20969e-64	1	S100a4
Tra2b	2.26553e-67	-0.424325	0.657	0.8	2.22203e-63	1	Tra2b
Fth1	8.62792e-67	-0.301629	0.975	0.996	8.46227e-63	1	Fth1
Il7r	1.2253e-66	0.308448	0.681	0.419	1.20178e-62	1	Il7r
Ifng.1	7.48418e-65	-0.395779	0.016	0.23	7.34049e-61	1	Ifng
Npc2.1	2.89332e-62	0.269885	0.876	0.7	2.83776e-58	1	Npc2
Ccl4.1	6.14676e-62	-1.09437	0.041	0.254	6.02875e-58	1	Ccl4
Limd2.1	1.08032e-61	0.268424	0.908	0.757	1.05958e-57	1	Limd2
Rgs10.1	2.6569e-60	0.257157	0.56	0.314	2.60589e-56	1	Rgs10
Gzmb.1	1.2317e-59	-0.648125	0.025	0.228	1.20805e-55	1	Gzmb
Cxcr6.1	4.47971e-59	-0.328712	0.035	0.242	4.3937e-55	1	Cxcr6
Xist.1	4.31602e-58	-0.35658	0.01	0.203	4.23316e-54	1	Xist
Lgals1.1	4.64228e-56	-0.71426	0.266	0.469	4.55315e-52	1	Lgals1
Zfp36l2.1	4.0843e-55	-0.388789	0.694	0.825	4.00588e-51	1	Zfp36l2
Smc4	6.91957e-54	0.256855	0.492	0.279	6.78671e-50	1	Smc4
Ier5	1.35196e-52	-0.378765	0.329	0.523	1.326e-48	1	Ier5
Hspa5	1.13294e-51	-0.382611	0.495	0.642	1.11119e-47	1	Hspa5
H3f3b	1.56594e-51	-0.328996	0.989	0.994	1.53587e-47	1	H3f3b
Rora.1	5.00325e-51	-0.309818	0.031	0.214	4.90719e-47	1	Rora
Ubc	5.89788e-51	-0.315361	0.706	0.813	5.78464e-47	1	Ubc
Pim1	4.61141e-50	-0.544614	0.336	0.515	4.52287e-46	1	Pim1
Prr13.1	7.58039e-50	-0.331304	0.191	0.398	7.43485e-46	1	Prr13
Sh2d2a.1	1.9607e-49	-0.3297	0.208	0.415	1.92305e-45	1	Sh2d2a
Itgb1.1	2.05315e-48	-0.331988	0.091	0.289	2.01373e-44	1	Itgb1
Gimap6.1	3.96015e-48	0.269666	0.901	0.8	3.88412e-44	1	Gimap6
Btg1	4.31123e-48	-0.344244	0.926	0.959	4.22846e-44	1	Btg1
Egr1.1	1.15839e-46	-0.735122	0.13	0.32	1.13615e-42	1	Egr1
Ctla2a.1	2.52591e-46	-0.314075	0.074	0.262	2.47741e-42	1	Ctla2a
Zfp36	3.08891e-46	-0.520178	0.489	0.647	3.0296e-42	1	Zfp36
Id2.1	1.23639e-45	-0.457976	0.283	0.464	1.21266e-41	1	Id2
Slc3a2	5.42842e-44	-0.308599	0.276	0.464	5.32419e-40	1	Slc3a2
Fosb	6.99579e-44	-0.421472	0.259	0.444	6.86147e-40	1	Fosb
Klf6.1	2.56208e-43	-0.381477	0.649	0.769	2.51289e-39	1	Klf6
Itgal.1	7.71004e-42	-0.28413	0.217	0.401	7.56201e-38	1	Itgal
Rbm39	1.50511e-41	-0.264292	0.854	0.921	1.47621e-37	1	Rbm39
Hspa8.1	2.61282e-41	-0.280513	0.92	0.966	2.56265e-37	1	Hspa8
Nr4a1	6.42034e-41	-0.412001	0.168	0.345	6.29707e-37	1	Nr4a1
H2-Q6.1	3.79061e-40	-0.299364	0.382	0.554	3.71783e-36	1	H2-Q6
Cd82	2.74724e-39	-0.261151	0.151	0.332	2.69449e-35	1	Cd82
Gnas	3.88061e-38	-0.268623	0.535	0.661	3.8061e-34	1	Gnas
Fos	1.40667e-36	-0.464661	0.665	0.771	1.37966e-32	1	Fos
Xcl1.1	1.50201e-36	-0.312719	0.03	0.172	1.47317e-32	1	Xcl1
Gadd45b	1.29066e-35	-0.28736	0.08	0.236	1.26588e-31	1	Gadd45b
Rcbtb2	4.66375e-35	-0.268431	0.058	0.204	4.57421e-31	1	Rcbtb2
Ier2	1.74707e-34	-0.372481	0.616	0.715	1.71352e-30	1	Ier2
Cd3e	2.90155e-34	-0.256285	0.882	0.934	2.84584e-30	1	Cd3e
Dusp5	1.00326e-33	-0.302136	0.336	0.486	9.83997e-30	1	Dusp5
Ctsd	3.39801e-33	-0.26687	0.252	0.412	3.33277e-29	1	Ctsd
Cebpb	1.95508e-32	-0.319173	0.285	0.437	1.91755e-28	1	Cebpb
Tmsb4x.1	5.6244e-32	-0.269265	1	1	5.51641e-28	1	Tmsb4x
Malat1.1	7.88783e-31	-0.33004	0.982	0.977	7.73638e-27	1	Malat1
Vim	3.69083e-30	-0.438268	0.407	0.524	3.61997e-26	1	Vim
Itgb2	1.96148e-29	-0.25112	0.245	0.396	1.92382e-25	1	Itgb2
H2-Q4	2.75177e-29	-0.253066	0.503	0.608	2.69893e-25	1	H2-Q4
Rgs2.1	3.49035e-29	-0.334208	0.266	0.416	3.42334e-25	1	Rgs2
Ly6a	4.55176e-29	-0.429658	0.362	0.495	4.46437e-25	1	Ly6a
Actb.1	6.35542e-26	-0.310924	0.986	0.985	6.23339e-22	1	Actb
Ccl3.1	7.45562e-25	-0.326707	0.012	0.105	7.31248e-21	1	Ccl3
Ctla4.1	6.75085e-22	-0.284543	0.119	0.234	6.62123e-18	1	Ctla4
AY036118	6.75225e-21	0.445939	0.845	0.851	6.6226e-17	1	AY036118
S100a11.1	1.93517e-19	-0.353948	0.402	0.478	1.89802e-15	1	S100a11
Gzma.1	2.12288e-19	-1.0495	0.056	0.147	2.08212e-15	1	Gzma
Cd69	4.81439e-19	-0.266851	0.58	0.66	4.72196e-15	1	Cd69
Lars2	1.55073e-18	-0.371556	0.783	0.885	1.52096e-14	1	Lars2
Cd7.1	7.63912e-16	-0.519854	0.221	0.313	7.49245e-12	1	Cd7
Fus.1	1.65906e-15	-0.264745	0.458	0.522	1.62721e-11	1	Fus
Clk1	4.843e-13	-0.255586	0.522	0.563	4.75002e-09	1	Clk1
Gm26917	9.21319e-09	-0.270737	0.431	0.476	9.0363e-05	1	Gm26917
Trbv1.1	2.073e-07	-0.341721	0.069	0.118	0.00203319	1	Trbv1
Ifi27l2a	1.65421e-05	-0.260879	0.727	0.75	0.162245	1	Ifi27l2a
Rps29	0	0.853568	1	1	0	2	Rps29
Rpl35a.1	0	0.808681	1	0.994	0	2	Rpl35a
Rpl37a	0	0.71758	1	1	0	2	Rpl37a
Rplp2	0	0.706783	1	1	0	2	Rplp2
Rps28	0	0.69598	1	1	0	2	Rps28
Rps21	0	0.52849	1	1	0	2	Rps21
Rpl38	0	0.509125	1	1	0	2	Rpl38
Ppia	0	-0.67826	0.994	0.999	0	2	Ppia
Rpl9-ps6.2	0	-0.821479	0.998	0.999	0	2	Rpl9-ps6
Pfn1.1	0	-1.0581	0.938	0.976	0	2	Pfn1
mt-Co1.1	5.60535e-308	0.636857	1	1	5.49772e-304	2	mt-Co1
Tmsb10.1	2.34993e-304	-0.727464	1	1	2.30481e-300	2	Tmsb10
Rpl5	2.73384e-301	0.652448	1	0.982	2.68135e-297	2	Rpl5
Rps27	2.32612e-284	0.436608	1	1	2.28146e-280	2	Rps27
Cd52.1	2.24681e-273	-1.04252	0.948	0.963	2.20367e-269	2	Cd52
Rpl41.1	2.38686e-272	0.646759	0.998	0.991	2.34104e-268	2	Rpl41
Uba52.2	1.04713e-260	-0.507511	1	1	1.02702e-256	2	Uba52
Rpl19.2	1.0238e-258	-0.530558	1	1	1.00414e-254	2	Rpl19
Rps12	7.6058e-246	0.53681	1	0.999	7.45976e-242	2	Rps12
mt-Co3	4.99334e-239	0.532928	1	0.998	4.89747e-235	2	mt-Co3
Rpl10-ps3.2	2.36526e-228	-0.682738	0.969	0.99	2.31985e-224	2	Rpl10-ps3
mt-Atp6	4.66073e-228	0.577621	0.999	0.976	4.57125e-224	2	mt-Atp6
Rpl23a	6.85472e-224	0.562195	0.998	0.934	6.72311e-220	2	Rpl23a
Gm11808	2.01606e-222	0.616664	0.542	0.162	1.97735e-218	2	Gm11808
Rplp1.1	2.32074e-212	0.413235	1	1	2.27618e-208	2	Rplp1
Rps3.2	1.12017e-207	-0.467322	1	1	1.09866e-203	2	Rps3
mt-Nd4	7.75241e-206	0.629761	0.988	0.867	7.60356e-202	2	mt-Nd4
Btg1.1	2.39452e-205	0.576833	0.997	0.948	2.34854e-201	2	Btg1
Psmb8	3.43222e-204	-0.658527	0.172	0.702	3.36632e-200	2	Psmb8
Sh3bgrl3.1	2.13562e-202	-0.74798	0.673	0.88	2.09461e-198	2	Sh3bgrl3
Ptprcap.1	8.10638e-202	-0.691129	0.181	0.7	7.95074e-198	2	Ptprcap
Tra2b.1	4.22349e-195	0.679743	0.94	0.756	4.1424e-191	2	Tra2b
Gm12355	3.72046e-193	0.2614	0.235	0.023	3.64902e-189	2	Gm12355
Rac2.1	6.18448e-190	-0.61908	0.86	0.942	6.06574e-186	2	Rac2
Clic1	3.46153e-189	-0.621396	0.104	0.621	3.39507e-185	2	Clic1
Gapdh	8.02364e-188	-0.622343	0.859	0.937	7.86959e-184	2	Gapdh
Elob	3.81173e-186	-0.565104	0.187	0.705	3.73854e-182	2	Elob
Cyba.1	6.67787e-186	-0.688128	0.248	0.724	6.54966e-182	2	Cyba
Clk1.1	7.40202e-186	0.672711	0.787	0.523	7.2599e-182	2	Clk1
Cd3g.1	1.71057e-183	-0.650463	0.705	0.891	1.67773e-179	2	Cd3g
Fus.2	7.08689e-180	0.655964	0.76	0.476	6.95082e-176	2	Fus
Rpl32.2	3.98543e-177	-0.430835	1	1	3.90891e-173	2	Rpl32
Rpl13a	1.00498e-175	-0.380827	1	1	9.85683e-172	2	Rpl13a
Cox8a	5.95535e-175	-0.543879	0.752	0.91	5.841e-171	2	Cox8a
Ccr7.2	3.2632e-172	0.792451	0.762	0.417	3.20055e-168	2	Ccr7
Selenow	6.59429e-170	-0.53819	0.355	0.794	6.46768e-166	2	Selenow
mt-Nd1	1.5799e-169	0.499148	0.998	0.969	1.54957e-165	2	mt-Nd1
Arhgdib	3.4025e-167	-0.569362	0.646	0.878	3.33717e-163	2	Arhgdib
Rpl9	6.71298e-167	0.472951	1	0.97	6.58409e-163	2	Rpl9
Rpl29.2	1.61426e-164	-0.902186	0.82	0.882	1.58327e-160	2	Rpl29
Fxyd5	5.30788e-164	-0.537428	0.744	0.911	5.20596e-160	2	Fxyd5
Satb1	3.18231e-160	0.674368	0.71	0.414	3.12121e-156	2	Satb1
Itm2b	2.31646e-159	-0.593541	0.623	0.858	2.27199e-155	2	Itm2b
S100a11.2	5.86639e-158	-0.7219	0.075	0.526	5.75376e-154	2	S100a11
Ndufa13	1.33768e-157	-0.518302	0.17	0.642	1.31199e-153	2	Ndufa13
mt-Nd2	1.05073e-154	0.504864	0.998	0.944	1.03056e-150	2	mt-Nd2
Atp5d	1.13039e-152	-0.488646	0.166	0.641	1.10869e-148	2	Atp5d
Rpl11.2	1.13093e-152	-0.358931	1	1	1.10922e-148	2	Rpl11
Edf1	8.29817e-152	-0.479236	0.103	0.555	8.13884e-148	2	Edf1
Cox6b1	1.03576e-151	-0.492052	0.157	0.625	1.01587e-147	2	Cox6b1
Jund.1	1.16065e-151	0.542446	0.997	0.933	1.13837e-147	2	Jund
Psme2	1.29049e-150	-0.50649	0.161	0.623	1.26571e-146	2	Psme2
Myl12b	3.48106e-150	-0.490203	0.593	0.871	3.41423e-146	2	Myl12b
Cox5b	1.68334e-148	-0.491736	0.186	0.655	1.65102e-144	2	Cox5b
Nfkbia.2	2.73167e-146	0.540973	0.897	0.62	2.67922e-142	2	Nfkbia
Rps15	3.08279e-146	0.439747	0.999	0.96	3.0236e-142	2	Rps15
Tspo	4.39391e-146	-0.50568	0.144	0.6	4.30954e-142	2	Tspo
Gstp1	6.74053e-146	-0.486488	0.13	0.579	6.61111e-142	2	Gstp1
S100a10.2	8.43476e-146	-0.779284	0.56	0.799	8.27281e-142	2	S100a10
Ost4	8.96699e-146	-0.481085	0.17	0.634	8.79482e-142	2	Ost4
Nme2.1	1.1673e-144	-0.540897	0.542	0.829	1.14489e-140	2	Nme2
Gng5	2.21339e-142	-0.482564	0.246	0.697	2.17089e-138	2	Gng5
Tmsb4x.2	3.25277e-142	-0.50007	0.999	1	3.19031e-138	2	Tmsb4x
Ppp1ca	4.53583e-142	-0.48943	0.14	0.589	4.44874e-138	2	Ppp1ca
Eno1	3.21533e-140	-0.502042	0.124	0.561	3.15359e-136	2	Eno1
Ly6a.1	4.96655e-138	-0.72927	0.104	0.532	4.87119e-134	2	Ly6a
Eef1d	2.76924e-137	-0.461133	0.267	0.724	2.71607e-133	2	Eef1d
Atp5j	3.91254e-137	-0.451618	0.177	0.634	3.83742e-133	2	Atp5j
Ypel3	1.05745e-136	-0.482843	0.147	0.583	1.03715e-132	2	Ypel3
Lsp1	6.74019e-136	-0.53433	0.177	0.622	6.61078e-132	2	Lsp1
Aldoa	7.40839e-136	-0.48433	0.101	0.52	7.26615e-132	2	Aldoa
Ppib	1.38111e-135	-0.463447	0.182	0.63	1.35459e-131	2	Ppib
Wdr89	2.09234e-135	0.272166	0.274	0.054	2.05217e-131	2	Wdr89
Ly6e.1	2.13112e-135	-0.64846	0.363	0.724	2.0902e-131	2	Ly6e
Myl12a	2.5615e-135	-0.485888	0.211	0.651	2.51232e-131	2	Myl12a
Naca.1	2.7634e-135	-0.428902	0.945	0.98	2.71034e-131	2	Naca
Rps27a.1	6.28878e-135	0.308239	1	1	6.16803e-131	2	Rps27a
Sept1	7.17411e-135	-0.482351	0.173	0.614	7.03637e-131	2	Sept1
Cnn2	7.19116e-135	-0.506273	0.188	0.627	7.05309e-131	2	Cnn2
Rpl10	1.08782e-134	0.468503	0.984	0.874	1.06694e-130	2	Rpl10
Lgals1.2	7.37544e-133	-0.930846	0.087	0.493	7.23383e-129	2	Lgals1
Serf2	9.44358e-133	-0.408481	0.955	0.976	9.26226e-129	2	Serf2
Ndufa3	1.27876e-131	-0.446571	0.192	0.635	1.25421e-127	2	Ndufa3
Gpx4	2.82161e-130	-0.442181	0.109	0.532	2.76744e-126	2	Gpx4
Fis1	4.16744e-129	-0.415122	0.114	0.533	4.08742e-125	2	Fis1
Ms4a4b.1	1.0764e-128	-0.621157	0.263	0.67	1.05574e-124	2	Ms4a4b
Emp3	9.73649e-128	-0.531396	0.093	0.495	9.54955e-124	2	Emp3
Gramd3	1.02001e-126	0.545067	0.609	0.331	1.00043e-122	2	Gramd3
Grcc10	7.47665e-126	-0.442602	0.275	0.705	7.3331e-122	2	Grcc10
Krtcap2	8.18116e-126	-0.443456	0.164	0.587	8.02408e-122	2	Krtcap2
Tagln2	3.50771e-123	-0.516663	0.15	0.56	3.44036e-119	2	Tagln2
Sumo2	1.80781e-121	-0.437747	0.189	0.605	1.7731e-117	2	Sumo2
Cd3e.1	2.45844e-121	-0.453919	0.88	0.934	2.41123e-117	2	Cd3e
Tnfaip3.2	2.29866e-120	0.460272	0.974	0.829	2.25452e-116	2	Tnfaip3
Atp5j2	2.59029e-120	-0.433288	0.335	0.745	2.54055e-116	2	Atp5j2
Gpr132	9.00935e-120	0.551929	0.644	0.385	8.83637e-116	2	Gpr132
Cd37	1.20029e-118	-0.41556	0.089	0.473	1.17724e-114	2	Cd37
Pfdn5	2.08813e-117	-0.406593	0.738	0.896	2.04803e-113	2	Pfdn5
Eif3h.1	2.29976e-117	-0.433133	0.349	0.748	2.25561e-113	2	Eif3h
Atp5c1	1.88416e-116	-0.405895	0.153	0.55	1.84799e-112	2	Atp5c1
Rpl18a.1	2.62758e-116	-0.293434	1	1	2.57713e-112	2	Rpl18a
H2-T23	5.57819e-116	-0.438073	0.165	0.573	5.47109e-112	2	H2-T23
Arpc1b	8.60022e-116	-0.452997	0.366	0.751	8.4351e-112	2	Arpc1b
Hint1	2.11634e-115	-0.431705	0.238	0.651	2.07571e-111	2	Hint1
Coro1a	2.30201e-115	-0.427988	0.869	0.934	2.25781e-111	2	Coro1a
Ndfip1	1.9404e-113	-0.426064	0.117	0.504	1.90315e-109	2	Ndfip1
Rpl14.1	5.09296e-113	-0.391312	0.995	0.996	4.99518e-109	2	Rpl14
Ndufa7	1.00235e-112	-0.394575	0.17	0.569	9.83101e-109	2	Ndufa7
Pim1.1	1.32849e-112	0.622285	0.697	0.458	1.30298e-108	2	Pim1
Gabarap	9.5554e-112	-0.394412	0.146	0.536	9.37193e-108	2	Gabarap
Trmt112	4.63136e-110	-0.383702	0.155	0.552	4.54244e-106	2	Trmt112
Oaz1	9.37539e-110	-0.37007	0.957	0.973	9.19538e-106	2	Oaz1
Il4ra	7.01353e-109	0.46304	0.494	0.222	6.87887e-105	2	Il4ra
mt-Nd4l.1	2.06643e-108	-0.382844	0.989	0.984	2.02676e-104	2	mt-Nd4l
Ptpn18	2.61788e-108	-0.389337	0.858	0.927	2.56761e-104	2	Ptpn18
Ccnl1	3.19636e-108	0.529674	0.674	0.458	3.13499e-104	2	Ccnl1
Nop10	1.06159e-107	-0.382209	0.155	0.546	1.04121e-103	2	Nop10
Rps10.2	1.23109e-107	-0.303035	1	1	1.20745e-103	2	Rps10
Tmem258	1.46587e-107	-0.370912	0.134	0.514	1.43772e-103	2	Tmem258
Psmb3	1.10336e-106	-0.373706	0.091	0.451	1.08217e-102	2	Psmb3
Ubb	4.52593e-106	-0.381693	0.992	0.995	4.43904e-102	2	Ubb
Psenen	9.02741e-106	-0.369077	0.096	0.455	8.85409e-102	2	Psenen
Ppp1r18	9.61222e-106	-0.4162	0.19	0.577	9.42767e-102	2	Ppp1r18
Psmb9	1.83881e-105	-0.38581	0.086	0.443	1.8035e-101	2	Psmb9
Gm10076	3.54355e-104	0.256187	1	1	3.47552e-100	2	Gm10076
Limd2.2	4.87422e-104	-0.440297	0.547	0.813	4.78064e-100	2	Limd2
Kdm6b	1.76576e-101	0.432451	0.495	0.228	1.73186e-97	2	Kdm6b
Gmfg	2.20504e-101	-0.406992	0.239	0.629	2.1627e-97	2	Gmfg
Sod1	3.08483e-101	0.455996	0.516	0.253	3.0256e-97	2	Sod1
H2afj	8.04579e-100	-0.398547	0.32	0.704	7.89131e-96	2	H2afj
Sap18	1.83254e-99	-0.35428	0.131	0.493	1.79735e-95	2	Sap18
Actr3	2.05009e-99	-0.402836	0.212	0.597	2.01073e-95	2	Actr3
Thy1.1	2.16041e-98	-0.489596	0.22	0.59	2.11893e-94	2	Thy1
Park7	2.26977e-98	-0.341264	0.101	0.45	2.22619e-94	2	Park7
Psme1	6.11767e-98	-0.396641	0.322	0.702	6.00021e-94	2	Psme1
Cd3d	6.60753e-98	-0.376961	0.861	0.92	6.48067e-94	2	Cd3d
Btg2	1.97222e-97	-0.522205	0.249	0.62	1.93435e-93	2	Btg2
Sri	1.267e-96	-0.3508	0.102	0.45	1.24268e-92	2	Sri
S100a13	1.43374e-96	-0.390757	0.13	0.478	1.40621e-92	2	S100a13
Gpsm3	1.535e-95	-0.347056	0.127	0.481	1.50553e-91	2	Gpsm3
Abracl	1.68672e-95	-0.383553	0.165	0.526	1.65433e-91	2	Abracl
Fkbp1a	9.67379e-94	-0.35632	0.101	0.44	9.48805e-90	2	Fkbp1a
Eif3f	7.43951e-92	-0.340545	0.811	0.911	7.29667e-88	2	Eif3f
Anp32a	8.4574e-92	-0.349721	0.152	0.506	8.29502e-88	2	Anp32a
Selplg	5.54814e-91	-0.393548	0.339	0.7	5.44161e-87	2	Selplg
AW112010.2	7.71688e-91	-0.779942	0.721	0.782	7.56872e-87	2	AW112010
Rps15a.1	9.13838e-91	-0.283196	1	1	8.96293e-87	2	Rps15a
Rps20.2	3.02335e-90	0.306183	1	1	2.9653e-86	2	Rps20
S100a6.2	7.8358e-90	-1.04589	0.176	0.479	7.68536e-86	2	S100a6
Atp5g2	1.95165e-89	-0.353523	0.553	0.822	1.91418e-85	2	Atp5g2
Atp5g3	2.39137e-89	-0.361637	0.373	0.737	2.34545e-85	2	Atp5g3
Ndufa4	5.40291e-89	-0.359449	0.314	0.691	5.29918e-85	2	Ndufa4
Lcp1.1	2.25639e-88	-0.411101	0.191	0.537	2.21307e-84	2	Lcp1
Ndufv3	2.89211e-88	-0.329288	0.154	0.497	2.83658e-84	2	Ndufv3
Irs2	3.1051e-88	0.355775	0.365	0.139	3.04549e-84	2	Irs2
Lamtor2	5.27893e-88	-0.312489	0.092	0.413	5.17757e-84	2	Lamtor2
Gm47283	1.47278e-87	0.492774	0.517	0.277	1.44451e-83	2	Gm47283
Atp6v0c	2.31842e-87	-0.31251	0.054	0.356	2.2739e-83	2	Atp6v0c
Cox7a2	1.01218e-86	-0.335737	0.26	0.627	9.92744e-83	2	Cox7a2
Itgb2.1	1.17557e-86	-0.389335	0.099	0.416	1.153e-82	2	Itgb2
Hmgb1	1.58109e-86	-0.345183	0.266	0.642	1.55073e-82	2	Hmgb1
Polr1d	1.94638e-86	-0.333886	0.215	0.583	1.90901e-82	2	Polr1d
Prr13.2	2.35887e-86	-0.41889	0.098	0.409	2.31358e-82	2	Prr13
D8Ertd738e	2.46756e-86	-0.334814	0.21	0.569	2.42018e-82	2	D8Ertd738e
Lck	3.24502e-86	-0.370054	0.396	0.742	3.18272e-82	2	Lck
Vps28	7.15429e-86	-0.322996	0.118	0.444	7.01693e-82	2	Vps28
Gabarapl2	1.65825e-85	-0.342191	0.157	0.493	1.62641e-81	2	Gabarapl2
Mif	2.36959e-85	-0.352622	0.218	0.576	2.3241e-81	2	Mif
Vim.1	1.34883e-84	-0.579547	0.223	0.55	1.32293e-80	2	Vim
Arpc3	1.73272e-84	-0.346286	0.258	0.625	1.69945e-80	2	Arpc3
Nedd8	2.09663e-84	-0.305167	0.12	0.446	2.05637e-80	2	Nedd8
Hcst.1	3.24843e-84	-0.456566	0.821	0.873	3.18606e-80	2	Hcst
Cox7b	4.20978e-84	-0.330461	0.202	0.55	4.12896e-80	2	Cox7b
Mrpl33	7.13132e-84	-0.32498	0.142	0.476	6.9944e-80	2	Mrpl33
Rpl18.2	1.14352e-83	-0.256347	1	1	1.12156e-79	2	Rpl18
Ddx5	2.01114e-83	0.346916	0.983	0.932	1.97252e-79	2	Ddx5
Tma7	3.17063e-83	-0.333445	0.319	0.691	3.10975e-79	2	Tma7
Rpl17.1	6.16829e-83	0.285007	1	0.992	6.04986e-79	2	Rpl17
Atp5h	6.98729e-83	-0.344955	0.592	0.839	6.85313e-79	2	Atp5h
Sec61g	1.05421e-82	-0.340733	0.392	0.749	1.03397e-78	2	Sec61g
Mrps21	3.06249e-82	-0.296515	0.094	0.403	3.00369e-78	2	Mrps21
Ucp2	9.01646e-82	-0.380091	0.227	0.573	8.84334e-78	2	Ucp2
Bloc1s1	9.10161e-82	-0.299577	0.069	0.368	8.92686e-78	2	Bloc1s1
Rpl26.2	1.10603e-81	-0.29035	0.997	0.999	1.08479e-77	2	Rpl26
Cox5a	1.73687e-81	-0.327082	0.211	0.563	1.70352e-77	2	Cox5a
Zc3hav1	3.18723e-81	0.446742	0.637	0.454	3.12604e-77	2	Zc3hav1
Clta	4.26749e-81	-0.324437	0.222	0.577	4.18556e-77	2	Clta
Cd2	7.78838e-81	-0.349058	0.152	0.473	7.63885e-77	2	Cd2
Rnf187	3.22158e-80	-0.308703	0.094	0.393	3.15973e-76	2	Rnf187
Ndufa1	3.536e-80	-0.307303	0.183	0.512	3.46811e-76	2	Ndufa1
Dad1	6.01811e-80	-0.320211	0.205	0.552	5.90256e-76	2	Dad1
Capzb	8.10968e-80	-0.346506	0.215	0.559	7.95397e-76	2	Capzb
Ube2i	9.39085e-80	-0.299919	0.119	0.431	9.21055e-76	2	Ube2i
2410015M20Rik	1.40013e-79	-0.291232	0.09	0.39	1.37325e-75	2	2410015M20Rik
Rps11.1	3.47804e-79	-0.267139	0.999	1	3.41126e-75	2	Rps11
Arl6ip1	7.45634e-79	-0.335436	0.176	0.505	7.31318e-75	2	Arl6ip1
Ybx1	4.64903e-78	-0.332444	0.299	0.652	4.55977e-74	2	Ybx1
Csnk2b	1.06693e-77	-0.292969	0.071	0.359	1.04644e-73	2	Csnk2b
Actb.2	6.20516e-77	-0.468873	0.994	0.984	6.08602e-73	2	Actb
Ndufb4	6.39292e-77	-0.277805	0.098	0.399	6.27018e-73	2	Ndufb4
Timm13	3.75345e-76	-0.281619	0.116	0.415	3.68138e-72	2	Timm13
Srp14	6.20086e-76	-0.289735	0.144	0.456	6.08181e-72	2	Srp14
Rpl36al	7.70452e-76	-0.283256	0.952	0.965	7.55659e-72	2	Rpl36al
Rpl15.2	8.88257e-76	-0.313628	0.997	0.996	8.71202e-72	2	Rpl15
Dynll1	1.01739e-75	-0.319681	0.149	0.457	9.97858e-72	2	Dynll1
Rabac1	1.23471e-75	-0.311425	0.229	0.567	1.21101e-71	2	Rabac1
Rps17	2.83972e-75	0.356686	0.943	0.849	2.7852e-71	2	Rps17
mt-Atp8	3.03781e-75	-0.269409	1	0.999	2.97948e-71	2	mt-Atp8
Rps5.2	5.33163e-75	-0.265917	1	1	5.22926e-71	2	Rps5
Chchd2	5.34555e-75	-0.321805	0.656	0.854	5.24291e-71	2	Chchd2
Selenof	8.8437e-75	-0.280381	0.109	0.404	8.6739e-71	2	Selenof
Rps25	1.00597e-74	0.320937	0.988	0.928	9.86654e-71	2	Rps25
Rpl24.1	1.34759e-74	-0.261066	0.998	0.999	1.32171e-70	2	Rpl24
Atox1	1.65684e-74	-0.294228	0.129	0.43	1.62502e-70	2	Atox1
Ostf1	2.4059e-74	-0.302506	0.142	0.449	2.35971e-70	2	Ostf1
Myl6.1	2.68484e-74	-0.34808	0.913	0.93	2.63329e-70	2	Myl6
Gnas.1	2.99832e-74	-0.342502	0.345	0.688	2.94075e-70	2	Gnas
Rpl28.2	1.44774e-73	-0.307634	1	0.999	1.41994e-69	2	Rpl28
Ldha	3.62078e-73	-0.335992	0.242	0.574	3.55126e-69	2	Ldha
Ssr4	4.20764e-73	-0.288589	0.126	0.422	4.12685e-69	2	Ssr4
Atp5e	2.53842e-72	-0.275772	0.948	0.968	2.48968e-68	2	Atp5e
Rbm39.1	3.61898e-72	0.329829	0.977	0.902	3.54949e-68	2	Rbm39
Ifi27	5.55003e-72	-0.299009	0.086	0.365	5.44347e-68	2	Ifi27
Gm8369.1	5.594e-72	-0.357363	0.156	0.456	5.48659e-68	2	Gm8369
Ms4a6b	6.11503e-72	-0.329867	0.247	0.584	5.99763e-68	2	Ms4a6b
Eif3k	6.28775e-72	-0.302989	0.339	0.69	6.16703e-68	2	Eif3k
Cfl1	1.63445e-71	-0.351131	0.918	0.932	1.60307e-67	2	Cfl1
Pabpc1	1.81383e-71	0.30974	0.989	0.919	1.779e-67	2	Pabpc1
Rnaset2b	2.06309e-71	-0.278685	0.091	0.372	2.02348e-67	2	Rnaset2b
Srgn	2.12843e-71	-0.372747	0.926	0.935	2.08756e-67	2	Srgn
H3f3b.1	4.54478e-71	-0.429321	0.998	0.992	4.45752e-67	2	H3f3b
Rbx1	1.0286e-70	-0.274894	0.089	0.368	1.00885e-66	2	Rbx1
Gimap4	1.08752e-70	-0.380452	0.231	0.542	1.06664e-66	2	Gimap4
Ccnd3	1.14361e-70	-0.318687	0.136	0.43	1.12166e-66	2	Ccnd3
Anxa6	1.83048e-70	-0.312579	0.128	0.417	1.79533e-66	2	Anxa6
Cox6c	2.18745e-70	-0.307006	0.535	0.813	2.14545e-66	2	Cox6c
Arl6ip5	3.34233e-70	-0.290272	0.171	0.476	3.27816e-66	2	Arl6ip5
Gimap7	4.08987e-70	-0.310265	0.04	0.295	4.01135e-66	2	Gimap7
Prelid1	4.75578e-70	-0.287161	0.157	0.46	4.66447e-66	2	Prelid1
Ubl5	1.68642e-69	-0.312147	0.334	0.678	1.65404e-65	2	Ubl5
Erh	2.18296e-69	-0.268491	0.136	0.428	2.14105e-65	2	Erh
Gm8797.2	5.73046e-69	-0.360066	0.065	0.329	5.62043e-65	2	Gm8797
Tbca	7.41761e-69	-0.27459	0.239	0.568	7.27519e-65	2	Tbca
Cd7.2	9.04291e-69	-0.696769	0.074	0.333	8.86929e-65	2	Cd7
Ccdc12	1.23701e-68	-0.269892	0.086	0.357	1.21326e-64	2	Ccdc12
Psmb1	3.0494e-68	-0.281068	0.205	0.522	2.99085e-64	2	Psmb1
Eif3i	6.12823e-68	-0.27925	0.17	0.469	6.01056e-64	2	Eif3i
Vamp8	1.50828e-67	-0.273136	0.099	0.373	1.47932e-63	2	Vamp8
Pdia3	1.79622e-67	-0.296624	0.132	0.419	1.76173e-63	2	Pdia3
Leprotl1	1.13436e-66	-0.272964	0.178	0.488	1.11259e-62	2	Leprotl1
Supt4a	1.44267e-66	-0.279607	0.164	0.455	1.41497e-62	2	Supt4a
Psma2	1.64385e-66	-0.265509	0.14	0.427	1.61229e-62	2	Psma2
Spcs2	1.73743e-66	-0.259728	0.075	0.338	1.70408e-62	2	Spcs2
Stk17b	5.67756e-66	0.369332	0.802	0.721	5.56855e-62	2	Stk17b
Dnajc15	7.34371e-66	-0.30819	0.123	0.396	7.20271e-62	2	Dnajc15
Reep5	1.52804e-65	-0.292765	0.133	0.416	1.4987e-61	2	Reep5
Pla2g16	1.58764e-65	-0.264138	0.069	0.325	1.55716e-61	2	Pla2g16
Hnrnpa0	2.57878e-65	0.36375	0.501	0.3	2.52926e-61	2	Hnrnpa0
Cycs	2.61434e-65	-0.272675	0.147	0.434	2.56415e-61	2	Cycs
Tecr	2.67921e-65	-0.253004	0.062	0.317	2.62776e-61	2	Tecr
Tln1	2.77922e-64	-0.283156	0.155	0.44	2.72586e-60	2	Tln1
Txn1	4.13375e-64	-0.28606	0.129	0.405	4.05438e-60	2	Txn1
Rnaseh2c	5.06606e-64	-0.251944	0.051	0.294	4.96879e-60	2	Rnaseh2c
Cd48	5.85965e-64	-0.290108	0.055	0.303	5.74714e-60	2	Cd48
Fos.1	6.06317e-64	-0.600846	0.662	0.77	5.94675e-60	2	Fos
Bin2	1.00774e-63	-0.277422	0.162	0.45	9.88394e-60	2	Bin2
Nt5c	1.01123e-63	-0.254248	0.089	0.347	9.91814e-60	2	Nt5c
H2afv	1.40502e-63	-0.266279	0.177	0.472	1.37805e-59	2	H2afv
Ndufb10	1.8566e-63	-0.252283	0.14	0.419	1.82095e-59	2	Ndufb10
Sec11c	2.09999e-63	-0.279877	0.124	0.393	2.05967e-59	2	Sec11c
Rtraf	2.13623e-63	-0.251754	0.135	0.413	2.09521e-59	2	Rtraf
Itgb7	2.40201e-63	-0.299963	0.188	0.483	2.35589e-59	2	Itgb7
Prdx5	4.41676e-63	-0.25309	0.073	0.324	4.33196e-59	2	Prdx5
Fkbp3	4.83827e-63	-0.25579	0.097	0.357	4.74537e-59	2	Fkbp3
Bax	6.99952e-63	-0.257186	0.103	0.366	6.86513e-59	2	Bax
Cd8b1.1	1.12195e-62	-0.589201	0.199	0.447	1.10041e-58	2	Cd8b1
Anapc11	1.32627e-62	-0.251359	0.08	0.331	1.3008e-58	2	Anapc11
Eef2.1	2.81631e-62	-0.289882	0.971	0.965	2.76224e-58	2	Eef2
Snrpd3	4.00325e-62	-0.255457	0.137	0.409	3.92639e-58	2	Snrpd3
Rgs1.2	6.60698e-62	-0.62209	0.191	0.456	6.48012e-58	2	Rgs1
Dpm3	1.23957e-61	-0.253331	0.169	0.451	1.21577e-57	2	Dpm3
Ltb	1.55574e-61	-0.379874	0.512	0.749	1.52587e-57	2	Ltb
Snrpf.1	2.69236e-61	-0.27928	0.249	0.555	2.64066e-57	2	Snrpf
Atp6v1f	3.013e-61	-0.26673	0.235	0.537	2.95515e-57	2	Atp6v1f
Rpl21.1	3.92326e-61	-0.26737	1	0.999	3.84793e-57	2	Rpl21
Rnaset2a	6.61595e-61	-0.255615	0.133	0.407	6.48892e-57	2	Rnaset2a
Arpc5	7.46808e-61	-0.270766	0.177	0.462	7.3247e-57	2	Arpc5
Scand1	7.94303e-61	-0.26757	0.26	0.57	7.79053e-57	2	Scand1
Klf13	1.08081e-60	0.413041	0.553	0.387	1.06006e-56	2	Klf13
Srsf5	1.46822e-60	0.304188	0.868	0.783	1.44003e-56	2	Srsf5
Rps2.2	2.65899e-60	-0.267381	1	1	2.60794e-56	2	Rps2
Ndufb7	3.54469e-60	-0.252105	0.164	0.447	3.47663e-56	2	Ndufb7
Aes	1.06271e-59	-0.254064	0.218	0.514	1.04231e-55	2	Aes
Pycard	1.54616e-59	-0.259443	0.051	0.284	1.51647e-55	2	Pycard
Uqcr10	1.60017e-59	-0.253171	0.214	0.513	1.56945e-55	2	Uqcr10
Uqcrb	1.62993e-59	-0.256994	0.167	0.442	1.59864e-55	2	Uqcrb
Pomp	2.25443e-59	-0.254174	0.143	0.408	2.21114e-55	2	Pomp
Ftl1	3.89261e-59	-0.301618	0.941	0.948	3.81787e-55	2	Ftl1
Cd247	6.15395e-59	-0.260181	0.169	0.446	6.03579e-55	2	Cd247
Atp6v0e	7.36875e-59	-0.257679	0.19	0.474	7.22727e-55	2	Atp6v0e
Atp5f1	3.91152e-58	-0.253052	0.185	0.466	3.83641e-54	2	Atp5f1
Smap1	4.92505e-58	-0.251569	0.114	0.369	4.83049e-54	2	Smap1
Elmsan1	7.49794e-58	0.287866	0.348	0.161	7.35397e-54	2	Elmsan1
Snu13	2.57593e-57	-0.254095	0.222	0.512	2.52647e-53	2	Snu13
Klk8	4.12797e-57	-0.255237	0.133	0.389	4.04871e-53	2	Klk8
Epsti1	6.06567e-57	-0.299192	0.157	0.419	5.94921e-53	2	Epsti1
Rpl10a.2	9.81034e-57	-0.256294	1	0.997	9.62198e-53	2	Rpl10a
Smad7	1.11414e-56	0.393045	0.566	0.403	1.09275e-52	2	Smad7
Lat	5.06388e-56	-0.298671	0.687	0.848	4.96666e-52	2	Lat
Cd47	1.46671e-55	-0.268044	0.269	0.561	1.43855e-51	2	Cd47
Rhoa	2.37971e-55	-0.251111	0.262	0.562	2.33402e-51	2	Rhoa
Rplp0.2	5.8917e-55	-0.2842	1	1	5.77858e-51	2	Rplp0
Ctsw	7.51917e-55	-0.311185	0.153	0.409	7.3748e-51	2	Ctsw
Usmg5	7.6617e-55	-0.253582	0.369	0.689	7.51459e-51	2	Usmg5
Cxcr6.2	7.76588e-55	-0.325007	0.032	0.239	7.61677e-51	2	Cxcr6
Il2rg	1.34467e-54	-0.281847	0.327	0.635	1.31885e-50	2	Il2rg
Skap1	5.0742e-54	-0.264701	0.257	0.55	4.97677e-50	2	Skap1
Foxp1	5.67506e-54	0.368528	0.555	0.395	5.5661e-50	2	Foxp1
Hmgn2	3.19306e-53	-0.261815	0.167	0.424	3.13175e-49	2	Hmgn2
Calm1	4.92089e-53	-0.320859	0.728	0.84	4.82641e-49	2	Calm1
H2-T22	8.59712e-53	-0.264815	0.216	0.485	8.43206e-49	2	H2-T22
Nkg7.2	1.15581e-51	-0.935473	0.59	0.629	1.13362e-47	2	Nkg7
Tob2	6.61689e-51	0.35886	0.387	0.211	6.48985e-47	2	Tob2
Hnrnpa3	1.4076e-50	-0.26674	0.361	0.665	1.38057e-46	2	Hnrnpa3
Zfp36.1	3.53811e-50	-0.514069	0.437	0.653	3.47017e-46	2	Zfp36
Hnrnpa2b1	6.44726e-50	-0.264192	0.437	0.729	6.32347e-46	2	Hnrnpa2b1
Gimap3	3.24807e-48	-0.273522	0.321	0.607	3.18571e-44	2	Gimap3
Gzmb.2	4.11614e-48	-0.591003	0.035	0.224	4.03711e-44	2	Gzmb
Id2.2	4.37147e-48	-0.396224	0.224	0.471	4.28754e-44	2	Id2
Hnrnph1	1.45504e-47	0.353886	0.527	0.379	1.4271e-43	2	Hnrnph1
Klrd1.1	4.23156e-47	-0.352248	0.07	0.27	4.15031e-43	2	Klrd1
Ccl4.2	9.91829e-47	-1.03056	0.06	0.249	9.72786e-43	2	Ccl4
Cd82.1	1.19903e-46	-0.25294	0.114	0.335	1.176e-42	2	Cd82
Zyx	2.7191e-46	-0.264475	0.115	0.327	2.66689e-42	2	Zyx
S100a4.2	6.52423e-45	-0.432713	0.056	0.246	6.39896e-41	2	S100a4
Cd28	7.00762e-45	0.353289	0.639	0.536	6.87307e-41	2	Cd28
Vps37b	1.00866e-44	0.319022	0.734	0.644	9.89289e-41	2	Vps37b
Per1	8.27258e-44	0.310663	0.465	0.305	8.11375e-40	2	Per1
Arpc2	2.29387e-42	-0.255462	0.551	0.779	2.24982e-38	2	Arpc2
Ifng.2	5.75992e-42	-0.339112	0.047	0.222	5.64933e-38	2	Ifng
Ythdc1	1.85239e-41	0.333035	0.545	0.419	1.81683e-37	2	Ythdc1
Xist.2	4.37405e-41	-0.296258	0.03	0.198	4.29007e-37	2	Xist
Eif4g2	6.72765e-41	0.326074	0.603	0.515	6.59848e-37	2	Eif4g2
Shisa5	6.44844e-40	-0.254218	0.902	0.914	6.32463e-36	2	Shisa5
H2-Q7.1	1.94548e-38	-0.2916	0.728	0.83	1.90813e-34	2	H2-Q7
Hspa5.1	9.23175e-38	0.309501	0.669	0.614	9.0545e-34	2	Hspa5
Itgb1.2	1.18001e-37	-0.293251	0.101	0.285	1.15736e-33	2	Itgb1
Ncl	3.1909e-37	0.292086	0.603	0.519	3.12963e-33	2	Ncl
Mef2d	4.97421e-37	0.273735	0.371	0.222	4.8787e-33	2	Mef2d
Cebpb.1	1.92075e-36	-0.280619	0.229	0.443	1.88388e-32	2	Cebpb
Ddx3x	1.69956e-35	0.29593	0.475	0.34	1.66693e-31	2	Ddx3x
Ptp4a2	6.0638e-35	0.310223	0.538	0.433	5.94737e-31	2	Ptp4a2
Xcl1.2	1.13219e-34	-0.324451	0.028	0.17	1.11045e-30	2	Xcl1
Cd8a.1	4.04356e-33	-0.387605	0.188	0.363	3.96592e-29	2	Cd8a
Taf1d	3.65636e-32	0.282645	0.451	0.322	3.58615e-28	2	Taf1d
AY036118.1	1.31788e-31	-0.639248	0.908	0.842	1.29258e-27	2	AY036118
Gm26917.1	1.35104e-31	0.357007	0.562	0.456	1.3251e-27	2	Gm26917
mt-Nd3.2	1.51754e-30	0.260243	0.492	0.36	1.4884e-26	2	mt-Nd3
Bhlhe40.2	2.38101e-30	-0.301383	0.143	0.314	2.33529e-26	2	Bhlhe40
Dusp10.1	4.22969e-30	0.304602	0.473	0.345	4.14848e-26	2	Dusp10
Hnrnpdl	9.91081e-30	0.26874	0.56	0.468	9.72052e-26	2	Hnrnpdl
Ahnak.2	2.29058e-29	-0.271648	0.241	0.425	2.2466e-25	2	Ahnak
Arid5a	3.71132e-29	0.253847	0.403	0.274	3.64006e-25	2	Arid5a
Ly6c2.1	7.07328e-28	-0.520631	0.119	0.262	6.93747e-24	2	Ly6c2
Ifi27l2a.1	3.55045e-27	-0.511114	0.717	0.751	3.48229e-23	2	Ifi27l2a
Mcl1	1.05933e-25	0.280593	0.518	0.44	1.03899e-21	2	Mcl1
Eif4a2	3.98626e-25	0.26053	0.577	0.524	3.90972e-21	2	Eif4a2
Nxf1	1.65672e-24	0.253363	0.435	0.329	1.62491e-20	2	Nxf1
Gzma.2	2.51825e-24	-1.03353	0.038	0.149	2.4699e-20	2	Gzma
Ccl3.2	1.3104e-23	-0.328257	0.01	0.104	1.28524e-19	2	Ccl3
Jun.1	2.94181e-21	-0.315164	0.482	0.629	2.88533e-17	2	Jun
Atf4	1.15525e-20	0.254807	0.519	0.449	1.13307e-16	2	Atf4
Trbv1.2	3.83798e-20	-0.548579	0.031	0.123	3.76429e-16	2	Trbv1
Lars2.1	1.36413e-18	-0.547165	0.911	0.865	1.33794e-14	2	Lars2
Ier2.1	1.21988e-15	-0.253892	0.603	0.716	1.19646e-11	2	Ier2
Egr1.2	1.69772e-13	-0.551533	0.209	0.306	1.66512e-09	2	Egr1
Dusp1.1	8.26667e-07	-0.281086	0.754	0.755	0.00810795	2	Dusp1
Crip1.1	1.23349e-06	-0.267528	0.982	0.921	0.0120981	2	Crip1
Ccl5.2	5.03542e-05	-2.22919	0.874	0.608	0.493874	2	Ccl5
Ccl5.3	0	1.71727	0.998	0.601	0	3	Ccl5
Ly6c2.2	0	1.37708	0.791	0.18	0	3	Ly6c2
Cx3cr1	0	0.370663	0.302	0.007	0	3	Cx3cr1
S1pr5	0	0.274959	0.23	0.002	0	3	S1pr5
Lgals1.3	3.36618e-291	1.24512	0.876	0.39	3.30155e-287	3	Lgals1
Zeb2	2.23454e-285	0.382454	0.333	0.028	2.19164e-281	3	Zeb2
Gzma.3	2.34999e-282	1.784	0.512	0.091	2.30487e-278	3	Gzma
Nkg7.3	2.24433e-264	0.93536	0.983	0.583	2.20124e-260	3	Nkg7
Klrg1	1.69395e-239	0.349549	0.3	0.027	1.66142e-235	3	Klrg1
Klrd1.2	3.82617e-238	0.61509	0.683	0.193	3.7527e-234	3	Klrd1
Klrc1	7.14861e-227	0.437252	0.401	0.061	7.01135e-223	3	Klrc1
Cd8b1.2	4.88407e-212	0.839649	0.829	0.367	4.79029e-208	3	Cd8b1
Klrk1	3.45599e-180	0.370844	0.377	0.067	3.38964e-176	3	Klrk1
Emp3.1	3.34501e-174	0.636946	0.806	0.401	3.28079e-170	3	Emp3
Ccl4.3	2.88455e-154	0.734392	0.586	0.182	2.82917e-150	3	Ccl4
Cd52.2	2.84248e-153	0.576885	0.998	0.957	2.7879e-149	3	Cd52
Ifitm10	3.62436e-153	0.400095	0.503	0.145	3.55477e-149	3	Ifitm10
Hcst.2	5.87585e-152	0.521101	0.971	0.854	5.76303e-148	3	Hcst
Ms4a4b.2	2.28359e-147	0.596748	0.899	0.584	2.23974e-143	3	Ms4a4b
Pfn1.2	2.72529e-137	0.517446	1	0.968	2.67296e-133	3	Pfn1
Il18rap	2.69138e-135	0.263456	0.284	0.051	2.6397e-131	3	Il18rap
Ahnak.3	1.30792e-134	0.560637	0.761	0.359	1.28281e-130	3	Ahnak
S100a6.3	6.80547e-130	0.676406	0.799	0.398	6.67481e-126	3	S100a6
S100a10.3	3.16514e-129	0.561639	0.922	0.75	3.10437e-125	3	S100a10
Actb.3	1.41417e-122	0.535853	1	0.984	1.38702e-118	3	Actb
Thy1.2	4.58588e-122	0.517893	0.846	0.506	4.49783e-118	3	Thy1
Rps29.1	5.10663e-121	-0.521011	1	1	5.00858e-117	3	Rps29
Cd48.1	9.24893e-119	0.431928	0.584	0.234	9.07135e-115	3	Cd48
H2afz	2.19162e-116	0.520321	0.887	0.658	2.14954e-112	3	H2afz
Rps28.1	2.27581e-116	-0.454217	1	1	2.23211e-112	3	Rps28
Cyba.2	2.02313e-111	0.525717	0.879	0.637	1.98429e-107	3	Cyba
Tmsb4x.3	2.73691e-109	0.381387	1	1	2.68436e-105	3	Tmsb4x
Dnajc15.1	2.343e-107	0.408895	0.672	0.325	2.29801e-103	3	Dnajc15
Lgals3	3.17205e-107	0.391996	0.328	0.085	3.11115e-103	3	Lgals3
Zyx.1	3.97792e-107	0.400113	0.604	0.264	3.90155e-103	3	Zyx
Eef1a1.1	1.09866e-102	-0.29787	1	1	1.07756e-98	3	Eef1a1
Arhgdib.1	2.47351e-102	0.415853	0.945	0.837	2.42601e-98	3	Arhgdib
Rpl29.3	7.16525e-98	0.518397	0.957	0.865	7.02768e-94	3	Rpl29
Rps20.3	1.35492e-95	-0.449427	1	1	1.3289e-91	3	Rps20
Rplp1.2	6.41208e-94	-0.339763	1	1	6.28896e-90	3	Rplp1
Rps27.1	1.85737e-89	-0.296704	1	1	1.82171e-85	3	Rps27
Jund.2	2.24439e-88	-0.567894	0.864	0.95	2.2013e-84	3	Jund
Rpl37a.1	4.1248e-88	-0.362485	1	1	4.04561e-84	3	Rpl37a
Itgb1.3	8.78724e-88	0.407143	0.538	0.229	8.61853e-84	3	Itgb1
Ccr7.3	9.13216e-88	-0.732874	0.144	0.499	8.95683e-84	3	Ccr7
Rps21.1	3.62371e-87	-0.306054	1	1	3.55413e-83	3	Rps21
Gzmb.3	9.43103e-87	0.324499	0.469	0.168	9.24995e-83	3	Gzmb
Rpsa.1	4.65765e-85	-0.287869	1	1	4.56822e-81	3	Rpsa
Cox8a.1	3.33245e-83	0.324578	0.963	0.881	3.26847e-79	3	Cox8a
Hopx	4.11772e-82	0.278421	0.458	0.179	4.03866e-78	3	Hopx
Atp5h.1	1.53779e-80	0.365491	0.927	0.792	1.50827e-76	3	Atp5h
Ostf1.1	1.57245e-80	0.35829	0.677	0.378	1.54226e-76	3	Ostf1
Ifi27l2a.2	9.87393e-79	-0.590401	0.441	0.782	9.68435e-75	3	Ifi27l2a
Krtcap2.1	6.91228e-78	0.387188	0.78	0.503	6.77957e-74	3	Krtcap2
S100a13.1	2.14311e-77	0.368564	0.694	0.402	2.10196e-73	3	S100a13
Gzmk	9.0483e-77	0.285279	0.303	0.09	8.87457e-73	3	Gzmk
Sh3bgrl3.2	8.34068e-74	0.352735	0.955	0.841	8.18053e-70	3	Sh3bgrl3
Rac2.2	8.25365e-72	0.312173	0.974	0.926	8.09518e-68	3	Rac2
H2-Q7.2	3.0592e-70	0.356758	0.92	0.804	3.00046e-66	3	H2-Q7
S100a4.3	9.66366e-69	0.358898	0.462	0.193	9.47811e-65	3	S100a4
Rps19.2	1.62237e-68	-0.342747	1	1	1.59122e-64	3	Rps19
Rpl38.1	1.43923e-67	-0.267866	1	1	1.41159e-63	3	Rpl38
Itgb2.2	2.27374e-66	0.364364	0.621	0.346	2.23009e-62	3	Itgb2
Selplg.1	2.65042e-66	0.358221	0.831	0.632	2.59953e-62	3	Selplg
Rpl5.1	1.00123e-65	-0.364669	0.977	0.985	9.82003e-62	3	Rpl5
Rpl12.2	6.43577e-65	-0.314235	0.986	0.998	6.31221e-61	3	Rpl12
Myl6.2	1.83717e-64	0.313638	0.973	0.922	1.8019e-60	3	Myl6
Ctsw.1	6.37049e-64	0.308187	0.643	0.344	6.24817e-60	3	Ctsw
Ppia.1	2.00442e-63	0.255129	1	0.998	1.96593e-59	3	Ppia
Epsti1.1	1.64488e-62	0.310002	0.637	0.356	1.6133e-58	3	Epsti1
Pycard.1	1.98627e-61	0.319536	0.47	0.228	1.94813e-57	3	Pycard
Dusp10.2	2.6096e-61	-0.430066	0.115	0.391	2.5595e-57	3	Dusp10
Itga4	1.89467e-60	0.337788	0.584	0.317	1.85829e-56	3	Itga4
Rpl36a.2	8.70576e-60	-0.303795	0.99	0.998	8.53861e-56	3	Rpl36a
Vim.2	1.29449e-59	0.408429	0.73	0.481	1.26963e-55	3	Vim
Btg1.2	1.82458e-59	-0.425424	0.914	0.959	1.78955e-55	3	Btg1
Sgk1	7.22384e-59	0.280166	0.323	0.124	7.08514e-55	3	Sgk1
Cfl1.1	5.81302e-58	0.303409	0.952	0.928	5.70141e-54	3	Cfl1
Rps8.2	1.69158e-56	-0.263918	1	1	1.6591e-52	3	Rps8
Prr13.3	4.27899e-55	0.28241	0.608	0.341	4.19683e-51	3	Prr13
Cox5b.1	1.346e-53	0.318375	0.777	0.572	1.32015e-49	3	Cox5b
Satb1.1	4.67675e-53	-0.421079	0.223	0.479	4.58696e-49	3	Satb1
Calm1.1	6.81444e-53	0.314637	0.891	0.818	6.6836e-49	3	Calm1
Reep5.1	1.50041e-52	0.333722	0.593	0.354	1.4716e-48	3	Reep5
Fxyd5.1	1.66635e-52	0.296767	0.937	0.884	1.63436e-48	3	Fxyd5
Anxa6.1	1.83384e-52	0.276575	0.607	0.353	1.79863e-48	3	Anxa6
Id2.3	5.25105e-52	0.351514	0.665	0.412	5.15023e-48	3	Id2
Abracl.1	2.36983e-51	0.329972	0.687	0.454	2.32432e-47	3	Abracl
Crip1.2	4.77225e-51	0.307214	0.985	0.923	4.68062e-47	3	Crip1
Ctsd.1	9.09196e-51	0.315907	0.602	0.364	8.91739e-47	3	Ctsd
Gm10260.2	1.9666e-49	-0.32915	0.122	0.371	1.92884e-45	3	Gm10260
Igfbp4.2	2.15129e-49	-0.521209	0.022	0.242	2.10999e-45	3	Igfbp4
Actg1.2	2.33717e-48	0.34367	0.977	0.946	2.2923e-44	3	Actg1
Clk1.2	3.3681e-48	-0.423377	0.361	0.58	3.30343e-44	3	Clk1
S100a11.3	1.00363e-47	0.28098	0.698	0.44	9.84365e-44	3	S100a11
Rflnb.1	4.28098e-47	-0.299547	0.058	0.285	4.19879e-43	3	Rflnb
Tra2b.2	1.14541e-46	-0.402543	0.623	0.798	1.12342e-42	3	Tra2b
Jun.2	4.08376e-45	-0.481978	0.404	0.633	4.00535e-41	3	Jun
Rps15.1	5.11878e-45	-0.280352	0.919	0.97	5.0205e-41	3	Rps15
Bin2.1	9.97404e-45	0.266422	0.614	0.389	9.78254e-41	3	Bin2
Myl12a.1	3.28628e-44	0.29215	0.77	0.574	3.22318e-40	3	Myl12a
Clic1.1	1.05972e-42	0.274615	0.747	0.531	1.03938e-38	3	Clic1
Ifng.3	1.44772e-42	0.251307	0.382	0.178	1.41992e-38	3	Ifng
Rgs10.2	8.49e-42	-0.294173	0.143	0.372	8.32699e-38	3	Rgs10
Rplp2.1	7.44533e-41	-0.268975	1	1	7.30238e-37	3	Rplp2
Vps37b.1	2.08037e-40	-0.328024	0.485	0.675	2.04043e-36	3	Vps37b
Fos.2	2.1926e-40	-0.442807	0.568	0.778	2.15051e-36	3	Fos
Lsp1.1	3.82039e-39	0.278404	0.738	0.544	3.74704e-35	3	Lsp1
Ppp1r15a	6.53624e-39	-0.335198	0.483	0.676	6.41074e-35	3	Ppp1r15a
Eno1.1	8.04965e-39	0.275593	0.681	0.484	7.8951e-35	3	Eno1
Ltb.1	3.13031e-38	-0.322328	0.535	0.739	3.07021e-34	3	Ltb
Sumo2.1	3.79146e-38	0.252861	0.723	0.531	3.71867e-34	3	Sumo2
Junb.1	3.08724e-37	-0.395383	0.925	0.965	3.02796e-33	3	Junb
Dusp1.2	3.09789e-35	-0.440331	0.604	0.772	3.03841e-31	3	Dusp1
Arpc1b.1	5.53596e-35	0.274018	0.814	0.687	5.42967e-31	3	Arpc1b
mt-Co3.1	7.7381e-35	-0.268535	0.999	0.998	7.58953e-31	3	mt-Co3
Gpr132.1	2.00628e-33	-0.329809	0.253	0.438	1.96775e-29	3	Gpr132
Cd28.1	2.82674e-33	-0.321578	0.382	0.569	2.77247e-29	3	Cd28
Tagln2.1	4.46648e-33	0.262548	0.682	0.486	4.38072e-29	3	Tagln2
Tsc22d3	2.71954e-32	-0.29156	0.637	0.81	2.66732e-28	3	Tsc22d3
Npc2.2	5.7319e-32	-0.287859	0.603	0.739	5.62185e-28	3	Npc2
Rpl23a.1	4.30464e-30	-0.254486	0.885	0.949	4.22199e-26	3	Rpl23a
Gm26917.2	1.32295e-28	-0.413428	0.317	0.487	1.29755e-24	3	Gm26917
Tcf7.1	5.7104e-28	-0.267489	0.311	0.483	5.60076e-24	3	Tcf7
Rap1b	6.6238e-28	0.26295	0.701	0.565	6.49662e-24	3	Rap1b
Ccnl1.1	2.68974e-27	-0.305789	0.342	0.503	2.63809e-23	3	Ccnl1
Zc3hav1.1	3.75676e-27	-0.284464	0.331	0.495	3.68463e-23	3	Zc3hav1
Emb	5.22785e-25	-0.271839	0.382	0.548	5.12747e-21	3	Emb
Fus.3	4.28038e-24	-0.304051	0.375	0.529	4.1982e-20	3	Fus
Lef1.2	9.03372e-23	-0.276425	0.253	0.395	8.86028e-19	3	Lef1
Hspa5.2	6.71374e-22	-0.258985	0.502	0.635	6.58484e-18	3	Hspa5
Rgs2.2	2.93127e-20	-0.328349	0.275	0.409	2.87499e-16	3	Rgs2
Gm42418.2	1.11787e-16	-0.271525	1	1	1.09641e-12	3	Gm42418
Pim1.2	5.11989e-14	-0.383363	0.41	0.499	5.02159e-10	3	Pim1
Trbv1.3	7.99922e-11	-0.403841	0.046	0.119	7.84563e-07	3	Trbv1
Nr4a1.1	7.27803e-10	-0.252708	0.244	0.329	7.13829e-06	3	Nr4a1
Egr1.3	5.26416e-09	-0.407306	0.218	0.302	5.16309e-05	3	Egr1
Xcl1.3	0	0.85668	0.642	0.106	0	4	Xcl1
Il4	0	0.338348	0.295	0.005	0	4	Il4
Egr1.4	1.28111e-280	1.5501	0.776	0.248	1.25651e-276	4	Egr1
Socs2	2.09133e-275	0.372073	0.336	0.026	2.05118e-271	4	Socs2
Rcbtb2.1	1.91459e-260	0.757169	0.63	0.141	1.87783e-256	4	Rcbtb2
Cxcr6.3	1.37363e-256	0.63113	0.701	0.167	1.34725e-252	4	Cxcr6
Klrb1a	1.62191e-256	0.269668	0.227	0.009	1.59077e-252	4	Klrb1a
Tcrg-C4	8.30397e-240	0.276049	0.237	0.012	8.14453e-236	4	Tcrg-C4
Ckb	3.56538e-229	0.38083	0.354	0.04	3.49692e-225	4	Ckb
Il2rb.2	3.61527e-226	0.825996	0.849	0.349	3.54586e-222	4	Il2rb
Tcrg-C1	2.03766e-210	0.327164	0.243	0.017	1.99853e-206	4	Tcrg-C1
Ly6e.2	5.23172e-205	0.765813	0.961	0.651	5.13127e-201	4	Ly6e
Cd40lg	2.14875e-185	0.433779	0.461	0.092	2.1075e-181	4	Cd40lg
Plac8	2.41757e-183	0.649359	0.739	0.256	2.37116e-179	4	Plac8
Podnl1	1.18328e-152	0.293029	0.302	0.045	1.16056e-148	4	Podnl1
Gimap4.1	6.17299e-151	0.603102	0.877	0.467	6.05447e-147	4	Gimap4
Dok2	7.95122e-151	0.425631	0.55	0.16	7.79855e-147	4	Dok2
Art2b	2.56235e-149	0.307555	0.322	0.053	2.51315e-145	4	Art2b
Rps29.2	2.68397e-148	-0.626231	1	1	2.63243e-144	4	Rps29
Lyst	4.55121e-145	0.410629	0.461	0.118	4.46383e-141	4	Lyst
Sh3bgrl3.3	2.14633e-142	0.598651	0.98	0.841	2.10512e-138	4	Sh3bgrl3
Btg2.1	5.09755e-142	0.776885	0.88	0.543	4.99968e-138	4	Btg2
Ifng.4	2.05808e-137	0.510582	0.557	0.166	2.01856e-133	4	Ifng
AW112010.3	5.79113e-134	0.577108	0.979	0.755	5.67994e-130	4	AW112010
Rac2.3	6.95671e-133	0.493832	0.987	0.926	6.82314e-129	4	Rac2
Trgv2	2.03569e-130	0.252914	0.231	0.03	1.9966e-126	4	Trgv2
Ly6a.2	1.17771e-128	0.650834	0.855	0.441	1.15509e-124	4	Ly6a
Rps26.1	1.84578e-128	-0.488621	1	0.999	1.81034e-124	4	Rps26
Cxcr3	6.99739e-127	0.333747	0.429	0.108	6.86304e-123	4	Cxcr3
Rpl35a.2	1.25643e-126	-0.622529	0.98	0.996	1.23231e-122	4	Rpl35a
Trbv13-2	1.3799e-125	0.688082	0.322	0.066	1.35341e-121	4	Trbv13-2
Dusp1.3	2.65557e-123	0.835791	0.925	0.739	2.60459e-119	4	Dusp1
Pfn1.3	2.99281e-120	0.483092	0.999	0.968	2.93535e-116	4	Pfn1
Ccr7.4	5.74055e-119	-0.961417	0.03	0.503	5.63033e-115	4	Ccr7
Xist.3	1.83949e-114	0.466142	0.487	0.147	1.80417e-110	4	Xist
Fth1.1	5.21674e-113	0.4096	1	0.993	5.11658e-109	4	Fth1
Gm19585	4.03199e-110	0.383659	0.481	0.157	3.95458e-106	4	Gm19585
Ccr2	1.58474e-107	0.265828	0.348	0.081	1.55432e-103	4	Ccr2
Rps20.4	2.44622e-105	-0.567707	1	1	2.39925e-101	4	Rps20
Cd52.3	3.18448e-104	0.455532	0.994	0.958	3.12334e-100	4	Cd52
Gimap3.1	3.71416e-103	0.470223	0.873	0.541	3.64285e-99	4	Gimap3
Fos.3	2.65871e-102	0.841261	0.891	0.743	2.60767e-98	4	Fos
Rpl35.2	4.88411e-102	-0.482848	0.994	0.999	4.79033e-98	4	Rpl35
Id2.4	3.19125e-100	0.5124	0.803	0.404	3.12998e-96	4	Id2
Rps8.3	2.1424e-99	-0.398386	1	1	2.10126e-95	4	Rps8
Tmsb4x.4	1.82048e-98	0.328189	1	1	1.78552e-94	4	Tmsb4x
Ctsw.2	3.75878e-98	0.425339	0.722	0.343	3.68661e-94	4	Ctsw
Rgs1.4	7.23593e-97	0.566813	0.779	0.388	7.097e-93	4	Rgs1
H3f3b.2	1.07774e-95	0.612463	0.993	0.993	1.05705e-91	4	H3f3b
Cd82.2	1.92514e-95	0.4418	0.625	0.277	1.88818e-91	4	Cd82
Cyba.3	1.61329e-93	0.436117	0.908	0.639	1.58231e-89	4	Cyba
Rhob	5.26445e-92	0.435835	0.482	0.177	5.16337e-88	4	Rhob
Crip1.3	2.09905e-90	-0.710423	0.779	0.943	2.05875e-86	4	Crip1
Rps28.2	2.24266e-90	-0.432053	0.999	1	2.19961e-86	4	Rps28
Gm10076.1	3.16537e-90	-0.281843	1	1	3.10459e-86	4	Gm10076
Bcl2a1b	9.81523e-89	0.346449	0.489	0.179	9.62678e-85	4	Bcl2a1b
Gimap7.1	1.31266e-86	0.348405	0.566	0.233	1.28746e-82	4	Gimap7
Tmsb10.2	1.19492e-85	0.326987	1	1	1.17198e-81	4	Tmsb10
Rps27.2	9.14947e-85	-0.297943	1	1	8.9738e-81	4	Rps27
Fosb.1	1.15939e-84	0.60425	0.702	0.391	1.13713e-80	4	Fosb
Ccnd3.1	1.82684e-84	0.403898	0.685	0.365	1.79177e-80	4	Ccnd3
Hopx.1	3.86859e-83	0.332772	0.482	0.182	3.79431e-79	4	Hopx
Ptprcap.2	1.37135e-82	0.393472	0.883	0.608	1.34502e-78	4	Ptprcap
Itgb2.3	1.36416e-81	0.363278	0.691	0.345	1.33797e-77	4	Itgb2
Myl6.3	1.39396e-81	0.348958	0.993	0.922	1.36719e-77	4	Myl6
Cd8b1.3	2.47505e-81	-0.769866	0.066	0.447	2.42753e-77	4	Cd8b1
Zfp36.2	5.0346e-80	0.759824	0.836	0.605	4.93793e-76	4	Zfp36
Ltb.2	9.77982e-79	0.530042	0.886	0.703	9.59204e-75	4	Ltb
Cebpb.2	1.34263e-77	0.506874	0.694	0.389	1.31685e-73	4	Cebpb
Malat1.2	1.64225e-77	0.482231	0.996	0.976	1.61072e-73	4	Malat1
Lcp1.2	4.04169e-77	0.382671	0.79	0.464	3.96409e-73	4	Lcp1
Skap1.1	5.67437e-77	0.383939	0.788	0.486	5.56543e-73	4	Skap1
Dusp2.2	1.08801e-76	0.659675	0.801	0.54	1.06712e-72	4	Dusp2
Ppp1r12a	7.21395e-76	0.37612	0.66	0.344	7.07545e-72	4	Ppp1r12a
Ccnd2	8.90341e-76	0.388896	0.698	0.386	8.73246e-72	4	Ccnd2
Cd3g.2	1.14281e-75	0.349169	0.963	0.858	1.12087e-71	4	Cd3g
Nkg7.4	5.09359e-75	0.301425	0.913	0.597	4.9958e-71	4	Nkg7
Rplp1.3	8.03484e-75	-0.332431	1	1	7.88057e-71	4	Rplp1
Gabarapl2.1	2.06085e-73	0.342487	0.733	0.423	2.02128e-69	4	Gabarapl2
Itgal.2	2.2392e-73	0.340185	0.677	0.347	2.19621e-69	4	Itgal
Cd226	1.58688e-72	0.260538	0.354	0.115	1.55642e-68	4	Cd226
Rpl30.1	1.65457e-72	-0.264953	1	1	1.62281e-68	4	Rpl30
Rps3a1.2	6.15401e-72	-0.2871	1	1	6.03585e-68	4	Rps3a1
H2-D1.1	2.95068e-70	0.324746	1	0.993	2.89402e-66	4	H2-D1
Higd1a	3.34059e-70	0.304829	0.559	0.26	3.27645e-66	4	Higd1a
Dusp5.1	8.44571e-70	0.460028	0.732	0.44	8.28355e-66	4	Dusp5
Psmb8.1	1.49514e-69	0.370584	0.87	0.61	1.46643e-65	4	Psmb8
Ctla2a.2	1.23973e-68	0.351276	0.504	0.211	1.21592e-64	4	Ctla2a
Cox8a.2	4.08032e-68	0.31734	0.961	0.883	4.00198e-64	4	Cox8a
Clic1.2	8.4469e-67	0.330167	0.834	0.528	8.28472e-63	4	Clic1
Pdia3.1	5.49128e-66	0.343533	0.657	0.356	5.38585e-62	4	Pdia3
Aldoa.1	1.28786e-63	0.33413	0.729	0.441	1.26313e-59	4	Aldoa
Shisa5.1	8.53952e-62	0.31538	0.975	0.907	8.37556e-58	4	Shisa5
Zfp36l2.2	1.08056e-61	0.424264	0.917	0.796	1.05981e-57	4	Zfp36l2
Sept1.1	6.5191e-61	0.327239	0.81	0.533	6.39393e-57	4	Sept1
Klrk1.1	1.00153e-60	0.338471	0.272	0.083	9.82298e-57	4	Klrk1
Ptpn6	2.67025e-60	0.264035	0.384	0.149	2.61899e-56	4	Ptpn6
Sptssa	3.79956e-59	0.280328	0.471	0.215	3.72661e-55	4	Sptssa
Serf2.1	5.29696e-59	0.268667	0.987	0.972	5.19526e-55	4	Serf2
Sell.2	3.66137e-58	-0.359436	0.014	0.299	3.59107e-54	4	Sell
S1pr1	8.62733e-58	-0.360976	0.028	0.318	8.46169e-54	4	S1pr1
Rps27a.2	9.30129e-57	-0.253847	1	1	9.12271e-53	4	Rps27a
Junb.2	1.22954e-56	0.384475	0.992	0.958	1.20593e-52	4	Junb
Pgam1	1.36987e-56	0.269611	0.451	0.203	1.34357e-52	4	Pgam1
Rps19.3	1.88581e-56	-0.352507	1	1	1.8496e-52	4	Rps19
Pik3r1	2.64417e-56	0.28845	0.472	0.219	2.5934e-52	4	Pik3r1
Rpl37a.2	7.14308e-56	-0.320559	1	1	7.00593e-52	4	Rpl37a
Gm8797.3	1.15541e-55	0.336472	0.546	0.271	1.13323e-51	4	Gm8797
Tmem59	2.66046e-55	0.287976	0.542	0.281	2.60938e-51	4	Tmem59
Rplp2.2	1.43932e-54	-0.320607	0.999	1	1.41168e-50	4	Rplp2
Nr4a1.2	7.6073e-54	0.478949	0.55	0.298	7.46124e-50	4	Nr4a1
Cd8a.2	1.87666e-53	-0.431207	0.063	0.365	1.84062e-49	4	Cd8a
Rps21.2	2.49776e-53	-0.251732	1	1	2.44981e-49	4	Rps21
Vim.3	2.39354e-52	-0.546891	0.243	0.532	2.34759e-48	4	Vim
Ndfip1.1	4.76705e-52	0.307392	0.701	0.43	4.67552e-48	4	Ndfip1
Actn1.2	1.59206e-50	-0.306135	0.016	0.271	1.5615e-46	4	Actn1
Ramp1	3.31403e-50	0.253487	0.392	0.171	3.2504e-46	4	Ramp1
Ier2.2	7.08739e-50	0.563904	0.834	0.688	6.95131e-46	4	Ier2
Cd3e.2	2.07569e-49	0.266939	0.973	0.922	2.03584e-45	4	Cd3e
Tcf7.2	3.51926e-49	-0.408685	0.223	0.488	3.45169e-45	4	Tcf7
Thy1.3	1.48254e-47	0.298356	0.803	0.517	1.45407e-43	4	Thy1
Ppp1r18.1	3.63101e-47	0.276313	0.767	0.504	3.56129e-43	4	Ppp1r18
Gpsm3.1	9.02295e-47	0.265559	0.669	0.413	8.84971e-43	4	Gpsm3
Zap70	2.96378e-46	0.258734	0.532	0.286	2.90688e-42	4	Zap70
Gimap1	5.39055e-46	0.253601	0.623	0.364	5.28705e-42	4	Gimap1
Cd37.1	1.25039e-45	0.255596	0.659	0.401	1.22638e-41	4	Cd37
Ucp2.1	2.70684e-45	0.277878	0.769	0.505	2.65487e-41	4	Ucp2
Rpl17.2	2.86146e-45	-0.274157	0.983	0.994	2.80652e-41	4	Rpl17
Rpl5.2	3.66021e-45	-0.337564	0.977	0.985	3.58993e-41	4	Rpl5
Rplp0.3	6.10217e-45	-0.334035	1	1	5.98501e-41	4	Rplp0
Rps12.1	2.46661e-44	-0.304095	1	0.999	2.41926e-40	4	Rps12
Atp1b3	6.444e-44	-0.375324	0.293	0.534	6.32027e-40	4	Atp1b3
Npc2.3	6.60476e-44	-0.374843	0.591	0.737	6.47795e-40	4	Npc2
Igfbp4.3	1.31231e-43	-0.530836	0.013	0.238	1.28712e-39	4	Igfbp4
Hcst.3	2.40391e-43	0.272138	0.948	0.858	2.35775e-39	4	Hcst
Sept9	3.87585e-43	0.251903	0.511	0.276	3.80143e-39	4	Sept9
Edf1.1	6.94957e-43	0.2586	0.717	0.475	6.81614e-39	4	Edf1
Ndufa13.1	7.1684e-43	0.255001	0.801	0.559	7.03077e-39	4	Ndufa13
Ndufa4.1	1.27854e-42	0.260493	0.842	0.624	1.25399e-38	4	Ndufa4
Rpl28.3	1.60742e-42	-0.294314	0.997	0.999	1.57656e-38	4	Rpl28
Gm8369.2	9.66666e-41	-0.346428	0.189	0.438	9.48106e-37	4	Gm8369
BC031181	1.15992e-40	0.256242	0.546	0.318	1.13765e-36	4	BC031181
Rpl21.2	3.11398e-40	-0.261605	0.999	0.999	3.05419e-36	4	Rpl21
Hspa4	7.90439e-40	0.259764	0.553	0.329	7.75263e-36	4	Hspa4
Atp5d.1	1.84389e-39	0.252526	0.795	0.559	1.80849e-35	4	Atp5d
Dennd4a	6.24694e-39	0.251549	0.472	0.254	6.127e-35	4	Dennd4a
Lef1.3	2.55164e-38	-0.365352	0.172	0.399	2.50265e-34	4	Lef1
Eif5a	2.76182e-38	0.305172	0.803	0.614	2.70879e-34	4	Eif5a
Cotl1	3.93933e-38	0.255064	0.698	0.463	3.8637e-34	4	Cotl1
Klf2.1	5.86811e-38	-0.303683	0.623	0.875	5.75544e-34	4	Klf2
Ldha.1	9.28189e-38	0.258865	0.74	0.511	9.10368e-34	4	Ldha
H2-Q6.2	9.73447e-38	0.251563	0.766	0.507	9.54757e-34	4	H2-Q6
Rpl41.2	1.49729e-37	-0.315061	0.982	0.993	1.46854e-33	4	Rpl41
Gnas.2	2.44005e-37	0.268077	0.817	0.627	2.3932e-33	4	Gnas
H1f0	2.61831e-37	0.363872	0.24	0.092	2.56804e-33	4	H1f0
Adgre5	2.11413e-36	0.256713	0.609	0.381	2.07354e-32	4	Adgre5
Hspa8.2	2.23112e-33	0.266531	0.98	0.958	2.18828e-29	4	Hspa8
Il2rg.1	1.41519e-32	0.26236	0.78	0.577	1.38802e-28	4	Il2rg
H2afz.1	5.86561e-32	-0.364463	0.556	0.693	5.75299e-28	4	H2afz
Rgs10.3	6.31764e-32	-0.291791	0.155	0.367	6.19634e-28	4	Rgs10
Rpl15.3	6.21953e-31	-0.258218	0.992	0.996	6.10012e-27	4	Rpl15
Rflnb.2	1.89449e-30	-0.265356	0.083	0.278	1.85812e-26	4	Rflnb
Pde4b	2.05463e-29	0.253604	0.553	0.354	2.01518e-25	4	Pde4b
Dapl1.1	1.22701e-28	-0.274793	0.01	0.168	1.20345e-24	4	Dapl1
Rasgrp2	2.31793e-28	-0.250369	0.173	0.375	2.27342e-24	4	Rasgrp2
Rps17.1	8.86281e-28	-0.254193	0.797	0.868	8.69264e-24	4	Rps17
mt-Co1.2	1.46057e-27	-0.299847	1	1	1.43253e-23	4	mt-Co1
Txnip	2.24482e-27	0.286462	0.752	0.564	2.20172e-23	4	Txnip
Itga4.1	9.50042e-26	-0.265287	0.169	0.361	9.31801e-22	4	Itga4
Ccl4.4	5.06832e-25	-0.951483	0.076	0.238	4.97101e-21	4	Ccl4
Trbv13-1	2.26466e-23	0.312286	0.118	0.038	2.22118e-19	4	Trbv13-1
Ubc.1	1.28172e-22	0.262833	0.86	0.792	1.25712e-18	4	Ubc
Emp3.2	1.15155e-21	-0.292732	0.295	0.456	1.12944e-17	4	Emp3
Nme2.2	1.59811e-21	-0.262065	0.728	0.798	1.56742e-17	4	Nme2
Lars2.2	3.02848e-20	0.339189	0.911	0.867	2.97033e-16	4	Lars2
Smad7.1	7.72627e-18	-0.253792	0.298	0.437	7.57793e-14	4	Smad7
mt-Nd4.1	4.81148e-17	-0.27189	0.869	0.884	4.7191e-13	4	mt-Nd4
Trbv1.4	7.4463e-16	0.597462	0.195	0.103	7.30333e-12	4	Trbv1
Rgcc.1	1.62211e-15	-0.26203	0.209	0.338	1.59097e-11	4	Rgcc
Rpl29.4	2.65008e-15	-0.300631	0.79	0.882	2.59919e-11	4	Rpl29
Jun.3	6.98047e-15	0.324418	0.719	0.599	6.84644e-11	4	Jun
Pim1.3	8.61824e-14	-0.359374	0.386	0.499	8.45277e-10	4	Pim1
Gzma.4	1.72239e-13	-1.04458	0.048	0.142	1.68932e-09	4	Gzma
S100a4.4	1.93134e-06	-0.267816	0.161	0.226	0.0189426	4	S100a4
Ccl5.4	1.38717e-05	-1.17265	0.774	0.63	0.136054	4	Ccl5
Ifi27l2a.3	2.88576e-05	-0.275659	0.708	0.75	0.283035	4	Ifi27l2a
Capg	0	0.638665	0.492	0.053	0	5	Capg
Tnfrsf4	1.75798e-210	0.55	0.351	0.043	1.72423e-206	5	Tnfrsf4
S100a10.4	4.97622e-210	1.05506	0.961	0.75	4.88068e-206	5	S100a10
Foxp3	9.99941e-204	0.283011	0.196	0.009	9.80742e-200	5	Foxp3
Ctla4.2	1.55741e-166	0.710409	0.605	0.182	1.52751e-162	5	Ctla4
S100a11.4	8.38279e-164	0.830241	0.841	0.433	8.22185e-160	5	S100a11
Nrp1	6.12573e-147	0.264837	0.241	0.028	6.00812e-143	5	Nrp1
Maf	3.75665e-137	0.355141	0.364	0.072	3.68453e-133	5	Maf
S100a4.5	5.63184e-129	0.7537	0.563	0.19	5.52371e-125	5	S100a4
Areg	2.05826e-126	0.450104	0.173	0.015	2.01874e-122	5	Areg
Prr13.4	2.04387e-121	0.582581	0.72	0.337	2.00462e-117	5	Prr13
Ikzf2	1.23319e-120	0.405584	0.31	0.06	1.20951e-116	5	Ikzf2
Smco4	2.83065e-120	0.291795	0.345	0.075	2.7763e-116	5	Smco4
Srgn.1	2.79735e-118	0.5605	0.986	0.929	2.74365e-114	5	Srgn
S100a6.4	6.60776e-116	1.12883	0.76	0.41	6.48089e-112	5	S100a6
Itgb1.4	3.8788e-114	0.61921	0.587	0.232	3.80433e-110	5	Itgb1
Crip1.4	2.39523e-109	0.8605	0.987	0.924	2.34925e-105	5	Crip1
Lgals1.4	3.40102e-108	0.804043	0.769	0.41	3.33572e-104	5	Lgals1
Vim.4	6.36058e-108	0.926331	0.792	0.481	6.23846e-104	5	Vim
Rps29.3	1.41254e-105	-0.537313	1	1	1.38542e-101	5	Rps29
Icos	3.5586e-104	0.465732	0.538	0.199	3.49028e-100	5	Icos
Lsp1.2	1.62292e-102	0.623368	0.83	0.54	1.59176e-98	5	Lsp1
Ass1	3.21709e-94	0.479649	0.485	0.177	3.15532e-90	5	Ass1
Ifi27l2a.4	2.36535e-89	1.07409	0.861	0.736	2.31994e-85	5	Ifi27l2a
Rpl35a.3	6.85582e-87	-0.522522	0.986	0.995	6.72419e-83	5	Rpl35a
Zfp36.3	1.45384e-83	0.599606	0.853	0.604	1.42592e-79	5	Zfp36
Cd4	1.75686e-83	0.324251	0.424	0.142	1.72313e-79	5	Cd4
S100a13.2	2.01179e-83	0.440124	0.719	0.406	1.97316e-79	5	S100a13
Rps28.3	7.76614e-81	-0.418242	1	1	7.61703e-77	5	Rps28
Rplp2.3	8.30416e-81	-0.385848	1	1	8.14472e-77	5	Rplp2
Tmsb4x.5	1.29985e-80	0.343182	1	1	1.27489e-76	5	Tmsb4x
Izumo1r	6.17595e-80	0.456459	0.362	0.115	6.05738e-76	5	Izumo1r
Nkg7.5	1.00799e-79	-0.87918	0.261	0.657	9.88632e-76	5	Nkg7
Glrx	9.0881e-79	0.327521	0.364	0.115	8.91361e-75	5	Glrx
Rplp1.4	5.45512e-78	-0.345535	1	1	5.35038e-74	5	Rplp1
Rpl37a.3	6.84453e-78	-0.373724	1	1	6.71311e-74	5	Rpl37a
Tspo.1	7.74935e-77	0.43328	0.791	0.517	7.60056e-73	5	Tspo
Rpl23.1	5.99197e-75	-0.292501	1	1	5.87692e-71	5	Rpl23
Rora.2	9.62859e-74	0.33284	0.446	0.165	9.44372e-70	5	Rora
Rpl36a.3	2.37484e-72	-0.393337	0.994	0.997	2.32924e-68	5	Rpl36a
Rps21.3	7.83854e-71	-0.306493	1	1	7.68804e-67	5	Rps21
Itgb7.1	8.23564e-71	0.436334	0.7	0.421	8.07751e-67	5	Itgb7
Cd5	4.6059e-70	0.379495	0.505	0.224	4.51747e-66	5	Cd5
Ly6e.3	1.49455e-68	0.531427	0.844	0.662	1.46586e-64	5	Ly6e
Emp3.3	1.6563e-68	0.427259	0.713	0.418	1.6245e-64	5	Emp3
Pfn1.4	2.24218e-68	0.377215	0.999	0.968	2.19913e-64	5	Pfn1
Rps20.5	1.49879e-67	-0.446463	1	1	1.47001e-63	5	Rps20
Ndfip1.2	2.48889e-66	0.359761	0.734	0.428	2.4411e-62	5	Ndfip1
Smpdl3a	1.29593e-65	0.290357	0.44	0.18	1.27105e-61	5	Smpdl3a
Tmem176a	4.56466e-65	0.26304	0.134	0.02	4.47702e-61	5	Tmem176a
Cd8b1.4	3.00581e-64	-0.625927	0.101	0.443	2.9481e-60	5	Cd8b1
Clic1.3	4.02503e-64	0.377268	0.81	0.53	3.94775e-60	5	Clic1
Rps8.4	2.33525e-63	-0.316302	1	1	2.29041e-59	5	Rps8
Fkbp1a.1	7.22457e-63	0.380218	0.648	0.373	7.08585e-59	5	Fkbp1a
Rps27.3	4.5649e-62	-0.278584	1	1	4.47725e-58	5	Rps27
H2-D1.2	4.57187e-62	0.332483	0.999	0.993	4.48409e-58	5	H2-D1
Pkp3	4.04978e-60	0.278926	0.39	0.154	3.97203e-56	5	Pkp3
Cd8a.3	4.04994e-60	-0.560239	0.053	0.366	3.97218e-56	5	Cd8a
Actg1.3	8.56869e-60	0.516231	0.973	0.947	8.40417e-56	5	Actg1
Tagln2.2	9.89943e-59	0.481869	0.722	0.487	9.70936e-55	5	Tagln2
Rpl5.3	1.94009e-58	-0.383079	0.967	0.986	1.90284e-54	5	Rpl5
Fxyd5.2	1.23324e-57	0.369317	0.935	0.885	1.20956e-53	5	Fxyd5
Shisa5.2	3.89369e-56	0.352438	0.96	0.909	3.81893e-52	5	Shisa5
Tmem176b	8.9491e-56	0.330693	0.14	0.026	8.77728e-52	5	Tmem176b
Rps27a.3	2.11458e-55	-0.260197	1	1	2.07398e-51	5	Rps27a
Rpl38.2	2.34588e-55	-0.270495	1	1	2.30084e-51	5	Rpl38
Gapdh.1	8.75514e-55	0.376765	0.96	0.924	8.58704e-51	5	Gapdh
Arhgdib.2	6.14993e-53	0.3561	0.919	0.842	6.03185e-49	5	Arhgdib
Ccl5.5	2.31919e-52	-1.94984	0.418	0.663	2.27466e-48	5	Ccl5
Hint1.1	6.67617e-49	0.34321	0.788	0.58	6.54799e-45	5	Hint1
Oaz1.1	7.27037e-49	0.277804	0.986	0.97	7.13078e-45	5	Oaz1
Rpl9.1	4.06168e-48	-0.32113	0.944	0.977	3.9837e-44	5	Rpl9
Satb1.2	1.88877e-47	-0.423364	0.198	0.476	1.8525e-43	5	Satb1
Itm2b.1	7.12144e-47	0.403621	0.895	0.821	6.98471e-43	5	Itm2b
Cyb5a	1.06928e-46	0.270011	0.47	0.237	1.04875e-42	5	Cyb5a
Actb.4	7.78301e-46	0.323819	1	0.984	7.63357e-42	5	Actb
Ahnak.4	4.91396e-45	0.338138	0.645	0.379	4.81961e-41	5	Ahnak
Smap1.1	5.59332e-44	0.304372	0.547	0.316	5.48593e-40	5	Smap1
Flna	6.2119e-44	0.288229	0.511	0.276	6.09263e-40	5	Flna
Vamp8.1	6.96416e-43	0.274672	0.553	0.318	6.83045e-39	5	Vamp8
Samhd1	2.15852e-42	0.364111	0.527	0.305	2.11708e-38	5	Samhd1
Rps12.2	3.40444e-42	-0.286869	1	0.999	3.33907e-38	5	Rps12
Rps26.2	1.10076e-41	-0.266248	0.999	0.999	1.07963e-37	5	Rps26
Cd2.1	1.1314e-41	0.340855	0.629	0.413	1.10968e-37	5	Cd2
Cfl1.2	2.17877e-39	0.318388	0.961	0.928	2.13694e-35	5	Cfl1
Ubl3	2.77028e-39	0.265469	0.437	0.227	2.71709e-35	5	Ubl3
Coro1a.1	2.77898e-39	0.305483	0.954	0.923	2.72562e-35	5	Coro1a
Tnfrsf18	3.78082e-39	0.296455	0.354	0.165	3.70822e-35	5	Tnfrsf18
Arpc3.1	8.50968e-38	0.2816	0.758	0.561	8.3463e-34	5	Arpc3
Pglyrp1	1.07014e-37	0.277632	0.341	0.158	1.04959e-33	5	Pglyrp1
Cdc42	1.23229e-37	0.276111	0.794	0.594	1.20863e-33	5	Cdc42
Rac2.4	6.24569e-37	0.254983	0.971	0.928	6.12577e-33	5	Rac2
Reep5.2	7.39272e-37	0.292947	0.573	0.361	7.25078e-33	5	Reep5
Ppib.1	7.64543e-37	0.286842	0.749	0.555	7.49863e-33	5	Ppib
Nr4a1.3	2.7385e-36	0.42877	0.518	0.302	2.68592e-32	5	Nr4a1
Gna13	4.46757e-36	0.320509	0.612	0.4	4.38179e-32	5	Gna13
Ctsw.3	5.1945e-36	-0.325921	0.156	0.395	5.09477e-32	5	Ctsw
Ucp2.2	8.50329e-36	0.315175	0.711	0.511	8.34002e-32	5	Ucp2
Igfbp4.4	8.99796e-36	-0.474265	0.03	0.236	8.8252e-32	5	Igfbp4
Pycard.2	6.49254e-35	0.284611	0.431	0.237	6.36788e-31	5	Pycard
Ccr7.5	7.23929e-35	-0.46354	0.247	0.482	7.1003e-31	5	Ccr7
Lgals3.1	1.2588e-34	0.436324	0.245	0.098	1.23463e-30	5	Lgals3
Cox6b1.1	1.50151e-34	0.253924	0.747	0.547	1.47268e-30	5	Cox6b1
Glud1	1.98612e-34	0.256627	0.449	0.251	1.94799e-30	5	Glud1
Ldha.2	2.68361e-34	0.306319	0.698	0.515	2.63208e-30	5	Ldha
Anp32a.1	3.08639e-34	0.274247	0.646	0.442	3.02713e-30	5	Anp32a
Ppp1ca.1	4.4151e-34	0.302385	0.701	0.514	4.33033e-30	5	Ppp1ca
Zfp36l1	5.59068e-34	0.395429	0.596	0.397	5.48334e-30	5	Zfp36l1
Nfkbia.3	6.70367e-34	0.480266	0.773	0.645	6.57496e-30	5	Nfkbia
Rps19.4	2.33667e-33	-0.263165	1	1	2.29181e-29	5	Rps19
Klrd1.3	2.51469e-33	-0.326216	0.055	0.261	2.46641e-29	5	Klrd1
Eno1.2	2.52561e-33	0.289994	0.68	0.488	2.47712e-29	5	Eno1
Ccl4.5	5.26922e-33	-1.03318	0.046	0.24	5.16805e-29	5	Ccl4
Anxa6.2	1.14689e-32	0.273073	0.563	0.363	1.12487e-28	5	Anxa6
Eef1b2.1	2.49108e-32	-0.270946	0.967	0.983	2.44325e-28	5	Eef1b2
Rpl23a.2	3.83835e-32	-0.280004	0.899	0.946	3.76465e-28	5	Rpl23a
Gng5.1	7.21858e-32	0.255973	0.792	0.624	7.07998e-28	5	Gng5
Arpc1b.2	3.3315e-31	0.258478	0.831	0.688	3.26754e-27	5	Arpc1b
Plac8.1	5.23544e-31	-0.281794	0.101	0.315	5.13492e-27	5	Plac8
Ypel3.1	7.57281e-31	0.296756	0.685	0.511	7.42741e-27	5	Ypel3
Prelid1.1	2.46278e-30	0.274369	0.59	0.405	2.41549e-26	5	Prelid1
Rpl41.3	2.9821e-30	-0.282816	0.981	0.993	2.92484e-26	5	Rpl41
Polr1d.1	3.99729e-30	0.254939	0.698	0.52	3.92054e-26	5	Polr1d
Rpl10.1	6.46015e-30	-0.283099	0.776	0.899	6.33611e-26	5	Rpl10
Dusp2.3	8.09701e-30	-0.460042	0.385	0.578	7.94155e-26	5	Dusp2
Cdk2ap2	8.46694e-30	0.290992	0.698	0.519	8.30438e-26	5	Cdk2ap2
Tigit	1.25315e-29	0.256874	0.27	0.123	1.22909e-25	5	Tigit
Vps37b.2	2.13864e-29	-0.278643	0.457	0.674	2.09758e-25	5	Vps37b
Ly6a.3	1.08827e-28	0.353827	0.652	0.46	1.06738e-24	5	Ly6a
Cnn2.1	2.16626e-28	0.29671	0.717	0.556	2.12467e-24	5	Cnn2
Txnip.1	2.32739e-28	-0.32698	0.404	0.596	2.2827e-24	5	Txnip
Junb.3	7.05615e-28	0.265058	0.984	0.959	6.92067e-24	5	Junb
Il2rg.2	4.13131e-27	0.254672	0.739	0.581	4.05199e-23	5	Il2rg
Hif1a	1.25631e-26	0.253842	0.453	0.27	1.23219e-22	5	Hif1a
Gramd3.1	1.84974e-26	-0.283798	0.19	0.384	1.81422e-22	5	Gramd3
Ly6c2.3	1.86748e-26	-0.49898	0.081	0.258	1.83163e-22	5	Ly6c2
Bcl2	1.02964e-25	-0.257136	0.237	0.434	1.00987e-21	5	Bcl2
Gpx1	9.42939e-25	0.336794	0.625	0.471	9.24835e-21	5	Gpx1
Btg2.2	7.76832e-24	0.253263	0.723	0.558	7.61917e-20	5	Btg2
Ptprcap.3	1.66277e-23	0.25013	0.747	0.621	1.63085e-19	5	Ptprcap
Ltb.3	4.05388e-23	0.254273	0.824	0.709	3.97605e-19	5	Ltb
Ier2.3	1.33631e-21	0.278114	0.782	0.693	1.31065e-17	5	Ier2
Xcl1.4	1.77258e-21	-0.28126	0.027	0.163	1.73855e-17	5	Xcl1
Fos.4	3.02625e-21	0.291264	0.812	0.751	2.96814e-17	5	Fos
Lef1.4	1.70068e-20	-0.272039	0.235	0.393	1.66803e-16	5	Lef1
mt-Nd4.2	1.56851e-19	-0.286064	0.824	0.888	1.53839e-15	5	mt-Nd4
H2afz.2	2.1544e-18	0.283924	0.769	0.674	2.11304e-14	5	H2afz
Egr1.5	2.52588e-16	0.370231	0.414	0.282	2.47738e-12	5	Egr1
Gzmb.4	2.53462e-16	-0.431596	0.082	0.21	2.48596e-12	5	Gzmb
Rgcc.2	6.18633e-16	0.318782	0.447	0.316	6.06755e-12	5	Rgcc
Gzma.5	1.93701e-12	-0.948136	0.051	0.142	1.89982e-08	5	Gzma
Trbv1.5	1.43656e-08	0.453454	0.17	0.106	0.000140897	5	Trbv1
Gm42418.3	3.4509e-06	-0.320564	1	1	0.0338464	5	Gm42418
Cd7.4	3.49338e-06	-0.417526	0.235	0.305	0.0342631	5	Cd7
Ccl5.6	0	2.13511	1	0.614	0	6	Ccl5
Ccl4.6	0	1.77427	0.92	0.169	0	6	Ccl4
Nkg7.6	0	1.45811	0.998	0.595	0	6	Nkg7
Ccl3.3	0	1.31356	0.621	0.05	0	6	Ccl3
Gzmk.1	0	0.871024	0.704	0.066	0	6	Gzmk
Lag3	3.41554e-286	0.417062	0.391	0.033	3.34996e-282	6	Lag3
AW112010.4	1.99377e-261	1.13909	1	0.756	1.95549e-257	6	AW112010
Cd52.4	2.13238e-241	0.98868	1	0.958	2.09144e-237	6	Cd52
Cd8a.4	4.39783e-216	0.796772	0.856	0.299	4.3134e-212	6	Cd8a
Rps29.4	1.07663e-215	-0.865038	1	1	1.05596e-211	6	Rps29
Cxcr6.4	4.19222e-205	0.633105	0.69	0.175	4.11173e-201	6	Cxcr6
Rps28.4	5.36024e-203	-0.759375	0.998	1	5.25732e-199	6	Rps28
Cd7.5	1.07615e-199	1.18362	0.754	0.264	1.05549e-195	6	Cd7
Gzmb.5	4.42419e-185	0.755935	0.652	0.163	4.33924e-181	6	Gzmb
Cd160	3.33359e-181	0.503258	0.475	0.09	3.26959e-177	6	Cd160
Cd3g.3	4.3459e-181	0.740495	0.987	0.858	4.26246e-177	6	Cd3g
H2-K1.1	2.61992e-171	0.62792	1	0.981	2.56962e-167	6	H2-K1
Rps19.5	3.69156e-167	-0.71455	0.998	1	3.62069e-163	6	Rps19
Cd8b1.5	3.59564e-162	0.731948	0.893	0.377	3.5266e-158	6	Cd8b1
Rplp1.5	6.53925e-160	-0.558031	1	1	6.4137e-156	6	Rplp1
Pfn1.5	1.15626e-158	0.667016	1	0.969	1.13406e-154	6	Pfn1
Rps20.6	2.31907e-156	-0.755703	1	1	2.27455e-152	6	Rps20
S100a11.5	2.31521e-155	0.735674	0.869	0.435	2.27076e-151	6	S100a11
S100a6.5	1.72842e-148	0.822376	0.88	0.404	1.69523e-144	6	S100a6
Klrd1.4	3.21073e-148	0.815299	0.634	0.213	3.14909e-144	6	Klrd1
Tmsb4x.6	1.80385e-147	0.52348	1	1	1.76922e-143	6	Tmsb4x
Tigit.1	2.05231e-145	0.442133	0.47	0.109	2.0129e-141	6	Tigit
Rpsa.2	1.07901e-141	-0.466002	1	1	1.0583e-137	6	Rpsa
Actb.5	2.33436e-140	0.602293	1	0.984	2.28954e-136	6	Actb
Gzma.6	9.62958e-137	1.43006	0.455	0.109	9.44469e-133	6	Gzma
Rps21.4	1.34168e-136	-0.459643	1	1	1.31592e-132	6	Rps21
Nr4a2	2.60371e-134	0.543533	0.567	0.167	2.55372e-130	6	Nr4a2
Klf2.2	7.52528e-131	-0.901893	0.496	0.882	7.38079e-127	6	Klf2
Cd3e.3	1.46436e-128	0.540978	0.99	0.922	1.43624e-124	6	Cd3e
Rps8.5	2.03299e-128	-0.5041	1	1	1.99396e-124	6	Rps8
Rpl8.2	5.83603e-123	-0.508431	0.997	0.999	5.72398e-119	6	Rpl8
Tmsb10.3	3.13697e-121	-0.573453	0.998	1	3.07674e-117	6	Tmsb10
Rps2.3	3.9758e-121	-0.533366	0.998	1	3.89947e-117	6	Rps2
Gm10076.2	1.7988e-119	-0.3682	1	1	1.76426e-115	6	Gm10076
Rpl5.4	1.72468e-117	-0.585254	0.941	0.988	1.69156e-113	6	Rpl5
Rpl36a.4	6.28433e-116	-0.551043	0.987	0.998	6.16367e-112	6	Rpl36a
Ms4a4b.3	1.0443e-112	0.624946	0.898	0.594	1.02425e-108	6	Ms4a4b
Rps3a1.3	7.09547e-111	-0.405868	1	1	6.95924e-107	6	Rps3a1
Rps26.3	3.17871e-107	-0.476635	0.995	1	3.11768e-103	6	Rps26
Ptprcap.4	2.5541e-105	0.559038	0.911	0.61	2.50506e-101	6	Ptprcap
Cst7	4.18219e-105	0.433488	0.578	0.21	4.10189e-101	6	Cst7
Rps16.2	8.21796e-105	-0.408318	1	1	8.06018e-101	6	Rps16
Hcst.4	1.6757e-104	0.533604	0.974	0.858	1.64353e-100	6	Hcst
Tpt1	5.61616e-102	-0.322823	1	1	5.50833e-98	6	Tpt1
Gimap7.2	7.17912e-102	0.455012	0.604	0.234	7.04128e-98	6	Gimap7
Rpl23.2	3.08693e-101	-0.366157	1	1	3.02767e-97	6	Rpl23
Cox8a.3	1.09045e-96	0.449402	0.969	0.883	1.06952e-92	6	Cox8a
Rplp2.4	1.2616e-96	-0.43329	1	1	1.23738e-92	6	Rplp2
Rbpj	1.66551e-96	0.277564	0.327	0.074	1.63353e-92	6	Rbpj
Tcf7.3	1.81966e-96	-0.605925	0.046	0.499	1.78472e-92	6	Tcf7
Rgs1.5	1.56432e-95	0.560306	0.788	0.392	1.53428e-91	6	Rgs1
Ccr7.6	3.76819e-95	-0.926321	0.048	0.495	3.69584e-91	6	Ccr7
Rps27a.4	1.46579e-94	-0.364155	1	1	1.43765e-90	6	Rps27a
Itm2b.2	5.24455e-94	0.488401	0.956	0.817	5.14385e-90	6	Itm2b
Rps27.4	9.60586e-94	-0.356277	1	1	9.42143e-90	6	Rps27
Rpl38.3	1.22406e-93	-0.361244	1	1	1.20056e-89	6	Rpl38
Arl6ip1.1	9.98331e-93	0.522457	0.76	0.438	9.79163e-89	6	Arl6ip1
Rplp0.4	1.44101e-91	-0.503487	1	1	1.41334e-87	6	Rplp0
Rpl35.3	3.98044e-91	-0.489435	0.993	0.999	3.90402e-87	6	Rpl35
Rps12.3	2.19457e-88	-0.43808	0.995	1	2.15243e-84	6	Rps12
Emb.1	4.81692e-88	-0.617243	0.126	0.563	4.72444e-84	6	Emb
mt-Co3.2	7.55409e-88	-0.45557	0.995	0.998	7.40905e-84	6	mt-Co3
Rps4x.2	8.97829e-88	-0.395368	1	1	8.80591e-84	6	Rps4x
Eef1a1.2	5.48274e-87	-0.326347	1	1	5.37747e-83	6	Eef1a1
Satb1.3	1.47904e-86	-0.615573	0.059	0.484	1.45065e-82	6	Satb1
Tox	8.72847e-86	0.355203	0.417	0.13	8.56089e-82	6	Tox
Il7r.1	1.19557e-85	-0.594205	0.064	0.487	1.17261e-81	6	Il7r
Ctla4.3	1.71249e-85	0.39461	0.532	0.192	1.67961e-81	6	Ctla4
Cyba.4	1.79106e-85	0.474537	0.9	0.643	1.75668e-81	6	Cyba
Id2.5	1.00925e-84	0.532787	0.767	0.412	9.89874e-81	6	Id2
H2-Q7.3	7.58102e-83	0.445584	0.954	0.805	7.43547e-79	6	H2-Q7
Eef1b2.2	9.59236e-81	-0.461002	0.946	0.985	9.40819e-77	6	Eef1b2
Lgals1.5	1.29515e-79	0.428298	0.782	0.413	1.27028e-75	6	Lgals1
Rpl13.2	2.6236e-79	-0.354766	1	1	2.57322e-75	6	Rpl13
Sh3bgrl3.4	3.43107e-79	0.473091	0.962	0.845	3.36519e-75	6	Sh3bgrl3
Rpl12.3	5.19781e-79	-0.421683	0.997	0.997	5.09801e-75	6	Rpl12
Sh2d2a.2	6.42883e-79	0.496139	0.701	0.361	6.30539e-75	6	Sh2d2a
Rgs16	2.69091e-78	0.277294	0.222	0.042	2.63924e-74	6	Rgs16
mt-Nd2.1	3.5162e-73	-0.478822	0.841	0.96	3.44869e-69	6	mt-Nd2
Klre1	6.18453e-73	0.253228	0.209	0.04	6.06579e-69	6	Klre1
Rps15.2	1.82039e-72	-0.428808	0.883	0.971	1.78544e-68	6	Rps15
Rpl37a.4	2.08495e-72	-0.37169	1	1	2.04491e-68	6	Rpl37a
Rpl3.1	2.3014e-72	-0.374523	0.989	0.999	2.25721e-68	6	Rpl3
Rps7.2	5.33608e-72	-0.350464	1	1	5.23363e-68	6	Rps7
Ptms	1.22299e-70	0.276749	0.384	0.124	1.1995e-66	6	Ptms
Rgs3	1.97771e-70	0.264237	0.34	0.102	1.93974e-66	6	Rgs3
Rpl15.4	2.08855e-70	-0.420653	0.982	0.997	2.04845e-66	6	Rpl15
Rpl28.4	5.66175e-70	-0.408545	0.992	1	5.55304e-66	6	Rpl28
Rpl39.1	6.87719e-70	-0.280617	1	1	6.74515e-66	6	Rpl39
S100a10.5	1.37185e-69	0.345784	0.961	0.753	1.34551e-65	6	S100a10
H2-T23.1	9.63946e-69	0.435232	0.775	0.499	9.45438e-65	6	H2-T23
Rps5.3	3.01011e-68	-0.333088	1	1	2.95231e-64	6	Rps5
Dusp2.4	9.29907e-68	0.492484	0.841	0.54	9.12053e-64	6	Dusp2
Junb.4	3.52742e-67	-0.623398	0.898	0.966	3.45969e-63	6	Junb
Rpl14.2	2.81484e-66	-0.411182	0.989	0.997	2.76079e-62	6	Rpl14
B2m	4.18557e-66	0.305713	1	0.998	4.10521e-62	6	B2m
Ctsw.4	4.7871e-66	0.413115	0.675	0.352	4.69519e-62	6	Ctsw
Psmb8.2	6.3452e-66	0.410888	0.856	0.615	6.22338e-62	6	Psmb8
Cd48.2	4.65375e-65	0.329515	0.555	0.248	4.5644e-61	6	Cd48
S100a4.6	1.27418e-62	0.340272	0.502	0.199	1.24972e-58	6	S100a4
Rpl6.1	3.64571e-62	-0.289069	1	1	3.57572e-58	6	Rpl6
Lef1.5	4.64395e-62	-0.470635	0.062	0.405	4.55479e-58	6	Lef1
Stard3nl	5.36466e-62	0.27479	0.35	0.118	5.26166e-58	6	Stard3nl
Nfkbia.4	1.9438e-61	-0.737339	0.379	0.678	1.90648e-57	6	Nfkbia
Ikzf3	3.42762e-61	0.288535	0.429	0.165	3.36181e-57	6	Ikzf3
Rps9	9.67783e-61	-0.259589	1	1	9.49202e-57	6	Rps9
Itgb2.4	1.00117e-60	0.356192	0.657	0.352	9.81945e-57	6	Itgb2
Rps25.1	8.97713e-60	-0.382642	0.801	0.946	8.80477e-56	6	Rps25
Rps24.2	1.48814e-59	-0.282293	1	1	1.45956e-55	6	Rps24
Ptpn18.1	3.2274e-59	0.341025	0.974	0.914	3.16543e-55	6	Ptpn18
Rpl7.1	4.43264e-59	-0.314544	0.99	0.998	4.34753e-55	6	Rpl7
Gm10260.3	6.35401e-59	-0.420735	0.039	0.369	6.23201e-55	6	Gm10260
Rpl10-ps3.3	6.55102e-58	-0.45578	0.967	0.989	6.42524e-54	6	Rpl10-ps3
Cd3d.1	7.08174e-58	0.346117	0.966	0.908	6.94577e-54	6	Cd3d
Rpl10.2	1.0774e-57	-0.427343	0.762	0.899	1.05671e-53	6	Rpl10
Gapdh.2	3.9668e-57	0.343535	0.979	0.923	3.89063e-53	6	Gapdh
mt-Cytb	7.24555e-57	-0.346671	0.961	0.993	7.10644e-53	6	mt-Cytb
mt-Nd1.1	7.74403e-57	-0.405838	0.915	0.978	7.59535e-53	6	mt-Nd1
Gng2	8.20677e-56	0.274808	0.429	0.175	8.0492e-52	6	Gng2
Rac2.5	8.59182e-56	0.310074	0.984	0.927	8.42686e-52	6	Rac2
Psmb9.1	1.06378e-55	0.355145	0.658	0.376	1.04335e-51	6	Psmb9
Hspa8.3	5.49684e-55	-0.410374	0.88	0.966	5.3913e-51	6	Hspa8
Lcp1.3	6.80167e-54	0.380559	0.744	0.472	6.67108e-50	6	Lcp1
Anxa2	9.67675e-54	0.256221	0.381	0.143	9.49095e-50	6	Anxa2
mt-Atp6.1	1.53706e-53	-0.402962	0.936	0.982	1.50755e-49	6	mt-Atp6
Rps6.1	4.46361e-51	-0.320587	0.964	0.991	4.37791e-47	6	Rps6
Rpl23a.3	1.93308e-50	-0.374824	0.877	0.948	1.89597e-46	6	Rpl23a
Rpl35a.4	2.72419e-50	-0.433862	0.993	0.995	2.67189e-46	6	Rpl35a
Pim1.4	2.83101e-50	-0.626767	0.21	0.511	2.77665e-46	6	Pim1
Rpl4.1	2.83371e-50	-0.346269	0.92	0.971	2.7793e-46	6	Rpl4
Ifng.5	6.7185e-50	0.289069	0.437	0.18	6.58951e-46	6	Ifng
Klf3.1	7.0567e-50	-0.379585	0.094	0.397	6.92122e-46	6	Klf3
Rack1	9.21901e-50	-0.308805	0.959	0.988	9.04201e-46	6	Rack1
Txn1.1	1.8836e-48	0.331494	0.612	0.349	1.84744e-44	6	Txn1
Trbc2	2.42465e-47	0.39351	0.941	0.849	2.3781e-43	6	Trbc2
Ndfip1.3	2.61363e-47	0.320994	0.704	0.433	2.56345e-43	6	Ndfip1
Gimap4.2	6.37058e-47	0.332759	0.752	0.482	6.24827e-43	6	Gimap4
Gm26917.3	2.47549e-46	-0.552807	0.192	0.492	2.42796e-42	6	Gm26917
Clic1.4	5.03241e-46	0.337406	0.772	0.536	4.93578e-42	6	Clic1
Rpl10a.3	1.32071e-45	-0.310213	0.997	0.998	1.29535e-41	6	Rpl10a
Ctsd.2	1.3711e-45	0.335101	0.624	0.37	1.34478e-41	6	Ctsd
mt-Atp8.1	6.37942e-45	-0.264246	0.995	0.999	6.25694e-41	6	mt-Atp8
Cox6c.1	8.24193e-45	0.302889	0.905	0.767	8.08368e-41	6	Cox6c
Sell.3	8.84586e-45	-0.335552	0.028	0.294	8.67602e-41	6	Sell
Rps18.1	1.09927e-44	-0.291358	0.997	0.999	1.07816e-40	6	Rps18
S1pr1.1	1.38062e-44	-0.347163	0.044	0.313	1.35411e-40	6	S1pr1
Ndufa13.2	1.71111e-44	0.32589	0.79	0.563	1.67825e-40	6	Ndufa13
Nme2.3	2.88608e-44	-0.388799	0.612	0.806	2.83067e-40	6	Nme2
Hsp90ab1	4.85152e-44	-0.33229	0.903	0.975	4.75837e-40	6	Hsp90ab1
Ubb.1	7.11586e-44	0.252219	1	0.994	6.97924e-40	6	Ubb
Gm8797.4	1.04101e-43	-0.380244	0.046	0.314	1.02102e-39	6	Gm8797
Rpl26.3	1.2587e-43	-0.275249	0.998	0.999	1.23453e-39	6	Rpl26
Ctla2a.3	1.64737e-43	0.290004	0.463	0.218	1.61574e-39	6	Ctla2a
Myl12a.2	6.84043e-43	0.351212	0.778	0.579	6.70909e-39	6	Myl12a
Zyx.2	6.92974e-43	0.282409	0.535	0.281	6.79669e-39	6	Zyx
Cmtm7	3.4949e-42	0.267346	0.432	0.206	3.4278e-38	6	Cmtm7
Ppp1r15a.1	1.08639e-41	-0.41175	0.445	0.672	1.06553e-37	6	Ppp1r15a
Rgcc.3	2.6133e-41	-0.417413	0.082	0.347	2.56313e-37	6	Rgcc
Thy1.4	3.76993e-41	0.31359	0.777	0.523	3.69754e-37	6	Thy1
mt-Nd4.3	4.93378e-41	-0.402269	0.741	0.894	4.83905e-37	6	mt-Nd4
Sumo2.2	1.79227e-40	0.297013	0.765	0.534	1.75786e-36	6	Sumo2
Trbv29	1.82507e-40	0.443653	0.153	0.037	1.79003e-36	6	Trbv29
Capzb.1	3.7412e-40	0.337197	0.722	0.498	3.66937e-36	6	Capzb
Dusp10.3	4.20576e-40	-0.404187	0.12	0.381	4.12501e-36	6	Dusp10
Atp1b3.1	1.19986e-38	-0.360821	0.279	0.532	1.17682e-34	6	Atp1b3
Jun.4	3.25622e-38	-0.4989	0.369	0.629	3.1937e-34	6	Jun
Rgs10.4	3.70493e-38	-0.337445	0.112	0.367	3.6338e-34	6	Rgs10
Prr13.5	4.8075e-38	0.275334	0.599	0.35	4.7152e-34	6	Prr13
mt-Co1.3	1.28399e-37	-0.339134	1	1	1.25934e-33	6	mt-Co1
Jund.3	1.70869e-37	-0.454595	0.88	0.946	1.67588e-33	6	Jund
Gpr132.2	1.75198e-37	-0.38086	0.182	0.438	1.71834e-33	6	Gpr132
Lsp1.3	4.85641e-37	0.288286	0.757	0.549	4.76316e-33	6	Lsp1
Rpl31	4.71923e-36	-0.290806	0.741	0.885	4.62862e-32	6	Rpl31
Fyn	8.9358e-36	0.273532	0.599	0.361	8.76424e-32	6	Fyn
Vps37b.3	9.3352e-36	-0.369137	0.461	0.671	9.15596e-32	6	Vps37b
Itgal.3	1.38069e-35	0.281236	0.593	0.358	1.35418e-31	6	Itgal
Rpl21.3	1.97908e-35	-0.259058	1	0.999	1.94108e-31	6	Rpl21
Eef1g	2.19873e-35	-0.331216	0.415	0.633	2.15652e-31	6	Eef1g
Gramd3.2	3.20594e-35	-0.323067	0.136	0.386	3.14439e-31	6	Gramd3
Igfbp4.5	1.32485e-34	-0.495592	0.02	0.235	1.29941e-30	6	Igfbp4
Rps17.2	1.57662e-34	-0.291929	0.731	0.872	1.54635e-30	6	Rps17
Ssh2	1.66657e-34	-0.259328	0.053	0.281	1.63457e-30	6	Ssh2
Ly6a.4	2.38274e-34	-0.415769	0.243	0.494	2.33699e-30	6	Ly6a
Cox5b.2	3.33927e-34	0.272901	0.782	0.579	3.27516e-30	6	Cox5b
Tra2b.3	4.86895e-34	-0.398924	0.624	0.792	4.77547e-30	6	Tra2b
Actg1.4	7.1086e-34	0.278033	0.982	0.946	6.97212e-30	6	Actg1
Il4ra.1	4.49448e-33	-0.289586	0.054	0.274	4.40819e-29	6	Il4ra
Rpl41.4	5.64055e-33	-0.324176	0.987	0.992	5.53225e-29	6	Rpl41
Xcl1.5	5.89829e-33	0.252685	0.322	0.138	5.78505e-29	6	Xcl1
Tagln2.3	6.71766e-33	-0.364167	0.289	0.523	6.58868e-29	6	Tagln2
Cox6b1.2	4.88079e-32	0.27737	0.737	0.55	4.78708e-28	6	Cox6b1
Rflnb.3	6.26946e-32	-0.289547	0.061	0.277	6.14908e-28	6	Rflnb
Trbv5	1.46707e-31	0.364893	0.232	0.089	1.4389e-27	6	Trbv5
Kdm6b.1	4.27241e-31	-0.314507	0.067	0.278	4.19038e-27	6	Kdm6b
Nr4a1.4	5.97047e-31	-0.411557	0.112	0.336	5.85583e-27	6	Nr4a1
Hmgn1	1.15786e-30	-0.252371	0.126	0.357	1.13563e-26	6	Hmgn1
Ier2.4	1.32055e-30	-0.405523	0.532	0.714	1.2952e-26	6	Ier2
Foxp1.1	1.33924e-30	-0.301332	0.205	0.432	1.31353e-26	6	Foxp1
Xist.4	2.70319e-30	-0.34578	0.005	0.189	2.65129e-26	6	Xist
Sec61g.1	3.99894e-30	0.263294	0.842	0.691	3.92216e-26	6	Sec61g
Actn1.3	5.14772e-30	-0.251279	0.057	0.265	5.04889e-26	6	Actn1
Hmgb2	6.64374e-30	0.300597	0.841	0.686	6.51618e-26	6	Hmgb2
Gimap5	4.03139e-29	0.280056	0.688	0.476	3.95398e-25	6	Gimap5
H2-Q6.3	6.26477e-29	0.256772	0.724	0.514	6.14448e-25	6	H2-Q6
Abracl.2	6.34302e-29	0.277666	0.647	0.465	6.22123e-25	6	Abracl
Npm1.1	2.453e-28	-0.279503	0.8	0.906	2.4059e-24	6	Npm1
Ier5.1	3.78804e-28	-0.338175	0.297	0.511	3.71531e-24	6	Ier5
Smad7.2	8.82915e-28	-0.316492	0.228	0.44	8.65963e-24	6	Smad7
Actr3.1	1.72377e-27	0.254693	0.722	0.533	1.69067e-23	6	Actr3
Arl4c	2.53759e-27	-0.262877	0.159	0.374	2.48887e-23	6	Arl4c
Klf13.1	1.5006e-26	-0.294538	0.217	0.424	1.47179e-22	6	Klf13
Zfp36l1.1	1.78151e-26	-0.313107	0.213	0.429	1.7473e-22	6	Zfp36l1
Zc3hav1.2	2.72993e-26	-0.305326	0.284	0.493	2.67752e-22	6	Zc3hav1
Atp5j2.1	2.81072e-26	0.251899	0.819	0.681	2.75676e-22	6	Atp5j2
Ptprc.1	6.84624e-26	0.256071	0.905	0.798	6.71479e-22	6	Ptprc
Txnip.2	1.98267e-25	-0.364528	0.417	0.593	1.9446e-21	6	Txnip
Rpl22l1	2.42247e-25	-0.251884	0.905	0.951	2.37596e-21	6	Rpl22l1
Ypel3.2	3.29234e-25	0.272802	0.686	0.513	3.22913e-21	6	Ypel3
Tubb5	4.32665e-25	-0.267317	0.296	0.497	4.24358e-21	6	Tubb5
Dapl1.2	5.99829e-25	-0.265831	0.008	0.166	5.88312e-21	6	Dapl1
Sub1	3.25723e-23	0.257852	0.854	0.772	3.19469e-19	6	Sub1
Gmfg.1	9.97394e-23	0.258931	0.711	0.568	9.78244e-19	6	Gmfg
Ifrd1	4.29582e-22	-0.2528	0.128	0.306	4.21334e-18	6	Ifrd1
Fam107b	5.12502e-22	-0.276135	0.419	0.584	5.02662e-18	6	Fam107b
Btg1.3	9.17707e-22	-0.297696	0.929	0.957	9.00087e-18	6	Btg1
Trbc1	5.41942e-21	0.370817	0.499	0.354	5.31537e-17	6	Trbc1
Ifi27l2a.5	8.58092e-21	0.285045	0.836	0.74	8.41617e-17	6	Ifi27l2a
Zfp36.4	1.59537e-20	-0.418316	0.475	0.637	1.56474e-16	6	Zfp36
Fos.5	1.72016e-18	-0.349588	0.629	0.766	1.68714e-14	6	Fos
Clk1.3	1.87098e-18	-0.321513	0.43	0.567	1.83506e-14	6	Clk1
Gna13.1	1.89036e-18	-0.254421	0.271	0.43	1.85407e-14	6	Gna13
Cd28.2	8.47276e-18	-0.262257	0.394	0.562	8.31009e-14	6	Cd28
Gm47283.1	4.38759e-17	-0.264834	0.169	0.319	4.30335e-13	6	Gm47283
Gpx1.1	2.96485e-16	-0.251617	0.351	0.495	2.90792e-12	6	Gpx1
Fus.4	8.0687e-15	-0.278572	0.396	0.522	7.91378e-11	6	Fus
Ly6c2.4	6.06535e-11	-0.336502	0.138	0.252	5.94889e-07	6	Ly6c2
Trbv1.6	4.22247e-07	-0.336837	0.049	0.116	0.0041414	6	Trbv1
Pfn1.6	3.74184e-51	-0.59884	0.94	0.973	3.67e-47	7	Pfn1
Cd52.5	6.95752e-46	-0.639739	0.93	0.963	6.82394e-42	7	Cd52
Sh3bgrl3.5	1.81346e-40	-0.492737	0.818	0.855	1.77864e-36	7	Sh3bgrl3
Ubb.2	7.62879e-37	-0.314709	0.985	0.995	7.48232e-33	7	Ubb
Tmsb10.4	1.91175e-36	-0.309158	1	1	1.87505e-32	7	Tmsb10
Clic1.5	2.11942e-36	-0.365099	0.275	0.572	2.07872e-32	7	Clic1
Tmsb4x.7	2.20824e-34	-0.29907	1	1	2.16584e-30	7	Tmsb4x
Gimap4.3	2.74661e-34	-0.369467	0.234	0.519	2.69388e-30	7	Gimap4
Itm2b.3	8.12847e-34	-0.392385	0.77	0.831	7.9724e-30	7	Itm2b
Rpl29.5	4.21858e-30	-0.537297	0.89	0.873	4.13758e-26	7	Rpl29
Shisa5.3	6.93753e-30	-0.300171	0.899	0.914	6.80433e-26	7	Shisa5
Ctla2a.4	2.74517e-28	0.326375	0.424	0.223	2.69246e-24	7	Ctla2a
Cd3g.4	2.55784e-27	-0.367993	0.853	0.868	2.50873e-23	7	Cd3g
Tspo.2	6.344e-27	-0.298961	0.315	0.555	6.2222e-23	7	Tspo
Srgn.2	6.19837e-25	-0.305569	0.909	0.936	6.07936e-21	7	Srgn
Ndfip1.4	1.38382e-24	-0.281879	0.24	0.467	1.35725e-20	7	Ndfip1
Malat1.3	1.8507e-24	-0.253966	0.921	0.981	1.81517e-20	7	Malat1
Emp3.4	1.58552e-23	-0.313441	0.234	0.456	1.55507e-19	7	Emp3
Actb.6	1.3468e-22	-0.285425	0.94	0.988	1.32094e-18	7	Actb
S100a11.6	1.70033e-22	-0.411311	0.273	0.48	1.66768e-18	7	S100a11
Ndufa13.3	4.68593e-22	-0.256955	0.373	0.594	4.59596e-18	7	Ndufa13
Gimap3.2	5.71137e-22	-0.265037	0.356	0.584	5.60171e-18	7	Gimap3
Fxyd5.3	1.15091e-20	-0.262299	0.861	0.891	1.12881e-16	7	Fxyd5
Cytip	3.12673e-20	-0.255698	0.348	0.566	3.0667e-16	7	Cytip
Ms4a4b.4	3.87808e-18	-0.349185	0.478	0.626	3.80362e-14	7	Ms4a4b
Btg2.3	1.50285e-17	-0.346862	0.424	0.581	1.474e-13	7	Btg2
Lsp1.4	8.18069e-16	-0.267745	0.397	0.575	8.02362e-12	7	Lsp1
Egr1.7	1.17054e-15	-0.619469	0.149	0.303	1.14807e-11	7	Egr1
H3f3b.3	1.01223e-14	-0.286822	0.983	0.994	9.92795e-11	7	H3f3b
Ly6e.4	1.08438e-14	-0.361138	0.642	0.679	1.06356e-10	7	Ly6e
Cyba.5	1.93205e-14	-0.309917	0.602	0.666	1.89495e-10	7	Cyba
Ptprcap.5	3.96724e-14	-0.275853	0.534	0.638	3.89107e-10	7	Ptprcap
Lgals1.6	2.22586e-13	-0.53663	0.309	0.449	2.18312e-09	7	Lgals1
Junb.5	3.17885e-13	-0.283217	0.963	0.961	3.11782e-09	7	Junb
Igfbp4.6	3.50981e-13	-0.348194	0.095	0.227	3.44242e-09	7	Igfbp4
S100a10.6	6.66129e-12	-0.391192	0.762	0.768	6.5334e-08	7	S100a10
Zfp36.5	3.25461e-11	-0.416948	0.584	0.628	3.19212e-07	7	Zfp36
S100a4.7	7.14508e-10	-0.272913	0.112	0.228	7.0079e-06	7	S100a4
Nr4a1.5	1.5274e-09	-0.252133	0.203	0.327	1.49807e-05	7	Nr4a1
Dusp1.4	9.08983e-08	-0.328674	0.75	0.755	0.00089153	7	Dusp1
Fos.6	1.40079e-05	-0.330489	0.803	0.753	0.137389	7	Fos
Uba52.3	1.33992e-168	-0.667648	1	1	1.3142e-164	8	Uba52
Rpl9-ps6.3	1.19573e-158	-0.818199	0.988	1	1.17277e-154	8	Rpl9-ps6
Rps15a.2	1.09483e-151	-0.621328	1	1	1.07381e-147	8	Rps15a
Rpl19.3	7.56498e-147	-0.614957	0.998	1	7.41973e-143	8	Rpl19
Tmsb10.5	3.84703e-144	-0.754007	1	1	3.77316e-140	8	Tmsb10
Rora.3	3.31743e-143	0.822856	0.576	0.164	3.25374e-139	8	Rora
Rps24.3	1.70705e-140	-0.570202	1	1	1.67428e-136	8	Rps24
mt-Co1.4	7.27084e-136	0.66664	1	1	7.13124e-132	8	mt-Co1
Pim1.5	1.12507e-133	1.07094	0.826	0.468	1.10347e-129	8	Pim1
Rps3.3	1.30613e-133	-0.578641	1	1	1.28105e-129	8	Rps3
Rps16.3	3.10692e-132	-0.558036	1	1	3.04727e-128	8	Rps16
Rpl13.3	1.8974e-128	-0.550331	1	1	1.86097e-124	8	Rpl13
Rps10.3	7.23114e-127	-0.526824	1	1	7.0923e-123	8	Rps10
Rpl18a.2	9.35727e-125	-0.493964	1	1	9.17761e-121	8	Rpl18a
Rpl32.3	3.74048e-122	-0.551351	1	1	3.66866e-118	8	Rpl32
Rps5.4	5.15475e-119	-0.528086	1	1	5.05578e-115	8	Rps5
Nfkbia.5	1.05323e-117	0.879115	0.957	0.637	1.03301e-113	8	Nfkbia
Rps4x.3	3.22234e-112	-0.521272	1	1	3.16047e-108	8	Rps4x
Rpl10-ps3.4	5.38996e-107	-0.689055	0.976	0.988	5.28648e-103	8	Rpl10-ps3
Rpl11.3	9.15265e-102	-0.440924	1	1	8.97692e-98	8	Rpl11
Rpl13a.1	1.11309e-100	-0.439309	1	1	1.09172e-96	8	Rpl13a
Rps7.3	1.51267e-100	-0.48636	1	1	1.48363e-96	8	Rps7
Fau	9.27982e-95	-0.358338	1	1	9.10165e-91	8	Fau
Rplp0.5	3.64504e-93	-0.54623	1	1	3.57505e-89	8	Rplp0
Tnfaip3.3	5.50476e-90	0.693427	0.976	0.84	5.39907e-86	8	Tnfaip3
Rpl18.3	6.81278e-90	-0.409023	1	1	6.68198e-86	8	Rpl18
Rpl14.3	4.82042e-89	-0.520059	0.994	0.996	4.72787e-85	8	Rpl14
Rpl8.3	8.3824e-87	-0.460679	0.996	0.999	8.22146e-83	8	Rpl8
Junb.6	3.74952e-86	0.678524	1	0.958	3.67753e-82	8	Junb
Bhlhe40.3	1.28428e-83	0.793191	0.6	0.272	1.25962e-79	8	Bhlhe40
Rpl21.4	2.61126e-83	-0.458612	1	0.999	2.56112e-79	8	Rpl21
Ppia.2	3.71824e-83	-0.46353	0.992	0.999	3.64685e-79	8	Ppia
Rpl26.4	1.07679e-82	-0.44119	1	0.999	1.05612e-78	8	Rpl26
mt-Co3.3	1.41251e-81	0.491206	0.996	0.998	1.38539e-77	8	mt-Co3
Rps2.4	2.53643e-81	-0.461463	0.998	1	2.48773e-77	8	Rps2
Rpl34	5.95316e-80	-0.318307	1	1	5.83886e-76	8	Rpl34
Rpl10a.4	2.6189e-79	-0.458672	0.996	0.998	2.56862e-75	8	Rpl10a
Rpl15.5	3.62025e-78	-0.480004	0.992	0.996	3.55074e-74	8	Rpl15
Klf10	1.0572e-75	0.381104	0.308	0.074	1.0369e-71	8	Klf10
Jund.4	1.75478e-74	0.650139	0.992	0.938	1.72109e-70	8	Jund
Rpl36.1	8.45247e-73	-0.323251	1	1	8.29019e-69	8	Rpl36
Areg.1	1.92255e-71	0.33306	0.158	0.02	1.88563e-67	8	Areg
Gadd45b.1	2.32233e-71	0.732858	0.489	0.196	2.27774e-67	8	Gadd45b
Rpl35.4	7.71978e-71	-0.466184	1	0.999	7.57156e-67	8	Rpl35
Rpl28.5	1.58891e-69	-0.440478	1	0.999	1.55841e-65	8	Rpl28
Pfn1.7	6.27422e-68	-0.664468	0.982	0.97	6.15375e-64	8	Pfn1
mt-Atp6.2	9.05678e-67	0.489269	0.998	0.978	8.88289e-63	8	mt-Atp6
Btg1.4	9.51619e-67	0.52754	0.988	0.952	9.33348e-63	8	Btg1
Rps11.2	2.09122e-66	-0.35954	0.998	1	2.05107e-62	8	Rps11
Cd44	5.37467e-66	0.532021	0.434	0.165	5.27148e-62	8	Cd44
Maf.1	3.59716e-65	0.392655	0.308	0.083	3.5281e-61	8	Maf
Rps18.2	1.63908e-63	-0.387757	1	0.999	1.60761e-59	8	Rps18
Rpl29.6	2.17055e-62	-0.82812	0.901	0.872	2.12887e-58	8	Rpl29
Ndufa3.1	1.08548e-61	-0.429775	0.164	0.603	1.06464e-57	8	Ndufa3
Ost4.1	1.48109e-61	-0.437559	0.168	0.599	1.45266e-57	8	Ost4
Kdm6b.2	4.60998e-61	0.579006	0.517	0.247	4.52147e-57	8	Kdm6b
mt-Nd4.4	8.87468e-61	0.520034	0.99	0.876	8.70429e-57	8	mt-Nd4
Rpl12.4	1.85596e-60	-0.394352	1	0.996	1.82032e-56	8	Rpl12
Rpl27	5.49392e-59	-0.29073	1	1	5.38844e-55	8	Rpl27
Cd8b1.6	1.49362e-58	-0.790323	0.057	0.437	1.46494e-54	8	Cd8b1
Cish	1.74627e-58	0.460298	0.355	0.12	1.71274e-54	8	Cish
Sumo2.3	3.61465e-58	-0.425104	0.158	0.576	3.54525e-54	8	Sumo2
Naca.2	6.13411e-57	-0.389657	0.982	0.975	6.01634e-53	8	Naca
Rpl24.2	7.99688e-57	-0.327746	1	0.999	7.84334e-53	8	Rpl24
Lmna	1.15844e-56	0.344663	0.223	0.051	1.1362e-52	8	Lmna
mt-Nd1.2	4.26358e-56	0.438049	0.992	0.972	4.18172e-52	8	mt-Nd1
mt-Co2	1.20206e-52	0.32981	0.998	1	1.17898e-48	8	mt-Co2
Trmt112.1	1.52396e-52	-0.384146	0.138	0.523	1.4947e-48	8	Trmt112
Gstp1.1	2.84937e-52	-0.408719	0.154	0.544	2.79466e-48	8	Gstp1
Hspa5.3	3.24885e-52	0.518593	0.773	0.612	3.18647e-48	8	Hspa5
Nop10.1	5.04721e-52	-0.391874	0.132	0.517	4.95031e-48	8	Nop10
Ppib.2	1.08694e-51	-0.387884	0.191	0.595	1.06607e-47	8	Ppib
S100a4.8	2.55097e-51	0.636181	0.465	0.205	2.50199e-47	8	S100a4
Rpl3.2	3.21107e-51	-0.333677	0.998	0.998	3.14942e-47	8	Rpl3
Fus.5	6.2768e-51	0.570094	0.688	0.502	6.15628e-47	8	Fus
Rpl37a.5	1.49652e-50	0.269054	1	1	1.46779e-46	8	Rpl37a
Rpl36al.1	2.39654e-50	-0.33031	0.961	0.964	2.35053e-46	8	Rpl36al
Rpl23.3	1.30279e-49	-0.276553	1	1	1.27777e-45	8	Rpl23
Ndufa13.4	1.6948e-49	-0.386104	0.211	0.603	1.66226e-45	8	Ndufa13
Eef1a1.3	3.57772e-49	-0.271299	1	1	3.50903e-45	8	Eef1a1
Cox8a.4	4.50877e-49	-0.394708	0.888	0.89	4.4222e-45	8	Cox8a
Csrnp1	6.08132e-49	0.440997	0.473	0.23	5.96456e-45	8	Csrnp1
Tnfrsf4.1	1.38431e-48	0.402425	0.227	0.059	1.35773e-44	8	Tnfrsf4
Ms4a6b.1	2.49229e-48	-0.386638	0.174	0.563	2.44444e-44	8	Ms4a6b
Edf1.2	2.20001e-47	-0.345574	0.142	0.518	2.15777e-43	8	Edf1
Eef2.2	2.22255e-47	-0.362431	0.982	0.965	2.17988e-43	8	Eef2
Ypel3.3	5.77451e-47	-0.37429	0.166	0.548	5.66364e-43	8	Ypel3
Snrpf.2	1.00501e-46	-0.358788	0.164	0.537	9.85713e-43	8	Snrpf
Ptpn18.2	1.27146e-46	-0.348407	0.903	0.919	1.24704e-42	8	Ptpn18
Tra2b.4	3.63782e-46	0.399497	0.947	0.769	3.56797e-42	8	Tra2b
Atf3	3.88301e-46	0.261985	0.219	0.057	3.80846e-42	8	Atf3
Cdkn1a	9.97216e-46	0.288149	0.195	0.047	9.78069e-42	8	Cdkn1a
Park7.1	1.26793e-45	-0.333584	0.089	0.424	1.24359e-41	8	Park7
Rps3a1.4	7.31749e-45	-0.26704	1	1	7.17699e-41	8	Rps3a1
Atp5c1.1	8.69528e-45	-0.345117	0.16	0.519	8.52833e-41	8	Atp5c1
mt-Nd4l.2	1.76917e-44	-0.349313	0.998	0.984	1.7352e-40	8	mt-Nd4l
Rpl41.5	1.98669e-44	0.346034	1	0.991	1.94854e-40	8	Rpl41
Cd52.6	2.39091e-44	-0.629458	0.98	0.96	2.34501e-40	8	Cd52
Ctla4.4	3.63687e-44	0.53708	0.434	0.204	3.56704e-40	8	Ctla4
Epsti1.2	3.8424e-44	-0.381684	0.075	0.404	3.76862e-40	8	Epsti1
S100a6.6	4.76354e-44	0.363037	0.773	0.418	4.67208e-40	8	S100a6
Atp5j.1	8.48041e-44	-0.348665	0.219	0.597	8.31758e-40	8	Atp5j
Nfkbiz	1.06585e-43	0.460487	0.456	0.228	1.04539e-39	8	Nfkbiz
Ccnl1.2	1.16629e-43	0.510118	0.653	0.476	1.14389e-39	8	Ccnl1
Nme2.4	1.67785e-43	-0.438985	0.74	0.795	1.64564e-39	8	Nme2
Ndufa7.1	2.23157e-43	-0.335167	0.174	0.539	2.18872e-39	8	Ndufa7
Cd8a.5	5.36666e-43	-0.559635	0.049	0.358	5.26362e-39	8	Cd8a
Gm8369.3	8.50677e-42	-0.389352	0.108	0.437	8.34344e-38	8	Gm8369
Eef1b2.3	1.08683e-41	-0.340055	0.996	0.981	1.06596e-37	8	Eef1b2
Pfdn5.1	1.98419e-41	-0.321911	0.838	0.878	1.9461e-37	8	Pfdn5
Cox5b.3	7.63671e-41	-0.353454	0.262	0.615	7.49009e-37	8	Cox5b
Ikzf2.1	9.9084e-41	0.33767	0.235	0.071	9.71815e-37	8	Ikzf2
Psmb8.3	1.08022e-40	-0.411156	0.365	0.649	1.05948e-36	8	Psmb8
Ctsw.5	5.81647e-40	-0.39635	0.083	0.394	5.70479e-36	8	Ctsw
mt-Nd2.2	6.78162e-40	0.368516	0.988	0.949	6.65141e-36	8	mt-Nd2
Cd37.2	9.37647e-40	-0.300267	0.108	0.443	9.19644e-36	8	Cd37
Grcc10.1	2.84649e-39	-0.351373	0.357	0.668	2.79184e-35	8	Grcc10
Tmem258.1	4.07471e-39	-0.307626	0.156	0.484	3.99647e-35	8	Tmem258
Dnajc15.2	4.67123e-39	-0.336607	0.077	0.378	4.58155e-35	8	Dnajc15
Eno1.3	5.18479e-39	-0.339851	0.187	0.524	5.08524e-35	8	Eno1
Gimap4.4	5.26638e-39	-0.38885	0.183	0.522	5.16526e-35	8	Gimap4
Cox6b1.3	8.62257e-39	-0.315652	0.223	0.586	8.45702e-35	8	Cox6b1
Rps19.6	1.02515e-38	-0.331888	1	1	1.00547e-34	8	Rps19
Nr4a3	1.12007e-38	0.318397	0.296	0.111	1.09856e-34	8	Nr4a3
Sept1.2	1.38317e-38	-0.337761	0.221	0.577	1.35661e-34	8	Sept1
Klk8.1	1.77692e-38	-0.307152	0.073	0.374	1.7428e-34	8	Klk8
Cd7.6	1.99611e-38	-0.697108	0.037	0.316	1.95778e-34	8	Cd7
Eef1d.1	2.16328e-38	-0.34284	0.4	0.681	2.12175e-34	8	Eef1d
Ppp1ca.2	2.39294e-38	-0.327122	0.201	0.551	2.34699e-34	8	Ppp1ca
Elob.1	3.63347e-38	-0.347711	0.349	0.656	3.56371e-34	8	Elob
Atp5d.2	5.69802e-38	-0.303362	0.235	0.601	5.58862e-34	8	Atp5d
Rabac1.1	9.91395e-38	-0.297033	0.191	0.544	9.7236e-34	8	Rabac1
Sap18.1	1.33217e-37	-0.297898	0.138	0.465	1.30659e-33	8	Sap18
Psme2.1	2.03621e-37	-0.286229	0.227	0.583	1.99711e-33	8	Psme2
Limd2.3	2.42618e-37	-0.38114	0.686	0.784	2.37959e-33	8	Limd2
Rpl36a.5	3.57054e-37	-0.320177	1	0.997	3.50199e-33	8	Rpl36a
Klf6.2	6.67174e-37	0.465411	0.913	0.742	6.54365e-33	8	Klf6
Zc3h12a	8.75322e-37	0.404633	0.444	0.242	8.58516e-33	8	Zc3h12a
Laptm5.2	1.01124e-36	0.350773	0.959	0.818	9.91827e-33	8	Laptm5
Eif3k.1	1.45412e-36	-0.327422	0.353	0.662	1.4262e-32	8	Eif3k
Hif1a.1	1.59786e-36	0.463439	0.475	0.273	1.56718e-32	8	Hif1a
Gpsm3.2	2.30608e-36	-0.289348	0.138	0.454	2.26181e-32	8	Gpsm3
Rps8.6	2.33454e-36	-0.275372	1	1	2.28971e-32	8	Rps8
Cox7b.1	2.93835e-36	-0.290774	0.193	0.524	2.88194e-32	8	Cox7b
Clic1.6	5.24401e-36	-0.336887	0.231	0.574	5.14333e-32	8	Clic1
Fis1.1	6.41536e-36	-0.285255	0.164	0.498	6.29219e-32	8	Fis1
Clk1.4	1.10703e-35	0.487273	0.675	0.55	1.08578e-31	8	Clk1
D8Ertd738e.1	1.84586e-35	-0.289659	0.201	0.543	1.81042e-31	8	D8Ertd738e
Gabarapl2.2	2.0479e-35	-0.29743	0.156	0.467	2.00858e-31	8	Gabarapl2
Cd3g.5	2.08058e-35	-0.402538	0.884	0.866	2.04063e-31	8	Cd3g
2410015M20Rik.1	2.32491e-35	-0.27527	0.083	0.368	2.28027e-31	8	2410015M20Rik
Gmfg.2	2.60313e-35	-0.323165	0.26	0.598	2.55315e-31	8	Gmfg
Nedd8.1	2.64625e-35	-0.279717	0.122	0.421	2.59544e-31	8	Nedd8
Atp6v0c.1	3.69158e-35	-0.26884	0.059	0.332	3.6207e-31	8	Atp6v0c
Sod1.1	3.76145e-35	0.393356	0.479	0.275	3.68923e-31	8	Sod1
Nfkbid	5.74038e-35	0.391284	0.28	0.108	5.63016e-31	8	Nfkbid
Arhgdib.3	6.82313e-35	-0.359356	0.842	0.848	6.69213e-31	8	Arhgdib
Ly6a.5	1.65861e-34	-0.393955	0.189	0.494	1.62677e-30	8	Ly6a
Ptp4a2.1	1.67598e-34	0.42998	0.59	0.438	1.6438e-30	8	Ptp4a2
H2afj.1	2.60048e-34	-0.334266	0.389	0.67	2.55055e-30	8	H2afj
Mif.1	3.76875e-34	-0.260162	0.213	0.549	3.69639e-30	8	Mif
Bloc1s1.1	4.04682e-34	-0.267635	0.073	0.345	3.96912e-30	8	Bloc1s1
Lamtor2.1	7.91742e-34	-0.269021	0.105	0.388	7.76541e-30	8	Lamtor2
Nrip1	8.95247e-34	0.412062	0.371	0.182	8.78058e-30	8	Nrip1
Vps28.1	1.08019e-33	-0.272943	0.12	0.419	1.05945e-29	8	Vps28
Psmb9.2	1.08658e-33	-0.283404	0.122	0.414	1.06572e-29	8	Psmb9
Psenen.1	1.86906e-33	-0.279725	0.134	0.425	1.83317e-29	8	Psenen
Ddx5.1	2.1092e-33	0.321751	0.998	0.935	2.0687e-29	8	Ddx5
Ndufb4.1	2.23272e-33	-0.261843	0.097	0.376	2.18985e-29	8	Ndufb4
Rpl4.2	2.68164e-33	-0.285019	0.986	0.966	2.63015e-29	8	Rpl4
Lsm4	3.37077e-33	-0.267913	0.136	0.435	3.30605e-29	8	Lsm4
Snu13.1	6.42497e-33	-0.273888	0.178	0.492	6.30161e-29	8	Snu13
Rnaset2a.1	6.88139e-33	-0.27089	0.108	0.387	6.74927e-29	8	Rnaset2a
Uqcr10.1	7.34198e-33	-0.26059	0.174	0.493	7.20101e-29	8	Uqcr10
Tbca.1	8.7488e-33	-0.262119	0.217	0.545	8.58082e-29	8	Tbca
Nfkb1	9.42398e-33	0.397191	0.416	0.226	9.24304e-29	8	Nfkb1
Psmb3.1	1.1613e-32	-0.277152	0.136	0.421	1.13901e-28	8	Psmb3
Sri.1	1.44424e-32	-0.270238	0.128	0.422	1.41651e-28	8	Sri
Supt4a.1	1.61535e-32	-0.279421	0.142	0.434	1.58434e-28	8	Supt4a
Lef1.6	1.91429e-32	-0.317235	0.112	0.397	1.87754e-28	8	Lef1
Ube2i.1	2.30849e-32	-0.253047	0.116	0.408	2.26417e-28	8	Ube2i
Arpp19	4.15077e-32	-0.254204	0.183	0.495	4.07108e-28	8	Arpp19
Gapdh.3	4.63507e-32	-0.324551	0.957	0.925	4.54608e-28	8	Gapdh
Rnf187.1	5.77773e-32	-0.261011	0.095	0.37	5.66679e-28	8	Rnf187
Atp2b1	8.24452e-32	0.41564	0.446	0.261	8.08622e-28	8	Atp2b1
Malat1.4	9.55843e-32	0.496805	0.994	0.976	9.3749e-28	8	Malat1
Arl6ip5.1	1.32605e-31	-0.26673	0.154	0.454	1.30059e-27	8	Arl6ip5
Gpx4.1	1.40821e-31	-0.284469	0.187	0.495	1.38117e-27	8	Gpx4
Cd3d.2	1.70127e-31	-0.283454	0.905	0.913	1.6686e-27	8	Cd3d
Cox7a2l	1.97205e-31	-0.285043	0.3	0.627	1.93419e-27	8	Cox7a2l
Eif3i.1	1.98802e-31	-0.264652	0.156	0.447	1.94985e-27	8	Eif3i
Ly6c2.5	2.61665e-31	-0.640609	0.024	0.257	2.56641e-27	8	Ly6c2
Gabarap.1	5.18122e-31	-0.267143	0.195	0.503	5.08174e-27	8	Gabarap
Mrpl23	5.92715e-31	-0.25503	0.075	0.33	5.81335e-27	8	Mrpl23
Skap1.2	6.19308e-31	-0.269615	0.213	0.53	6.07417e-27	8	Skap1
Atp6v0e.1	6.56224e-31	-0.264079	0.162	0.455	6.43625e-27	8	Atp6v0e
Hmgn2.1	6.84195e-31	-0.287611	0.126	0.407	6.71059e-27	8	Hmgn2
Rps20.7	1.16428e-30	-0.348159	1	1	1.14193e-26	8	Rps20
Crip1.5	1.23521e-30	0.4284	0.994	0.925	1.21149e-26	8	Crip1
Myl12b.1	1.40727e-30	-0.310421	0.801	0.837	1.38025e-26	8	Myl12b
Rac2.6	1.42224e-30	-0.335995	0.959	0.93	1.39493e-26	8	Rac2
Gng5.2	1.85174e-30	-0.304593	0.371	0.655	1.81619e-26	8	Gng5
Tubb5.1	2.58129e-30	-0.261594	0.195	0.5	2.53173e-26	8	Tubb5
Bin2.2	2.77809e-30	-0.26839	0.15	0.429	2.72475e-26	8	Bin2
Clta.1	4.54416e-30	-0.25811	0.229	0.549	4.45691e-26	8	Clta
Skil	8.82416e-30	0.294854	0.3	0.132	8.65473e-26	8	Skil
Ccnd3.2	1.11755e-29	-0.275663	0.132	0.408	1.09609e-25	8	Ccnd3
Ifrd1.1	1.19358e-29	0.450194	0.452	0.283	1.17066e-25	8	Ifrd1
Klf3.2	1.21629e-29	-0.286796	0.118	0.391	1.19293e-25	8	Klf3
Abracl.3	1.40282e-29	-0.272204	0.195	0.496	1.37589e-25	8	Abracl
Irf2bp2	1.74322e-29	0.362235	0.373	0.199	1.70975e-25	8	Irf2bp2
Ndufa6	3.47755e-29	-0.273276	0.404	0.677	3.41078e-25	8	Ndufa6
Krtcap2.2	5.31649e-29	-0.270038	0.237	0.55	5.21441e-25	8	Krtcap2
Gtf2i	5.67189e-29	-0.252118	0.081	0.333	5.56299e-25	8	Gtf2i
Ccr7.7	9.16331e-29	-0.444061	0.207	0.478	8.98737e-25	8	Ccr7
Gimap3.3	1.09343e-28	-0.2731	0.266	0.589	1.07243e-24	8	Gimap3
Gimap6.2	1.16091e-28	-0.335677	0.785	0.817	1.13862e-24	8	Gimap6
Emp3.5	1.16139e-28	-0.33188	0.178	0.459	1.13909e-24	8	Emp3
Klrd1.5	1.72897e-28	-0.373435	0.034	0.257	1.69577e-24	8	Klrd1
Nr4a1.6	1.87609e-28	0.530339	0.485	0.309	1.84007e-24	8	Nr4a1
Ms4a4b.5	2.32621e-28	-0.411266	0.418	0.629	2.28155e-24	8	Ms4a4b
Gm8797.5	2.9459e-28	-0.317711	0.071	0.308	2.88934e-24	8	Gm8797
Odc1	4.07712e-28	0.554884	0.477	0.323	3.99884e-24	8	Odc1
Npm1.2	8.84089e-28	-0.280277	0.927	0.897	8.67114e-24	8	Npm1
Gpr132.3	2.08871e-27	0.414026	0.55	0.411	2.0486e-23	8	Gpr132
H2-T22.1	6.02035e-27	-0.255889	0.185	0.467	5.90476e-23	8	H2-T22
Map2k3	6.07124e-27	0.250859	0.241	0.098	5.95467e-23	8	Map2k3
Psme1.1	6.6239e-27	-0.288642	0.414	0.667	6.49672e-23	8	Psme1
Cnn2.2	9.51329e-27	-0.302243	0.298	0.587	9.33064e-23	8	Cnn2
Eif3h.2	1.08903e-26	-0.277527	0.507	0.708	1.06812e-22	8	Eif3h
Aebp2	1.14318e-26	0.303337	0.329	0.162	1.12123e-22	8	Aebp2
Hint1.2	1.99975e-26	-0.270372	0.314	0.615	1.96136e-22	8	Hint1
Slc38a2	3.99174e-26	0.4124	0.495	0.344	3.9151e-22	8	Slc38a2
Selenow.1	7.13007e-26	-0.281748	0.592	0.746	6.99317e-22	8	Selenow
Hspe1	1.23894e-25	-0.259047	0.335	0.618	1.21515e-21	8	Hspe1
Ahnak.5	2.96234e-25	0.353386	0.556	0.391	2.90546e-21	8	Ahnak
Rpl22l1.1	4.31535e-25	-0.256491	0.982	0.946	4.2325e-21	8	Rpl22l1
Fxyd5.4	5.32548e-25	-0.262799	0.919	0.888	5.22323e-21	8	Fxyd5
Sh3bgrl3.6	5.81222e-25	-0.386269	0.905	0.85	5.70063e-21	8	Sh3bgrl3
Igfbp4.7	8.54986e-25	-0.458681	0.032	0.231	8.3857e-21	8	Igfbp4
Cxcl2	8.82281e-25	0.309876	0.126	0.034	8.65342e-21	8	Cxcl2
Rgs10.5	9.28361e-24	-0.254133	0.126	0.363	9.10536e-20	8	Rgs10
Sell.4	9.48507e-24	-0.251771	0.075	0.287	9.30296e-20	8	Sell
Dusp1.5	1.23315e-23	0.330184	0.909	0.745	1.20948e-19	8	Dusp1
Atp5g2.1	1.24879e-23	-0.258703	0.69	0.793	1.22482e-19	8	Atp5g2
Atp5j2.2	1.5268e-23	-0.269871	0.505	0.703	1.49749e-19	8	Atp5j2
Cd28.3	1.83051e-23	0.480212	0.609	0.546	1.79537e-19	8	Cd28
Kdm2b	2.70818e-23	0.311211	0.27	0.127	2.65618e-19	8	Kdm2b
Tob2.1	4.86792e-23	0.392818	0.379	0.225	4.77445e-19	8	Tob2
Plk3	9.05286e-23	0.282153	0.278	0.134	8.87905e-19	8	Plk3
Rbm39.2	1.16073e-22	0.267531	0.98	0.907	1.13845e-18	8	Rbm39
Snx18	2.46065e-22	0.264451	0.247	0.112	2.41341e-18	8	Snx18
Hnrnpa0.1	2.85132e-22	0.326517	0.465	0.317	2.79658e-18	8	Hnrnpa0
S100a11.7	5.01657e-22	-0.363488	0.231	0.482	4.92025e-18	8	S100a11
Rel	5.04919e-22	0.287797	0.3	0.155	4.95224e-18	8	Rel
Gm47283.2	7.1314e-22	0.404185	0.436	0.3	6.99448e-18	8	Gm47283
Hcst.5	3.71898e-21	-0.318999	0.905	0.864	3.64757e-17	8	Hcst
Fosl2	5.25916e-21	0.325549	0.316	0.172	5.15818e-17	8	Fosl2
Rnf19b	1.47061e-20	0.25063	0.252	0.118	1.44238e-16	8	Rnf19b
Gm11808.1	1.81548e-20	0.266513	0.359	0.202	1.78063e-16	8	Gm11808
Plac8.2	2.83445e-20	-0.271005	0.105	0.31	2.78003e-16	8	Plac8
Per1.1	4.26362e-20	0.322579	0.452	0.318	4.18176e-16	8	Per1
Il2rb.3	4.75506e-20	0.337836	0.525	0.383	4.66376e-16	8	Il2rb
Ubc.2	1.20726e-19	0.250187	0.919	0.791	1.18408e-15	8	Ubc
Rgs2.3	1.32396e-19	0.445012	0.511	0.387	1.29854e-15	8	Rgs2
Ddx3x.1	1.55444e-19	0.340909	0.473	0.351	1.5246e-15	8	Ddx3x
Dapl1.3	2.50037e-19	-0.263854	0.012	0.163	2.45237e-15	8	Dapl1
Zfp36l1.2	4.16591e-19	0.41331	0.511	0.407	4.08592e-15	8	Zfp36l1
Irs2.1	4.70408e-19	0.323061	0.296	0.16	4.61376e-15	8	Irs2
Icos.1	4.91102e-19	0.305131	0.363	0.219	4.81673e-15	8	Icos
Klf2.3	1.09297e-18	-0.359629	0.921	0.849	1.07198e-14	8	Klf2
Zfp36l2.3	1.15535e-18	0.281689	0.927	0.799	1.13316e-14	8	Zfp36l2
Gata3	2.03134e-18	0.337194	0.302	0.17	1.99234e-14	8	Gata3
Ccl4.7	5.69447e-18	-0.81784	0.069	0.234	5.58514e-14	8	Ccl4
Purb	2.56307e-17	0.271109	0.308	0.178	2.51386e-13	8	Purb
Xist.5	1.82589e-15	-0.252504	0.043	0.184	1.79083e-11	8	Xist
Ier5.2	2.27573e-15	0.378866	0.546	0.492	2.23203e-11	8	Ier5
Serinc3	7.6715e-15	0.275605	0.351	0.236	7.5242e-11	8	Serinc3
Gzmb.6	8.61734e-15	-0.482868	0.065	0.208	8.45189e-11	8	Gzmb
Cyba.6	1.17301e-14	-0.270941	0.55	0.669	1.15049e-10	8	Cyba
Gna13.2	5.56613e-14	0.301071	0.497	0.413	5.45926e-10	8	Gna13
Zc3hav1.3	1.95448e-13	0.316437	0.527	0.475	1.91696e-09	8	Zc3hav1
Ly6e.5	2.49179e-13	-0.318578	0.631	0.68	2.44394e-09	8	Ly6e
Lars2.3	2.98542e-13	-0.628113	0.947	0.866	2.9281e-09	8	Lars2
AY036118.2	9.00974e-13	-0.56781	0.933	0.845	8.83676e-09	8	AY036118
Rgs1.6	1.55768e-12	0.259686	0.521	0.415	1.52778e-08	8	Rgs1
Atf4.1	2.02817e-12	0.284326	0.513	0.454	1.98923e-08	8	Atf4
Smad7.3	3.33028e-12	0.309852	0.491	0.421	3.26634e-08	8	Smad7
Akap13	6.85862e-12	0.298618	0.566	0.551	6.72694e-08	8	Akap13
Fosb.2	7.52067e-12	0.377756	0.491	0.413	7.37627e-08	8	Fosb
Id2.6	1.06822e-11	0.370786	0.519	0.433	1.04771e-07	8	Id2
Wnk1	2.69936e-11	0.323585	0.422	0.348	2.64753e-07	8	Wnk1
Malt1	8.20759e-11	0.250476	0.341	0.242	8.05e-07	8	Malt1
Ythdc1.1	1.17514e-10	0.274801	0.485	0.432	1.15257e-06	8	Ythdc1
Nkg7.7	1.47755e-10	-0.7925	0.734	0.617	1.44918e-06	8	Nkg7
Hnrnph1.1	1.77333e-09	0.293658	0.448	0.395	1.73929e-05	8	Hnrnph1
Trbv1.7	1.20218e-08	-0.486496	0.034	0.116	0.00011791	8	Trbv1
Gzma.7	3.6847e-08	-0.921376	0.055	0.139	0.000361395	8	Gzma
Hsp90b1	1.72955e-07	0.29421	0.469	0.441	0.00169634	8	Hsp90b1
Hsp90aa1	2.01028e-06	0.265007	0.509	0.522	0.0197168	8	Hsp90aa1
Lgals1.7	1.21068e-05	-0.30337	0.341	0.447	0.118743	8	Lgals1
Gm42418.4	7.62801e-278	1.71254	1	1	7.48155e-274	9	Gm42418
Lars2.4	8.99835e-64	1.16765	0.967	0.865	8.82558e-60	9	Lars2
Tmsb4x.8	7.58528e-43	-0.373737	1	1	7.43964e-39	9	Tmsb4x
Ccl5.8	1.69186e-40	-1.79996	0.371	0.659	1.65937e-36	9	Ccl5
Gm26917.4	8.06728e-36	0.642082	0.701	0.455	7.91239e-32	9	Gm26917
AW112010.7	7.86948e-33	-0.563065	0.586	0.786	7.71838e-29	9	AW112010
Cd52.7	1.10029e-31	-0.493564	0.898	0.965	1.07917e-27	9	Cd52
Nkg7.8	2.57445e-29	-0.758989	0.434	0.636	2.52502e-25	9	Nkg7
Pfn1.8	1.40644e-28	-0.413121	0.906	0.975	1.37944e-24	9	Pfn1
Actb.7	2.14441e-28	-0.356616	0.957	0.987	2.10324e-24	9	Actb
H2-K1.2	1.88786e-25	-0.286786	0.955	0.984	1.85162e-21	9	H2-K1
Sh3bgrl3.7	7.72865e-24	-0.350156	0.736	0.861	7.58026e-20	9	Sh3bgrl3
Myl6.4	1.22175e-21	-0.252072	0.857	0.932	1.19829e-17	9	Myl6
S100a6.7	7.36123e-21	-0.604535	0.242	0.451	7.21989e-17	9	S100a6
Cyba.7	6.29956e-20	-0.32807	0.508	0.671	6.1786e-16	9	Cyba
Hcst.6	1.31951e-18	-0.288237	0.801	0.87	1.29417e-14	9	Hcst
Ccl4.8	1.19219e-16	-0.907835	0.078	0.233	1.1693e-12	9	Ccl4
S100a10.7	2.5304e-16	-0.345251	0.656	0.775	2.48182e-12	9	S100a10
Rac2.7	6.58744e-16	-0.257746	0.883	0.934	6.46096e-12	9	Rac2
Thy1.5	8.95565e-16	-0.28568	0.381	0.551	8.7837e-12	9	Thy1
Gzmb.7	4.34062e-15	-0.484779	0.064	0.208	4.25728e-11	9	Gzmb
Gapdh.4	4.75408e-15	-0.258927	0.861	0.931	4.66281e-11	9	Gapdh
Actg1.5	1.17107e-14	-0.255569	0.916	0.951	1.14859e-10	9	Actg1
Lgals1.8	4.81005e-14	-0.517766	0.299	0.449	4.7177e-10	9	Lgals1
Ptprcap.6	5.57564e-14	-0.255699	0.527	0.638	5.46859e-10	9	Ptprcap
Id2.7	4.11309e-13	-0.315255	0.301	0.447	4.03411e-09	9	Id2
Ms4a4b.6	5.41888e-13	-0.299832	0.51	0.623	5.31484e-09	9	Ms4a4b
Dusp2.5	2.01038e-12	-0.358884	0.439	0.57	1.97178e-08	9	Dusp2
S100a11.8	8.35342e-11	-0.278573	0.346	0.475	8.19304e-07	9	S100a11
Gzma.8	4.78273e-10	-0.962997	0.043	0.14	4.6909e-06	9	Gzma
Rgs1.7	6.66966e-10	-0.366999	0.303	0.429	6.54161e-06	9	Rgs1
Cd8a.6	6.99869e-08	-0.299423	0.25	0.345	0.000686431	9	Cd8a
Ly6c2.6	3.58672e-06	-0.342622	0.164	0.249	0.0351786	9	Ly6c2
Cd7.7	4.56124e-06	-0.441999	0.227	0.304	0.0447366	9	Cd7
Cd8b1.7	1.04588e-05	-0.2701	0.346	0.419	0.10258	9	Cd8b1
Egr1.8	3.05095e-05	-0.431065	0.225	0.298	0.299237	9	Egr1
Cd7.8	0	1.63754	0.965	0.264	0	10	Cd7
Gzmb.8	0	1.62068	0.852	0.164	0	10	Gzmb
Cd160.1	0	0.746701	0.683	0.088	0	10	Cd160
Ccdc136	0	0.45753	0.383	0.01	0	10	Ccdc136
Itga1	5.8411e-283	0.501647	0.533	0.054	5.72896e-279	10	Itga1
Xcl1.6	6.05565e-253	0.83342	0.721	0.121	5.93938e-249	10	Xcl1
Cd8a.7	1.5335e-225	1.19666	0.904	0.309	1.50405e-221	10	Cd8a
Atp8a2	1.67689e-223	0.314177	0.317	0.021	1.6447e-219	10	Atp8a2
Rcbtb2.2	6.04638e-208	0.757727	0.718	0.154	5.93029e-204	10	Rcbtb2
Rgs1.8	7.82944e-184	1.28078	0.93	0.394	7.67911e-180	10	Rgs1
Ccl4.9	1.08665e-173	1.23334	0.758	0.195	1.06579e-169	10	Ccl4
Actn2	4.87945e-173	0.499619	0.523	0.091	4.78576e-169	10	Actn2
Ifng.6	7.95608e-173	0.797935	0.707	0.172	7.80332e-169	10	Ifng
Jaml	2.9658e-159	0.408832	0.43	0.064	2.90885e-155	10	Jaml
Efhd2	3.22601e-133	0.578181	0.721	0.233	3.16407e-129	10	Efhd2
Gm8797.6	6.39907e-133	0.630877	0.782	0.268	6.27621e-129	10	Gm8797
Fth1.2	2.83239e-130	0.572989	1	0.993	2.77801e-126	10	Fth1
Trbv14	9.44094e-128	0.489478	0.204	0.016	9.25967e-124	10	Trbv14
Serpina3g	2.27283e-118	0.371141	0.39	0.069	2.22919e-114	10	Serpina3g
Gapdh.5	7.26383e-118	0.640243	0.993	0.924	7.12437e-114	10	Gapdh
Ccl5.9	6.48262e-116	0.443771	1	0.623	6.35815e-112	10	Ccl5
Rpl35a.5	3.14664e-115	-0.765282	0.981	0.995	3.08622e-111	10	Rpl35a
Fgl2	1.28601e-111	0.351662	0.385	0.071	1.26131e-107	10	Fgl2
AW112010.8	2.10167e-111	0.697908	0.993	0.762	2.06132e-107	10	AW112010
Dtx1	2.68046e-111	0.421048	0.516	0.129	2.629e-107	10	Dtx1
Ly6a.6	1.46836e-110	0.826501	0.887	0.454	1.44017e-106	10	Ly6a
Chn2	3.37729e-107	0.270951	0.312	0.049	3.31244e-103	10	Chn2
Rac2.8	7.30818e-101	0.544912	0.991	0.928	7.16786e-97	10	Rac2
Nkg7.9	6.89447e-99	0.590269	0.984	0.605	6.76209e-95	10	Nkg7
Rps19.7	4.18092e-97	-0.629633	1	1	4.10064e-93	10	Rps19
Rpl30.2	5.63825e-94	-0.404986	1	1	5.52999e-90	10	Rpl30
Rps27a.5	1.57265e-93	-0.44676	1	1	1.54246e-89	10	Rps27a
H2-D1.3	3.72435e-92	0.482174	1	0.993	3.65284e-88	10	H2-D1
Rps26.4	4.99109e-92	-0.531882	1	0.999	4.89526e-88	10	Rps26
Rps23.1	8.02247e-88	-0.424161	0.998	1	7.86844e-84	10	Rps23
Fos.7	4.12276e-85	0.737189	0.951	0.746	4.0436e-81	10	Fos
Wbp1	1.48312e-84	0.313621	0.423	0.108	1.45464e-80	10	Wbp1
Rpl35.5	1.17176e-82	-0.559846	1	0.999	1.14926e-78	10	Rpl35
Cst7.1	4.82968e-81	0.401604	0.61	0.217	4.73695e-77	10	Cst7
Rpl37a.6	8.44228e-81	-0.451647	1	1	8.28018e-77	10	Rpl37a
Rps20.8	3.8547e-80	-0.633433	1	1	3.78069e-76	10	Rps20
Sytl3	1.60655e-79	0.375127	0.521	0.166	1.5757e-75	10	Sytl3
Rpl27a.1	1.2311e-78	-0.372097	1	1	1.20747e-74	10	Rpl27a
Rps28.5	2.19785e-76	-0.511259	1	1	2.15565e-72	10	Rps28
Lilr4b	2.87998e-76	0.286882	0.289	0.057	2.82469e-72	10	Lilr4b
Tesc	5.14279e-76	0.359301	0.451	0.134	5.04405e-72	10	Tesc
Ubb.3	8.84848e-76	0.434184	0.998	0.994	8.67859e-72	10	Ubb
Rgs2.4	1.39489e-75	0.673438	0.756	0.375	1.36811e-71	10	Rgs2
Gng2.1	2.53152e-75	0.349271	0.528	0.175	2.48292e-71	10	Gng2
Ucp2.3	1.84363e-74	0.495949	0.862	0.51	1.80823e-70	10	Ucp2
Slamf7	2.46863e-74	0.304445	0.364	0.09	2.42123e-70	10	Slamf7
Itm2b.4	2.84158e-74	0.477997	0.974	0.819	2.78703e-70	10	Itm2b
Bhlhe40.4	2.12305e-73	0.445937	0.685	0.27	2.08228e-69	10	Bhlhe40
Gimap4.5	2.95998e-73	0.481481	0.859	0.482	2.90314e-69	10	Gimap4
Rpl23.4	3.29952e-73	-0.364525	1	1	3.23617e-69	10	Rpl23
Itgb2.5	2.88281e-72	0.432071	0.758	0.353	2.82746e-68	10	Itgb2
Dusp2.6	3.07371e-72	0.678852	0.887	0.545	3.0147e-68	10	Dusp2
Dusp1.6	1.01308e-71	0.72936	0.934	0.745	9.93629e-68	10	Dusp1
Cd3e.4	2.56748e-70	0.414527	0.988	0.923	2.51818e-66	10	Cd3e
Ctsw.6	2.72973e-69	0.438805	0.754	0.355	2.67732e-65	10	Ctsw
Plac8.3	2.74998e-69	0.4345	0.664	0.278	2.69718e-65	10	Plac8
Cd3g.6	2.92821e-69	0.450407	0.979	0.861	2.87199e-65	10	Cd3g
Pde7a	4.30979e-69	0.362591	0.566	0.212	4.22704e-65	10	Pde7a
Sh3bgrl3.8	6.80273e-69	0.460458	0.972	0.847	6.67212e-65	10	Sh3bgrl3
Ccr7.8	7.6976e-67	-0.900977	0.035	0.485	7.54981e-63	10	Ccr7
Gm19585.1	9.39598e-67	0.318201	0.5	0.168	9.21558e-63	10	Gm19585
Oaz1.2	9.70728e-67	0.368354	0.995	0.97	9.5209e-63	10	Oaz1
Ubac2	1.6242e-64	0.35848	0.556	0.216	1.59301e-60	10	Ubac2
Rpl17.3	1.8515e-64	-0.428178	0.974	0.994	1.81596e-60	10	Rpl17
Lcp1.4	1.04935e-61	0.421183	0.84	0.473	1.0292e-57	10	Lcp1
Rplp2.5	1.23938e-61	-0.41192	1	1	1.21559e-57	10	Rplp2
Itgal.4	2.80434e-61	0.36484	0.742	0.355	2.7505e-57	10	Itgal
2010111I01Rik	5.36028e-61	0.336848	0.453	0.154	5.25736e-57	10	2010111I01Rik
Ppp1r18.2	5.53348e-61	0.430721	0.829	0.51	5.42724e-57	10	Ppp1r18
Cxcr6.5	3.6679e-60	0.304045	0.545	0.194	3.59748e-56	10	Cxcr6
Hcst.7	3.87295e-60	0.421444	0.979	0.86	3.79859e-56	10	Hcst
Rplp0.6	4.42482e-60	-0.47076	1	1	4.33986e-56	10	Rplp0
Skap1.3	1.37411e-59	0.400441	0.84	0.494	1.34772e-55	10	Skap1
Rps27.5	1.78711e-59	-0.321174	1	1	1.7528e-55	10	Rps27
Gnas.3	6.77014e-59	0.443219	0.904	0.629	6.64016e-55	10	Gnas
Rpl9.2	5.53182e-58	-0.450403	0.911	0.978	5.42561e-54	10	Rpl9
Epsti1.3	4.44555e-57	0.398937	0.714	0.367	4.36019e-53	10	Epsti1
Jun.6	8.12137e-57	0.697961	0.845	0.597	7.96544e-53	10	Jun
Myo1f	9.42517e-57	0.26114	0.404	0.128	9.24421e-53	10	Myo1f
Tmsb4x.9	1.30132e-56	0.307067	1	1	1.27634e-52	10	Tmsb4x
Rps29.5	5.16336e-56	-0.490298	1	1	5.06422e-52	10	Rps29
Rps8.7	1.20302e-55	-0.375486	1	1	1.17992e-51	10	Rps8
Btg2.4	1.21018e-55	0.511753	0.833	0.557	1.18694e-51	10	Btg2
Gm10076.3	1.63306e-55	-0.281326	1	1	1.60171e-51	10	Gm10076
Pfn1.9	2.08167e-55	0.374661	1	0.969	2.04171e-51	10	Pfn1
Rpl5.5	4.83281e-55	-0.46502	0.953	0.986	4.74002e-51	10	Rpl5
Cebpb.3	6.86917e-55	0.489376	0.737	0.398	6.73728e-51	10	Cebpb
Rpl21.5	6.61837e-54	-0.396827	0.991	0.999	6.4913e-50	10	Rpl21
Rnf187.2	6.63672e-54	0.360988	0.669	0.337	6.5093e-50	10	Rnf187
Psmb8.4	8.91403e-54	0.428387	0.876	0.619	8.74288e-50	10	Psmb8
Fosb.3	1.50403e-53	0.471804	0.737	0.401	1.47516e-49	10	Fosb
Rpl10a.5	2.16334e-53	-0.403614	0.986	0.998	2.12181e-49	10	Rpl10a
Cd8b1.8	4.4207e-53	0.43331	0.798	0.394	4.33582e-49	10	Cd8b1
Rpl39.2	1.41664e-52	-0.284323	1	1	1.38944e-48	10	Rpl39
S100a6.8	2.2154e-52	0.324693	0.826	0.418	2.17287e-48	10	S100a6
Ptprcap.7	2.96707e-52	0.38071	0.901	0.617	2.9101e-48	10	Ptprcap
Thy1.6	3.10965e-52	0.43176	0.845	0.525	3.04994e-48	10	Thy1
H3f3b.4	7.27166e-52	0.399253	1	0.993	7.13204e-48	10	H3f3b
Ccnd3.3	1.75131e-51	0.393021	0.697	0.375	1.71768e-47	10	Ccnd3
Rplp1.6	7.97578e-51	-0.345477	1	1	7.82265e-47	10	Rplp1
Atp1b3.2	3.43771e-50	-0.501972	0.171	0.532	3.37171e-46	10	Atp1b3
Tpt1.1	5.68749e-50	-0.255493	1	1	5.57829e-46	10	Tpt1
Pnrc1.1	1.32501e-49	0.386758	0.969	0.903	1.29957e-45	10	Pnrc1
Arpc1b.3	1.66656e-49	0.371998	0.908	0.689	1.63456e-45	10	Arpc1b
Rps13.1	2.97612e-49	-0.270025	1	1	2.91898e-45	10	Rps13
Rpl24.3	3.79223e-49	-0.340002	0.988	0.999	3.71942e-45	10	Rpl24
Cd226.1	1.79676e-48	0.262567	0.369	0.123	1.76226e-44	10	Cd226
Egr1.9	1.9812e-48	0.552719	0.601	0.277	1.94316e-44	10	Egr1
H2-T22.2	6.58257e-48	0.374653	0.739	0.435	6.45618e-44	10	H2-T22
Rps18.3	1.73569e-47	-0.35807	0.993	0.999	1.70236e-43	10	Rps18
Aldoa.2	1.87273e-47	0.382293	0.754	0.45	1.83677e-43	10	Aldoa
Aph1a	2.4708e-47	0.257392	0.432	0.163	2.42336e-43	10	Aph1a
Cbx4	3.25662e-47	0.369858	0.566	0.264	3.1941e-43	10	Cbx4
Rpl18.4	3.82227e-47	-0.297039	1	1	3.74889e-43	10	Rpl18
Rps7.4	8.46901e-47	-0.337013	1	1	8.30641e-43	10	Rps7
Rpl7.2	9.26371e-47	-0.328926	0.984	0.998	9.08585e-43	10	Rpl7
Tpst2	1.06836e-46	0.327921	0.667	0.344	1.04785e-42	10	Tpst2
Bcl2a1b.1	1.93279e-46	0.265018	0.486	0.191	1.89568e-42	10	Bcl2a1b
Rps21.5	1.42253e-44	-0.285024	1	1	1.39522e-40	10	Rps21
Nedd9	1.63081e-44	0.260844	0.404	0.15	1.59949e-40	10	Nedd9
Satb1.4	3.172e-44	-0.522024	0.129	0.47	3.1111e-40	10	Satb1
Cd52.8	3.87649e-44	0.302735	0.998	0.959	3.80206e-40	10	Cd52
H2-Q4.1	4.77014e-44	0.376591	0.845	0.579	4.67856e-40	10	H2-Q4
Ubc.3	4.29424e-43	0.382181	0.934	0.791	4.21179e-39	10	Ubc
Hopx.2	4.93088e-43	0.270303	0.469	0.194	4.83621e-39	10	Hopx
Sla	3.80286e-42	0.279164	0.493	0.214	3.72984e-38	10	Sla
Lat.1	5.12827e-42	0.339848	0.965	0.819	5.02981e-38	10	Lat
Serpinb6a	6.93807e-42	0.506037	0.251	0.075	6.80486e-38	10	Serpinb6a
Rps3a1.5	1.46625e-41	-0.272638	1	1	1.4381e-37	10	Rps3a1
Rps11.3	4.53194e-41	-0.290912	1	1	4.44493e-37	10	Rps11
Shisa5.4	5.165e-41	0.328535	0.977	0.909	5.06583e-37	10	Shisa5
Slc9a3r1	7.64032e-41	0.282355	0.617	0.315	7.49363e-37	10	Slc9a3r1
Zyx.3	1.02005e-40	0.318849	0.573	0.284	1.00047e-36	10	Zyx
Junb.7	1.0304e-40	0.443594	0.962	0.961	1.01061e-36	10	Junb
Tma7.1	2.14309e-40	0.320586	0.862	0.631	2.10195e-36	10	Tma7
Rps24.4	8.46886e-40	-0.2731	1	1	8.30626e-36	10	Rps24
Slc3a2.1	1.84218e-39	0.354477	0.714	0.423	1.80681e-35	10	Slc3a2
Gpx4.2	1.93213e-39	0.329631	0.749	0.462	1.89504e-35	10	Gpx4
Sept9.1	2.751e-39	0.265321	0.577	0.281	2.69819e-35	10	Sept9
H2-Q7.4	3.38573e-39	0.332084	0.953	0.809	3.32073e-35	10	H2-Q7
Psmb9.3	3.69665e-39	0.325064	0.667	0.382	3.62567e-35	10	Psmb9
Cd82.3	4.676e-39	0.305112	0.587	0.291	4.58622e-35	10	Cd82
Gimap7.3	1.05563e-38	0.308377	0.519	0.248	1.03536e-34	10	Gimap7
Pgam1.1	1.82571e-38	0.300431	0.467	0.211	1.79066e-34	10	Pgam1
Ppia.3	2.95966e-38	0.274719	1	0.998	2.90284e-34	10	Ppia
Rpl36a.6	6.59341e-38	-0.355375	0.993	0.997	6.46682e-34	10	Rpl36a
Cd69.1	3.95989e-37	0.455119	0.843	0.638	3.88386e-33	10	Cd69
Capzb.2	9.2411e-37	0.340118	0.758	0.501	9.06367e-33	10	Capzb
Zfp36.6	1.15174e-36	0.508642	0.833	0.614	1.12963e-32	10	Zfp36
Cox5a.1	2.0393e-36	0.309082	0.786	0.502	2.00015e-32	10	Cox5a
Atp6v0e.2	2.65512e-36	0.302578	0.711	0.422	2.60414e-32	10	Atp6v0e
H2-Q6.4	2.86755e-36	0.321988	0.805	0.515	2.8125e-32	10	H2-Q6
Zfp36l2.4	3.80157e-36	0.416368	0.904	0.801	3.72858e-32	10	Zfp36l2
Rps12.4	4.92822e-36	-0.33402	0.998	0.999	4.83359e-32	10	Rps12
Ube2s	7.1053e-36	0.289933	0.657	0.371	6.96888e-32	10	Ube2s
Rpl32.4	7.54711e-36	-0.285219	1	1	7.40221e-32	10	Rpl32
Ccnd2.1	8.72212e-36	0.329255	0.69	0.398	8.55465e-32	10	Ccnd2
Rps15a.3	7.55795e-35	-0.264988	1	1	7.41284e-31	10	Rps15a
Arhgdia	1.48903e-34	0.291313	0.725	0.445	1.46044e-30	10	Arhgdia
Malat1.5	1.72805e-34	0.317166	0.993	0.977	1.69488e-30	10	Malat1
Tsc22d4	2.07708e-34	0.268231	0.585	0.307	2.0372e-30	10	Tsc22d4
Srsf2	3.8727e-34	0.331471	0.709	0.444	3.79835e-30	10	Srsf2
Pstpip1	4.2132e-34	0.264229	0.458	0.216	4.1323e-30	10	Pstpip1
Klf6.3	4.9375e-34	0.397611	0.89	0.745	4.8427e-30	10	Klf6
Ctsd.3	5.16914e-34	0.284186	0.669	0.374	5.06989e-30	10	Ctsd
Gimap3.4	7.74983e-34	0.302253	0.838	0.555	7.60104e-30	10	Gimap3
Eef1b2.4	7.85315e-34	-0.352569	0.951	0.984	7.70237e-30	10	Eef1b2
Rps6.2	2.40145e-33	-0.311441	0.953	0.991	2.35534e-29	10	Rps6
S1pr1.2	3.11062e-33	-0.347294	0.033	0.307	3.05089e-29	10	S1pr1
Lck.1	3.21154e-33	0.297568	0.883	0.686	3.14988e-29	10	Lck
Calm3	4.23519e-33	0.26188	0.556	0.292	4.15388e-29	10	Calm3
Arf6	6.06886e-33	0.305765	0.707	0.454	5.95234e-29	10	Arf6
Lef1.7	8.84089e-33	-0.411583	0.115	0.394	8.67114e-29	10	Lef1
Rinl	9.54623e-33	0.283161	0.535	0.289	9.36294e-29	10	Rinl
Tln1.1	1.85963e-32	0.270895	0.667	0.389	1.82392e-28	10	Tln1
Zap70.1	1.98273e-32	0.27083	0.552	0.294	1.94466e-28	10	Zap70
Rhob.1	3.841e-32	0.376324	0.413	0.191	3.76725e-28	10	Rhob
Rack1.1	1.06311e-31	-0.291638	0.972	0.986	1.0427e-27	10	Rack1
Socs1	1.09461e-31	0.32085	0.434	0.207	1.07359e-27	10	Socs1
Aes.1	1.32035e-31	0.271491	0.721	0.462	1.295e-27	10	Aes
Gadd45g	5.48869e-31	0.285198	0.237	0.077	5.3833e-27	10	Gadd45g
Edf1.3	5.77595e-31	0.250618	0.754	0.481	5.66505e-27	10	Edf1
Sept1.3	1.60335e-30	0.293213	0.803	0.543	1.57257e-26	10	Sept1
Prr13.6	1.78886e-30	0.259239	0.638	0.354	1.75451e-26	10	Prr13
Sell.5	2.03704e-30	-0.329127	0.033	0.288	1.99792e-26	10	Sell
Rpl23a.4	3.20909e-30	-0.340447	0.892	0.945	3.14748e-26	10	Rpl23a
Tsc22d3.1	3.84773e-30	0.407658	0.89	0.787	3.77385e-26	10	Tsc22d3
Klf2.4	1.55772e-29	-0.358292	0.601	0.867	1.52782e-25	10	Klf2
H2afy	1.6889e-29	0.286331	0.608	0.361	1.65647e-25	10	H2afy
Cnn2.3	1.29263e-28	0.283221	0.803	0.557	1.26781e-24	10	Cnn2
mt-Nd3.3	5.03567e-28	-0.390066	0.143	0.39	4.93899e-24	10	mt-Nd3
Adgre5.1	7.92257e-28	0.256985	0.646	0.387	7.77045e-24	10	Adgre5
Ifi27.1	1.3135e-27	0.277633	0.547	0.316	1.28828e-23	10	Ifi27
Hmgn2.2	4.41888e-27	0.273345	0.617	0.378	4.33404e-23	10	Hmgn2
Eif5a.1	5.38987e-27	0.290252	0.824	0.62	5.28639e-23	10	Eif5a
Pik3r1.1	2.06881e-26	0.262155	0.448	0.23	2.02909e-22	10	Pik3r1
Ppp1ca.3	3.15103e-26	0.255921	0.751	0.518	3.09053e-22	10	Ppp1ca
Actn1.4	8.25601e-26	-0.277172	0.035	0.261	8.09749e-22	10	Actn1
Ppp1r15a.2	1.32048e-25	0.291753	0.847	0.645	1.29513e-21	10	Ppp1r15a
Ier5.3	5.35456e-25	0.293814	0.711	0.483	5.25175e-21	10	Ier5
Cyba.8	9.04575e-25	0.253086	0.864	0.651	8.87207e-21	10	Cyba
Rpl10.3	1.46453e-24	-0.334307	0.812	0.893	1.43641e-20	10	Rpl10
Rsrp1	1.77318e-24	0.25902	0.589	0.359	1.73913e-20	10	Rsrp1
Xist.6	4.33995e-24	0.278193	0.359	0.166	4.25663e-20	10	Xist
Hnrnpa2b1.1	1.16072e-23	0.266985	0.857	0.681	1.13843e-19	10	Hnrnpa2b1
Igfbp4.8	1.66833e-23	-0.486453	0.023	0.23	1.6363e-19	10	Igfbp4
Cited2	4.46436e-23	0.375341	0.493	0.285	4.37865e-19	10	Cited2
Gm8369.4	8.13495e-23	-0.340849	0.207	0.429	7.97876e-19	10	Gm8369
H2afj.2	8.46962e-23	0.268077	0.81	0.645	8.307e-19	10	H2afj
mt-Co1.5	1.32614e-22	-0.331175	1	1	1.30068e-18	10	mt-Co1
Emb.2	1.82341e-22	-0.355534	0.319	0.542	1.7884e-18	10	Emb
Actr3.2	2.6953e-22	0.261895	0.739	0.536	2.64355e-18	10	Actr3
Ltb.4	4.8565e-22	0.310707	0.843	0.712	4.76325e-18	10	Ltb
Rpl15.6	7.65224e-22	-0.273422	0.993	0.996	7.50532e-18	10	Rpl15
mt-Nd4.5	5.35761e-21	-0.357109	0.8	0.887	5.25474e-17	10	mt-Nd4
Cd37.3	5.50321e-21	0.25102	0.613	0.413	5.39755e-17	10	Cd37
Rpl29.7	7.32586e-21	-0.536403	0.765	0.88	7.1852e-17	10	Rpl29
Tcf7.4	1.89411e-20	-0.343404	0.279	0.476	1.85775e-16	10	Tcf7
Txnip.3	1.94375e-19	0.266902	0.772	0.57	1.90643e-15	10	Txnip
Rps15.3	2.34857e-19	-0.255803	0.955	0.965	2.30348e-15	10	Rps15
Ly6c2.7	7.57891e-19	-0.581952	0.07	0.253	7.4334e-15	10	Ly6c2
Klf3.3	7.59741e-18	-0.266167	0.185	0.385	7.45154e-14	10	Klf3
[truncated: 14 more rows]
