# Supplementary material for: The T Cell Receptor Immune Repertoire Protects the Liver From Reconsitution
Source: Front Immunol. 2020 Dec 18;11:584979. doi: 10.3389/fimmu.2020.584979 (PMC7775400; doi:10.3389/fimmu.2020.584979)
Supplement: Supplementary file 8 [file Table_7.xlsx]

## Sheet: actGene
	Cluster0	Cluster1	Cluster2	Cluster3	Cluster4	Cluster5	Cluster6	Cluster7	Cluster8	Cluster9	Cluster10
activeGeneExpression
Il2rb	0.237184	0.231195	0.651852	0.887269	1.93649	0.824993	0.800585	1.15538	1.37708	0.523025	1.22915
Il6ra	0.394693	0.29767	0.409344	0.0456404	0.0196728	0.331593	0.0105259	0.185224	0.231485	0.290301	0.0190067
Cd53	0.855045	1.04333	0.950409	0.780691	0.978807	1.08302	0.568382	0.728773	0.822501	0.866429	0.712445
Cd69	1.28497	1.07849	1.40073	1.06641	1.63138	1.61767	1.28373	1.22116	1.47022	1.27871	1.99231
Cd74	0.192969	0.301593	0.335727	0.325477	0.288174	0.374122	0.363621	0.284977	0.467296	0.299683	0.278442
Ccr5	0.0136303	0.0133855	0.0570384	0.181659	0.216238	0.0781513	0.453336	0.108836	0.0640599	0.0610981	0.285388
Pik3cd	0.619282	0.801577	1.04023	0.785986	0.765423	0.492106	0.931425	0.817705	0.753933	0.676744	0.893759
Trbc1	0.531758	0.726685	0.744539	0.609994	0.785364	0.676971	1.14043	0.614284	0.849765	0.614228	0.770781
Ctla4	0.181107	0.175488	0.226866	0.19471	0.216387	1.33103	1.08199	0.317543	1.17012	0.369294	0.245352
Dusp2	0.762811	0.648657	1.2071	1.65868	2.04285	0.766815	2.06669	1.41103	1.10093	0.868139	2.24791
Fos	2.07407	1.33879	0.759275	1.2191	2.62335	2.1196	1.29399	1.21384	1.25734	1.70785	2.76329
Ifngr1	1.1235	0.841686	1.44541	1.27488	1.01873	1.30356	0.892489	1.27364	1.11336	1.12947	1.05827
Ifngr2	0.287926	0.255618	0.277915	0.0131814	0.00352851	0.0566891	0.00621773	0.0402487	0.0771437	0.144535	0.0111743
Itgb1	0.124957	0.145069	0.201515	1.05765	0.562184	1.2567	0.772011	0.413261	0.693081	0.379952	0.407415
Ubc	1.615	1.32341	1.68066	1.4575	1.96704	1.73744	1.4799	1.67838	1.90387	1.66633	2.22384
Ccl5	0.356668	0.819529	0.663487	5.67961	2.49367	0.906963	6.15262	2.79686	0.579687	0.916031	4.82872
Ccl4	0.0883023	0.0647449	0.119821	1.6671	0.138365	0.0856805	3.11727	0.736462	0.183729	0.163829	2.26348
Gzma	0.0474186	0.0863846	0.0863673	1.92746	0.0696114	0.084061	1.61614	0.456735	0.125844	0.0957022	0.23637
Gzmk	0.00347772	0.00769973	0.0159551	0.57522	0.0486263	0.0498621	1.49688	0.141182	0.029194	0.0527148	0.473706
Tnfrsf1b	0.045895	0.0619189	0.156142	0.147205	0.22102	0.272233	0.310856	0.208546	0.376289	0.110623	0.240406
Cd2	0.639259	0.766512	0.28208	0.991918	0.88509	1.21812	1.07643	0.539181	0.421687	0.714205	0.779117
Cd44	0.0697038	0.0626334	0.174336	0.2641	0.63428	0.579271	0.171436	0.323899	1.08403	0.208601	0.501654
Tap1	0.29704	0.263311	0.087234	0.394658	0.376992	0.439261	0.68243	0.206254	0.14857	0.264454	0.49283
Stat1	0.591599	0.4194	0.431332	0.300672	0.600739	0.58987	0.475328	0.441175	0.43389	0.513826	0.700197
Tigit	0.0744569	0.0520317	0.0660817	0.254125	0.121895	0.495413	0.882048	0.174119	0.178676	0.150474	0.421149
Tnfrsf18	0.163019	0.204373	0.0655682	0.262904	0.600157	0.631011	0.34158	0.111891	0.329143	0.238905	0.401494
Maf	0.0325569	0.0367954	0.103746	0.0515175	0.24877	0.635837	0.0922122	0.114889	0.754668	0.148406	0.127513
celltype
CD4	0.807846	0.685279	0.558824	0.0162413	0.0493653	0.786436	0.0147783	0.121857	0.732252	0.653689	0.00469484
CD8	0.177742	0.294416	0.426471	0.950116	0.0352609	0.0836941	0.835796	0.779497	0.11359	0.262295	0.133803
γδ T	0.00560448	0.00507614	0	0.00464037	0.00423131	0.0909091	0.0525452	0.0212766	0.0973631	0.0163934	0.0375587
NKT	0.00880705	0.0152284	0.0147059	0.0290023	0.911142	0.038961	0.0968801	0.0773694	0.0567951	0.067623	0.823944
group
Ctrl	0.972778	0.0626058	0.0818015	0.179814	0.744711	0.611833	0.0394089	0.55706	0.0811359	0.625	0.99061
4 W	0.0232186	0.936548	0.00551471	0.817865	0.253879	0.386724	0.957307	0.0154739	0.0162272	0.192623	0.00938967
8 W	0.0040032	0.000846024	0.912684	0.00232019	0.00141044	0.001443	0.00328407	0.427466	0.902637	0.182377	0
