# Supplementary material for: The T Cell Receptor Immune Repertoire Protects the Liver From Reconsitution
Source: Front Immunol. 2020 Dec 18;11:584979. doi: 10.3389/fimmu.2020.584979 (PMC7775400; doi:10.3389/fimmu.2020.584979)
Supplement: Supplementary file 11 [file Table_10.xlsx]

## Sheet: TRBV
V region	Ctrl-1	Ctrl-2	Ctrl-3	Ctrl-4	Ctrl-5	CCl4-1	CCl4-2	CCl4-3	CCl4-4	CCl4-5	P value	sig
TRBV2	91.6235	168.517	163.278	107.256	213.37	132.23	187.729	35.1844	30.2911	0.244405	0.131808	no
TRBV17	2939.39	2815.87	242.062	3533.02	1446.77	317.905	0.501501	0.556275	990.617	1509.69	0.0506783	no
TRBV7-2	0	0	0	0	0.115899	0	0	0	0	0	0.373901	no
TRBV19	469.511	898.933	40.7097	259.711	67.4533	242.906	1200.93	960.13	278.161	71.7328	0.479207	no
TRBV12-1	53995.4	55501.6	581.358	113838	12613.1	9.17453	8.35835	70205.5	31598.2	145047	0.952699	no
TRBV13-1	52246.5	37897.7	74700	138988	37397.7	257008	16.048	16544.6	63308.8	269525	0.432042	no
TRBV30	4151.6	3674.72	8376.24	2150.48	11277.5	8804.34	16785.7	56730	9216.37	1.95524	0.28444	no
TRBV13-2	140974	85998.5	182506	98814.3	71739.5	141113	33394	49090.4	65568.8	82109.5	0.167536	no
TRBV6	0.59963	0.650646	0.732189	0.596694	0.115899	0	1.17017	0.417206	0.246269	0.122202	0.549654	no
TRBV21	328.118	2171.99	2.34301	2.08843	1.73849	2.03878	2.50751	100058	6576.25	1.71083	0.3506	no
TRBV23	325.839	153.683	195.934	274.479	0	0	0	0	47.8993	0	0.0313662	down
TRBV15	67407.8	41039.8	1748.61	69377.7	51429.9	841.581	4.17918	4.4502	16571.8	4.8881	0.0230983	down
TRBV12-2	1422.08	470.938	32.9485	505.847	657.612	53.2996	0	0.417206	205.512	0.733215	0.0658636	no
TRBV24	79.2711	573.089	64.872	31.3264	65.3671	10.1939	229.855	7.23157	430.232	0	0.843667	no
TRBV16	32959.2	34744	2923.05	26574.7	21172.9	20162.4	3.84484	12814.1	68103.9	11522	0.933075	no
TRBV20	1840.27	679.014	1562.93	1284.53	819.639	1369.04	0.167167	605.366	1884.57	513.739	0.394391	no
TRBV26	36037.3	35140.8	4.39313	26021.1	48974.4	2686.83	23657	13.7678	78467.6	6.11012	0.645733	no
TRBV1	310191	373817	492864	310323	412510	362519	599452	359095	438749	325443	0.555507	no
TRBV31	32176.3	38298.1	64340.2	35292.5	23200.6	29962.4	39344.1	59386.6	16711.4	4.27709	0.457648	no
TRBV4	182.288	133.643	287.604	118.145	410.051	503.434	84.4194	174.114	160.691	197.235	0.97986	no
TRBV5	68034	109730	127506	39798.1	190570	123312	205170	125594	111966	136206	0.316163	no
TRBV13-3	100498	111602	18838.6	72851	83457.4	24037.7	6540.91	91731.1	56977.9	9.8984	0.114821	no
TRBV14	10333	7878.8	6018.59	8338.8	17413.2	15243.4	1.67167	15626.3	5269.42	23877.5	0.681788	no
TRBV29	74032.9	36398.1	13787.3	43502	7353.22	7041.67	66779.4	33676.6	7851.43	4.15488	0.504965	no
TRBV3	9284.32	20212.3	3211.82	8013	7208.23	4627.16	7135.53	7646.41	19035	3942.98	0.785805	no

## Sheet: TRBJ
J region	Ctrl-1	Ctrl-2	Ctrl-3	Ctrl-4	Ctrl-5	CCl4-1	CCl4-2	CCl4-3	CCl4-4	CCl4-5	P value	sig
TRBJ1-3	39029.1	38618.5	42079.8	27699.1	39168.1	52980.7	27786.8	8333.41	64055.6	12292.3	0.725411	no
TRBJ2-5	87624.1	108966	116925	85420.9	96079.6	76498.2	116516	133331	277826	51814.4	0.462495	no
TRBJ1-5	29961	28898.1	16916.4	17427	52765.6	20419.9	49962.2	28745.1	10794.3	87439.4	0.522442	no
TRBJ2-2	44971.8	50094.4	99860.3	19651.7	25183.6	29249	92313.8	69065.9	58858.9	31695.3	0.666231	no
TRBJ1-6	77830.5	35731.8	57919.2	121519	41988.1	36041	89226.3	46915.5	26672.3	46725.9	0.372704	no
TRBJ1-2	68772.8	54075.2	40009	55813.3	50067.5	53831.7	34737.5	52975.3	56829.9	40341.5	0.371335	no
TRBJ2-6	0	0.130129	0	0	0	0	0	0	0	0.122202	0.965675	no
TRBJ1-1	126291	123989	177326	94946.1	216972	136176	207469	81137.7	86058.2	56388.7	0.34911	no
TRBJ2-1	117089	108200	97530.2	95920.8	121706	71258	210679	215127	73771.1	279484	0.211702	no
TRBJ2-3	87928.9	91126.5	78277.2	56756.9	101387	88820.2	42757.8	110253	53897.2	99074.3	0.79282	no
TRBJ2-4	78807.9	160204	105200	50905.4	70321.5	66545.6	121358	52890.9	70294.1	91030.9	0.589394	no
TRBJ1-4	65205.6	58099.6	80193.6	210033	38757.6	90286.7	5267.27	95456.9	155749	26998.8	0.709684	no
TRBJ2-7	176489	141997	87763.7	163907	145604	277893	1926.6	105769	65193.1	176714	0.738392	no

## Sheet: TRB VJ
VJ combination	Ctrl-1	Ctrl-2	Ctrl-3	Ctrl-4	Ctrl-5	CCl4-1	CCl4-2	CCl4-3	CCl4-4	CCl4-5	P value	sig
TRBV17_TRBJ2-4	184.326	69.3589	0.292876	120.98	240.027	0.436882	0	0	1.60075	4.03268	0.0443308	down
TRBV17_TRBJ2-7	355.461	391.168	0.292876	165.732	188.336	0.291255	0	0	0.246269	1.09982	0.0358192	down
TRBV2_TRBJ1-5	8.03505	4.03401	2.34301	10.1438	12.5171	0.145627	0.167167	0	6.403	0	0.0317861	down
TRBV13-2_TRBJ1-2	15248.5	4339.42	9706.63	16631.5	13487.9	7909.17	73.7207	100.686	1343.52	11803.3	0.0470206	down
TRBV12-2_TRBJ2-5	45.8118	80.9404	0	57.2826	124.244	0.145627	0	0	0.369404	0	0.0395302	down
TRBV12-2_TRBJ2-7	69.9169	80.0295	0	101.885	68.1487	0.145627	0	0	0.985076	0.611012	0.0203883	down
TRBV15_TRBJ1-4	3088.58	5483	1686.38	5343.99	91.3286	7.13574	0.167167	0.139069	37.4329	0.122202	0.0399159	down
TRBV16_TRBJ2-3	5738.46	5238.61	5.85751	2850.41	1631.05	27.3779	0.501501	6.6753	107.127	14.2977	0.0470994	down
TRBV31_TRBJ1-2	3787.51	4397.07	5488.2	3717.85	84.0269	53.5909	65.8638	132.393	22.2873	0.366607	0.0193972	down
TRBV31_TRBJ1-1	3103.57	5788.28	6575.79	1628.83	4365.69	2424.84	247.073	282.727	112.052	0.244405	0.0106351	down
TRBV13-3_TRBJ2-1	12663.8	4556.87	5818.41	6095.97	4414.14	37.7175	14.3764	204.292	5591.42	0.48881	0.020706	down
TRBV29_TRBJ2-3	3548.97	3751.37	3843.26	3131.9	22.0208	13.2521	100.802	85.11	20.3172	0.244405	0.0173454	down
TRBV17_TRBJ2-5	189.603	445.693	0	982.755	1.97029	139.22	0	0	1.60075	744.946	0.548334	no
TRBV17_TRBJ1-3	122.205	31.231	0.146438	2.2376	240.491	0	0	0	1.10821	0.611012	0.161445	no
TRBV17_TRBJ1-5	48.5701	1.95194	84.6411	0.298347	1.15899	0.291255	0	0	0	3.05506	0.192488	no
TRBV17_TRBJ2-2	313.607	49.1889	0.146438	196.909	212.907	0.436882	0.334334	0.139069	626.755	744.58	0.531736	no
TRBV17_TRBJ1-6	50.249	1.69168	0	2.68512	1.50669	0.291255	0	0	0.123135	0.97762	0.325016	no
TRBV17_TRBJ1-2	137.195	1.43142	0	97.2611	1.50669	0	0	0	0.492538	1.09982	0.181217	no
TRBV17_TRBJ2-1	1119.87	137.807	0.292876	250.313	411.906	0.728137	0.167167	0.278137	354.751	1.71083	0.19363	no
TRBV17_TRBJ1-1	65.9594	133.382	154.345	4.02768	143.367	174.898	0	0	1.23135	3.29947	0.191987	no
TRBV17_TRBJ2-3	350.184	206.645	0.439313	3.87851	2.54978	1.01939	0	0	0.369404	3.29947	0.192171	no
TRBV17_TRBJ1-4	2.15867	1346.32	1.46438	1705.95	1.04309	0.291255	0	0.139069	2.33956	0.97762	0.181288	no
TRBV2_TRBJ2-5	8.7546	27.8477	24.8944	12.8289	22.4844	29.2711	1.17017	0	0	0	0.0956768	no
TRBV2_TRBJ1-3	4.91697	2.60258	0	0.298347	10.4309	4.95133	0	0	0	0	0.263247	no
TRBV2_TRBJ2-2	17.6291	4.55452	0.585751	0	0.927193	0.145627	25.0751	0	8.98882	0	0.731941	no
TRBV2_TRBJ1-6	2.51845	1.04103	13.6187	13.8731	36.3923	0.291255	41.7918	0	0	0	0.641984	no
TRBV2_TRBJ1-2	13.9114	9.62956	10.2506	6.71281	11.9376	0.145627	18.3884	0	0	0	0.141295	no
TRBV2_TRBJ2-1	3.47786	32.5323	16.9868	0	19.7029	14.4171	20.3944	16.271	0	0	0.56993	no
TRBV2_TRBJ2-3	5.5166	31.3611	0.732189	15.6632	0.811294	44.1251	37.2783	0	0.123135	0	0.651283	no
TRBV2_TRBJ1-1	6.11623	23.6835	27.6767	14.3207	59.9199	13.2521	0.835835	0	0.246269	0.244405	0.0616633	no
TRBV2_TRBJ2-4	2.39852	12.4924	40.4168	7.75702	0	0	14.5435	0	0	0	0.268314	no
TRBV2_TRBJ1-4	4.31734	12.4924	0.585751	12.0831	26.6568	5.67947	28.0841	18.9133	0.123135	0	0.928068	no
TRBV2_TRBJ2-7	14.0314	6.2462	25.1873	13.5748	11.5899	19.8053	0	0	14.4067	0	0.208371	no
TRBV7-2_TRBJ1-1	0	0	0	0	0.115899	0	0	0	0	0	0.373901	no
TRBV12-1_TRBJ1-3	3653.79	4936.58	0.732189	2306.22	15.6464	0.145627	0.334334	15.7148	41.0038	46.1925	0.0921018	no
TRBV12-1_TRBJ2-5	3241.48	7314.17	2.19657	6474.43	70.3508	0.145627	0.334334	133.228	128.06	139.189	0.0958921	no
TRBV12-1_TRBJ1-5	953.173	1050.92	0.585751	64.4429	22.3685	0	0	8.62226	4.43284	54.1357	0.165609	no
TRBV12-1_TRBJ2-2	5097.1	4936.58	1.02506	2360.67	12.5171	0.873764	0.334334	23998.9	28.1978	34.5833	0.658416	no
TRBV12-1_TRBJ1-6	3845.79	69.6191	0.878627	267.021	5902.17	0	0.334334	92.2025	42.6045	114.993	0.179804	no
TRBV12-1_TRBJ1-2	2844.05	4911.99	0.732189	10068.6	76.1458	0.728137	1.003	27060.7	35.2165	139.922	0.757307	no
TRBV12-1_TRBJ2-6	0	0	0	0	0	0	0	0	0	0.122202	0.373901	no
TRBV12-1_TRBJ1-1	192.961	2531.27	1.1715	2098.12	23.9911	0.873764	0.334334	72.4548	14087.1	290.842	0.535289	no
TRBV12-1_TRBJ2-1	12585.5	11090.5	3.07519	236.142	62.2379	0.291255	0.167167	139.903	100.97	432.963	0.181541	no
TRBV12-1_TRBJ2-3	4390.49	3112.17	0.732189	5976.49	26.0773	0.291255	0.668668	18414.4	38.7874	109.371	0.804224	no
TRBV12-1_TRBJ2-4	4994.32	1279.3	0.878627	186.318	23.8752	0	0.334334	66.0576	8555.51	49.9808	0.829972	no
TRBV12-1_TRBJ1-4	4428.03	5436.8	564.371	7251.47	13.9079	0.145627	0.668668	161.876	38.6642	16911.8	0.975763	no
TRBV12-1_TRBJ2-7	7768.69	8831.61	4.97889	76547.9	6363.79	5.67947	3.84484	41.4425	8497.64	126723	0.811404	no
TRBV19_TRBJ2-5	53.0073	36.1759	0	23.2711	13.792	0.291255	336.173	137.817	65.3844	0	0.257746	no
TRBV19_TRBJ1-3	22.9059	20.17	0	25.6578	0	0	0.334334	95.262	0.492538	0	0.794438	no
TRBV19_TRBJ1-5	5.39667	4.81478	0	12.0831	0	0.145627	0	59.6605	41.9889	0	0.282921	no
TRBV19_TRBJ2-2	13.3118	102.802	0	18.1992	0	0	61.5175	79.2691	0.615673	0.122202	0.957155	no
TRBV19_TRBJ1-6	12.2325	25.8957	7.7612	6.71281	14.7192	235.334	30.0901	63.4153	0.369404	0.122202	0.299495	no
TRBV19_TRBJ1-2	13.4317	15.095	0	0.298347	0.115899	0	79.9059	13.9069	18.2239	71.244	0.130407	no
TRBV19_TRBJ2-1	36.8173	91.611	0	39.531	16.4577	0.436882	162.821	240.728	31.0299	0	0.374086	no
TRBV19_TRBJ1-1	29.3819	472.369	15.0831	63.8462	8.92424	5.97072	93.112	34.2109	18.5933	0.122202	0.385759	no
TRBV19_TRBJ2-3	35.1383	45.4151	9.22558	16.7074	0	0.145627	107.99	38.9392	57.1344	0.122202	0.407589	no
TRBV19_TRBJ2-4	21.4668	44.5042	8.20052	6.56363	0	0	134.904	70.925	14.653	0	0.356431	no
TRBV19_TRBJ1-4	43.8929	26.6765	0	17.7516	0.115899	0.291255	193.747	49.6475	0.985076	0	0.457093	no
TRBV19_TRBJ2-7	182.528	13.4033	0.439313	29.0888	13.3284	0.291255	0.334334	76.3487	28.6903	0	0.502482	no
TRBV13-1_TRBJ2-5	3688.09	5509.54	3911.35	2991.38	104.773	7973.1	0.668668	28.2309	102.571	6074.56	0.842232	no
TRBV13-1_TRBJ1-3	1042.04	1101.15	3970.08	1177.58	4688.24	2966.28	0.167167	13.0725	142.344	161.307	0.119163	no
TRBV13-1_TRBJ1-5	2328.49	1259.91	1411.07	103.676	155.768	1593.75	0.668668	14.6022	104.541	15.0309	0.21635	no
TRBV13-1_TRBJ2-2	2152.67	1549.84	5006.71	1593.32	23.7593	2262.18	0.167167	17.8008	147.638	33.1169	0.139812	no
TRBV13-1_TRBJ1-6	998.385	2624.19	34.9986	109223	64.5558	4426.78	0.501501	4848.91	5657.05	28.962	0.417222	no
TRBV13-1_TRBJ1-2	4637.06	4376.64	2480.95	4013.36	11474.3	2634.84	1.17017	20.165	24068.4	8122.43	0.755931	no
TRBV13-1_TRBJ2-3	1721.06	2911.77	5746.66	1823.65	4691.71	6901.72	0.334334	8317.84	43.7128	162.407	0.889869	no
TRBV13-1_TRBJ1-1	5281.31	4809.19	13496.6	3846.89	5230.65	9505.54	1.5045	3122.51	120.302	673.58	0.164493	no
TRBV13-1_TRBJ2-1	5054.05	3857.16	7552.24	1699.53	2987.53	8570.75	4.34634	60.3558	12423.7	245487	0.365343	no
TRBV13-1_TRBJ2-4	4833.26	1552.83	6982.74	3862.25	67.4533	5434.09	1.33734	30.317	11320.4	248.071	0.984066	no
TRBV13-1_TRBJ1-4	4663.69	2297.3	2684.35	634.882	122.274	4028.78	0	30.7342	44.2053	69.0444	0.304262	no
TRBV13-1_TRBJ2-7	15846.4	6048.15	21422.2	8019.27	7786.69	200710	5.18218	40.0518	9134	8450.18	0.464028	no
TRBV30_TRBJ2-5	9.95387	5.07504	3173.01	5.66859	5323.25	5242.15	42.9619	81.9114	67.724	0.244405	0.693479	no
TRBV30_TRBJ1-3	5.5166	3.77375	24.8944	2.68512	11.7058	24.611	6.85385	13.9069	19.8247	0	0.596208	no
TRBV30_TRBJ1-5	4.07749	4.68465	14.058	0.895041	10.8945	18.0578	21.5645	23.5026	3.2015	0	0.288243	no
TRBV30_TRBJ2-2	4.07749	3.51349	44.3707	2.53595	13.5602	17.9122	35.4394	32.5421	14.1605	0	0.550003	no
TRBV30_TRBJ1-6	7.55534	3.1231	22.9907	1.49173	34.8857	49.0764	23.2362	62.3028	6.403	0.122202	0.336513	no
TRBV30_TRBJ1-2	981.715	1164.92	23.8694	2.08843	13.5602	22.4266	12.5375	41.7206	7.63434	0.122202	0.183017	no
TRBV30_TRBJ1-1	15.5904	8.06801	71.6081	2.98347	47.7505	53.4453	66.1982	69.6734	9012.22	0	0.369598	no
TRBV30_TRBJ2-1	1465.02	1427.26	1933.86	2108.72	24.5706	3210.65	175.525	132.532	14.1605	0.48881	0.379323	no
TRBV30_TRBJ2-3	12.3524	10.02	55.7928	4.92272	17.8485	37.4262	47.9769	32878.9	23.1493	0.244405	0.373444	no
TRBV30_TRBJ2-4	732.628	7.5475	52.1319	5.51942	26.425	34.5137	16350.1	21.4166	14.0373	0.122202	0.39392	no
TRBV30_TRBJ1-4	10.7933	4.68465	40.8562	7.60785	5728.32	36.2612	2.84184	23332.9	21.9179	0.611012	0.499974	no
TRBV30_TRBJ2-7	902.324	1032.05	2918.8	5.37024	24.6865	57.8141	0.501501	38.6611	11.944	0	0.146297	no
TRBV13-2_TRBJ2-5	20023.1	8832.13	16943	15288	9524.36	4661.68	32509.8	265.204	2299.78	150.676	0.391838	no
TRBV13-2_TRBJ1-3	8898.52	4193.28	5818.71	2077.84	2911.5	10711.5	15.045	20.8603	10651.6	9941.9	0.618344	no
TRBV13-2_TRBJ1-5	3773.59	4378.2	4554.36	3919.98	140.238	6111.69	37.9469	31.7077	56.2725	102.528	0.196269	no
TRBV13-2_TRBJ2-2	5379.16	5230.28	11967.5	5629.06	77.5365	5640	88.5985	104.997	26713.1	42.8931	0.881565	no
TRBV13-2_TRBJ1-6	2015.36	2011.02	193.737	1089.26	4286.65	9128.51	64.025	166.465	142.097	35.4387	0.995314	no
TRBV13-2_TRBJ2-3	9299.19	7309.49	8516.82	5960.82	7255.29	13356.2	62.8548	290.097	143.575	7780.63	0.287037	no
TRBV13-2_TRBJ1-1	12880.9	10010.5	45757.1	7042.33	3819.46	23359.7	163.657	226.821	4904.08	30572	0.693241	no
TRBV13-2_TRBJ2-1	18095.4	10894.8	8952.04	11002.6	16547.6	9277.48	237.043	12630.6	11009	6876.7	0.108012	no
TRBV13-2_TRBJ2-4	14844.5	12345.9	4690.26	11903.3	5122.16	13043.6	122.868	11789.5	343.792	14490.5	0.645292	no
TRBV13-2_TRBJ1-4	8291.57	6850.78	27672.5	2913.36	2472.82	13531	11.2002	4001.42	228.661	43.8707	0.295339	no
TRBV13-2_TRBJ2-7	22224.6	9602.76	37733.7	15356.2	6093.98	24382.2	7.18818	19462	7733.34	269.09	0.326651	no
TRBV6_TRBJ1-3	0	0	0.146438	0	0	0	0	0	0	0	0.373901	no
TRBV6_TRBJ2-5	0	0.130129	0	0	0	0	0	0	0	0	0.373901	no
TRBV6_TRBJ1-5	0	0	0.146438	0	0	0	0	0	0	0	0.373901	no
TRBV6_TRBJ2-2	0	0.130129	0	0	0	0	0.334334	0	0	0	0.593003	no
TRBV6_TRBJ1-6	0	0	0	0.149173	0.115899	0	0	0.139069	0	0	0.575055	no
TRBV6_TRBJ1-2	0	0	0	0.149173	0	0	0	0	0.123135	0	0.896356	no
TRBV6_TRBJ1-1	0.239852	0	0	0	0	0	0	0.278137	0	0	0.919598	no
TRBV6_TRBJ2-1	0.119926	0	0	0.149173	0	0	0.835835	0	0	0.122202	0.450188	no
TRBV6_TRBJ2-3	0	0	0.146438	0.149173	0	0	0	0	0	0	0.177832	no
TRBV6_TRBJ1-4	0.239852	0	0	0	0	0	0	0	0	0	0.373901	no
TRBV6_TRBJ2-7	0	0.390388	0.292876	0	0	0	0	0	0.123135	0	0.265488	no
TRBV21_TRBJ2-5	0.839483	541.728	0.146438	0.298347	0.115899	0.436882	0.501501	14887.4	23.5187	0	0.389094	no
TRBV21_TRBJ1-3	0.359778	2.08207	0	0	0	0	0	21.5556	14.653	0	0.213683	no
TRBV21_TRBJ1-5	0.239852	4.16414	0	0	0	0	0	34.9062	0.985076	0	0.41685	no
TRBV21_TRBJ2-2	317.444	5.72569	0	0	0	0	0	72.4548	4.06344	0	0.485265	no
TRBV21_TRBJ1-6	0.839483	1.95194	0	0	0	0	0	74.5408	3.9403	0	0.362275	no
TRBV21_TRBJ1-2	0.239852	499.566	0	0	0	0	0	135.87	6.03359	0	0.522529	no
TRBV21_TRBJ2-1	2.87823	1054.7	2.19657	1.49173	1.62259	1.45627	1.67167	84002.9	13.6679	1.34423	0.379268	no
TRBV21_TRBJ2-3	1.31919	10.9309	0	0	0	0.145627	0.167167	159.79	3419.2	0.122202	0.351119	no
TRBV21_TRBJ1-1	1.67897	10.6706	0	0.298347	0	0	0	162.988	3044.87	0.244405	0.348002	no
TRBV21_TRBJ2-4	0.719557	8.4584	0	0	0	0	0.167167	81.6333	17.1157	0	0.320799	no
TRBV21_TRBJ1-4	0.719557	5.3353	0	0	0	0	0	143.102	20.5635	0	0.321511	no
TRBV21_TRBJ2-7	0.839483	26.6765	0	0	0	0	0	280.78	7.63434	0	0.403667	no
TRBV23_TRBJ2-5	74.594	1.04103	0.292876	0.895041	0	0	0	0	0	0	0.358082	no
TRBV23_TRBJ1-3	0.119926	0	0.146438	49.3764	0	0	0	0	0.246269	0	0.373152	no
TRBV23_TRBJ1-5	0	0	0	0.298347	0	0	0	0	0	0	0.373901	no
TRBV23_TRBJ2-2	1.07933	0.520517	0.732189	83.0896	0	0	0	0	0.246269	0	0.360263	no
TRBV23_TRBJ1-6	36.8173	0.260258	0.439313	75.4818	0	0	0	0	0	0	0.206353	no
TRBV23_TRBJ1-2	34.4188	0.520517	0.439313	0.745867	0	0	0	0	0.246269	0	0.350811	no
TRBV23_TRBJ1-1	2.51845	0.910905	0.878627	0.745867	0	0	0	0	0.123135	0	0.0746968	no
TRBV23_TRBJ2-3	1.67897	1.30129	1.31794	0.149173	0	0	0	0	0	0	0.0591696	no
TRBV23_TRBJ2-1	29.262	119.459	0.732189	62.3545	0	0	0	0	47.0374	0	0.229372	no
TRBV23_TRBJ2-4	99.7785	28.1079	190.223	0.149173	0	0	0	0	0	0	0.156294	no
TRBV23_TRBJ1-4	18.3487	0.130129	0.146438	0.745867	0	0	0	0	0	0	0.344907	no
TRBV23_TRBJ2-7	27.2232	1.43142	0.585751	0.44752	0	0	0	0	0	0	0.32742	no
TRBV12-2_TRBJ1-3	20.1476	66.1057	0	18.3483	0.115899	0	0	0	0.123135	0	0.158417	no
TRBV12-2_TRBJ1-5	15.3505	26.156	0	0	0	0	0	0	0	0	0.196559	no
TRBV12-2_TRBJ2-2	43.1734	9.36931	0	57.581	0	52.8627	0	0	0	0	0.493031	no
TRBV12-2_TRBJ1-6	1.31919	0.260258	0	45.3487	58.1814	0	0	0	0	0	0.173629	no
TRBV12-2_TRBJ1-2	30.4612	27.9778	0	14.7682	404.256	0	0	0.139069	0.246269	0	0.285065	no
TRBV12-2_TRBJ2-3	31.7804	28.1079	0.146438	61.0119	0.463597	0	0	0.139069	0.123135	0.122202	0.0994066	no
TRBV12-2_TRBJ1-1	9.95387	56.0857	32.6556	53.1058	0.463597	0	0	0	0.861942	0	0.0534561	no
TRBV12-2_TRBJ2-1	66.559	64.1537	0	12.0831	0.579496	0	0	0	46.9143	0	0.316175	no
TRBV12-2_TRBJ2-4	1055.95	31.1009	0	0.298347	1.04309	0	0	0.139069	155.888	0	0.426695	no
TRBV12-2_TRBJ1-4	31.6605	0.650646	0.146438	84.1338	0.115899	0.145627	0	0	0	0	0.227445	no
TRBV15_TRBJ2-5	5364.05	2958.49	11.715	4314.1	138.5	7.86388	0.334334	0.417206	93.7054	0.244405	0.07915	no
TRBV15_TRBJ1-3	2566.54	3402.23	3.22163	84.1338	109.525	1.01939	0.668668	1.11255	6291.56	0.122202	0.986393	no
TRBV15_TRBJ1-5	1630.16	764.9	7.61477	26.4037	23.5275	0.58251	0	0	2.58583	0.122202	0.199921	no
TRBV15_TRBJ2-2	6390.86	3749.28	3.66095	72.2	68.8441	0.873764	0.167167	0.139069	22.6568	0.244405	0.189338	no
TRBV15_TRBJ1-6	3742.29	56.0857	1.90369	44.4537	78.6955	0.873764	0	0	29.4292	0.122202	0.351806	no
TRBV15_TRBJ1-2	2562.22	51.9216	1.02506	1907.03	4933.71	802.407	0	0.139069	18.8396	0.244405	0.131705	no
TRBV15_TRBJ2-3	3014.22	2524.12	2.63588	4850.52	133.632	2.33004	0.334334	0.556275	5330.49	0.244405	0.481984	no
TRBV15_TRBJ1-1	9163.07	2286.89	14.7902	5710.51	37318.6	4.36882	0.835835	0.834412	37.3098	1.95524	0.18374	no
TRBV15_TRBJ2-1	4729.17	8301.86	10.2506	39640.2	5739.67	5.24259	0.835835	0.278137	86.933	1.22202	0.176529	no
TRBV15_TRBJ2-4	2744.63	4193.15	2.92876	4152.84	74.4073	2.18441	0.334334	0.139069	64.7688	0	0.0760937	no
TRBV15_TRBJ2-7	22412	7267.85	2.48944	3231.4	2719.46	6.69886	0.501501	0.695343	4556.1	0.244405	0.197288	no
TRBV24_TRBJ1-3	0	7.93788	0.146438	0	1.04309	0	1.5045	0.278137	4.67911	0	0.773983	no
TRBV24_TRBJ2-5	7.55534	62.5922	0.292876	0.149173	0.231798	0.145627	1.17017	0.417206	53.8098	0	0.855207	no
TRBV24_TRBJ1-5	0.479704	0.520517	0.146438	0.149173	0.115899	0	1.33734	0.417206	0.123135	0	0.741872	no
TRBV24_TRBJ2-2	0.479704	1.04103	28.9947	0	0	0.145627	0.501501	0	2.09329	0	0.387465	no
TRBV24_TRBJ1-6	0.239852	46.326	0.585751	14.1715	0.115899	0	2.84184	0.139069	0.492538	0	0.263961	no
TRBV24_TRBJ1-2	11.5129	52.8325	0.292876	14.4698	0.579496	0	0.501501	0.695343	1.23135	0	0.184707	no
TRBV24_TRBJ1-1	35.3782	58.1678	0.732189	2.08843	1.73849	0.145627	4.34634	0.834412	139.388	0	0.76755	no
TRBV24_TRBJ2-1	0.479704	243.602	32.2163	0.149173	1.50669	0	214.977	1.94696	6.64926	0	0.868749	no
TRBV24_TRBJ2-3	0.119926	34.6144	0.146438	0	1.15899	0.145627	0.835835	1.94696	76.4665	0	0.62213	no
TRBV24_TRBJ2-4	0.479704	20.4303	0.292876	0.149173	0.695395	0	1.67167	0.139069	64.3994	0	0.540411	no
TRBV24_TRBJ1-4	0.839483	41.5112	0.732189	0	0	9.61141	0.167167	0.278137	4.55598	0	0.533455	no
TRBV24_TRBJ2-7	21.7066	3.51349	0.292876	0	58.1814	0	0	0.139069	76.3434	0	0.94114	no
TRBV16_TRBJ1-3	1002.58	1374.69	2.48944	1977.15	4203.89	11.2133	0.501501	1.80789	69.8173	5.62131	0.0728981	no
TRBV16_TRBJ2-5	3842.31	3500.09	538.745	1950.74	1144.62	262.712	1.83884	12732	48793	7.45435	0.342321	no
TRBV16_TRBJ1-5	465.793	543.94	1066.21	9.99462	11.5899	8.88327	0	1.11255	11.3284	1.34423	0.101917	no
TRBV16_TRBJ2-2	1692.88	2747.68	3.80738	2124.23	7.30165	8.44639	0	5.84088	40.5113	4.27709	0.080596	no
TRBV16_TRBJ1-6	325.719	16.136	0.878627	943.075	1661.76	8.73764	0	8.20505	1847.63	2.81066	0.66909	no
TRBV16_TRBJ1-2	1341.01	1491.28	1.90369	1198.46	14.2556	11.6502	0	2.92044	3167.02	9.7762	0.818368	no
TRBV16_TRBJ2-1	4922.01	2266.85	6.15039	3338.35	25.266	32.4749	0.334334	15.5757	80.8994	6129.55	0.594699	no
TRBV16_TRBJ1-1	1976.5	4956.49	1286.31	1236.05	11014.9	2686.83	0.334334	7.37064	5400.31	5185.91	0.535667	no
TRBV16_TRBJ2-4	3068.91	3901.66	3.95382	2894.26	10.1991	19.8053	0	9.03946	6452.25	4.39929	0.670802	no
TRBV16_TRBJ1-4	838.523	5291.97	4.2467	1733.4	1423.47	10249.3	0.167167	7.23157	78.3136	5.25471	0.928638	no
TRBV16_TRBJ2-7	7744.47	3414.59	2.48944	6318.54	24.5706	6835.02	0.167167	16.271	2055.61	151.287	0.43664	no
TRBV20_TRBJ1-3	288.302	45.6754	116.857	304.911	0.463597	0.728137	0	0.139069	0.615673	0.122202	0.072365	no
TRBV20_TRBJ2-5	108.413	37.4772	262.856	170.207	2.31798	1.01939	0.167167	0.556275	3.69404	0.244405	0.0693786	no
TRBV20_TRBJ1-5	0.119926	58.428	1.31794	0.149173	0.231798	85.192	0	0	0.985076	0	0.808137	no
TRBV20_TRBJ2-2	0.839483	29.7996	4.39313	0.298347	0.579496	94.8034	0	0	167.463	0	0.257245	no
TRBV20_TRBJ1-6	49.8893	0.130129	0.732189	31.7739	0.231798	93.2015	0	0.417206	395.508	0	0.350256	no
TRBV20_TRBJ1-2	149.548	157.587	0.878627	416.94	0.463597	185.238	0	0.278137	1012.41	0.122202	0.671889	no
TRBV20_TRBJ2-3	83.9483	57.387	142.484	46.0946	0.811294	184.947	0	0.695343	299.709	0.611012	0.658471	no
TRBV20_TRBJ1-1	370.452	41.9016	119.2	1.04421	1.62259	105.289	0	0.139069	1.23135	0.97762	0.294686	no
TRBV20_TRBJ2-1	150.867	40.6003	390.696	141.566	2.31798	98.881	0	0.139069	1.35448	0.733215	0.140564	no
TRBV20_TRBJ2-4	76.5128	30.7105	263.442	1.49173	0.811294	0.436882	0	0	0.492538	0	0.204866	no
TRBV20_TRBJ1-4	214.908	23.163	1.1715	63.5479	1.04309	137.035	0	602.584	0.861942	0.244405	0.510846	no
TRBV20_TRBJ2-7	346.466	156.155	258.902	106.51	808.744	382.272	0	0.417206	0.246269	510.684	0.377732	no
TRBV31_TRBJ2-5	3849.51	2883.14	6458.05	3329.25	56.7906	67.1342	102.975	14215.5	5758.26	0.244405	0.818889	no
TRBV31_TRBJ1-3	1654.98	3026.68	7310.18	1265.74	45.0848	59.5616	11362.7	7.50971	34.3545	0.366607	0.891681	no
TRBV31_TRBJ1-5	644.723	1417.5	3508.8	1269.32	3778.89	31.7468	11474.2	75.9315	6108.95	0.244405	0.582201	no
TRBV31_TRBJ2-2	46.8911	3184.52	3721.86	26.1054	10.0832	19.8053	15358.6	59.1042	17.7314	0	0.619189	no
TRBV31_TRBJ1-6	2362.18	3032.4	5772.87	939.644	32.5677	53.0084	92.2762	100.547	33.862	0	0.0742219	no
TRBV31_TRBJ2-3	2227.51	3496.18	3118.25	5593.26	53.1977	18551.8	45.4694	125.996	36.4478	0.366607	0.832366	no
TRBV31_TRBJ2-1	3922.06	517.784	7375.93	4611.4	14577.9	47.3289	181.543	12511.2	22.6568	1.34423	0.318879	no
TRBV31_TRBJ2-4	2590.88	3621.11	5946.25	4278.3	63.9763	2705.32	346.37	113.341	103.064	0.122202	0.052943	no
TRBV31_TRBJ1-4	2762.74	3659.88	4000.53	1292.44	20.5142	4288.87	16.3824	157.426	4408.71	0.244405	0.669925	no
TRBV31_TRBJ2-7	5223.74	3273.53	5063.53	7340.38	111.843	1659.42	50.6516	31605	53.071	0.733215	0.715953	no
TRBV26_TRBJ2-5	4278.36	6880.06	0.292876	3587.17	4215.6	8.30076	25.4094	0.973481	5104.42	0.48881	0.103284	no
TRBV26_TRBJ1-3	860.59	879.153	0.439313	36.6967	3078.4	4.8057	11258.9	1.80789	14129.4	0.48881	0.263586	no
TRBV26_TRBJ1-5	1662.18	804.069	0.439313	968.136	75.5663	2.76692	11991.7	0.139069	24.5038	0.244405	0.51897	no
TRBV26_TRBJ2-2	1672.85	66.2358	0.292876	23.1219	64.2081	4.07757	57.004	0.834412	5973.99	0	0.528517	no
TRBV26_TRBJ1-6	309.409	1851.48	0.146438	1214.12	79.0432	3.34943	18.2212	0.139069	71.5412	0.122202	0.136735	no
TRBV26_TRBJ1-2	3874.81	5096.25	0.292876	3136.37	14120	3.49506	20.7287	1.80789	5135.45	1.46643	0.159317	no
TRBV26_TRBJ2-1	4151.84	4243.12	0.732189	69.8132	13573.6	8.00951	148.11	3.61579	25121.4	1.46643	0.911552	no
TRBV26_TRBJ2-3	2679.87	5296.52	0.146438	1502.92	198.303	1565.79	20.8959	0.417206	251.933	0.122202	0.186136	no
TRBV26_TRBJ1-1	4208.33	5776.31	0.439313	11076.1	3180.62	10.9221	73.2192	1.80789	9633.8	0.733215	0.304773	no
TRBV26_TRBJ2-4	1007.26	1357.51	0.146438	73.6917	5526.19	8.15513	33.6006	0.695343	4519.53	0.244405	0.630411	no
TRBV26_TRBJ1-4	5797.47	1056.26	0.439313	2637.39	66.9897	1051.28	8.52552	0.834412	3777.52	0.244405	0.493104	no
TRBV26_TRBJ2-7	5534.35	1833.78	0.585751	1695.51	4795.79	15.8734	0.668668	0.695343	4724.06	0.48881	0.22961	no
TRBV1_TRBJ2-5	23163.8	29688.5	67709.2	16377.8	53980.2	27828.5	27734.9	46178.7	170437	33737.7	0.46653	no
TRBV1_TRBJ1-3	11046.8	17308.2	16137.9	6837.37	19075.5	34137.2	4950.32	86.9179	11340.4	105.094	0.58243	no
TRBV1_TRBJ1-5	11251.1	10709.9	3308.62	56.9843	40833.8	5285.11	12850.8	28383.6	4366.47	80809.3	0.444532	no
TRBV1_TRBJ2-2	9931.08	12358.4	65682	71.9016	18080.3	15724.3	33547.6	22846.8	19608.3	28290.2	0.825597	no
TRBV1_TRBJ1-6	54898.3	13743.2	45126.9	4997.61	12180.4	12078.2	81947.6	33563.9	12919.4	33210.8	0.61111	no
TRBV1_TRBJ1-2	15208.3	14686.8	9925.56	5737.66	4419.7	18096.4	13895.1	11842	5000.25	77.843	0.957998	no
TRBV1_TRBJ2-3	24585.7	40899.1	30587.8	16251.4	64141.6	34101.4	34588.7	42971	25938.4	72314.3	0.577724	no
TRBV1_TRBJ2-1	34657.8	34821.3	39174.8	11960.6	42896.3	35775.3	131838	76729.2	229.769	285.343	0.557346	no
TRBV1_TRBJ1-1	35697.7	50201.6	83743	43924.1	40012.9	77086.3	167968	26343.2	31107.1	275.811	0.763065	no
TRBV1_TRBJ2-4	19969.5	119022	81000.9	17450.8	51092.9	29947.8	89801.6	126.552	16301.7	76132.5	0.572281	no
TRBV1_TRBJ1-4	20178.9	14853.7	38153.2	168894	9089.28	44988.2	115.847	42715.4	134837	109.249	0.887486	no
TRBV1_TRBJ2-7	49601.7	15524.9	12314.4	17762.4	56707.1	27470.7	213.138	27307.9	6662.69	94.8291	0.15463	no
TRBV4_TRBJ2-5	30.2214	13.5334	10.5435	22.0777	13.792	68.008	0.668668	0.278137	24.0112	46.4369	0.505945	no
TRBV4_TRBJ1-3	7.55534	5.98595	21.5264	2.08843	27.8158	29.708	0	0	0	29.0842	0.891461	no
TRBV4_TRBJ1-5	4.67712	3.38336	3.36807	0	0.115899	18.3491	6.35235	14.185	0	0.244405	0.212955	no
TRBV4_TRBJ2-2	11.0332	13.1431	9.07914	14.3207	39.6375	32.038	0	0.139069	14.0373	25.2959	0.724027	no
TRBV4_TRBJ1-6	7.07564	7.5475	27.8232	2.2376	38.7103	33.7856	0	0.278137	44.9441	0	0.94395	no
TRBV4_TRBJ1-2	4.31734	10.5405	6.5897	11.188	78.0001	28.3973	0	47.2833	34.4777	0	0.99566	no
TRBV4_TRBJ2-3	19.3081	0	5.4182	9.84545	38.3626	13.3977	40.1201	0.417206	19.3321	53.6469	0.385118	no
TRBV4_TRBJ1-1	3.83763	10.02	101.189	13.1273	49.9525	39.1738	6.01801	23.7807	7.1418	0	0.344445	no
TRBV4_TRBJ2-1	30.2214	28.1079	22.9907	10.5913	47.7505	77.6194	0.167167	0.556275	2.46269	0.611012	0.509953	no
TRBV4_TRBJ2-4	19.548	10.6706	14.7902	0	15.5305	54.0278	31.0931	28.6481	11.4515	0	0.244098	no
TRBV4_TRBJ1-4	14.2712	11.061	6.29683	7.16033	19.7029	36.6981	0	41.7206	0.123135	0.244405	0.700987	no
TRBV4_TRBJ2-7	30.2214	19.6495	57.9894	25.5087	40.6806	72.2312	0	16.8273	2.70896	41.671	0.61167	no
TRBV5_TRBJ2-5	9932.88	28026.1	12959.9	7598.45	11615.3	22819.5	53767.6	17164.7	36422.6	10900	0.147257	no
TRBV5_TRBJ1-3	1433	479.396	2264.08	3081.33	253.471	4602.55	126.713	59.2432	5632.67	68.189	0.676783	no
TRBV5_TRBJ1-5	2350.31	2694.46	2095.53	9086.31	3553.35	6643.38	343.863	46.1708	31.153	6439.34	0.556304	no
TRBV5_TRBJ2-2	2397.2	8899.8	12555.1	1123.72	5297.75	5351.08	42974.1	10683.7	5345.76	55.9687	0.435155	no
TRBV5_TRBJ1-6	3175.76	7790.58	6682.25	30.2822	9465.6	9010.26	6894.14	6624.81	3704.5	13322.3	0.31784	no
TRBV5_TRBJ1-2	599.75	6745.25	7634.54	870.278	190.191	1489.04	10146.7	4141.46	3106.07	20101.6	0.27208	no
TRBV5_TRBJ2-6	0	0.130129	0	0	0	0	0	0	0	0	0.373901	no
TRBV5_TRBJ1-1	4243.58	18299.7	20888.9	1630.62	92528	14798.7	20948	10034.4	7067.43	12029.7	0.435027	no
TRBV5_TRBJ2-1	5252.88	12356.2	21604.7	2278.33	16515.9	10581.1	53732	20345.3	13790	7195.28	0.342386	no
TRBV5_TRBJ2-3	18981.3	12094.6	26202.6	553.434	6458.48	13096	7683.33	5324.38	16336.5	18594.4	0.903759	no
TRBV5_TRBJ2-4	4481.52	2960.57	4710.32	1208.31	7851.82	13546.8	6904.84	12942.4	2492	90.4298	0.355504	no
TRBV5_TRBJ1-4	2778.57	4718.62	4032.46	6734.88	15358.7	10751.2	137.578	20248	4888.81	9845.97	0.563763	no
TRBV5_TRBJ2-7	12407.2	4664.87	5875.52	5602.21	21481.8	10622.6	1511.52	17979.2	13148.8	37562.8	0.397883	no
TRBV13-3_TRBJ2-5	2189.25	6652.6	32.0699	10323.7	6248.59	45.2901	29.9229	25236.1	3725.31	0.611012	0.896091	no
TRBV13-3_TRBJ1-3	4097.99	877.592	4318.89	4643.17	4458.99	24.9023	2.17317	6130.29	14888.7	0.48881	0.867733	no
TRBV13-3_TRBJ1-5	2808.91	630.736	18.744	38.3376	4121.84	595.179	3.00901	26.284	20.0709	0.366607	0.167415	no
TRBV13-3_TRBJ2-2	6496.76	3420.06	21.2335	3687.42	71.3939	13.2521	4.51351	11110.9	82.2539	0.48881	0.850652	no
TRBV13-3_TRBJ1-6	3345.82	3704.65	15.8153	1223.52	1110.78	25.4848	2.84184	124.049	56.1493	0	0.0598158	no
TRBV13-3_TRBJ1-2	14185.1	4126.53	4331.78	7485.52	119.26	19107.8	6460.17	43.2504	11105.3	0.733215	0.772647	no
TRBV13-3_TRBJ1-1	8991.1	5903.44	4164.11	13935.5	15028.1	1483.65	5.34935	20906.7	90.7501	1.46643	0.31279	no
TRBV13-3_TRBJ2-3	8248.16	1729.03	23.7229	6218.15	15037.2	36.1156	7.68968	151.863	70.0635	0.855417	0.07945	no
TRBV13-3_TRBJ2-4	11727.8	1964.95	26.0659	1644.94	159.593	1258.22	7.52252	27554.8	8077.01	0.611012	0.484921	no
TRBV13-3_TRBJ1-4	6612.84	3542.38	30.6055	6443.7	2250.65	37.8631	1.17017	119.46	7302	0.733215	0.269177	no
TRBV13-3_TRBJ2-7	19130.3	74493.3	37.1952	11111	30436.9	1372.25	2.17317	123.076	5968.95	3.05506	0.117912	no
TRBV14_TRBJ2-5	1344.01	1237.14	6.29683	1122.23	1560.12	3043.9	0.167167	709.806	1497.56	7.20994	0.997299	no
TRBV14_TRBJ1-3	181.568	467.294	852.561	764.663	13.9079	384.893	0	1848.22	8.00374	1929.45	0.452897	no
TRBV14_TRBJ1-5	330.276	668.344	2.05013	4.32603	10.315	8.59202	0	6.6753	1.47761	12.8313	0.210268	no
TRBV14_TRBJ2-2	283.265	230.849	779.781	265.976	555.852	13.5433	0	7.37064	5.54105	2461.52	0.888769	no
TRBV14_TRBJ1-6	149.068	6.63659	3.66095	6.56363	4284.33	870.997	0.167167	6.11902	3.81717	8.67637	0.454024	no
TRBV14_TRBJ1-2	238.053	308.406	378.249	401.277	613.802	1263.9	0	5.00647	6.7724	6.35453	0.636285	no
TRBV14_TRBJ1-1	658.394	676.802	819.466	1265.44	1589.21	3052.35	0.334334	11077	570.359	5430.8	0.207215	no
TRBV14_TRBJ2-1	1767.47	1191.85	991.384	320.126	996.501	1898.98	0	19.3305	663.326	11088.8	0.473192	no
TRBV14_TRBJ2-3	1906.7	13.2732	6.44326	1257.68	919.66	874.638	0.167167	20.7212	10.959	30.0618	0.171962	no
TRBV14_TRBJ2-4	1692.76	534.831	7.32189	497.643	19.8188	463.823	0.167167	8.90039	963.158	7.08774	0.493202	no
TRBV14_TRBJ1-4	737.306	353.691	1282.36	1254.55	1111.7	1100.21	0.334334	1905.38	12.3135	6.23232	0.454212	no
TRBV14_TRBJ2-7	1044.08	2189.68	889.024	1178.32	5737.94	2267.56	0.334334	11.8208	1526.13	2888.5	0.449492	no
TRBV29_TRBJ1-3	1882.72	38.258	1001.63	2547.88	15.5305	9.90266	57.6726	13.3506	13.9142	0.122202	0.0977882	no
TRBV29_TRBJ2-5	4933.52	2328.27	3370.12	10106.8	15.7623	563.724	215.311	111.95	33.9851	0.733215	0.0786938	no
TRBV29_TRBJ1-5	1418.25	3204.95	833.378	1850.05	5.91086	9.17453	13223.6	15.2976	3.07836	0.122202	0.680744	no
TRBV29_TRBJ2-2	2056.37	3255.18	21.8192	2294.74	6.72215	7.427	151.621	33.7937	7.88061	0.122202	0.0838366	no
TRBV29_TRBJ1-6	2196.81	320.118	8.49339	1335.1	2639.84	9.90266	104.145	52.568	8.12688	0	0.0685822	no
TRBV29_TRBJ1-2	2497.34	554.22	12.7401	64.8905	11.8217	2213.97	2232.01	9374.9	2351.13	0.244405	0.182205	no
TRBV29_TRBJ2-1	4838.54	3698.79	2235.37	10866.5	1212.65	846.969	22219.2	6392.29	25.4888	0.611012	0.782987	no
TRBV29_TRBJ1-1	38936.2	10609.3	43.9313	1375.53	1956.38	1351.42	17877	8758.54	22.1642	0.611012	0.56264	no
TRBV29_TRBJ2-4	3200.23	5193.98	1251.31	2387.52	10.0832	12.8152	5719.12	35.7406	5334.93	0.48881	0.910507	no
TRBV29_TRBJ1-4	4318.3	2265.29	22.405	1748.46	9.61963	15.8734	4748.88	62.72	10.3433	0.366607	0.585388	no
TRBV29_TRBJ2-7	4205.69	1178.32	1142.8	5792.55	1446.89	1987.23	130.056	8740.33	20.0709	0.48881	0.774793	no
TRBV3_TRBJ2-5	1244.95	1903.53	1510.07	681.424	1902.48	3735.63	1743.55	1445.62	3189.31	3.54387	0.449831	no
TRBV3_TRBJ1-3	236.015	348.356	235.033	493.764	6.37445	6.69886	3.00901	2.36417	769.96	3.17726	0.559008	no
TRBV3_TRBJ1-5	257.122	662.098	2.92876	5.0719	7.41755	6.84449	7.02102	2.2251	5.78732	0.48881	0.228448	no
TRBV3_TRBJ2-2	652.038	245.944	7.17545	6.26529	639.763	4.8057	7.85685	11.2646	26.9665	1.83304	0.105588	no
TRBV3_TRBJ1-6	296.817	417.455	2.78232	11.9339	16.8054	12.9608	4.01201	1126.32	1704.3	0.48881	0.310204	no
TRBV3_TRBJ1-2	372.371	1049.36	4.10026	15.8124	12.0535	8.59202	1729.68	10.0129	388.613	4.64369	0.735353	no
TRBV3_TRBJ2-3	1045.88	2324.5	6.44326	627.871	756.358	11.9414	11.7017	1462.86	1673.28	8.79858	0.572572	no
TRBV3_TRBJ1-1	416.024	1324.2	10.69	20.4368	589.231	18.6403	12.5375	11.4036	679.579	1920.17	0.902279	no
TRBV3_TRBJ2-1	1542.97	7163.22	1405.22	1174.29	1630.01	772.116	1726.84	1679.53	4107.64	1978.95	0.692345	no
TRBV3_TRBJ2-4	1458.54	2013.1	7.02902	222.418	14.4874	13.5433	1887.48	10.4301	5486.38	2.32185	0.546874	no
TRBV3_TRBJ1-4	366.974	817.862	8.34696	1250.82	949.33	10.7764	1.5045	1856.98	33.862	3.54387	0.512628	no
TRBV3_TRBJ2-7	1394.62	1942.7	12.0079	3502.89	683.921	24.611	0.334334	27.3965	969.315	15.0309	0.0944843	no

## Sheet: TRB VDJ
VDJ combination	Ctrl-1	Ctrl-2	Ctrl-3	Ctrl-4	Ctrl-5	CCl4-1	CCl4-2	CCl4-3	CCl4-4	CCl4-5	P value	sig
TRBV31_TRBJ1-2_TRBD2	33.0609	63.2712	68.8135	49.1665	0.963027	7.04246	0	4.44605	4.67489	0	0.0304962	down
TRBV13-3_TRBJ1-1_TRBD1	8611.74	6750.24	6866.02	26499.7	7952.99	72.3026	3.71335	571.762	60.4618	1.6242	0.0423261	down
TRBV1_TRBJ1-3_TRBD1	13822.6	20260.8	761.668	18697.5	16325.9	178.409	147.709	61.8001	162.063	137.516	0.0164274	down
TRBV29_TRBJ1-5_TRBD1	1537.95	1572.35	2153.67	2248.55	1.60504	11.2679	90.3582	8.8921	3.11659	0	0.0211764	down
TRBV1_TRBJ2-7_TRBD1	15778.5	7960.91	9106.59	10633.6	15446.6	265.266	3.30075	148.943	65.7601	63.3439	0.00195504	down
TRBV16_TRBJ2-5_TRBD2	2714.11	1864.67	1414.41	2398.78	6.74119	18.3104	0	721.594	435.699	0.541401	0.0353176	down
TRBV20_TRBJ2-4_TRBD1	1.24758	0.912565	1.9661	1.09259	0.321009	0.938995	0	0	0.311659	0	0.0320994	down
TRBV13-1_TRBJ1-6_TRBD1	605.388	61.7502	20.4475	291.175	52.6454	4748.5	0	15275.3	33.3475	76.8789	0.265972	no
TRBV26_TRBJ2-5_TRBD1	6138.41	7319.08	0.786441	124.555	165.962	10.3289	26.406	1.77842	11947.8	1.6242	0.906524	no
TRBV21_TRBJ2-2_TRBD2	807.496	3.65026	0	0	0	0	0	80.9181	0.623318	0	0.418046	no
TRBV26_TRBJ1-6_TRBD2	7.79738	7.30052	0	8.19442	0.642018	2.34749	0	0	1.24664	0	0.0898654	no
TRBV20_TRBJ2-5_TRBD2	13.0996	0.912565	195.43	405.897	4.81513	0.469497	0	0.444605	1.86995	1.0828	0.195722	no
TRBV20_TRBJ2-3_TRBD1	211.153	1.21675	150.21	2.73147	0.321009	0.938995	0	1.77842	1.5583	0	0.183202	no
TRBV1_TRBJ1-4_TRBD2	90.7615	2141.18	220.203	30.5925	15.7294	364.33	57.3506	239.198	101.601	2.1656	0.450459	no
TRBV5_TRBJ1-3_TRBD1	129.748	137.189	180.881	2279.69	144.454	4880.43	105.624	12.4489	426.038	88.2484	0.630653	no
TRBV14_TRBJ2-4_TRBD1	686.481	1004.13	2.35932	15.2963	20.5446	1408.96	0	5.77987	9.97309	1.0828	0.86747	no
TRBV21_TRBJ1-1_TRBD2	0.311895	2.7377	0	0	0	0	0	7.11368	4.67489	0	0.320945	no
TRBV1_TRBJ2-1_TRBD2	8514.74	18943.9	40490.7	9820.74	19338.5	40036.4	87329.3	55126.6	238.731	70.9235	0.377111	no
TRBV17_TRBJ1-3_TRBD1	3.74274	2.43351	0	2.73147	659.352	0	0	0	1.5583	0	0.367695	no
TRBV30_TRBJ2-1_TRBD1	3704.07	3259.07	84.1491	7580.93	5.77816	35.2123	21.8675	84.9196	9.03811	0.541401	0.106681	no
TRBV14_TRBJ1-1_TRBD1	25.2635	19.4681	1097.87	3495.74	110.427	82.6316	0.825189	34821.5	1396.54	11614.1	0.266062	no
TRBV2_TRBJ1-1_TRBD2	0	0	0	0	0	0	0	0	0.311659	0	0.373901	no
TRBV20_TRBJ1-4_TRBD2	0	0.304188	0	0	1.92605	0	0	1.77842	0	0.541401	0.972804	no
TRBV24_TRBJ2-1_TRBD2	0	127.455	0.786441	0	0	0	2.47557	0.444605	0	0	0.380533	no
TRBV13-1_TRBJ1-1_TRBD1	5788.77	1590.3	769.532	7163.02	174.308	9483.85	0.412594	9537.22	30.2309	474.267	0.773165	no
TRBV13-1_TRBJ2-4_TRBD1	1039.86	66.9214	59.7695	4196.64	49.4354	1775.17	0.825189	61.8001	12994.3	2.707	0.510654	no
TRBV19_TRBJ2-4_TRBD1	0.311895	1.21675	0	0	0	0	162.562	0	0.623318	0	0.375896	no
TRBV3_TRBJ2-1_TRBD1	1283.76	6682.71	6.68474	945.637	1068.32	20.1884	22.2801	28.0101	73.8632	16.7834	0.174426	no
TRBV30_TRBJ1-1_TRBD2	0	0.608377	47.5797	0	0.321009	7.51196	25.5809	5.77987	419.805	0	0.375879	no
TRBV31_TRBJ1-4_TRBD2	13.4115	12.7759	40.1085	12.5648	3.85211	139.441	8.66448	24.4533	87.2645	0	0.259086	no
TRBV31_TRBJ1-1_TRBD2	58.0125	41.3696	2613.34	49.1665	10.5933	56.3397	2.06297	4.00145	14.3363	0	0.354094	no
TRBV1_TRBJ1-5_TRBD1	3134.55	5675.55	2758.83	37.6944	53988.9	6934.48	30857.5	199.628	52.3587	248732	0.415961	no
TRBV3_TRBJ1-6_TRBD2	4.36653	2.7377	1.9661	0.546295	9.30926	0.938995	1.23778	17.3396	12.1547	0	0.53472	no
TRBV19_TRBJ2-7_TRBD1	33.6847	6.38796	0.786441	27.861	2.24706	0	0.412594	4.00145	1.5583	0	0.132414	no
TRBV29_TRBJ1-1_TRBD2	53.9579	1645.66	2.75254	28.4073	0.642018	6.10347	110.163	10.2259	4.36323	0	0.380859	no
TRBV13-3_TRBJ1-5_TRBD1	3060	1278.81	17.6949	26.7685	114.279	1752.63	5.36373	3.55684	10.5964	0	0.454876	no
TRBV3_TRBJ2-1_TRBD2	1340.21	3036.1	1559.51	792.674	25.0387	16.4324	71.7914	23.1195	5752.29	27.6114	0.894971	no
TRBV26_TRBJ1-3_TRBD1	2117.14	75.7429	1.17966	65.0091	5444.95	1.40849	27362.4	5.33526	34914.5	2.1656	0.231361	no
TRBV5_TRBJ1-2_TRBD2	7.79738	1707.41	33.0305	8.74072	4.81513	27.7003	117.589	28.0101	52.3587	49.2675	0.429934	no
TRBV23_TRBJ2-4_TRBD2	2.18327	1.52094	0.39322	0.546295	0	0	0	0	0	0	0.08162	no
TRBV6_TRBJ1-3_TRBD1	0	0	0.39322	0	0	0	0	0	0	0	0.373901	no
TRBV13-3_TRBJ2-1_TRBD2	4917.65	4085.55	15227.8	249.657	105.612	32.8648	7.83929	69.803	111.574	0	0.151807	no
TRBV5_TRBJ2-5_TRBD1	3229.67	7875.13	169.478	213.055	424.695	35071.5	48741.8	24443.1	327.554	65.5095	0.113943	no
TRBV13-2_TRBJ1-2_TRBD1	11784.3	5269.76	10961.4	9055.39	720.986	9632.21	104.799	97.8131	3180.17	731.974	0.116998	no
TRBV14_TRBJ1-4_TRBD1	1071.67	810.966	1338.13	2989.87	40.4471	2438.57	0.412594	26.2317	1.5583	10.828	0.303995	no
TRBV13-1_TRBJ2-1_TRBD1	245.15	157.265	4179.54	2574.14	228.237	2697.26	0.825189	76.0275	16558.8	1222.48	0.45858	no
TRBV26_TRBJ1-3_TRBD2	14.6591	2.43351	0	7.10183	17.9765	0.469497	2.47557	0	18.6995	0	0.435912	no
TRBV29_TRBJ2-1_TRBD1	6212.64	2515.33	12.583	5127.52	18.6185	18.7799	15911.7	132.937	30.5426	0	0.902107	no
TRBV21_TRBJ2-1_TRBD1	0.62379	1126.41	0	0	0	0	0.412594	398.811	4.67489	0	0.571397	no
TRBV29_TRBJ2-7_TRBD2	1194.25	931.121	18.4814	7195.25	17.9765	23.9444	107.687	5.77987	1.24664	0	0.244367	no
TRBV6_TRBJ1-5_TRBD1	0	0	0.39322	0	0	0	0	0	0	0	0.373901	no
TRBV23_TRBJ2-7_TRBD1	0.311895	0	0	0.546295	0	0	0	0	0	0	0.198389	no
TRBV14_TRBJ1-2_TRBD1	12.1639	409.742	992.488	752.248	26.6437	25.3529	0	5.33526	7.47982	14.0764	0.0926207	no
TRBV13-2_TRBJ1-4_TRBD2	80.157	82.435	81.7898	71.5646	11.5563	123.008	21.8675	37.7914	51.7354	7.03821	0.501698	no
TRBV4_TRBJ2-4_TRBD1	0	0	0	0	0	46.4802	0	0	0.623318	0	0.366777	no
TRBV12-1_TRBJ2-7_TRBD2	11428.5	5377.75	0.39322	3379.93	75.1161	0.469497	0	3.11224	24.9327	2670.73	0.173403	no
TRBV12-1_TRBJ2-4_TRBD2	182.771	2458.45	0.39322	60.6387	1.92605	0	0	14.672	20640.9	1.6242	0.435061	no
TRBV21_TRBJ2-7_TRBD2	0.311895	10.3424	0	0	0	0	0	6.22447	1.24664	0	0.797594	no
TRBV23_TRBJ2-3_TRBD1	0.935685	0.304188	1.17966	0	0	0	0	0	0	0	0.118148	no
TRBV13-2_TRBJ1-3_TRBD2	75.7905	64.1837	97.9118	23.4907	17.0135	107.984	7.0141	0	59.8385	89.3312	0.917606	no
TRBV16_TRBJ1-1_TRBD1	4193.12	3136.79	23.5932	2248.55	7769.38	6931.19	0	6.66908	38.9574	22432.9	0.61946	no
TRBV6_TRBJ1-4_TRBD1	0.311895	0	0	0	0	0	0	0	0	0	0.373901	no
TRBV12-1_TRBJ1-5_TRBD2	9.04496	16.122	0	6.55554	0	0	0	4.44605	1.86995	0	0.172091	no
TRBV26_TRBJ2-3_TRBD2	79.2214	127.455	0	54.6295	31.1379	60.0957	0.412594	0	33.9708	0	0.159775	no
TRBV5_TRBJ1-3_TRBD2	20.897	12.1675	93.5864	27.3147	12.5193	46.9497	11.9652	5.77987	61.7085	14.0764	0.790805	no
TRBV20_TRBJ1-3_TRBD2	0.62379	0	1.17966	0.546295	0	0	0	0	0	0.541401	0.193257	no
TRBV26_TRBJ2-2_TRBD2	38.0512	25.856	0	19.6666	21.1866	1.40849	9.90226	0	125.287	0	0.812519	no
TRBV1_TRBJ1-2_TRBD1	21825.8	2497.99	11502.5	10512.9	126.156	11354.8	33696.2	96.9239	85.3946	119.65	0.977446	no
TRBV30_TRBJ1-4_TRBD1	8.42117	2.43351	19.661	1.09259	48.1513	41.7853	0	292.55	9.66143	0	0.405061	no
TRBV4_TRBJ2-2_TRBD2	6.5498	7.9089	0	0	39.4841	61.0347	0	0	33.9708	111.529	0.228208	no
TRBV13-2_TRBJ1-5_TRBD1	1351.13	1742.69	2548.85	2427.73	91.4875	2724.02	22.6927	10.2259	9.34977	331.337	0.182017	no
TRBV13-1_TRBJ1-4_TRBD1	7910.91	3802.05	1608.66	204.861	271.252	6039.15	0	27.1209	13.0897	125.064	0.442593	no
TRBV13-1_TRBJ2-7_TRBD1	10871.7	1151.96	4188.98	144.768	290.513	4680.89	0.825189	46.6835	5173.85	35350.2	0.450893	no
TRBV21_TRBJ2-3_TRBD1	0.311895	4.86701	0	0	0	0	0	31.567	48.9305	0	0.215466	no
TRBV23_TRBJ1-4_TRBD1	0.62379	0	0	0	0	0	0	0	0	0	0.373901	no
TRBV16_TRBJ2-2_TRBD1	1735.7	59.9251	2.75254	1794.03	6.42018	7.04246	0	0.444605	8.41479	16.242	0.170033	no
TRBV12-2_TRBJ1-6_TRBD1	0	0	0	0	14.1244	0	0	0	0	0	0.373901	no
TRBV13-1_TRBJ1-2_TRBD2	20.2732	46.845	41.2881	56.8147	63.5598	22.0664	0	0	42.3856	112.611	0.660013	no
TRBV17_TRBJ1-1_TRBD2	0.935685	3.04188	0.39322	0.546295	2.56807	0.938995	0	0	0.311659	0	0.0840457	no
TRBV16_TRBJ2-4_TRBD2	833.384	3494.52	3.9322	921.6	3.5311	20.1884	0	7.11368	3398.33	0	0.705088	no
TRBV23_TRBJ1-1_TRBD1	1.55948	0.304188	0	1.63888	0	0	0	0	0	0	0.132241	no
TRBV15_TRBJ1-2_TRBD2	18.0899	7.60471	0	4.91665	11.2353	0.469497	0	0	1.5583	0	0.0586485	no
TRBV19_TRBJ1-6_TRBD2	0	0.304188	0	0	0	1.40849	0.412594	0.444605	0	0	0.20518	no
TRBV29_TRBJ2-4_TRBD1	3650.42	1400.48	7.86441	2921.04	8.66724	7.51196	13392.4	62.2447	13085	2.1656	0.32077	no
TRBV29_TRBJ1-5_TRBD2	14.6591	25.2476	1.17966	2052.43	0	0	208.36	0.88921	0	0.541401	0.409758	no
TRBV21_TRBJ2-7_TRBD1	0.311895	3.95445	0	0	0	0	0	286.326	3.11659	0	0.374503	no
TRBV2_TRBJ1-1_TRBD1	0.311895	26.7686	27.5254	14.2037	0.321009	42.2548	1.23778	0	0	0	0.633932	no
TRBV12-2_TRBJ2-4_TRBD1	53.646	0	0	0	0.963027	0	0	0	1.86995	0	0.379491	no
TRBV5_TRBJ2-3_TRBD2	4709.62	6971.08	14832.7	1723.01	188.753	11151	158.436	125.379	266.157	1039.49	0.378091	no
TRBV5_TRBJ1-4_TRBD1	4502.52	2529.33	202.902	4296.61	26034.8	9146.28	65.6025	44610.3	6949.37	302.102	0.638479	no
TRBV21_TRBJ2-5_TRBD2	0.62379	1232.27	0	0	0	0	0	180.51	15.583	0	0.449994	no
TRBV14_TRBJ1-2_TRBD2	2.18327	2.43351	2.75254	7.10183	0.963027	5.63397	0	0	0.934977	0	0.275935	no
TRBV14_TRBJ1-3_TRBD2	1.87137	8.82146	35.783	4.37036	2.24706	1.87799	0	0	0.623318	4.33121	0.223391	no
TRBV1_TRBJ2-3_TRBD1	9328.16	8612.79	15048.5	46631.7	116121	241.791	35969.6	42381.1	31358.8	1070.89	0.479735	no
TRBV16_TRBJ2-5_TRBD1	54.5816	2398.22	1.9661	51.898	3059.54	20.1884	0	13.3382	1474.15	4.33121	0.312576	no
TRBV3_TRBJ1-1_TRBD2	5.92601	19.7722	3.53898	7.10183	9.95127	6.57296	0.825189	0.88921	41.7623	0	0.933017	no
TRBV2_TRBJ2-7_TRBD1	13.7234	0	0.786441	28.9536	0.321009	0.469497	0	0	0.311659	0	0.204184	no
TRBV20_TRBJ1-6_TRBD1	126.006	0.304188	0	111.444	0	1.40849	0	0.88921	2.18161	0	0.184718	no
TRBV2_TRBJ1-2_TRBD1	11.2282	8.82146	11.4034	0	0	0	45.3854	0	0	0	0.780663	no
TRBV31_TRBJ2-2_TRBD2	11.2282	59.3167	90.8339	8.19442	2.88908	15.9629	95.3093	30.6778	14.648	0	0.898494	no
TRBV26_TRBJ1-1_TRBD1	1925.33	1475.01	0.39322	33837	419.88	11.2679	63.1269	0.444605	306.984	0.541401	0.32089	no
TRBV20_TRBJ2-4_TRBD2	107.916	54.4497	145.098	2.18518	0.963027	0	0	0	0	0	0.0956879	no
TRBV1_TRBJ2-2_TRBD2	1086.64	5562.08	9886.74	27.861	122.946	14184	36478.3	124.934	16570.3	556.019	0.203008	no
TRBV5_TRBJ1-5_TRBD2	29.63	26.1602	24.7729	49.1665	21.1866	80.2841	70.141	12.4489	28.361	84.4585	0.167212	no
TRBV21_TRBJ2-5_TRBD1	0.62379	10.0382	0	0	0	0	0	196.071	4.36323	0	0.385912	no
TRBV29_TRBJ1-6_TRBD2	11.2282	4.25864	1.9661	7.10183	0.642018	1.40849	27.2312	3.55684	0.311659	0	0.802748	no
TRBV19_TRBJ2-1_TRBD1	1.24758	91.5607	0	29.4999	44.6202	0	199.283	2.22303	0	0	0.878556	no
TRBV15_TRBJ1-3_TRBD1	2361.05	6433.58	4.71864	104.889	40.4471	0.469497	0.412594	0.444605	184.502	0	0.232062	no
TRBV5_TRBJ2-7_TRBD2	8359.41	1761.25	5054.45	249.657	4410.02	14615	2296.5	82.2519	636.719	67623.7	0.369788	no
TRBV17_TRBJ1-6_TRBD1	1.87137	1.82513	0	1.63888	0.963027	0.469497	0	0	0	1.0828	0.0578882	no
TRBV13-1_TRBJ2-2_TRBD2	111.658	2324.61	160.041	2340.87	12.1983	2240.44	0	1.77842	52.0471	7.03821	0.475886	no
TRBV24_TRBJ2-3_TRBD1	0	0.912565	0	0	0.321009	0	0	0	1.24664	0	0.993423	no
TRBV23_TRBJ2-7_TRBD2	1.24758	2.12932	1.17966	0.546295	0	0	0	0	0	0	0.046605	no
TRBV21_TRBJ2-3_TRBD2	0.62379	4.25864	0	0	0	0	0	35.5684	10.2847	0	0.301611	no
TRBV12-1_TRBJ1-2_TRBD1	5132.23	5643.91	1.17966	372.573	16.3715	0.469497	0	170.284	44.5672	239.299	0.172715	no
TRBV19_TRBJ1-2_TRBD2	0	0.304188	0	0	0	0	0	0.444605	0.311659	0	0.449843	no
TRBV31_TRBJ1-5_TRBD2	7.79738	17.3387	101.451	29.4999	17.9765	13.1459	0	3.11224	40.8273	0	0.260467	no
TRBV14_TRBJ1-5_TRBD1	7.17359	305.405	3.14576	6.55554	8.98825	8.45095	0	13.7828	0	41.1465	0.422822	no
TRBV13-2_TRBJ1-6_TRBD1	1688.6	1172.95	202.508	60.0924	277.994	4612.34	31.7698	340.568	10.2847	93.6624	0.738481	no
TRBV15_TRBJ2-5_TRBD1	7879.41	91.8649	2.35932	206.499	74.7951	6.57296	0	0.444605	4.05157	0.541401	0.349487	no
TRBV12-1_TRBJ1-4_TRBD1	3224.06	167.304	5.8983	20032.1	12.5193	0.469497	0.825189	42.6821	10.5964	73351.7	0.541958	no
TRBV16_TRBJ1-1_TRBD2	27.7587	1433.94	20.4475	31.1388	9.30926	60.5652	0	0.88921	25.2444	7.57961	0.369114	no
TRBV20_TRBJ1-3_TRBD1	499.968	70.8759	166.332	961.479	0.321009	0	0	0	0.934977	0	0.128186	no
TRBV12-2_TRBJ2-7_TRBD1	35.8679	28.5937	0	2.18518	12.5193	0	0	0	0	0	0.0900435	no
TRBV13-2_TRBJ2-2_TRBD1	6857.95	206.848	8221.84	155.694	85.3884	2612.28	68.0781	13.7828	225.641	122.357	0.248517	no
TRBV6_TRBJ2-7_TRBD2	0	0.304188	0	0	0	0	0	0	0	0	0.373901	no
TRBV2_TRBJ1-3_TRBD2	0	0	0	0	0	0.469497	0	0	0	0	0.373901	no
TRBV12-2_TRBJ1-2_TRBD2	0	29.5063	0	0	0	0	0	0	0.311659	0	0.378472	no
TRBV26_TRBJ2-7_TRBD2	1959.33	190.422	0.39322	5925.11	160.504	5.16447	0.412594	0	110.016	0	0.223335	no
TRBV21_TRBJ1-4_TRBD1	0.935685	4.86701	0	0	0	0	0	120.488	10.2847	0	0.350669	no
TRBV5_TRBJ1-1_TRBD1	6172.4	10681	18646.9	180.277	43230.6	12278.3	642.409	819.852	8521.69	777.452	0.217321	no
TRBV19_TRBJ2-4_TRBD2	46.4724	27.377	22.0203	0	0	0	0.412594	0	0.623318	0	0.0979328	no
TRBV24_TRBJ1-5_TRBD1	0.311895	0	0	0	0	0	0	0	0.311659	0	0.999586	no
TRBV3_TRBJ2-2_TRBD2	730.77	15.2094	1.17966	3.82406	1725.74	0.938995	5.77632	8.00289	21.1928	0	0.222232	no
TRBV20_TRBJ2-1_TRBD2	5.61411	90.9523	605.559	2.18518	4.81513	1.40849	0	0	0	1.6242	0.294447	no
TRBV12-2_TRBJ1-1_TRBD2	19.9613	3.65026	0	0	0	0	0	0	0	0	0.289904	no
TRBV20_TRBJ1-1_TRBD2	4.05464	0.304188	1.17966	0	0	0	0	0	0.311659	1.0828	0.349396	no
TRBV13-1_TRBJ2-3_TRBD2	68.6169	3792.62	222.956	2876.24	130.651	6432.58	0	51.1296	14.648	16.242	0.941348	no
TRBV17_TRBJ1-3_TRBD2	0.311895	0.304188	0	0	0.321009	0	0	0	0.311659	0	0.242197	no
TRBV24_TRBJ2-7_TRBD1	53.0222	0.912565	0	0	1.92605	0	0	0	3.42825	0	0.373636	no
TRBV13-2_TRBJ2-7_TRBD2	10103.2	4077.95	10298	19409.9	286.019	19891.7	4.53854	559.313	30.5426	144.554	0.384655	no
TRBV5_TRBJ2-1_TRBD1	5392.98	4237.95	2796.19	130.564	6893.02	9953.35	36951.1	37292.1	304.803	493.758	0.194365	no
TRBV24_TRBJ2-3_TRBD2	0	17.3387	0	0	0	0.469497	0	0	0.934977	0	0.41044	no
TRBV5_TRBJ1-5_TRBD1	4413.32	1446.11	106.956	86.3146	109.143	13690.1	132.03	19.5626	7.16816	27889.7	0.271157	no
TRBV4_TRBJ1-1_TRBD2	0	0	0	0	0.321009	0	0	0.444605	0	0	0.827878	no
TRBV20_TRBJ1-6_TRBD2	0.311895	0	0	1.63888	0	0	0	0	0	0	0.287097	no
TRBV13-3_TRBJ1-6_TRBD1	65.1861	1280.33	9.43729	25.1296	121.983	13.1459	0.825189	113.374	7.79148	0	0.329057	no
TRBV15_TRBJ1-5_TRBD1	1988.33	233.921	0.786441	4.91665	7.06219	0.938995	0	0	0.934977	0	0.313698	no
TRBV17_TRBJ2-1_TRBD1	472.833	121.675	0	1.63888	0.642018	0.469497	0	0	0.934977	0.541401	0.263029	no
TRBV16_TRBJ2-2_TRBD2	763.831	3150.17	3.53898	55.7221	1.60504	7.04246	0	11.5597	19.6345	0	0.263849	no
TRBV30_TRBJ1-3_TRBD2	0.62379	0.608377	14.5491	0.546295	0	2.81698	2.47557	0.444605	1.24664	0	0.548956	no
TRBV12-2_TRBJ2-1_TRBD2	41.7939	34.6775	0	0	0	0	0	0	0.311659	0	0.181673	no
TRBV29_TRBJ2-3_TRBD1	4122.01	1218.88	5472.05	96.1479	18.6185	0.469497	89.533	50.685	14.0247	0	0.123686	no
TRBV14_TRBJ2-3_TRBD2	440.708	8.21309	1.9661	9.28701	2421.69	42.2548	0	3.55684	1.86995	11.3694	0.29501	no
TRBV1_TRBJ2-4_TRBD1	4055.26	14411.5	389.288	162.25	25280.7	12528.1	330.488	58.2433	180.451	497.547	0.302428	no
TRBV3_TRBJ2-3_TRBD2	1607.51	586.171	5.8983	25.1296	10.5933	9.85945	1.23778	25.3425	2305.34	0.541401	0.970277	no
TRBV21_TRBJ2-2_TRBD1	5.30222	4.25864	0	0	0	0	0	2.66763	2.49327	0	0.535617	no
TRBV24_TRBJ1-3_TRBD1	0	16.122	0	0	1.28404	0	2.47557	0	7.16816	0	0.671096	no
TRBV29_TRBJ1-3_TRBD2	6.2379	3.34607	5.50508	29.4999	0.963027	0	9.07708	0	0	0	0.241578	no
TRBV13-2_TRBJ1-5_TRBD2	47.72	2702.41	41.6813	69.3795	4.17311	83.5705	15.266	1.33382	1.86995	21.656	0.361361	no
TRBV17_TRBJ1-2_TRBD1	146.279	0.608377	0	5.46295	1.60504	0	0	0	0.311659	4.33121	0.359748	no
TRBV5_TRBJ2-1_TRBD2	206.163	7410.64	28405.1	5096.39	592.261	10348.2	28164.5	25852.5	10360.8	29689.9	0.102348	no
TRBV26_TRBJ1-4_TRBD2	38.3631	10.9508	0	33.324	0.642018	0.938995	0	0	13.713	0	0.17072	no
TRBV30_TRBJ2-4_TRBD2	23.0802	7.30052	53.0847	4.91665	0.963027	15.0239	379.587	4.00145	4.36323	0	0.450846	no
TRBV24_TRBJ2-4_TRBD2	0.62379	0.608377	0	0	0	0	0.412594	0	2.18161	0	0.570871	no
TRBV19_TRBJ1-6_TRBD1	0.935685	29.2021	0	0	40.4471	710.819	0.825189	0	0	0.541401	0.417999	no
TRBV4_TRBJ1-5_TRBD2	0	0	0	0	0	0	0	0	0	0.541401	0.373901	no
TRBV26_TRBJ2-5_TRBD2	2198.86	3680.37	0	7903.8	55.5345	6.57296	7.83929	0.88921	469.047	0	0.141085	no
TRBV17_TRBJ2-5_TRBD2	115.401	298.105	0	5.46295	0.642018	0	0	0	1.5583	0	0.222084	no
TRBV4_TRBJ2-7_TRBD2	21.5208	7.30052	28.3119	16.3888	59.3866	1.87799	0	0	6.8565	81.2101	0.652368	no
TRBV1_TRBJ1-2_TRBD2	83.8998	78.1764	48.7593	129.472	18.6185	104.228	182.367	24.0087	112.197	1.6242	0.738189	no
TRBV14_TRBJ1-4_TRBD2	0.62379	2.12932	0	1.63888	4.49412	5.63397	0	4.44605	8.72645	3.24841	0.155322	no
TRBV29_TRBJ1-4_TRBD2	8.73306	18.8597	3.9322	18.574	0	0.938995	122.128	18.2288	0.934977	0	0.482988	no
TRBV5_TRBJ2-4_TRBD1	1566.03	93.3858	90.4407	86.8609	7263.47	3861.62	275.613	235.196	142.117	20.0318	0.582891	no
TRBV3_TRBJ1-4_TRBD2	9.98064	8.82146	1.9661	12.0185	3.5311	0.469497	1.23778	3.55684	28.9843	0	0.946751	no
TRBV17_TRBJ2-7_TRBD1	255.13	57.1874	0.39322	276.425	1.92605	0	0	0	0	0.541401	0.125838	no
TRBV2_TRBJ1-5_TRBD2	0	0	0	0	0	0.469497	0	0	0	0	0.373901	no
TRBV13-3_TRBJ2-1_TRBD1	14117.3	4171.94	51.1186	10712.3	145.096	27.2309	8.66448	117.376	220.655	1.0828	0.111972	no
TRBV6_TRBJ1-1_TRBD1	0	0	0	0	0	0	0	0.444605	0	0	0.373901	no
TRBV17_TRBJ2-2_TRBD2	305.345	0.912565	0.39322	706.906	16.0504	0	0	0.444605	832.13	1.6242	0.861167	no
TRBV13-3_TRBJ2-5_TRBD2	178.092	3174.81	14.9424	3100.22	77.3631	23.0054	15.6786	100.481	8964.25	0.541401	0.801397	no
TRBV13-2_TRBJ2-5_TRBD1	12568.1	7340.06	376.312	4458.86	20890	392.5	638.283	130.269	88.1995	11.3694	0.0666388	no
TRBV17_TRBJ2-5_TRBD1	271.973	286.241	0	7.10183	1.60504	442.267	0	0	1.24664	0.541401	0.831187	no
TRBV12-2_TRBJ2-1_TRBD1	53.0222	83.3476	0	0	0	0	0	0	1.5583	0	0.195704	no
TRBV13-1_TRBJ2-2_TRBD1	995.257	78.7848	153.356	2421.18	18.2975	123.008	0	11.5597	39.5807	82.2929	0.210693	no
TRBV23_TRBJ2-1_TRBD2	0	268.902	0.786441	0.546295	0	0	0	0	0	0	0.371248	no
TRBV21_TRBJ1-2_TRBD1	0.311895	1138.27	0	0	0	0	0	164.504	9.34977	0	0.446903	no
TRBV20_TRBJ2-3_TRBD2	1.24758	69.6591	0.786441	162.796	0.321009	361.513	0	0	9.34977	1.0828	0.739937	no
TRBV1_TRBJ2-5_TRBD2	18836	19396.6	41820.2	19436.1	18296.2	39832.2	210.423	37993.7	346906	24.363	0.405509	no
TRBV15_TRBJ1-2_TRBD1	3929.57	33.7649	0.39322	78.6665	184.259	2492.09	0	0	19.3229	0	0.719994	no
TRBV16_TRBJ2-3_TRBD2	4658.47	912.565	1.57288	6427.71	59.3866	51.6447	0.412594	5.33526	17.1412	1.0828	0.143224	no
TRBV14_TRBJ1-1_TRBD2	5.61411	1.82513	1.17966	14.75	1.92605	23.4749	0	5.33526	11.2197	64.4267	0.246282	no
TRBV4_TRBJ1-2_TRBD2	0	0	0	0	0.321009	0	0	0	0.623318	0	0.681442	no
TRBV3_TRBJ1-5_TRBD1	10.6044	599.859	1.9661	0	5.77816	7.04246	0.412594	2.22303	1.5583	1.6242	0.366756	no
TRBV14_TRBJ2-5_TRBD2	481.566	12.7759	3.53898	2232.71	10.9143	2999.62	0	3.55684	21.1928	5.95541	0.939676	no
TRBV15_TRBJ2-7_TRBD1	16931.5	3559.61	0.786441	162.25	94.0556	2.81698	0.412594	0.444605	70.7466	0	0.274177	no
TRBV26_TRBJ1-6_TRBD1	31.8133	59.9251	0	20.2129	99.1917	1.87799	5.36373	0	22.4394	0	0.102652	no
TRBV15_TRBJ2-1_TRBD2	193.063	3548.05	7.47118	113933	14986.3	1.40849	1.65038	0.88921	60.4618	2.707	0.294841	no
TRBV29_TRBJ1-2_TRBD1	3089.94	57.7958	11.4034	85.7683	15.0874	45.0718	5291.52	13608.5	5847.35	1.0828	0.161165	no
TRBV13-1_TRBJ1-4_TRBD2	14.3472	16.122	17.3017	9.28701	1.92605	29.1088	0	3.55684	1.24664	4.87261	0.532144	no
TRBV12-1_TRBJ2-3_TRBD1	162.809	61.7502	0	2231.07	22.4706	0	0	31.567	13.4013	2.707	0.326174	no
TRBV1_TRBJ2-4_TRBD2	5144.71	219742	54048.5	28107.4	19980.9	21454.6	146.884	47.1281	8243.38	663.216	0.207241	no
TRBV31_TRBJ2-5_TRBD2	1164.62	970.057	281.546	378.036	21.1866	22.0664	13.6156	153.389	14049	0	0.461159	no
TRBV12-1_TRBJ2-5_TRBD2	141.6	211.107	1.57288	8122.31	40.7681	0	0	15.1166	130.585	0	0.355816	no
TRBV12-1_TRBJ2-3_TRBD2	5124.12	3719.31	0.786441	6681.73	9.30926	0.938995	1.23778	57499.4	32.4125	25.4458	0.506991	no
TRBV20_TRBJ1-2_TRBD2	0	0.912565	0	1.09259	0.642018	0.469497	0	0.444605	0	0	0.222368	no
TRBV16_TRBJ2-4_TRBD1	36.8036	529.288	0.39322	7042.29	10.2723	9.85945	0	0.88921	88.5112	0	0.338054	no
TRBV19_TRBJ2-7_TRBD2	37.1155	20.3806	0	10.9259	0	0	0	2.66763	2.18161	0	0.142932	no
TRBV29_TRBJ1-6_TRBD1	3764.89	18.8597	6.68474	2653.9	70.6219	15.4934	63.9521	93.8117	4.36323	0	0.187404	no
TRBV4_TRBJ2-4_TRBD2	39.6107	8.82146	27.5254	0	15.0874	66.6686	47.8609	0	0.934977	0	0.76916	no
TRBV3_TRBJ1-6_TRBD1	203.979	78.7848	1.17966	4.37036	19.2605	9.38995	0.412594	16.895	4.36323	1.6242	0.224494	no
TRBV16_TRBJ1-4_TRBD2	15.5948	76.3513	1.57288	9.83331	0	116.905	0	4.89066	57.6569	0.541401	0.588702	no
TRBV13-2_TRBJ1-4_TRBD1	5790.64	8524.57	479.729	7616.99	6570.73	10398.9	2.06297	179.62	50.1771	102.866	0.186962	no
TRBV4_TRBJ2-3_TRBD1	10.2925	0	13.7627	0	0.963027	0.469497	0	0.444605	47.9955	1.6242	0.629859	no
TRBV30_TRBJ2-3_TRBD2	4.05464	6.08377	46.4	1.63888	2.88908	37.5598	14.4408	161.392	1.86995	0	0.376176	no
TRBV14_TRBJ1-6_TRBD1	368.972	5.47539	3.53898	1.09259	8882.96	1285.01	0.412594	5.77987	0.311659	27.07	0.420046	no
TRBV29_TRBJ1-2_TRBD2	2.80706	307.534	1.57288	10.3796	0	18.3104	44.1476	39.1252	6.23318	0	0.521965	no
TRBV16_TRBJ1-3_TRBD2	14.971	15.5136	1.17966	13.6574	2.88908	3.75598	0	0	7.16816	0	0.0768567	no
TRBV16_TRBJ2-1_TRBD1	2273.4	1045.5	1.9661	9932.73	10.9143	24.8834	0.412594	6.22447	33.0359	26522.1	0.655521	no
TRBV12-1_TRBJ1-5_TRBD1	97.9351	2202.93	0	8.19442	3.5311	0	0	0.444605	1.86995	5.95541	0.349605	no
TRBV14_TRBJ2-2_TRBD2	4.99032	3.65026	25.5593	2.73147	4.17311	8.92045	0	4.00145	2.49327	26.5286	0.979881	no
TRBV1_TRBJ1-1_TRBD1	25109.7	29203	46279.7	47537.5	38922.3	36285.1	220015	38742.4	14474.1	291.274	0.575423	no
TRBV20_TRBJ1-2_TRBD1	1.87137	250.651	1.57288	175.361	0	278.412	0	0	1.86995	0	0.708444	no
TRBV16_TRBJ1-2_TRBD1	894.203	622.065	0.786441	1813.15	11.5563	12.6764	0	0.444605	39.5807	27.6114	0.123129	no
TRBV26_TRBJ2-7_TRBD1	204.291	213.236	0	60.0924	12565.9	1.87799	0.412594	2.22303	11184.5	1.0828	0.914567	no
TRBV6_TRBJ1-6_TRBD1	0	0	0	0	0	0	0	0.444605	0	0	0.373901	no
TRBV1_TRBJ2-1_TRBD1	7076.28	29519.3	357.437	115.268	211.224	22860.8	75105	27135.6	90.6928	81.2101	0.285832	no
TRBV29_TRBJ2-4_TRBD2	2247.2	3749.43	13.7627	2721.64	2.88908	11.2679	213.724	4.89066	112.509	0	0.0888025	no
TRBV30_TRBJ1-5_TRBD2	0.311895	0	7.07796	0	0	0	9.48967	2.66763	0	0	0.691581	no
TRBV17_TRBJ2-7_TRBD2	208.346	427.08	0	306.471	18.6185	0	0	0	0	2.1656	0.0804166	no
TRBV19_TRBJ1-1_TRBD1	21.2089	935.075	0	136.574	23.7547	2.34749	77.9803	108.039	0	0	0.361322	no
TRBV4_TRBJ2-2_TRBD1	0.311895	10.3424	0.786441	0	68.6959	0.469497	0	0.444605	0	0	0.299665	no
TRBV15_TRBJ2-3_TRBD2	293.805	103.728	0	8383.99	18.6185	0.469497	0	0	71.6816	0.541401	0.351539	no
TRBV17_TRBJ1-5_TRBD1	3.11895	1.21675	226.495	0.546295	0.321009	0.469497	0	0	0	7.57961	0.377004	no
TRBV21_TRBJ1-3_TRBD1	0.311895	2.12932	0	0	0	0	0	0.444605	9.03811	0	0.481669	no
TRBV17_TRBJ2-4_TRBD1	255.442	1.52094	0.39322	3.27777	0.963027	0.469497	0	0	0.623318	0	0.362904	no
TRBV12-2_TRBJ2-5_TRBD1	0.62379	0.912565	0	63.9165	0.963027	0	0	0	0	0	0.353267	no
TRBV19_TRBJ2-5_TRBD1	9.66875	43.4989	0	0.546295	38.2001	0.469497	0.825189	145.386	0.311659	0	0.73302	no
TRBV12-1_TRBJ1-1_TRBD1	69.5526	204.11	0.786441	289.536	25.3597	0	0	74.2491	347.5	108.28	0.892079	no
TRBV2_TRBJ2-1_TRBD1	0.935685	3.04188	27.1322	0	0.321009	0.469497	0.412594	51.5742	0	0	0.727939	no
TRBV24_TRBJ2-7_TRBD2	0.62379	1.21675	0	0	41.7311	0	0	0	167.361	0	0.508324	no
TRBV13-3_TRBJ2-7_TRBD2	13945.5	12045.9	17.3017	17808.7	395.162	26.2919	0.825189	5.77987	254.314	2.1656	0.073623	no
TRBV12-2_TRBJ1-6_TRBD2	0	0	0	0	0.321009	0	0	0	0	0	0.373901	no
TRBV31_TRBJ1-3_TRBD1	1495.54	1838.21	7219.13	65.5554	20.8656	7.98146	268.599	3.55684	9.66143	0	0.193257	no
TRBV2_TRBJ2-1_TRBD2	0.311895	21.2932	18.0881	0	36.595	0.938995	0	0	0	0	0.0947492	no
TRBV6_TRBJ1-2_TRBD1	0	0	0	0.546295	0	0	0	0	0.311659	0	0.721231	no
TRBV2_TRBJ2-4_TRBD2	0	11.8633	18.0881	0	0	0	0	0	0	0	0.189881	no
TRBV31_TRBJ2-3_TRBD1	67.0575	1409.3	101.844	8993.65	37.558	185.451	15.266	51.5742	21.8161	0	0.299988	no
TRBV17_TRBJ2-3_TRBD1	195.558	122.588	1.17966	3.82406	4.17311	2.34749	0	0	0	0	0.178853	no
TRBV15_TRBJ2-5_TRBD2	184.954	120.763	15.3356	6122.87	140.923	0.938995	0	0	75.7331	0	0.339715	no
TRBV30_TRBJ2-7_TRBD2	7.17359	7.60471	190.712	4.91665	5.77816	24.8834	0.412594	6.22447	1.86995	0	0.379372	no
TRBV12-2_TRBJ2-3_TRBD1	43.0415	0	0.39322	9.28701	0.642018	0	0	0	0	0	0.266703	no
TRBV19_TRBJ2-5_TRBD2	32.749	10.3424	0	21.3055	0	0	2.47557	5.77987	2.80493	0	0.168604	no
TRBV13-3_TRBJ2-3_TRBD2	4109.84	144.185	18.0881	122.916	182.012	37.5598	0	21.7856	24.6211	0	0.323695	no
TRBV14_TRBJ2-5_TRBD1	1313.7	1148.92	6.29152	13.6574	4213.56	1820.71	0.412594	16.0058	4.05157	7.03821	0.299905	no
TRBV2_TRBJ2-3_TRBD2	0	21.5974	0.39322	0	0	138.032	0	0	0	0	0.450839	no
TRBV2_TRBJ2-5_TRBD2	0	26.1602	10.2237	9.83331	24.7177	48.3582	0	0	0	0	0.69226	no
TRBV4_TRBJ1-6_TRBD1	9.35685	4.56283	27.5254	0	37.879	91.0825	0	0.88921	113.444	0	0.383761	no
TRBV12-2_TRBJ2-7_TRBD2	25.2635	86.0853	0	214.148	4.49412	0	0	0	0	1.6242	0.176764	no
TRBV2_TRBJ2-7_TRBD2	0.311895	0.608377	0.786441	0	0	27.7003	0	0	0.311659	0	0.394983	no
TRBV29_TRBJ2-1_TRBD2	1285.32	1640.18	35.3898	302.647	13.1614	2629.19	37726.4	65.8016	7.16816	1.6242	0.373929	no
TRBV16_TRBJ2-3_TRBD1	2471.15	5495.16	3.53898	57.9073	21.1866	4.22548	0	1.77842	31.4776	35.7325	0.213914	no
TRBV21_TRBJ1-1_TRBD1	1.55948	7.60471	0	0	0	0	0	277.878	14.0247	0.541401	0.360565	no
TRBV24_TRBJ2-5_TRBD2	0	17.6429	0	0	0	0	0	0	0.623318	0	0.389479	no
TRBV3_TRBJ1-2_TRBD2	1.55948	11.5592	1.9661	2.73147	2.24706	0.469497	1.23778	1.33382	9.03811	0	0.545711	no
TRBV26_TRBJ1-5_TRBD2	13.0996	6.99633	0	9.83331	2.24706	0	0.412594	0	0.623318	0	0.0602728	no
TRBV12-2_TRBJ2-2_TRBD2	0.311895	0.608377	0	1.63888	0	2.81698	0	0	0	0	0.938343	no
TRBV17_TRBJ2-2_TRBD1	76.1024	1.21675	0	0	569.149	1.40849	0	0	2.18161	16.242	0.321826	no
TRBV3_TRBJ2-3_TRBD1	32.4371	38.6319	4.71864	12.5648	25.0387	3.28648	2.88816	1.77842	1515.91	0	0.404298	no
TRBV4_TRBJ2-5_TRBD2	24.3278	4.25864	2.75254	15.2963	0.321009	40.3768	1.23778	0	0	0	0.911244	no
TRBV3_TRBJ1-3_TRBD2	3.11895	4.56283	3.53898	6.00924	2.56807	0.469497	0.825189	0	13.713	0	0.743582	no
TRBV31_TRBJ2-4_TRBD1	1558.23	30.4188	36.5695	4309.17	15.4084	7643.42	13.203	47.1281	5.2982	0	0.846109	no
TRBV15_TRBJ1-1_TRBD1	17228.5	128.367	3.9322	3155.95	99934.2	3.75598	2.06297	1.33382	6.8565	7.57961	0.278505	no
TRBV24_TRBJ1-2_TRBD1	0	29.2021	0	0	0.963027	0	0	0	0.311659	0	0.361113	no
TRBV24_TRBJ2-5_TRBD1	0.311895	3.95445	0	0	0	0	0	0	4.05157	0	0.970429	no
TRBV3_TRBJ2-7_TRBD2	1430.04	3010.86	5.11186	9448.72	1796.04	9.85945	0.825189	38.236	102.536	5.95541	0.132645	no
TRBV26_TRBJ2-4_TRBD1	62.379	50.4953	0.39322	137.12	14816.2	7.04246	15.6786	2.22303	10656.2	1.0828	0.816244	no
TRBV21_TRBJ1-3_TRBD2	0	0.304188	0	0	0	0	0	0.444605	0.311659	0	0.449843	no
TRBV30_TRBJ1-2_TRBD1	17.4661	2650.09	23.2	2.73147	8.66724	7.04246	7.4267	16.0058	3.73991	0	0.368918	no
TRBV21_TRBJ1-2_TRBD2	0	4.86701	0	0	0	0	0	4.89066	0	0	0.99735	no
TRBV1_TRBJ2-3_TRBD2	15552.3	49635.9	225.708	169.898	320.688	71180	664.277	345.458	792.237	2058.95	0.917414	no
TRBV12-1_TRBJ1-2_TRBD2	21.8327	61.446	0	72.1109	0.321009	0	0	10.6705	1.5583	0.541401	0.132714	no
TRBV29_TRBJ2-7_TRBD1	2006.73	36.8068	31.0644	7279.38	23.1126	9.85945	0	392.586	12.778	0.541401	0.271117	no
TRBV15_TRBJ2-2_TRBD2	2866.63	2761.73	0	31.1388	84.4253	0.469497	0	0	5.60986	0.541401	0.166905	no
TRBV13-3_TRBJ2-3_TRBD1	4108.59	2295.1	20.4475	6253.98	13258	4.69497	12.7904	33.3454	46.7489	1.6242	0.084545	no
TRBV13-2_TRBJ2-5_TRBD2	16121.9	7402.73	5275.05	8605.24	157.615	523.49	77895.3	47.1281	5505.46	24.9044	0.580329	no
TRBV13-3_TRBJ1-2_TRBD2	41.1702	2047.49	4.32542	44.7962	0.321009	0.469497	2.47557	2.22303	165.491	0	0.387095	no
TRBV3_TRBJ1-2_TRBD1	18.0899	727.923	3.9322	12.0185	13.8034	9.38995	43.3224	4.00145	60.7735	9.20382	0.416692	no
TRBV5_TRBJ2-3_TRBD1	36606.5	5594.94	16218	72.1109	486.007	3295.87	13453.9	166.282	267.403	285.86	0.306931	no
TRBV14_TRBJ1-3_TRBD1	456.303	674.994	1189.49	24.5833	15.7294	15.4934	0	57.3541	13.713	27.07	0.110075	no
TRBV13-1_TRBJ2-5_TRBD2	1267.23	2018.9	2949.15	443.045	23.7547	10097.5	0	3.55684	121.859	16.242	0.74901	no
TRBV16_TRBJ1-4_TRBD1	1423.8	10162.3	0.786441	26.7685	38.8421	14741.8	0	10.2259	19.0112	8.66241	0.865076	no
TRBV30_TRBJ1-2_TRBD2	15.5948	40.7612	18.4814	0	0.321009	1.40849	6.60151	17.3396	0.311659	0	0.274648	no
TRBV2_TRBJ2-2_TRBD2	13.4115	10.0382	0	0	0	0	0	0	22.1278	0	0.961642	no
TRBV20_TRBJ2-2_TRBD2	0.311895	0.304188	1.17966	0.546295	0.321009	0.938995	0	0	0.623318	0	0.421489	no
TRBV13-2_TRBJ2-3_TRBD2	1981.78	4494.69	9642.55	5630.12	8759.69	10960.9	15.6786	96.9239	52.6704	97.9936	0.18136	no
TRBV23_TRBJ1-1_TRBD2	0	0	0.39322	0	0	0	0	0	0	0	0.373901	no
TRBV23_TRBJ2-5_TRBD1	0.935685	0.912565	0	1.63888	0	0	0	0	0	0	0.0899502	no
TRBV12-2_TRBJ1-4_TRBD2	0	0	0	3.27777	0	0.469497	0	0	0	0	0.442383	no
TRBV3_TRBJ2-7_TRBD1	489.987	420.692	10.2237	694.341	35.953	6.57296	0	22.6749	35.5291	9.74522	0.0770967	no
TRBV1_TRBJ2-7_TRBD2	41620.2	4125.71	907.159	526.628	29157.6	14269	335.439	53.3526	614.592	40.6051	0.23114	no
TRBV19_TRBJ2-1_TRBD2	19.3375	58.1	0	27.3147	0.642018	0	40.8468	1.33382	0.623318	0	0.378695	no
TRBV14_TRBJ2-7_TRBD2	25.8873	1518.81	5.8983	1277.24	31.4589	1333.84	0.412594	0	2.49327	12606.5	0.42212	no
TRBV12-1_TRBJ2-7_TRBD1	2346.08	1334.47	0.786441	720.017	17056.8	0.469497	0	43.5713	83.5246	2552.71	0.309866	no
TRBV1_TRBJ2-2_TRBD1	4574.25	7431.63	113210	41.5184	22033.1	234.279	230.64	146.72	93.8094	123635	0.891526	no
TRBV26_TRBJ2-1_TRBD1	4748.6	5549.31	0.39322	56.2684	297.254	6.57296	38.7839	2.22303	24852.6	1.0828	0.604373	no
TRBV2_TRBJ1-4_TRBD2	0	0	0	0	0	17.3714	0	0	0	0	0.373901	no
TRBV3_TRBJ1-3_TRBD1	16.5304	397.574	614.996	635.341	6.42018	4.22548	2.47557	0.444605	75.7331	4.87261	0.0834664	no
TRBV13-1_TRBJ1-3_TRBD2	4.99032	11.8633	26.3458	26.2222	45.9043	17.3714	0	0	2.80493	3.78981	0.0595701	no
TRBV23_TRBJ2-4_TRBD1	0.311895	0.608377	0	0	0	0	0	0	0	0	0.206097	no
TRBV29_TRBJ2-2_TRBD1	1861.7	1844.6	18.4814	76.4813	3.85211	5.63397	113.463	12.0043	11.5314	0	0.175947	no
TRBV17_TRBJ1-4_TRBD2	0.311895	5.1712	0	0	0	0	0	0	1.5583	0	0.496682	no
TRBV30_TRBJ2-3_TRBD1	6.2379	9.12565	22.0203	4.91665	8.34623	2.34749	12.7904	235.196	4.98654	0	0.425108	no
TRBV31_TRBJ1-3_TRBD2	34.9323	17.9471	4293.97	9.28701	0.963027	14.5544	13.203	0	3.11659	1.0828	0.369225	no
TRBV31_TRBJ1-6_TRBD1	29.9419	1785.59	6007.23	3289.79	12.8404	18.3104	14.0282	31.1224	0.311659	0	0.12082	no
TRBV31_TRBJ2-3_TRBD2	1170.23	3312.31	5384.76	192.842	8.02522	58134.1	3.30075	14.672	7.79148	0.541401	0.455494	no
TRBV29_TRBJ2-5_TRBD2	2548.18	1588.17	42.4678	1712.09	8.98825	14.5544	245.494	13.7828	34.5941	0	0.0884768	no
TRBV29_TRBJ1-3_TRBD1	2055.7	47.7576	2610.59	5265.74	13.1614	11.2679	66.8403	11.1151	24.6211	0.541401	0.111219	no
TRBV16_TRBJ1-6_TRBD1	10.6044	15.8178	0.786441	6.00924	30.1748	9.38995	0	1.77842	19.0112	10.828	0.48546	no
TRBV30_TRBJ1-5_TRBD1	2.18327	1.82513	12.9763	0.546295	3.85211	6.57296	10.3149	8.4475	1.24664	0	0.738878	no
TRBV12-1_TRBJ2-5_TRBD1	270.413	7083.33	1.17966	380.221	42.3732	0	0.412594	9.78131	8.72645	24.363	0.326228	no
TRBV14_TRBJ2-1_TRBD1	1349.57	563.053	1081.36	4.91665	24.3967	4261.63	0	12.0043	1617.51	43.3121	0.534876	no
TRBV13-1_TRBJ2-1_TRBD2	1183.95	2399.44	458.102	348.536	7669.22	9681.98	0	4.44605	431.648	24205.5	0.408529	no
TRBV2_TRBJ1-6_TRBD2	0	0	0	0	0	0.469497	0	0	0	0	0.373901	no
TRBV24_TRBJ2-2_TRBD2	0	0.304188	1.17966	0	0	0	0	0	0	0	0.263741	no
TRBV5_TRBJ2-4_TRBD2	1477.76	1094.47	177.736	69.3795	3762.54	7987.56	233.528	21823.4	423.545	62.8025	0.320863	no
TRBV5_TRBJ1-6_TRBD2	17.778	38.3277	59.7695	10.3796	25.0387	4468.68	84.9944	49.7958	65.4484	463.439	0.313118	no
TRBV1_TRBJ1-4_TRBD1	12507.9	3468.96	46913.5	179.731	274.463	99161.1	44.9728	43438.8	1891.46	194.363	0.476365	no
TRBV13-2_TRBJ2-4_TRBD2	10293.2	4430.5	249.302	4339.77	83.1413	14143.1	84.1692	108.484	210.681	182.994	0.789351	no
TRBV12-2_TRBJ1-4_TRBD1	32.749	0	0	1.63888	0.321009	0	0	0	0	0	0.34299	no
TRBV13-1_TRBJ2-5_TRBD1	4165.98	7715.74	2737.99	388.416	108.822	346.02	0	16.4504	48.3071	31.9427	0.102928	no
TRBV30_TRBJ1-6_TRBD2	0.62379	0	17.6949	0	0	2.81698	6.60151	8.8921	0.311659	0	0.988163	no
TRBV13-3_TRBJ2-5_TRBD1	1522.67	2453.28	7.86441	19332.8	364.666	27.7003	45.3854	164.504	60.1502	0	0.272079	no
TRBV12-1_TRBJ1-6_TRBD2	14.0353	11.8633	0	329.962	34.669	0	0	4.44605	2.80493	1.0828	0.293159	no
TRBV2_TRBJ1-3_TRBD1	0.311895	0	0	0	0.642018	0	0	0	0	0	0.210235	no
TRBV13-2_TRBJ2-1_TRBD1	8094.93	1773.42	413.668	2728.74	38523.6	456.821	113.463	21184.5	26637.5	270.159	0.952112	no
TRBV20_TRBJ2-1_TRBD1	85.4593	0.912565	0.786441	0	0	311.277	0	0	0.311659	0.541401	0.519115	no
TRBV13-3_TRBJ1-1_TRBD2	96.6875	68.7466	14.1559	155.694	17.9765	14.5544	0	6.22447	27.1143	0	0.0805208	no
TRBV12-1_TRBJ2-1_TRBD2	14843.4	3399.3	4.71864	204.861	4.17311	0.469497	0.412594	38.6806	49.5538	95.828	0.270718	no
TRBV15_TRBJ1-1_TRBD2	83.5879	31.9398	0	204.861	73.832	0	0	0	4.98654	0	0.0894624	no
TRBV12-1_TRBJ2-1_TRBD1	6683.91	8588.45	0	140.944	34.669	0.469497	0	48.462	25.8677	46.0191	0.17842	no
TRBV13-3_TRBJ2-4_TRBD2	5867.99	4136.66	9.83051	5561.83	36.595	32.3953	1.23778	201.406	197.592	0	0.0795228	no
TRBV7-2_TRBJ1-1_TRBD1	0	0	0	0	0.321009	0	0	0	0	0	0.373901	no
TRBV13-3_TRBJ2-2_TRBD1	6452.17	6065.82	23.2	118	57.4606	9.85945	3.30075	120.933	31.7892	0.541401	0.173623	no
TRBV12-2_TRBJ2-3_TRBD2	3.43085	22.8141	0	60.6387	0.642018	0	0	0	0	0	0.204854	no
TRBV29_TRBJ2-5_TRBD1	6173.34	93.69	35.783	22075.8	13.1614	1746.06	95.7219	60.0217	24.9327	1.6242	0.283198	no
TRBV12-2_TRBJ2-2_TRBD1	43.0415	1.21675	0	201.037	0	0	0	0	0	0	0.275602	no
TRBV12-1_TRBJ1-3_TRBD1	2446.19	11092.2	1.17966	322.86	16.3715	0	0.412594	0	25.556	89.8726	0.265555	no
TRBV16_TRBJ2-1_TRBD2	3345.39	884.58	5.50508	96.6942	15.7294	38.9683	0	13.7828	32.1009	33.0255	0.257011	no
TRBV17_TRBJ1-2_TRBD2	1.24758	0.304188	0	0	0	0	0	0	0	0	0.268283	no
TRBV24_TRBJ1-4_TRBD1	1.24758	35.59	0	0	0	28.6393	0	0	2.80493	0	0.907904	no
TRBV13-1_TRBJ1-5_TRBD1	992.762	943.592	450.237	22.9444	12.1983	2010.39	1.23778	12.0043	12.4664	24.363	0.878358	no
TRBV14_TRBJ2-7_TRBD1	967.499	766.25	1225.67	1129.19	6431.09	1359.2	0	24.0087	10.9081	42.2293	0.171499	no
TRBV20_TRBJ2-7_TRBD1	308.464	153.007	6.68474	0.546295	1.60504	971.86	0	0.444605	0.311659	0.541401	0.64327	no
TRBV21_TRBJ2-4_TRBD2	0.62379	10.9508	0	0	0	0	0	15.5612	10.9081	0	0.477475	no
TRBV24_TRBJ2-4_TRBD1	0	0.304188	0	0	0	0	0	0	155.206	0	0.374744	no
TRBV15_TRBJ1-6_TRBD2	18.4018	6.38796	0	3.27777	2.24706	0.469497	0	0	0.623318	0	0.146684	no
TRBV14_TRBJ2-1_TRBD2	19.9613	179.471	1541.03	1145.58	11.5563	26.7614	0	8.8921	5.92152	54.6815	0.15431	no
TRBV2_TRBJ1-4_TRBD1	10.9163	0.304188	0.39322	0	0	0.469497	0	0	0.311659	0	0.370817	no
TRBV30_TRBJ2-4_TRBD1	4.36653	2.7377	6.29152	2.73147	5.13614	7.51196	32.1824	7.55829	4.36323	0	0.343679	no
TRBV17_TRBJ1-1_TRBD1	4.67843	171.562	204.081	3.82406	382.001	558.232	0	0	0.311659	0.541401	0.763278	no
TRBV26_TRBJ1-2_TRBD2	13.0996	21.5974	0	5.46295	2.56807	0.469497	0	0	2.49327	0	0.113113	no
TRBV12-1_TRBJ2-4_TRBD1	173.102	48.0618	0	88.4998	7.3832	0	0	38.6806	228.446	0	0.859752	no
TRBV19_TRBJ1-2_TRBD1	33.3728	4.25864	0	0	0	0	90.3582	43.5713	45.1906	0.541401	0.173913	no
TRBV23_TRBJ2-2_TRBD2	0.62379	0.304188	0	4.37036	0	0	0	0	0	0	0.273569	no
TRBV20_TRBJ2-5_TRBD1	2.18327	0.608377	1.17966	1.63888	0	2.34749	0	0	0	0	0.313703	no
TRBV17_TRBJ2-4_TRBD2	214.272	3.34607	0	84.1294	657.747	0	0	0	0.623318	2.1656	0.194144	no
TRBV13-2_TRBJ2-1_TRBD2	13203.5	6757.24	12211.8	21323.5	350.863	5389.83	247.144	316.114	200.708	25085.8	0.470943	no
TRBV15_TRBJ1-6_TRBD1	1686.11	14.601	1.17966	6.00924	43.6572	0	0	0	2.49327	0	0.354093	no
TRBV4_TRBJ2-3_TRBD2	9.98064	0	0	15.8426	72.869	11.2679	0	0	0	234.427	0.571269	no
TRBV23_TRBJ2-2_TRBD1	0.311895	0	0.39322	0	0	0	0	0	0	0	0.181573	no
TRBV12-2_TRBJ1-2_TRBD1	30.2538	20.6848	0	2.18518	2.56807	0	0	0	0.311659	0	0.141547	no
TRBV12-1_TRBJ1-3_TRBD2	35.2441	26.7686	0	51.898	0	0	0	4.89066	0.623318	0	0.0992004	no
TRBV21_TRBJ2-1_TRBD2	0.62379	14.601	0	0	0	0	0	220.524	4.05157	0	0.394799	no
TRBV26_TRBJ1-2_TRBD1	4007.54	4436.89	0	130.564	21203	1.87799	31.3572	0.444605	390.509	3.24841	0.209032	no
TRBV23_TRBJ2-1_TRBD1	1.55948	1.52094	0.39322	1.09259	0	0	0	0	115.625	0	0.391212	no
TRBV12-1_TRBJ2-2_TRBD1	188.697	8711.65	0.786441	203.768	10.9143	0.469497	0	13.3382	3.73991	23.2802	0.351499	no
TRBV13-3_TRBJ1-6_TRBD2	9.98064	15.8178	1.57288	7.10183	7.06219	2.34749	0	2.22303	9.03811	0	0.0896199	no
TRBV5_TRBJ2-5_TRBD2	4459.16	8621.61	7540.78	9650.3	363.061	623.962	969.597	216.967	53210.8	54.1401	0.669941	no
TRBV20_TRBJ2-7_TRBD2	163.121	61.1419	1.57288	2.73147	2218.81	5.63397	0	0.444605	0	2244.11	0.95113	no
TRBV31_TRBJ2-2_TRBD1	17.4661	3703.49	131.336	7.64813	7.70421	12.6764	267.774	17.7842	0.934977	0	0.385846	no
TRBV16_TRBJ1-2_TRBD2	4.05464	4.25864	0	9.83331	0	2.81698	0	0	5.92152	0	0.412659	no
TRBV15_TRBJ2-4_TRBD1	6361.41	1938.9	0.786441	227.805	36.595	0	0.825189	0	10.5964	0	0.232412	no
TRBV26_TRBJ2-1_TRBD2	78.5976	186.467	0	96.6942	120.057	5.63397	37.5461	0	287.35	0	0.649738	no
TRBV15_TRBJ1-4_TRBD2	46.4724	31.3314	1.9661	21.8518	1.60504	0	0	0	0.311659	0	0.0758732	no
TRBV1_TRBJ1-3_TRBD2	73.9191	143.577	80.2169	127.287	45.9043	199.536	25.5809	7.55829	143.051	3.24841	0.691858	no
TRBV26_TRBJ2-3_TRBD1	6581.3	74.222	0.39322	5230.23	272.537	1.40849	23.5179	0.444605	156.141	0	0.170383	no
TRBV15_TRBJ1-5_TRBD2	11.2282	9.73403	0	3.27777	1.60504	0	0	0	0	0	0.0824559	no
TRBV17_TRBJ1-6_TRBD2	0	0	0	0	0.321009	0	0	0	0	0	0.373901	no
TRBV13-1_TRBJ1-3_TRBD1	133.179	156.049	3800.08	3488.09	7741.45	3146.57	0.412594	1.77842	263.352	621.528	0.195778	no
TRBV23_TRBJ1-3_TRBD1	0.311895	0	0	0.546295	0	0	0	0	0.623318	0	0.78599	no
TRBV23_TRBJ2-5_TRBD2	189.32	0.912565	0	1.09259	0	0	0	0	0	0	0.368247	no
TRBV6_TRBJ2-1_TRBD2	0	0	0	0	0	0	1.65038	0	0	0	0.373901	no
TRBV14_TRBJ1-6_TRBD2	0.62379	0	0.39322	2.18518	42.0522	1445.58	0	0	0	2.1656	0.386821	no
TRBV6_TRBJ2-2_TRBD1	0	0.304188	0	0	0	0	0	0	0	0	0.373901	no
TRBV31_TRBJ2-4_TRBD2	4840.61	1863.15	248.122	5508.84	8.34623	631.005	6.60151	17.7842	29.9193	0	0.108523	no
TRBV30_TRBJ2-2_TRBD1	3.74274	0.304188	38.1424	0.546295	3.5311	7.51196	2.88816	8.00289	1.5583	0	0.514873	no
TRBV31_TRBJ1-4_TRBD1	3734.32	1538.89	75.8915	31.1388	8.34623	13363.8	7.0141	81.8073	9.03811	0.541401	0.586708	no
TRBV19_TRBJ1-4_TRBD2	0.311895	0.304188	0	0	0	0	1.23778	0.444605	0.934977	0	0.186995	no
TRBV13-2_TRBJ2-3_TRBD1	7005.48	1424.21	4039.16	302.101	715.208	214.091	66.8403	107.594	91.9394	57.9299	0.108619	no
TRBV12-1_TRBJ2-2_TRBD2	143.472	100.078	0	116.361	15.7294	0	0	386.362	12.778	12.4522	0.932815	no
TRBV21_TRBJ1-6_TRBD1	0.311895	1.21675	0	0	0	0	0	49.3512	0	0	0.38747	no
TRBV4_TRBJ1-2_TRBD1	6.86169	0.912565	7.07796	33.324	120.378	39.4378	0	0	68.8766	0	0.662833	no
TRBV1_TRBJ1-6_TRBD2	1572.58	116.2	100.664	48.6203	40.7681	107.045	252.095	30.6778	285.791	12.9936	0.475706	no
TRBV4_TRBJ1-3_TRBD2	0	0.304188	0	0	0.321009	0	0	0	0	0	0.178014	no
TRBV23_TRBJ1-6_TRBD2	0.311895	0	0	0.546295	0	0	0	0	0	0	0.198389	no
TRBV13-1_TRBJ1-2_TRBD1	4148.52	870.891	3184.69	10927.5	1506.82	3711.38	2.47557	32.4562	59691.1	22318.2	0.319839	no
TRBV14_TRBJ2-4_TRBD2	2243.77	18.8597	3.14576	637.526	8.98825	31.9258	0.412594	2.66763	11.5314	12.9936	0.257776	no
TRBV3_TRBJ1-4_TRBD1	908.55	869.979	5.50508	961.479	36.916	6.10347	0	29.3439	14.0247	8.12101	0.0676322	no
TRBV5_TRBJ2-2_TRBD1	3414.63	3211.01	9475.82	41.5184	200.952	9902.64	54514.9	171.618	92.5627	135.35	0.413614	no
TRBV24_TRBJ1-6_TRBD1	0	0.304188	0	0	0	0	0.412594	0	0	0	0.838252	no
TRBV13-3_TRBJ2-7_TRBD1	22111.8	392.099	31.0644	4755.5	12343.1	9.38995	1.23778	159.169	101.601	1.6242	0.13296	no
TRBV15_TRBJ2-7_TRBD2	3693.46	2281.72	0.39322	531.545	7097.18	12.2069	0.412594	0	172.971	0.541401	0.102977	no
TRBV29_TRBJ1-4_TRBD1	3363.79	2695.72	11.0102	4084.1	9.30926	21.5969	57.7632	60.9109	10.2847	0.541401	0.0790476	no
TRBV4_TRBJ1-6_TRBD2	0	0	0	0	0.321009	0	0	0	0	0	0.373901	no
TRBV24_TRBJ2-1_TRBD1	0.311895	53.233	0.39322	0	0	0	1.23778	0	4.05157	0	0.411721	no
TRBV5_TRBJ1-1_TRBD2	42.7296	205.327	289.803	37.6944	126.477	265.266	208.36	72.026	248.392	413.63	0.204479	no
TRBV6_TRBJ2-1_TRBD1	0	0	0	0.546295	0	0	0	0	0	0	0.373901	no
TRBV23_TRBJ1-2_TRBD1	1.24758	0.912565	0	2.18518	0	0	0	0	0.623318	0	0.147371	no
TRBV19_TRBJ1-4_TRBD1	72.3597	0.608377	0	24.037	0.321009	0.938995	220.325	152.5	0	0	0.312285	no
TRBV20_TRBJ1-4_TRBD1	99.4945	0.608377	0.39322	0	0.321009	1.40849	0	4.00145	0	0.541401	0.393082	no
TRBV13-1_TRBJ1-6_TRBD2	9.04496	12.4717	3.53898	140.398	2.56807	76.0586	0	2.22303	0.934977	9.74522	0.622306	no
TRBV16_TRBJ1-6_TRBD2	2.80706	3.04188	0.786441	2.73147	1.28404	2.34749	0	0.88921	4.98654	0	0.658972	no
TRBV2_TRBJ2-2_TRBD1	9.04496	0.608377	0.786441	0	0.321009	0	0	0	0	0	0.28102	no
TRBV12-1_TRBJ1-6_TRBD1	1892.89	24.9434	0	14.2037	15663	0	0.825189	45.7943	4.36323	114.236	0.317903	no
TRBV21_TRBJ1-6_TRBD2	0	0.608377	0	0	0	0	0	8.8921	0	0	0.404831	no
TRBV6_TRBJ2-5_TRBD1	0	0.304188	0	0	0	0	0	0	0	0	0.373901	no
TRBV19_TRBJ1-5_TRBD2	0	0.608377	0	0	0	0	0	0	0	0	0.373901	no
TRBV24_TRBJ1-1_TRBD2	0	0.304188	0	0	0	0	0	0	0.934977	0	0.550317	no
TRBV3_TRBJ1-5_TRBD2	2.18327	6.38796	1.17966	2.73147	2.56807	0.938995	5.36373	1.77842	5.2982	0	0.821168	no
TRBV31_TRBJ1-1_TRBD1	2491.42	4437.2	226.888	93.9627	11562.7	74.6501	32.595	168.505	20.8812	0.541401	0.153821	no
TRBV29_TRBJ2-3_TRBD2	93.8804	95.8193	34.2102	6049.12	6.09917	21.5969	41.2594	24.4533	5.92152	0	0.360253	no
TRBV13-1_TRBJ1-1_TRBD2	83.8998	57.4916	66.061	3798.39	47.8303	82.1621	0.412594	4.44605	17.1412	113.153	0.362472	no
TRBV12-1_TRBJ1-1_TRBD2	23.704	32.5482	0	51.898	0	0	0	14.2274	108.769	3.24841	0.881782	no
TRBV13-3_TRBJ1-3_TRBD1	4406.45	1918.52	6324.55	10791.5	175.913	12.6764	4.95113	65.3569	36859	1.6242	0.741462	no
TRBV19_TRBJ2-2_TRBD1	0	12.1675	0	0	0	0	2.06297	80.9181	0.311659	0	0.428822	no
TRBV4_TRBJ2-7_TRBD1	22.7683	21.9016	0.39322	8.19442	1.60504	81.2231	0	53.3526	0	101.783	0.156962	no
TRBV31_TRBJ1-2_TRBD1	2132.12	5691.97	14196.4	9191.41	24.0757	12.6764	40.0217	32.4562	5.92152	1.6242	0.0694109	no
TRBV13-1_TRBJ2-3_TRBD1	136.922	594.08	4540.51	106.528	6841.34	37.5598	0	241.421	24.6211	17.3248	0.159117	no
TRBV13-2_TRBJ1-1_TRBD2	1375.46	1151.96	355.078	203.222	17.0135	346.02	12.3778	0.88921	141.182	181.369	0.148973	no
TRBV23_TRBJ1-6_TRBD1	91.6972	0	0.786441	0	0	0	0	0	0	0	0.369328	no
TRBV13-2_TRBJ2-7_TRBD1	15610.4	3750.95	48768.7	286.805	8651.83	5423.63	2.06297	22728.7	198.215	553.853	0.362236	no
TRBV5_TRBJ2-2_TRBD2	1518.31	5332.12	5728.04	3821.33	247.819	119.252	13165.1	33067.5	171.724	22.7388	0.40998	no
TRBV24_TRBJ1-6_TRBD2	0	0	0	0	0.321009	0	0	0	0	0	0.373901	no
TRBV13-2_TRBJ1-2_TRBD2	63.3147	48.9743	3909	50.8054	8.66724	55.4007	24.7557	1.77842	8.72645	8.12101	0.361267	no
TRBV3_TRBJ2-2_TRBD1	28.6944	197.418	7.07796	3.27777	15.4084	5.16447	3.71335	0	13.4013	4.33121	0.290777	no
TRBV30_TRBJ2-1_TRBD2	16.5304	9.12565	106.956	37.6944	3.85211	345.55	252.92	61.3555	1.86995	0.541401	0.243828	no
TRBV12-2_TRBJ1-5_TRBD1	17.778	0.912565	0	0	0	0	0	0	0	0	0.347436	no
TRBV30_TRBJ2-7_TRBD1	14.0353	3.65026	29.8847	4.91665	5.77816	2.81698	0	39.1252	3.42825	0	0.782957	no
TRBV19_TRBJ2-2_TRBD2	27.1349	24.6393	0	0	0	0	0.825189	75.5829	0.311659	0	0.771654	no
TRBV5_TRBJ1-4_TRBD2	28.3825	47.1492	52.2983	75.935	68.6959	91.552	56.5254	217.856	300.751	111.529	0.0881044	no
TRBV13-3_TRBJ1-2_TRBD1	13654.1	1796.54	86.5085	15051	65.8068	240.852	15683.5	11.5597	27330.9	0.541401	0.710455	no
TRBV21_TRBJ1-5_TRBD1	0.311895	2.7377	0	0	0	0	0	0.88921	0	0	0.479166	no
TRBV4_TRBJ1-4_TRBD1	3.43085	11.255	15.3356	0	1.92605	15.0239	0	130.269	0.311659	0	0.423869	no
TRBV3_TRBJ2-4_TRBD1	1642.44	573.699	2.75254	720.017	10.9143	8.92045	18.5667	9.33671	88.1995	0.541401	0.133253	no
TRBV21_TRBJ1-4_TRBD2	0.311895	0.608377	0	0	0	0	0	24.4533	0.311659	0	0.383453	no
TRBV4_TRBJ1-1_TRBD1	4.67843	0.912565	214.698	25.1296	45.2622	0.938995	13.203	0	0	0	0.238585	no
TRBV2_TRBJ1-6_TRBD1	0	2.12932	35.3898	0	16.3715	0	0	0	0	0	0.1918	no
TRBV29_TRBJ2-2_TRBD2	57.3887	766.25	8.65085	1660.19	3.85211	3.28648	94.0715	26.6763	0.934977	0	0.217328	no
TRBV1_TRBJ1-5_TRBD2	72.3597	129.28	48.7593	16.3888	186.185	91.552	230.64	128.491	47.9955	130.478	0.433194	no
TRBV12-2_TRBJ2-5_TRBD2	2.18327	0.608377	0	101.611	8.98825	0	0	0	0.311659	0	0.317051	no
TRBV13-3_TRBJ2-2_TRBD2	4725.21	105.858	7.86441	92.8701	23.1126	5.63397	2.47557	194.737	43.6323	1.0828	0.370538	no
TRBV14_TRBJ1-5_TRBD2	1.24758	2.12932	0	1.63888	0.642018	0.938995	0	0.444605	0.623318	5.41401	0.753032	no
TRBV30_TRBJ1-4_TRBD2	2.18327	1.21675	25.5593	4.91665	2.88908	3.28648	4.95113	72801.4	2.49327	2.1656	0.374023	no
TRBV20_TRBJ2-2_TRBD1	0.311895	0.304188	1.9661	0	0.642018	0	0	0	0.623318	0	0.215698	no
TRBV3_TRBJ2-5_TRBD1	657.163	68.4424	780.935	1863.41	33.0639	2216.5	31.3572	13.7828	17.7646	0	0.695036	no
TRBV17_TRBJ2-1_TRBD2	1539.51	2.43351	0.786441	446.323	0.963027	1.87799	0	0	6.23318	1.0828	0.254599	no
TRBV13-2_TRBJ2-2_TRBD2	4020.95	1741.17	11865.4	4891.52	34.99	176.062	66.8403	77.3613	11289.2	6.49681	0.489991	no
TRBV26_TRBJ1-5_TRBD1	4151.32	1742.39	0	39.8795	62.9177	2.34749	144.408	0	14.0247	0.541401	0.222584	no
TRBV13-1_TRBJ1-5_TRBD2	23.0802	44.1073	12.583	14.75	0.963027	17.3714	0	0	0.934977	2.1656	0.110044	no
TRBV31_TRBJ1-5_TRBD1	503.399	1682.47	6192.04	18.574	45.9043	15.0239	133.681	28.4547	16.8296	0	0.229932	no
TRBV19_TRBJ1-3_TRBD1	0.935685	9.42984	0	0	0	0	0.825189	0	0	0	0.361048	no
TRBV12-1_TRBJ1-4_TRBD2	48.9675	23.4225	0.39322	34.4166	0	0	0	22.6749	4.05157	18.4076	0.291283	no
TRBV2_TRBJ2-4_TRBD1	6.2379	17.3387	0	0	0	0	0	0	0	0	0.235371	no
TRBV1_TRBJ2-5_TRBD1	11159	11201.7	5126.02	243.101	36994	25732.2	32294.2	537.083	14717.2	106.656	0.853548	no
TRBV2_TRBJ1-5_TRBD1	6.86169	0	0.39322	37.1481	0	0	0	0	16.2063	0	0.503305	no
TRBV21_TRBJ2-4_TRBD1	0.311895	1.52094	0	0	0	0	0.412594	65.3569	21.1928	0	0.250076	no
TRBV13-2_TRBJ2-4_TRBD1	7404.08	7230.56	2883.09	3531.25	251.029	12629.5	34.2453	36516.8	320.074	16.242	0.474742	no
TRBV14_TRBJ2-3_TRBD1	577.942	8.21309	10.2237	22.9444	61.9547	11.2679	0	14.2274	3.42825	10.828	0.311519	no
TRBV4_TRBJ2-5_TRBD1	24.9516	0	0	10.3796	0.963027	54.4617	0	0	60.4618	203.567	0.205256	no
TRBV20_TRBJ1-5_TRBD1	0	133.234	1.17966	0	0.321009	0.469497	0	0	0	0	0.369396	no
TRBV30_TRBJ1-6_TRBD1	3.74274	2.12932	11.7966	2.73147	2.56807	7.04246	4.53854	55.131	0	0	0.45667	no
TRBV13-3_TRBJ1-5_TRBD2	46.4724	23.4225	1.17966	12.5648	2.88908	0.938995	0	2.22303	2.49327	0	0.123188	no
TRBV31_TRBJ1-6_TRBD2	9.04496	9.73403	66.061	7.64813	0.963027	3.28648	2.06297	5.33526	4.67489	0	0.261572	no
TRBV3_TRBJ1-1_TRBD1	260.432	627.845	9.04407	36.0555	1502.64	17.8409	4.12594	15.1166	19.6345	60.6369	0.169438	no
TRBV5_TRBJ1-2_TRBD1	138.793	4034.75	9778.6	3001.89	151.195	176.062	11548.5	87.1426	261.482	87520.2	0.389091	no
TRBV31_TRBJ2-5_TRBD1	58.3244	3096.03	95.5525	95.6016	19.5815	29.1088	46.2106	43677.6	37.7107	0.541401	0.407345	no
TRBV15_TRBJ2-4_TRBD2	210.529	3248.12	0.786441	96.1479	10.2723	0.469497	0	0	90.3811	0	0.335209	no
TRBV13-1_TRBJ2-7_TRBD2	9773.23	3071.39	17659.1	7691.83	7625.57	18596.3	1.23778	2.22303	51.4237	468.853	0.265015	no
TRBV4_TRBJ2-1_TRBD2	28.0706	30.723	0.39322	24.037	1.28404	107.045	0.412594	0.444605	5.60986	0.541401	0.800349	no
TRBV13-2_TRBJ1-6_TRBD2	179.963	22.2057	18.4814	20.7592	1.92605	114.088	59.4136	2.66763	8.10313	2.707	0.784496	no
TRBV13-3_TRBJ1-3_TRBD2	20.897	17.6429	253.234	25.1296	3.85211	0.469497	0	0.88921	18.6995	0	0.273846	no
TRBV4_TRBJ1-3_TRBD1	5.61411	4.56283	0	0	14.4454	45.5413	0	0	0	0	0.678786	no
TRBV31_TRBJ2-7_TRBD2	1123.45	1300.1	8476.26	13999.4	24.3967	38.0293	1.65038	92.4779	9.34977	0.541401	0.141065	no
TRBV4_TRBJ1-5_TRBD1	0	7.9089	0.39322	0	0.321009	17.3714	0	0	0	0.541401	0.641921	no
TRBV13-3_TRBJ1-4_TRBD2	82.9641	36.5026	5.11186	4014.72	3.21009	1.40849	0.412594	17.7842	19.9462	0	0.361214	no
TRBV19_TRBJ1-5_TRBD1	13.0996	0.608377	0	0	0	0.469497	0	0	105.341	0	0.432662	no
TRBV12-2_TRBJ1-1_TRBD1	0.311895	89.7356	0	0	0.321009	0	0	0	0	0	0.370129	no
TRBV24_TRBJ1-1_TRBD1	33.9966	38.0235	0	7.64813	0	0	0.412594	0.444605	28.6726	0	0.353413	no
TRBV30_TRBJ1-3_TRBD1	4.36653	4.56283	18.4814	8.19442	5.13614	5.16447	1.65038	0.88921	8.41479	0	0.159634	no
TRBV12-2_TRBJ1-3_TRBD1	47.4081	121.98	0	65.0091	0	0	0	0	0	0	0.108535	no
TRBV2_TRBJ2-5_TRBD1	16.5304	0	0	0	37.237	21.5969	0.412594	0	0	0	0.482193	no
TRBV15_TRBJ2-3_TRBD1	189.32	2484.61	0	83.0368	51.6824	4.22548	0.412594	0	60.1502	0	0.318266	no
TRBV3_TRBJ2-5_TRBD2	927.888	1636.53	778.576	553.943	3567.69	78.4061	4184.53	54.2418	6949.37	1.0828	0.638259	no
TRBV16_TRBJ1-5_TRBD2	4.99032	5.77958	1.57288	3.27777	0	3.28648	0	0.444605	1.24664	0	0.131449	no
TRBV3_TRBJ2-4_TRBD2	1526.41	1278.5	5.11186	12.0185	9.30926	7.04246	27.2312	6.22447	13587.4	2.707	0.472889	no
TRBV13-3_TRBJ2-4_TRBD1	1361.42	81.5225	7.47118	120.731	92.1295	39.4378	3.71335	208.075	224.706	0	0.413751	no
TRBV15_TRBJ1-3_TRBD2	30.5657	62.3586	0	10.9259	3.21009	0	0	0	1.86995	0	0.142193	no
TRBV30_TRBJ2-5_TRBD1	7.48548	2.43351	8.65085	6.00924	32.1009	37.0903	7.83929	49.3512	7.16816	0	0.446343	no
TRBV30_TRBJ2-2_TRBD2	0	2.43351	39.322	0.546295	1.92605	4.22548	40.4342	33.79	2.49327	0	0.542008	no
TRBV21_TRBJ1-5_TRBD2	0	0.912565	0	0	0	0	0	1.33382	0	0	0.801785	no
TRBV26_TRBJ1-1_TRBD2	17.778	1694.02	0	110.352	3.21009	2.81698	0.412594	0	114.067	0	0.363248	no
TRBV19_TRBJ2-3_TRBD2	26.823	17.3387	0	0	0	0	0	0	2.49327	0	0.212161	no
TRBV1_TRBJ1-6_TRBD1	4930.44	15851.9	59578.4	9892.86	15555.1	11263.2	27457.3	103.148	41.139	375.732	0.277308	no
TRBV19_TRBJ2-3_TRBD1	12.7877	13.6885	0	27.3147	0	0	1.23778	1.77842	2.80493	0	0.13262	no
TRBV12-2_TRBJ2-4_TRBD2	13.7234	38.9361	0	0	0.642018	0	0	0	5.2982	0	0.27337	no
TRBV15_TRBJ2-1_TRBD1	4939.79	421.605	0.786441	19043.3	117.81	1.40849	0	0	15.8946	1.6242	0.250882	no
TRBV31_TRBJ2-7_TRBD1	1651.17	2794.27	109.315	110.898	26.0017	55.8702	83.7567	99212.3	2.80493	1.6242	0.393967	no
TRBV4_TRBJ2-1_TRBD1	19.0256	13.0801	12.583	0.546295	52.0034	73.7111	0	0	0.311659	0.541401	0.798729	no
TRBV5_TRBJ2-7_TRBD1	12306.1	1502.99	435.295	7527.94	11000.3	4517.5	139.457	55939.3	15638.1	337.834	0.459243	no
TRBV19_TRBJ1-1_TRBD2	4.67843	0.608377	0	1.09259	0	0	0.412594	0.444605	0.311659	0	0.300619	no
TRBV26_TRBJ2-4_TRBD2	2344.2	175.821	0	43.1573	43.0152	5.16447	7.0141	0	219.72	0	0.358127	no
TRBV1_TRBJ1-1_TRBD2	1271.28	4225.48	6344.22	174.814	195.815	10416.3	381.237	256.537	330.359	12.9936	0.947377	no
TRBV13-2_TRBJ1-1_TRBD1	11324	2350.77	89795	9569.99	9545.52	36045.2	172.464	432.601	115.937	22246.7	0.508172	no
TRBV20_TRBJ1-1_TRBD1	688.664	1.21675	4.32542	1.63888	0.321009	1.87799	0	0.444605	0.311659	1.0828	0.370383	no
TRBV16_TRBJ2-7_TRBD1	6644.3	996.825	2.35932	3874.32	15.0874	1438.07	0	22.6749	4982.18	26.5286	0.549161	no
TRBV31_TRBJ2-1_TRBD1	109.163	48.6701	8200.61	97.2405	151.195	30.9868	44.1476	229.416	4.98654	0	0.363614	no
TRBV30_TRBJ1-1_TRBD1	13.4115	8.51727	53.0847	3.27777	9.63027	34.7428	51.9869	105.371	333.475	0	0.216915	no
TRBV20_TRBJ1-5_TRBD2	0	0	0.786441	0.546295	0.321009	0	0	0	0	0	0.097903	no
TRBV15_TRBJ2-2_TRBD1	9189.37	75.4387	1.57288	36.6018	34.99	0.938995	0.412594	0	4.67489	0	0.365561	no
TRBV13-1_TRBJ2-4_TRBD2	5115.39	930.208	92.8	187.925	12.5193	2756.42	0.412594	2.22303	438.816	22.1974	0.594706	no
TRBV13-2_TRBJ1-3_TRBD1	11846.4	5397.21	8273.75	3182.71	7544.67	10194.7	11.9652	4.89066	20924.2	43287.7	0.402316	no
TRBV16_TRBJ2-7_TRBD2	4720.22	3682.5	1.9661	106.528	8.66724	20445.2	0	1.33382	9.34977	37.8981	0.597051	no
TRBV30_TRBJ2-5_TRBD2	4.67843	3.34607	8347.28	5.46295	9.63027	26.2919	31.7698	48.462	22.4394	0	0.379085	no
TRBV2_TRBJ2-3_TRBD1	13.4115	18.2513	0.39322	17.4814	0.321009	0	0	0	0.311659	0	0.06887	no
TRBV5_TRBJ1-6_TRBD1	1025.51	7527.14	208.014	10.9259	6841.02	2986.94	259.109	137.828	31.7892	57447	0.471952	no
TRBV23_TRBJ2-3_TRBD2	1.55948	0	0.786441	0.546295	0	0	0	0	0	0	0.116349	no
TRBV24_TRBJ2-2_TRBD1	0	0	0	0	0	0	0	0	3.11659	0	0.373901	no
TRBV17_TRBJ1-4_TRBD1	2.49516	95.8193	0.786441	7.64813	1.28404	0.938995	0	0	0.934977	0.541401	0.319379	no
TRBV26_TRBJ1-4_TRBD1	9476.93	2244.3	0.786441	9253.14	83.1413	39.4378	2.06297	2.22303	8944.3	1.0828	0.412842	no
TRBV29_TRBJ1-1_TRBD1	8474.19	8334.46	43.6474	160.064	48.1513	4190.73	280.564	27465	13.0897	1.0828	0.623343	no
TRBV24_TRBJ1-4_TRBD2	0	0.304188	0	0	0	0	0	0	0	0	0.373901	no
TRBV26_TRBJ2-2_TRBD1	2090.94	45.0199	0.39322	10.3796	74.7951	3.28648	13.6156	2.66763	14496.8	0	0.446486	no
TRBV16_TRBJ1-5_TRBD1	20.897	17.6429	9.83051	1.63888	8.02522	14.5544	0	0	2.80493	5.41401	0.148104	no
TRBV16_TRBJ1-3_TRBD1	1402.9	1209.45	2.35932	2152.95	38.2001	11.7374	0.412594	0.444605	47.3722	14.0764	0.0848559	no
TRBV13-3_TRBJ1-4_TRBD1	6695.76	1235.92	14.5491	215.787	5924.22	40.3768	0.412594	92.0333	79.7847	0.541401	0.127448	no
TRBV17_TRBJ2-3_TRBD2	148.774	3.95445	0	1.63888	0.642018	0.469497	0	0	0.311659	0	0.354045	no
TRBV19_TRBJ1-3_TRBD2	1.24758	0.304188	0	0	0	0	0	0	0	0	0.268283	no
TRBV15_TRBJ1-4_TRBD1	1864.51	2321.87	11.4034	148.592	55.5345	10.3289	0	0	4.36323	0	0.154684	no
TRBV14_TRBJ2-2_TRBD1	460.981	6.08377	11.0102	953.831	28.5698	11.7374	0	3.55684	4.67489	10657.5	0.436641	no
TRBV31_TRBJ2-1_TRBD2	3060.31	41.6738	6360.34	11579.3	6801.86	23.4749	41.2594	38411.7	3.11659	3.24841	0.80003	no
