# Supplementary material for: The T Cell Receptor Immune Repertoire Protects the Liver From Reconsitution
Source: Front Immunol. 2020 Dec 18;11:584979. doi: 10.3389/fimmu.2020.584979 (PMC7775400; doi:10.3389/fimmu.2020.584979)
Supplement: Supplementary file 12 [file Table_11.xlsx]

## Sheet: TRB CDR3
V region	Ctrl-1	Ctrl-2	Ctrl-3	Ctrl-4	Ctrl-5	CCl4-1	CCl4-2	CCl4-3	CCl4-4	CCl4-5	P value	sig
CSADQGAGNTLYF	0.249213	0.125119	0.138099	0	0.120294	0	0	0	0	0	0.0328351	down
CASSQGDLGWSHISQILYNNEPASF	0.249213	0	0.552396	0.308577	0.481177	0	0	0	0.122106	0	0.0365002	down
CASSGAGTEVLF	0.872244	0.500474	0.414297	1.08002	0.721765	0.294952	0	0	0.732637	0	0.0267418	down
CAWSHISQILYNNEPASF	2.11831	0.87583	1.79529	2.31433	1.56382	1.32728	0.896508	0.396319	1.58738	0	0.0495942	down
CACESGSF	0.249213	0.250237	0.138099	0.308577	0.360882	0.147476	0	0.132106	0.244212	0	0.032082	down
CSADARDTLYFCASSPGDWGEQYF	0	0	0	0	0	0	0.256145	0	0	0	0.373901	no
CSAGGVDTEVF	0	0	0.552396	0	0	0	0	0	0	0	0.373901	no
CASSRDSSGNTIYF	0	1.3763	0	0	0	0	0	0	0	0	0.373901	no
CASGDTGGDYAEQF	0.124606	0	0	0	0	0	0	0	0	0	0.373901	no
CSAEGQNSDYSF	0	0	0	0	0	0.147476	0	0	0	0	0.373901	no
CMALSYERLF	0	0	0	0	0.481177	0	0	0	0	0	0.373901	no
CASSFRGGYAEQF	0	0.125119	0	0	0	0	0	0	0	0	0.373901	no
CTSSLDGEENTEVF	0.498425	0	0	0	0	0	0	0	0	0	0.373901	no
CASGPADRVTEVF	0	0	0.552396	0	0	0	0	0	0	0	0.373901	no
CTRDRNTEVF	0.124606	0	0	0	0	0	0	0	0	0	0.373901	no
CASSFPGQTEGVF	0	0	0	0	0	0.147476	0	0	0	0	0.373901	no
CSAGSGGLDTLYF	0	0	0.414297	0	0	0	0	0	0	0	0.373901	no
CSLEIQSSEAGDSALHLYASSLTRGHTEVF	0	0.125119	0	0	0	0	0	0	0	0	0.373901	no
CASGDAGTGEGENTLYF	0	0.500474	0	0	0	0	0	0	0	0	0.373901	no
CSAGIWGGEDTQYF	0	0	0	0	0	0	0	0	0.122106	0	0.373901	no
CSAGDHTADF	0	0	0.138099	0	0	0	0	0	0	0	0.373901	no
CASSPTTGNQDAPTAGEQYF	0	0.125119	0	0	0	0	0	0	0	0	0.373901	no
CASPDSVYAEQF	0.124606	0	0	0	0	0	0	0	0	0	0.373901	no
CSAPPGHHNQASLF	0.498425	0	0	0	0	0	0	0	0	0	0.373901	no
CASSDASRGCEQYF	0	0.625593	0	0	0	0	0	0	0	0	0.373901	no
CASGDDWGGQNTLDF	0	0.125119	0	0	0	0	0	0	0	0	0.373901	no
CASRPCDWGYAEQF	0	0	0	0.154288	0	0	0	0	0	0	0.373901	no
CASGDAPGGIKQYF	0	0	0	0	0	1.03233	0	0	0	0	0.373901	no
CAWRRGQGSNEQYF	0	0.625593	0	0	0	0	0	0	0	0	0.373901	no
CSAGPDNERLF	0	0	0.552396	0	0	0	0	0	0	0	0.373901	no
CASSTGCLAPSADRADTEVF	0	0	0	0	0	0	0	0	0.366318	0	0.373901	no
CPSSLAQGWAEQF	0	0.125119	0	0	0	0	0	0	0	0	0.373901	no
CASSEDLSYNNQAPLF	0	0	0	0.462865	0	0	0	0	0	0	0.373901	no
CASSDSLGGDTRHF	0	0	0	0	0	0	0	0	0.366318	0	0.373901	no
CRAWGQDTQYF	0	0	0	0	0	1.32728	0	0	0	0	0.373901	no
CPRRAGTGGAGEQYF	0	0.125119	0	0	0	0	0	0	0	0	0.373901	no
CTSSALGGLAVQF	0	0	0	0	0	0	0	0.264212	0	0	0.373901	no
CAGGDGQGEQYF	0	0	0	0	0	5.16166	0	0	0	0	0.373901	no
CASGDGTGAYAEQF	0.249213	0	0	0	0	0	0	0	0	0	0.373901	no
CASRTINEDTQYF	0	0	0	0	0	0	0	0	0.122106	0	0.373901	no
CASSDATGVNTGQLYF	0.498425	0	0	0	0	0	0	0	0	0	0.373901	no
CATKTGERTEVF	0	0	0	0.154288	0	0	0	0	0	0	0.373901	no
CTFSLGLSSYEQYF	0.498425	0	0	0	0	0	0	0	0	0	0.373901	no
CASSPGGSDYTFGSGGQNTLYF	0	0	0	0.462865	0	0	0	0	0	0	0.373901	no
CSADRSGGGTQHF	0	0	0	0	0.120294	0	0	0	0	0	0.373901	no
CATSQEGGGYAEQF	0	0	0	0	0	0.147476	0	0	0	0	0.373901	no
CASGDANMSQGRTLYCTCSAPGTDGTEVF	0	0	0	0.154288	0	0	0	0	0	0	0.373901	no
CIAEVAEQF	0	0.125119	0	0	0	0	0	0	0	0	0.373901	no
CSAEHSTEF	0.124606	0	0	0	0	0	0	0	0	0	0.373901	no
CASSQEWVDQDTQYF	0.498425	0	0	0	0	0	0	0	0	0	0.373901	no
CSGGQGREDTQYF	0	0.125119	0	0	0	0	0	0	0	0	0.373901	no
CASSQEGVSSYEQYF	0	0	0	0	0	0	0	0	0.244212	0	0.373901	no
CASSLRDMEDEQHF	0	0	0	0	0	0	0	0.132106	0	0	0.373901	no
CASGGENFGNTLYF	0.249213	0	0	0	0	0	0	0	0	0	0.373901	no
CSAQGSNTELF	0	0.125119	0	0	0	0	0	0	0	0	0.373901	no
CNAGTAGYNSPLYF	0.124606	0	0	0	0	0	0	0	0	0	0.373901	no
CSADWGLDTHYF	0.124606	0	0	0	0	0	0	0	0	0	0.373901	no
CSAAANNERLF	0	0	0	31.9377	0	0	0	0	0.122106	0	0.375547	no
CASGTGTGANTLYF	0	0.125119	0	0	0	0	0	0	0	0	0.373901	no
CASSGLGNTEVF	0	0	0	0	0	0.147476	0	0	0	0	0.373901	no
CASGDATGGARNPLYF	0	0	0	0	0	0	0	0	0.122106	0	0.373901	no
CASGDGGQGVAKTEVF	0.124606	0	0	0	0	0	0	0	0	0	0.373901	no
CTRSADGTLNQDTQYF	0	5.3801	0	0	0	0	0	0	0	0	0.373901	no
CAWSLGGGSSYEQYF	0	0.125119	0	0	0	0	0	0	0	0	0.373901	no
CASSQGAHNERLF	0	0	0	0	0	4.71923	0	0	0	0	0.373901	no
CASGGPGSYEQYF	0	0	0	0	0.842059	0	0	0	0	0	0.373901	no
CASSEGTGNERLF	0	0	0	0.154288	0	0	0	0	0	0	0.373901	no
CASSQSREHYVEQF	0	0	0	0	0	0	0	0.132106	0	0	0.373901	no
CAQHLSRRHCTRSADPVNTLYF	0	0	0	0	0	0	0.128073	0	0	0	0.373901	no
CTSGDYNYEQYF	0	0	0	0	0	1.47476	0	0	0	0	0.373901	no
CSAKGHTSAETLYF	0	0	0.138099	0	0	0	0	0	0	0	0.373901	no
CAWSPGGNQDTQYF	0	0.750711	0	0	0	0	0	0	0	0	0.373901	no
CTGSADDSSYEQYF	0.373819	0	0	0	0	0	0	0	0	0	0.373901	no
CTYSAGDRGAETLYF	0	0	0	0	0	0	0	0	7.69268	0	0.373901	no
CASSDTTDSGNTLYF	0	0	0	0	0	0	0	9.64375	0	0	0.373901	no
CGSSRRDRGQDTQYF	0	0.125119	0	0	0	0	0	0	0	0	0.373901	no
CASSLTGAGAVQF	0	0	0	0	0.842059	0	0	0	0	0	0.373901	no
CASCRGDAEQF	0	0	0	0	0	0.442428	0	0	0	0	0.373901	no
CSADTSHEQYF	0	0	4.83347	0	0	0	0	0	0	0	0.373901	no
CASGGRTGRSGNTLYF	0	0	0	0	0.240588	0	0	0	0	0	0.373901	no
CSADSGTVEQYF	0.373819	0	0	0	0	0	0	0	0	0	0.373901	no
CASSQSGGDNQDTQYF	0	0	0	0	0	0	0	0.132106	0	0	0.373901	no
CGSSGLGRTEQF	0	0	0	0	0	0	0	0	0	0.249076	0.373901	no
CASSDVQGAYTGQLYF	0	0.125119	0	0	0	0	0	0	0	0	0.373901	no
CASSPTGGSAEPLYF	0	0	0	0.154288	0	0	0	0	0	0	0.373901	no
CSADADWGADYAEQF	0	0.125119	0	0	0	0	0	0	0	0	0.373901	no
CASSQEDRGRNAQYF	0	3.25308	0	0	0	0	0	0	0	0	0.373901	no
CASSAEWAVSTEVF	0	0	0	0	0	0	0	0	0.122106	0	0.373901	no
CASSPRDRVF	0	3.50332	0	0	0	0	0	0	0	0	0.373901	no
CGSRRGDNQDTQYF	0	0	0	0.308577	0	0	0	0	0	0	0.373901	no
CDSGGFRDTEVF	0	0	0	0	0	0.147476	0	0	0	0	0.373901	no
CASSLTGRSNERLF	0.124606	0	0	0	0	0	0	0	0	0	0.373901	no
CASSQDPGGRTQYF	0	0	0	0	0	0	2.17723	0	0	0	0.373901	no
CASSRGTGPGNTLYF	0	0.125119	0	0	0	0	0	0	0	0	0.373901	no
CASGLGVTEVF	0	2.12702	0	0	0	0	0	0	0	0	0.373901	no
CSAPGGRNNGQLYF	0	0	0	0	0	0	0	0	0.244212	0	0.373901	no
CASTEGQGGDTQYF	0	0.125119	0	0	0	0	0	0	0	0	0.373901	no
CSRGTFDTEVYF	0	0	0	0	0	0.147476	0	0	0	0	0.373901	no
CSADGGQTTEVF	0	0.500474	0	0	0	0	0	0	0	0	0.373901	no
CRQAYNSPLYF	0	0	0	0	0.120294	0	0	0	0	0	0.373901	no
CASSLDSQASAATLYF	0.124606	0	0	0	0	0	0	0	0	0	0.373901	no
CSAGRGRSNERLF	0.373819	0	0	0	0	0	0	0	0	0	0.373901	no
CASSFRGDAETLYF	0	0.250237	0	0	0	0	0	0	0	0	0.373901	no
CSRDNNQTPLF	0.373819	0	0	0	0	0	0	0	0	0	0.373901	no
CDGSDRSSYEQYF	0	0	0	0	0.120294	0	0	0	0	0	0.373901	no
CASSLTGGDTRYF	0	0	0	0	1.68412	0	0	0	0	0	0.373901	no
CRARLGGASAETLYF	0	0	0	0	0	0	0	0	0	0.373614	0.373901	no
CASSDAGTVDAEQVF	0	0	0	0	0	0	0	0	0.122106	0	0.373901	no
CASGDAEVASDYTF	0.872244	0	0	0	0	0	0	0	0	0	0.373901	no
CSAVGDNQYF	0	0	0	0	0.721765	0	0	0	0	0	0.373901	no
CASGAGTNNNKAPLF	0	0	0.138099	0	0	0	0	0	0	0	0.373901	no
CASSQGGGRSYEQYLYF	0	0	0	0	0	0	0	0	0	0.124538	0.373901	no
CSAELGPSAEALYF	0	1.25119	0	0	0	0	0	0	0	0	0.373901	no
CASSQARGYEQYF	0	1.75166	0	0	0	0	0.128073	0	0	0	0.407072	no
CSDWENTGQLYF	0	0	0	0.154288	0	0	0	0	0	0	0.373901	no
CASGEGTGGNQDTPYF	0.373819	0	0	0	0	0	0	0	0	0	0.373901	no
CSANRGGAAETLYF	0	0	0	0	0	0	0	0	0.122106	0	0.373901	no
CASIAGTGNTGQLYF	0.249213	0	0	0	0	0	0	0	0	0	0.373901	no
CASSRQGDRNTEVF	0	0	0	2.46862	0	0	0	0	0	0	0.373901	no
CDSGDATGNERLF	0	0	0.276198	0	0	0.147476	0	0	0	0	0.695021	no
CSVGQNTQYF	0	0.125119	0	0	0.962353	0	0	0	0	0	0.311219	no
CSAEGQGAGQLYNCESGSF	0	0	0.276198	0	0	0	0	0	0	0	0.373901	no
CASSPGVRTEVF	0	1.25119	0	0	0	0	0	0	0	0	0.373901	no
CSAELRYNSPLYF	0.747638	0	0	0	0	0	0	0	0	0	0.373901	no
CGAGGAGEQCF	0	0.125119	0	0	0	0	0	0	0	0	0.373901	no
CASSPRSSADTLYF	0.249213	0	0	0	0	0	0	0	0	0	0.373901	no
CAGGETTSTGQLYF	0.124606	0	0	0	0	0	0	0	0	0	0.373901	no
CRLRGWDPQYF	0	0	0	0	0.120294	0	0	0	0	0	0.373901	no
CAWSLETCEQYF	0.124606	0	0	0	0	0	0	0	0	0	0.373901	no
CASSLDRGANTRQPYF	0	0	0	0	0	0	0	0	0.244212	0	0.373901	no
CASNRDWGAPETLYF	0.249213	0	0	0	0	0	0	0	0	0	0.373901	no
CTCSAGTVYAEQSF	0	0	0	0	0	0	0	0.132106	0	0	0.373901	no
CSAGTASGNTLF	0	0.375356	0	0	0	0	0	0	0	0	0.373901	no
CASGVAGTREYEQISNERLF	0.124606	0	0	0	0	0	0	0	0	0	0.373901	no
CSADTGNTLYF	0.124606	0	0	0	0	0	0	0	0	0	0.373901	no
CASSEAGGAETLYF	0	0	0	0	0	0.442428	0	0	0	0	0.373901	no
CASSQDLVNQDTEVF	0	0	0	0	0.842059	0	0	0	0	0	0.373901	no
CSADECSCNSPLYF	0	0	0	0	0	0	0	0	0	0.124538	0.373901	no
CAWSQLRGAETRYF	0	0	0.138099	0	0	0	0	0	0	0	0.373901	no
CASRDQDTKYF	0	0.125119	0	0	0	0	0	0	0	0	0.373901	no
CARQINTEVF	0	0	0	0	0.240588	0	0	0	0	0	0.373901	no
CAWGGGGDTEVF	0	0	0.138099	0	0	0	0	0	0	0	0.373901	no
CASSPGTNNSPLSF	0.124606	0	0	0	0	0	0	0	0	0	0.373901	no
CTAGASRNEQYF	0	0	0	0.154288	0	0	0	0	0	0	0.373901	no
CASSPGTGVYERYF	0	0	0	2.31433	0	0	0	0	0	0	0.373901	no
CASSQDLTGASAETLNF	0.872244	0	0	0	0	0	0	0	0	0	0.373901	no
CASGADWVNYAEQF	0	0	0	0	0	0	0	0	0.976849	0	0.373901	no
CASRVTDTALRLQVANMSQGRTLYCTCSAGTGVNQAPLF	0	0	0	0	0.120294	0	0	0	0	0	0.373901	no
CSRHSNSGNTLYF	0.124606	0	0	0	0	0	0	0	0	0	0.373901	no
CASNDAAGAEQF	1.37067	0	0	0	0	0	0	0	0	0	0.373901	no
CSADGRRTEVF	0	0	0	0.462865	0	0	0	0	0	0	0.373901	no
CASSGPLQDTQYF	0	0	2.48578	0	0	0	0	0	0	0	0.373901	no
CSADANKERLYF	0	0	0	0.154288	0	0	0	0	0	0	0.373901	no
CASNGDREGTQYF	0	0.250237	0	0	0	0	0	0	0	0	0.373901	no
CSADDGNSAEQF	0.124606	0	0	0	0	0	0	0	0	0	0.373901	no
CASSRLEGANTGQLYF	0	0	0	0	0	0	0	0	0.366318	0	0.373901	no
CSADEGSYNSALCF	0	0	0	0	0	0	0	0	0	0.124538	0.373901	no
CASGDAGTGGRDNTLYF	0	0.125119	0	0	0	0	0	0	0	0	0.373901	no
CASSGAGVYTAEVF	0.124606	0	0	0	0	0	0	0	0	0	0.373901	no
CASSATGDEQYF	0.124606	0	0	0	0	0	2.8176	0	0	0	0.393532	no
CASSCGAETLYF	0	0	0	0.462865	0	0	0	0	0	0	0.373901	no
CASGGTGGNQDIQYF	0.249213	0	0	0	0	0	0	0	0	0	0.373901	no
CASSDPTGSSYERLF	0.373819	0	0	0	0	0	0	0	0	0	0.373901	no
CASGAAGTANTEVF	0	0	0	0	0	0.294952	0	0	0	0	0.373901	no
CASSLTGTQDNQAPLF	0	0.125119	0	0	0	0	0	0	0	0	0.373901	no
CANGGDTQAQHF	0	0	0	0	0	0	0.128073	0	0	0	0.373901	no
CSAGGQKNTLYF	0	0	0	0	0	2.65457	0	0	0	0	0.373901	no
CASSQGLGVSYELYF	0	0	0.828595	0	0	0	0	0	0	0	0.373901	no
CASSPGPSQNTEVF	0.498425	0	0	0	0	0	0	0	0	0	0.373901	no
CSARTGGDSQYF	0	0.250237	0	0	0	0	0	0	0	0	0.373901	no
CASGPGLGLGQLSF	0	0.250237	0	0	0	0	0	0	0	0	0.373901	no
CASGDAGSSCEQYF	0.124606	0	0	0	0	0	0	0	0	0	0.373901	no
CASGGGGHFSGNTLCF	0	0	1.24289	0	0	0	0	0	0	0	0.373901	no
CASSRTGGGQNTLHF	0.249213	0	0	0	0	0	0	0	0	0	0.373901	no
CAGGVPGTEQF	0	0	0	0.154288	0	0	0	0	0	0	0.373901	no
CASGAAGGNQDPGGSTQYF	0	0	0	0	0	0	2.17723	0	0	0	0.373901	no
CASSPAGSNTEAF	0	0	0	0	0.120294	0	0	0	0	0	0.373901	no
CASSPRGASGNTLYF	0.124606	0	0	0	0	0	0	0	0	0	0.373901	no
CSAGASQDTQYFGPGTRLLYNCEPGSF	0	0	0.690496	0	0	0	0	0	0	0	0.373901	no
CSAERGSSYEQYF	0.623032	0.125119	0	0	0	0	0	0	0	0	0.283211	no
CASRTGGVQDTQYF	0	0	0	0.462865	0	0	0	0	0	0	0.373901	no
CASSQELGENTGQLYF	0	0.250237	0	0	0	0	0	0	0	0	0.373901	no
CASGDATFASEGLF	0	0	0	0	0	0	0	0.132106	0	0	0.373901	no
CSGHTSQSTRCFLSPHCTCSAPGADAEQF	0	0	0	0	0	0	0.128073	0	0	0	0.373901	no
CDSSPGLGGYEQYF	0	0	0	0	0	0.147476	0	0	0	0	0.373901	no
CASSQAGGQGYTEVF	0.124606	0	0	0	0	0	0	0	0	0	0.373901	no
CASGTGGPGNTF	0.249213	0	0	0	0	0	0	0	0	0	0.373901	no
CSASRGRNTSYF	0	0	0	0	0	0	0	0	0	0.124538	0.373901	no
CASSGPTGGAGEQYF	0	0.125119	0	0	0	0	0	0	0	0	0.373901	no
CASSATSAEVF	0	0	0	2.46862	0	0	0	0	0	0	0.373901	no
CAGSQEREDTQYF	0.124606	0	0	0	0	0	0	0	0	0	0.373901	no
CASSDAWGRNYAEHF	0	0	0	0.154288	0	0	0	0	0	0	0.373901	no
CASSDASCRYPHYF	0.124606	0	0	0	0	0	0	0	0	0	0.373901	no
CSANGGECEQYF	0	0	0	0	0	0	0	0	0.122106	0	0.373901	no
CSGGLSYKQYF	0	0	6.07636	0	0	0	0	0	0	0	0.373901	no
CASSQDPSANTEGF	0	0	0	0.308577	0	0	0	0	0	0	0.373901	no
CANSLLGVNTLYF	0.623032	0	0	0	0	0	0	0	0	0	0.373901	no
CASGDASNESLLF	0	0	0.138099	0	0	0	0	0	0	0	0.373901	no
CTSSAGTGTGQLYF	0	0	0.828595	0	0	0	0	0	0	0	0.373901	no
CASSILGDQDTQYF	0.623032	0	0	0	0	0	0	0	0	0	0.373901	no
CAGSLVGRSTEVF	0	2.25213	0	0	0	0	0	0	0	0	0.373901	no
CASSCGGAGGNTDYSF	0	0	0	0.154288	0	0	0	0	0	0	0.373901	no
CASSDAAPNSGNTLYF	0	0	0.138099	0	0	0	0	0	0	0	0.373901	no
CVSSLSSGNTLYF	0.124606	0	0	0	0	0	0	0	0	0	0.373901	no
CSADGEDQF	0	0	0	0	0	0	0.128073	0	0	0	0.373901	no
CASSRESRDQDTQYF	0	0	0	0	0	0.294952	0	0	0	0	0.373901	no
CSAGWGGTAQLYF	0	0.125119	0	0	0	0	0	0	0	0	0.373901	no
CSASQHSYPHHCWHRNIQLSENFSLILELASLSQTAVYFCASSGTEETLYF	0	0	0	0	0.120294	0	0	0	0	0	0.373901	no
CASGVLGGANTEVF	0	0.375356	0	0	0	0	0	0	0	0	0.373901	no
CANSLDGGQDTEVF	0	0	0	0	0.120294	0	0	0	0	0	0.373901	no
CASRQGGGAYAEQF	0	0.250237	0	0	0	0	0	0	0	0	0.373901	no
CSAGGRGYEQYF	0	3.87867	0	0	19.1268	0	0	0	0	0	0.282494	no
CASGDARGQNSGNTLYF	0	0	0	0.154288	0	0	0	0	0	0	0.373901	no
CSAGQSYNNEPASF	0	0	0.276198	0	0	0	0	0	0	0	0.373901	no
CASSLGRSEQYF	0	0	0	0.154288	0	0	0	0	0	0	0.373901	no
CSARSSEQYF	0	0.250237	0	0	0	0	0	0	0	0	0.373901	no
CASSLWYCEPGAGTEVLF	0	0	0	0	0	0	0	0	0	0.622691	0.373901	no
CAWSLGAANTEVFFGRGSEKCESGSF	0	0	0	0.308577	0	0	0	0	0	0	0.373901	no
CASSSVHEQYF	0.747638	0	0	0	0	0	0	0	0	0	0.373901	no
CSADPRNAEVF	0	0	0	0	0	0.147476	0	0	0	0	0.373901	no
CGADRDSNTGQLYF	0	0	0.138099	0	0	0	0	0	0	0	0.373901	no
CSDRNPGNTLYF	1.86909	0	0	0	0	0	0	0	0	0	0.373901	no
CASRINPEVF	0.373819	0	0	0	0	0	0	0	0	0	0.373901	no
CASGTRSQNTLYF	0	0.125119	0	0	0	0	0	24.7039	0	0	0.376084	no
CSADHWNSVNTPYF	0	0	0	0	0.120294	0	0	0	0	0	0.373901	no
CASSQGQDTGQLNF	0	0	0	0	0	0	0.128073	0	0	0	0.373901	no
CASSRDETGVTEVF	0	0	0	0	0.120294	0	0	0	0	0	0.373901	no
CASGLGDRNYAERF	0	0	0	0	0	0	0	0	0.122106	0	0.373901	no
CASSGPGQGPNTEVF	0	0	0	0	0.120294	0	0	0	0	0	0.373901	no
CAGSLKTNSNTEVLF	0	0	0	0	0.721765	0	0	0	0	0	0.373901	no
CASSLTGAQDTLYF	0	0.125119	0	0	0	0	0	0	0	0	0.373901	no
CASSLDTDQDTQYF	0	0	0	0.154288	0	0	0	0	0	0	0.373901	no
CASILPGRNNQAQHF	0	0	0	0	0	0	0.128073	0	0	0	0.373901	no
CASSSQYEQYF	25.4197	0	0	0.308577	0	0	0	0	0	0	0.367446	no
CSACTGVNQAPLF	0	0	0	0	1.08265	0	0	0	0	0	0.373901	no
CAGSDVGAGSYEQYF	1.12146	0	0	0	0	0	0	0	0	0	0.373901	no
CSADGGGDTEVF	0.249213	0	0	0	0	0	0	0	0	0	0.373901	no
CACGTGVYAEQF	0	0	0	0.771442	0	0	0	0	0	0	0.373901	no
CTCSADPKNTEVF	0	0	0	0	0	3.097	0	0	0	0	0.373901	no
CASSQTDWGYEQYF	0	0	0	0	0	0	0	0	0.122106	0	0.373901	no
CASSDAQKDSEVF	0	0	0.966694	0	0	0	0	0	0	0	0.373901	no
CSAGSDSGSGNTLYF	0.124606	0	0	0	0	0	0	0	0	0	0.373901	no
CSARGQGYEQYF	0	0	0	0	4.33059	0	0	0	0	0	0.373901	no
CANMSQGRTLYCTCSDRFSNEGLF	0	0	0	0	0	0	0	0.396319	0	0	0.373901	no
CSAHWGGEAETLYF	0	0	0	0	0	0	0	0	0.122106	0	0.373901	no
CASSDATQQNALYF	0	0.125119	0	0	0	0	0	0	0	0	0.373901	no
CASRGQGRNTLYF	0	0	0	3.54864	0	0	0	0	0	0	0.373901	no
CASSPAHYEQYF	0	0.125119	0	0	0	0	0	0	0	0	0.373901	no
CASRGTINSDYTF	0	0	0	0	0	0.294952	0	0	0	0	0.373901	no
CASSVPGQEETEVF	0.249213	0	0	0	0	0	0	0	0	0	0.373901	no
CASSQDLDWGDERLF	0.249213	0	0	0	0	0	0	0	0	0	0.373901	no
CGGDRISNERLF	0	0	9.25264	0	0	0	0	0	0	0	0.373901	no
CAWPKVLGVLPPLYCTCSADSSGNTLYF	0	0	0	0	0	0	0	0	0.122106	0	0.373901	no
CASSLPGVNQDTPYF	0	0.625593	0	0	0	0	0	0	0	0	0.373901	no
CSAGTPKERLF	0	0.125119	0	0	0	0	0	0	0	0	0.373901	no
CASSQDPRGKDTQYF	0	0.625593	0	0	0	0	0	0	0	0	0.373901	no
CASSTGGDTQVF	0.373819	0	0	0	0	0	0	0	0	0	0.373901	no
CSAAAGGFNQDTLYF	1.37067	0	0	0	0	0	0	0	0	0	0.373901	no
CASSTGGNQAPLF	0.124606	0	0	0	0	0	0	0	0	0	0.373901	no
CSSSQDNGRDTQYF	0	0	0.414297	0	0	0	0	0	0	0	0.373901	no
CAISWDSYAEQF	0	0	0	0	0	0	0	0	0	0.373614	0.373901	no
CASGAQGGNQAPLF	0	2.62749	0	0	0	0	0	0	0	0	0.373901	no
CASSLQDRGSDYTF	0	0	0	0	0.240588	0	0	0	0	0	0.373901	no
CASLESISNERLF	0	0	0	0.308577	0	0	0	0	0	0	0.373901	no
CSATGDEHYF	0	0	0	0	0	0	1.92109	0	0	0	0.373901	no
CSSRLREREQYF	0	0	0.138099	0	0	0	0	0	0	0	0.373901	no
CASSHDRGRNSYEQYF	0.373819	0	0	0	0	0	0	0	0	0	0.373901	no
CASGDAAGGGGGSSQNTLYF	0.124606	0	0	0	0	0	0	0	0	0	0.373901	no
CANSLGDNNSPLYF	0	0	0	0	0.481177	0	0	0	0	0	0.373901	no
CASSQEGDMLYF	0.373819	0	0	0	0	0	0	0	0	0	0.373901	no
CAGSGAGDSPLYF	0	0	0	1.69717	0	0	0	0	0	0	0.373901	no
CAWSHRGTSDYTF	0	0	0	0.771442	0	0	0	0	0	0	0.373901	no
CSARVGEQNTLYF	0	0.125119	0	0	0	0	0	0	0	0	0.373901	no
CASSHDWDSAETLYF	0	0	0	0	0	0.73738	0	0	0	0	0.373901	no
CAWRTPGGGNTQYF	0.124606	0	0	0	0	0	0	0	0	0	0.373901	no
CASSDEGYAQQF	0	0	0.138099	0	0	0	0	0	0	0	0.373901	no
CASSDGRGRSDERLF	0.996851	0	0	0	0	0	0	0	0	0	0.373901	no
CASSPDCTCSADRGANTGQLYF	0.373819	0	0	0	0	0	0	0	0	0	0.373901	no
CPSSQARSQNTLYF	0	0	0	0	0	0	0	0.528425	0	0	0.373901	no
CASSQTTSNQAPLF	0	0	0	0	0	0.294952	0	0	0	0	0.373901	no
CAWSLVVGGGQNTSYF	0	0	0	4.62865	0	0	0	0	0	0	0.373901	no
CASSRDWGGGVEQF	0.124606	0	0	0	0	0	0	0	0	0	0.373901	no
CASGDETGGAAQF	0	0	0	0.154288	0	0	0	0	0	0	0.373901	no
CASGASTGGGQDTQYF	0.249213	0	0	0	0	0	0	0	0	0	0.373901	no
CRTANSDYTF	0.124606	0	0	0	0	0.884856	0	0	0	0	0.441108	no
CTSSLDWDSAETLYF	0	0	0	0	0	2.50709	0	0	0	0	0.373901	no
CASSGARDRDEPYF	0	0	0	0	0	0	0	0	0	0.124538	0.373901	no
CASTEGAGNTLYF	0.124606	0	0	0	0	0	0	0	0	0	0.373901	no
CASSFRDRDSPLYF	0	0	0	0	0	0.294952	0	0	0	0	0.373901	no
CRADRGAAPPF	0	0	0	0	0.120294	0	0	0	0	0	0.373901	no
CASGEGDSSGNTLYF	0	0.375356	0	0	1.08265	0	0	0	0	0	0.238576	no
CASNDVGYKQYF	0	0	0	0	0	0.147476	0	0	0	0	0.373901	no
CASSPGTAPDTQAQHF	0	0.250237	0	0	0	0	0	0	0	0	0.373901	no
CSSSQDKPWRDTQYF	0.124606	0	0	0	0	0	0	0	0	0	0.373901	no
CASGVGASNERSF	0	0	0.552396	0	0	0	0	0	0	0	0.373901	no
CASSQSRDHYAQQF	0	0	0	0.154288	0	0	0	6.3411	0	0	0.384541	no
CASSRQGERLF	0.498425	0	0	0	0	0	0	0	0	0	0.373901	no
CSGRGAGERYF	0	0	0.138099	0	0	0	0	0	0	0	0.373901	no
CASSQARDREDEQYF	0	0	0	0	0	0	0	0.792637	0	0	0.373901	no
CSVEGATKVF	0	0	0	0	0.120294	0	0	0	0	0	0.373901	no
CSENRDVQYF	0	0.125119	0	0	0	0	0	0	0	0	0.373901	no
CASSGDTQAQHFGEGTRLSKMLSLGVPTAGNTLYF	0	0	0	0	0	0	0.256145	0	0	0	0.373901	no
CTSSATGDEPYF	0	0	0	0	0	0	0.128073	0	0	0	0.373901	no
CSSGLGVNYAEQF	0	0	0	0	0	0.147476	0	0	0	0	0.373901	no
CARLGVRNTLYF	0	0	0	0.154288	0	0	0	0	0	0	0.373901	no
CGALGGLAEQLF	0	0	0	0	0	0	0	0.264212	0	0	0.373901	no
CASRPGTSTEVF	0.747638	0	0	0	0	0	0	0	0	0	0.373901	no
CAPPICTCSAVRDSQNTLYF	0	0	0	0	0	0.147476	0	0	0	0	0.373901	no
CSQGQDTRQLYF	0	0	0	0	0	0	0.128073	0	0	0	0.373901	no
CAGSLGGPSYEQCF	0	0	0	0	0	0.147476	0	0	0	0	0.373901	no
CASSKQGATNERLLF	0.498425	0	0	0	0	0	0	0	0	0	0.373901	no
CAGHQNTMYF	0	0	0	1.69717	0	0	0	0	0	0	0.373901	no
CASSLDRNTEVF	0.373819	0.750711	0	0.308577	0.842059	0	2.30531	0	0	0	0.990595	no
CASSDALNCDYTF	0	0	0	0	0	0	0	0	0	0.124538	0.373901	no
CASSDGRGRGPDYTF	0	0	0	0.617154	0	0	0	0	0	0	0.373901	no
CGLTGVNQYF	0	0	0	0	0	0	0	0	0	0.124538	0.373901	no
CSADLRYNSPLF	0.124606	0	0	0	0	0	0	0	0	0	0.373901	no
CASSLDWAGSDYTF	0	0	0	0.308577	0	0	0	0	0	0	0.373901	no
CSGVAVQLF	0	0	0	0.154288	0	0	0	0	0	0	0.373901	no
CASSLEHSAETLHF	0.373819	0	0	0	0	0	0	0	0	0	0.373901	no
CASSNRGRTERLF	0	0.87583	0	0	0	0	0	0	0	0	0.373901	no
CASSFRQGYAEQSF	0	4.50427	0	0	0	0	0	0	0	0	0.373901	no
CASSQGQGYTGQLYF	0.124606	0	0	0	0	0	0	0	0	0	0.373901	no
CASSFQGANSDYSF	0.124606	0	0	0	0	0	0	0	0	0	0.373901	no
CASPPHICTCSPGQSNTEVF	0	0	0.138099	0	0	0	0	0	0	0	0.373901	no
CAWSATDKGREQYF	0	0.500474	0	0	0	0	0	0	0	0	0.373901	no
CASRPGQKNTLYF	0.249213	0	0	0	0	0	0	0	0	0	0.373901	no
CASSQSTGCPSAPPVPYCTCRPGLGVNYAEQF	0	0.125119	0	0	0	0	0	0	0	0	0.373901	no
CASNDMGQNTLYF	0	0	0	0	0	0.442428	0	0	0	0	0.373901	no
CASSAGGGNYAEQSF	1.12146	0	0	0	0	0	0	0	0	0	0.373901	no
CASRELGGDEQCF	0	0	0	0	0	0	0.128073	0	0	0	0.373901	no
CARSNSENTEVF	0	0	0	0	4.09	0	0	0	0	0	0.373901	no
CSETVYNERVF	0	0	0	0	0	0	0	0	0.122106	0	0.373901	no
CASSDADRTNERLF	0	0.125119	0	0	0	0	0	0	0	0	0.373901	no
CAWSSRDRSYSDYTF	0	560.656	0	0	0	0	0	0	0	0	0.373901	no
CASSASGAPYEQYF	0	0.250237	0	0	0	0	0	0	0	0	0.373901	no
CSADQGIGAEQF	0.249213	0	0	0	0	0	0	0	0	0	0.373901	no
CAPRHCTCSAGGENEQYF	0	0	0	0	0	0.147476	0	0	0	0	0.373901	no
CASGEGTHTEVF	0	0.125119	0	0	0	0	0	0	0	0	0.373901	no
CPRSRGSKDAEQF	0	0.125119	0	0	0	0	0	0	0	0	0.373901	no
CASSRPQGWGTEVF	0	0.87583	0	0	0	0	0	0	0	0	0.373901	no
CSAGTGGDEGLF	0	0	0.138099	0	0	0	0	0	0	0	0.373901	no
CASSSRTGGGSDYTF	0	0.125119	0	0	0	0	0	0	0	0	0.373901	no
CSASRGQNSDYTF	0	0	0	0	0	0	0	0	0	0.249076	0.373901	no
CASSQDSVYAEQF	0	0.500474	0	0	0	0	0	0	0	0	0.373901	no
CASSHTEQDNQYF	0	0	0.138099	0	0	0	0	0	0	0	0.373901	no
CASSLGGDSGQLYF	0.373819	0	0	0	0	0	0	0	0	0	0.373901	no
CGSSDAWGGNYAEQF	0	0	0	0.154288	0	0	0	0	0	0	0.373901	no
CASSRRTGAQQF	0.249213	0	0	0	0	0	0	0	0	0	0.373901	no
CASGPRDGGSYEQYF	0	0	3.45248	0	0	0	0	0	0	0	0.373901	no
CASGVPGQGPNPGQLYF	0	0	0	0	0.120294	0	0	0	0	0	0.373901	no
CASGVLGGGAETLSF	0	0.125119	0	0	0	0	0	0	0	0	0.373901	no
CSASRDPVGDQDTQYF	0	0	0	0	0.360882	0	0	0	0	0	0.373901	no
CASSGLVGTEHF	0	0	0	0	0	0	0	0	0	0.124538	0.373901	no
CSARTPNEGLF	0	0	0	0	0	0.147476	0	0	0	0	0.373901	no
CAAEGTGNEGLF	0	0	0	0	0	0.147476	0	0	0	0	0.373901	no
CTSSDDREEQYF	1.86909	0	0	0	0	0	0	0	0	0	0.373901	no
CASGANTVQLHF	0	0	0.138099	0	0	0	0	0	0	0	0.373901	no
CARGGTLGGENTLYF	0	0	0	0	0.962353	0	0	0	0	0	0.373901	no
CASSLGDGNYAEQSF	0	0	0	0	0	0	0	0	0.244212	0	0.373901	no
CSETVSNERLFFGTGNYAEQF	0	0	0	0	0	0	0	0	0.122106	0	0.373901	no
CSTRQGANIEVF	0	0	0	0	0	0	2.56145	0	0	0	0.373901	no
CASSQGPTNTEVF	0	0	0	0	0.360882	0	0	0	0	0	0.373901	no
CASRGQLNTGQPYF	0.124606	0	0	0	0	0	0	0	0	0	0.373901	no
CTSSAEREENSPLYF	0	0	0	0	0	0	2.04916	0	0	0	0.373901	no
CASGDAGGLNYAEQF	0.124606	0	0	0	0	0	0	0	0	0	0.373901	no
CASSHPGQGFNERLLF	0	0	0	0	0	0	0	0.132106	0	0	0.373901	no
CAGSWDSYAEQF	0	0	0	0	0	0	0	0	0	15.1937	0.373901	no
CASRGGYAEQF	0	0	1.65719	0	0	0	0	0	0	0	0.373901	no
CASSWRGEAEQF	0	0.375356	0	0	0	0	0	0	0	0	0.373901	no
CASGLGGEQYF	0	1.87678	0	0	0	0	0	0	0	0	0.373901	no
CSAGRGGRTAPLYF	0	0	0	0	0	0	0.128073	0	0	0	0.373901	no
CASSLGLGGYTF	0	0	0	0.154288	0	0	0	0	0	0	0.373901	no
CAGGEGTGRDTQYF	0	0	0	0	0.120294	0	0	0	0	0	0.373901	no
CASSQEDRAYEPYF	0	0.125119	0	0	0	0	0	0	0	0	0.373901	no
CASSSAYGQYF	0	1.25119	0	0	0	0	0	0	0	0	0.373901	no
CASSRPRDLYAEQF	0	0	0	0	0	0	0	0.132106	0	0	0.373901	no
CASSHLRGAYAEVVF	0	0	0	0	0	0	0	0.132106	0	0	0.373901	no
CSETVSDEGLF	0	0	0	0	0	0	0	0	1.46527	0	0.373901	no
CSARITNERLF	0	0	0	0	0	2.65457	0	0	0	0	0.373901	no
CASSLARVNTEVF	0	0.250237	0	0	0.120294	0	0	0	0	0	0.211063	no
CASSLSSYTEVF	0	0.375356	0	0	0	0	0	0	0	0	0.373901	no
CDSSGTGGAEVF	0	0	0	0.154288	0	0	0	0	0	0	0.373901	no
CSSGTGGARSAEQF	0	0	0	0	0	1.17981	0	0	0	0	0.373901	no
CASSDTKDNQDTQYF	0	0	0	1.08002	0	0	0	0	0	0	0.373901	no
CTGSEDFSQNTLYF	0.498425	0	0	0	0	0	0	0	0	0	0.373901	no
CASSDTHPDYTF	0	0	0	0	0	0	0	0	0.122106	0	0.373901	no
CGASRQGTNGRLF	0.124606	0	0	0	0	0	0	0	0	0	0.373901	no
CARWDNSPHYF	0.124606	0	0	0	0	0	0	0	0	0	0.373901	no
CASSLGTYQDTQYF	0	0.250237	0	0	0	0	0	0	0	0	0.373901	no
CASSHNKSYEQYF	0	0	0	0.154288	0	0	0	0	0	0	0.373901	no
CSAETGNNNQAQHF	0	0.500474	0	0	0	0	0	0	0	0	0.373901	no
CAWSSRLGGNTLYF	0	0.375356	0	0	0	0	0	0	0	0	0.373901	no
CSASGGAYEQYF	0	0	0	0	1.44353	0	0	0	0	0	0.373901	no
CASSQGQGANTEF	0	0	0.276198	0	0	0	0	0	0	0	0.373901	no
CASGGGEGTQYF	0	0	0	0.154288	0	0	0	0	0	0	0.373901	no
CRLWDRGDSDYTF	0	0	0	5.4001	0	0	0	0	0	0	0.373901	no
CASSWDRNTEVIF	0	0.125119	0	0	0	0	0	0	0	0	0.373901	no
CSAGQDNSHLYF	0	0	0.138099	0	0	0	0	0	0	0	0.373901	no
CSAANQDTQYF	0	0	0.690496	13.7317	0	0	0	0	0	0	0.347953	no
CSAPHWGQDTQYFGPGTRLLENSQPGTGTEVLF	0	0	0	0	0	0	0	0	0.122106	0	0.373901	no
CSAHGDTKAPF	0	0	0	0.154288	0	0	0	0	0	0	0.373901	no
CTRSADRGANTEVF	1.49528	0	0	0	0	0	0	0	0	0	0.373901	no
CASSPLGGRLDTQYF	0.124606	0	0	0	0	0	0	0	0	0	0.373901	no
CASSERFSTEVLF	0	0.125119	0	0	0	0	0	0	0	0	0.373901	no
CASGGRKISNDRLLF	0.124606	0	0	0	0	0	0	0	0	0	0.373901	no
CSGQGCYNSPLYF	0	0.250237	0	0	0	0	0	0	0	0	0.373901	no
CSADQTISHERLF	0	0	1.24289	0	0	0	0	0	0	0	0.373901	no
CSARLGWGQHF	0.249213	0	0	0	0	0	0	0	0	0	0.373901	no
CTYSAEEANQDTQYF	0	0	0	0	0	0	0.256145	0	0	0	0.373901	no
CASSDDKTGLSEQF	0	0	0	0	2.16529	0	0	0	0	0	0.373901	no
CTYSAAGNSPLYF	0	0	4.14297	0	0	0	0	0	0	0	0.373901	no
CASSLRYNYAEQCF	0.623032	0	0	0	0	0	0	0	0	0	0.373901	no
CASSDGGVHTGQLYF	0	0	0	0	0	0.442428	0	0	0	0	0.373901	no
CSAGGGAETLCF	0	0.500474	0	0	0	0	0	0	0	0	0.373901	no
CSPVNQDTQYF	0	0	0	0.617154	0	0	0	0	0	0	0.373901	no
CSATGTGDDEQCF	0	1.00095	0	0	0	0	0	0	0	0	0.373901	no
CSLEIQSSEAGDSALHLQTGQNSDYTF	0	0	0	0	0	0.147476	0	0	0	0	0.373901	no
CASSRLGGRQNTLYF	0	0	0	0	0	2.21214	0	0	0	0	0.373901	no
CSAAAIQDAQYF	0.124606	0	0	0	0	0	0	0	0	0	0.373901	no
CASTRQDYNSPLYF	0	0	0	0	0.120294	0	0	0	0	0	0.373901	no
CASSPGQGNAEVLF	0.124606	0	0	0	0	0	0	0	0	0	0.373901	no
CAGSGSGQSNTEVF	0	0	0	0	0	2.50709	0	0	0	0	0.373901	no
CASGDPRAETLYF	0.373819	0.125119	0	0	0	0	0	0	0	0	0.241626	no
CASSDVGGANSDYTF	0	0	0	0	1.56382	0	0	0	0	0	0.373901	no
CASSKRGATNERLF	0.747638	0	0	0	0	0	0	0	0	0	0.373901	no
CASGDAVGSAETLHF	0.623032	0	0	0	0	0	0	0	0	0	0.373901	no
CTRSAEGLGNTGQLYF	2.99055	0	0	0	0	0	0	0	0	0	0.373901	no
CASSHPGQGQDTQNF	0	0.125119	0	0	0	0	0	0	0	0	0.373901	no
CASGDGDSAGNTLYF	0	0.125119	0	0	0.481177	0	0	0	0	0	0.263054	no
CASGDARGGRQNTLYF	0.373819	0	0	0	0	0	0	0	0	0	0.373901	no
CASSLPDSQNTLYF	0	0.500474	0	0	0	0	0	0	0	0	0.373901	no
CASSFRYWGAYEQYF	0.124606	0	0	0	0	0	0	0	0	0	0.373901	no
CASIQDMTGGGNTLYF	0.124606	0	0	0	0	0	0	0	0	0	0.373901	no
CASRRAGPASF	0	0	0	0	0	0	0	0	0.122106	0	0.373901	no
CSADEGSDDSPLYF	0	0	0	0	0	0	0	0	0	0.249076	0.373901	no
CSATGGNYAEQF	0	0	0	0	0	0	3.97025	0	0	0	0.373901	no
CAWKGQGGSDCTF	0	0	0	2.16004	0	0	0	0	0	0	0.373901	no
CSAHGTGKVF	0.124606	0	0	0	0	0	0	0	0	0	0.373901	no
CAIGEGSYEQYF	0.249213	0	0	0	0	0	0	0	0	0	0.373901	no
CASRQGTGKDSDYTF	0.623032	0	0	0	0	0	0	0	0	0	0.373901	no
CSARGQGGEQYF	0	0	0.138099	0	0	0	0	0	0	0	0.373901	no
CSADRNTGQLYF	0	0	0.276198	0	0.962353	0	0	0	0	0	0.254816	no
CASSLHVYEQYF	0	0	0	0	0	0.589904	0	0	0	0	0.373901	no
CASSDWGASNTGQLYF	2.24291	0	0	0	0	0	0	0	0	0	0.373901	no
CASSAWPKVLGVLCPVCASSFGTGGAGSPLYF	0	0	0	0	0.120294	0	0	0	0	0	0.373901	no
CPSSQAGGWEQYF	0	0	0	0	0	0	0	0	0.122106	0	0.373901	no
CANGDRPSNTEVF	0	0.125119	0	0	0	0	0	0	0	0	0.373901	no
CASSNSNTLDAQYF	0	0.125119	0	0	0	0	0	0	0	0	0.373901	no
CSLEIQPSEAGDSALYLYASSPSNTEVF	0	0	0	0	0	0	0	0	0.244212	0	0.373901	no
CASGDPGQGNSGGTLYF	0	0	0	0	0	0	0	0	0	0.747229	0.373901	no
CASSLGYNSPLYF	0	0	0	0.925731	0	0	0	0	0	0	0.373901	no
CVSSSQNTLYF	0	0.625593	0	0	0	0	0	0	0	0	0.373901	no
CTSRDRETERLF	0	0	0	0	0	1.32728	0	0	0	0	0.373901	no
CSAAATANTDDF	0	0	0	0	0	0.147476	0	0	0	0	0.373901	no
CASSVVRDRRKTEVF	0.249213	0	0	0	0	0	0	0	0	0	0.373901	no
CASSLEAGDTGQLYF	0	2.75261	0	0	0	0	0	0	0	0	0.373901	no
CMALSNERVCF	0	0	0	0	0.120294	0	0	0	0	0	0.373901	no
CASSEMTDTVVF	0.249213	0	0	0	0	0	0	0	0	0	0.373901	no
CASSLDRSSYEQF	0	2.0019	0	0	0	0	0	0	0	0	0.373901	no
CASSQVLGVGAETLYF	0	0	0.690496	0	0	0	0	0	0	0	0.373901	no
CSGGGAGAGQLYF	0	0	0.276198	0	0	0	0	0	0	0	0.373901	no
CSADTEF	0	0	0	0	0	0.294952	0	0	0	0	0.373901	no
CASSSGTGGIERYF	0.249213	0	0	0	0	0	0	0	0	0	0.373901	no
CSVGQDNTEVF	0	0.500474	0	0	0	0	0	0	0	0	0.373901	no
CSADANNERGFFVVGICTAGAVTGGKWDTQYF	0	0	0	0.154288	0	0	0	0	0	0	0.373901	no
CASSQDNQDTQSF	0	0	0	0	0.120294	0	0	0	0	0	0.373901	no
CASSDAGEDSDYAF	0	0	0	0.308577	0	0	0	0	0	0	0.373901	no
CASSQNTAFLHYSPVPHCTRSAEGQDTQYF	0	0	0	0	0.120294	0	0	0	0	0	0.373901	no
CASSLGQTYNERLF	0	0	0	0	0.120294	0	0	0	0	0	0.373901	no
CASGDWGADHAEQF	0	0	0	1.85146	0	0	0	0	0	0	0.373901	no
CANSLGQGSYAEQF	0.249213	0	0	0	0	0	0	0	0	0	0.373901	no
CASGDGTGGVLF	0	0	0	0	0	0	0	0	0	0.373614	0.373901	no
CASSFHETNSPLYF	0	0.87583	0	0	0	0	0	0	0	0	0.373901	no
CASSLRCSRSLAPCRHCTCSAPGADAEQF	0	0	0	0	0	0	0.128073	0	0	0	0.373901	no
CGSSLLGQNTGQLYF	0	0	0	0	0.120294	0	0	0	0	0	0.373901	no
CASSQGADILCF	0	0	0	0	0	0	0.128073	0	0	0	0.373901	no
CASSQTGASTEVF	0	0	0	0	0.601471	0	0	0	0	0	0.373901	no
CASRQVDSDYTF	0	0	0.138099	0	0	0	0	0	0	0	0.373901	no
CSSRDRDWGHEQYF	0	0	0.276198	0	0	0	0	0	0	0	0.373901	no
CTSSFPYEQF	0	0	0	0	0	0	0	0	0.122106	0	0.373901	no
CSADRNNSPLYF	0	0	0	0	0	0.442428	0	0	0	0	0.373901	no
CSAHRDRNKEVF	0	0	0	0	0	0	0.128073	0	0	0	0.373901	no
CSASGNEQGRDTEVF	0	0	0	0.154288	0	0	0	0	0	0	0.373901	no
CASSLNHFSNERLF	0	0	0	2.00575	0	0	0	0	0	0	0.373901	no
CSAGQYTEVF	0	0	0.276198	0	0.120294	0	0	0	0	0	0.219071	no
CASNLGGSQNTLYF	0	0.625593	0	0	0	0	0	0	0	0	0.373901	no
CSAARGQETQYF	0	0	0	0	0	0	0	0.132106	0	0	0.373901	no
CDARELGSAETLYF	0	0	0.138099	0	0	0	0	0	0	0	0.373901	no
CSLYIGSAGLEYSTMYLRASSSYRGIGNTLYF	0	0	0	0	0.120294	0	0	0	0	0	0.373901	no
CARGELGNYAEQF	0	0.125119	0	0	0	0	0	0	0	0	0.373901	no
CASSDGRYAEQF	0.249213	0	0	0	0	0	0	0	0	0	0.373901	no
CASSTDQTYEQSF	0	0	0	0.154288	0	0	0	0	0	0	0.373901	no
CASSLPGRNSPLYF	0	0	0	0	0	0	0.128073	0	0	0	0.373901	no
CASSSLGRGNERLF	0.373819	0	0	0	0	0	0	0	0	0	0.373901	no
CSGTGCLGYSLHCTCSADQGGNERLF	0	0	0.138099	0	0	0	0	0	0	0	0.373901	no
CSADRGTELF	0	0.250237	0	0	0	0	0	0	0	0	0.373901	no
CASTGINQDTQYF	0	0	0	0	0	0	0	0.924743	0	0	0.373901	no
CASGDRGTGNTEAF	0	0	0	0	0	0	0	0	0	0.124538	0.373901	no
CSAERGNTELF	0	1.00095	0	0	0	0	0	0	0	0	0.373901	no
CSADPTKTSQNTWYF	0	0	1.38099	0	0	0	0	0	0	0	0.373901	no
CACSAAGTGVAEQF	0	0	0	0	0	0	0	0.264212	0	0	0.373901	no
CARSGLGEGEQYF	0	0	0	0	1.32324	0	0	0	0	0	0.373901	no
CASRDSERIF	0	0	0.138099	0	0	0	0	0	0	0	0.373901	no
CGSRSGTGTEVF	0	0	0	0.308577	0	0	0	0	0	0	0.373901	no
CASSQTGGDTEVFLGWSHISQILYNCESGSF	0	0	0	0	0.360882	0	0	0	0	0	0.373901	no
CASSDQQGKGSDYTF	0.249213	0	0	0	0	0	0	0	0	0	0.373901	no
CASSGTAPGQLYF	0.124606	0	0	0	0	0	0	0	0	0	0.373901	no
CSDWGDTGQLYF	0	0	0.276198	0	0	0	0	0	0	0	0.373901	no
CAPGGANTGQLYF	0	0	0	0	0	0	0	0	22.4675	0	0.373901	no
CASSDAKGGSQNPLYF	0	0	1.24289	0	0	0	0	0	0	0	0.373901	no
CARRTANSDHTF	0	0	0	0	0	0.147476	0	0	0	0	0.373901	no
CASSLGGGASAETLYF	0	0	0	0.617154	0	0	0	0	0	0	0.373901	no
CSALGGLYNYAEQYF	0.249213	0	0	0	0	0	0	0	0	0	0.373901	no
CASSDDWGGGSAETLHF	0	0	0	0	0	0	0	0	0.122106	0	0.373901	no
CASGERQFSQNTQYF	0	0	0	0.154288	0	0	0	0	0	0	0.373901	no
CSASSLELGGHAEQF	0	0	0.138099	0	0	0	0	0	0	0	0.373901	no
CRTGGQEAQHF	0	0	0	0	0	0	0	0	0.122106	0	0.373901	no
CASSLERALNTKVF	0	0	0	0	0	0	0	0	1.22106	0	0.373901	no
CAIGDATFSNERLF	0	0	0	0	0	0	0	0.396319	0	0	0.373901	no
CSARGRGYNSPLYF	0	3.75356	0	0	0	0	0	0	0	0	0.373901	no
CAWSLEAGEQYF	2.86595	0	0	0	0	0	0	0	0	0	0.373901	no
CSAGHWNSGNTLYF	0	0	0	0	15.9991	0	0	0	0	0	0.373901	no
CSSLNRGITEVF	0	0.125119	0	0	0	0	0	0	0	0	0.373901	no
CASGGQRHSYEQYF	0	0	0	0	0.360882	0	0	0	0	0	0.373901	no
CSALRDRNTEVFFGEKKSSFSLTVTSAQKNEMAVFLCASSIPGSNTEVF	0	0	0	0	0	0	0.128073	0	0	0	0.373901	no
CASSGGNTWYF	0	0	0	0.154288	0	0	0	0	0	0	0.373901	no
CASSPTGDVQYF	0.249213	0	0	0	0	0	0	0	0	0	0.373901	no
CANSEGDQDTQYF	0	0	0	0.462865	0	0	0	0	0	0	0.373901	no
CASGDDQDTGQLYF	0	0	0	0.462865	0	0	0	0	0	0	0.373901	no
CTWSADANTEVF	0	0.250237	0	0	0	0	0	0	0	0	0.373901	no
CSADTEVFSGSF	0	0	0	0	0	0.294952	0	0	0	0	0.373901	no
CTAEGATEVF	0	0	0	0	0.240588	0	0	0	0	0	0.373901	no
CASSEGQAHSGQLYF	0	0	0	0	0	0	0	0.132106	0	0	0.373901	no
CASSSGHQDTQYF	0	0	0	0.154288	0	0	0	0	0	0	0.373901	no
CASSFSGGARAETLYF	0	0.375356	0	0	0	0	0	0	0	0	0.373901	no
CTRSGQGSYNSPRYF	0	0.125119	0	0	0	0	0	0	0	0	0.373901	no
CAWSLQGRNEQYF	0	0.87583	0	0	0	0	0	0	0	0	0.373901	no
CSAPHWGQDTQYFGPGTRLLYNNEPASF	0	0	0	0	0	0	0	0	31.1371	0	0.373901	no
CSADPVNTLYFGAGNSPLYF	0	0	0	0	0	0	0.256145	0	0	0	0.373901	no
CSAAGGDTEVSF	0	0	9.52884	0	0	0	0	0	0	0	0.373901	no
CAGSDGQGARAEQLF	0	0.125119	0	0	0	0	0	0	0	0	0.373901	no
CASSSQGAAQDTGQLYF	0	0.125119	0	0	0	0	0	0	0	0	0.373901	no
CASSFSGTVYAEQF	0.124606	0	0	0	0	0	0	0	0	0	0.373901	no
CTRSARDNYAEQF	11.3392	0	0	0	0	0	0	0	0	0	0.373901	no
CASGPTGGSTEVF	1.12146	0	0	0	0	0	0	0	0	0	0.373901	no
CASSSGTGYAEHF	0	0.375356	0	0	0	0	0	0	0	0	0.373901	no
CSAGLGPNERLF	0	0	0	0	0	2.06467	0	0	0	0	0.373901	no
CSATGTSQAPLF	0	0	0	0	0.120294	0	0	0	0	0	0.373901	no
CASSVSNYAEQF	0	0.125119	0	0	0	0	0	0	0	0	0.373901	no
CTRSADPKNTEVF	0	0	0	0	0	9.29099	0	0	0	0	0.373901	no
CASSLSWGQNTLYF	0	0.250237	0	0	0	0	0	0	0	0	0.373901	no
CASSPWDWGYAEQRF	0	0	0	0.154288	0	0	0	0	0	0	0.373901	no
CASSARTASGNALYF	0	0	0	0	0	0	0	0	0.122106	0	0.373901	no
CASPTGRGNTQYF	0.623032	0	0	0	0	0	0	0	0	0	0.373901	no
CASSPGTVSNESLF	0.124606	0	0	0	0	0	0	0	0	0	0.373901	no
CSANAETLYF	0.498425	0	0	0	0	0	0	0	0	0	0.373901	no
CASSPPRANSDYTF	0	0.125119	0	0	0	0	0	0	0	0	0.373901	no
CSADRQWGNSSLYF	0.124606	0	0	0	0	0	0	0	0	0	0.373901	no
CASSSRLRNYGEQF	0	0	0	0	0	0	0.128073	0	0	0	0.373901	no
CASSLNVSNERLF	0	0	0	0	0	0.147476	0	0	0	0	0.373901	no
CQGTDQSGGGTQYF	0	0	0	0	0.120294	0	0	0	0	0	0.373901	no
CSADSYEQF	0	0.625593	0	0	0	0	0	0	0	0	0.373901	no
CASSPWDWGVYEQYF	0	0	0	0.308577	0	0	0	0	0	0	0.373901	no
CASSLSCGCEQYF	0	0	0	0	0	0	0	0	0.122106	0	0.373901	no
CSADRGEGYEQYF	0	0	3.72868	0	0	0	0	0	0	0	0.373901	no
CASSQEDRDNSPLYF	0	0.250237	0	0	0	0	0	0	0	0	0.373901	no
CAGRPGQTNSDYTF	0.996851	0	0	0	0	0	0	0	0	0	0.373901	no
CTSSDADRTNTDVF	0	0.250237	0	0	0	0	0	0	0	0	0.373901	no
CSADKGANSDF	0	0.125119	0	0	0	0	0	0	0	0	0.373901	no
CASGDRQGVAEQF	0.124606	0	0	0	0	0	0	0	0	0	0.373901	no
CSAEGALHF	0	0	0	0	0	0	0	0.132106	0	0	0.373901	no
CSVGQGGSNKRLF	0	0	0	0	0	2.06467	0	0	0	0	0.373901	no
CASSPRLGGLEPYF	0	0.250237	0	0	0	0	0	0	0	0	0.373901	no
CRLRDRGDSDHTF	0	0	0	4.32008	0	0	0	0	0	0	0.373901	no
CASGDAPYEQHF	0	0	1.38099	0	0	0	0	0	0	0	0.373901	no
CTAGATGVGGNTLYF	0	0	0	0	0.240588	0	0	0	0	0	0.373901	no
CASRGTGGAEQF	0	0.250237	0	0	0	0	0	0	0	0	0.373901	no
CRADANSERLF	0	0	0	0.154288	0	0	0	0	0	0	0.373901	no
CASSGAGGAEVF	0	0	0	5.4001	0	0	0	0	0	0	0.373901	no
CSVPWGTSQNTLYF	0	0	0	0	0	0.147476	0	0	0	0	0.373901	no
CASTAGGRAEQF	0	0.125119	0	0	0	0	0	0	0	0	0.373901	no
CSLEVQSSEAGDSALYLYASSLSQTEQF	0	0	0	0	0	0	0	0	0.122106	0	0.373901	no
CAWSLGGLNYAGQF	0.872244	0	0	0	0	0	0	0	0	0	0.373901	no
CANMSQGRTLYCTCSEQGRDTEVF	0	0	0	0.771442	0	0	0	0	0	0	0.373901	no
CASSPQTGGASYEQYF	0	0	0	0	5.41324	0	0	0	0	0	0.373901	no
CASSLKTNSNIAVF	0	0	0	0	0.120294	0	0	0	0	0	0.373901	no
CSSDLGDQDTQYF	0	0	0.138099	0	0	0	0	0	0	0	0.373901	no
CSALGLSSYEQYF	0.249213	0	0	0	0	0	0	0	0	0	0.373901	no
CASSDVGQNNQAQHF	0	0.125119	0	0	0	0	0	0	0	0	0.373901	no
CASGLRTGANTLYF	0	1.12607	0	0	0	0	0	0	0	0	0.373901	no
CTSSPTASAETLYF	0	0	0	0.154288	0	0	0	0	0	0	0.373901	no
CASGDARTGASAETLYF	0.124606	0	0	0	0	0	0	0	0	0	0.373901	no
CASRDTINRDTQYF	0	1.75166	0	0	0	0	0	0	0	0	0.373901	no
CASGGPGQGLDYTF	0.124606	0	0	0	0	0	0	0	0	0	0.373901	no
CASSQSTGCLGPWKHCTCSADNYEQYF	0	0	0	0	0	0	0	0.396319	0	0	0.373901	no
CASGARGGAGDTQYF	0	0.250237	0	0	0	0	0	0	0	0	0.373901	no
CTRSAEGGGFGNTLYF	0	0	0	0	0	33.6245	0	0	0	0	0.373901	no
CASSLSRGAREQYF	0	0.250237	0	0	0	0	0	0	0	0	0.373901	no
CAGSQESRVQDTQYF	0	0	0	0	0	0	0	0	9.40217	0	0.373901	no
CASGTGAGNTLSF	0	0.375356	0	0	0	0	0	0	0	0	0.373901	no
CSGTESADTLYF	0.124606	0	0	0	0	0	0	0	0	0	0.373901	no
CASSLTGTNEGLF	0.747638	0	0	0	0	0	0	0	0	0	0.373901	no
CASHRGRGYEQYF	0	0	0	0.308577	0	0	0	0	0	0	0.373901	no
CAWSATGGIEQYF	0	0.125119	0	0	0	0	0	0	0	0	0.373901	no
CASDDTYEQYF	0	0	0	0	0	1.17981	0	0	0	0	0.373901	no
CASSRDPQGISNERLF	0	0.125119	0	0	0	0	0	0	0	0	0.373901	no
CSGGGTKNTLYF	0	0	0	0	0	0	0.256145	0	0	0	0.373901	no
CSADRLGISRNALYF	0	0	0	0.154288	0	0	0	0	0	0	0.373901	no
CASLWDNAETLYF	0	0	1.10479	0	0	0	0	0	0	0	0.373901	no
CSAIRAAEHVF	0.124606	0	0	0	0	0	0	0	0	0	0.373901	no
CASSASTGRGTEVF	0.124606	0	0	0	0	0	0	0	0	0	0.373901	no
CASSPGGNYAEQEDTQYF	0.373819	0	0	0	0	0	0	0	0	0	0.373901	no
CASIESPHICTCSAAGDSAETLYF	0	0	0	0	0	0	0.128073	0	0	0	0.373901	no
CASSLTRGVAEHF	0	0	0	0	0	0.147476	0	0	0	0	0.373901	no
CASSLGCNYAEQF	0.124606	0	0	0	0	0	0	0	0	0	0.373901	no
CASSLWYYEHYF	0	0	0	0	0	0	0	0	0	13.8237	0.373901	no
CASNPGDWGGQYF	0	0	0	0	0	0	0.51229	0	0	0	0.373901	no
CSETGGQDSQYF	0	0	0	0	0	0.442428	0	0	0	0	0.373901	no
CAWSLHYDSPLYF	0	0.625593	0	0	0	0	0	0	0	0	0.373901	no
CASSSGLGYEQYF	0	1.25119	0	0	0	0	0	0	0	0	0.373901	no
CASIPRDNYAEQF	0	0	0.138099	0	0	0	0	0	0	0	0.373901	no
CAWSQGGGYAEQF	0.124606	0	0	0	0	0	0	0	0	0	0.373901	no
CTCSAERVGEVF	0	0	0	0	0	0.147476	0	0	0	0	0.373901	no
CSATGGAYQQYF	0	0	0	0	0.120294	0	0	0	0	0	0.373901	no
CASSRLGAQDPQYF	0	0	0	0.154288	0	0	0	0	0	0	0.373901	no
CASGADRVHYAEHF	0	0	0	0	0	0	0	0	0.122106	0	0.373901	no
CAGSLGNQDTQYF	0	0.125119	0	0	0	0	0	0	0	0	0.373901	no
CASSLEAIPSYAEQF	0	0	0	0.154288	0	0	0	0	0	0	0.373901	no
CSAPGRLNSYNSPLYF	0.124606	0	0	0	0	0	0	0	0	0	0.373901	no
CSTRNQTPLF	0	0	0	0	0	0	0	0	0	0.124538	0.373901	no
CASSLVGRNQAPLF	2.11831	0	0	0	0	0	0	0	0	0	0.373901	no
CSGPGLGGDYAEQF	0	0	0	0	0	12.8304	0	0	0	0	0.373901	no
CASSPGLGGLAEQF	0	0	0	0	0	0	2.04916	0	0	0	0.373901	no
CASRPTGGNSGNTLYF	0.124606	0	0	0	0	0	0	0	0	0	0.373901	no
CPSGDGTGGVEQYF	0.124606	0	0	0	0	0	0	0	0	0	0.373901	no
CASTPGLGYEQYF	0	0.125119	0	0	0	0	0	0	0	0	0.373901	no
CASSRDCGGTNTGQLYF	0	0.125119	0	0	0	0	0	0	0	0	0.373901	no
CSARGRAEHF	0.124606	0	0	0	0	0	0	0	0	0	0.373901	no
CTYSAGTSNTGQLYF	0	0	3.72868	0	0	0	0	0	0	0	0.373901	no
CANMSQGRTLYCTCGADPVNTLYF	0	0	0	0	0	0	0.128073	0	0	0	0.373901	no
CARRKGGQDTQYF	0	0.125119	0	0	0	0	0	0	0	0	0.373901	no
CSGGRGGDTQYF	0	1.75166	0	0	0	0	0	0	0	0	0.373901	no
CSAADWGHNYAEQF	0	0.125119	0	0	0	0	0	0	0	0	0.373901	no
CASGRNITERLF	0.124606	0	0	0	0	0	0	0	0	0	0.373901	no
CASRTSSNERLF	0	0	0	0.154288	0	0	0	0	0	0	0.373901	no
CASSQTGGRGVF	0	0.750711	0	0	0	0	0	0	0	0	0.373901	no
CVSSQESSYEQYF	0	0	0	0	0	1.62224	0	0	0	0	0.373901	no
CASGDGGVGAETLYF	0	0	0	0	0.120294	0	0	0	0	0	0.373901	no
CASSPTGNAEQF	0	0.125119	0	0	0	0	0	0	0	0	0.373901	no
CSAGALNHDTQYF	0	0	0	0	0	0	0.128073	0	0	0	0.373901	no
CASSLGGTEVFFGKGTRLTVVEEPSAWPKVLGVF	0	0	0	0.154288	0	0	0	0	0	0	0.373901	no
CASSIRGRGTEVF	0	0	0	0	0	0	0	0	0.61053	0	0.373901	no
CASSFRAERSF	0	0.125119	0	0	0	0	0	0	0	0	0.373901	no
CASGDALGWHAEQF	0	0.375356	0	0	0	0	0	0	0	0	0.373901	no
CAGSQAVYEQCF	0	0	0	0	0.120294	0	0	0	0	0	0.373901	no
CASGEGSYEQCF	0.249213	0	0	0	0	0	0	0	0	0	0.373901	no
CANGEGRPDSDYTF	0.124606	0	0	0	0	0	0	0	0	0	0.373901	no
CSAPGQQNTLYF	0	0	0.138099	0	0	0	0	0	0	0	0.373901	no
CASSLTRAGAGQF	0	0	0	0	1.92471	0	0	0	0	0	0.373901	no
CLSRGQNTLYF	0	0.500474	0	0	0	0	0	0	0	0	0.373901	no
CSLEIQSSEAGDSALYLSASSLYRNSDYTF	0.373819	0	0	0	0	0	0	0	0	0	0.373901	no
CSPDQYNAETLYF	0	0	0	0	0	0	0	1.18896	0	0	0.373901	no
CAGSLQGANTEDF	0.124606	0	0	0	0	0	0	0	0	0	0.373901	no
CTSQGTEKTEVF	0	0	0	0	0.120294	0	0	0	0	0	0.373901	no
CSERTGGSYEQYF	0.249213	0	0	0	0	0	0	0	0	0	0.373901	no
CANSVGQGVDERLF	0	0.125119	0	0	0	0	0	0	0	0	0.373901	no
CTRSADSGGNYAEQLF	0	0	0	0	0	0	0.128073	0	0	0	0.373901	no
CASKSTGGALEQYF	1.37067	0	0	0	0	0	0	0	0	0	0.373901	no
CASGDATGGYADQF	0	0	0	0	0	0	0	0	0	0.622691	0.373901	no
CSAGHHNYAEQF	0	0	0	0	1.68412	0	0	0	0	0	0.373901	no
CSLRQFSNERLF	0	0	0	0	0	0	0	7.13373	0	0	0.373901	no
CAWSWTGGSYEHF	0	0	0.138099	0	0	0	0	0	0	0	0.373901	no
CSADDGQANTGQLYF	0	0.375356	0	0	0	0	0	0	0	0	0.373901	no
CASSGTGINSDYNF	0	0	0	0	0	0	0	0	0	0.124538	0.373901	no
CAPCTCSADHWNSGNTLYF	0	0	0	0	0.120294	0	0	0	0	0	0.373901	no
CASSDGGASYEQYF	0	0	0	0.925731	0	0	0	0	0	0	0.373901	no
CASTQGASQNTLYF	0.249213	0	0	0	0	0	0	0	0	0	0.373901	no
CASSQDRDREGGDERLF	0	0	0	0	0	0.147476	0	0	0	0	0.373901	no
CTGSAGGKTEVF	0	0	0.138099	0	0	0	0	0	0	0	0.373901	no
CASSSQGFYVEQF	0.249213	0	0	0	0	0	0	0	0	0	0.373901	no
CASDAGGVYAEQF	0	0	0	0	0	0	0	0	0.122106	0	0.373901	no
CSEDGGGQNTEVF	0.498425	0	0	0	0	0	0	0	0	0	0.373901	no
CSSTGTGGGQNALYF	0	0	0	0	0	0	179.045	0	0	0	0.373901	no
CSAVDGGDYEQYF	0	0	0.138099	0	0	0	0	0	0	0	0.373901	no
CSADRDWGAWLAVQF	0	0	0	0	0	0.589904	0	0	0	0	0.373901	no
CASGDAGGGGAETLCF	0	0	0	0.154288	0	0	0	0	0	0	0.373901	no
CASSDPREGNTEGCF	0	0	0.138099	0	0	0	0	0	0	0	0.373901	no
CRVSRGVTEVF	0	0	0	0	3.24794	0	0	0	0	0	0.373901	no
CASSDGYRNTGVF	0.249213	0	0	0	0	0	0	0	0	0	0.373901	no
CASSPPGQGNTLYF	0	0.125119	0	0	0	0	0	0	0	0	0.373901	no
CASSPDNTYAQYF	0	0	0	0.154288	0	0	0	0	0	0	0.373901	no
CAWSQGTADDTQYF	0	0	0	0	0	0	0	0.132106	0	0	0.373901	no
CASGDSGTGNCDYTF	0.124606	0	0	0	0	0	0	0	0	0	0.373901	no
CSEDGGGQNTWYF	0.872244	0	0	0	0	0	0	0	0	0	0.373901	no
CASSVDRGWRANSDYTF	2.61673	0	0	0	0	0	0	0	0	0	0.373901	no
CSRVQNTLYF	0	0	0	0	0	0	0	0	0.854743	0	0.373901	no
CASGPTENTLYF	0	0	2.48578	0	0	0	0	0	0	0	0.373901	no
CASSPSANTGVF	0	13.5128	0	0	0	0	0	0	0	0	0.373901	no
CASSLTGNSPLHF	0	0	0.966694	0	0	0	0	0	0	0	0.373901	no
CSASGPLGGRTAEQF	0	0.250237	0	0	0	0	0	0	0	0	0.373901	no
CSATGLHPAPLF	0	0	0	0	0.360882	0	0	0	0	0	0.373901	no
CAWRQGAPGNALYF	0	0.500474	0	0	0	0	0	0	0	0	0.373901	no
CSATGTDTNTEVF	0	0	0	0	0	0.147476	0	0	0	0	0.373901	no
CASSLGGAGNQTPLF	0.498425	0	0	0	0	0	0	0	0	0	0.373901	no
CSADWGGAADSAVYFCASSLAPASDYTF	0	0	0	0	0	0	0	0	0.122106	0	0.373901	no
CASRGLGDSYEQYF	0	0.125119	0	0	0	0	0	0	0	0	0.373901	no
CASSQDGTANSDYTFGSGTRQLYF	0	0	0.276198	0	0	0	0	0	0	0	0.373901	no
CRTGGQNTLYF	0	0	0	0	0	0	0	0	0.366318	0	0.373901	no
CSADRAGGADKLYF	0	0	0	0	0	0.147476	0	0	0	0	0.373901	no
CAGSVGSQNTLYF	2.24291	0	0	0	0	0	0	0	0	0	0.373901	no
CSACAGVNTLYF	0	0	0	0	0	0	0	0	0	0.124538	0.373901	no
CSAWSEGEQYF	0	0	0	0	0	0	0.128073	0	0	0	0.373901	no
CTRSGGTGGPGQLYF	0	0	0	0	0	0	45.4658	0	0	0	0.373901	no
CASGDAVGTANSDYTF	0	0	0	0	0	0.147476	0	0	0	0	0.373901	no
CASREGTGQNTLYF	0.373819	0	0	0	0	0	0	0	0	0	0.373901	no
CSGTAGDNYAEQF	0	0	0	0	0.240588	0	0	0	0	0	0.373901	no
CASSQERLGGGQNTLYF	0	0	0	0	0	0	0	0.132106	0	0	0.373901	no
CSAEGEKSKNTLYF	0	0	0.414297	0	0	0	0	0	0	0	0.373901	no
CSVGQIIYEQYF	0	1.00095	0	0	0	0	0	0	0	0	0.373901	no
CSASWGREDTQYF	0	0.87583	0	0	0	0	0	0	0	0	0.373901	no
CASSPDRAHERLF	0.124606	0	0	0	0	0	0	0	0	0	0.373901	no
CSALGGSSTGQLYF	0	0	0.138099	0	0	0	0	0	0	0	0.373901	no
CRSGQNYAGQF	0	0	0	0	0	0	0	0.264212	0	0	0.373901	no
CASSLLGYTWQLYF	0	0	0	0.617154	0	0	0	0	0	0	0.373901	no
CSANARDTLYF	0	0	0	0	0	0	6.01941	0	0	0	0.373901	no
CVSSGLGWTEQF	0	0	0	0	0	0	0	0	0	0.124538	0.373901	no
CASSRTINQDTQSF	0	0	0	0	0	0	0	0	0	1.49446	0.373901	no
CASNSDWGFNQDTQCF	0	0	0	0	0	0	0.128073	0	0	0	0.373901	no
CASGDSGGTRSSYEQYF	0	0	0.138099	0	0	0	0	0	0	0	0.373901	no
CSARPGGNSPLF	0	0	0	0	0.120294	0	0	0	0	0	0.373901	no
CASVDALTGTGNTLYF	0.124606	0	0	0	0	0	0	0	0	0	0.373901	no
CASSDGVGTEVF	0	0	0.138099	0	0	0	0	0	0	0	0.373901	no
CASSRDSSNETLYF	0	0	0	0.154288	0	0	0	0	0	0	0.373901	no
CNADRAGGDERLF	0	0	1.65719	0	0	0	0	0	0	0	0.373901	no
CASGGTGAVSAETLYF	0.124606	0	0	0	0	0	0	0	0	0	0.373901	no
CSAEGQNSDYTEVF	0	0	0	0	0	0.442428	0	0	0	0	0.373901	no
CASSQDPTIRQNTLYF	0	0	0	0	0.120294	0	0	0	0	0	0.373901	no
CASSGTGAQDTQYF	0	0	0	0.154288	0	0	0	0	0	0	0.373901	no
CSLEIQSVWFLSQNTAFLHYSQSRHCTCSADKGEVF	0	0.125119	0	0	0	0	0	0	0	0	0.373901	no
CSPSPGGGAETLYF	0	0	0	0	0	0	0	0.132106	0	0	0.373901	no
CASSPTGVSYEQYF	0	0	0	0	0.120294	0	0	0	0	0	0.373901	no
CASSDAQVNTEVF	0	0.125119	0	0	0	0	0	0	0	0	0.373901	no
CASRGDRGTEVF	0.249213	0	0	0	0	0	0	0	0	0	0.373901	no
CASSDRANYAEQF	0.249213	0	0	0	0	0	0	0	0	0	0.373901	no
CASSGGQGANYTVLHCTCSASRGQDTQYF	0	0	0	0	0	0	0	0.132106	0	0	0.373901	no
CASGDAEQGVANTEVF	0.498425	0	0	0	0	0	0	0	0	0	0.373901	no
CANSLEAIPSYEQYF	0	0	0	0.308577	0	0	0	0	0	0	0.373901	no
CASGLAGQGAAEVF	0.373819	0	0	0	0	0	0	0	0	0	0.373901	no
CASSQGQGQVF	0	0	0	0	0.120294	0	0.51229	0.660531	4592.29	0.249076	0.373746	no
CSDAGANSPLYF	0	0	0	0	0	1.17981	0	0	0	0	0.373901	no
CTWSAVGLGGGAEQF	0	0.125119	0.276198	0	0	0	0	0	0	0	0.215833	no
CASSLGPAHTEVF	0.124606	0	0	0	0	0	0	0	0	0	0.373901	no
CASSSGTGAYAEQF	0.249213	0	0	0	0	0	0	0	0	0	0.373901	no
CASSDMGGTEQF	0	0	0	0	0	0	0	0	0.976849	0	0.373901	no
CAGSFPGGAETLYF	0	0.125119	0	0	0	0	0	0	0	0	0.373901	no
CSADGINTEVF	0	0	0	1.54288	0	0	0	0	0	0	0.373901	no
CASGIGVNYAEQF	0	0	0	0	0	0	0	0.132106	0	0	0.373901	no
CASSRLGGGQYF	0	0	0	3.08577	0	0	0	0	0	0	0.373901	no
CASGEAGQISNERLF	0	0	0	0.308577	0	0	0	0	0	0	0.373901	no
CASRLGDIFSNERF	0	0	0	0	0	0.147476	0	0	0	0	0.373901	no
CVVPCTCSAGQYNSPLYF	0	0	0.138099	0	0	0	0	0	0	0	0.373901	no
CSWTGGAGEQYF	0	0.125119	0	0	0	0	0	0	0	0	0.373901	no
CASRPTGGVTEVF	0	0	0	0	0	0.147476	0	0	0	0	0.373901	no
CASSLGVDEQYF	0	0	0	0.154288	0	0	0	0	0	0	0.373901	no
CASSDINGRLF	0	0	0	2.00575	0	0	0	0	0	0	0.373901	no
CASSQECWGAETLYF	0	626.969	0	0	0	0	0	0	0	0	0.373901	no
CSAAGAAKETLYF	0	0.125119	0	0	0	0	0	0	0	0	0.373901	no
CASSLVTNYAEQF	0	0.125119	0	0	0	0	0	0	0	0	0.373901	no
CANMSQGRTLYSTCRGPDYTF	0	0	0	0	0.120294	0	0	0	0	0	0.373901	no
CSAGQSNTAVF	0	0	0.552396	0	0	0	0	0	0	0	0.373901	no
CASSDGWTGGNSDYTFGSGTDANTEVF	0	0	0	0.154288	0	0	0	0	0	0	0.373901	no
CASGDTNERLF	3.9874	0	0	0	0	0	0	0	0	0	0.373901	no
CAWSQGRTLYCTCSADYNSYNSPLYF	0	0	0	0	0	0	0.256145	0	0	0	0.373901	no
CASGDATGGHTGQLYF	0.124606	0	0	0	0	0	0	0	0	0	0.373901	no
CASGPGRDGNTLYF	0	0	0	0	0	0	0	0	0.122106	0	0.373901	no
CSADWGGEEQYF	0	0	0	0	0	0	0	0	1.83159	0	0.373901	no
CATRAECTEVF	0	0	0	0	0	0.294952	0	0	0	0	0.373901	no
CASSAWDKEVSF	0	0	0	0	0	0	0	0.132106	0	0	0.373901	no
CASSLRDDGNAEVF	0	0	0	0.154288	0	0	0	0	0	0	0.373901	no
CASGGEYEQDRSTATPLHCTCSLGGSNTGQLYF	0	0	0.138099	0	0	0	0	0	0	0	0.373901	no
CSAIESAETLYF	0	0.250237	0	0	0	0	0	0	0	0	0.373901	no
CASGQALDQDTQYF	0	0.250237	0	0	0	0	0	0	0	0	0.373901	no
CSAHRDEQYF	0	0.125119	0	0	0	0	0	0	0	0	0.373901	no
CASRGQGDSDNTF	0	0.125119	0	0	0	0	0	0	0	0	0.373901	no
CSAGGGNTGVF	0	0	0	0.154288	0	0	0	0	0	0	0.373901	no
CASSQGTGGANERLF	0	0.250237	0	0	0	0	0	0	0	0	0.373901	no
CSSRKDTQYSGPGTRLLYNCESGSF	0	0	0	0	0	0.147476	0	0	0	0	0.373901	no
CSAGGRAPLF	0.249213	0	0	0	0	0	0	0	0	0	0.373901	no
CASRGTSAEPLYF	0	0	0	0	0	0.294952	0	0	0	0	0.373901	no
CASGGWENDLSLGF	0.124606	0	0	0	0	0	0	0	0	0	0.373901	no
CASSPTGVTEVF	0	0.250237	0	0	1.56382	0	0	0	0	0	0.298823	no
CASSCTGASAETLYF	0	0	0	0.462865	0	0	0	0	0	0	0.373901	no
CASRDSSNTLYF	0.124606	0	0	0	0	0	0	0	0	0	0.373901	no
CASGGTNSGNTF	1.12146	0	0	0	0	0	0	0	0	0	0.373901	no
CSVGGDSPLYF	0	0	0	0	0	0	8.32472	0	0	0	0.373901	no
CASGQQNSDCTF	0.872244	0	0	0	0	0	0	0	0	0	0.373901	no
CTRRRQGASYNAPLYF	0	0	0.138099	0	0	0	0	0	0	0	0.373901	no
CASSRDPGGSPQYF	0	0	0	0	0	0	0.128073	0	0	0	0.373901	no
CASSLWGANTEVF	0.373819	0	0	0	0	0	0	0	0	0	0.373901	no
CASSPGDWRERYF	0	0	0	0	0	0	0.128073	0	0	0	0.373901	no
CASSLALRWGSAETLDF	0	0.125119	0	0	0	0	0	0	0	0	0.373901	no
CASGRDRGRASPLYF	0	0	0	0	0	0.147476	0	0	0	0	0.373901	no
CASSCGSDPGQNYAEQF	0	0	0	0.154288	0	0	0	0	0	0	0.373901	no
CSEDSGNTLSF	0	0.125119	0	0	0	0	0	0	0	0	0.373901	no
CSSRELYSNERLF	0	0	0	0	0	0	0	0.132106	0	0	0.373901	no
CTRSADRNSGNPLYF	0	0	0	0	0	0.147476	0	0	0	0	0.373901	no
CASSRGGTEVF	0	0	0	0	0	0.442428	0	0	0	0	0.373901	no
CASSPAGKADNSPLYF	0	0	0.138099	0	0	0	0	0	0	0	0.373901	no
CASSLTKNSNTEVF	0	0	0	0	0.120294	0	0	0	0	0	0.373901	no
CASSPAGGAYEQYF	0	0	0	0	0.120294	0	0	0	0	0	0.373901	no
CASSATGQAEQF	0.124606	0	0	0	0	0	0	0	0	0	0.373901	no
CASRGQDCTEQF	0	0	0	0	0	0	0.128073	0	0	0	0.373901	no
CSAGGRAEKF	0.249213	0	0	0	0	0	0	0	0	0	0.373901	no
CASGAAVGNQDTQYF	0	0	0	0	0	0	2.04916	0	0	0	0.373901	no
CAGSPGPSSAETLYF	0	2.12702	0	0	0	0	0	0	0	0	0.373901	no
CASSWGRERSDYTF	0.124606	0	0	0	0	0	0	0	0	0	0.373901	no
CSGGQTNTGRLYF	0	0	0	0	0	0	0	0.132106	0	0	0.373901	no
CASSPYWGNYGEQSF	0	0	0	0	0	0	0	0	0.122106	0	0.373901	no
CASSRYWGANYAEQF	0	0.125119	0	0	0	0	0	0	0	0	0.373901	no
CSAGQTGTGVYEQYF	0	0	0	0.154288	0	0	0	0	0	0	0.373901	no
CASSRTASAETLYF	161.864	0	0	1.85146	0	0	0	0	0	0.124538	0.368142	no
CSAGRGAETLYF	0	1.00095	0	0	0	0	0	0	0	0	0.373901	no
CASSTGDNQAQHF	0	2.75261	0	0	0	0	0	0	0	0	0.373901	no
CASSHRGNQAPLF	0.124606	0	0	0	0	0	0	0	0	0	0.373901	no
CGAGGQKNARLF	0	0	0	0	0	0.147476	0	0	0	0	0.373901	no
CASSGQTSDYTF	0	0	1.24289	0	0	0	0	0	0	0	0.373901	no
CASGASGKKDTQYF	0	0	0	0.154288	0	0	0	0	0	0	0.373901	no
CASSAGLGQETLYF	0	0	0	2.6229	0	0	0	0	0	0	0.373901	no
CASSPHRDRGNAEQF	0	3.12796	0	0	0	0	0	0	0	0	0.373901	no
CASRGQGASAETLYF	0.249213	0	0	0	0	0	0	0	0	0	0.373901	no
CSVGQGGYNNQAPLF	0	0	0	0	0	0.294952	0	0	0	0	0.373901	no
CSLRDWGAETLYF	0	0	0	0	0	0.147476	0	0	0	0	0.373901	no
CASSDRGGGQNALYF	2.61673	0	0	0	0	0	0	0	0	0	0.373901	no
CASSQGGTGCLAPSAGHCTCSETVSTERLF	0	0	0	0	0	0	0	0	0.122106	0	0.373901	no
CASSRDWGGTNTDYTF	0	0.375356	0	0	0	0	0	0	0	0	0.373901	no
CARSQGQTNSDYTF	0	0	0	0	1.92471	0	0	0	0	0	0.373901	no
CARSGKTNTEVF	0	0	0	0	0	0.147476	0	0	0	0	0.373901	no
CASNRDWGSYEQYF	0	1.00095	0	0	0	0	0	0	0	0	0.373901	no
CASNVGQGYAEQF	0	0.125119	0	0	0	0	0	0	0	0	0.373901	no
CASGPTTNTGQLYFGEGSALYLCASSLEGSSYEQYF	0	0	0	0	0	0	0	0	0.122106	0	0.373901	no
CASSLPGRDGQAQHF	0	0	0	0	0	0	0.128073	0	0	0	0.373901	no
CGATGIHQAPLF	0	0	0	0	1.44353	0	0	0	0	0	0.373901	no
CASGDQNRDNQDTQYF	1.24606	0	0	0	0	0	0	0	0	0	0.373901	no
CASSPDWEEQSF	0	0	0	0	0	0.147476	0	0	0	0	0.373901	no
CASGPGENYAEQF	0.124606	0	0	0	0	0	0	0	0	0	0.373901	no
CARSRDWGSYEQYF	0	0.125119	0	0	0	0	0	0	0	0	0.373901	no
CRPGQESFSLILELATPSQTSVYFYASGGRDSSYEQYF	0.124606	0	0	0	0	0	0	0	0	0	0.373901	no
CSTGHAYTF	0	0	0	0	0	0	0	0.132106	0	0	0.373901	no
CASSDTQGAREQYF	0.124606	0	0	0	0	0	0	0	0	0	0.373901	no
CASSLGAYEAGDSALYLCASSGDTQAQHF	0	0	0	0	0	0	0.128073	0	0	0	0.373901	no
CASSDWGGYAAQF	0	0.125119	0	0	0	0	0	0	0	0	0.373901	no
CANGDYRDTEVF	0	0	0	0.154288	0	0	0	0	0	0	0.373901	no
CASSDSSNTGQLYF	1.74449	0	0	0	0	0	0	0	0	0	0.373901	no
CASSQDLANTEVFFGKGRLLPPCMDCRCSADYNSYNSPLYF	0	0	0	0	0	0	0.128073	0	0	0	0.373901	no
CGAEREENSPLYF	0	0	0	0	0	0	10.3739	0	0	0	0.373901	no
CASGGQGNPPLYF	0	0	0	0	0	3.24447	0	0	0	0	0.373901	no
CAWSLRDNTAQLYF	0	0	0	0	0	0	0.896508	0	0	0	0.373901	no
CASSPTGCLGPVLHCTCSADGSDYTF	0	0	0	0	0	0.147476	0	0	0	0	0.373901	no
CSLEIQSSEAGDSALYLRASSLRYNNAEQF	0.124606	0	0	0	0	0	0	0	0	0	0.373901	no
CASSLVVTGSVDTHYLHCRCSASGQENTEVF	0.124606	0	0	0	0	0	0	0	0	0	0.373901	no
CASQDQNTEVF	0	0	0	0	0	0	0	0.660531	0	0	0.373901	no
CASSQDTWGSAETLYF	0.124606	0	0.276198	0	0	0	0	0	2995.63	0	0.373958	no
CSADQGEETLYF	0	0	0	0	0	0	0	1.71738	0	0	0.373901	no
CVWSLAGGLQDTQYF	0	0	1.65719	0	0	0	0	0	0	0	0.373901	no
CASRLGYEQHF	0	0.375356	0	0	0	0	0	0	0	0	0.373901	no
CASGGARGDYAEQF	0.124606	0.250237	0	0	0	0	0	0	0	0	0.208316	no
CASSFGTAYEQYF	0.124606	0	0	0	0	0	0	0	0	0	0.373901	no
CTCSADFGRNTGQLYF	0	0	0	0	0	0	0	4.2274	0	0	0.373901	no
CSADRTSNERLF	1095.04	0	0	0	0	0.147476	0	0	0	0	0.373959	no
CASGEGTGVQDTQYF	0.124606	0	0	0	0	0	0	0	0	0	0.373901	no
CASSNTGRHERLF	0	0.125119	0	0	0	0	0	0	0	0	0.373901	no
CASTGTRNTEVF	0	0.125119	0	0	0	0	0	0	0	0	0.373901	no
CASSDDAQTLYF	0	0.125119	0	0	0	0	0	0	0	0	0.373901	no
CASRGQPNERLF	0	115.359	0	0	0	0	0	0	0	0	0.373901	no
CSAGLGEHTTVYF	0	0.125119	0	0	0	0	0	0	0	0	0.373901	no
CAYSLAGDAEQF	0	0.125119	0	0	0	0	0	0	0	0	0.373901	no
CSASSQDGTGVDTQYF	0	0	0	0	0	0	0	0	0.122106	0	0.373901	no
CASPTAPNSDYTF	0	0	0	0	0	0	0	0.396319	0	0	0.373901	no
CTSSQGLGGDAEQF	0	0	2.62388	0	0	0	0	0	0	0	0.373901	no
CASRGQSSYERLF	0.124606	0	0	0	0	0	0	0	0	0	0.373901	no
CVSSRDYAEQF	0	0	0	0	4.81177	0	0	0	0	0	0.373901	no
CTRSADGGQGGQNALYF	0	0.125119	0	0	0	0	0	0	0	0	0.373901	no
CASAPRDWGGGDTQYFGPGNERLF	0	0	0	0.154288	0	0	0	0	0	0	0.373901	no
CSSSADQKRQNTLYF	0	0	0.138099	0	0	0	0	0	0	0	0.373901	no
CASGESGETLYF	0	0	2.90008	0	0	0	0	0	0	0	0.373901	no
CASSRDYAEPF	0	0	0	0	1.32324	0	0	0	0	0	0.373901	no
CSSSLKTNSNAEVF	0	0	0	0	0.120294	0	0	0	0	0	0.373901	no
CASSLAAGGTGRNTLYF	0	0	0	0	0	0	0	0	0.122106	0	0.373901	no
CASSDGASGDDRDRDYAEQF	0.124606	0	0	0	0	0	0	0	0	0	0.373901	no
CGSDDSGAETLYF	0	0	0	0.617154	0	0	0	0	0	0	0.373901	no
CASSGRNNQAQHF	0	1.62654	0	0	0	0	0	0	0	0	0.373901	no
CASRTGDRAETLYF	0	0	0	0	0	0	0.128073	0	0	0	0.373901	no
CSAQGAGQLYF	0	0	0.690496	0	0	0	0	0	0	0	0.373901	no
CASSLTDHAEQF	0	0.250237	0	0	0	0	0	0	0	0	0.373901	no
CASSGGGWAAEQF	0.249213	0	0	0	0	0	0	0	0	0	0.373901	no
CASSPDSGTGQIYF	0.373819	0	0	0	0	0	0	0	0	0	0.373901	no
CASSQDGGVLPPQPRTAGAVQGSALANMSEGSTLYCTCSPGLGGQDTQYF	0	0	0	0	0.120294	0	0	0	0	0	0.373901	no
CASSPDWGNYAGQF	0	0.87583	0	0	0	0	0	0	0	0	0.373901	no
CSADRTGDNERVF	0.249213	0	0	0	0	0	0	0	0	0	0.373901	no
CASSQAVNEDTQYF	0	0	0.414297	0	0	0	0	0	0	0	0.373901	no
CANSLGGDTEVF	0.124606	0	0	0	0	0	0	0	0	0	0.373901	no
CSASSLGDIFSDERLF	0	0	0	0	0	0.147476	0	0	0	0	0.373901	no
CSGGQGWGNTLYF	0	0.125119	0	0	0	0	0	0	0	0	0.373901	no
CVSSDQNTEVF	0	0.625593	0	0	0	0.442428	0	0	0	0	0.817731	no
CASSLRWGQDTQYF	0	4.25403	0	0	0	0	0	0	0	0	0.373901	no
CSASQSNYAVQF	0	0	0	0	0.962353	0	0	0	0	0	0.373901	no
CSAGQREQNTLYF	0	0.125119	0	0	0	0	0	0	0	0	0.373901	no
CASSLPGTGDQTPLF	0.124606	0	0	0	0	0	0	0	0	0	0.373901	no
CASSGTGGSSDYTF	0.124606	1.50142	0	0	0	0	0	0	0	0	0.33222	no
CASGDALGLGDNHDTQYF	0	0	0	0.308577	0	0	0	0	0	0	0.373901	no
CANVSQGRTLYCTCSARTGGVNYAEQF	0	0	0.276198	0	0	0	0	0	0	0	0.373901	no
CASSDLGCEHERLF	0	0	0	0	0	0.147476	0	0	0	0	0.373901	no
CASGDRGQLHNSPLYF	0.498425	0	0	0	0	0	0	0	0	0	0.373901	no
CASSQDGTPDTQYF	2.86595	0	0	0	0	0	0	0	0	0	0.373901	no
CRGDNSQDALYF	0	0	0	0	0.240588	0	0	0	0	0	0.373901	no
CASSAGTENTEVLF	0	0.375356	0	0	0	0	0	0	0	0	0.373901	no
CASSQDTRNTGQLYF	0	0	0	0	0	0	0	0	0.61053	0	0.373901	no
CARTKVQGVLPSLICTCSAEYAEQF	0	0	0.138099	0	0	0	0	0	0	0	0.373901	no
CANGAAGGNQDTQYF	0	0	0	0	0	0	14.8564	0	0	0	0.373901	no
CASSRDRADEQYF	0.124606	0.125119	0	0	0	0	0	0	0	0	0.177809	no
CSADQGMEQSF	0.373819	0	0	0	0	0	0	0	0	0	0.373901	no
CGPGQNYVEQF	0	0	0	0	0	0	0	0.132106	0	0	0.373901	no
CSGDWGNYEQYF	0.249213	0	0	0	0	0	0	0	0	0	0.373901	no
CASEGQNTEVF	0.623032	0	0	0	0	0	0	0	0	0	0.373901	no
CASGDRTNSGNTLCF	0.872244	0	0	0	0	0	0	0	0	0	0.373901	no
CSATGTGYQNTLYF	0	0	0.138099	0	0	0	0	0	0	0	0.373901	no
CASSDPGQQDTQYF	0	213.327	0	0	0	0	0	0	0	0	0.373901	no
CSARRDRNTEDF	0	0	0	0	0	0	0.128073	0	0	0	0.373901	no
CANSDAWGGNYAEQF	0	0	0	0.617154	0	0	0	0	0	0	0.373901	no
CVSSQDADWACAEQF	0	0	0	0	0	0	0	0.132106	0	0	0.373901	no
CASGSTVHQPCLHCTCSADGGRAEQF	0	0	0.138099	0	0	0	0	0	0	0	0.373901	no
CSSGDSGHSGNTLYF	0.124606	0	0	0	0	0	0	0	0	0	0.373901	no
CYLWAWSLRTEVF	0	0	0	0	0	0.147476	0	0	0	0	0.373901	no
CSTTGQGAPEVF	0	0	0	0.154288	0	0	0	0	0	0	0.373901	no
CSAETGGPSAETLYF	0.124606	0	0	0	0	0	0	0	0	0	0.373901	no
CRKQDALYF	0	0	0	0	0	0.147476	0	0	0	0	0.373901	no
CASSEGTVGEQSF	0	0	0	0.154288	0	0	0	0	0	0	0.373901	no
CSADMGMEQYF	0.124606	0	0	0	0	0	0	0	0	0	0.373901	no
CAFRAEGQDTQYF	0.124606	0	0	0	0	0	0	0	0	0	0.373901	no
CASSDDWGANSDYTF	0	0	0	0	0	0	0	0	1.58738	0	0.373901	no
CSSGDCAQYF	0	0	0.828595	0	0	0	0	0	0	0	0.373901	no
CASSPDRARAEQF	0.249213	0	0	0	0	0	0	0	0	0	0.373901	no
CASGVSGTGRDTLYF	0	0	0	0.308577	0	0	0	0	0	0	0.373901	no
CASSTYTGQLYF	116.382	0	0	0	0	0	0	0	0	0	0.373901	no
CSDAHRSSYEQF	0	0.125119	0	0	0	0	0	0	0	0	0.373901	no
CAISDGTGSGNTLYF	0.124606	0	0	0	0	0	0	0	0	0	0.373901	no
CSADVLGAGEQYF	0.124606	0	0	0	0	0	0	0	0	0	0.373901	no
CSADRGRNYAEQF	0	0	0.276198	0	0	0	0	0	0	0	0.373901	no
CSTPGQGAPDIF	0	0	0	0.154288	0	0	0	0	0	0	0.373901	no
CASSDAQGRDEGLF	0	0	0.138099	0	0	0	0	0	0	0	0.373901	no
CSVGRAGDTQYF	0	0.125119	0	0	0	0	0	0	0	0	0.373901	no
CASSGGPGANSPLSF	0	0	0	0	0	0	0	0.132106	0	0	0.373901	no
CSARDRVRDEQYF	0	0.250237	0	0	0	0	0	0	0	0	0.373901	no
CASSPGGPEAVF	0	0.125119	0	0	0	0	0	0	0	0	0.373901	no
CASSFPSSAGTLYF	0	0.750711	0	0	0	0	0	0	0	0	0.373901	no
CTSSGESSDYTF	0.124606	0	0	0	0	0	0	0	0	0	0.373901	no
CASSQDGGVLVPYCTCSVGRGNSAETLYF	0	0	0	0	0.120294	0	0	0	0	0	0.373901	no
CSVELRYNSPLYF	0.124606	0	0	0	0	0	0	0	0	0	0.373901	no
CSARGTGVNSGNTLYF	0	0	0	0.154288	0	0	0	0	0	0	0.373901	no
CARGEISNERLFFGHGNFAPGTEIGGCVSSPGTGNTEVF	0	0	0	0	0	0	0	0.396319	0	0	0.373901	no
CASRGSSYKQYF	0	0	0	0	0	0	1.79302	0	0	0	0.373901	no
CASSDRGRRTGQLYNCESGSF	0	0	0.276198	0	0	0	0	0	0	0	0.373901	no
CGVDWGGAAETLYF	0	0	0	0	0	0	0	0	0.122106	0	0.373901	no
CAWRSGGGGGGAEQF	0.249213	0	0	0	0	0	0	0	0	0	0.373901	no
CASGDAEGAFDYTF	0	0	1.10479	0	0	0	0	0	0	0	0.373901	no
CASGDALGVNYAVQF	0	0.125119	0	0	0	0	0	0	0	0	0.373901	no
CASGGMGTGNERLF	0.373819	0	0	0	0	0	0	0	0	0	0.373901	no
CASSGGGGF	0	0	0	0	0	0.294952	0	0	0	0	0.373901	no
CASSPDRDSYEQYF	0	0.125119	0	0	0	0	0	0	0	0	0.373901	no
CASSLGQSYAQYF	0	0.125119	0	0	0	0	0	0	0	0	0.373901	no
CASSRDWDRAAEQF	0	2.25213	0	0	0	0	0	0	0	0	0.373901	no
CASSRDWGGYAEQLF	1.37067	0	0	0	0	0	0	0	0	0	0.373901	no
CSGGRNTEVFFGKGTRLTVAPPTAGAGQNNSPLYF	0	0	0	0	0	0.294952	0	0	0	0	0.373901	no
CASSHDWAAETLYF	0	0	0	0	0	0.147476	0	0	0	0	0.373901	no
CVICTAGAVQGSALANMSQGRTLYCTRSADYTEVF	0	0	0	0.154288	0	0	0	0	0	0	0.373901	no
CAGTEVLFSQPQDSAVHLCASSLAGYNSPLYF	0	0	0	0.154288	0	0	0	0	0	0	0.373901	no
CASSVGGTSAETLYF	0.124606	0	0	0	0	0	0	0	0	0	0.373901	no
CASSLEGRGNTEVF	0	853.559	0	0	0	0	0	0	0	0	0.373901	no
CASSVDRGWRTISNERLF	0.124606	0	0	0	0	0	0	0	0	0	0.373901	no
CAGGDALTGTGNTLYF	3.36437	0	0	0	0	0	0	0	0	0	0.373901	no
CTSSLERGLPDTQYF	0	0	0	0	0	0.147476	0	0	0	0	0.373901	no
CATGTANTEVF	0	0	0	0	0	0.147476	0	0	0	0	0.373901	no
CSAGDWGDHAEQFFGPGTRLTVLENLRNVTPPSPLHCRCSRVQDTQYF	0	0	0.138099	0	0	0	0	0	0	0	0.373901	no
CASSDAGQEDTRYF	0.124606	0	0	0	0	0	0	0	0	0	0.373901	no
CTSSADPVTTLYF	0	0	0	0	0	0	0.128073	0	0	0	0.373901	no
CSANQGGNERSF	0	0	0.138099	0	0	0	0	0	0	0	0.373901	no
CASSPGLVAEQF	0	2.50237	0	0	0	0	0	0	0	0	0.373901	no
CASSLDWTGIDAQYF	0	0	0	0	0	0	0	0.132106	0	0	0.373901	no
CASDRGDTQYF	0	0	0	14.6574	0	0	0	0	0	0	0.373901	no
CASTKATEVF	0	0.125119	0	0	0	0	0	0	0	0	0.373901	no
CSADGSSTEVF	0	2.0019	0	0	0	0	0	0	0	0	0.373901	no
CASRRTGDNQAPLF	0.373819	0	0	0	0	0	0	0	0	0	0.373901	no
CSADREYTQYF	0	0	0	0.154288	0	0	0	0	0	0	0.373901	no
CASSGTGYAEIF	0	0	0	0.154288	0	0	0	0	0	0	0.373901	no
CASSQEDWGGGAEQF	0	0	0.690496	0	0	0	0	0	0	0	0.373901	no
CSGQGRNSPLSTAGANDNPF	0	0	0	0	0	0.294952	0	0	0	0	0.373901	no
CASSPNRGLFSNERLF	0	0	0	0	0	0	0	0.132106	0	0	0.373901	no
CVSSVWDKEVF	0	0	0	0	0	0	0	0.132106	0	0	0.373901	no
CSAERYRSPLYF	0	0	0	0	0	0	0	0.132106	0	0	0.373901	no
CASSLRTGANERLF	0	0.250237	0	0	0	0	0	0	0	0	0.373901	no
CASSPGQANSDHTF	1.12146	0	0	0	0	0	0	0	0	0	0.373901	no
CLPFWICTCLAGGYAEQF	0	0	0	0	0	0	0.128073	0	0	0	0.373901	no
CASSEGWGYEQYF	0	0	0	0	0	0.147476	0	0	0	0	0.373901	no
CSADRNSPLYF	0	0	0	0	0	0.147476	0	0	0.122106	0	0.180319	no
CASSDEGVANSDYTF	0	0	0	0	0.120294	0	0	0	0	0	0.373901	no
CSTDRGGYEKYF	0	0	0.138099	0	0	0	0	0	0	0	0.373901	no
CTYSADEGQGAGNTLYF	0	0	0	2.31433	0	0	0	0	0	0	0.373901	no
CSLEGEQQYF	0.124606	0	0	0	0	0	0	0	0	0	0.373901	no
CSLGTGRDQQYF	0	0	0	0	0	0	0	0.924743	0	0	0.373901	no
CASSLRDRGSDHTF	0	0	0	0	0.601471	0	0	0	0	0	0.373901	no
CASGDISNPDYTF	0	0.125119	0	0	0	0	0	0	0	0	0.373901	no
CSSRDRDWGETGQLYF	0	0	0.276198	0	0	0	0	0	0	0	0.373901	no
CASSDTKSEYTF	0	0	0	0	0	0	0	0	0.122106	0	0.373901	no
CVSGDRERNQAPLF	0	1.3763	0	0	0	0	0	0	0	0	0.373901	no
CSAEYSSPLDF	0	0	0.414297	0	0	0	0	0	0	0	0.373901	no
CTRSAERYNSPLYF	0	0	0	0	0	0	0	65.1284	0	0	0.373901	no
CASGDAKDRANSDCTF	0	0	0	0	0	0.442428	0	0	0	0	0.373901	no
CASSPRDSGAEQF	0	0	0.276198	0	0	0	0	0	0	0	0.373901	no
CANSGLGGLNTLYF	0	0	0	0	0	1.03233	0	0	0	0	0.373901	no
CASSLLGRGSSYEQYF	0.373819	0	0	0	0	0	0	0	0	0	0.373901	no
CAPPACTCSAEYAEQF	0	0	0.138099	0	0	0	0	0	0	0	0.373901	no
CSATRWGAGEQYF	0	0.125119	0	0	0	0	0	0	0	0	0.373901	no
CASSLGGGTGQPYF	0.124606	0	0	0	0	0	0	0	0	0	0.373901	no
CASSEATVGEQYF	0	0	0	0.154288	0	0	0	0	0	0	0.373901	no
CVSSQDSDSCNSPLYF	0	0.125119	0	0	0	0	0	0	0	0	0.373901	no
CASGTGDTEVF	2.11831	0.125119	0	0	0	0.147476	0	0	0	0	0.373338	no
CAWSLVVGGGQNTLPF	0	0	0	0.154288	0	0	0	0	0	0	0.373901	no
CREGAGTEVFFGWSHISQILYNCEPGSF	0	0	0.138099	0	0	0	0	0	0	0	0.373901	no
CSQAAGNQDTQYF	0.249213	0	0	0	0	0	0	0	0	0	0.373901	no
CSGDDSQNPLYF	0	0	0	0	0.120294	0	0	0	0	0	0.373901	no
CASSEGLGGRGAEQF	0	0	0	0	0.721765	0	0	0	0	0	0.373901	no
CASSATSNTGQHYF	0	0.500474	0	0	0	0	0	0	0	0	0.373901	no
CAWSLGDSAETQYF	0	0.125119	0	0	0	0	0	0	0	0	0.373901	no
CSGDGYEQDF	0	0	0	0	0	0.73738	0	0	0	0	0.373901	no
CASSQDGGADQDTQYF	0	0	0	0	0.481177	0	0	0	0	0	0.373901	no
CASGAGDREGYTF	0.249213	0	0	0	0	0	0	0	0	0	0.373901	no
CASSFRDSYAGQF	1.86909	0	0	0	0	0	0	0	0	0	0.373901	no
CASSQETGGVNYAEQF	0	0	0.828595	0	0	0	0	0	0	0	0.373901	no
CAWSLGGAGNPLYF	0.124606	0	0	0	0	0	0	0	0	0	0.373901	no
CASGDWGYNSPVYF	0	0	0	0	0	0.147476	0	0	0	0	0.373901	no
CASSFGTGGHNNAEQF	0	0	0	0	0	0	0	0	0.244212	0	0.373901	no
CGDSGRNNQAPLF	0	0	0.690496	0	0	0	0	0	0	0	0.373901	no
CASSVGTGGHNYAEQF	0	0	0	0	0	0	0	0	0.488424	0	0.373901	no
CASSDAQNAEVF	0	0	0	5.86296	0	0	0	0	0	0	0.373901	no
CSAGLGKDTQYF	0	0.125119	0	0	0	0	0	0	0	0	0.373901	no
CASSPDNANTGQLYF	0	11.5109	0	0	0	0	0	0	0	0	0.373901	no
CGADQCNAETLYF	0	0	0	0	0	0	0	0.132106	0	0	0.373901	no
CASSLGLGVYAEKF	0.124606	0	0	0	0	0	0	0	0	0	0.373901	no
CAWRRTINNQAQHF	0	0	0	0	0	0	0.256145	0	0	0	0.373901	no
CSAGQGADAQYF	0	0	0.138099	0	0	0	0	0	0	0	0.373901	no
CVSSQHPGANTLYF	0	0	0	0	0	0.147476	0	0	0	0	0.373901	no
CAWSLAGGPSSYEQYF	0.124606	0	0	0	0	0	0	0	0	0	0.373901	no
CTCSAVGTVEQYF	1.24606	0	0	0	0	0	0	0	0	0	0.373901	no
CASSRSGGNTEVF	0.249213	0	0	0	0	0	0	0	0	0	0.373901	no
CASGERRGSEQYF	0	0	0.138099	0	0	0	0	0	0	0	0.373901	no
CSAGEQGADTEVF	0	0	0	0	0	0	0	0	4.76214	0	0.373901	no
CSTPGADAEQF	0	0	0	0	0	0	60.8345	0	0	0	0.373901	no
CASSLWDRGSGNTLYF	0.124606	0	0	0	0	0	0	0	0	0	0.373901	no
CASSQDRGDQDTQHF	0	0	0	0	0	0	6.01941	0	0	0	0.373901	no
CASSIDGGQDTQYF	0	0	0	0	0.240588	0	0	0	0	0	0.373901	no
CASGGLGGLAEVF	0	0.375356	0	0	0	0	0	0	0	0	0.373901	no
CASSLAHAEMLYF	0	3.00284	0	0	0	0	0	0	0	0	0.373901	no
CASSPAGAESLYF	0	0	0	0	0	0	0	0	0.732637	0	0.373901	no
CASSQDWGCAEQSF	0	0	0.138099	0	0	0	0	0	0	0	0.373901	no
CASSSRDWGFSYEQHF	1.9937	0	0	0	0	0	0	0	0	0	0.373901	no
CASDDSGAEMLYF	0	0	0	0.462865	0	0	0	0	0	0	0.373901	no
CASTAGGHEQYF	0	0.250237	0	0	0	0	0	0	0	0	0.373901	no
CASSPTGDTGQLEF	0	0.250237	0	0	0	0	0	0	0	0	0.373901	no
CSPDSGTGQLYF	2.99055	0	0	0	0	0	0	0	0	0	0.373901	no
CASSGTSNTGQLYF	0	0.125119	0	0	0	0	0	0	0	0.373614	0.556562	no
CASSLNRGATTGQLYF	0	0	0	0	0	0	0	0	0.244212	0	0.373901	no
CASSLLGVQDTQYFGPGTRLLYNNEPASF	0	0	0	0	0	0.147476	0	0	0	0	0.373901	no
CASSLPGLGTSAEALYF	0	0.125119	0	0	0	0	0	0	0	0	0.373901	no
CSAERGGFGNTLYF	0	0	0	0	0	2.50709	0	0	0	0	0.373901	no
CAGSPDKPYEQYF	0	0	0	0.154288	0	0	0	0	0	0	0.373901	no
CSGGQLHNSPLYF	0.498425	0	0	0	0	0	0	0	0	0	0.373901	no
CSGGLGEQNTVYF	0	0.125119	0	0	0	0	0	0	0	0	0.373901	no
CSARLGGTEQF	0	0	0	0	0	0	0	0	0	2.6153	0.373901	no
CASRLDGVGAQYF	0.124606	0	0	0	0	0	0	0	0	0	0.373901	no
CAIRDSSNERLF	0.623032	0	0	0	0	0	0	0	0	0	0.373901	no
CALTGGQDTQYF	0	0	0	0	0	0.294952	0	0	0	0	0.373901	no
CTSSNVGYEQYF	0	0	0	0	0	0.589904	0	0	0	0	0.373901	no
CSAEGAPLFGEGTPYEQCF	0	0	0	0	0	0	0	0.132106	0	0	0.373901	no
CASSQEGVGNTEASF	0	0.125119	0	0	0	0	0	0	0	0	0.373901	no
CASRQGTGKNPDYTF	0.249213	0	0	0	0	0	0	0	0	0	0.373901	no
CASGLRAENTLYF	0	0	0	0	0.120294	0	0	0	0	0	0.373901	no
CTCSADRDNYAEQF	0	0	0	0	0	3.39195	0	0	0	0	0.373901	no
CSGDSPYAGQLF	0	0	0	0	0	0.147476	0	0	0	0	0.373901	no
CSADRGIEVF	0	0.250237	0	0	0	0	0	0	0	0	0.373901	no
CASSDAGLGYEQYF	0	0	0	0	0	0.442428	0	0	0	0	0.373901	no
CAIRGAETLYF	0.124606	0	0	0	0	0	0	0	0	0	0.373901	no
CASGDAGRGSAEMLYF	0	0	0.690496	0	0	0	0	0	0	0	0.373901	no
CSAGRGGQNTLYF	0	0.125119	0	0	0	0.294952	0	0	0	0	0.617148	no
CSVEGATEVFFGWSHISQILYNCESGSF	0	0	0	0	0.120294	0	0	0	0	0	0.373901	no
CASSPQGPNSDYTF	0	0	0	0	0	0	0	0	11.9664	0	0.373901	no
CASSSDREVSNERLF	0	1.50142	0	0	0	0	0	0	0	0	0.373901	no
CASRTASNERVF	0	0	0	0.462865	0	0	0	0	0	0	0.373901	no
CSAAPTDNSPLYF	0	0	1.93339	0	0	0	0	0	0	0	0.373901	no
CASEDAGTGGSQNTLYF	0.498425	0	0	0	0	0	0	0	0	0	0.373901	no
CASSFWGRAETLDF	0	0	0	0.154288	0	0	0	0	0	0	0.373901	no
CSRNRYYAEQLF	0	0.125119	0	0	0	0	0	0	0	0	0.373901	no
CRTLGSAETVYF	0	0.125119	0	0	0	0	0	0	0	0	0.373901	no
CTAGADQDWGGWHNTLYF	0	0	0	0.154288	0	0	0	0	0	0	0.373901	no
CARSAGNYAEQF	0	0	0	0.617154	0	0	0	0	0	0	0.373901	no
CASNDLTNSDYTF	0	0	1.10479	0	0	0	0	0	0	0	0.373901	no
CSGTANTAQLYF	0.124606	0	0	0	0	0	0	0	0	0	0.373901	no
CDSSETGGDTLYF	0	0	0.552396	0	0	0	0	0	0	0	0.373901	no
CSAFRDGNTEVF	0	0	0	0	0	0	0.128073	0	0	0	0.373901	no
CASSPPGTGGNYAEQF	0.373819	0	0	0	0	0	0	0	0	0	0.373901	no
CTRSADLGGRFDTQYF	0.124606	0	0	0	0	0	0	0	0	0	0.373901	no
CSAGASNYAEQF	0	0	0	0	0.120294	0	0	0	0	0	0.373901	no
CRARGGSSETLSF	0	0	0	0	0	0	0.128073	0	0	0	0.373901	no
CASSAWDSSGNTLYF	0	0	0	0.462865	0	0	0	0	0	0	0.373901	no
CASYPPRAISNERLF	0.124606	0	0	0	0	0	0	0	0	0	0.373901	no
CSSTAAFSDVRLF	0	0	0	0	0.120294	0	0	0	0	0	0.373901	no
CSSSQSRDALYF	0	0.125119	0	0	0	0	0	0	0	0	0.373901	no
CASSSGVAGNTLYF	0	0	0	0.154288	0	0	0	0	0	0	0.373901	no
CASSDFSSYVQYF	0	0.250237	0	0	0	0	0	0	0	0	0.373901	no
CTIEIQSSKLTDSAVYFYASGQSRDHYAEQF	0	0	0	0	0	0	0	0.264212	0	0	0.373901	no
CSAPTGDTEVF	0	0.125119	0	0	0	0	0	0	0	0	0.373901	no
CPSSATSAETLYF	0	0	0	0.462865	0	0	0	0	0	0	0.373901	no
CVSGPRDKYAEQF	0	0	0	0	0	2.35962	0	0	0	0	0.373901	no
CASGDATGGASAEVF	0	0	0	0	0	3.097	0	0	0	0	0.373901	no
CASSVTAGGYAEQF	0.124606	0	0	0	0	0	0	0	0	0	0.373901	no
CANSRQGSNERLF	0	0	0	0.617154	0	0	0	0	0	0	0.373901	no
CASSFGNPGNTLYF	0	0.500474	0	0	0	0	0	0	0	0	0.373901	no
CSSTAAFSYERLF	0	0	0	0	0.962353	0	0	0	0	0	0.373901	no
CASSPRGDIGQPYF	0	0	0	0	0	0	0.384218	0	0	0	0.373901	no
CASSDRSYAEQYF	0	0	0.138099	0	0	0	0	0	0	0	0.373901	no
CASSQLDRGRF	0.373819	0	0	0	0	0	0	0	0	0	0.373901	no
CASGVRDTEVTQYF	0	0	0	0.154288	0	0	0	0	0	0	0.373901	no
CSAGPDISYNSPLYF	0	0	0	0	0	0	2.8176	0	0	0	0.373901	no
CASGGGNYAEQF	0	0.125119	0	0	0.360882	0	0	0	0	0	0.238576	no
CASGEGTITEVSF	0	0.625593	0	0	0	0	0	0	0	0	0.373901	no
CASGQAGGWEQYF	0	0	0	0	0	0	0	0	4.64003	0	0.373901	no
CASSQDPVNQDTQYF	0	0	0	0	4.09	0	0	0	0	0	0.373901	no
CASSLDWANTEVLF	0	0	0	0	0.120294	0	0	0	0	0	0.373901	no
CASGANTGHAEQF	0	0	0.138099	0	0	0	0	0	0	0	0.373901	no
CASGQGQFSNERSF	0	0	0	0	0	0.294952	0	0	0	0	0.373901	no
CSAGGQGAAPLF	0	0	0	0	0.120294	0	0	0	0	0	0.373901	no
CASDDSGASYEQYF	0	0	0	0.154288	0	0	0	0	0	0	0.373901	no
CAAGTTNTEAF	0	0.125119	0	0	0	0	0	0	0	0	0.373901	no
CASSQAGQHNNRDPLF	0	0	0	0	0	0	0.128073	0	0	0	0.373901	no
CASSSDNSYEQYF	0	0.250237	0	0	0	0	0	0	0	0	0.373901	no
CASSERVSNEKLF	0	0.750711	0	0	0	0	0	0	0	0	0.373901	no
CSADLRYNSPQYF	0.124606	0	0	0	0	0	0	0	0	0	0.373901	no
CASSPTEGPSSAETLYF	0	0.125119	0	0	0	0	0	0	0	0	0.373901	no
CSAGDGYAEQCF	0	0.250237	0	0	0	0	0	0	0	0	0.373901	no
CASSRECWGAETLYF	0	1.62654	0	0	0	0	0	0	0	0	0.373901	no
CGAAGGAGNSPHYF	0	0	0	0	0	0	0.128073	0	0	0	0.373901	no
CISTGTGGGQNTLYF	0	0	0	0	0	0	0.384218	0	0	0	0.373901	no
CARSDAGDSPLYF	0	0	0	48.2923	0	0	0	0	0	0	0.373901	no
CTSGEDWGGPYAEQF	0.872244	0	0	0	0	0	0	0	0	0	0.373901	no
CAWSLGPGRNNSPLHF	0	0	0	0.154288	0	0	0	0	0	0	0.373901	no
CASTDGGTEVF	0	0.125119	0	0	0	0	0	0	0	0	0.373901	no
CSAPHWGQDRADTEVF	0	0	0	0	0	0	0	0	0.488424	0	0.373901	no
CASRDWGSSDYTF	0.249213	0	0	0	0	0	0	0	0	0	0.373901	no
CASGGQGYNSPLYF	0.124606	0	0	0	0	0.294952	0	0	0	0	0.615938	no
CASGRLDKYAEQF	0.249213	0	0	0	0	0	0	0	0	0	0.373901	no
CSARDRGYNSPLF	0	0.125119	0	0	0	0	0	0	0	0	0.373901	no
CSADCNAYDSALYF	0	0	0	0	0	0	0.128073	0	0	0	0.373901	no
CARGEISKERLF	0	0	0	0	0	0	0	0.132106	0	0	0.373901	no
CASSRIWGYEQCF	0	0	0	0	0	0	0	0	0	0.124538	0.373901	no
CASSPDRNYAEQF	0.872244	0	0	0	0	0	0	0	1.09895	0	0.875841	no
CANMSQGRTLYCTCSALRDRNTGVF	0	0	0	0	0	0	0.128073	0	0	0	0.373901	no
CASGEMGTGNARLF	0.249213	0	0	0	0	0	0	0	0	0	0.373901	no
CASSAGTGDYINQAPPF	0	0	0	0	0	0	0	0	0	0.124538	0.373901	no
CSAATGGSPNERLF	0	0	0	0	0	0.147476	0	0	0	0	0.373901	no
CSAPHWVSWTPVKLTAQKDTAVYFCASSFTGVQDTQYF	0	0	0	0	0	0	0	0	0.122106	0	0.373901	no
CSNRQGSTEVF	0	0	0	0	0	0	0.128073	0	0	0	0.373901	no
CASSDRWRANTGQLYF	0	0	0	0.462865	0	0	0	0	0	0	0.373901	no
CASGDRGRRAETLYF	0	1.12607	0	0	0	0	0	0	0	0	0.373901	no
CSATGIKHAPLF	0	0	0	0	0.120294	0	0	0	0	0	0.373901	no
CSADPGYDTLCF	0	0	0	0	0	0	0	0	0.122106	0	0.373901	no
CTRSADPGAGSAETLYF	0.124606	0	0	0	0	0	0	0	0	0	0.373901	no
CASSPVRVEQYF	0	0	0	0	0	0	0	0	0.61053	0	0.373901	no
CASSPQGANERLF	0	0	0	0.462865	0	0	0	0	0	0	0.373901	no
CASGDDGQSSYEQYF	0.498425	0	0	0	0	0	0	0	0	0	0.373901	no
CTSGDAVTLNNQAPLF	0.124606	0	0	0	0	0	0	0	0	0	0.373901	no
CTSSQKRGGRDQDTQYF	0	0.125119	0	0	0	0	0	0	0	0	0.373901	no
CSADQGWGKTLYF	0	0.250237	0	0	0	0	0	0	0	0	0.373901	no
CASSLGLGGYPDTQYF	0	0	0	0.308577	0	0	0	0	0	0	0.373901	no
CASGRQGVAEQF	0.249213	0	0	0	0	0	0	0	0	0	0.373901	no
CQGTANTEVF	0	0	0	0	2.40588	0	0	0	0	0	0.373901	no
CASSQEGTGGSYEQHF	0	0.625593	0	0	0	0	0	0	0	0	0.373901	no
CASSLWGSSDYTF	0	1.3763	0	0	0	0	0	0	0	0	0.373901	no
CASSEGTVGEPYF	0	0	0	0.771442	0	0	0	0	0	0	0.373901	no
CSASRGQDTPQSTAGAVGDEQYF	0	0	0	0	0	0	0	0.132106	0	0	0.373901	no
CTGSALGVQDTQYF	0	0	0	0	0	8.84856	0	0	0	0	0.373901	no
CASSLGAATEVF	0	0.125119	0	0	0	0	0	0	0	0	0.373901	no
CASSPDRVQDTQYF	0	0	0	0	0	0	0	0	0.122106	0	0.373901	no
CAIGDAQYEQYF	0	0	0.276198	0	0	0	0	0	0	0	0.373901	no
CSPGDWGEQHF	0	0	0	0	0	0	0.128073	0	0	0	0.373901	no
CASSQDQLDQDTQHF	0	0.87583	0	0	0	0	0	0	0	0	0.373901	no
CASGDAGLGDNQDTQYF	0	0	0	0.308577	0	0	0	0	0	0	0.373901	no
CASDRDRGSGNTLYF	0.124606	0	0	0	0	0	0	0	0	0	0.373901	no
CSEGLGDNYTEQF	0	0	0	0	0.601471	0	0	0	0	0	0.373901	no
CARTKVQGVLTSFCGICTCSAVRDSNTGQLYF	0	0	0.138099	0	0	0	0	0	0	0	0.373901	no
CASSHRDWRTSSASLSF	0.124606	0	0	0	0	0	0	0	0	0	0.373901	no
CANMSQGRTLYCTCSADQGGGAETLYF	0	0.250237	0	0	0	0	0	0	0	0	0.373901	no
CSGTGAANTLYF	0	0	0.414297	0	0	0	0	0	0	0	0.373901	no
CASSLSWTGGSQNTSYF	2.99055	0	0	0	0	0	0	0	0	0	0.373901	no
CASNDPDNYAEQF	0.124606	0	0	0	0	0	0	0	0	0	0.373901	no
CTSPPCTTDTELRLQVANMSQGRALYCTCSGTGRTSAETLYF	0	0	0	0	0	0	0	0	0	0.249076	0.373901	no
CTSKTGDTQYF	0	0.125119	0	0	0	0	0	0	0	0	0.373901	no
CSADSAGASNTEVF	0	0.125119	0	0	0	0	0	0	0	0	0.373901	no
CASGAQGSSQAPLF	0	1.62654	0	0	0	0	0	0	0	0	0.373901	no
CASSQVPGTNTGQLYF	0	0	0	0	0	2.80205	0	0	0	0	0.373901	no
CSAGGGAAAEYTF	0	0	0	0.154288	0	0	0	0	0	0	0.373901	no
CASSPDWGSYEQYF	3.23976	1.00095	0	0	2.28559	0	0	0	0	0	0.111189	no
CARAGQYEQYF	0	0.125119	0	0	0	0	0	0	0	0	0.373901	no
CGEAGGSTEVF	0	0	1.24289	0	0	0	0	0	0	0	0.373901	no
CASRGTGGENTLYF	0.124606	0	0	0	0	0	0	0	0	0	0.373901	no
CASSDDGGAEQF	0	0	0	0	0	0.147476	0	0	0	0	0.373901	no
CSGDNSGNTLYF	0	0	0	0	0.481177	0	0	0	0	0	0.373901	no
CASSTTPNSDYYF	0	0	0	0	0	0	0	0.132106	0	0	0.373901	no
CASGESKGNSDYTF	0.124606	0	0	0	0	0	0	0	0	0	0.373901	no
CTGSGGRSNTEVF	0	0.125119	0	0	0	0	0	0	0	0	0.373901	no
CASSLVGRSTETLYF	0	0.250237	0	0	0	0	0	0	0	0	0.373901	no
CAWTLGDWGLSAETLYF	0.124606	0	0	0	0	0	0	0	0	0	0.373901	no
CASGSGTGSSNERLF	0	0.375356	0	0	0	0	0	0	0	0	0.373901	no
CASSDRNSPLYF	0	477.452	0	0	0	0	0	0	0	0	0.373901	no
CGATQTSSDYTF	0	0	0	0	0	0	0	0	0.488424	0	0.373901	no
CASTCRPSQNYAEQF	0	0	0	0	0	0	0	0.132106	0	0	0.373901	no
CASSIPGLGSETLYF	0	3.50332	0	0	0	0	0	0	0	0	0.373901	no
CASSQERDRDTQHF	0	1.00095	0	0	0	0	0	0	0	0	0.373901	no
CAWSRSNQAPLF	0	0	0	0.462865	0	0	0	0	0	0	0.373901	no
CSQEDWGNYEQYF	0	0	0.690496	0	0	0	0	0	0	0	0.373901	no
CSASSQEGVGGRRSAETLHF	0	0	0	0	0	0	0	0	0	0.249076	0.373901	no
CASCPRTGGSYEQYF	0	0	0	0	0	0	0	0	0.122106	0	0.373901	no
CSPTGDSAETLYF	0	0	0	0	0	0	0.51229	0	0	0	0.373901	no
CSAATGGAEVF	0	0	1.51909	0	0	0	0	0	0	0	0.373901	no
CASSLARQGGGAQYF	0.124606	0	0	0	0	0	0	0	0	0	0.373901	no
CLRRRGGSQNTLYF	0	0	0	0	0	0	0	0.132106	0	0	0.373901	no
CASSLLRDEQYF	0.249213	0	0	0	0	0	0	0	0	0	0.373901	no
CASGDGGRGCAEQF	0.373819	0	0	0	0	0	0	0	0	0	0.373901	no
CSAPGPDANTEVF	0	0	0	0	0	0.73738	0	0	0	0	0.373901	no
CTRSAENNQDTQYF	0	0	1.93339	0	0	0	0	0	0	0	0.373901	no
CANSDGTIYNSPLYF	0	0	0	0	0	0.442428	0	0	0	0	0.373901	no
CASSGQGGYAAVF	0.124606	0	0	0	0	0	0	0	0	0	0.373901	no
CAGSGINQDTQCF	0	0	0	0	0	0	0	1.45317	0	0	0.373901	no
CASSSRLTSAETPYF	0	1.12607	0	0	0	0	0	0	0	0	0.373901	no
CSAPGHFNSFCSLYIGSAGLEYSAMYLCASSWANYAEQF	0.124606	0	0	0	0	0	0	0	0	0	0.373901	no
CASGGPRQGPDYTF	0.124606	0	0	0	0	0	0	0	0	0	0.373901	no
CTRSAPTGASNTEVF	0	1.75166	0	0	0	0	0	0	0	0	0.373901	no
CSAETGGSAETPYF	5.60728	0	0	0	0	0	0	0	0	0	0.373901	no
CAWSLAGGSQNTSYF	1.61988	0	0	0	0	0	0	0	0	0	0.373901	no
CSAEPIANERLSF	0	0	0	0.154288	0	0	0	0	0	0	0.373901	no
CASSQERVGYAEQLF	0	0	0	0	0	0	0	0	0.122106	0	0.373901	no
CARSLGRGNSPLYF	0	0	0	0	0.120294	0	0	0	0	0	0.373901	no
CASSPGLPYEQYF	0.373819	0	0	0	0	0	0	0	0	0	0.373901	no
CSARQLQATFTYICRGSRRLSCLFLSKHQRRVGGRRSAETLYF	0	0	0	0	0	0	0	0	0	0.124538	0.373901	no
CANSQAQGYEQYF	0	0.125119	0	0	0	0	0	0	0	0	0.373901	no
CASGDATGNYNSPLYF	0	0	0	0	0	0.294952	0	0	0	0	0.373901	no
CASSAGPFNRDTQYF	0	0	0	3.39435	0	0	0	0	0	0	0.373901	no
CASSLGDRGDTLYF	0	0.750711	0	0	0	0	0	0	0	0	0.373901	no
CASSFSRARETLYF	0.124606	0	0	0	0	0	0	0	0	0	0.373901	no
CATGGANTGQLYF	0	0	0	0	0	0.147476	0	0	0	0	0.373901	no
CSAAQEHYF	0	0	0	0	0	0	0	0	0.122106	0	0.373901	no
CASSLAWDRGYEQYF	0	0.125119	0	0	0	0	0	0	0	0	0.373901	no
CASSQGGTGCLPPLHCRCSTRGGDTQYF	0	0	0	0	0	0	0	0	0.122106	0	0.373901	no
CASSLGNEVF	0	0.125119	0	0	0	0	0	0	0	0	0.373901	no
CSSDGDWGSQNTLYF	0	0	0.276198	0	0	0	0	0	0	0	0.373901	no
CASRPLGDYAGQF	0	0	0	0	0	0	0.128073	0	0	0	0.373901	no
CTRSAAGASYGQYF	0	0	0	0	0	0.147476	0	0	0	0	0.373901	no
CASSLPQTGQF	0	0	0	0	0	0	0	0	0.122106	0	0.373901	no
CVCTCSAGGLYEQYF	0	0	0	0	0	0.147476	0	0	0	0	0.373901	no
CASSFTSNTGQLYF	0	0	0.276198	0	0	0	0	0	0	0	0.373901	no
CSADPEGGTEVLF	0	0	0	0	0	0	0.384218	0	0	0	0.373901	no
CASSFGMGGQDTQYF	0	0.125119	0	0	0	0	0	0	0	0	0.373901	no
CAGSDVGDEQYF	0	0	0	0	0	0.147476	0	0	0	0	0.373901	no
CASSDINERLLF	0	0	0	4.47437	0	0	0	0	0	0	0.373901	no
CSVGQGGTNEGLF	0	0	0	0	0	0.147476	0	0	0	0	0.373901	no
CASGDALTGGGQDTQYF	0.249213	0	0	0	0	0	0	0	0	0	0.373901	no
CTRSADQGAGSAETLYF	85.4799	0	0	0	0	0	0	0	0	0	0.373901	no
CAGSPGQGAYEQYF	1.24606	0	0	0	0	0	0	0	8.91374	0	0.440565	no
CSAGPEVF	0	1.62654	0	0	0	0	0	0	0	0	0.373901	no
CSARDRGRDEQYFGPCPLHCRCSLTGGSNQDTQYF	0	0.125119	0	0	0	0	0	0	0	0	0.373901	no
CSPSGTGGKVYEQYF	0	0.125119	0	0	0	0	0	0	0	0	0.373901	no
CSARTGDNSPLYF	0	1.50142	0	0	0	0	0	0	0	0	0.373901	no
CDSGPGGAEVF	0	0	0	0	0	0.442428	0	0	0	0	0.373901	no
CSAPGQPLSNERLFFGHGKRLSRGTAGAGRAEQF	0	0	0.138099	0	0	0	0	0	0	0	0.373901	no
CASSPGGVSYERYF	0.623032	0	0	0	0	0	0	0	0	0	0.373901	no
CSSRNQAPPF	0	0	0	0	0	0	0	0	0	0.124538	0.373901	no
CASGEGGGQDTEYF	0	0	0.138099	0	0	0	0	0	0	0	0.373901	no
CSLDIQSSEAGDSALHLCASSLAHAETLYF	0	0.125119	0	0	0	0	0	0	0	0	0.373901	no
CASSQHDTQYF	0	0	0	0	0	0	0	0	0	4.85699	0.373901	no
CASSRTEISSERLF	0	0	0	0.154288	0	0	0	0	0	0	0.373901	no
CASSGASRSSAETLYF	0	0	0	0.154288	0	0	0	0	0	0	0.373901	no
CASSFYTANTLYF	0	0	0	0	0	0	0	0	0	0.124538	0.373901	no
CASSDDWGGEVETLYF	0	0	0.552396	0	0	0	0	0	0	0	0.373901	no
CASRSTGGYDYAEQF	0	0	0	6.17154	0	0	0	0	0	0	0.373901	no
CASGDAPGLGGVNQDTQYF	0.124606	0	0	0	0	0	0	0	0	0	0.373901	no
CSASRGQNTLYFGASRSGQEGTEVF	0	0	0	0	0	0	0	0	0	0.124538	0.373901	no
CTADRGQYEQYF	0	0	0.138099	0	0	0	0	0	0	0	0.373901	no
CASSVDSQDIQCF	0	0	0	0	0	1.91719	0	0	0	0	0.373901	no
CSGMEDTQYF	0	0.125119	0	0	0	0	0	0	0	0	0.373901	no
CASGDRAGGAGQSTLYF	11.713	0	0	0	0	0	0	0	0	0	0.373901	no
CASSLSHFSNERRF	0	0	0	0.154288	0	0	0	0	0	0	0.373901	no
CASRSEVF	127.348	0	0	0	0	0	0	0	0	0	0.373901	no
CSVAKNPDYTF	0	0.250237	0	0	0	0	0	0	0	0	0.373901	no
CSSSQALTGQLYF	0	0	0.414297	0	0	0	0	0	0	0	0.373901	no
CAWSLTGGGNYAEQF	0	0	0	0	0.601471	0	0	0	0	0	0.373901	no
CSALGGHAEQF	0	0.125119	0	0	0	0	0	3.03844	0	0	0.392138	no
CASSDSGYAEQF	0.124606	0	0	0	0	0	0	0	0	0	0.373901	no
CASGDARTNAEQF	0.373819	0	0	0	0	0	0	0	0	0	0.373901	no
CVSSLGWDSAETLYF	0	0	0	0	0	0.147476	0	0	0	0	0.373901	no
CASGQGTNYAEQF	0	0.125119	0	0	0	0	0	0	0	0	0.373901	no
CSSSPGLGGYEQYF	0.124606	0	0	0	0	0	0	0	0	0	0.373901	no
CASSRLGGRAEQCF	0	0.125119	0	0	0	0	0	0	0	0	0.373901	no
CASIQGGGAYAEQF	0	0.250237	0	0	0	0	0	0	0	0	0.373901	no
CASGRTGPNSDCTF	0	0	0	0	0	0	0	0	0.122106	0	0.373901	no
CASSPDWGANSDF	0	0.125119	0	0	0	0	0	0	0	0	0.373901	no
CASGEGRASAETLYF	0.373819	0	0	0	0	0	0	0	0	0	0.373901	no
CAGSDAGDSPPYF	0	0	0	0.617154	0	0	0	0	0	0	0.373901	no
CASSSWGGTNTGQLYF	0	0.250237	0	0	0	0	0	0	0	0	0.373901	no
CSVTGGNQTPLF	0	0	0	0	0	0	0	0	0	0.124538	0.373901	no
CSADEGSYNSPLF	0	0	0	0	0	0	0	0	0	15.8163	0.373901	no
CAWSQLGGSAETLYF	0	0	4.69537	0	0	0	0	0	0	0	0.373901	no
CSADTGGNTPLYF	0	0	0	0	0	0	0	0	0.61053	0	0.373901	no
CANSLGTVNQDTQYF	0	1.12607	0	0	0	0	0	0	0	0	0.373901	no
CASNPGATEVF	0	0	0	0	0.601471	0	0	0	0	0	0.373901	no
CASSGLAEGEQYF	0	0	0	0	0.240588	0	0	0	0	0	0.373901	no
CSAPGGVNTGQPYF	0	0	0	0	0	0	0	0	0.122106	0	0.373901	no
CASGEGGTGEYEQYF	0.498425	0	0	0	0	0	0	0	0	0	0.373901	no
CSAETGGSYEQYF	0.623032	0	0	0	0	0	0	0	0	0	0.373901	no
CASSQGLGGPDTQYF	0	0	0	0	0	1.62224	0	0	0	0	0.373901	no
CSERDWVHQDTQYFGPGTRLLYNCESGAF	0	0	0	0.154288	0	0	0	0	0	0	0.373901	no
CSAAQGNTGIF	0	0	0.138099	0	0	0	0	0	0	0	0.373901	no
CASSLGHSAETLYF	0.872244	0	0	0	0	0	0	0	0	0	0.373901	no
CTCSATGVGGNTLYF	0	0	0	0	5.77412	0	0	0	0	0	0.373901	no
CASSPRGRQNTLYCTCGATGINQAPLF	0	0	0	0	0.120294	0	0	0	0	0	0.373901	no
CAWSSQEHTEVF	0	1.00095	0	0	0	0	0	0	0	0	0.373901	no
CSADEGSWSSPLYF	0	0	0	0	0	0	0	0	0	0.124538	0.373901	no
CSAPHWVPPGLLAQRYSAESSEAGDSALYLCACSLGDREVF	0	0	0	0	0	0	0	0	0.122106	0	0.373901	no
CSPDWGIQDTQYF	0	0	0.276198	0	0	0	0	0	0	0	0.373901	no
CASSQGASAETLHF	1.49528	0	0	0	0	0	0	0	0	0	0.373901	no
CSGTEGNTEVLF	0	0	0	0	0	0	0.128073	0	0	0	0.373901	no
CASSDWVTYEQYF	0	0	0	0	0	1.91719	0	0	0	0	0.373901	no
CASSKGLKDTQYF	0.373819	0	0	0	0	0	0	0	0	0	0.373901	no
CSGAPSNQAQYF	0	0	0	0	0	0.147476	0	0	0	0	0.373901	no
CASSVTGGEQYF	0	0	0.138099	0.308577	0	0	0	0	0	0	0.216827	no
CASRQRDRGRGQNTLDF	0.373819	0	0	0	0	0	0	0	0	0	0.373901	no
CASSGINQDTQYSGPGTRLLYNCESGSF	0	0	0	0	0	0	0	0.132106	0	0	0.373901	no
CSAGGAGDQYF	0	0.125119	0	0	0	0	0	0	0	0	0.373901	no
CGDARDSNERLF	0	0	0	0	0	0.147476	0	0	0	0	0.373901	no
CSADHWNSGKALYF	0	0	0	0	0.120294	0	0	0	0	0	0.373901	no
CQQLRDRYEQYF	0	0.125119	0	0	0	0	0	0	0	0	0.373901	no
CAWSPGDNQAPLF	0	0	1.10479	0	0	0	0	0	0	0	0.373901	no
CASGSPGQGNERLF	0	0	0.276198	0	0	0	0	0	0	0	0.373901	no
CAWSLPPGNSPLYF	0	0	0.276198	0	0	0	0	0	0	0	0.373901	no
CSGPGHANTEAF	0	0	0	0	0	0	0.256145	0	0	0	0.373901	no
CSADGDWGRQNTF	0	0	0.138099	0	0	0	0	0	0	0	0.373901	no
CANSQDLSYNNQVPLF	0	0	0	0.308577	0	0	0	0	0	0	0.373901	no
CSAVLGEQNTLYF	0	7.75735	0	0	0	0	0	0	0	0	0.373901	no
CASSQEGVGGRRSAETVYF	0	0	0	0	0	0	0	0	0	0.249076	0.373901	no
CANSDISAETLYF	1.37067	0	0	0	0	0	0	0	0	0	0.373901	no
CAGHQHTLYF	0	0	0	1.08002	0	0	0	0	0	0	0.373901	no
CASTQATEVLF	0	3.87867	0	0	0	0	0	0	0	0	0.373901	no
CASSHARDRYAEQF	0	0	0	0	1.08265	0	0	0	0	0	0.373901	no
CASSLGGALTEQF	0	0.125119	0	0	0	0	0	0	0	0	0.373901	no
CASSLGDIFSNESLF	0	0	0	0	0	1.76971	0	0	0	0	0.373901	no
CSATGTDANTEVF	0	0	0	0	0	2.50709	0	0	0	0	0.373901	no
CASSHPGQGQDVQYF	0	0.125119	0	0	0	0	0	0	0	0	0.373901	no
CASSPGGNSDYTLGSGTRLF	0	0	0	0.154288	0	0	0	0	0	0	0.373901	no
CASSDAHRSCYEQYF	0	0.125119	0	0	0	0	0	0	0	0	0.373901	no
CASSRGYSPHYF	0	0.375356	0	0	0	0	0	0	0	0	0.373901	no
CASSDGTEVLF	0.124606	0	0	0	0	0	0	0	0	0	0.373901	no
CSGTGAEQYF	0.249213	1.50142	0	0	0	0	0	0	0	0	0.29645	no
CASRLDF	0.373819	0	0	0	0	0	0	0	0	0	0.373901	no
CASSLVAGATGQNTLYF	0	0	0	0	0	0	0	0	0.244212	0	0.373901	no
CSGTGGNTETF	0	0	0	0	0	0	0.256145	0	0	0	0.373901	no
CASGEDNANSDHAF	0	0	0	0.462865	0	0	0	0	0	0	0.373901	no
CASGIRDRSSYEQYF	0	0	0	0	0	0	0	0	3.66318	0	0.373901	no
CSATGTGYNSALYF	0	0	0.138099	0	0	0	0	0	0	0	0.373901	no
CASSDRDWASAETLYF	0	0	0.138099	0	0	0	0	0	0	0	0.373901	no
CSGTGGAGQDTGQLYF	0.373819	0	0	0	0	0	0	0	0	0	0.373901	no
CSAGDRRAETLYF	0	0	0	0	0	0	0	0	5.49477	0	0.373901	no
CASFGSGGQNTLYF	0	0	0	0.308577	0	0	0	0	0	0	0.373901	no
CSENRDERYF	0	0.500474	0	0	0	0	0	0	0	0	0.373901	no
CASSFYTGNRLYF	0	0	0	0	0	0	0	0	0	0.249076	0.373901	no
CDSGDARNTGQLYF	0	0	0	0	0	0	0	0	1.83159	0	0.373901	no
CASSKDLANTEVF	0	0	0	0	0	0	0.384218	0	0	0	0.373901	no
CASGDDGGAVETLYF	0	0	0	0	0	0.147476	0	0	0	0	0.373901	no
CASSDMGQRNSDYSF	0	0	0.138099	0	0	0	0	0	0	0	0.373901	no
CASSPQGNRNTLYF	0	0	0	0.154288	0	0	0	0	0	0	0.373901	no
CNVGQNTGQLYF	0	0	0	0	3.96971	0	0	0	0	0	0.373901	no
CASSLHWGGNEQYF	0	0	0	5.70867	0	0	0	0	0	0	0.373901	no
CAWSLVGGMNQAQHF	0	0	0.414297	0	0	0	0	0	0	0	0.373901	no
CTADQGGGAETLYF	0	0.250237	0	0	0	0	0	0	0	0	0.373901	no
CASSPRGSGTETLYF	0.249213	0	0	0	0	0	0	0	0	0	0.373901	no
CASGDSHWGGPYAEQF	0.249213	0	0	0	0	0	0	0	0	0	0.373901	no
CASRSTGDYNYAGQF	0	0	0	0.154288	0	0	0	0	0	0	0.373901	no
CASGDGTGGVYAEQF	0	0.500474	0	0	0	0	0	0	0	0	0.373901	no
CASSDNGQSSYEQYF	0.373819	0	0	0	0	0	0	0	0	0	0.373901	no
CSADNGGINQDTHYLHCRCSGPGQDSGNTLYF	0.124606	0	0	0	0	0	0	0	0	0	0.373901	no
CASGDARDWGNYAEQLF	0	0	0	2.00575	0	0	0	0	0	0	0.373901	no
CSADGRTNERLF	0	0.250237	0	0	0	0	0	0	0	0	0.373901	no
CASSQDTELRLQVANMNQGRTLYCTCSASRGQDTQYF	0	0	0	0	0	0	0	0.132106	0	0	0.373901	no
CSPGLEGEDTQYF	0	0	0	0	0.120294	0	0	0	0	0	0.373901	no
CASGDEGGANSDYAF	0	0	0	0	0.120294	0	0	0	0	0	0.373901	no
CRGTGANTLYF	0	0	0	0	0	0	0	0	1.22106	0	0.373901	no
CSAVKSARF	0	0	0	0	0	0.147476	0	0	0	0	0.373901	no
CASIDARTGLSEQF	0	0	0	0	0.120294	0	0	0	0	0	0.373901	no
CSAGDRFYGDTLYF	0	0	12.9813	0	0	0	0	0	0	0	0.373901	no
CTSGDDLGGHNYAEQF	0	0.625593	0	0	0	0	0	0	0	0	0.373901	no
CAGSQGQDTGQRYF	0	0	0	0	0	0	0.128073	0	0	0	0.373901	no
CASSHTSYNSPLYF	0	0.125119	0	0	0	0	0	0	0	0	0.373901	no
CSKSQSDERLF	0	0	0	0	0	0	0	0	0.122106	0	0.373901	no
CTRSGNTEVF	0	0	0	0	0	0	0	0.132106	0	0	0.373901	no
CKQTGDQNTLYFGAGTKVQGVLPSLICTAGAETLYF	0	0	0.138099	0	0	0	0	0	0	0	0.373901	no
CASSDADRTDTEVF	0	0.500474	0	0	0	0	0	0	0	0	0.373901	no
CASGEGTGGHQDTQYF	0.124606	0	0	0.154288	0	0	0	0	0	0	0.181016	no
CSAEDGSYYEQYF	0	0.250237	0	0	0	0	0	0	0	0	0.373901	no
CASGDDRGSQNTLYF	0.747638	0	0	0	0	0	0	0	0	0	0.373901	no
CSGGSDYF	0	0	0	0	0	0	0	0.132106	0	0	0.373901	no
CDSSGGGNYAEQF	0	0	0	0	0.240588	0	0	0	0	0	0.373901	no
CASGDAGEASAETLYF	0.623032	0	0	0	0	0	0	0	0	0	0.373901	no
CFGASSHIWGDEQYF	0	0	0	0	0	0	0	0	0	0.124538	0.373901	no
CASSDANAEVF	0	0	0	0	0	1.03233	0	0	0	0	0.373901	no
CASGDAGGKWDTQYF	0	0	0	0.308577	0	0	0	0	0	0	0.373901	no
CTGSPGGGAETLYF	0	0.125119	0	0	0	0	0	0	0	0	0.373901	no
CVSNPTASNERLF	0	0	0	0	0	0	0	0	0	0.124538	0.373901	no
CASGTGGQDTQYF	0.124606	0	0.138099	0	0	0.147476	0.128073	0.132106	1961.51	0	0.373847	no
CSGDAGEHTLYF	0	0	0	0	0	0	0.128073	0	0	0	0.373901	no
CAWSLGTGDDTPYF	0	0	0	0	0	0	0	5.81267	0	0	0.373901	no
CASSQEGVGNTEGLF	0	0.125119	0	0	0	0	0	0	0	0	0.373901	no
CAGDSYAEQLF	0	0.125119	0	0	0	0	0	0	0	0	0.373901	no
CSLEIQSSEAGDSALYLWASSLEGSSYEQYF	0	0	0	0	0	0	0	0	0.122106	0	0.373901	no
CSPGHSNTDVF	0	0	0.138099	0	0	0	0	0	0	0	0.373901	no
CASADIFSNEKLF	0	0	0	0	0	0.147476	0	0	0	0	0.373901	no
CASGLEGAYQDTQYF	0	0	0	0.154288	0	0	0	0	0	0	0.373901	no
CSLILELASLSQTAVYFRASSDWDKEVF	0	0	0	0	0	0	0	0.132106	0	0	0.373901	no
CSADREDTQHF	0	0	0	1.3886	0	0	0	0	0	0	0.373901	no
CASSDQQGRGPDYTF	0.996851	0	0	0	0	0	0	0	0	0	0.373901	no
CAGSSPGTNERLF	0	0	0	0.154288	0	0	0	0	0	0	0.373901	no
CSLEIQSSGAGTEVLFIGAVSCTCSAGGNSDYTF	0.124606	0	0	0	0	0	0	0	0	0	0.373901	no
CAGGAPTGSNERLLF	0	0	0	0	0.120294	0	0	0	0	0	0.373901	no
CASSPGTDANTGVSF	0	0	0	0.154288	0	0	0	0	0	0	0.373901	no
CASSPDWANAEQF	0	0	0.276198	0	0	0	0	0	0	0	0.373901	no
CSSRGLFSNEWLF	0	0	0	0	0	0	0	0.132106	0	0	0.373901	no
CASSLAVTGVLGQNALYF	0	0	0	0	0	0	2.30531	0	0	0	0.373901	no
CSADWAPLF	0	0	0	0	0	0	0	0.132106	0	0	0.373901	no
CASSPRRLGGYAEQF	0	0	0.138099	0	0	0	0	0	0	0	0.373901	no
CSAEWGRNTGQLYF	0	0	0	0	0	0	0	0.264212	0	0	0.373901	no
CASSSRQNTGQLYF	0.498425	0	0	0	0	0	0	0	0	0	0.373901	no
CSAVGDEHYF	0	0	0	0	0	0	0	0.792637	0	0	0.373901	no
CSGDRISNESLF	0	0	1.10479	0	0	0	0	0	0	0	0.373901	no
CSADMAGDHEQYF	0	0.750711	0	0	0	0	0	0	0	0	0.373901	no
CASSQGRLGGSQTTLYF	0	0	0	0	0	0	0	0.132106	0	0	0.373901	no
CARSVQAYEQYF	0.498425	0	0	0	0	0	0	0	0	0	0.373901	no
CASSLYRTNTEVF	0	0	0	0	0.120294	0	0	0	0	0	0.373901	no
CASGELGNYAEQSF	0	1.62654	0	0	0	0	0	0	0	0	0.373901	no
CASSELGQSNERLF	0	0	0	0	0	0	0	0	4.88424	0	0.373901	no
CASSWGRPDSDYTF	0.124606	0	0	0	0	0	0	0	0	0	0.373901	no
CASIPYNSPLYF	0.124606	0	0	0	0	0	0	0	0	0	0.373901	no
CRGQLYF	0	0	0	0	0.120294	0	0	0	0	0	0.373901	no
CSADADWGAAGNTLYF	0	0.250237	0	0	0	0	0	0	0	0	0.373901	no
CAWSCGISNERLF	0	0	0.138099	0	0	0	0	0	0	0	0.373901	no
CSADRQGRNSPF	0	0	0	0	0	0	3.84218	0	0	0	0.373901	no
CASTNGQGHFF	0	0	0	0.154288	0	0	0	0	0	0	0.373901	no
CSRGAFNTEAF	0	0	0	0	0	0.442428	0	0	0	0	0.373901	no
CANSEQGYQDTQYF	0	0	0	1.08002	0	0	0	0	0	0	0.373901	no
CSQDPNSGNTLYF	0.249213	0	0	0	0	0	0	0	0	0	0.373901	no
CSAVQDSSAGQLYF	0	0	0.138099	0	0	0	0	0	0	0	0.373901	no
CIETVSNEGLF	0	0	0	0	0	0	0	0	0.122106	0	0.373901	no
CAGSDAQKDTKVF	0	0	0.276198	0	0	0	0	0	0	0	0.373901	no
CASSRDRGRDSGNTLCF	0.373819	0	0	0	0	0	0	0	0	0	0.373901	no
CSAPHWEPDTQYF	0	0	0	0	0	0	0	0	0.122106	0	0.373901	no
CASSPSNKEDFCAGAPICTCSETVSNERLF	0	0	0	0	0	0	0	0	0.122106	0	0.373901	no
CASSRGQGEGEQYF	0	0.125119	0	0	0	0	0	0	0	0	0.373901	no
CASSQDTWGSSETLYF	0	0	0	0	0	0	0	0	0.366318	0	0.373901	no
CASSLRGDTAVF	0	0	0	0	0	0	2.04916	0	0	0	0.373901	no
CAWSPAQGAVNTLYF	0	0	0.138099	0	0	0	0	0	0	0	0.373901	no
CSAEGASQNTLYF	0	0.125119	0	0	0	0	0	0	0	0	0.373901	no
CVSSLRDWGTSAETLYF	0	0	0	0	0	0	0	16.2491	0	0	0.373901	no
CASSAGGHNTLYF	0	0	0	0	0	0.147476	0	0	0	0	0.373901	no
CASSHDRGVLSLCTCSATGINQAPLF	0	0	0	0	0.120294	0	0	0	0	0	0.373901	no
CASSLGLGAYF	0	0.250237	0	0	0	0	0	0	0	0	0.373901	no
CGADGAGPETLYF	1.12146	0	0	0	0	0	0	0	0	0	0.373901	no
CSAETGTSAGTLYF	5.10886	0	0	0	0	0	0	0	0	0	0.373901	no
CASSTDRGPGNTLYF	0	0.250237	0	0	0	0	0	0	0	0	0.373901	no
CRAPGHFNSYTSPRYF	0.124606	0	0	0	0	0	0	0	0	0	0.373901	no
CASSVLWGTEQF	0	0	0	0	0	0	0	0	0	0.124538	0.373901	no
CSSGTGGARNAEQF	0	0	0	0	0	0.73738	0	0	0	0	0.373901	no
CASSGDWGLYADQF	0	0.250237	0	0	0	0	0	0	0	0	0.373901	no
CAGGFRDWGGNYAEQF	0	4.37915	0	0	0	0	0	0	0	0	0.373901	no
CASSLEGNERLSF	2.11831	0	0	0	0	0	0	0	0	0	0.373901	no
CAWSLGLGEDTQYF	0	0	0.138099	0	0	0	0	0	0	0	0.373901	no
CASSDGWAYEQYF	4.61043	0	0	0	0	0	0	0	0	0	0.373901	no
CASSEGRADTGQLYF	0	0	0	0	0	0	0	0.132106	0	0	0.373901	no
CASSLSKVRNTEVF	0	0.375356	0	0	0	0	0	0	0	0	0.373901	no
CASFFNQDTQYF	0.249213	0	0	0	0	0	0	0	0	0	0.373901	no
CSAGKAGNTIYF	0	0	0	0	0	0	0.640363	0	0	0	0.373901	no
CASSDRTGYTQYF	0	0.125119	0	0	0	0	0	0	0	0	0.373901	no
CASSPGTANTGQLYF	0.249213	0	0	0	0	0	0	0	0	0	0.373901	no
CARRPGDWGEQYF	0	0	0	0	0	0	0.384218	0	0	0	0.373901	no
CASSDAGLGSQTTLYF	0.249213	0	0	0	0	0	0	0	0	0	0.373901	no
CARSLRGNYAEQF	0	0.250237	0	0	0	0	0	0	0	0	0.373901	no
CANMSQGRTLYCTCSAGPDTEVF	0	0	0	0	0	3.6869	0	0	0	0	0.373901	no
CASSFGTGGAVSPLYF	0	0	0	0	0.601471	0	0	0	0	0	0.373901	no
CSADLRYNSSLYF	1.61988	0	0	0	0	0	0	0	0	0	0.373901	no
CASSLDLKEDEQYF	0	0	0	0.308577	0	0	0	0	0	0	0.373901	no
CTYSATGDSAETLCF	0	0	0	0	0	0	0.128073	0	0	0	0.373901	no
CASSLTGAGAGHF	0	0	0	0	0.120294	0	0	0	0	0	0.373901	no
CPSSLSGSSYEQYF	0.124606	0	0	0	0	0	0	0	0	0	0.373901	no
CASSLRGPKTEVF	0	0	0	0	0	0	0	0	0.122106	0	0.373901	no
CASSDNQGTHEQCF	0	0	0.138099	0	0	0	0	0	0	0	0.373901	no
CASSDDGGTNERLF	0	0	0.276198	0	0	0	0	0	0	0	0.373901	no
CASRGQGPRKNTLYF	0	0	0	0	0	0	0	0	0.122106	0	0.373901	no
CASSQDEGRDAQHF	0.249213	0	0	0	0	0	0	0	0	0	0.373901	no
CASSFRDWGYTEQF	0	0	0	2.77719	0	0	0	0	0	0	0.373901	no
CASSRQGPHERLF	0	0	0	0	0.601471	0	0	0	0	0	0.373901	no
CSADEGNYTEQF	0	0	0	0	4.57118	0	0	0	0	0	0.373901	no
CARGGTGSNSDYTF	0	0	0	0	0	0.294952	0	0	0	0	0.373901	no
CASSLDRGDSGNTLYNCESGSF	0	0	0	0	0	0	0	0	0.122106	0	0.373901	no
CASGETGAANALYF	0	3.12796	0	0	0	0	0	0	0	0	0.373901	no
CSETVSTERF	0	0	0	0	0	0	0	0	0.122106	0	0.373901	no
CAWSRDSYNSPLYF	0	0	0.276198	0	0	0	0	0	0	0	0.373901	no
CGSGVLGGGAETLYF	0	0.500474	0	0	0	0	0	0	0	0	0.373901	no
CVSGDAAGNTEVF	0	7.75735	0	0	0	0	0	0	0	0	0.373901	no
CAGGEKNTEVF	0.623032	0	0	0	0	0	0	0	0	0	0.373901	no
CASGDRGNQAPPF	0.623032	0	0	0	0	0	0	0	0	0	0.373901	no
CARTEVLLITLSLCTCSARDWGF	0	0	0.138099	0	0	0	0	0	0	0	0.373901	no
CASSLTYTGQLYF	0	3.25308	0	0	0	0	0	0	0	0	0.373901	no
CSPGTGNTGQLYF	1703.87	0.125119	0	0	0	0	0.128073	0.132106	0	0	0.373927	no
CSAPGSSAEAQYF	0	0	0	0	0	0	0.128073	0	0	0	0.373901	no
CSADMTGDYEPYF	0	0.500474	0	0	0	0	0	0	0	0	0.373901	no
CASSEDWWSSQNTLYF	0	0	0	0	0	0.147476	0	0	0	0	0.373901	no
CACRKVEGRISPGICTCSAERQGTGQLYF	0	0	0	0	0	0	0	0	0.122106	0	0.373901	no
CAGSLSRGSSYEQYF	0	0.375356	0	0	0	0	0	0	0	0	0.373901	no
CASSGVWGGIYAEQF	0.249213	0	0	0	0	0	0	0	0	0	0.373901	no
CASSQDMRQGDERSF	0.249213	0	0	0	0	0	0	0	0	0	0.373901	no
CASGDYWGGQNTLYF	0	0.125119	0	0	0	0	0	0	0	0	0.373901	no
CTSGTGVYAEQF	0	0	0	0.771442	0	0	0	0	0	0	0.373901	no
CASSDISAKTLYF	0.373819	0	0	0	0	0	0	0	0	0	0.373901	no
CASSGQRGTGVF	0	0	0.138099	0	0	0	0	0	0	0	0.373901	no
CASGDADWGDSSYEQYF	0	0.250237	0	0	0	0	0	0	0	0	0.373901	no
CASSDGTNNSHLYF	0.124606	0	0	0	0	0	0	0	0	0	0.373901	no
CAWSRSNSDYTF	0.623032	0	0	0	0	0	0	0	0	0	0.373901	no
CASSGDRVGDTQYF	0	0.125119	0	0	0	0	0	0	0	0	0.373901	no
CSGGTKNTLSF	0	0	0	0	0	0	1.4088	0	0	0	0.373901	no
CAWSLWGPNSDYTF	0	1.3763	0	0	0	0	0	0	0	0	0.373901	no
CASSAGGAGNQAPLF	0.124606	0	0	0	0	0	0	0	0	0	0.373901	no
CSAGTQNSDVSF	0.124606	0	0	0	0	0	0	0	0	0	0.373901	no
CASGRPRDKYAEQF	0	0	0.138099	0	0	0	0	0	0	0	0.373901	no
CASSQGGTSEVF	0	0.87583	0	0	0	0	0	0	0	0	0.373901	no
CSAGGGQGGQNTLYF	0	2.62749	0	0	0	0	0	0	0	0	0.373901	no
CASSDWQGNTRQLYF	0.623032	0	0	0	0	0	0	0	0	0	0.373901	no
CSGGGAGDQYF	0	0	0.138099	0	0	0	0	0	0	0	0.373901	no
CSGTGRTCAETLYF	0	0	0	0	0	0	0	0	0	3.61161	0.373901	no
CASSRDQNTVVF	0	0	0	0	0	0	0	0.132106	0	0	0.373901	no
CASNQGRTLYCTCSATKDTQYF	0	0	0.138099	0	0	0	0	0	0	0	0.373901	no
CASSQPGNYAEQF	0	0.125119	0	0	0	0	0	0	0	0	0.373901	no
CSADDTEVF	0	0	0	0.154288	0	0	0	0	0	0	0.373901	no
CSADRTGDNERLSF	0.249213	0	0	0	0	0	0	0	0	0	0.373901	no
CASRTLNQDTQYFGPGTRLLYNCESGSF	0	0	0	0	0	0	0	0	0.122106	0	0.373901	no
CAWSARDRGRDEQYF	0	0.125119	0	0	0	0	0	0	0	0	0.373901	no
CASSRNSSGNTLYF	0	1.12607	0	0	0	0	0	0	0	0	0.373901	no
CASSWTGGHEQYF	0	0	0	1.08002	0	0	0	0	0	0	0.373901	no
CASRLGGKNTQYF	0	0.125119	0	0	0	0	0	0	0	0	0.373901	no
CGDSWDRADEQYF	0.623032	0	0	0	0	0	0	0	0	0	0.373901	no
CASSQGQGANTEGF	0	0	0.552396	0	0	0	0	0	0	0	0.373901	no
CSDSGSGNTLYF	0.124606	0	0	0	0	0	0	0	0	0	0.373901	no
CASSRTEDTQYFGPGTRLLYNCESGSF	0.124606	0	0	0	0	0	0	0	0	0	0.373901	no
CASGETGNYNSPLSF	0	0	0	0	0	0.147476	0	0	0	0	0.373901	no
CRDWGDEQYFSQNTLYF	0.249213	0	0	0	0	0	0	0	0	0	0.373901	no
CASSSGTGVQDTQYF	268.9	0	0	0	0	0	0	0	0	0	0.373901	no
CSAGGSNERLF	0.124606	0	0	0	0	0	0	0	0	0	0.373901	no
CTWSLGGSAETQYF	0	0	0	0	0	0.294952	0	0	0	0	0.373901	no
CANSLTRGHTEVF	0	0.250237	0	0	0	0	0	0	0	0	0.373901	no
CSVAGDSAETLYF	0	0	0	0	0	0	0.128073	0	0	0	0.373901	no
CVCPVCSADPFNSGNTLYF	0	0	0	0	0	0.147476	0	0	0	0	0.373901	no
CASGQDPGGSTRYF	0	0	0	0	0	0	0.128073	0	0	0	0.373901	no
CTSTLGRSHISQILYNNEPASF	0	0	0	0	0.120294	0	0	0	0	0	0.373901	no
CASSDAGGRGRDTQYF	0	0	0	0.154288	0	0	0	0	0	0	0.373901	no
CSGTGSAATLYF	0.124606	0	0	0	0	0	0	0	0	0	0.373901	no
CASSEGDSSGNTLYF	0	0	0	0.462865	0	0	0	0	0	0	0.373901	no
CASGQGRDNAETLYF	0	0	0.138099	0	0	0	0	0	0	0	0.373901	no
CASSLSGEGTLYF	0	0.625593	0	0	0	0	0	0	0	0	0.373901	no
CADEGSYNSPLYF	0	0	0	0	0	0	0	0	0	5.2306	0.373901	no
CSDWGDYAEQSF	0	0	0	0.154288	0	0	0	0	0	0	0.373901	no
CSPDVSNERLF	0.249213	0	0	0	0	0	0	0	0	0	0.373901	no
CSADHWNSGNTLYF	0	0.125119	0	0.154288	3373.77	0.147476	0.256145	0.396319	0	0.124538	0.373974	no
CSARTGGLNTEQLYF	0	0.625593	0	0	0	0	0	0	0	0	0.373901	no
CASSDEGRTLYCTCSAEQEQYF	0	0	0	0.154288	0	0	0	0	0	0	0.373901	no
CTAGAAWGQDTQYF	0	0.125119	0	0	0	0	0	0	0	0	0.373901	no
CASSARTRNSDYTF	0	0	0	0	0	0.73738	0	0	0	0	0.373901	no
CGAREAGRDSDYTF	0.124606	0	0	0	0	0	0	0	0	0	0.373901	no
CAGTEVLFIGGPRCTCSAGGASAETLYF	0	0	0	0	0	0.147476	0	0	0	0	0.373901	no
CRRLGGGNTLYF	0.124606	0	0	0	0	0	0	0	0	0	0.373901	no
CSADGAEQFYF	0	0	0	0	0	0	0.384218	0	0	0	0.373901	no
CSARGDQATYLCASSFSRDRETLYF	0.124606	0	0	0	0	0	0	0	0	0	0.373901	no
CRLGGETLCF	0	0	0	0	0	0	0	16.9096	0	0	0.373901	no
CSARDWGGNTLYF	0	0	0.138099	0	0	0	0	0	0	0	0.373901	no
CVSGDRDSGNTLYF	0	0.250237	0	0	0	0	0	0	0	0	0.373901	no
CAGSEGGGGGGGSSQNTLCF	0.124606	0	0	0	0	0	0	0	0	0	0.373901	no
CASGDGQGVAEQF	0.249213	0	0	0	0	0	0	0	0	0	0.373901	no
CGWSSGGSEQYF	0	0	0	0.154288	0	0	0	0	0	0	0.373901	no
CASRDAGSNTEVF	0.623032	0	0	0	0	0	0	0	0	0	0.373901	no
CASGDTGALSGNTLYF	338.057	0	0	0	0	0	0	0	0	0	0.373901	no
CASIDRAQDTQYF	0	0	0	0	1.32324	0	0	0	0	0	0.373901	no
CASSRLRDTQYF	0	0	0	963.223	0	0	0	0	0	0	0.373901	no
CASGPWGAEVF	0	0	0	0	0	0.147476	0	0	0	0	0.373901	no
CASSDAAGAEQVF	0.747638	0	0	0	0	0	0	0	0	0	0.373901	no
CASSDPGQTTGQLYF	0	0.125119	0	0	0	0	0	0	0	0	0.373901	no
CSASTGGGDTQYF	0.124606	0	0	0	0	0	0	0	0	0	0.373901	no
CASSQQEAYNAPLYF	0	0	0	0	0	0	0	0	0	0.124538	0.373901	no
CASSLRQGRNSPLYF	0.872244	0	0	0	0	0	0	0	0	0	0.373901	no
CASSQDGGVQYAQYF	0	0	0	0	0.120294	0	0	0	0	0	0.373901	no
CASSLEGTDERLF	0	0	0	2.00575	0	0	0	0	0	0	0.373901	no
CASSLGNERSF	0	2.75261	0	0	0	0	0	0	0	0	0.373901	no
CAGSPGVEQYF	1.86909	0	0	0	0	0	0	0	0	0	0.373901	no
CSLEIQSSEAGDSALYLYASSLSRGPNSDYTF	0	0.250237	0	0	0	0	0	0	0	0	0.373901	no
CRAEWGQTPLF	0	0	0	0	0	0	0	0.396319	0	0	0.373901	no
CVSSPRDWGEGEQYF	0	0.125119	0	0	0	0	0	0	0	0	0.373901	no
CSPEGGTEVF	0	0	0	0	0	0	0.256145	0	0	0	0.373901	no
CASGGRTGQNTLYF	0	0	0	0	0.240588	0	0	0	0	0	0.373901	no
CASGPSTNQDTQYF	0.249213	0	0	0	0	0	0	0	0	0	0.373901	no
CSETGPQDTQYFGPGTRLLCHGEPGSF	0	0	0	0	0	0	0	0.132106	0	0	0.373901	no
CSTRLGGPSAETLYF	0	0	0	0	0	0	0	0	0	26.7757	0.373901	no
CARSLWDIQDTPYF	0	0	0	0.154288	0	0	0	0	0	0	0.373901	no
CASSFKGDEQHF	0	0.500474	0	0	0	0	0	0	0	0	0.373901	no
CASSLLGLGGSQNTLYF	0	0	0	0	0.120294	0	0	0	0	0	0.373901	no
CSAVGNQVTQYF	0	0.500474	0	0	0	0	0	0	0	0	0.373901	no
CSARGQQAQHF	0	0	0	0	0	0	0	0	0.122106	0	0.373901	no
CAWSHWGNYAERF	0	0	0	0	0	0	0	20.6086	0	0	0.373901	no
CASSQDPAGGRVEQF	0	0	0	0	0	0	0.128073	0	0	0	0.373901	no
CIGTYNSPLYF	0	0.375356	0	0	0	0	0	0	0	0	0.373901	no
CAWSGAGANTGQLYF	0	1.25119	0	0	0	0	0	0	0	0	0.373901	no
CASSLGSYERLF	0.373819	0	0	0.154288	0	0	0	0	0	0	0.223582	no
CAWSLETGAGTEVLF	0.747638	0	0	0	0	0	0	0	0	0	0.373901	no
CSADVFNERLF	0.872244	0	0	0	0	0	0	0	0	0	0.373901	no
CASSQEDWGGPGKLYF	0	0	0	0	0.240588	0	0	0	0	0	0.373901	no
CASSFAGRGGTEVF	0.124606	0	0	0	0	0	0	0	0	0	0.373901	no
CSTDWGASEQYF	0	0	0	0	0	3.83438	0	0	0	0	0.373901	no
CASSQKQGRSNYTF	0	0	0	0	0.120294	0	0	0	0	0	0.373901	no
CASSQDGGGRGAEQF	0	0	0	0	0.120294	0	0	0	0	0	0.373901	no
CSWDSSGNTLYF	0	0	0	0.925731	0	0	0	0	0	0	0.373901	no
CASSLTPTEQF	0	0	0	0	0	0	0	0	0.122106	0	0.373901	no
CSGTGRTSVESLYF	0	0	0	0	0	0	0	0	0	0.124538	0.373901	no
CSAAPGSSYEQYF	0	0.250237	0	0	0	0	0	0	0	0	0.373901	no
CVWSLDNERLVF	0.124606	0	0	0	0	0	0	0	0	0	0.373901	no
CTCSATGGSERLF	0	0.625593	0	0	0	0	0	0	0	0	0.373901	no
CASSPGAGDYDNQAPLF	0	0	0	0	0	0	0	0	0	0.124538	0.373901	no
CARSFGTGDAGSPLYF	0	0	0	0	0.120294	0	0	0	0	0	0.373901	no
CTSSSRQKANTEVF	0.249213	0	0	0	0	0	0	0	0	0	0.373901	no
CASSQGGDELYF	0	0.125119	0	0	0	0	0	0	0	0	0.373901	no
CSALGNTEVF	0	0	0.276198	0	0	0	0	0	0	0	0.373901	no
CSADSGGNSAEQF	0	0	0	0	0	0	3.71411	0	0	0	0.373901	no
CASSLGGNSDYAF	0	0.625593	0	0	0	0	0	0	0	0	0.373901	no
CASSQVSRVQDTQYF	0	0	0	0	0	0	0	0	0.122106	0	0.373901	no
CATSLGDIFSNERLF	0	0	0	0	0	0.147476	0	0	0	0	0.373901	no
CSGGQTNTAVF	0	0	0	0	0	0	0	4.3595	0	0	0.373901	no
CASGDAETGGSQNTLYF	1.37067	0	0	0	0	0	0	0	0	0	0.373901	no
CASGDAGAETQYF	0	0	0	0	0	1.17981	0	0	0	0	0.373901	no
CASSSGEQYF	0.124606	0.625593	0	0	0	0	0	0	0	0	0.283811	no
CVSSLGVEQF	0	0	0	1.23431	0	0	0	0	0	0	0.373901	no
CASDDGWGANAGQLYF	0	0	0	0	0	0	0	0	0.122106	0	0.373901	no
CGARGTGVNYGNSLYF	0	0	0	0.154288	0	0	0	0	0	0	0.373901	no
CASSDTGGGAETLYF	0	0	0.138099	0	0	0	0	0	0	0	0.373901	no
CSTDDINTLYF	31.7746	0	0	0	0	0	0	0	0	0	0.373901	no
CASSLARANTEGF	0	0.125119	0	0	0	0	0	0	0	0	0.373901	no
CASSLTGDSPYAEQF	0	0	0	0	0	0.442428	0	0	0	0	0.373901	no
CSSSLGTANSDYTF	0	0	0	0	0.240588	0	0	0	0	0	0.373901	no
CTSSLSGTNTEVF	0	2.25213	0	0	0	0	0	0	0	0	0.373901	no
CSAVRGAGYF	0	0.250237	0	0	0	0	0	0	0	0	0.373901	no
CSAEGSQDAQYF	0	3.50332	0	0	0	0	0	0	0	0	0.373901	no
CAGAPICTCSAVWGDEQYF	0	0	0	0	0	0	0	0	0.366318	0	0.373901	no
CASSQAQTFSTERLF	0	0	0	0	0	0.147476	0	0	0	0	0.373901	no
CRRTANTGQLYF	0.124606	0	0	0	0	0	0	0	0	0	0.373901	no
CASSFRDRTDTGQLYF	0	0	0	0.154288	0	0	0	0	0	0	0.373901	no
CSPQGISNERLFFVGNPLRTAGGDTEVF	0	0	0.138099	0	0	0	0	0	0	0	0.373901	no
CASGETGGSPEVF	0	0	6.35256	0	0	0	0	0	0	0	0.373901	no
CSSDQSNSGNTLYF	0.249213	0	0	0	0	0	0	0	0	0	0.373901	no
CSVGQGNEQYF	0	0	0.138099	0	0.962353	0	0	0	0	0	0.30555	no
CASGEDTHYTEQF	0.249213	0	0	0	0	0	0	0	0	0	0.373901	no
CASSDALGSSTLYF	0.996851	0	0	0	0	0	0	0	0	0	0.373901	no
CASSPEGGGPQDTQYF	0	0.125119	0	0	0	0	0	0	0	0	0.373901	no
CSSGGDRNTGQLYF	0.124606	0	0	0	0	0	0	0	0	0	0.373901	no
CASSQDRGDDDPQYF	0	0	0.138099	0	0	0	0	0	0	0	0.373901	no
CSADIANTEVYF	0	0.250237	0	0	0	0	0	0	0	0	0.373901	no
CASSFSRDKETLYF	0.124606	0	0	0	0	0	0	0	0	0	0.373901	no
CASGDATGRGYAEQLF	0.249213	0	0	0	0	0	0	0	0	0	0.373901	no
CVNSLSRGPNSDYTF	0	0.125119	0	0	0	0	0	0	0	0	0.373901	no
CASSGDWGGDEQYF	0.249213	0	0	0	0	0	0	0	0	0	0.373901	no
CASGQDPAGGHVEQF	0	0	0	0	0	0	0.256145	0	0	0	0.373901	no
CASILDRDINERLF	0	0	0	0	0	0.294952	0	0	0	0	0.373901	no
CGSSHTGGANTGQLYF	0.124606	0	0	0	0	0	0	0	0	0	0.373901	no
CASSLSGSQAEQF	0	0	0	0.308577	0	0	0	0	0	0	0.373901	no
CASSDVRAANNQAPLF	0.373819	0	0	0	0	0	0	0	0	0	0.373901	no
CASSPPRSGNTLYF	0.872244	0	0	0	0	0	0	0	0	0	0.373901	no
CSAARETYAETLHF	0	0	0	0	0	0	0	0.132106	0	0	0.373901	no
CASSILSNQNTLYF	0	0	0	0	0	0	0	0.264212	0	0	0.373901	no
CASSLGQGLYDQYF	0	0	0	0.771442	0	0	0	0	0	0	0.373901	no
CASSAWGAIQNTLYF	0	0	0	0.154288	0	0	0	0	0	0	0.373901	no
CASSQVGLGAETLYF	0	0.125119	0	0	0	0	0	0	0	0	0.373901	no
CASGRTGGSGNPLYF	0	0.125119	0	0	0	0	0	0	0	0	0.373901	no
CASSFGGTSAVTLYF	0.124606	0	0	0	0	0	0	0	0	0	0.373901	no
CASSQATSAETLYF	0	1.75166	0	0	0	0	0	0	0	0	0.373901	no
CASGELRLQVANMSQGRTLYCTCSAEQEQYF	0	0	0	0.154288	0	0	0	0	0	0	0.373901	no
CASRRLGNNQAPLF	0	0.125119	0	0	0	0	0	0	0	0	0.373901	no
CSAGGQDTPHF	0.124606	0	0	0	0	0	0	0	0	0	0.373901	no
CSAGFSSERLLF	0.124606	0	0	0	0	0	0	0	0	0	0.373901	no
CASGDARGRNSTLYF	0	0.125119	0	0	0	0	0	0	0	0	0.373901	no
CSPQGSSNDRLF	0	0	0.138099	0	0	0	0	0	0	0	0.373901	no
CTSALGGGHGQLYF	0	0	0	0	0.120294	0	0	0	0	0	0.373901	no
CASSTLGQGNTGQRYF	0.996851	0	0	0	0	0	0	0	0	0	0.373901	no
CSAVSQNTVYF	0	0	0	0	0	0	2.56145	0	0	0	0.373901	no
CASRDAYEQYF	0	0	0	0	0	0.294952	0	0	0	0	0.373901	no
CSAEGQDTQAPLF	0	0	0	0	0.360882	0	0	0	0	0	0.373901	no
CASSYQGAPNERSF	0	0.250237	0	0	0	0	0	0	0	0	0.373901	no
CSADEGSYNNQAPLF	0	0	0	0	0	0	0	0	0	1.49446	0.373901	no
CAWSLGVGNTEVF	0	0	0.414297	0	0	0	0	0	0	0	0.373901	no
CASGAPGLSSYEQYF	0	0	0	0.154288	0	0	0	0	0	0	0.373901	no
CVSSRTGNYAEQF	0	0	0	0.308577	0	0	0	0	0	0	0.373901	no
CSAEDSNERLF	0.249213	0	0	0	0	0	0	0	0	0	0.373901	no
CVCCRICRLGGETLYF	0	0	0	0	0	0	0	0.132106	0	0	0.373901	no
CASSQDKTGGIEVF	0	0	0	0	0.120294	0	0	0	0	0	0.373901	no
CPHQSTRCFAVPDLHCTCSAVRDSNTGQLYF	0	0	0.138099	0	0	0	0	0	0	0	0.373901	no
CASSDMDRGGEQDF	0.124606	0	0	0	0	0	0	0	0	0	0.373901	no
CSEVVSNERLF	0	0	0	0	0	0	0	0	0.366318	0	0.373901	no
CASSFRGWGYAEQF	0	0	0	102.139	0	0	0	0	0	0	0.373901	no
CSAEEGVGTEVF	1226.38	0	0.138099	0	0	0	0	0.264212	0	0	0.373933	no
CASGGLGTDTEVF	0	0.625593	0	0	0	0	0	0	0	0	0.373901	no
CASSDAGAGSYEQYF	0.996851	0	0	0	0	0	0	0	0	0	0.373901	no
CASGDWGGQDTQYF	0.124606	0	0	0	0	0	0	0	0	0	0.373901	no
CASSQDGQGWEQHF	0	0.625593	0	0	0	0	0	0	0	0	0.373901	no
CSSSRTMTNTGQLYF	0	0	0	0.154288	0	0	0	0	0	0	0.373901	no
CASSGGQGHTEVF	0	0	0	0	0	0.147476	0	0	0	0	0.373901	no
CTSSQDGTAYNSPLYF	0	1.00095	0	0	0	0	0	0	0	0	0.373901	no
CASSVASANSDYTF	1.37067	0	0	0	0	0	0	0	0	0	0.373901	no
CASTTTTNSDYTF	0	0	0	0	0.120294	0	0	0	0	0	0.373901	no
CASSQSYQAPLF	2.99055	0	0	0	0	0	0	0	0	0	0.373901	no
CASGRDSSYNSPLYF	0	0	0	0	0	0.442428	0	0	0	0	0.373901	no
CRAPGGATEVF	0	0	0	0	0.120294	0	0	0	0	0	0.373901	no
CASSVGIGYEQYF	0.124606	0	0	0	0	0	0	0	0	0	0.373901	no
CASSQSRDHYAEQFFGESCPWSEELLSKPPQCTCSDRFSNERLF	0	0	0	0	0	0	0	0.132106	0	0	0.373901	no
CASSDAAENCDYTF	0	0	0	0	0.120294	0	0	0	0	0	0.373901	no
CASPGWGPSAEMLYF	0	0.625593	0	0	0	0	0	0	0	0	0.373901	no
CASSLRDRANSPLYF	0.124606	0	0	0	0	0	0	0	0	0	0.373901	no
CIASGTGAEQF	0	0	0	0	0	0	0.51229	0	0	0	0.373901	no
CASSQDRLGGTQNTLYF	0	0	0	0	0	0	0	0.264212	0	0	0.373901	no
CSAEGQGRTHEQYF	0.996851	0	0	0	0	0	0	0	0	0	0.373901	no
CAGSAATDSGNTLSF	0	0	0	0	0	0	0	0.132106	0	0	0.373901	no
CAWSPGTGNTLYF	0	0	2.90008	0	0	0	0	0	0	0	0.373901	no
CASSLGQGVTNERLF	0	0.375356	0	0	0	0	0	0	0	0	0.373901	no
CSAARGAGNSPLYF	0	0	0	0	0	0	4.99483	0	0	0	0.373901	no
CAGSQGKTGVTEVF	0	0	0	0	0.120294	0	0	0	0	0	0.373901	no
CASSLEDRANSNCTF	0	0.125119	0	0	0	0	0	0	0	0	0.373901	no
CRANSYNSLLYF	0	0	0	0	0	0	0	0.264212	0	0	0.373901	no
CASSFWVDTQCF	0	0	0	0	0	0.442428	0	0	0	0	0.373901	no
CARSPSLGGRSAETLYF	0	0	0.828595	0	0	0	0	0	0	0	0.373901	no
CSAPGTYNNQAPLF	0	0	0.966694	0	0	0	0	0	0	0	0.373901	no
CASGDARGPENSDYTF	0	0	0.552396	0	0	0	0	0	0	0	0.373901	no
CASSPGAGVNTEVF	0	1.12607	0	0	0	0	0	0	0	0	0.373901	no
CASSQAFTKVELPGAGACTCSAGDRFYGNTLYF	0	0	0.138099	0	0	0	0	0	0	0	0.373901	no
CSTVANTGRLYF	0	0	0	0	0.240588	0	0	0	0	0	0.373901	no
CSAGQAPNERLF	0	0	0	0	0	0.294952	0	0	0	0	0.373901	no
CSSGTGRARYAEQF	0	0	0	0	0	1.91719	0	0	0	0	0.373901	no
CAWSDWGNYAEQF	0	0	0	0	0	0	0	1.45317	0	0	0.373901	no
CASSYREETLYF	0	0	0	0	0	0.147476	0	0	0	0	0.373901	no
CASSHSEGDTEVF	0	0	0	0	0	0.294952	0	0	0	0	0.373901	no
CASSLARVNERLF	0	0.125119	0	0	0	0	0	0	0	0	0.373901	no
CSADPDRREVCF	0	0.125119	0	0	0	0	0	0	0	0	0.373901	no
CASSDTGTWNTGQLYF	0	0	0	0.154288	0	0	0	0	0	0	0.373901	no
CATSPGLRQDTQYF	0	0.125119	0	0	0	0	0	0	0	0	0.373901	no
CASGVGTNYAEQF	0	0	0	0	0	0.442428	0	0	0	0	0.373901	no
CASSQNTAFLHYPLLHCTCSADRQGRNSPLYF	0	0	0	0	0	0	0.128073	0	0	0	0.373901	no
CSGTGGGSAETLYF	0.249213	0	0	0	0	0.294952	0	0	0	0	0.908708	no
CASSQNWGAYAEQF	0	0	0	5.24581	0	0	0	0	0	0	0.373901	no
CASSQDPGGTRSSYAQYF	0	0	0.138099	0	0	0	0	0	0	0	0.373901	no
CASSATNSDYTF	0	0.125119	0	0	0	0	0	0	1.09895	0	0.427157	no
CASNPGHNNQAPPF	1.9937	0	0	0	0	0	0	0	0	0	0.373901	no
CASRVISYEQYF	0	0	0	0	0	0	0	0	0	0.622691	0.373901	no
CASSPGLRQDTQHF	0	0.125119	0	0	0	0	0	0	0	0	0.373901	no
CASSPDRYNSPLYF	0	0.125119	0	0	0.120294	0	0	0	0	0	0.177918	no
CASSQDPGAEPLYF	0	0.375356	0	0	0	0	0	0	0	0	0.373901	no
CASGLEGGSYEQYF	0	0.125119	0	0	0	0	0	0	0	0	0.373901	no
CASSQDWAQDTQYFGPGTQILYNCESGSF	0	0	0	0	0	0.147476	0	0	0	0	0.373901	no
CASSLWGTSVETLYF	0	0	0	1.85146	0	0	0	0	0	0	0.373901	no
CASSFSQGGEQHF	0.872244	0	0	0	0	0	0	0	0	0	0.373901	no
CASSPGQGNSYEQYF	0	0	0	0	0	0	0.384218	0	0	0	0.373901	no
CASSDPDRGREQYF	0	0.125119	0	0	0	0	0	0	0	0	0.373901	no
CASRDRGGQDTKYF	0	0	1.10479	0	0	0	0	0	0	0	0.373901	no
CASGGTGASDYAF	1.24606	0	0	0	0	0	0	0	0	0	0.373901	no
CASGLGTGGSNERLF	0	0	0	0.154288	0	0	0	0	0	0	0.373901	no
CASSDSGSNSPLYF	0.124606	0	0	0	0	0	0	0	0	0	0.373901	no
CRETVSHARLF	0	0	0	0	0	0	0	0	0.244212	0	0.373901	no
CASRGIIYAEQF	0.124606	0	0	0	0	0	0	0	0	0	0.373901	no
CSADRANTWQLYF	0	0	0	0	0	0	2.68952	0	0	0	0.373901	no
CASRGQNYDEQF	0	0	0	0	0	0	0.51229	0	0	0	0.373901	no
CASSLETFYAEQLF	0	0	0	0	2.28559	0	0	0	0	0	0.373901	no
CAGSRSGQNYAEQF	0.249213	0	0	0	0	0	0	0	0	0	0.373901	no
CSAPNCWQDPHYF	0	0	0	0	0	0	0	0	0.122106	0	0.373901	no
CASSDWGSQNTSYF	0	2.37725	0	0	0	0	0	0	0	0	0.373901	no
CSAPRDRNTEAF	0	0	0	0	0	0	0.128073	0	0	0	0.373901	no
CTIEIQSSKLTDSAVYFRAGSQSGTQREYF	0	0	0	0	0	0	0	0.132106	0	0	0.373901	no
CASSPRTGGPNQDTQDLHCRCSTRFCTCSGRNYEQYF	0	0.250237	0	0	0	0	0	0	0	0	0.373901	no
CASSQSGTQRVYF	0	0	0	0	0	0	0	1.18896	0	0	0.373901	no
CASSDARGPSAEKLYF	0	0	0	0	0.360882	0	0	0	0	0	0.373901	no
CASFIWYYEQYF	0	0	0	0	0	0	0	0	0	0.249076	0.373901	no
CASGGPGQGAEQPQSRLHCRCRDNYEQYF	0	0	0	0	0	0	0	0.132106	0	0	0.373901	no
CTYSADEGNYAEQF	0	0	0	0	7.57853	0	0	0	0	0	0.373901	no
CVGGTGVYAEQF	0	0	0	0.154288	0	0	0	0	0	0	0.373901	no
CASSLSQNTLYF	4.61043	4.25403	0	10.8002	0	0	0	0	0	0	0.11837	no
CASSPTGGGSSERLF	0	0	0	0	0	1.47476	0	0	0	0	0.373901	no
CASGGGLGGCEQYF	0	0	1.79529	0	0	0	0	0	0	0	0.373901	no
CASSPGTGNTEVVF	0	0	0	0	0	0	0	3.17055	0	0	0.373901	no
CSAPGGEVTETLYF	0	0	0	0	0	0.147476	0	0	0	0	0.373901	no
CTSGFRDWGGNYAEQF	0	0.750711	0	0	0	0	0	0	0	0	0.373901	no
CASGDWDRGGSQNTLYF	0	0.750711	0	0	0	0	0	0	0	0	0.373901	no
CTRGAAGNSPLYF	0	0	0.138099	0	0	0	0	0	0	0	0.373901	no
CSAWTGHSDYTF	2.24291	0	0	0	0	0	0	0	0	0	0.373901	no
CVPCPCTAGAVWGDEQYF	0	0	0	0	0	0	0	0	0.122106	0	0.373901	no
CSTDPGQGNSDYTF	1.61988	0	0	0	0	0	0	0	0	0	0.373901	no
CAWSPGQGAGNNQAPLF	0	0	0.276198	0	0	0	0	0	0	0	0.373901	no
CSKDAEQFFGPGGLNTGQLYF	0	0.125119	0	0	0	0	0	0	0	0	0.373901	no
CASSPGQGHQAPLF	0.249213	0	0	0	0	0	0	0	0	0	0.373901	no
CQGTGGAGAPLYF	0	0	0	0	0.120294	0	0	0	0	0	0.373901	no
CSADHGKERLF	0	0	0	0	0	0	0	0.132106	0	0	0.373901	no
CSAFRDPGGDTQYF	0	0	0	0	3.84941	0	0	0	0	0	0.373901	no
CASGRLGGQDTEYF	0.124606	0	0	0	0	0	0	0	0	0	0.373901	no
CSAVQNERLFFGHGKFCPGCTAGADPFNSGNTLYF	0	0	0	0	0	0.147476	0	0	0	0	0.373901	no
CSAGGQDAQYFGPGTRLLYNCESGSF	0.124606	0	0	0	0	0	0	0	0	0	0.373901	no
CTWSRQGERLF	0.498425	0	0	0	0	0	0	0	0	0	0.373901	no
CSADQTGASEQYF	0	0	0	0	0.120294	0	0	0	0	0	0.373901	no
CSFNNQDTQYF	0	0.125119	0	0	0	0	0	0	0	0	0.373901	no
CASAPNSYNAPLYF	0.124606	0	0	0	0	0	0	0	0	0	0.373901	no
CALTGGTNESLF	0	0	0	0	0	0.73738	0	0	0	0	0.373901	no
CASSWDRGYAQQF	0.249213	0	0	0	0	0	0	0	0	0	0.373901	no
CASGDGGVYAEQF	0	0	0	0	0	0	0	0	0.122106	0	0.373901	no
CSIGSGAETLYF	0	0	0	0	0.120294	0	0	0	0	0	0.373901	no
CSMGQGNSAETLHF	0	0	0	0	0.120294	0	0	0	0	0	0.373901	no
CTGSLVLGGLGAETLYF	0.124606	0	0	0	0	0	0	0	0	0	0.373901	no
CANMSQGRTLYCTCSVAISNERLF	0.249213	0	0	0	0	0	0	0	0	0	0.373901	no
CASSQDLTGARAETLYF	5.23347	0	0	0	0	0	0	0	0	0	0.373901	no
CASSSDRGVSNERF	0	1.12607	0	0	0	0	0	0	0	0	0.373901	no
CASSDGQGAWDTEVF	0.747638	0	0	0	0	0	0	0	0	0	0.373901	no
CASSLSEGQSNERLF	0	0	0	2.46862	0	0	0	0	0	0	0.373901	no
CASGRRGGQDTQYF	0.124606	0	0	0	0	0	0	0	0	0	0.373901	no
CSAGQGRENTEVF	0	1.3763	0	0	0	0	0	0	0	0	0.373901	no
CSAGQRSNERLF	0.124606	0	0	0	3.36824	0	0	0	0	0	0.354607	no
CASSGGQEANSPLYF	0	0	0	0	0	0	0	3.56687	0	0	0.373901	no
CPSSGDTQAQYF	0	0	0	0	0	0	0.128073	0	0	0	0.373901	no
CAWSLWRNSDSTF	0.249213	0	0	0	0	0	0	0	0	0	0.373901	no
CASSAGPSGNPLYF	0.373819	0	0	0	0	0	0	0	0	0	0.373901	no
CAWSAGGAYEQYF	0	0	0	0.925731	0	0	0	0	0	0	0.373901	no
CASNDAQVAETLYF	0	0	0	0	0.360882	0	0	0	0	0	0.373901	no
CSAAGGAGNPPLYF	0	0	0	0	0	0	6.78785	0	0	0	0.373901	no
CANRRDISAETLYF	0.498425	0	0	0	0	0	0	0	0	0	0.373901	no
CSADNRAPAETLYF	0	0	0	0	1.32324	0	0	0	0	0	0.373901	no
CASSDDWGSTLYF	0	0	0.276198	0	0	0	0	0	0	0	0.373901	no
CTIEIQPSNLTDSAVYFRAGRQTGSETLYF	0	0	0	0	0	0	0	0	0.122106	0	0.373901	no
CASSVGHSVDERLF	0	0.125119	0	0	0	0	0	0	0	0	0.373901	no
CASSFISANTEIF	0	0.125119	0	0	0	0	0	0	0	0	0.373901	no
CSAETGTSAETLYF	807.823	0	0	0	0.120294	0	0	0	0.122106	0	0.373886	no
CSGTWGDTQYF	0	0.250237	0	0	0	0	0	0	0	0	0.373901	no
CSAERENTAVF	0	0.125119	0	0	0	0	0	0	0	0	0.373901	no
CASSDRTGYEQYF	0.373819	0	0	0	0.240588	0	0	0	0	0	0.19093	no
CDSSGNNQDTQYF	0	0	0	0	0	0	0	0.132106	0	0	0.373901	no
CASSWAGTGISLCF	0	0	0	0	0.120294	0	0	0	0	0	0.373901	no
CRNPTGGPNQDTQYF	0	0	0	0	1.68412	0	0	0	0	0	0.373901	no
CSAEQGHNTLYF	0	0.125119	0	0	0	0	0	0	0	0	0.373901	no
CASSSPGGNYAEQLF	2.49213	0	0	0	0	0	0	0	0	0	0.373901	no
CASNRLGGTEQF	0	0	0	0	0	0	0	0	0	0.124538	0.373901	no
CASSQDLRGDAEQF	0	0	0	0	0	1.47476	0	0	0	0	0.373901	no
CASGSTVHRSVDGHCTCSADQGRQNTLYF	0	0	0.138099	0	0	0	0	0	0	0	0.373901	no
CASRESGGGQNTLYF	0	0	0	0	0	0	0	21.5333	0	0	0.373901	no
CSAPTVASNTEVF	0	0.125119	0	0	0	0	0	0	0	0	0.373901	no
CAWSPGQGAGKTLYF	0	0	1.65719	0	0	0	0	0	0	0	0.373901	no
CASGVQTNSGYTF	0	0.750711	0	0	0	0	0	0	0	0	0.373901	no
CSADGLEGYAEQF	0	0	3.59058	0	0	0	0	0	0	0	0.373901	no
CTSRRQGASYNSPLYF	0	0	0.690496	0	0	0	0	0	0	0	0.373901	no
CASGRTNYAEQF	0.747638	0	0	0	0	0	0	0	0	0	0.373901	no
CASSLEGGQDTEVVF	0	0	0.138099	0	0	0	0	0	0	0	0.373901	no
CASSPSNTDVF	0	0	0	0	0	0	0	0	0.854743	0	0.373901	no
CASSGGTGYAQYF	1.12146	0	0	0	0	0	0	0	0	0	0.373901	no
CTSPAGTGAGNTLYF	0	0.125119	0	0	0	0	0	0	0	0	0.373901	no
CASSPRKDTQYF	0	1.75166	0	0	0	0	0	0	0	0	0.373901	no
CRDRFSNEGLF	0	0	0	0	0	0	0	0.132106	0	0	0.373901	no
CDSSQARSQNTLYF	0	0	0	0	0	0	0	1.05685	0	0	0.373901	no
CASNQDLSYNNQAPLF	0	0	0	9.87446	0	0	0	0	0	0	0.373901	no
CASSPDWGSYAEQF	0	1.75166	0	0	0	0	0	0	0	0	0.373901	no
CASSERRSAETLYF	0	0	0	0.154288	0	0	0	0	0	0	0.373901	no
CASGVGGRGYAEQF	0.124606	0	0	0	0	0	0	0	0	0	0.373901	no
CASGAPLQDTQYF	0.124606	0	0	0	0	0	0	0	0	0	0.373901	no
CAGSSGTGGDTQYF	0	1.12607	0	0	0	0	0	0	0	0	0.373901	no
CSAVSGGKAEQF	0	0	0.138099	0	0	0	0	0	0	0	0.373901	no
CARRGRGNTEVF	0.249213	0	0	0	0	0	0	0	0	0	0.373901	no
CASSLDRSSTEVF	0	0	0	0	0.240588	0	0	0	0	0	0.373901	no
CSADGEENSPLYF	0	0	0	0	0	0	0.128073	0	0	0	0.373901	no
CSSRRGLSYEQYF	0	0	0.138099	0	0	0	0	0	0	0	0.373901	no
CSATGTDTLCF	0	2.87773	0	0	0	0	0	0	0	0	0.373901	no
CASSLGLGGHVEQF	0	0	1.65719	0	0	0	0	0	0	0	0.373901	no
CASSRYWGSSYEQYF	0	0.125119	0	0	0	0	0	0	0	0	0.373901	no
CRQGTYEQYFGPLAAGAGQGQDTQYF	0	0	0	0	0	0.147476	0	0	0	0	0.373901	no
CASSPRNNNQAQHF	0	0	0	0	0	0	0	0.132106	0	0	0.373901	no
CANSDAKGEGQNTLYF	0	0	0.138099	0	0	0	0	0	0	0	0.373901	no
CASSDVRAEQYF	0.124606	0	0	0	0	0	0	0	0	0	0.373901	no
CASGGQGRQDTQYF	0	3.50332	0	0	0	0	0	0	0	0	0.373901	no
CSAGTATGQPYF	0	0	0.138099	0	0	0	0	0	0	0	0.373901	no
CSAVSRDTQYF	0	0	0	0.154288	0	0	0	0	0	0	0.373901	no
CASSGAGESERF	0	0	0	0.154288	0	0	0	0	0	0	0.373901	no
CADADNERLF	0	0	0	0.462865	0	0	0	0	0	0	0.373901	no
CAFLYF	0	0	0	0	0	0	0	0	0.122106	0	0.373901	no
CASGEPSAETLYF	0	0.375356	0	0	0	0	0	0	0	0	0.373901	no
CSALGDNHAEQF	0	0	0	0	0	6.48895	0	0	0	0	0.373901	no
CGADSSGNTLCF	0	0	0	0	0	0	0	0	0.122106	0	0.373901	no
CVSSLGNSNERLLF	0	0.125119	0	0	0	0	0	0	0	0	0.373901	no
CASGETGSYERYF	0.124606	0	0	0	0	0	0	0	0	0	0.373901	no
CSAGRANTGQLYF	0	0	0	0	0	0	26.7672	0	0	0	0.373901	no
CASSLHRAFSNERLF	0	0	0	0.154288	0	0	0	0	0	0	0.373901	no
CTGSAPHWGQDTQCF	0	0	0	0	0	0	0	0	0.61053	0	0.373901	no
CASRFYETNSPLYF	0	0.250237	0	0	0	0	0	0	0	0	0.373901	no
CIAARETYAEQSF	0	0	0	0	0	0	0	0.132106	0	0	0.373901	no
CASGDAGGVQF	0	0	0	0.308577	0	0	0	0	0	0	0.373901	no
CASSPTNYDDQYF	0	0	0	0.154288	0	0	0	0	0	0	0.373901	no
CAISQAGGWEQYF	0	0	0	0	0	0	0	0	0.122106	0	0.373901	no
CSADDSSYEQNF	0.249213	0	0	0	0	0	0	0	0	0	0.373901	no
CASSDGENTEVF	0	0	0	0	0.120294	0	0	0	0	0	0.373901	no
CASSPGPSQKTLYF	0.249213	0	0	0	0	0	0	0	0	0	0.373901	no
CFSHLHCTCSASAEQF	0	0	0	0.154288	0	0	0	0	0	0	0.373901	no
CASSDRGGGQNTLSF	0.498425	0	0	0	0	0	0	0	0	0	0.373901	no
CSSVSEETLYF	0	0	0	0	0	0	0	0.660531	0	0	0.373901	no
CDSSQQDNQYF	0	0	0	0	0	0	0	0	0	0.124538	0.373901	no
CSARGGAPQYF	0	0	0	0	0	0	0	0	0.122106	0	0.373901	no
CASSLGAYEQLYF	0	0	0	0	0	0	0.128073	0	0	0	0.373901	no
CASGDRDRENNQAPLF	0	0	0	0	0	0.147476	0	0	0	0	0.373901	no
CSADAEGERLF	0	0	0	0	0	0	0.128073	0	0	0	0.373901	no
CNGTGSAETLYF	0.623032	0	0	0	0	0	0	0	0	0	0.373901	no
CSADRDKYTLYF	0	0.125119	0	0	0	0	0	0	0	0	0.373901	no
CASSGLEGQDTQYF	0.373819	0	0	0	0	0	0	0	0	0	0.373901	no
CSGDWGQDNQYF	0.249213	0	0	0	0	0	0	0	0	0	0.373901	no
CANMSQGRTLYCTCSPGGAHTGQLYF	0	0	0.138099	0	0	0	0	0	0	0	0.373901	no
CASSLWDIEDTQYF	0	0	0	0.154288	0	0	0	0	0	0	0.373901	no
CASSQERVGGYEQYF	0	0.625593	0	0	0	0	0	0	0	0	0.373901	no
CSVGTGCNAETLYF	0	0.125119	0	0	0	0	0	0	0	0	0.373901	no
CASSFGMGGSQNTLYF	0	0.125119	0	0	0	0	0	0	0	0	0.373901	no
CASSDARGGDTQYF	0.996851	0	0	0	0	0	0	0	0	0	0.373901	no
CASTTANSDHTF	0	0	0	0	0	0.147476	0	0	0	0	0.373901	no
CASSHRPNPDYTF	0	0	0	0	0	0.147476	0	0	0	0	0.373901	no
CGAAGGEQYF	0	0	0	0	0.120294	0	0	0	0	0	0.373901	no
CASSLGTTNYDYTF	0	0	0	0.154288	0	0	0	0	0	0	0.373901	no
CTGRLGGEEQYF	0	0	0	0	0	0	0	0.132106	0	0	0.373901	no
CGAGEGSDYTF	0	1.25119	0	0	0	0	0	0	0	0	0.373901	no
CASSDRPNSDYTFGSGTRLLVIEDGESCPWSEELLSIF	0	0	0	0	0	0.147476	0	0	0	0	0.373901	no
CASSSWGERGDTRYF	0	0.375356	0	0	0	0	0	0	0	0	0.373901	no
CASSPGNWGEQYF	0	0	0	0	0	0	56.9923	0	0	0	0.373901	no
CSEGLGDNYAEQFFGPGTGGYEQYF	0	0	0	0	0.120294	0	0	0	0	0	0.373901	no
CAGSDAARNYAEQF	0	0	2.34768	0	0	0	0	0	0	0	0.373901	no
CSARENTGQLYF	0	0.125119	0	0	0	0	0	0	0	0	0.373901	no
CSGLGGGDTQYFGPGTRLLYNNEPASF	0	0	0	0	0	0	0	0.396319	0	0	0.373901	no
CGSSDVGEVF	0	0	0	0	0.360882	0	0	0	0	0	0.373901	no
CSGDAGTLYEQYF	0.249213	0	0	0	0	0	0	0	0	0	0.373901	no
CSAGDSGAETLHF	0	0	0	0	0	0	0	0	0.122106	0	0.373901	no
CSADQGAPLF	0	0	0	0	30.0735	0	0	9.11533	0	0	0.535964	no
CASSSETGVNERLF	0	0	0	1.23431	0	0	0	0	0	0	0.373901	no
CASSLKTTSNTAVF	0	0	0	0	1.44353	0	0	0	0	0	0.373901	no
CASSHPTGGENTSYF	0.249213	0	0	0	0	0	0	0	0	0	0.373901	no
CASSDTGGHEQYF	0	0	0	0.925731	0	0	0	0	0	0	0.373901	no
CASGGGQNTEVLF	0	0.125119	0	0	0	0	0	0	0	0	0.373901	no
CASSLYQINYAEQLF	0	0.250237	0	0	0	0	0	0	0	0	0.373901	no
CASSQGRGGERLF	0	1.3763	0	0	0	0	0	0	0	0	0.373901	no
CSPGQSNTGVLF	0	0	0.138099	0	0	0	0	0	0	0	0.373901	no
CASGDVGEAF	0	0	0	0	0.120294	0	0	0	0	0	0.373901	no
CASSLRGGDTQYF	0.249213	0	0	0	0	0	0	0	0	0	0.373901	no
CASSTGGNSDYTF	0	0	0	0.308577	0	0	0	0	0	0	0.373901	no
CSARHERLF	0	0.375356	0	0	0	0	0	0	0	0	0.373901	no
CAWSHRGRDSDYTF	0	0	0	0.308577	0	0	0	0	0	0	0.373901	no
CASRAGTGGALEPYF	0.124606	0	0	0	0	0	0	0	0	0	0.373901	no
CSAESGQLYF	0	0.87583	0	0	0	0	0	0	0	0	0.373901	no
CASSDQGASAEQF	0.124606	0	0	0	0	0	0	0	0	0	0.373901	no
CASSGLGASQNTLYF	0	0	0	0	0	0.589904	0	0	0	0	0.373901	no
CASGLVGTDTEVF	0	0	0	0	151.691	0	0	0	0	0	0.373901	no
CTWSDRQGNTEVF	0	0	0	0	0	0	0.768436	0	0	0	0.373901	no
CSSSLGGNGNTLYF	0	0	0	0	0	0	0	0	0.122106	0	0.373901	no
CGAFGTNNQAQHF	0	2.25213	0	0	0	0	0	0	0	0	0.373901	no
CSADDSSYELYF	0.373819	0	0	0	0	0	0	0	0	0	0.373901	no
CASSSGQGLYEQYF	0.124606	0	0	3.24006	0	0	0	0	0	0	0.353867	no
CASGAATEHF	0	0	0	0	0	0.294952	0	0	0	0	0.373901	no
CSADGSANTGQLYF	0	0	1.38099	0	0	0	0	0	0	0	0.373901	no
CGAKNWGDQDTQYF	0	0	0	0.308577	0	0	0	0	0	0	0.373901	no
CANMSQGRTLYCTCSARGDQDTQYF	1.24606	0	0	0	0	0	0	0	0	0	0.373901	no
CASSPGHANTDYTF	0.124606	0	0	0	0	0	0	0	0	0	0.373901	no
CSAPGAANPGQLYF	0	0	0	0	0	0	0	0	0.122106	0	0.373901	no
CASSTGTSSYEQNF	0	0.250237	0	0	0	0	0	0	0	0	0.373901	no
CASSDRGCAGNTLYF	0	0	0	1.23431	0	0	0	0	0	0	0.373901	no
CASSRLGGANTEQPYF	0	0	0	0	0	0	0	0	0.122106	0	0.373901	no
CASSRGTGAQQF	51.3378	0	0	0	0	0	0	0	0	0	0.373901	no
CSADWSAYELNF	0	0	0	0	0	0	0	0	0.122106	0	0.373901	no
CASSAGTGYYEQYF	0	0	0	0	0	0	0.384218	0	0	0	0.373901	no
CAGGDAPGSYEQYF	0	1.12607	0	0	0	0	0	0	0	0	0.373901	no
CASSEDRSNTEVF	0.124606	0	0	0	0	0	0	0	0	0	0.373901	no
CSADGTLNQDTHLHCRCSTRFCTCSKDAEQF	0	0.125119	0	0	0	0	0	0	0	0	0.373901	no
CSAWGQVTQYF	0	0	0	0	0	0.147476	0	0	0	0	0.373901	no
CAWRSGRGGGAETLYF	0.124606	0	0	0	0	0	0	0	0	0	0.373901	no
CASSRGYSLLYF	0	0.250237	0	0	0	0	0	0	0	0	0.373901	no
[truncated: 377,995+ more rows]
