# Supplementary material for: The T Cell Receptor Immune Repertoire Protects the Liver From Reconsitution
Source: Front Immunol. 2020 Dec 18;11:584979. doi: 10.3389/fimmu.2020.584979 (PMC7775400; doi:10.3389/fimmu.2020.584979)
Supplement: Supplementary file 13 [file Table_12.xlsx]

## Sheet: Ctrl
Ctrl group
Ctrl-1						Ctrl-2						Ctrl-3						Ctrl-4						Ctrl-5
V Gene	J Gene	CDR3 AA	Reads	Percentage(%)		V Gene	J Gene	CDR3 AA	Reads	Percentage(%)		V Gene	J Gene	CDR3 AA	Reads	Percentage(%)		V Gene	J Gene	CDR3 AA	Reads	Percentage(%)		V Gene	J Gene	CDR3 AA	Reads	Percentage(%)
TRBV1	TRBJ1-6	CSAPGHFNSYNSPLYF	314239	4.25928		TRBV1	TRBJ2-4	CSAGLGEQNTLYF	637856	8.34043		TRBV1	TRBJ2-2	CSAVRDSNTGQLYF	195648	2.79398		TRBV1	TRBJ1-4	CSADANNERLF	998789	16.1092		TRBV5	TRBJ1-1	CASSLKTNSNTEVF	553195	6.83123
TRBV29	TRBJ1-1	CASSLTGPSNTEVF	251645	3.41087		TRBV13-3	TRBJ2-7	CASSDASQGYEQYF	452410	5.91559		TRBV13-2	TRBJ1-1	CASGETGGSTEVF	194640	2.77958		TRBV13-1	TRBJ1-6	CASSDAGDSPLYF	701231	11.31		TRBV15	TRBJ1-1	CASSLDRANTEVF	299416	3.69739
TRBV5	TRBJ2-3	CASSQDLTGASAETLYF	106050	1.43743		TRBV1	TRBJ2-3	CSVGTGSSAETLYF	87656	1.14617		TRBV1	TRBJ2-4	CSADQGRQNTLYF	166400	2.3763		TRBV12-1	TRBJ2-7	CASSLDKSYEQYF	216107	3.48554		TRBV1	TRBJ2-3	CSVGQGNSAETLYF	279624	3.45299
TRBV13-3	TRBJ2-7	CASSGGTGYEQYF	43482	0.589367		TRBV5	TRBJ2-5	CASSQDPGVQDTQYF	50466	0.65988		TRBV13-2	TRBJ1-4	CASGDASNERLF	126026	1.79973		TRBV12-1	TRBJ2-7	CASSPDKTYEQYF	198665	3.20422		TRBV1	TRBJ2-4	CSGDNSQNTLYF	257455	3.17923
TRBV1	TRBJ2-2	CSADRGANTGQLYF	29064	0.393942		TRBV1	TRBJ1-1	CSAERGNTEVF	49583	0.648334		TRBV1	TRBJ1-6	CSADRDSYNSPLYF	125465	1.79172		TRBV15	TRBJ2-1	CASSPWDWGYAEQF	134301	2.16611		TRBV13-2	TRBJ1-2	CASGDRADYTF	102987	1.27175
TRBV1	TRBJ2-7	CSAWGGYEQYF	26081	0.353509		TRBV1	TRBJ1-3	CSAGTASGNTLYF	45130	0.590108		TRBV13-2	TRBJ2-7	CASGERQGNEQYF	115681	1.652		TRBV1	TRBJ1-1	CSADGRNTEVF	96878	1.56252		TRBV31	TRBJ2-1	CAWSLTGGVYAEQF	99696	1.23111
TRBV1	TRBJ2-5	CSGDWGQDTQYF	25806	0.349782		TRBV1	TRBJ2-7	CSPGQIIYEQYF	39462	0.515995		TRBV1	TRBJ1-1	CSAAQGNTEVF	97130	1.38708		TRBV1	TRBJ2-3	CSADRAGGAETLYF	82908	1.3372		TRBV1	TRBJ1-5	CSAGTGVNQAPLF	96649	1.19349
TRBV1	TRBJ2-4	CSADGGARGQNTLYF	24545	0.33269		TRBV1	TRBJ2-1	CSRDRYYAEQF	39454	0.51589		TRBV1	TRBJ2-4	CSADLGRQNTLYF	71430	1.02007		TRBV5	TRBJ1-5	CASSQDLSYNNQAPLF	54588	0.880437		TRBV1	TRBJ1-5	CSADQEAPLF	90697	1.11999
TRBV1	TRBJ2-7	CSARLGWEQYF	24260	0.328827		TRBV26	TRBJ2-3	CASSLAHAETLYF	38249	0.500134		TRBV1	TRBJ2-5	CSATKDTQYF	69897	0.998173		TRBV1	TRBJ2-1	CSGVAEQF	39409	0.635619		TRBV1	TRBJ2-1	CSAGHNNYAEQF	88579	1.09383
TRBV13-1	TRBJ1-4	CASRDSSNERLF	24124	0.326984		TRBV1	TRBJ2-3	CSADPAETLYF	33478	0.437749		TRBV1	TRBJ1-1	CSPGQSNTEVF	69362	0.990533		TRBV1	TRBJ2-5	CSAVNQDTQYF	39173	0.631812		TRBV1	TRBJ2-5	CSASRDPGGDTQYF	87305	1.0781
TRBV1	TRBJ1-2	CSARTGHSDYTF	23588	0.319718		TRBV13-3	TRBJ2-7	CASSQTGGKVYEQYF	31338	0.409767		TRBV1	TRBJ1-6	CSADPTDNSPLYF	64234	0.917302		TRBV26	TRBJ1-1	CASSGTGYTEVF	38442	0.620022		TRBV13-3	TRBJ2-7	CASSDWDNSYEQYF	85949	1.06136
TRBV1	TRBJ1-5	CSAGPNNQAPLF	23498	0.318499		TRBV1	TRBJ2-4	CSKLGASQNTLYF	29331	0.383524		TRBV1	TRBJ2-7	CSARDWGDEQYF	53305	0.761229		TRBV29	TRBJ2-5	CASNRGDTQYF	37752	0.608893		TRBV13-3	TRBJ2-3	CASSDARGPSAETLYF	81504	1.00647
TRBV1	TRBJ2-7	CSGTGGSYEQYF	23297	0.315774		TRBV1	TRBJ1-1	CSAGQEVF	27923	0.365114		TRBV1	TRBJ2-5	CSAGNQDTQYF	45847	0.654724		TRBV12-1	TRBJ1-4	CASSAGTGYERLF	35368	0.570442		TRBV1	TRBJ1-3	CSINSGNTLYF	74477	0.919693
TRBV1	TRBJ1-2	CSGQGANSDYTF	23226	0.314812		TRBV5	TRBJ1-1	CASSQEGVGNTEVF	27005	0.35311		TRBV13-1	TRBJ1-1	CASSDAQKDTEVF	45280	0.646627		TRBV15	TRBJ2-1	CASRSTGGYNYAEQF	33149	0.534653		TRBV13-2	TRBJ2-1	CASGGGQGNYAEQF	71720	0.885647
TRBV1	TRBJ2-7	CSADQGMEQYF	22859	0.309837		TRBV12-1	TRBJ2-2	CASSLGQGDTGQLYF	26628	0.348181		TRBV1	TRBJ2-1	CSADGLGGYAEQF	44687	0.638159		TRBV15	TRBJ1-4	CASSLSHFSNERLF	32237	0.519943		TRBV1	TRBJ2-5	CSADQSGGGTQYF	66213	0.817643
TRBV1	TRBJ2-7	CSADDSSYEQYF	22304	0.302315		TRBV26	TRBJ2-7	CASSLDRSSYEQYF	23587	0.308417		TRBV1	TRBJ2-1	CSAGRAEQF	44153	0.630533		TRBV1	TRBJ1-4	CSAEPISNERLF	30338	0.489315		TRBV5	TRBJ2-1	CASSQGLGGRGAEQF	65579	0.809814
TRBV1	TRBJ2-3	CSADQGAGSAETLYF	21935	0.297313		TRBV12-1	TRBJ2-5	CASSPGTAPDTQYF	21929	0.286738		TRBV1	TRBJ2-3	CSADPETLYF	43598	0.622607		TRBV1	TRBJ2-4	CSADRLGVSQNTLYF	30009	0.484008		TRBV5	TRBJ2-7	CASSQGGREQYF	64189	0.792649
TRBV1	TRBJ1-1	CSAVEQNTEVF	21933	0.297286		TRBV1	TRBJ1-1	CSAGGNTEVF	20754	0.271374		TRBV1	TRBJ1-1	CSAAGGDTEVF	43032	0.614524		TRBV1	TRBJ1-4	CSADTQGFNERLF	28471	0.459202		TRBV13-3	TRBJ1-1	CASSGTSTEVF	63557	0.784845
TRBV1	TRBJ2-5	CSAAAGGFNQDTQYF	21925	0.297178		TRBV1	TRBJ2-1	CSAAGGYAEQF	19388	0.253512		TRBV13-2	TRBJ1-1	CASGQGRDTEVF	42769	0.610768		TRBV15	TRBJ2-1	CASSFRDWGYAEQF	28407	0.45817		TRBV1	TRBJ2-3	CSADGDRAPAETLYF	59575	0.735673
TRBV13-2	TRBJ2-7	CASGGTAYEQYF	21310	0.288842		TRBV12-1	TRBJ2-5	CASSLTGTQDTQYF	19186	0.250871		TRBV13-1	TRBJ2-7	CASSDVGYEQYF	42244	0.603271		TRBV12-1	TRBJ1-2	CASSLGTTNSDYTF	26939	0.434493		TRBV1	TRBJ2-4	CSAEGLGGSQNTLYF	59263	0.73182
TRBV1	TRBJ2-1	CSGTGNYAEQF	21181	0.287093		TRBV1	TRBJ2-1	CSKDAEQF	18778	0.245536		TRBV1	TRBJ2-5	CSAGASQDTQYF	41913	0.598544		TRBV1	TRBJ2-4	CAGHQNTLYF	25483	0.411009		TRBV1	TRBJ2-1	CSADEGNYAEQF	56291	0.69512
TRBV13-2	TRBJ2-5	CASGPTGGNQDTQYF	20375	0.276169		TRBV15	TRBJ1-4	CASSLGNERLF	18560	0.242686		TRBV1	TRBJ1-1	CSADINTEVF	41180	0.588076		TRBV12-1	TRBJ2-7	CASSRDKTYEQYF	25350	0.408864		TRBV1	TRBJ2-1	CSARDSNYAEQF	55640	0.687081
TRBV1	TRBJ1-6	CSADLRYNSPLYF	19957	0.270503		TRBV1	TRBJ2-5	CSAAWGQDTQYF	18456	0.241326		TRBV1	TRBJ2-7	CSANRADEQYF	39366	0.562171		TRBV13-2	TRBJ2-1	CASGTGAEQF	25073	0.404397		TRBV1	TRBJ2-7	CSAEGGGEQYF	55456	0.684808
TRBV1	TRBJ1-1	CSASGQENTEVF	19542	0.264878		TRBV3	TRBJ2-1	CASSFRQGYAEQF	17669	0.231035		TRBV1	TRBJ2-3	CSAEGGGPSAETLYF	38265	0.546448		TRBV1	TRBJ2-5	CSERDWGHQDTQYF	24453	0.394397		TRBV13-2	TRBJ2-5	CASGEGTGQDTQYF	54755	0.676152
TRBV12-1	TRBJ2-4	CASSLGQNTLYF	18871	0.255783		TRBV12-1	TRBJ1-2	CASSLEDRANSDYTF	17360	0.226995		TRBV1	TRBJ1-6	CSAGQYNSPLYF	37786	0.539608		TRBV12-1	TRBJ1-2	CASSPGGNSDYTF	22438	0.361897		TRBV1	TRBJ2-5	CSAEGQDTQYF	53252	0.657592
TRBV12-1	TRBJ2-2	CASSPDSGTGQLYF	18413	0.249575		TRBV5	TRBJ2-5	CASRKGDQDTQYF	17298	0.226184		TRBV1	TRBJ1-1	CSAGDTEVF	37760	0.539237		TRBV29	TRBJ2-1	CASSLGANYAEQF	22288	0.359478		TRBV1	TRBJ2-5	CSNPTGGPNQDTQYF	52847	0.652591
TRBV13-3	TRBJ2-1	CASSAQGADAEQF	18166	0.246227		TRBV5	TRBJ2-5	CASSQDWGDTQYF	17170	0.22451		TRBV13-3	TRBJ2-1	CASSDQSYAEQF	37041	0.528969		TRBV13-1	TRBJ2-7	CASSDEGDEQYF	22120	0.356768		TRBV16	TRBJ1-1	CASSLVGTDTEVF	52810	0.652134
TRBV1	TRBJ1-1	CSADANTEVF	17649	0.23922		TRBV1	TRBJ2-7	CSGRNYEQYF	17080	0.223334		TRBV1	TRBJ1-3	CSAGDRFYGNTLYF	36098	0.515502		TRBV13-2	TRBJ2-7	CASGDAGGVQYF	22054	0.355704		TRBV1	TRBJ2-7	CSADLGGNEQYF	52625	0.649849
TRBV1	TRBJ2-7	CSAVGTVEQYF	17045	0.231033		TRBV1	TRBJ2-7	CSAEDGSSYEQYF	16919	0.221228		TRBV1	TRBJ2-5	CSADLGDQDTQYF	34978	0.499508		TRBV1	TRBJ2-7	CSAGQTGGAYEQYF	21822	0.351962		TRBV12-1	TRBJ2-7	CASSLLGQGGEQYF	52385	0.646886
TRBV12-1	TRBJ2-5	CASSFNQDTQYF	16253	0.220298		TRBV26	TRBJ2-1	CASSPRDSYAEQF	16803	0.219712		TRBV1	TRBJ1-4	CSGDRISNERLF	34244	0.489026		TRBV1	TRBJ1-1	CSEQGRDTEVF	21636	0.348962		TRBV1	TRBJ2-7	CSAPGGYEQYF	52143	0.643897
TRBV12-1	TRBJ1-6	CARWDNSPLYF	15980	0.216597		TRBV13-2	TRBJ2-3	CASGDGGRRAETLYF	16676	0.218051		TRBV5	TRBJ2-3	CASSPGTSSAETLYF	33216	0.474345		TRBV1	TRBJ1-1	CSADHGGTEVF	21091	0.340172		TRBV1	TRBJ1-6	CSAGQYNSPLYF	52143	0.643897
TRBV5	TRBJ2-7	CASSQGQGAYEQYF	15974	0.216516		TRBV1	TRBJ1-2	CSAGANSDYTF	16354	0.213841		TRBV1	TRBJ1-1	CSAGREVF	33102	0.472717		TRBV1	TRBJ2-3	CSADRPSAETLYF	20572	0.331801		TRBV1	TRBJ1-5	CSADRGAAPLF	51988	0.641983
TRBV12-1	TRBJ2-1	CASSHRLGENYAEQF	15574	0.211094		TRBV1	TRBJ1-1	CSADDGQANTEVF	16189	0.211683		TRBV5	TRBJ1-1	CASSQDGGDTEVF	31188	0.445384		TRBV1	TRBJ2-7	CSAEGWGGYEQYF	20376	0.32864		TRBV1	TRBJ1-5	CSATGINQAPLF	51728	0.638773
TRBV1	TRBJ2-7	CSADPQGALEQYF	15568	0.211013		TRBV31	TRBJ1-1	CAWRLQNTEVF	16169	0.211422		TRBV1	TRBJ2-3	CSAGQTSAETLYF	28809	0.411411		TRBV1	TRBJ2-4	CSADQDWGGWQNTLYF	20174	0.325382		TRBV1	TRBJ2-7	CSADRFSYEQYF	50005	0.617496
TRBV1	TRBJ2-7	CSAANYEQYF	15184	0.205808		TRBV12-1	TRBJ1-3	CASSRDSSGNTLYF	16161	0.211317		TRBV5	TRBJ2-1	CASSPDWGNAEQF	28434	0.406055		TRBV31	TRBJ2-1	CAWTWGVNYAEQF	19996	0.322511		TRBV1	TRBJ1-3	CSATGVGGNTLYF	49696	0.61368
TRBV26	TRBJ1-4	CASSRQGADERLF	15050	0.203992		TRBV15	TRBJ2-1	CASSSSGVYAEQF	15899	0.207891		TRBV13-2	TRBJ2-5	CASGDGGGQDTQYF	27866	0.397944		TRBV1	TRBJ1-1	CSADRGGITEVF	19469	0.314011		TRBV1	TRBJ2-7	CSATGGAYEQYF	49506	0.611334
TRBV12-1	TRBJ2-7	CASSHWGREQYF	14730	0.199655		TRBV1	TRBJ2-3	CSAETETLYF	15814	0.20678		TRBV13-2	TRBJ2-7	CASGMEGGREQYF	27458	0.392118		TRBV13-3	TRBJ2-3	CASSATSAETLYF	19466	0.313963		TRBV1	TRBJ2-3	CSAPTGGGGAETLYF	48579	0.599887
TRBV1	TRBJ2-3	CSAETGGSAETLYF	14726	0.1996		TRBV26	TRBJ2-7	CASSPGLGYEQYF	14673	0.19186		TRBV5	TRBJ2-3	CASSQDWASAETLYF	26899	0.384135		TRBV1	TRBJ2-7	CSASGNEQYF	19386	0.312672		TRBV1	TRBJ1-1	CSARGTEVF	48380	0.597429
TRBV1	TRBJ2-4	CSAEGLGASQNTLYF	14660	0.198706		TRBV5	TRBJ2-3	CASSQDPGAETLYF	14281	0.186735		TRBV13-1	TRBJ2-2	CASRQANTGQLYF	26693	0.381193		TRBV1	TRBJ1-1	CSAEGGEVF	19288	0.311092		TRBV13-3	TRBJ2-5	CASSDRDQDTQYF	47804	0.590316
TRBV1	TRBJ2-1	CSAGGRAEQF	14570	0.197486		TRBV16	TRBJ2-3	CASSWGQGGSAETLYF	14252	0.186355		TRBV5	TRBJ2-7	CASSQDQRGEQYF	26315	0.375795		TRBV1	TRBJ1-1	CSVDIANTEVF	19238	0.310285		TRBV1	TRBJ2-5	CSLRGWDTQYF	46542	0.574732
TRBV1	TRBJ2-5	CSADWGLDTQYF	14533	0.196984		TRBV1	TRBJ2-7	CNPGQGWEQYF	14195	0.18561		TRBV1	TRBJ2-5	CSDPGGADQDTQYF	25626	0.365955		TRBV1	TRBJ2-7	CSGDRSYEQYF	18964	0.305866		TRBV1	TRBJ2-3	CSAARGGYF	46444	0.573522
TRBV1	TRBJ1-6	CSAGQLHNSPLYF	14397	0.195141		TRBV1	TRBJ2-5	CSADGTLNQDTQYF	14163	0.185192		TRBV1	TRBJ2-4	CSADPTKTSQNTLYF	25043	0.35763		TRBV1	TRBJ2-4	CSAEGWGYLYF	18947	0.305592		TRBV30	TRBJ1-4	CSSTAAFSNERLF	46193	0.570423
TRBV1	TRBJ2-5	CSADLGGRLDTQYF	14172	0.192091		TRBV1	TRBJ2-7	CSADYEQYF	14149	0.185009		TRBV5	TRBJ2-7	CASSQGLGVSYEQYF	24668	0.352275		TRBV1	TRBJ1-2	CRLRDRGDSDYTF	18124	0.292318		TRBV5	TRBJ2-5	CASSQDGGVQDTQYF	45959	0.567533
TRBV1	TRBJ2-5	CSAGGQDTQYF	14142	0.191685		TRBV1	TRBJ2-5	CSGQGNQDTQYF	14065	0.18391		TRBV1	TRBJ2-4	CSAEGEKSQNTLYF	24591	0.351175		TRBV1	TRBJ1-1	CSAPGTDGTEVF	18023	0.290689		TRBV1	TRBJ1-6	CSAGQRNSPLYF	45926	0.567126
TRBV1	TRBJ1-4	CSADSGTISNERLF	14137	0.191617		TRBV1	TRBJ1-5	CSAGGGDQAQHF	13963	0.182576		TRBV1	TRBJ2-7	CSADRGGGYEQYF	23871	0.340893		TRBV1	TRBJ1-1	CSGDKNTEVF	17964	0.289737		TRBV1	TRBJ2-5	CSAVDRGLDTQYF	45297	0.559358
TRBV12-1	TRBJ2-1	CASSLGLGSLYAEQF	14062	0.1906		TRBV1	TRBJ2-5	CSAVRVGDTQYF	13862	0.181256		TRBV1	TRBJ2-5	CSALGVDTQYF	23825	0.340236		TRBV1	TRBJ2-1	CSDWGYYAEQF	17785	0.28685		TRBV1	TRBJ2-7	CSAGGQGYEQYF	45266	0.558975
TRBV1	TRBJ2-4	CSEDGGGQNTLYF	13985	0.189557		TRBV1	TRBJ2-4	CSAETESQNTLYF	13809	0.180563		TRBV1	TRBJ2-7	CSAGGWQYF	23799	0.339865		TRBV1	TRBJ1-2	CSADGGAASDYTF	17650	0.284673		TRBV1	TRBJ1-1	CSADGANTEVF	45057	0.556395
TRBV1	TRBJ2-4	CSEDFSQNTLYF	13779	0.186764		TRBV12-1	TRBJ2-1	CASSLLQGYAEQF	13792	0.180341		TRBV1	TRBJ2-5	CSAGGLGQDTQYF	23676	0.338108		TRBV15	TRBJ2-1	CASSLQYAEQF	17619	0.284173		TRBV1	TRBJ2-1	CKPGLGDAEQF	44385	0.548096
TRBV1	TRBJ2-1	CSARDNYAEQF	13660	0.185152		TRBV13-2	TRBJ2-1	CASGDALGGHAEQF	13589	0.177686		TRBV13-1	TRBJ1-1	CASSEGQRNTEVF	23297	0.332696		TRBV1	TRBJ1-6	CSAQGGYNSPLYF	17287	0.278818		TRBV1	TRBJ2-7	CSADTYEQYF	43963	0.542885
TRBV1	TRBJ1-4	CSAGFSNERLF	13650	0.185016		TRBV1	TRBJ2-3	CSAAGGAKETLYF	13586	0.177647		TRBV1	TRBJ2-7	CSAGLGGREQYF	23270	0.33231		TRBV13-3	TRBJ2-5	CASSRTGVQDTQYF	17241	0.278076		TRBV1	TRBJ2-2	CSAVANTGQLYF	43942	0.542626
TRBV1	TRBJ2-7	CSADDWGGDEQYF	13589	0.184189		TRBV12-1	TRBJ2-1	CASSPGQGNYAEQF	13542	0.177072		TRBV1	TRBJ2-5	CSGTGGARDTQYF	23267	0.332267		TRBV12-1	TRBJ2-7	CASSPGGGSEQYF	16794	0.270867		TRBV26	TRBJ2-4	CASSPRGRQNTLYF	43817	0.541082
TRBV15	TRBJ2-2	CASTGQLNTGQLYF	13498	0.182956		TRBV15	TRBJ2-7	CASSFSGGAREQYF	13366	0.17477		TRBV5	TRBJ1-2	CASSQDGTANSDYTF	23241	0.331896		TRBV1	TRBJ1-1	CSADYTEVF	16715	0.269592		TRBV1	TRBJ2-7	CSASGGEQYF	43498	0.537143
TRBV1	TRBJ2-5	CSAGLGGRNQDTQYF	13479	0.182698		TRBV1	TRBJ2-5	CSGLEDTQYF	13308	0.174012		TRBV31	TRBJ2-2	CAWSLPRGSNTGQLYF	23010	0.328597		TRBV1	TRBJ2-7	CSAVGGKYEQYF	16582	0.267447		TRBV1	TRBJ1-4	CMALSNERLF	43223	0.533747
TRBV1	TRBJ2-3	CSAEEGSETLYF	13323	0.180584		TRBV1	TRBJ1-4	CSAEQFNERLF	13306	0.173986		TRBV1	TRBJ2-2	CSAGTGTGQLYF	22923	0.327355		TRBV13-2	TRBJ2-4	CASGERQFSQNTLYF	16390	0.264351		TRBV30	TRBJ2-5	CSSSRNNQDTQYF	42670	0.526918
TRBV1	TRBJ2-3	CSAAGTASAETLYF	13074	0.177209		TRBV1	TRBJ1-4	CSADRDKYNERLF	13069	0.170887		TRBV1	TRBJ2-2	CSADWGDTGQLYF	22765	0.325099		TRBV1	TRBJ1-3	CSAVGQGAGNTLYF	16379	0.264173		TRBV1	TRBJ2-4	CSADRGQNTLYF	42401	0.523596
TRBV12-1	TRBJ1-4	CASSLEGNERLF	13069	0.177141		TRBV1	TRBJ2-3	CSAGLGSSAETLYF	13023	0.170285		TRBV13-2	TRBJ1-1	CASGPGQGATEVF	22755	0.324956		TRBV5	TRBJ2-5	CASSQDWGPQDTQYF	16217	0.26156		TRBV26	TRBJ2-1	CASSRDYAEQF	42174	0.520793
TRBV1	TRBJ1-6	CSADRANSPLYF	12974	0.175853		TRBV5	TRBJ1-1	CASSQDPGAGTEVF	13018	0.17022		TRBV1	TRBJ1-6	CSAAGNSPLYF	22470	0.320886		TRBV1	TRBJ1-3	CSADEGQGAGNTLYF	15887	0.256238		TRBV1	TRBJ2-5	CSPGLGGQDTQYF	41801	0.516187
TRBV5	TRBJ1-5	CASSLGTGDDNQAPLF	12884	0.174633		TRBV1	TRBJ2-7	CSGSYEQYF	13014	0.170168		TRBV13-2	TRBJ2-3	CASGDQLGGSAETLYF	22415	0.3201		TRBV13-3	TRBJ2-5	CASSWTGGHQDTQYF	15818	0.255125		TRBV1	TRBJ1-1	CSADRNTEVF	40708	0.50269
TRBV1	TRBJ1-5	CSADRGANQAPLF	12816	0.173712		TRBV13-3	TRBJ2-2	CASSDVQGANTGQLYF	12974	0.169645		TRBV5	TRBJ1-1	CASSQGQGANTEVF	22344	0.319086		TRBV31	TRBJ2-3	CAWSLGQGAGAETLYF	15814	0.25506		TRBV15	TRBJ1-2	CASSFRTNSDYTF	40504	0.500171
TRBV1	TRBJ1-2	CSAGGNSDYTF	12793	0.1734		TRBV1	TRBJ2-4	CSAGQGRENTLYF	12926	0.169017		TRBV5	TRBJ1-2	CASSQGDSDYTF	22332	0.318915		TRBV1	TRBJ2-7	CSAEQEQYF	15610	0.25177		TRBV1	TRBJ2-7	CSFSGTGSYEQYF	40071	0.494824
TRBV1	TRBJ2-4	CSAENSQNTLYF	12769	0.173075		TRBV13-1	TRBJ2-5	CASSDRGPNQDTQYF	12826	0.167709		TRBV13-2	TRBJ2-1	CASGDGTGGAEQF	22267	0.317987		TRBV3	TRBJ2-7	CASSLDWAGSYEQYF	15392	0.248254		TRBV1	TRBJ2-2	CSVGQNTGQLYF	39862	0.492243
TRBV1	TRBJ2-4	CSADDINTLYF	12748	0.17279		TRBV1	TRBJ1-2	CSAVPLNSDYTF	12732	0.16648		TRBV1	TRBJ2-2	CSAQGSTGQLYF	22074	0.315231		TRBV1	TRBJ2-4	CSGSQNTLYF	15244	0.245867		TRBV1	TRBJ1-1	CRVSGGVTEVF	39602	0.489032
TRBV1	TRBJ2-4	CSADSGENTLYF	12736	0.172627		TRBV1	TRBJ2-4	CSADRASQNTLYF	12522	0.163734		TRBV1	TRBJ2-5	CSDWGGAQDTQYF	21947	0.313417		TRBV5	TRBJ1-3	CASSPRGISGNTLYF	14930	0.240803		TRBV1	TRBJ1-1	CSAEGATEVF	39337	0.48576
TRBV1	TRBJ2-1	CSGDWGEQYF	12723	0.172451		TRBV1	TRBJ2-7	CSAEDRGGEQYF	12508	0.163551		TRBV1	TRBJ1-1	CSAGGQANTEVF	21883	0.312503		TRBV29	TRBJ2-1	CASSCGRESNYAEQF	14819	0.239012		TRBV5	TRBJ1-1	CASSQGQGDTEVF	38981	0.481364
TRBV1	TRBJ1-1	CSAAVANTEVF	12708	0.172248		TRBV1	TRBJ1-5	CSETLF	12379	0.161864		TRBV1	TRBJ2-7	CSGGQGAYEQYF	21850	0.312032		TRBV13-3	TRBJ2-7	CASSDAQ_CVASFTLQSSYEQYF	14694	0.236996		TRBV26	TRBJ2-7	CASSPGTGGYEQYF	38253	0.472374
TRBV1	TRBJ2-3	CSERTGSAETLYF	12697	0.172099		TRBV13-3	TRBJ2-7	CASRGHSSYEQYF	12375	0.161812		TRBV1	TRBJ2-7	CSGGGAGEQYF	21812	0.311489		TRBV13-3	TRBJ1-1	CASSDAQNTEVF	14487	0.233657		TRBV26	TRBJ1-2	CASSQGQTNSDYTF	38230	0.47209
TRBV1	TRBJ2-3	CSAVDWGDPETLYF	12623	0.171096		TRBV13-3	TRBJ2-7	CASTAGGDEQYF	11980	0.156647		TRBV1	TRBJ2-7	CSADGTIEQYF	21520	0.307319		TRBV13-3	TRBJ1-1	CASSDYRTNTEVF	14409	0.232399		TRBV1	TRBJ2-5	CSAVGDQDTQYF	38118	0.470707
TRBV1	TRBJ2-4	CSADTQNTLYF	12419	0.168331		TRBV1	TRBJ2-3	CSVRSSAETLYF	11617	0.151901		TRBV1	TRBJ1-1	CSAGGGDTEVF	21503	0.307076		TRBV13-3	TRBJ1-4	CASSSSNERLF	14146	0.228158		TRBV1	TRBJ1-1	CSAAQNTEVF	37752	0.466187
TRBV1	TRBJ2-7	CSADVLGEYEQYF	12397	0.168032		TRBV12-1	TRBJ2-1	CASSSGTGYAEQF	11539	0.150881		TRBV5	TRBJ2-5	CASSQAVNQDTQYF	21430	0.306034		TRBV12-1	TRBJ2-2	CASSLLGYTGQLYF	14027	0.226238		TRBV1	TRBJ1-1	CQGTENTEVF	37602	0.464335
TRBV1	TRBJ2-5	CSAGLEDTQYF	12389	0.167924		TRBV15	TRBJ2-2	CASSLNWVNTGQLYF	11445	0.149652		TRBV1	TRBJ2-1	CSARDWGF	21165	0.30225		TRBV1	TRBJ1-6	CSAEDIYNSPLYF	13859	0.223529		TRBV1	TRBJ1-1	CSGQGARATEVF	37356	0.461297
TRBV1	TRBJ2-3	CSAETSSAETLYF	12358	0.167504		TRBV13-2	TRBJ2-4	CASGDQNTLYF	11372	0.148697		TRBV1	TRBJ2-7	CSGGLSYEQYF	21163	0.302221		TRBV12-1	TRBJ2-5	CASSPTNQDTQYF	13759	0.221916		TRBV1	TRBJ2-3	CSVGSSAETLYF	37127	0.458469
TRBV1	TRBJ1-6	CSANREAPLYF	12349	0.167382		TRBV26	TRBJ2-5	CASSLGGQDTQYF	11254	0.147154		TRBV1	TRBJ2-1	CSAEYAEQF	20982	0.299636		TRBV5	TRBJ1-4	CASSQKDSNERLF	13688	0.220771		TRBV1	TRBJ2-1	CSADTGAEQF	37125	0.458445
TRBV1	TRBJ1-4	CSAREANERLF	12338	0.167233		TRBV13-2	TRBJ2-4	CASGGLGSQNTLYF	11247	0.147063		TRBV1	TRBJ1-1	CSAGDNTEVF	20796	0.29698		TRBV30	TRBJ2-1	CSPHRGWAEQF	13512	0.217932		TRBV1	TRBJ2-2	CTSTLGGGTGQLYF	36540	0.451221
TRBV1	TRBJ2-4	CSAEQGRNTLYF	12316	0.166935		TRBV12-1	TRBJ2-3	CASSLEGWGSAETLYF	11239	0.146958		TRBV1	TRBJ2-5	CSAASLGGRDTQYF	20623	0.294509		TRBV12-1	TRBJ1-3	CASSLRGTGNTLYF	13315	0.214755		TRBV1	TRBJ1-2	CRGPDYTF	36292	0.448158
TRBV1	TRBJ2-7	CRDWGDEQYF	12315	0.166921		TRBV16	TRBJ1-4	CASSNRGRHERLF	11087	0.144971		TRBV1	TRBJ2-4	CSDWGGQNTLYF	20597	0.294138		TRBV12-1	TRBJ2-7	CASSLGSYEQYF	13293	0.2144		TRBV13-3	TRBJ2-7	CASSGQGHSYEQYF	35708	0.440947
TRBV1	TRBJ2-4	CSADMGGRGQNTLYF	12302	0.166745		TRBV13-3	TRBJ1-2	CASSDISNSDYTF	10951	0.143192		TRBV1	TRBJ2-7	CSAKGQGDEQYF	20511	0.29291		TRBV13-2	TRBJ2-7	CASGEGTGGYEQYF	13149	0.212077		TRBV26	TRBJ2-1	CASSLDRIYAEQF	35658	0.440329
TRBV13-3	TRBJ2-3	CASSDISAETLYF	12278	0.166419		TRBV12-1	TRBJ2-7	CASSLWGSSYEQYF	10947	0.14314		TRBV1	TRBJ2-7	CSADRGGYEQYF	20396	0.291268		TRBV1	TRBJ1-4	CSADANNKRLF	13080	0.210964		TRBV1	TRBJ2-4	CSAGDSQNTLYF	35186	0.434501
TRBV1	TRBJ2-1	CSADQGRGAEQF	12264	0.16623		TRBV1	TRBJ1-6	CSGTYNSPLYF	10899	0.142512		TRBV1	TRBJ2-1	CSRRGYAEQF	20360	0.290754		TRBV12-1	TRBJ2-3	CASSDGTTSAETLYF	13054	0.210545		TRBV26	TRBJ1-2	CASSLRANSDYTF	34619	0.427499
TRBV15	TRBJ2-5	CASSLGTGGTQYF	12208	0.165471		TRBV26	TRBJ1-1	CASGQGNTEVF	10865	0.142068		TRBV1	TRBJ2-4	CSARLGTSQNTLYF	20293	0.289797		TRBV13-3	TRBJ2-7	CASSRLGGEQYF	13036	0.210255		TRBV1	TRBJ2-1	CSASQSNYAEQF	34455	0.425474
TRBV13-3	TRBJ2-4	CASSPDGQNTLYF	12158	0.164793		TRBV12-1	TRBJ2-1	CASSLAQGWAEQF	10777	0.140917		TRBV1	TRBJ2-2	CSAGQYTGQLYF	20250	0.289183		TRBV13-2	TRBJ2-5	CASGASGTKDTQYF	12878	0.207706		TRBV13-3	TRBJ2-1	CASSGGGNYAEQF	34363	0.424338
TRBV15	TRBJ2-7	CASRGQGEQYF	12117	0.164237		TRBV13-2	TRBJ2-1	CASGDMTGGNYAEQF	10749	0.140551		TRBV1	TRBJ2-2	CSAGTSNTGQLYF	20117	0.287283		TRBV13-2	TRBJ2-7	CASGDEQYF	12868	0.207545		TRBV5	TRBJ1-6	CASSPGTNSYNSPLYF	34333	0.423967
TRBV1	TRBJ1-1	CSVGFANTEVF	12094	0.163925		TRBV1	TRBJ1-1	CSADIANTEVF	10748	0.140538		TRBV30	TRBJ2-5	CSSRRGLGEDTQYF	19914	0.284384		TRBV12-1	TRBJ2-5	CASSLGLGGYQDTQYF	12854	0.207319		TRBV1	TRBJ1-5	CSAVGDNQAPLF	34260	0.423066
TRBV1	TRBJ1-1	CSADGGQDTEVF	12052	0.163356		TRBV13-2	TRBJ2-1	CASGFRDWGGNYAEQF	10673	0.139557		TRBV13-1	TRBJ2-7	CASSDLGGEQYF	19784	0.282528		TRBV13-2	TRBJ1-2	CASGEDNANSDYTF	12760	0.205803		TRBV1	TRBJ2-7	CSADRTGGSEQYF	33530	0.414051
TRBV1	TRBJ2-3	CSARLGGFAETLYF	12008	0.16276		TRBV13-2	TRBJ2-5	CASGGQGKQDTQYF	10538	0.137792		TRBV1	TRBJ1-4	CSAGDERLF	19775	0.282399		TRBV13-3	TRBJ2-1	CASSAGNYAEQF	12735	0.2054		TRBV26	TRBJ2-5	CASSLNRDTQYF	33488	0.413533
TRBV1	TRBJ1-6	CSPGTAGYNSPLYF	11896	0.161242		TRBV29	TRBJ1-1	CASSLSGTNTEVF	10481	0.137047		TRBV1	TRBJ1-4	CSADRAGGDERLF	19711	0.281486		TRBV15	TRBJ2-1	CASSLDRAEQF	12671	0.204368		TRBV5	TRBJ2-7	CASSPGLFYEQYF	33231	0.410359
TRBV1	TRBJ2-7	CSAWGGGEQYF	11893	0.161201		TRBV1	TRBJ2-5	CSARTGGDTQYF	10479	0.137021		TRBV1	TRBJ2-7	CSADWGSYEQYF	19468	0.278015		TRBV15	TRBJ2-4	CASSAGTKNTLYF	12662	0.204222		TRBV1	TRBJ2-4	CSADNRGQNTLYF	32787	0.404876
TRBV1	TRBJ1-1	CSADGTGKVF	11879	0.161011		TRBV15	TRBJ2-1	CASSLAGDAEQF	10391	0.13587		TRBV5	TRBJ2-2	CASSQALTGQLYF	19437	0.277573		TRBV12-1	TRBJ1-1	CASSLGGMDTEVF	12251	0.197594		TRBV1	TRBJ1-3	CSADHWNSGNTLYF	32703	0.403839
TRBV1	TRBJ2-5	CSADNGGINQDTQYF	11859	0.16074		TRBV1	TRBJ1-1	CSADRANTEVF	10353	0.135373		TRBV1	TRBJ1-3	CSADVGGSGNTLYF	19437	0.277573		TRBV15	TRBJ1-1	CASSLRGDGNTEVF	12191	0.196626		TRBV5	TRBJ2-7	CASSPTGGSYEQYF	32097	0.396356
TRBV13-3	TRBJ2-1	CASSSGTNAEQF	11850	0.160618		TRBV30	TRBJ2-1	CSSLTGNYAEQF	10292	0.134575		TRBV1	TRBJ1-1	CSVGQGNTEVF	19339	0.276173		TRBV15	TRBJ2-4	CASSSSQNTLYF	12060	0.194513		TRBV5	TRBJ2-1	CASSQNRNYAEQF	31165	0.384847
TRBV1	TRBJ2-7	CSADRDWAYEQYF	11835	0.160415		TRBV13-2	TRBJ2-3	CASGVLGGGAETLYF	10242	0.133922		TRBV1	TRBJ2-2	CSPGGARTGQLYF	19001	0.271346		TRBV16	TRBJ2-4	CASSFGSGGQNTLYF	12029	0.194013		TRBV31	TRBJ1-5	CASRDTNNQAPLF	30652	0.378512
TRBV1	TRBJ2-7	CSADTGGAGEQYF	11823	0.160252		TRBV1	TRBJ2-7	CSAGGAGEQYF	10123	0.132366		TRBV1	TRBJ1-4	CSADRIGSNERLF	18980	0.271046		TRBV15	TRBJ1-1	CASSLSTANTEVF	11915	0.192174		TRBV1	TRBJ1-4	CSAGQLSNERLF	30527	0.376968
TRBV1	TRBJ2-5	CSGTGGAGQDTQYF	11823	0.160252		TRBV13-2	TRBJ1-1	CASGDAGAEVF	10087	0.131895		TRBV1	TRBJ2-3	CSGQDAETLYF	18953	0.270661		TRBV15	TRBJ1-2	CASSRQSNSDYTF	11602	0.187126		TRBV5	TRBJ1-1	CASSQDKTGVTEVF	30334	0.374585
TRBV1	TRBJ1-1	CSDREGTEVF	11817	0.160171		TRBV13-3	TRBJ1-1	CASSWDRNTEVF	10071	0.131686		TRBV1	TRBJ1-1	CSAEGRGTEVF	18853	0.269233		TRBV13-2	TRBJ2-2	CASGARENTGQLYF	11600	0.187094		TRBV13-2	TRBJ2-7	CASGGPGQYEQYF	29487	0.364126
TRBV26	TRBJ2-7	CASSLLGAREQYF	11746	0.159209		TRBV13-3	TRBJ2-7	CASSTGTSSYEQYF	10041	0.131293		TRBV1	TRBJ2-3	CSGRQAETLYF	18827	0.268861		TRBV13-2	TRBJ2-7	CASGGPGLSSYEQYF	11524	0.185868		TRBV13-2	TRBJ2-3	CASGDERVGAETLYF	28826	0.355963
TRBV15	TRBJ2-7	CASRTGTGGALEQYF	11714	0.158775		TRBV1	TRBJ2-1	CSADSAGGYAEQF	10038	0.131254		TRBV1	TRBJ1-1	CSAGGNTEVF	18613	0.265805		TRBV29	TRBJ2-1	CASSPQEQF	11333	0.182787		TRBV13-3	TRBJ1-5	CASSGPTNNNQAPLF	28135	0.34743
TRBV1	TRBJ2-1	CSAVGLGGPYNYAEQF	11707	0.15868		TRBV1	TRBJ1-1	CSVRDTEVF	9921	0.129724		TRBV1	TRBJ2-1	CSADGGRAEQF	18607	0.26572		TRBV15	TRBJ2-5	CASSAGPFNQDTQYF	11178	0.180287		TRBV13-3	TRBJ2-7	CASSPDWGGYEQYF	27825	0.343602
TRBV1	TRBJ2-1	CSAVTGNYAEQF	11691	0.158463		TRBV1	TRBJ2-1	CSAGDGYAEQF	9869	0.129044		TRBV30	TRBJ2-7	CSSRLGGREQYF	18600	0.26562		TRBV12-1	TRBJ2-3	CASSWTGASAETLYF	11127	0.179465		TRBV13-2	TRBJ1-6	CASGESYNSPLYF	27793	0.343207
TRBV13-3	TRBJ2-1	CASSDRRYAEQF	11686	0.158395		TRBV1	TRBJ2-5	CSAGWGREDTQYF	9861	0.12894		TRBV13-2	TRBJ2-5	CASGDGGVDTQYF	18569	0.265177		TRBV26	TRBJ1-1	CASRPGQNTEVF	11063	0.178433		TRBV13-2	TRBJ1-1	CASGVPGQGPNTEVF	27049	0.334019
TRBV1	TRBJ1-2	CSADPGQGNSDYTF	11683	0.158355		TRBV12-1	TRBJ2-1	CASSLDNYAEQF	9795	0.128077		TRBV1	TRBJ2-2	CSLGGSNTGQLYF	18488	0.26402		TRBV12-1	TRBJ2-5	CASSLWDIQDTQYF	10984	0.177158		TRBV1	TRBJ2-2	CSADQGGDTGQLYF	26410	0.326129
TRBV1	TRBJ1-4	CSAGGTEPNERLF	11676	0.15826		TRBV31	TRBJ2-5	CAWSKTGDDTQYF	9784	0.127933		TRBV1	TRBJ2-5	CSADWGIQDTQYF	18467	0.26372		TRBV13-2	TRBJ1-5	CASGEEGNNQAPLF	10904	0.175868		TRBV13-2	TRBJ2-3	CASGPGLGNAETLYF	26230	0.323906
TRBV1	TRBJ1-5	CSAGANQAPLF	11610	0.157365		TRBV1	TRBJ2-7	CSALGGRGEQYF	9756	0.127567		TRBV1	TRBJ1-1	CSASGTGGTEVF	18391	0.262635		TRBV12-1	TRBJ1-2	CASSLNANSDYTF	10787	0.173981		TRBV5	TRBJ2-3	CASSQDGGAVAETLYF	25908	0.31993
TRBV13-1	TRBJ1-2	CASRTTSNSDYTF	11515	0.156078		TRBV12-1	TRBJ2-3	CASSLDWGFAETLYF	9717	0.127057		TRBV1	TRBJ2-4	CSADLSQNTLYF	18357	0.26215		TRBV13-2	TRBJ2-5	CASGDDQDTQYF	10689	0.1724		TRBV14	TRBJ1-6	CASSFGTGGAGSPLYF	25390	0.313533
TRBV15	TRBJ2-7	CASSLAGDEQYF	11496	0.15582		TRBV5	TRBJ2-5	CASSQDQLDQDTQYF	9677	0.126534		TRBV1	TRBJ1-2	CSADRGTNSDYTF	18330	0.261764		TRBV15	TRBJ2-5	CASSPLGEDTQYF	10668	0.172062		TRBV5	TRBJ1-1	CASSQTGGDTEVF	24730	0.305383
TRBV1	TRBJ2-7	CSAEWGKYEQYF	11467	0.155427		TRBV12-1	TRBJ1-4	CASSLGNSNERLF	9652	0.126207		TRBV1	TRBJ2-1	CSARTGGVNYAEQF	18291	0.261207		TRBV1	TRBJ2-5	CSADREDTQYF	10513	0.169562		TRBV26	TRBJ1-2	CASSLGTANSDYTF	24545	0.303098
TRBV30	TRBJ2-1	CSSSRGRAEQF	11432	0.154953		TRBV12-1	TRBJ1-4	CASSPTNERLF	9627	0.12588		TRBV1	TRBJ2-7	CSADRGQYEQYF	18221	0.260207		TRBV13-3	TRBJ1-1	CASSGTGGAEVF	10452	0.168578		TRBV13-2	TRBJ2-1	CASGDEAGGYAEQF	23927	0.295467
TRBV1	TRBJ2-7	CSADAGGSEQYF	11419	0.154776		TRBV1	TRBJ2-3	CSADDWGASAETLYF	9614	0.12571		TRBV30	TRBJ2-7	CSSGDCEQYF	18174	0.259536		TRBV26	TRBJ1-1	CASSSGPNTEVF	10387	0.16753		TRBV26	TRBJ1-1	CASSPTGSNTEVF	23844	0.294442
TRBV1	TRBJ2-3	CSADSAETLYF	11393	0.154424		TRBV1	TRBJ2-1	CSGTDYAEQF	9561	0.125017		TRBV1	TRBJ2-7	CSAVSGGVYEQYF	17955	0.256409		TRBV17	TRBJ1-4	CASSREGNERLF	10365	0.167175		TRBV13-1	TRBJ1-2	CASSDAAENSDYTF	23836	0.294343
TRBV13-2	TRBJ2-1	CASGRLDNYAEQF	11340	0.153706		TRBV5	TRBJ2-2	CASSQDRLSTGQLYF	9545	0.124808		TRBV1	TRBJ2-5	CSAGGGQDTQYF	17841	0.254781		TRBV13-3	TRBJ2-3	CASSDRGTGSSAETLYF	10356	0.16703		TRBV13-1	TRBJ1-2	CASSDEGGANSDYTF	23684	0.292466
TRBV1	TRBJ2-5	CRSGRGDTQYF	11309	0.153285		TRBV1	TRBJ2-1	CSARQGGYAEQF	9479	0.123945		TRBV5	TRBJ1-1	CASSQSITTNTEVF	17790	0.254052		TRBV13-3	TRBJ1-1	CASSRDRNTEVF	10329	0.166594		TRBV13-1	TRBJ1-1	CASSDVGEVF	23337	0.288181
TRBV13-1	TRBJ2-4	CASSEPGLGENTLYF	11270	0.152757		TRBV1	TRBJ2-4	CSADGGQGGQNTLYF	9446	0.123513		TRBV1	TRBJ2-1	CSADLGRNYAEQF	17777	0.253867		TRBV26	TRBJ2-7	CASRDWGYEQYF	10268	0.16561		TRBV5	TRBJ1-1	CASSQGTTNTEVF	23233	0.286897
TRBV13-3	TRBJ2-7	CASSDLGAYEQYF	11241	0.152364		TRBV1	TRBJ2-4	CSAKLSQNTLYF	9380	0.12265		TRBV5	TRBJ2-7	CASSPRDNYEQYF	17733	0.253238		TRBV1	TRBJ1-3	CSAAGGSGNTLYF	10262	0.165513		TRBV13-1	TRBJ2-1	CASSDDRTGLSEQF	23162	0.28602
TRBV1	TRBJ2-7	CSATDSSYEQYF	11235	0.152282		TRBV1	TRBJ2-1	CSAPGQGNYAEQF	9377	0.122611		TRBV1	TRBJ2-3	CSAGTGETLYF	17730	0.253196		TRBV26	TRBJ1-2	CASSLLPGANSDYTF	10251	0.165336		TRBV1	TRBJ2-1	CSGTGGDNYAEQF	22914	0.282958
TRBV1	TRBJ2-7	CSAGGREQYF	11224	0.152133		TRBV1	TRBJ2-5	CSADDDTQYF	9365	0.122454		TRBV1	TRBJ2-4	CSADGDWGSQNTLYF	17709	0.252896		TRBV13-3	TRBJ2-7	CASSEAGGHEQYF	10135	0.163465		TRBV13-1	TRBJ2-7	CASSGLGEGEQYF	22869	0.282402
TRBV1	TRBJ1-1	CSAGTPEVF	11197	0.151767		TRBV12-1	TRBJ2-1	CASSPHRDWGNAEQF	9327	0.121957		TRBV30	TRBJ2-7	CSSRDRDSYEQYF	17616	0.251568		TRBV13-3	TRBJ1-2	CASSDWNSDYTF	10119	0.163207		TRBV16	TRBJ1-3	CASSPNPGNTLYF	22748	0.280908
TRBV1	TRBJ2-1	CSKGRYAEQF	11173	0.151442		TRBV1	TRBJ1-1	CSAETGANTEVF	9321	0.121879		TRBV1	TRBJ2-7	CSADMGGGSYEQYF	17557	0.250725		TRBV31	TRBJ2-5	CALPSGTGGDQDTQYF	9909	0.15982		TRBV5	TRBJ2-3	CASSQDRVAETLYF	22581	0.278846
TRBV1	TRBJ2-3	CSADSGASAETLYF	11162	0.151293		TRBV1	TRBJ2-4	CSAEDSSQNTLYF	9308	0.121709		TRBV1	TRBJ2-1	CSAGGGVAEQF	17502	0.24994		TRBV13-3	TRBJ1-2	CASSDTNSDYTF	9901	0.159691		TRBV13-3	TRBJ1-1	CASSVTGEEVF	22309	0.275487
TRBV1	TRBJ2-3	CSGEGPETLYF	11152	0.151157		TRBV1	TRBJ2-5	CSAEGSQDTQYF	9278	0.121317		TRBV1	TRBJ2-5	CSADNLGQDTQYF	17493	0.249811		TRBV31	TRBJ2-7	CAWRRTGPEQYF	9758	0.157385		TRBV13-1	TRBJ1-3	CASSAGQGAGNTLYF	21686	0.267793
TRBV1	TRBJ2-7	CSAGSSYEQYF	11132	0.150886		TRBV1	TRBJ2-5	CSAVGNQDTQYF	9277	0.121304		TRBV5	TRBJ2-1	CASSQGLGGDAEQF	17477	0.249583		TRBV31	TRBJ2-3	CAWKYGGAETLYF	9728	0.156901		TRBV15	TRBJ2-7	CASSSLGDYEQYF	21319	0.263262
TRBV1	TRBJ2-1	CSEYAEQF	11127	0.150819		TRBV13-2	TRBJ2-7	CASGDAGYEQYF	9266	0.12116		TRBV1	TRBJ1-2	CSADRNSDYTF	17444	0.249111		TRBV31	TRBJ2-5	CAWSGGDQDTQYF	9716	0.156707		TRBV5	TRBJ2-5	CASSQDNQDTQYF	20987	0.259162
TRBV13-1	TRBJ2-1	CASSDAAGAEQF	11072	0.150073		TRBV1	TRBJ2-7	CSATGGRGEQYF	9260	0.121081		TRBV1	TRBJ1-1	CSADGSANTEVF	17401	0.248497		TRBV31	TRBJ2-4	CAWSLVVGGGQNTLYF	9681	0.156143		TRBV29	TRBJ1-6	CASSRQDYNSPLYF	20977	0.259038
TRBV1	TRBJ2-2	CSADAAGRDTGQLYF	10964	0.148609		TRBV1	TRBJ1-6	CSADANNSPLYF	9250	0.120951		TRBV5	TRBJ1-1	CASSQGLNTEVF	17275	0.246698		TRBV29	TRBJ2-1	CASSSGGALAEQF	9679	0.15611		TRBV13-2	TRBJ2-7	CASGGQPYEQYF	20726	0.255939
TRBV1	TRBJ1-1	CSPRGRSTEVF	10914	0.147931		TRBV1	TRBJ2-2	CSANWGGTGQLYF	9228	0.120663		TRBV1	TRBJ2-2	CSAVQDSNTGQLYF	17051	0.243499		TRBV5	TRBJ2-5	CASSQDAGGDTQYF	9614	0.155062		TRBV5	TRBJ2-4	CASSPGQGARGQNTLYF	20706	0.255692
TRBV1	TRBJ1-1	CSADRGAVTEVF	10914	0.147931		TRBV1	TRBJ2-2	CSARANTGQLYF	9190	0.120166		TRBV1	TRBJ2-3	CSGGHTSAETLYF	17044	0.243399		TRBV13-3	TRBJ1-1	CASSPGTDANTEVF	9613	0.155046		TRBV5	TRBJ2-5	CASSQDLVNQDTQYF	20581	0.254148
TRBV1	TRBJ1-3	CSADSSGNTLYF	10909	0.147864		TRBV1	TRBJ2-4	CSAPDSQNTLYF	9177	0.119996		TRBV13-3	TRBJ1-2	CASRTANSDYTF	16938	0.241885		TRBV13-3	TRBJ2-5	CASSERTKDTQYF	9551	0.154046		TRBV14	TRBJ2-7	CASSRTGYEQYF	20494	0.253074
TRBV1	TRBJ2-7	CSADGVEQYF	10881	0.147484		TRBV1	TRBJ2-3	CSAELGPSAETLYF	9137	0.119473		TRBV1	TRBJ1-3	CSPTGDTLYF	16911	0.2415		TRBV13-3	TRBJ2-2	CASSDLDTGQLYF	9518	0.153514		TRBV13-1	TRBJ1-2	CASSDADRNSDYTF	20162	0.248974
TRBV13-2	TRBJ1-2	CASGDADANSDYTF	10872	0.147362		TRBV1	TRBJ1-1	CSAEGGANTEVF	9137	0.119473		TRBV13-2	TRBJ2-7	CASGDAQYEQYF	16869	0.2409		TRBV13-3	TRBJ2-4	CASSAWGSSQNTLYF	9496	0.153159		TRBV5	TRBJ2-1	CASSQARDRYAEQF	19798	0.244479
TRBV1	TRBJ1-1	CSADTGANTEVF	10867	0.147294		TRBV26	TRBJ2-5	CASSHPGQGQDTQYF	9126	0.119329		TRBV5	TRBJ2-3	CASSPSLGGRSAETLYF	16624	0.237401		TRBV13-2	TRBJ2-5	CASAPRDWGGGDTQYF	9488	0.15303		TRBV13-1	TRBJ1-1	CASRPGQTEVF	19719	0.243504
TRBV13-2	TRBJ2-7	CASGGLGGLEQYF	10726	0.145383		TRBV17	TRBJ1-4	CASSREGVERLF	9123	0.11929		TRBV1	TRBJ2-4	CSGQSQNTLYF	16519	0.235902		TRBV13-3	TRBJ2-1	CASSDPGQNYAEQF	9478	0.152868		TRBV13-1	TRBJ2-3	CASSGGTGASAETLYF	19609	0.242145
TRBV1	TRBJ2-7	CSARPSSYEQYF	10713	0.145207		TRBV1	TRBJ2-4	CSGDRGQNTLYF	9121	0.119264		TRBV1	TRBJ1-1	CSAGQSNTEVF	16488	0.235459		TRBV26	TRBJ2-3	CASSPLQGAETLYF	9397	0.151562		TRBV14	TRBJ2-7	CASSGTGYEQYF	19432	0.23996
TRBV1	TRBJ1-5	CSRDNNQAPLF	10687	0.144855		TRBV15	TRBJ2-1	CASRGGGNYAEQF	9121	0.119264		TRBV13-3	TRBJ1-1	CASSPDRANTEVF	16471	0.235216		TRBV13-2	TRBJ2-3	CASGGRDWAAETLYF	9337	0.150594		TRBV5	TRBJ1-6	CASSQDRDRGSPLYF	19266	0.23791
TRBV1	TRBJ1-3	CSATGVGNTLYF	10671	0.144638		TRBV1	TRBJ2-1	CSAEAGGEDYAEQF	9075	0.118662		TRBV1	TRBJ1-4	CSADQTISNERLF	16371	0.233788		TRBV12-1	TRBJ2-7	CASSHDWGGYEQYF	9309	0.150143		TRBV13-2	TRBJ1-4	CASGAPTGSNERLF	19051	0.235255
TRBV13-3	TRBJ1-2	CASSDARANSDYTF	10627	0.144041		TRBV31	TRBJ1-2	CAWRQGANSDYTF	9073	0.118636		TRBV1	TRBJ1-4	CSAGQDNERLF	16272	0.232374		TRBV31	TRBJ1-1	CAWSLGAANTEVF	9301	0.150014		TRBV13-1	TRBJ2-7	CASSTHERAYEQYF	18938	0.233859
TRBV1	TRBJ1-5	CSARTDNNQAPLF	10621	0.14396		TRBV1	TRBJ2-7	CSGTGVEQYF	9066	0.118545		TRBV5	TRBJ2-1	CASSLGLGGHAEQF	16256	0.232146		TRBV31	TRBJ2-4	CAWSLVGATQNTLYF	9245	0.14911		TRBV13-1	TRBJ1-2	CASSDAGGGSDYTF	18364	0.226771
TRBV1	TRBJ1-4	CSADRETTNERLF	10596	0.143621		TRBV1	TRBJ2-3	CRTLGSAETLYF	9065	0.118532		TRBV1	TRBJ2-7	CSADTSYEQYF	16253	0.232103		TRBV12-1	TRBJ1-4	CASSDINERLF	9239	0.149014		TRBV13-1	TRBJ2-7	CASSDRTGGVYEQYF	18269	0.225598
TRBV15	TRBJ2-7	CASSPTGDEQYF	10457	0.141737		TRBV29	TRBJ2-2	CASSSGGTNTGQLYF	9048	0.118309		TRBV5	TRBJ2-1	CASSQATNYAEQF	16223	0.231675		TRBV13-2	TRBJ1-4	CASAGTGNERLF	9200	0.148385		TRBV5	TRBJ2-4	CASSQDSTISQNTLYF	18250	0.225363
TRBV13-3	TRBJ1-4	CASNAVSNERLF	10441	0.14152		TRBV13-1	TRBJ2-1	CASSDNYAEQF	9038	0.118178		TRBV1	TRBJ1-1	CSAGQANTEVF	16162	0.230804		TRBV31	TRBJ2-3	CAWRNWDSAETLYF	9166	0.147836		TRBV5	TRBJ2-7	CASSQAVYEQYF	18205	0.224808
TRBV13-3	TRBJ1-2	CASSDASANSDYTF	10413	0.141141		TRBV1	TRBJ1-6	CSADPGAYNSPLYF	9035	0.118139		TRBV1	TRBJ2-5	CSAGGQDTQYF	16039	0.229047		TRBV26	TRBJ1-4	CASSRQGVSNERLF	9096	0.146707		TRBV5	TRBJ1-4	CASSPGQGANERLF	17971	0.221918
TRBV13-2	TRBJ2-4	CASGEQGENTLYF	10406	0.141046		TRBV26	TRBJ2-7	CASSRDRSYEQYF	9024	0.117995		TRBV13-2	TRBJ2-7	CASGGEYEQYF	15941	0.227648		TRBV13-1	TRBJ1-1	CASSVTGANTEVF	8950	0.144352		TRBV31	TRBJ2-1	CASTGGPYAEQF	17938	0.221511
TRBV15	TRBJ2-4	CASSFQGGENTLYF	10388	0.140802		TRBV1	TRBJ1-1	CSAQGSNTEVF	9020	0.117943		TRBV1	TRBJ1-4	CSAPGQPLSNERLF	15934	0.227548		TRBV13-2	TRBJ2-2	CASGDRQQQNTGQLYF	8871	0.143078		TRBV5	TRBJ2-2	CASSQDRVTGQLYF	17789	0.219671
TRBV1	TRBJ2-7	CSADGGAREQYF	10377	0.140653		TRBV1	TRBJ1-1	CSAAGGQGHTEVF	8987	0.117512		TRBV1	TRBJ1-4	CSADWGRDERLF	15860	0.226491		TRBV13-2	TRBJ2-3	CASDDSGAETLYF	8798	0.141901		TRBV13-2	TRBJ2-4	CASGAWVGRGDTLYF	17547	0.216682
TRBV31	TRBJ2-4	CAWRLGENTLYF	10298	0.139582		TRBV1	TRBJ2-4	CSAERGDTLYF	8974	0.117342		TRBV1	TRBJ2-4	CSGTGGVSQNTLYF	15852	0.226377		TRBV26	TRBJ1-2	CASSRDTSNSDYTF	8786	0.141707		TRBV5	TRBJ1-4	CASSPRQGISNERLF	17394	0.214793
TRBV1	TRBJ1-2	CSAGGSDYTF	10284	0.139392		TRBV1	TRBJ1-6	CSAGQDNSPLYF	8967	0.11725		TRBV1	TRBJ1-4	CSADQGGNERLF	15784	0.225405		TRBV13-3	TRBJ1-2	CASSDGWTGGNSDYTF	8626	0.139127		TRBV13-3	TRBJ1-4	CASSRDRSNERLF	17268	0.213237
TRBV1	TRBJ1-4	CSAGQLSNERLF	10222	0.138552		TRBV1	TRBJ1-4	CSAGTPNERLF	8912	0.116531		TRBV5	TRBJ2-1	CASSPRDNYAEQF	15716	0.224434		TRBV13-2	TRBJ2-7	CASGDYRASYEQYF	8573	0.138272		TRBV26	TRBJ2-1	CASSLTGAGAGQF	17195	0.212336
TRBV13-3	TRBJ1-2	CASSDGSDYTF	10169	0.137833		TRBV1	TRBJ2-4	CSAGQGQNTLYF	8861	0.115864		TRBV5	TRBJ2-3	CASSQGLGGSAETLYF	15697	0.224163		TRBV13-2	TRBJ2-4	CASGDTSQNTLYF	8529	0.137562		TRBV13-2	TRBJ2-1	CASGVGAGAEQF	17090	0.211039
TRBV15	TRBJ2-7	CASSPPGQGAYEQYF	10154	0.13763		TRBV1	TRBJ2-7	CSADISYEQYF	8844	0.115642		TRBV1	TRBJ2-4	CSAGGVSQNTLYF	15658	0.223606		TRBV29	TRBJ2-7	CASSLGQGLYEQYF	8468	0.136578		TRBV13-1	TRBJ2-3	CASSDAQVAETLYF	16818	0.20768
TRBV13-3	TRBJ1-2	CASSDTNSDYTF	10144	0.137495		TRBV1	TRBJ2-7	CSADRQYEQYF	8830	0.115459		TRBV1	TRBJ1-3	CSAERGGNTLYF	15594	0.222692		TRBV13-2	TRBJ2-5	CASGDAGFQDTQYF	8467	0.136562		TRBV13-2	TRBJ2-4	CASGLRGENTLYF	16687	0.206062
TRBV1	TRBJ1-5	CSAPPGHHNQAPLF	10142	0.137468		TRBV1	TRBJ1-5	CSADQGTPNQAQHF	8827	0.115419		TRBV1	TRBJ1-3	CSATNSGNTLYF	15515	0.221564		TRBV13-3	TRBJ2-5	CASSEGDQDTQYF	8436	0.136062		TRBV5	TRBJ1-4	CASSRQGPNERLF	16663	0.205766
TRBV1	TRBJ1-4	CSAAISNERLF	10133	0.137346		TRBV1	TRBJ2-7	CSAGDRGYEQYF	8816	0.115276		TRBV13-1	TRBJ2-7	CASSDNQGTYEQYF	15487	0.221164		TRBV26	TRBJ1-1	CASSLGDRNTEVF	8428	0.135933		TRBV5	TRBJ1-4	CASSRDRGERLF	16600	0.204988
TRBV1	TRBJ2-1	CSALGGLYNYAEQF	10109	0.13702		TRBV1	TRBJ2-1	CSADSYAEQF	8809	0.115184		TRBV1	TRBJ2-4	CSAGYQNTLYF	15444	0.22055		TRBV5	TRBJ2-1	CASSQNWGVYAEQF	8403	0.13553		TRBV5	TRBJ2-2	CASSQEDWGGPGQLYF	16547	0.204334
TRBV13-3	TRBJ2-3	CASSDVGGSAETLYF	10108	0.137007		TRBV1	TRBJ2-4	CSATGTDTLYF	8800	0.115066		TRBV1	TRBJ2-4	CKQTGDQNTLYF	15375	0.219565		TRBV1	TRBJ2-5	CSAVTGGKWDTQYF	8381	0.135175		TRBV5	TRBJ1-4	CASSQDGTIF	16390	0.202395
TRBV1	TRBJ1-3	CSARTAGNTLYF	10073	0.136532		TRBV13-2	TRBJ2-5	CASGNTGGNQDTQYF	8785	0.11487		TRBV1	TRBJ1-1	CSAGGLTEVF	15307	0.218594		TRBV26	TRBJ2-5	CASSLFGWQDTQYF	8308	0.133998		TRBV26	TRBJ1-2	CASSTTTNSDYTF	16205	0.20011
TRBV1	TRBJ1-1	CSAEEGVGTEVF	9855	0.133577		TRBV1	TRBJ2-7	CSARDRGRDEQYF	8780	0.114805		TRBV31	TRBJ1-6	CAWSRGVNSPLYF	15282	0.218237		TRBV31	TRBJ2-1	CAWSLSGANYAEQF	8302	0.133901		TRBV5	TRBJ1-1	CASSNSENTEVF	16011	0.197715
TRBV31	TRBJ1-6	CAWSQGDNSPLYF	9842	0.133401		TRBV1	TRBJ1-1	CSAGSNTEVF	8768	0.114648		TRBV31	TRBJ2-5	CAWSRDNQDTQYF	15279	0.218194		TRBV1	TRBJ1-1	CSAGGGNTEVF	8212	0.132449		TRBV26	TRBJ1-3	CASSLQGAGNTLYF	15841	0.195615
TRBV1	TRBJ1-1	CSAGGGEVF	9744	0.132073		TRBV12-1	TRBJ2-7	CASSPTGGDEQYF	8761	0.114556		TRBV1	TRBJ2-7	CSAHQLTYEQYF	15243	0.21768		TRBV13-2	TRBJ1-1	CASGDARGHGTEVF	8212	0.132449		TRBV29	TRBJ1-1	CASSSGTNTEVF	15667	0.193467
TRBV1	TRBJ2-1	CSDRGHNYAEQF	9672	0.131097		TRBV1	TRBJ1-6	CSARDRGYNSPLYF	8731	0.114164		TRBV1	TRBJ1-4	CSAVTVISNERLF	15144	0.216266		TRBV13-3	TRBJ2-7	CASSDVGESSYEQYF	8190	0.132095		TRBV5	TRBJ1-1	CASSQTGGEGTEVF	15638	0.193109
TRBV1	TRBJ1-4	CKDSSNERLF	9631	0.130541		TRBV5	TRBJ1-1	CASSPPRANTEVF	8724	0.114073		TRBV1	TRBJ2-7	CSADWDWGYEQYF	15034	0.214695		TRBV13-3	TRBJ1-4	CASRTASNERLF	8176	0.131869		TRBV1	TRBJ1-5	CGATGINQAPLF	15267	0.188527
TRBV31	TRBJ2-5	CAWSPSGGVQDTQYF	9582	0.129877		TRBV1	TRBJ2-7	CSAEFGGVREQYF	8724	0.114073		TRBV1	TRBJ1-2	CSAEPGGSDYTF	15032	0.214666		TRBV13-3	TRBJ1-4	CASSERTFSNERLF	8161	0.131627		TRBV5	TRBJ2-1	CASSQDEGRYAEQF	15164	0.187255
TRBV15	TRBJ2-1	CASSFRDSYAEQF	9406	0.127492		TRBV1	TRBJ2-4	CSARQGENTLYF	8700	0.113759		TRBV5	TRBJ2-4	CASSAGSQNTLYF	15016	0.214438		TRBV13-3	TRBJ2-3	CASSSGRSAETLYF	8142	0.13132		TRBV5	TRBJ1-5	CASSQNNQAPLF	14555	0.179735
TRBV13-3	TRBJ2-4	CASSDWDSQNTLYF	9373	0.127044		TRBV1	TRBJ2-1	CSARLGGRPEQF	8696	0.113707		TRBV31	TRBJ2-1	CAWSRRLGGYAEQF	14815	0.211568		TRBV5	TRBJ2-7	CASSPGTGVYEQYF	8133	0.131175		TRBV26	TRBJ2-1	CASSLTGAGAEQF	14529	0.179414
TRBV1	TRBJ1-5	CSAGTGDQAPLF	9334	0.126516		TRBV1	TRBJ1-2	CSAPNSDYTF	8677	0.113458		TRBV13-2	TRBJ2-2	CASGANTGQLYF	14804	0.21141		TRBV13-2	TRBJ2-2	CASGAWGANTGQLYF	8112	0.130837		TRBV1	TRBJ2-5	CTYSAVGDQDTQYF	14083	0.173906
TRBV13-3	TRBJ1-4	CASSGTISNERLF	9315	0.126258		TRBV1	TRBJ2-5	CSLTGGFNQDTQYF	8619	0.1127		TRBV5	TRBJ2-1	CASSQDPDRAEQYF	14771	0.210939		TRBV12-1	TRBJ2-3	CASSLETSAETLYF	8073	0.130208		TRBV13-2	TRBJ2-5	CASGDARGVNQDTQYF	13829	0.17077
TRBV26	TRBJ1-2	CASSLYRNSDYTF	9283	0.125824		TRBV1	TRBJ2-5	CSVGRGGDTQYF	8610	0.112582		TRBV13-2	TRBJ2-2	CASGETGANTGQLYF	14766	0.210868		TRBV13-2	TRBJ2-1	CASGGPGRGNAEQF	8066	0.130095		TRBV16	TRBJ1-1	CASSLQGSHPEVF	13621	0.168201
TRBV13-3	TRBJ1-6	CASSPYNSPLYF	9234	0.12516		TRBV1	TRBJ2-2	CSPTGTGQLYF	8587	0.112281		TRBV1	TRBJ2-4	CSGGGNQNTLYF	14762	0.210811		TRBV13-3	TRBJ2-7	CASSEGTVGEQYF	8042	0.129708		TRBV5	TRBJ1-4	CASSLRQGGGAERLF	13545	0.167263
TRBV1	TRBJ2-7	CSAEGGSSYEQYF	9221	0.124984		TRBV26	TRBJ2-4	CASSLSRGQNTLYF	8565	0.111994		TRBV1	TRBJ1-1	CSGGQRDTEVF	14636	0.209011		TRBV31	TRBJ1-5	CAWSPSNQAPLF	7992	0.128901		TRBV5	TRBJ2-7	CASSPQTGGVSYEQYF	13172	0.162657
TRBV1	TRBJ2-7	CSLGLSSYEQYF	9215	0.124903		TRBV1	TRBJ2-5	CSAPSNQDTQYF	8559	0.111915		TRBV1	TRBJ1-1	CSAGTGGAEVF	14599	0.208483		TRBV16	TRBJ2-5	CASSLGTGQDTQYF	7987	0.12882		TRBV16	TRBJ1-6	CASRQAYNSPLYF	13139	0.162249
TRBV1	TRBJ2-7	CSAEGQGRTYEQYF	9196	0.124645		TRBV1	TRBJ2-4	CSAGQGRDTLYF	8559	0.111915		TRBV1	TRBJ1-1	CSAGDRGMEVF	14591	0.208369		TRBV5	TRBJ2-5	CASSQEGGVNQDTQYF	7945	0.128143		TRBV1	TRBJ2-1	CSEGLGDNYAEQF	13066	0.161348
TRBV13-3	TRBJ2-4	CASSPGLGGRQNTLYF	9177	0.124388		TRBV1	TRBJ1-1	CSADPHTEVF	8558	0.111902		TRBV5	TRBJ2-3	CASSPRGTETLYF	14585	0.208283		TRBV31	TRBJ2-7	CAWSAGGAGEQYF	7925	0.12782		TRBV5	TRBJ1-4	CASSQTGFERLF	12405	0.153185
TRBV12-1	TRBJ1-2	CASSLGQGRSDYTF	9168	0.124266		TRBV1	TRBJ2-3	CSALGGRSAETLYF	8552	0.111824		TRBV29	TRBJ2-5	CASSLQYQDTQYF	14580	0.208212		TRBV1	TRBJ1-4	CSPGNLSNERLF	7921	0.127756		TRBV5	TRBJ2-4	CASSQGQSSQNTLYF	12209	0.150765
TRBV12-1	TRBJ2-1	CASSLGYAEQF	9140	0.123886		TRBV29	TRBJ2-3	CASSQGAETLYF	8547	0.111758		TRBV1	TRBJ2-7	CSAWGGSYEQYF	14580	0.208212		TRBV31	TRBJ2-7	CAWSSGGSEQYF	7908	0.127546		TRBV29	TRBJ2-7	CASSLGYEQYF	12155	0.150098
TRBV13-3	TRBJ2-7	CASSDLRTGAYEQYF	9130	0.123751		TRBV1	TRBJ2-1	CSAGDSYAEQF	8543	0.111706		TRBV13-2	TRBJ2-1	CASGDAEQF	14448	0.206327		TRBV13-3	TRBJ2-2	CASSAGTWNTGQLYF	7908	0.127546		TRBV16	TRBJ1-3	CASSFRGGNTLYF	12029	0.148542
TRBV13-2	TRBJ2-1	CASGGTGDYAEQF	9130	0.123751		TRBV12-1	TRBJ1-2	CASSLVGLNSDYTF	8530	0.111536		TRBV31	TRBJ2-5	CAWSLAGGLQDTQYF	14363	0.205113		TRBV1	TRBJ1-4	CSADANSERLF	7841	0.126466		TRBV5	TRBJ2-7	CASSHGLGSSYEQYF	11913	0.14711
TRBV13-3	TRBJ1-1	CASSDATEVF	9091	0.123222		TRBV15	TRBJ1-1	CASSLAGRNTEVF	8495	0.111078		TRBV5	TRBJ2-3	CASSQDRDRGAETLYF	14328	0.204613		TRBV13-3	TRBJ2-7	CASSDTGGVEQYF	7817	0.126079		TRBV16	TRBJ1-1	CASSSGTGKVF	11672	0.144134
TRBV15	TRBJ2-2	CASSLGGDTGQLYF	8927	0.120999		TRBV1	TRBJ2-2	CSATGSNTGQLYF	8490	0.111013		TRBV5	TRBJ2-7	CASSQEDWGNYEQYF	14277	0.203885		TRBV13-3	TRBJ1-1	CASTNGQGPFF	7792	0.125675		TRBV5	TRBJ1-1	CASSQGGGNTEVF	11622	0.143516
TRBV13-2	TRBJ1-4	CASGDEQISNERLF	8849	0.119942		TRBV12-1	TRBJ1-4	CASSLRDISNERLF	8476	0.11083		TRBV5	TRBJ2-5	CASSQEGDQDTQYF	14008	0.200043		TRBV13-1	TRBJ1-2	CASSAQGANSDYTF	7737	0.124788		TRBV16	TRBJ1-4	CASSLGQTSNERLF	11464	0.141565
TRBV13-3	TRBJ2-3	CASSAGTGGSAETLYF	8815	0.119481		TRBV1	TRBJ1-5	CSAFGTNNQAQHF	8461	0.110634		TRBV5	TRBJ2-5	CASSHTEQDTQYF	14001	0.199943		TRBV13-3	TRBJ1-2	CASSGTANSDYTF	7669	0.123692		TRBV5	TRBJ2-4	CASSPHWGSQNTLYF	10824	0.133662
TRBV1	TRBJ2-3	CSGTGSAETLYF	8800	0.119278		TRBV12-1	TRBJ2-7	CASSLGLEQYF	8426	0.110176		TRBV5	TRBJ2-5	CASSQDNGRDTQYF	13897	0.198458		TRBV31	TRBJ1-3	CAWSLLRNSGNTLYF	7576	0.122192		TRBV5	TRBJ1-6	CASSGRQYNSPLYF	10690	0.132007
TRBV1	TRBJ1-4	CSGDRGGERLF	8786	0.119088		TRBV1	TRBJ1-6	CSGRDKNSPLYF	8415	0.110032		TRBV5	TRBJ2-2	CASSQENWGETGQLYF	13854	0.197844		TRBV1	TRBJ1-4	CSAGANNERLF	7533	0.121498		TRBV5	TRBJ1-1	CASSPGGDDTEVF	10686	0.131958
TRBV1	TRBJ1-4	CSADRTSNERLF	8784	0.119061		TRBV13-2	TRBJ1-4	CASGVGVANERLF	8391	0.109718		TRBV1	TRBJ2-1	CSAGDWGDHAEQF	13780	0.196787		TRBV31	TRBJ2-4	CAWSHRGQNTLYF	7467	0.120434		TRBV5	TRBJ1-4	CASSQAGTGDGERLF	10635	0.131328
TRBV13-3	TRBJ1-5	CASSAGTGGGQAPLF	8775	0.118939		TRBV13-2	TRBJ2-7	CASGEGGYEQYF	8379	0.109562		TRBV31	TRBJ2-4	CAWSLVGGQNTLYF	13663	0.195116		TRBV13-2	TRBJ1-1	CASGDGANTEVF	7461	0.120337		TRBV16	TRBJ1-1	CASSLETGNTEVF	10627	0.131229
TRBV13-2	TRBJ2-1	CASGEDWGGPYAEQF	8745	0.118532		TRBV1	TRBJ2-7	CSATGTGDDEQYF	8329	0.108908		TRBV1	TRBJ1-5	CSGGTNNQAQHF	13643	0.194831		TRBV5	TRBJ1-4	CASSSGTGVNERLF	7344	0.11845		TRBV5	TRBJ1-5	CASSQDWGGNNQAPLF	10558	0.130377
TRBV29	TRBJ2-7	CASRLSSYEQYF	8709	0.118044		TRBV31	TRBJ1-1	CAWSSQGHTEVF	8324	0.108842		TRBV31	TRBJ2-7	CAWSRGLGGREQYF	13558	0.193617		TRBV13-2	TRBJ1-1	CASGEPTNTEVF	7288	0.117546		TRBV29	TRBJ2-1	CASSLGGVNAEQF	9587	0.118387
TRBV1	TRBJ1-1	CRSGTGNTEVF	8700	0.117922		TRBV1	TRBJ2-7	CSSRQGNYEQYF	8309	0.108646		TRBV5	TRBJ1-6	CASSPAGKGDNSPLYF	13554	0.19356		TRBV13-2	TRBJ2-7	CASGELGTGGYEQYF	7278	0.117385		TRBV5	TRBJ1-6	CASSPDRDNSPLYF	9297	0.114806
TRBV1	TRBJ2-5	CSARGDQDTQYF	8690	0.117787		TRBV1	TRBJ2-1	CRPGLGVNYAEQF	8304	0.108581		TRBV1	TRBJ1-3	CSGTGAGNTLYF	13500	0.192789		TRBV26	TRBJ1-6	CASSGSYNSPLYF	7221	0.116466		TRBV5	TRBJ1-1	CASSQTGAGTEVF	9266	0.114423
TRBV12-1	TRBJ2-1	CASSPGSGAEQF	8657	0.117339		TRBV1	TRBJ2-3	CSEEDWGGPETLYF	8296	0.108476		TRBV5	TRBJ2-1	CASSPNWGGGAEQF	13423	0.191689		TRBV31	TRBJ2-7	CAWKLGGGEQYF	7206	0.116224		TRBV16	TRBJ2-5	CASSLDEGADQDTQYF	9128	0.112719
TRBV12-1	TRBJ2-1	CASSRGDYAEQF	8649	0.117231		TRBV13-2	TRBJ1-4	CASGAGTGIGERLF	8284	0.108319		TRBV5	TRBJ2-3	CASSQDLGVGAETLYF	13360	0.190789		TRBV5	TRBJ1-4	CASSQDGRANERLF	7157	0.115434		TRBV14	TRBJ1-6	CASSLGDNNSPLYF	8392	0.10363
TRBV13-2	TRBJ2-5	CASGASTGGGDTQYF	8567	0.11612		TRBV1	TRBJ2-1	CSAADWGLNYAEQF	8282	0.108293		TRBV31	TRBJ1-2	CAWGRDRVNSDYTF	13239	0.189061		TRBV13-2	TRBJ2-5	CASGDWEGTQYF	7155	0.115401		TRBV14	TRBJ2-1	CASRDNYAEQF	7870	0.0971841
TRBV12-1	TRBJ2-3	CASSPGLGSSAETLYF	8556	0.11597		TRBV15	TRBJ2-5	CASSPGKDTQYF	8238	0.107718		TRBV5	TRBJ1-1	CASSPGTGANTEVF	13157	0.18789		TRBV26	TRBJ1-4	CASSLSEGQNNERLF	7060	0.113869		TRBV13-3	TRBJ1-6	CASSEKGWNSPLYF	7788	0.0961715
TRBV13-3	TRBJ2-1	CASSGGGWYAEQF	8550	0.115889		TRBV15	TRBJ2-1	CASSLDSGAEQF	8230	0.107613		TRBV1	TRBJ1-2	CSVQGSCSDYTF	13099	0.187062		TRBV1	TRBJ1-1	CSTPGQGAPEVF	7006	0.112998		TRBV26	TRBJ1-3	CSLEIQSSEAGDSALYLCASSLSLRGNSGNTLYF	7621	0.0941093
TRBV1	TRBJ2-1	CSAGTGGDAEQF	8510	0.115347		TRBV1	TRBJ2-7	CSTGLGGYEQYF	8203	0.10726		TRBV5	TRBJ1-4	CASSPPGHNERLF	13064	0.186562		TRBV5	TRBJ2-4	CASSQEGRGQNTLYF	7000	0.112901		TRBV3	TRBJ1-4	CASSFSTVNERLF	7552	0.0932572
TRBV1	TRBJ2-7	CSAPTGGSYEQYF	8479	0.114927		TRBV15	TRBJ2-1	CASSRDWGGADYAEQF	8198	0.107195		TRBV5	TRBJ2-1	CASSQETGGKAEQF	13005	0.18572		TRBV31	TRBJ1-2	CAWSLQGNSDYTF	6975	0.112498		TRBV1	TRBJ2-3	CSEGQGNSAETLYF	7367	0.0909727
TRBV13-3	TRBJ2-7	CASSDDWAYEQYF	8467	0.114764		TRBV1	TRBJ2-7	CSAEGDLYEQYF	8194	0.107143		TRBV31	TRBJ2-3	CAWSQLGGAETLYF	12923	0.184549		TRBV16	TRBJ2-3	CASSRLGSAETLYF	6962	0.112288		TRBV14	TRBJ2-7	CASSLWGSSYEQYF	7106	0.0877497
TRBV13-3	TRBJ2-7	CASSSRDWGFSYEQYF	8422	0.114154		TRBV1	TRBJ1-6	CSARTGGNSPLYF	8181	0.106973		TRBV1	TRBJ1-1	CSASGGDTEVF	12832	0.183249		TRBV13-2	TRBJ2-1	CASGVGTGDNYAEQF	6898	0.111256		TRBV20	TRBJ2-7	CGARRLGGSYEQYF	6888	0.0850577
TRBV13-3	TRBJ1-6	CASTVSYNSPLYF	8414	0.114046		TRBV1	TRBJ2-5	CSAAGTYQDTQYF	8160	0.106698		TRBV13-2	TRBJ1-2	CASGDAEGASDYTF	12796	0.182735		TRBV13-1	TRBJ1-2	CASSDALSGQGGSDYTF	6872	0.110837		TRBV14	TRBJ2-5	CASTDRAQDTQYF	6870	0.0848354
TRBV1	TRBJ1-4	CSADVSNERLF	8339	0.113029		TRBV12-1	TRBJ2-7	CASSTRPPREQYF	8156	0.106646		TRBV5	TRBJ2-2	CASSQDQQGTGQLYF	12712	0.181535		TRBV13-3	TRBJ1-1	CASSPLDRADTEVF	6812	0.109869		TRBV13-2	TRBJ2-5	CASGGRTGQDTQYF	6825	0.0842797
TRBV13-3	TRBJ1-2	CASRDRANSDYTF	8313	0.112677		TRBV1	TRBJ1-1	CSADGTANTEVF	8150	0.106567		TRBV5	TRBJ2-7	CASSQDPPGGREQYF	12670	0.180936		TRBV13-2	TRBJ1-2	CASGERDKNSDYTF	6785	0.109434		TRBV13-3	TRBJ2-7	CASSDRSSYEQYF	6792	0.0838722
TRBV12-1	TRBJ2-1	CASSPGTGYAEQF	8302	0.112528		TRBV26	TRBJ1-1	CASSLVGRSTEVF	8138	0.10641		TRBV5	TRBJ2-7	CASSQDFDSYEQYF	12628	0.180336		TRBV13-2	TRBJ2-5	CASGDAGGRGQDTQYF	6753	0.108918		TRBV5	TRBJ1-1	CASSQTGADTEVF	6398	0.0790069
TRBV1	TRBJ1-1	CSSRQNANTEVF	8258	0.111931		TRBV1	TRBJ2-3	CSAPGGGAETLYF	8133	0.106345		TRBV13-2	TRBJ1-2	CASGGTATNSDYTF	12595	0.179865		TRBV13-2	TRBJ1-1	CASGDARRRANTEVF	6750	0.108869		TRBV3	TRBJ2-3	CASSRGTNSAETLYF	6083	0.075117
TRBV13-3	TRBJ2-7	CASSEFYEQYF	8195	0.111077		TRBV1	TRBJ1-6	CSARDRGRYNSPLYF	8102	0.10594		TRBV1	TRBJ1-4	CSPQGISNERLF	12546	0.179165		TRBV16	TRBJ2-7	CASSLGQNEQYF	6723	0.108434		TRBV5	TRBJ2-2	CASSHWRAGQLYF	6050	0.0747095
TRBV15	TRBJ2-2	CASSPDWGRNTGQLYF	8164	0.110657		TRBV30	TRBJ1-2	CSSRETGGTSDYTF	8074	0.105573		TRBV13-2	TRBJ1-2	CASGATGGSDYTF	12511	0.178665		TRBV13-3	TRBJ2-5	CASSEQGYQDTQYF	6697	0.108014		TRBV14	TRBJ2-5	CASSTGGDTQYF	5332	0.0658432
TRBV15	TRBJ2-5	CASSPQDTQYF	8152	0.110495		TRBV1	TRBJ1-2	CSAAKNSDYTF	8056	0.105338		TRBV5	TRBJ2-2	CASSQDGTGQLYF	12448	0.177765		TRBV13-2	TRBJ2-3	CASGDASRSSAETLYF	6687	0.107853		TRBV3	TRBJ2-7	CASSLGLGGYEQYF	5184	0.0640156
TRBV12-1	TRBJ2-4	CASSPTVSQNTLYF	8094	0.109708		TRBV26	TRBJ2-5	CASRDQDTQYF	8040	0.105129		TRBV13-2	TRBJ2-3	CASGDAGGARSAETLYF	12445	0.177722		TRBV13-1	TRBJ1-1	CASSPPANTEVF	6653	0.107305		TRBV14	TRBJ1-2	CASSGRVNSDYTF	5093	0.0628918
TRBV13-1	TRBJ1-1	CASSDWQGRGTEVF	8043	0.109017		TRBV1	TRBJ2-7	CSADAPEQYF	8027	0.104959		TRBV31	TRBJ2-7	CAWDWGYEQYF	12400	0.17708		TRBV13-2	TRBJ2-5	CASGDAGQDTQYF	6625	0.106853		TRBV3	TRBJ2-5	CASSLDGGQDTQYF	5030	0.0621139
TRBV15	TRBJ2-5	CASSPEQNQDTQYF	7949	0.107743		TRBV1	TRBJ1-1	CSVGQNTEVF	8022	0.104894		TRBV5	TRBJ2-3	CASSHTGGGAETLYF	12399	0.177066		TRBV15	TRBJ2-7	CASSSHYEQYF	6594	0.106353		TRBV13-2	TRBJ1-2	CASSENSDYTF	5005	0.0618051
TRBV5	TRBJ1-6	CASSQDGNSPLYF	7898	0.107052		TRBV1	TRBJ1-1	CSADGGQSTEVF	7992	0.104501		TRBV13-2	TRBJ2-7	CASGDIWGSSYEQYF	12387	0.176894		TRBV13-2	TRBJ2-5	CASGDARDWGGDTQYF	6536	0.105418		TRBV3	TRBJ2-1	CASSLETFYAEQF	5003	0.0617805
TRBV1	TRBJ1-3	CSGPGQDSGNTLYF	7897	0.107038		TRBV1	TRBJ1-2	CSALPGPNSDYTF	7984	0.104397		TRBV1	TRBJ1-4	CSADQGADNERLF	12358	0.17648		TRBV13-2	TRBJ2-4	CASGDLDWGENTLYF	6507	0.10495		TRBV3	TRBJ2-1	CASSSGHNNYAEQF	4931	0.0608913
TRBV13-2	TRBJ2-4	CASGDAGTGGSQNTLYF	7876	0.106754		TRBV1	TRBJ2-1	CSAHNYAEQF	7962	0.104109		TRBV31	TRBJ2-7	CAWSLGLGGHLEQYF	12234	0.174709		TRBV5	TRBJ2-2	CASSQETGGTTGQLYF	6450	0.104031		TRBV14	TRBJ1-1	CASRRDRGGEVF	4878	0.0602369
TRBV13-2	TRBJ1-1	CASGDANTEVF	7852	0.106428		TRBV1	TRBJ1-1	CSAEAVANTEVF	7947	0.103913		TRBV13-2	TRBJ2-5	CASGEAGGADTQYF	12189	0.174067		TRBV13-2	TRBJ1-6	CASSDAGDSPLYF	6361	0.102595		TRBV13-2	TRBJ2-4	CASGGTLGGENTLYF	4868	0.0601134
TRBV15	TRBJ2-1	CASSPVRYAEQF	7769	0.105303		TRBV13-2	TRBJ1-1	CASGDAAGNTEVF	7939	0.103808		TRBV13-2	TRBJ2-2	CASGDRDWGATGQLYF	12136	0.17331		TRBV13-3	TRBJ1-6	CASSENSYNSPLYF	6332	0.102127		TRBV13-2	TRBJ1-6	CAADSYNSPLYF	4718	0.0582611
TRBV1	TRBJ1-1	CSGDREVF	7746	0.104991		TRBV1	TRBJ2-1	CSAEPGLYAEQF	7928	0.103664		TRBV1	TRBJ2-5	CSARGRDQDTQYF	12074	0.172424		TRBV5	TRBJ1-4	CASSPGTNERLF	6263	0.101014		TRBV3	TRBJ2-5	CASSLEGRGQDTQYF	4639	0.0572855
TRBV13-2	TRBJ2-3	CASVTGGSSAETLYF	7746	0.104991		TRBV12-1	TRBJ2-7	CASSLDWGYEQYF	7928	0.103664		TRBV1	TRBJ1-1	CREGAGTEVF	12035	0.171867		TRBV13-2	TRBJ2-7	CASGGYEQYF	6231	0.100498		TRBV14	TRBJ1-4	CASSFTGPNLSNERLF	4609	0.0569151
TRBV1	TRBJ2-5	CSAEAIQDTQYF	7726	0.10472		TRBV1	TRBJ2-7	CSPSGTGGYEQYF	7910	0.103429		TRBV5	TRBJ1-5	CASSQVSQNNQAPLF	12017	0.17161		TRBV13-2	TRBJ2-5	CASGDSGTLNQDTQYF	6152	0.0992242		TRBV3	TRBJ1-1	CASSPGQYTEVF	4395	0.0542725
TRBV1	TRBJ1-1	CSGTGGAGTEVF	7721	0.104653		TRBV13-2	TRBJ1-4	CASGETGTGEGDERLF	7897	0.103259		TRBV13-2	TRBJ1-1	CASGDGRSNTEVF	11837	0.16904		TRBV16	TRBJ2-7	CASSLGWGGSSYEQYF	6128	0.0988371		TRBV13-3	TRBJ1-5	CASSEPTNNNQAPLF	4354	0.0537662
TRBV31	TRBJ2-3	CAWSLRGGAETLYF	7690	0.104232		TRBV29	TRBJ2-7	CASSFTRDSYEQYF	7885	0.103102		TRBV1	TRBJ1-1	CSAGRGGTEVF	11799	0.168497		TRBV13-3	TRBJ2-1	CASSEGNNYAEQF	6090	0.0982242		TRBV14	TRBJ2-2	CASSPQGRDTGQLYF	4163	0.0514076
TRBV31	TRBJ1-1	CAWTTGVNTEVF	7666	0.103907		TRBV1	TRBJ1-4	CSADGGTNERLF	7869	0.102893		TRBV1	TRBJ2-1	CSAVGLGGGAEQF	11737	0.167612		TRBV5	TRBJ2-5	CASSQDGGGQDTQYF	6053	0.0976274		TRBV14	TRBJ1-4	CASSFTPRANERLF	4140	0.0511235
TRBV1	TRBJ1-1	CSAGTTNTEVF	7648	0.103663		TRBV12-1	TRBJ2-5	CASSLPGVNQDTQYF	7845	0.102579		TRBV5	TRBJ1-6	CASSQDRVYNSPLYF	11684	0.166855		TRBV29	TRBJ2-7	CASRGLGGEQYF	6006	0.0968694		TRBV5	TRBJ1-1	CASGLKTNSNTEVF	3920	0.0484068
TRBV13-2	TRBJ2-5	CASGDDRAQDTQYF	7638	0.103528		TRBV1	TRBJ1-5	CSADGNNNQAQHF	7827	0.102344		TRBV30	TRBJ2-1	CSSYRGGAEQF	11683	0.166841		TRBV13-2	TRBJ2-1	CASGDARGNYAEQF	6003	0.096821		TRBV13-3	TRBJ1-3	CASSWDGSGNTLYF	3524	0.0435168
TRBV5	TRBJ2-7	CASSPRQGYEQYF	7635	0.103487		TRBV13-2	TRBJ1-5	CASGDRERNQAPLF	7827	0.102344		TRBV31	TRBJ1-2	CAWSPQGANSDYTF	11657	0.166469		TRBV15	TRBJ1-1	CASRDSANTEVF	5947	0.0959178		TRBV17	TRBJ2-1	CASSRDLGNYAEQF	3401	0.0419979
TRBV1	TRBJ1-3	CSDRNSGNTLYF	7601	0.103026		TRBV12-1	TRBJ2-7	CASSLGLGAYEQYF	7822	0.102278		TRBV5	TRBJ2-7	CASSQDRDRDDEQYF	11627	0.166041		TRBV16	TRBJ1-6	CASSLAGYNSPLYF	5893	0.0950468		TRBV3	TRBJ2-1	CASSPGTGGRAEQF	3186	0.0393429
TRBV26	TRBJ2-1	CASSPRDRNYAEQF	7594	0.102931		TRBV1	TRBJ2-3	CSADLWGSNAETLYF	7801	0.102004		TRBV5	TRBJ2-7	CASSQVGDSYEQYF	11549	0.164927		TRBV29	TRBJ1-1	CASSLQGTEVF	5874	0.0947404		TRBV12-2	TRBJ1-2	CASSPDNANSDYTF	3013	0.0372066
TRBV12-1	TRBJ1-6	CASSSGVNSPLYF	7569	0.102592		TRBV1	TRBJ2-1	CSAPWGGYAEQF	7758	0.101442		TRBV13-2	TRBJ2-2	CASGDEGAPTGQLYF	11536	0.164741		TRBV13-2	TRBJ1-2	CASGEVGQGNSDYTF	5865	0.0945952		TRBV5	TRBJ1-1	CASSLRTNSNTEVF	2786	0.0344034
TRBV12-1	TRBJ2-2	CASSLGAANTGQLYF	7557	0.10243		TRBV1	TRBJ1-3	CSADRNSGNTLYF	7738	0.10118		TRBV5	TRBJ2-5	CASSRDWGNQDTQYF	11390	0.162656		TRBV13-3	TRBJ2-7	CASSSGFYEQYF	5840	0.094192		TRBV15	TRBJ1-1	CASSLDRASTEVF	2359	0.0291305
TRBV1	TRBJ1-3	CSADQSNSGNTLYF	7541	0.102213		TRBV12-1	TRBJ1-2	CASSNPGHPNSDYTF	7695	0.100618		TRBV1	TRBJ1-4	CSGGTISNERLF	11375	0.162442		TRBV13-2	TRBJ1-2	CASGDRENSDYTF	5830	0.0940307		TRBV13-1	TRBJ1-2	CASSDADRNF	2327	0.0287354
TRBV13-2	TRBJ1-4	CASGDLGDERLF	7521	0.101942		TRBV15	TRBJ2-4	CASSLGGSQNTLYF	7683	0.100461		TRBV5	TRBJ2-3	CASSPDRESAETLYF	11347	0.162042		TRBV13-2	TRBJ1-5	CASRDKNNQAPLF	5827	0.0939823		TRBV1	TRBJ2-7	CSADQTGGSEQYF	2243	0.0276981
TRBV12-1	TRBJ2-7	CASSPGLHYEQYF	7500	0.101657		TRBV1	TRBJ2-7	CSADNYEQYF	7655	0.100095		TRBV31	TRBJ1-3	CAWSLGVGNTLYF	11323	0.1617		TRBV13-2	TRBJ1-2	CASGDGTGENSDYTF	5806	0.0936436		TRBV1	TRBJ2-3	CSTGSSLYF	2177	0.0268831
TRBV15	TRBJ2-4	CASRQRDRGRGQNTLYF	7499	0.101644		TRBV1	TRBJ1-1	CSGTQNTEVF	7652	0.100056		TRBV1	TRBJ2-5	CSRVQDTQYF	11307	0.161471		TRBV29	TRBJ2-3	CASSSPGTGGDAETLYF	5789	0.0933694		TRBV13-1	TRBJ1-2	CASSDRDRNSDYTF	2067	0.0255247
TRBV12-1	TRBJ2-7	CASSLHTGGYEQYF	7498	0.10163		TRBV1	TRBJ2-4	CSADFWGDGQNTLYF	7641	0.0999117		TRBV13-2	TRBJ2-2	CASGAGTTNTGQLYF	11290	0.161228		TRBV31	TRBJ1-6	CAWSLGPGQNNSPLYF	5725	0.0923372		TRBV13-1	TRBJ1-2	CASSLRDRGSDYTF	2044	0.0252407
TRBV12-1	TRBJ2-1	CASSRGTGAYAEQF	7490	0.101522		TRBV16	TRBJ1-4	CASSSGQGGANERLF	7619	0.099624		TRBV31	TRBJ1-4	CAWSWGISNERLF	11193	0.159843		TRBV13-2	TRBJ2-4	CASGAGQGDTLYF	5675	0.0915308		TRBV5	TRBJ1-1	CASSLKANSNTEVF	2010	0.0248208
TRBV13-3	TRBJ1-4	CASSDRRGRPNERLF	7476	0.101332		TRBV1	TRBJ1-1	CSGQGVSNTEVF	7562	0.0988787		TRBV5	TRBJ2-7	CASSPDGTGAYEQYF	11154	0.159286		TRBV5	TRBJ2-5	CASSQEWGKDTQYF	5561	0.0896921		TRBV17	TRBJ2-4	CASSRDWGSQNTLYF	1997	0.0246603
TRBV5	TRBJ2-7	CASSQDMGGGEQYF	7473	0.101291		TRBV1	TRBJ1-1	CSAPTGASNTEVF	7558	0.0988264		TRBV13-2	TRBJ2-5	CASGGTGGKDTQYF	11135	0.159015		TRBV13-2	TRBJ2-5	CASGDAGGVNQDTQYF	5536	0.0892889		TRBV17	TRBJ1-3	CASSSYRGIGNTLYF	1960	0.0242034
TRBV30	TRBJ1-2	CSSRGGANSDYTF	7460	0.101115		TRBV1	TRBJ2-1	CSAEGGDNYAEQF	7554	0.0987741		TRBV15	TRBJ1-4	CASSSDNNERLF	11106	0.158601		TRBV13-2	TRBJ2-2	CASGEDTPNTGQLYF	5482	0.0884179		TRBV5	TRBJ1-1	CASSLKTNSNTEAF	1932	0.0238577
TRBV16	TRBJ2-3	CASSSQGASAETLYF	7418	0.100546		TRBV1	TRBJ2-7	CRAGTGGAGEQYF	7549	0.0987087		TRBV1	TRBJ1-4	CSADNGDSNERLF	11094	0.158429		TRBV13-2	TRBJ1-1	CASGGQGAEVF	5305	0.0855631		TRBV15	TRBJ1-1	CASSLDRANTEVLF	1912	0.0236107
TRBV12-1	TRBJ2-1	CASSLGLGVYAEQF	7409	0.100424		TRBV26	TRBJ1-2	CASSLSRGPNSDYTF	7541	0.0986041		TRBV1	TRBJ2-5	CSAENNQDTQYF	10992	0.156973		TRBV13-1	TRBJ2-3	CASSAQGSSAETLYF	5254	0.0847406		TRBV5	TRBJ1-1	CASSLKTNSSTEVF	1837	0.0226845
TRBV13-2	TRBJ2-7	CASGDSYEQYF	7405	0.100369		TRBV1	TRBJ2-2	CSARTGGLNTGQLYF	7540	0.098591		TRBV13-1	TRBJ2-3	CASSLQGAETLYF	10979	0.156787		TRBV5	TRBJ1-1	CASSQGGNTEVF	5201	0.0838857		TRBV5	TRBJ1-1	CASSLKTNSNTEVLF	1829	0.0225857
TRBV15	TRBJ2-7	CASSLGVEQYF	7403	0.100342		TRBV12-1	TRBJ1-1	CASSPDSANTEVF	7537	0.0985518		TRBV31	TRBJ1-5	CAWSPGGMNQAQHF	10960	0.156516		TRBV13-2	TRBJ1-2	CASGDLSTNSDYTF	5165	0.0833051		TRBV5	TRBJ1-1	CASSLVGTDTEVF	1737	0.0214497
TRBV12-2	TRBJ2-4	CASSPGPSQNTLYF	7387	0.100125		TRBV30	TRBJ2-7	CSSRAGPSYEQYF	7531	0.0984733		TRBV13-2	TRBJ2-4	CASGDESSQNTLYF	10906	0.155745		TRBV13-1	TRBJ2-7	CASSDGQQYF	5121	0.0825954		TRBV17	TRBJ2-2	CASRTGGTGQLYF	1718	0.021215
TRBV15	TRBJ2-7	CASRQGNEQYF	7361	0.0997731		TRBV1	TRBJ1-2	CSADKGANSDYTF	7522	0.0983557		TRBV13-2	TRBJ1-4	CASGDAFGGISNERLF	10886	0.155459		TRBV13-1	TRBJ2-4	CASSDAPGDQNTLYF	5121	0.0825954		TRBV5	TRBJ1-1	CAGSLKTNSNTEVF	1689	0.0208569
TRBV15	TRBJ2-7	CASSLSYEQYF	7357	0.0997189		TRBV1	TRBJ1-1	CSADARGANTEVF	7520	0.0983295		TRBV31	TRBJ1-1	CAWSRGGDTEVF	10788	0.154059		TRBV5	TRBJ2-7	CASSQEGQGNEQYF	5016	0.0809019		TRBV1	TRBJ2-3	CSAGQGNSAETLYF	1686	0.0208199
TRBV31	TRBJ2-7	CAWSLETGEQYF	7331	0.0993664		TRBV1	TRBJ1-1	CSADRGRTEVF	7518	0.0983034		TRBV5	TRBJ2-7	CASSQDYHWGYEQYF	10703	0.152846		TRBV29	TRBJ2-7	CASSSQGEQYF	4968	0.0801277		TRBV13-1	TRBJ2-7	CASSTHEGAYEQYF	1644	0.0203012
TRBV1	TRBJ1-4	CSARDRVSNERLF	7312	0.0991089		TRBV1	TRBJ1-1	CSADRVDTEVF	7497	0.0980288		TRBV13-2	TRBJ2-5	CASGDARGQDTQYF	10564	0.150861		TRBV29	TRBJ2-5	CASSYPGHQDTQYF	4967	0.0801116		TRBV5	TRBJ1-5	CASSRNNQAPLF	1554	0.0191898
TRBV26	TRBJ2-5	CASSWDSQDTQYF	7268	0.0985125		TRBV26	TRBJ1-1	CASRDTPNTEVF	7461	0.097558		TRBV5	TRBJ1-6	CASSQDESGNSYNSPLYF	10555	0.150732		TRBV13-2	TRBJ2-1	CASGDARDWGNYAEQF	4956	0.0799342		TRBV5	TRBJ1-1	CASSLKTNSNAEVF	1542	0.0190417
TRBV13-3	TRBJ1-2	CASSVDRGWRTNSDYTF	7267	0.098499		TRBV1	TRBJ2-3	CPGSAETLYF	7444	0.0973358		TRBV13-2	TRBJ1-4	CASGISNERLF	10529	0.150361		TRBV16	TRBJ1-4	CASSLEGTNERLF	4950	0.0798374		TRBV5	TRBJ1-1	CASSLDRANTEVF	1515	0.0187083
TRBV5	TRBJ2-4	CASSQDLRGSQNTLYF	7208	0.0976993		TRBV16	TRBJ1-1	CASSLGQTANTEVF	7418	0.0969958		TRBV13-2	TRBJ1-4	CASGDATGNERLF	10409	0.148647		TRBV15	TRBJ1-1	CASRSGTGTEVF	4934	0.0795793		TRBV15	TRBJ1-1	CASSLDRADTEVF	1431	0.017671
TRBV15	TRBJ2-7	CASSPGVEQYF	7160	0.0970487		TRBV1	TRBJ2-7	CRGGIEQYF	7413	0.0969304		TRBV13-2	TRBJ2-1	CASGGPRDKYAEQF	10310	0.147233		TRBV13-2	TRBJ1-1	CASGVRDTEVF	4874	0.0786116		TRBV13-2	TRBJ2-4	CASGDAYTSQNTLYF	1431	0.017671
TRBV1	TRBJ1-3	CSADEGALSGNTLYF	7142	0.0968047		TRBV1	TRBJ2-7	CSARSYEQYF	7409	0.0968781		TRBV5	TRBJ1-1	CASSQEVF	10296	0.147033		TRBV29	TRBJ2-4	CASRGQGQNTLYF	4869	0.078531		TRBV5	TRBJ1-1	CASSLKTSSNTEVF	1417	0.0174981
TRBV26	TRBJ1-2	CASSLRHANSDYTF	7109	0.0963574		TRBV12-1	TRBJ1-4	CASSLRGGDERLF	7406	0.0968389		TRBV31	TRBJ2-5	CAWSLDWGGIDTQYF	10256	0.146462		TRBV5	TRBJ2-1	CASSQRTDYAEQF	4824	0.0778052		TRBV5	TRBJ1-1	CASSLKTDSNTEVF	1400	0.0172882
TRBV26	TRBJ2-3	CASDRGESAETLYF	7106	0.0963167		TRBV1	TRBJ1-4	CSETVSNERLF	7398	0.0967343		TRBV31	TRBJ1-3	CAWSLRGASSGNTLYF	10116	0.144463		TRBV29	TRBJ2-5	CASSPPGQGDTQYF	4815	0.07766		TRBV15	TRBJ1-1	CASSLVGTDTEVF	1394	0.0172141
TRBV15	TRBJ1-1	CASSQDRANTEVF	7100	0.0962354		TRBV1	TRBJ1-1	CSAGDTEVF	7383	0.0965381		TRBV5	TRBJ2-2	CASSPRGGDGQLYF	10102	0.144263		TRBV13-1	TRBJ2-3	CASSDGDWAETLYF	4812	0.0776116		TRBV13-1	TRBJ1-2	CASGDRADYTF	1380	0.0170412
TRBV15	TRBJ1-1	CASSLRQGANTEVF	7094	0.0961541		TRBV1	TRBJ2-5	CSAEGFQDTQYF	7380	0.0964989		TRBV30	TRBJ2-7	CSSRDRDWGDEQYF	9958	0.142207		TRBV13-1	TRBJ2-7	CASSGTGGEQYF	4760	0.0767729		TRBV1	TRBJ2-1	CSAGHNNYAEQSF	1318	0.0162756
TRBV12-1	TRBJ2-1	CASWDRNYAEQF	7077	0.0959237		TRBV13-2	TRBJ2-4	CASGDGTTQNTLYF	7364	0.0962897		TRBV1	TRBJ2-2	CSATGDTGQLYF	9890	0.141235		TRBV29	TRBJ2-3	CASSWTASAETLYF	4748	0.0765794		TRBV5	TRBJ1-1	CASSPKTNSNTEVF	1274	0.0157322
TRBV26	TRBJ2-1	CASSPDRGRAEQF	6994	0.0947987		TRBV26	TRBJ1-2	CASSLSTRESNSDYTF	7343	0.0960151		TRBV13-1	TRBJ2-3	CASHRAETLYF	9888	0.141207		TRBV13-2	TRBJ2-1	CASGVSGTEQF	4747	0.0765633		TRBV1	TRBJ2-3	CSVGQGDSAETLYF	1199	0.0148061
TRBV12-1	TRBJ2-5	CASSGGGGDTQYF	6988	0.0947173		TRBV1	TRBJ1-2	CRQYSDYTF	7313	0.0956228		TRBV5	TRBJ2-7	CASSQDPGGTRSSYEQYF	9862	0.140836		TRBV29	TRBJ2-2	CASRPGQNTGQLYF	4721	0.0761439		TRBV16	TRBJ1-1	CASGLVGTDTEVF	1181	0.0145838
TRBV12-1	TRBJ2-3	CASSLLGPSAETLYF	6988	0.0947173		TRBV1	TRBJ1-3	CSEDSGNTLYF	7312	0.0956098		TRBV31	TRBJ1-1	CAWSLDREVF	9859	0.140793		TRBV29	TRBJ1-3	CASRGQGNSGNTLYF	4717	0.0760794		TRBV5	TRBJ1-1	CASSLKTNSNTEVSF	1168	0.0144233
TRBV1	TRBJ1-3	CSRDSNSGNTLYF	6972	0.0945005		TRBV12-1	TRBJ2-4	CASSLTGGSQNTLYF	7309	0.0955705		TRBV13-2	TRBJ2-7	CASGDAPYEQYF	9856	0.14075		TRBV13-1	TRBJ2-5	CASSDAKDNQDTQYF	4697	0.0757568		TRBV26	TRBJ2-1	CASRRDYAEQF	1162	0.0143492
TRBV1	TRBJ2-5	CSAINQDTQYF	6961	0.0943514		TRBV12-1	TRBJ2-2	CASSATSNTGQLYF	7304	0.0955052		TRBV13-1	TRBJ2-7	CASSDTGGEQYF	9518	0.135923		TRBV29	TRBJ2-3	CASSWGDAETLYF	4696	0.0757407		TRBV15	TRBJ1-1	CASSLDGANTEVF	1158	0.0142998
TRBV30	TRBJ2-7	CSVDNSYEQYF	6954	0.0942565		TRBV26	TRBJ1-1	CASNLVGGRTEVF	7303	0.0954921		TRBV13-1	TRBJ2-1	CASSDRTGGNYAEQF	9484	0.135437		TRBV13-1	TRBJ2-5	CASRTGGAQDTQYF	4684	0.0755472		TRBV26	TRBJ2-1	CASSLTGVGAEQF	1144	0.0141269
TRBV12-1	TRBJ2-7	CASSPDWGNYEQYF	6950	0.0942023		TRBV1	TRBJ2-1	CSAGGPYAEQF	7291	0.0953352		TRBV31	TRBJ1-2	CAWSPGTANSDYTF	9471	0.135252		TRBV29	TRBJ2-4	CARLGVQNTLYF	4665	0.0752407		TRBV1	TRBJ2-1	CSAGYNNYAEQF	1142	0.0141022
TRBV13-2	TRBJ1-1	CASGDPRANTEVF	6949	0.0941887		TRBV1	TRBJ1-1	CSRDGTEVF	7272	0.0950867		TRBV31	TRBJ1-3	CAWSPTGSGNTLYF	9405	0.134309		TRBV13-2	TRBJ2-5	CASGDALGLGDNQDTQYF	4604	0.0742569		TRBV5	TRBJ1-1	CASSLETNSNTEVF	1102	0.0136082
TRBV15	TRBJ1-3	CASTQGAGNTLYF	6907	0.0936194		TRBV1	TRBJ2-1	CSAEVAEQF	7266	0.0950083		TRBV13-2	TRBJ1-2	CASGDARGAENSDYTF	9363	0.13371		TRBV13-3	TRBJ1-2	CASSEQGANSDYTF	4585	0.0739504		TRBV17	TRBJ1-1	CASSRQGANTEVF	1097	0.0135465
TRBV12-1	TRBJ1-3	CASSSGQGNSGNTLYF	6884	0.0933077		TRBV1	TRBJ2-3	CSADIQGNAETLYF	7237	0.0946291		TRBV13-2	TRBJ1-1	CASGEAPRDKNTEVF	9299	0.132796		TRBV13-2	TRBJ2-3	CASGDAGGGSAETLYF	4554	0.0734504		TRBV13-2	TRBJ1-6	CASGGSYNSPLYF	1094	0.0135095
TRBV26	TRBJ2-4	CASSLSWTGGSQNTLYF	6878	0.0932264		TRBV15	TRBJ1-3	CASSPDRGPGNTLYF	7227	0.0944983		TRBV13-1	TRBJ2-5	CASSGLLQDTQYF	9054	0.129297		TRBV5	TRBJ1-1	CASSQDPSANTEVF	4542	0.0732569		TRBV15	TRBJ1-1	CASSLKTNSNTEVF	1026	0.0126697
TRBV15	TRBJ1-1	CASSPGQGNTEVF	6825	0.092508		TRBV1	TRBJ2-4	CSGSQNTLYF	7216	0.0943545		TRBV5	TRBJ1-1	CASSHHRGRDTEVF	9011	0.128683		TRBV29	TRBJ1-6	CASSLGTGNHSPLYF	4505	0.0726601		TRBV1	TRBJ2-3	CTRSVGQGNSAETLYF	1003	0.0123857
TRBV13-1	TRBJ1-1	CASRGDRTNTEVF	6819	0.0924267		TRBV13-3	TRBJ2-1	CASSARLGAEQF	7212	0.0943022		TRBV1	TRBJ1-6	CSATGTGYNSPLYF	8974	0.128154		TRBV13-1	TRBJ2-7	CASSDVGYEQYF	4491	0.0724343		TRBV13-1	TRBJ1-5	CASSAGTNNNQAPLF	999	0.0123363
TRBV12-1	TRBJ1-5	CASSLVQDRYNQAPLF	6811	0.0923182		TRBV1	TRBJ2-7	CSAAQSSYEQYF	7209	0.094263		TRBV13-1	TRBJ1-3	CASSEAGWNTLYF	8937	0.127626		TRBV13-1	TRBJ2-4	CASSKPTQNTLYF	4484	0.0723214		TRBV1	TRBJ2-4	CSGDNSQNTSYF	998	0.012324
TRBV13-3	TRBJ1-6	CASSDGTNNSPLYF	6802	0.0921962		TRBV13-1	TRBJ1-3	CASSVAGLGNTLYF	7209	0.094263		TRBV1	TRBJ1-6	CRRQGASYNSPLYF	8851	0.126398		TRBV13-1	TRBJ2-1	CASSDAWGGNYAEQF	4408	0.0710956		TRBV5	TRBJ1-1	CASSLKTNPNTEVF	994	0.0122746
TRBV5	TRBJ2-7	CASSQERGLGGYEQYF	6797	0.0921285		TRBV1	TRBJ1-3	CSADQGWGNTLYF	7207	0.0942368		TRBV13-1	TRBJ2-4	CASSDAQNQNTLYF	8798	0.125641		TRBV29	TRBJ2-5	CASSLSTLNQDTQYF	4395	0.0708859		TRBV5	TRBJ1-1	CASSLKTNSDTEVF	982	0.0121264
TRBV15	TRBJ2-7	CASSLLGGYEQYF	6752	0.0915185		TRBV1	TRBJ2-5	CSADPGGEGTQYF	7203	0.0941845		TRBV5	TRBJ2-7	CASSQDGGASYEQYF	8537	0.121914		TRBV16	TRBJ1-2	CASSLATNSDYTF	4369	0.0704666		TRBV5	TRBJ1-1	CVSSLKTNSNTEVF	970	0.0119782
TRBV13-2	TRBJ2-3	CASGDGTSAETLYF	6728	0.0911932		TRBV3	TRBJ2-7	CASSVRDWGSYEQYF	7190	0.0940145		TRBV13-2	TRBJ1-5	CASGDSGRNNQAPLF	8534	0.121871		TRBV31	TRBJ1-2	CAWSHRGNSDYTF	4356	0.0702569		TRBV1	TRBJ2-5	CIPGLGGQDTQYF	951	0.0117436
TRBV15	TRBJ1-2	CASSSTGGSDYTF	6713	0.0909899		TRBV1	TRBJ2-7	CSADKDYEQYF	7175	0.0938184		TRBV1	TRBJ1-4	CSGTISNERLF	8425	0.120314		TRBV29	TRBJ2-7	CASHRGRVYEQYF	4326	0.0697731		TRBV12-2	TRBJ2-5	CASSLDSTGGAGQDTQYF	944	0.0116572
TRBV15	TRBJ1-4	CASSYPPRAISNERLF	6684	0.0905968		TRBV1	TRBJ2-7	CSARGREQYF	7133	0.0932692		TRBV13-2	TRBJ2-3	CASGDAGRGSAETLYF	8411	0.120114		TRBV13-3	TRBJ2-5	CASSGLGVQDTQYF	4319	0.0696602		TRBV1	TRBJ2-3	CSVGRGNSAETLYF	928	0.0114596
TRBV12-1	TRBJ1-2	CASSLDRVNSDYTF	6668	0.09038		TRBV1	TRBJ1-2	CSAGEGSDYTF	7132	0.0932561		TRBV1	TRBJ2-3	CSEQGAETLYF	8403	0.12		TRBV29	TRBJ2-1	CASSPQGANYAEQF	4278	0.0689989		TRBV5	TRBJ1-1	CASSLKTNSNTGVF	920	0.0113608
TRBV5	TRBJ2-7	CASSQRGGAGEQYF	6645	0.0900682		TRBV13-3	TRBJ2-5	CASSDPDQDTQYF	7108	0.0929423		TRBV13-2	TRBJ2-7	CASGSTGYEQYF	8402	0.119986		TRBV13-1	TRBJ2-1	CASSADRANYAEQF	4278	0.0689989		TRBV15	TRBJ1-1	CASSLGRANTEVF	882	0.0108915
TRBV1	TRBJ1-1	CSGRGGTEVF	6634	0.0899191		TRBV13-2	TRBJ2-1	CASGDARGNYAEQF	7101	0.0928508		TRBV13-2	TRBJ2-4	CASGDADRNTLYF	8396	0.1199		TRBV16	TRBJ2-1	CASSLVGTGDAEQF	4268	0.0688376		TRBV13-2	TRBJ2-3	CASSDARGPSAETLYF	861	0.0106322
TRBV15	TRBJ2-7	CASSLESSYEQYF	6598	0.0894312		TRBV1	TRBJ2-1	CSATRWGVYAEQF	7086	0.0926546		TRBV5	TRBJ1-3	CASSLGTSSGNTLYF	8272	0.118129		TRBV13-2	TRBJ2-3	CASGDAGAETLYF	4242	0.0684182		TRBV1	TRBJ2-2	CTRSADQGGDTGQLYF	850	0.0104964
TRBV15	TRBJ2-3	CASSTTGGAETLYF	6547	0.0887399		TRBV26	TRBJ1-2	CASTGTANSDYTF	7079	0.0925631		TRBV31	TRBJ1-3	CAWSPGQGAGNTLYF	8182	0.116844		TRBV16	TRBJ2-5	CASSLDGGPDTQYF	4182	0.0674505		TRBV1	TRBJ2-4	CSGDNSRNTLYF	847	0.0104593
TRBV26	TRBJ1-1	CASSPGDTEVF	6520	0.0883739		TRBV26	TRBJ1-2	CASSLHSNSDYTF	7065	0.0923801		TRBV13-1	TRBJ2-3	CASSESGETLYF	8136	0.116187		TRBV13-2	TRBJ2-1	CASGDWGADYAEQF	4157	0.0670473		TRBV1	TRBJ2-3	CSVGQGNSAETPYF	842	0.0103976
TRBV15	TRBJ2-7	CASSFSQGGEQYF	6493	0.088008		TRBV1	TRBJ2-5	CSADFHKDTQYF	7039	0.0920401		TRBV13-1	TRBJ2-7	CASSDRDWGYEQYF	7967	0.113774		TRBV29	TRBJ1-4	CASSRQGSNERLF	4151	0.0669505		TRBV15	TRBJ1-1	CASSLDRANTEAF	840	0.0103729
TRBV12-1	TRBJ2-7	CASSHSGTGGHEQYF	6489	0.0879537		TRBV1	TRBJ1-3	CSADEDSGNTLYF	7037	0.0920139		TRBV13-1	TRBJ2-7	CASSDAGTGAYEQYF	7951	0.113545		TRBV29	TRBJ1-3	CASSLSGDGNTLYF	4149	0.0669183		TRBV1	TRBJ2-3	CSVGQGSSAETLYF	825	0.0101877
TRBV15	TRBJ2-7	CASSLGGQYEQYF	6471	0.0877098		TRBV1	TRBJ2-7	CSAVYEQYF	7000	0.0915301		TRBV5	TRBJ2-1	CASSQDWGYAEQF	7912	0.112988		TRBV15	TRBJ2-5	CASSLMDNQDTQYF	4107	0.0662409		TRBV1	TRBJ2-4	CSGDNSQSTLYF	799	0.0098666
TRBV1	TRBJ2-3	CSAETGTSAETLYF	6469	0.0876827		TRBV1	TRBJ1-6	CSGQGSYNSPLYF	6997	0.0914909		TRBV29	TRBJ2-4	CASSPTENTLYF	7864	0.112303		TRBV13-2	TRBJ1-5	CASGETGGGNQAPLF	4105	0.0662086		TRBV1	TRBJ1-1	CSAAQNTEAF	781	0.00964432
TRBV1	TRBJ1-1	CSADRQGAYTEVF	6425	0.0870863		TRBV1	TRBJ2-4	CTYSAGLGEQNTLYF	6995	0.0914648		TRBV13-1	TRBJ1-2	CASSDLTNSDYTF	7823	0.111717		TRBV29	TRBJ2-3	CASSPTSAETLYF	4087	0.0659183		TRBV13-1	TRBJ1-1	CASRPGQTEVSF	781	0.00964432
TRBV1	TRBJ2-2	CSGTANTGQLYF	6410	0.086883		TRBV13-3	TRBJ1-1	CASSGQGANTEVF	6990	0.0913994		TRBV13-1	TRBJ2-7	CASSDAPPGGDEQYF	7722	0.110275		TRBV29	TRBJ1-3	CASRLTGDGNTLYF	4071	0.0656602		TRBV1	TRBJ2-4	CTRSGDNSQNTLYF	776	0.00958258
TRBV13-2	TRBJ2-7	CASGDRQYEQYF	6397	0.0867067		TRBV13-3	TRBJ2-7	CASSELGGRGEQYF	6978	0.0912425		TRBV13-1	TRBJ2-4	CASSDAKGGSQNTLYF	7671	0.109547		TRBV29	TRBJ1-5	CASSLSGSQAPLF	4069	0.065628		TRBV31	TRBJ2-1	CASTGGPYAGQF	770	0.00950848
TRBV1	TRBJ2-2	CSADGTGKVF	6388	0.0865848		TRBV1	TRBJ1-3	CRGQGAGGNTLYF	6951	0.0908894		TRBV13-1	TRBJ2-7	CASRLTEGQYEQYF	7655	0.109318		TRBV29	TRBJ2-4	CASSRGVSQNTLYF	4062	0.0655151		TRBV15	TRBJ1-1	CAGSLDRANTEVF	767	0.00947144
TRBV12-1	TRBJ2-1	CASSLLDSYAEQF	6388	0.0865848		TRBV5	TRBJ2-5	CASSQGGGQDTQYF	6945	0.090811		TRBV31	TRBJ2-4	CAWSPQSQNTLYF	7650	0.109247		TRBV5	TRBJ2-7	CASSQGGREQYF	4057	0.0654344		TRBV1	TRBJ2-1	CSARDSNYAGQF	760	0.009385
TRBV15	TRBJ1-1	CASSSGTGGAEVF	6356	0.086151		TRBV1	TRBJ2-4	CSAGNQNTLYF	6944	0.0907979		TRBV13-1	TRBJ2-1	CASSEGNAEQF	7564	0.108019		TRBV29	TRBJ2-7	CASSSRDWGVYEQYF	4020	0.0648377		TRBV1	TRBJ2-4	CSGGNSQNTLYF	758	0.0093603
TRBV1	TRBJ2-3	CSGTGGSAETLYF	6353	0.0861104		TRBV29	TRBJ2-3	CASSSGRDAETLYF	6932	0.090641		TRBV13-1	TRBJ1-5	CASSDAGDNQAPLF	7513	0.10729		TRBV29	TRBJ2-7	CASSVTINYEQYF	3992	0.064386		TRBV13-2	TRBJ2-3	CASGGERVGAETLYF	753	0.00929856
TRBV26	TRBJ2-5	CASSDRGGQDTQYF	6350	0.0860697		TRBV26	TRBJ2-7	CASTPRDRVF	6925	0.0905494		TRBV31	TRBJ2-7	CAWSWTGGSYEQYF	7431	0.106119		TRBV13-1	TRBJ2-5	CASRRGDNQDTQYF	3985	0.0642731		TRBV5	TRBJ1-1	CASSGTSTEVF	751	0.00927386
TRBV15	TRBJ1-4	CASSLLGRGNERLF	6350	0.0860697		TRBV1	TRBJ2-7	CSADPDTSSYEQYF	6924	0.0905364		TRBV5	TRBJ2-3	CASSQARGGAETLYF	7426	0.106048		TRBV16	TRBJ2-4	CASSLAVSQNTLYF	3979	0.0641764		TRBV1	TRBJ2-4	CSGDNSQNALYF	731	0.00902689
TRBV13-2	TRBJ2-5	CASGDRERQDTQYF	6340	0.0859342		TRBV1	TRBJ2-5	CSEGTGVHQDTQYF	6923	0.0905233		TRBV13-1	TRBJ2-7	CASSDEGYEQYF	7370	0.105248		TRBV29	TRBJ1-5	CASSLDRAQAPLF	3936	0.0634828		TRBV13-2	TRBJ1-1	CASSGTSTEVF	720	0.00889105
TRBV12-1	TRBJ2-4	CASSTTGQNTLYF	6331	0.0858122		TRBV15	TRBJ1-4	CASRWTVSNERLF	6921	0.0904971		TRBV13-2	TRBJ2-7	CASGERLGREQYF	7311	0.104406		TRBV16	TRBJ2-7	CASSLETGGGEQYF	3908	0.0630312		TRBV1	TRBJ1-5	CSAGTGVSQAPLF	714	0.00881696
TRBV26	TRBJ1-3	CASSLAGGAGNTLYF	6312	0.0855546		TRBV29	TRBJ1-1	CASSPGTTNTEVF	6912	0.0903795		TRBV13-1	TRBJ1-2	CASSDMGQGNSDYTF	7242	0.10342		TRBV16	TRBJ1-1	CASSLGSGGGTEVF	3900	0.0629022		TRBV13-3	TRBJ1-1	CASRQINTEVF	693	0.00855764
TRBV13-3	TRBJ2-3	CASSDARGLGAETLYF	6267	0.0849447		TRBV13-3	TRBJ2-3	CASSDRRTGSAETLYF	6893	0.090131		TRBV13-2	TRBJ2-2	CASGDADRATGQLYF	7180	0.102535		TRBV13-2	TRBJ1-4	CASGDAGQISNERLF	3839	0.0619183		TRBV1	TRBJ2-4	CSGDDSQNTLYF	680	0.0083971
TRBV15	TRBJ1-1	CASSLGQGDTEVF	6241	0.0845923		TRBV1	TRBJ2-3	CSADQGGGAETLYF	6879	0.089948		TRBV13-1	TRBJ2-3	CASSDDWGGEAETLYF	7126	0.101764		TRBV13-1	TRBJ2-2	CASSDRWGANTGQLYF	3838	0.0619022		TRBV15	TRBJ1-1	CASSLDRANAEVF	679	0.00838475
TRBV13-2	TRBJ2-7	CASGVAGTGEYEQYF	6202	0.0840637		TRBV1	TRBJ1-1	CSADLTGKEVF	6866	0.089778		TRBV13-2	TRBJ1-5	CASGAGTNNNQAPLF	7058	0.100793		TRBV1	TRBJ1-4	CSADANNEGLF	3831	0.0617893		TRBV15	TRBJ1-1	CASSLDRANTEVSF	671	0.00828596
TRBV13-2	TRBJ1-1	CASGETNTEVF	6197	0.0839959		TRBV1	TRBJ2-7	CSADMTGDYEQYF	6863	0.0897388		TRBV31	TRBJ1-1	CAWGAGTTEVF	6943	0.0991504		TRBV5	TRBJ1-4	CASSQEGSRERLF	3830	0.0617732		TRBV5	TRBJ1-1	CASSVTGEEVF	662	0.00817483
TRBV15	TRBJ1-3	CASSPPGSGNTLYF	6194	0.0839552		TRBV5	TRBJ2-3	CASSQDRGQGETLYF	6859	0.0896865		TRBV13-1	TRBJ2-1	CASGGGYAEQF	6912	0.0987077		TRBV13-1	TRBJ2-7	CASSDAGGSEQYF	3823	0.0616603		TRBV13-3	TRBJ1-1	CASSLKTNSNTEVF	662	0.00817483
TRBV15	TRBJ1-1	CASSSGQTEVF	6186	0.0838468		TRBV1	TRBJ1-1	CSGGQANTEVF	6854	0.0896211		TRBV13-1	TRBJ2-7	CASSEILGGYEQYF	6903	0.0985792		TRBV5	TRBJ1-3	CASSSGGAGNTLYF	3818	0.0615796		TRBV1	TRBJ2-4	CSGDNSQNTLCF	650	0.00802664
TRBV15	TRBJ1-5	CASSPDKNNQAPLF	6163	0.083535		TRBV26	TRBJ2-7	CASSSGQGARDEQYF	6852	0.0895949		TRBV13-1	TRBJ2-5	CASSDQLGGEDTQYF	6896	0.0984792		TRBV16	TRBJ2-7	CASSKDSYEQYF	3818	0.0615796		TRBV5	TRBJ1-1	CTSSLKTNSNTEVF	647	0.0079896
TRBV26	TRBJ2-2	CASSLGRNTGQLYF	6134	0.083142		TRBV1	TRBJ2-3	CSAAESAETLYF	6844	0.0894903		TRBV29	TRBJ2-5	CASSQGSQDTQYF	6870	0.0981079		TRBV13-1	TRBJ1-1	CASSDAWRGVF	3809	0.0614345		TRBV1	TRBJ1-1	CQGTGNTEVF	643	0.0079402
TRBV26	TRBJ2-2	CASSLGQGAGQLYF	6090	0.0825456		TRBV1	TRBJ2-7	CSALGTFSYEQYF	6835	0.0893726		TRBV29	TRBJ2-3	CASSPSGTGVAETLYF	6864	0.0980222		TRBV16	TRBJ1-1	CASSLGSTEVF	3806	0.0613861		TRBV13-1	TRBJ1-3	CASSDNSSGNTLYF	629	0.00776732
TRBV15	TRBJ1-1	CASSTGDTEVF	6082	0.0824371		TRBV5	TRBJ1-6	CASSQGTGGSPLYF	6793	0.0888235		TRBV13-1	TRBJ2-4	CASSETGGDTLYF	6756	0.0964799		TRBV1	TRBJ1-4	CTRSADANNERLF	3801	0.0613055		TRBV13-1	TRBJ1-4	CASSDGDRNERLF	625	0.00771793
TRBV15	TRBJ1-3	CASSLGGNSGNTLYF	6043	0.0819085		TRBV26	TRBJ1-4	CASSPDRVNERLF	6790	0.0887842		TRBV31	TRBJ1-1	CAWGAGNTEVF	6699	0.0956659		TRBV5	TRBJ1-4	CASSQEGRGESNERLF	3770	0.0608055		TRBV15	TRBJ1-1	CASSLDRANTGVF	608	0.007508
TRBV13-3	TRBJ2-4	CASSPSSQNTLYF	6035	0.0818001		TRBV1	TRBJ2-7	CSAEEAGGEQYF	6789	0.0887711		TRBV13-1	TRBJ2-5	CASRDRGGQDTQYF	6652	0.0949948		TRBV13-1	TRBJ2-7	CASSDSTGGHSYEQYF	3755	0.0605635		TRBV13-2	TRBJ2-7	CASSDWDNSYEQYF	607	0.00749565
TRBV26	TRBJ2-1	CASSLRYNYAEQF	6033	0.081773		TRBV1	TRBJ2-5	CSRGLGGRWDTQYF	6779	0.0886404		TRBV29	TRBJ2-7	CASSLWTEQYF	6637	0.0947805		TRBV16	TRBJ2-3	CASSPTGGSAETLYF	3744	0.0603861		TRBV14	TRBJ1-6	CASSSGTGGAGSPLYF	606	0.0074833
TRBV26	TRBJ2-1	CASSRTNYAEQF	6017	0.0815561		TRBV1	TRBJ1-1	CSATGKATEVF	6778	0.0886273		TRBV13-1	TRBJ1-3	CASSDAATNSGNTLYF	6590	0.0941094		TRBV13-2	TRBJ2-1	CASEQGNYAEQF	3727	0.0601119		TRBV1	TRBJ2-4	CSGDSSQNTLYF	605	0.00747095
TRBV13-3	TRBJ1-2	CASSAGQANSDYTF	6004	0.0813799		TRBV26	TRBJ2-5	CASSLGTVNQDTQYF	6775	0.0885881		TRBV13-2	TRBJ2-3	CASLRDNAETLYF	6532	0.0932811		TRBV16	TRBJ2-7	CASSLDEGYEQYF	3684	0.0594184		TRBV12-1	TRBJ1-6	CASSLGRGNSPLYF	603	0.00744625
TRBV13-3	TRBJ2-4	CASRPGLGAQNTLYF	6000	0.0813257		TRBV13-2	TRBJ2-2	CASGDFWVHTGQLYF	6766	0.0884704		TRBV31	TRBJ1-6	CAWSLPRGNSPLYF	6456	0.0921957		TRBV16	TRBJ2-3	CASSFGGGAETLYF	3650	0.05887		TRBV1	TRBJ2-3	CGVGQGNSAETLYF	600	0.00740921
TRBV29	TRBJ2-3	CASSLSDRGAETLYF	5995	0.0812579		TRBV1	TRBJ1-4	CSARAVSNERLF	6765	0.0884573		TRBV13-2	TRBJ2-4	CASGGGQGAPENTLYF	6449	0.0920958		TRBV16	TRBJ1-4	CASSLVGTNERLF	3621	0.0584023		TRBV13-2	TRBJ1-2	CASSDRDRNSDYTF	582	0.00718693
TRBV13-2	TRBJ2-7	CAGGFSYEQYF	5984	0.0811088		TRBV13-2	TRBJ2-5	CASGGQGQDTQYF	6750	0.0882612		TRBV5	TRBJ1-1	CASSQDLRGNTEVF	6376	0.0910533		TRBV13-1	TRBJ2-7	CASSDAGSSYEQYF	3586	0.0578378		TRBV1	TRBJ1-1	CTRSARGTEVF	579	0.00714989
TRBV15	TRBJ1-1	CASSTGTGDTEVF	5980	0.0810546		TRBV1	TRBJ2-7	CSADQAGGDEQYF	6737	0.0880912		TRBV13-1	TRBJ2-7	CASSDARTEYEQYF	6368	0.0909391		TRBV29	TRBJ1-4	CASSRDSSNERLF	3529	0.0569184		TRBV13-2	TRBJ2-7	CASGGQLYEQYF	579	0.00714989
TRBV13-3	TRBJ1-2	CASSDAINSDYTF	5971	0.0809326		TRBV1	TRBJ2-1	CSAPGQYAEQF	6737	0.0880912		TRBV1	TRBJ1-5	CSAPGTDNNQAQHF	6335	0.0904678		TRBV12-1	TRBJ2-3	CASSSGQGRAETLYF	3465	0.0558862		TRBV13-2	TRBJ2-3	CASSGGTGASAETLYF	577	0.00712519
TRBV13-3	TRBJ1-2	CASSGQGSNSDYTF	5945	0.0805802		TRBV29	TRBJ1-5	CASSGQNNQAQHF	6716	0.0878166		TRBV31	TRBJ1-3	CAWSPRQTNSGNTLYF	6334	0.0904535		TRBV16	TRBJ2-7	CASSLELGGREQYF	3450	0.0556443		TRBV5	TRBJ2-3	CASSDARGPSAETLYF	572	0.00706345
TRBV16	TRBJ2-5	CASSILGNQDTQYF	5944	0.0805667		TRBV1	TRBJ1-3	CSAGTGPGNTLYF	6712	0.0877643		TRBV5	TRBJ2-1	CASSPRDRGAEQF	6285	0.0897538		TRBV16	TRBJ2-7	CASSLEAIPSYEQYF	3439	0.0554668		TRBV5	TRBJ2-7	CASSDWDNSYEQYF	567	0.0070017
TRBV26	TRBJ2-7	CASSLSGSSYEQYF	5940	0.0805124		TRBV29	TRBJ1-1	CASSPDRANTEVF	6700	0.0876074		TRBV29	TRBJ2-3	CASSLQGSSAETLYF	6266	0.0894824		TRBV16	TRBJ2-1	CASSLDGFNYAEQF	3373	0.0544023		TRBV1	TRBJ2-3	CSVGQGNSAEALYF	559	0.00690291
TRBV26	TRBJ1-1	CASSPRANTEVF	5935	0.0804447		TRBV13-3	TRBJ2-7	CASSDDEQYF	6693	0.0875159		TRBV13-2	TRBJ2-1	CASSRDWGETYAEQF	6141	0.0876974		TRBV1	TRBJ1-4	CSADADNERLF	3344	0.0539346		TRBV13-1	TRBJ2-3	CASSDARGPSAETLYF	555	0.00685352
TRBV12-1	TRBJ2-7	CASSLDLGGSEQYF	5928	0.0803498		TRBV15	TRBJ1-4	CASRDSNERLF	6689	0.0874636		TRBV13-1	TRBJ2-1	CASSLGQNNYAEQF	6113	0.0872975		TRBV13-1	TRBJ1-6	CASSGAGDSPLYF	3331	0.0537249		TRBV5	TRBJ1-1	CANSLKTNSNTEVF	554	0.00684117
TRBV13-2	TRBJ1-4	CASGDEGGPNERLF	5917	0.0802007		TRBV1	TRBJ1-1	CSADGSNTEVF	6665	0.0871498		TRBV5	TRBJ2-5	CASSQVLGDQDTQYF	6109	0.0872404		TRBV16	TRBJ2-1	CASSLEGTAYAEQF	3316	0.053483		TRBV13-2	TRBJ1-2	CASSLRDRGSDYTF	553	0.00682882
TRBV15	TRBJ2-5	CASRPTGEGDTQYF	5916	0.0801871		TRBV1	TRBJ2-3	CSGGHSAETLYF	6663	0.0871236		TRBV5	TRBJ1-4	CASSQDRGPNERLF	6102	0.0871404		TRBV13-1	TRBJ1-4	CARRGLSNERLF	3311	0.0534024		TRBV13-2	TRBJ2-5	CASSDRDQDTQYF	549	0.00677943
TRBV13-2	TRBJ2-1	CASGDARTGVAEQF	5901	0.0799838		TRBV15	TRBJ2-7	CASSPQLGGEQYF	6663	0.0871236		TRBV13-1	TRBJ1-1	CASSGGAHVF	6085	0.0868976		TRBV16	TRBJ2-2	CASSPGGANTGQLYF	3295	0.0531443		TRBV12-1	TRBJ1-2	CASSPDNANSDYTF	546	0.00674238
TRBV15	TRBJ2-7	CASSLVETYEQYF	5881	0.0797127		TRBV29	TRBJ1-1	CASSLEGRGNTEVF	6660	0.0870844		TRBV31	TRBJ1-1	CAWSLWGVF	5991	0.0855553		TRBV13-1	TRBJ1-3	CASSDRGRAGNTLYF	3286	0.0529991		TRBV13-2	TRBJ2-1	CASSDDRTGLSEQF	543	0.00670533
TRBV12-1	TRBJ2-3	CASSPSGQTSAETLYF	5881	0.0797127		TRBV1	TRBJ1-1	CSVGQGNTEVF	6641	0.0868359		TRBV13-2	TRBJ1-1	CASGERDREVF	5914	0.0844556		TRBV13-1	TRBJ1-1	CASKTGEGTEVF	3263	0.0526282		TRBV13-3	TRBJ2-7	CASSDWDNSYERYF	539	0.00665594
TRBV1	TRBJ2-7	CSAEQYEQYF	5880	0.0796992		TRBV1	TRBJ1-5	CSAETGDNNQAQHF	6614	0.0864829		TRBV5	TRBJ1-6	CASSLTGNSPLYF	5746	0.0820565		TRBV13-1	TRBJ2-4	CASSDWDRGMQNTLYF	3243	0.0523056		TRBV5	TRBJ1-1	CASSSGTGKVF	534	0.0065942
TRBV13-3	TRBJ2-4	CASSVGSQNTLYF	5869	0.0795501		TRBV1	TRBJ1-1	CSADRGRANTEVF	6608	0.0864044		TRBV5	TRBJ1-4	CASSQGRGPNERLF	5608	0.0800858		TRBV13-2	TRBJ2-7	CASGDALGTYEQYF	3237	0.0522088		TRBV1	TRBJ2-3	CSVGQGNSAGTLYF	533	0.00658185
TRBV13-2	TRBJ2-5	CASGGNRVNQDTQYF	5868	0.0795365		TRBV12-1	TRBJ1-5	CASSYRGEEGNQAPLF	6604	0.0863521		TRBV13-2	TRBJ2-7	CASGPRDRGSYEQYF	5568	0.0795145		TRBV16	TRBJ1-4	CASSLDPGTNERLF	3231	0.0521121		TRBV12-2	TRBJ2-7	CASSSGTGGAREQYF	524	0.00647071
TRBV26	TRBJ2-5	CASSPGGSNQDTQYF	5860	0.0794281		TRBV13-3	TRBJ1-1	CASSERFGTEVF	6579	0.0860252		TRBV13-1	TRBJ1-3	CASSGEGARALYF	5335	0.0761872		TRBV13-2	TRBJ2-7	CASGSGGEEQYF	3155	0.0508863		TRBV13-2	TRBJ1-2	CASSDAAENSDYTF	515	0.00635957
TRBV13-3	TRBJ2-3	CASSDQGASAETLYF	5829	0.0790079		TRBV1	TRBJ1-5	CSATGDNNQAPLF	6576	0.085986		TRBV5	TRBJ2-7	CASSQDAGAFSYEQYF	5208	0.0743735		TRBV16	TRBJ1-3	CASSLDGNTLYF	3152	0.0508379		TRBV5	TRBJ2-5	CASSQDGGAQDTQYF	514	0.00634722
TRBV26	TRBJ1-4	CASSRQNERLF	5809	0.0787368		TRBV5	TRBJ1-1	CASSQDGQGAQVF	6527	0.0853453		TRBV5	TRBJ1-3	CASSQDGGVGNTLYF	5203	0.0743021		TRBV16	TRBJ2-2	CASSSGPANTGQLYF	3116	0.0502572		TRBV5	TRBJ1-1	CASSLQGSHPEVF	511	0.00631018
TRBV13-3	TRBJ1-2	CASSEGQGNSDYTF	5808	0.0787233		TRBV15	TRBJ2-5	CASSFAGGQDTQYF	6527	0.0853453		TRBV13-2	TRBJ1-5	CASGRDRGDNQAPPF	5202	0.0742878		TRBV13-2	TRBJ1-4	CASGDVTNERLF	3083	0.049725		TRBV15	TRBJ1-1	CVSSLDRANTEVF	509	0.00628548
TRBV29	TRBJ1-6	CASSSRQGRNSPLYF	5796	0.0785606		TRBV1	TRBJ2-5	CSGGQGGDTQYF	6518	0.0852276		TRBV13-2	TRBJ1-2	CASGDQTNSDYTF	5092	0.072717		TRBV29	TRBJ2-2	CASSFSGANTGQLYF	3065	0.0494347		TRBV13-2	TRBJ1-2	CASSDEGGANSDYTF	505	0.00623608
TRBV13-3	TRBJ2-3	CASSDTGGEGAETLYF	5794	0.0785335		TRBV13-2	TRBJ2-2	CATGLQGDTGQLYF	6499	0.0849792		TRBV29	TRBJ1-5	CASSSGTGDNQAPLF	5041	0.0719887		TRBV29	TRBJ1-6	CASSLEYNSPLYF	3059	0.0493379		TRBV5	TRBJ2-7	CASSPDWGGYEQYF	494	0.00610025
TRBV12-1	TRBJ2-7	CASSLARRDNYEQYF	5791	0.0784929		TRBV1	TRBJ1-3	CSADQNSGNTLYF	6493	0.0849007		TRBV31	TRBJ2-3	CAWSLGGGSAETLYF	4989	0.0712461		TRBV13-2	TRBJ1-5	CASGEGYNNQAPLF	3037	0.0489831		TRBV13-1	TRBJ1-3	CAGSAGQGAGNTLYF	491	0.0060632
TRBV15	TRBJ2-7	CASSRTGYEQYF	5780	0.0783438		TRBV1	TRBJ1-3	CSADLGGHAGNTLYF	6490	0.0848615		TRBV13-1	TRBJ1-1	CASSDGRNTEVF	4964	0.070889		TRBV16	TRBJ1-2	CASSPGGSDYTF	3012	0.0485799		TRBV13-2	TRBJ1-2	CASSDADRNSDYTF	490	0.00605085
TRBV13-3	TRBJ1-2	CASRTTNSDYTF	5780	0.0783438		TRBV5	TRBJ2-1	CASSPGLVGEQF	6486	0.0848092		TRBV13-2	TRBJ2-7	CASGSYEQYF	4931	0.0704178		TRBV16	TRBJ2-2	CASSFRDRENTGQLYF	2982	0.048096		TRBV5	TRBJ1-1	CASRQINTEVF	483	0.00596441
TRBV15	TRBJ2-7	CASSLWGGSSYEQYF	5778	0.0783166		TRBV26	TRBJ1-6	CASSLYETNNSPLYF	6484	0.0847831		TRBV13-1	TRBJ2-1	CASSDAARNYAEQF	4928	0.0703749		TRBV1	TRBJ1-4	CGADANNERLF	2919	0.0470799		TRBV1	TRBJ2-4	CGGDNSQNTLYF	482	0.00595206
TRBV13-2	TRBJ2-5	CASGDGTVNQDTQYF	5766	0.078154		TRBV1	TRBJ2-7	CSADSYEQYF	6484	0.0847831		TRBV20	TRBJ2-7	CGARDWDSYEQYF	4886	0.0697752		TRBV16	TRBJ2-7	CASSLETGGYEQYF	2840	0.0458057		TRBV3	TRBJ2-5	CASSLTGGDTQYF	481	0.00593972
TRBV26	TRBJ2-7	CASSLLGGYEQYF	5754	0.0779913		TRBV1	TRBJ2-7	CSADFGGREQYF	6466	0.0845477		TRBV13-1	TRBJ2-4	CASSGTTSQNTLYF	4793	0.0684471		TRBV13-2	TRBJ2-5	CASGGTGDTQYF	2836	0.0457412		TRBV13-2	TRBJ2-7	CASSGLGEGEQYF	472	0.00582858
TRBV12-1	TRBJ1-6	CASSLPGQGNSPLYF	5744	0.0778558		TRBV1	TRBJ2-3	CSAVWGETLYF	6454	0.0843908		TRBV13-2	TRBJ2-5	CASGLGGRGQDTQYF	4748	0.0678044		TRBV16	TRBJ1-3	CASSSDNSGNTLYF	2810	0.0453218		TRBV13-2	TRBJ1-3	CASGDGDSSGNTLYF	472	0.00582858
TRBV5	TRBJ2-5	CASSQAGGQDTQYF	5736	0.0777474		TRBV5	TRBJ2-7	CASSPYWGSSYEQYF	6451	0.0843516		TRBV13-2	TRBJ2-7	CASGAAGTGGPLSYEQYF	4739	0.0676759		TRBV16	TRBJ1-3	CASSLDRGSGNTLYF	2804	0.0452251		TRBV5	TRBJ2-3	CASSQDGGAVAGTLYF	470	0.00580388
TRBV5	TRBJ2-3	CASSPRSSAETLYF	5726	0.0776118		TRBV1	TRBJ1-4	CSADMGGTNERLF	6448	0.0843123		TRBV13-2	TRBJ1-4	CASGDAGRANERLF	4594	0.0656052		TRBV5	TRBJ2-3	CASSGDWGTSAETLYF	2796	0.045096		TRBV1	TRBJ2-4	CSGDNSQDTLYF	461	0.00569274
TRBV15	TRBJ2-1	CASSLPGNYAEQF	5718	0.0775034		TRBV1	TRBJ1-1	CSADTPGKTEVF	6445	0.0842731		TRBV31	TRBJ1-5	CAWSLGGDQAPLF	4379	0.0625349		TRBV16	TRBJ2-3	CASSLGGRAETLYF	2779	0.0448219		TRBV1	TRBJ1-5	CSADQEAPPF	456	0.005631
TRBV13-3	TRBJ2-7	CASSDASGDEQYF	5715	0.0774627		TRBV1	TRBJ1-1	CSADSRAVF	6441	0.0842208		TRBV13-1	TRBJ2-2	CASSDRGRRTGQLYF	4325	0.0617637		TRBV29	TRBJ2-2	CASSPHWGLNTGQLYF	2769	0.0446606		TRBV31	TRBJ2-1	CAWSLTGGVYAE_F	446	0.00550751
TRBV5	TRBJ2-1	CASSQRDGYAEQF	5680	0.0769883		TRBV1	TRBJ2-5	CSGTGGDTQYF	6431	0.08409		TRBV16	TRBJ1-1	CASSLEGGQDTEVF	4308	0.061521		TRBV29	TRBJ2-5	CASTPDWGQDTQYF	2761	0.0445315		TRBV5	TRBJ1-1	CASSLKTNSNIEVF	438	0.00540872
TRBV15	TRBJ2-7	CASRFWGGSSYEQYF	5671	0.0768663		TRBV29	TRBJ1-1	CASSLSSFTEVF	6424	0.0839985		TRBV13-2	TRBJ2-5	CASGQGNQDTQYF	4302	0.0614353		TRBV13-1	TRBJ1-2	CASSPGANSDYTF	2742	0.0442251		TRBV13-2	TRBJ2-1	CASSGGGNYAEQF	431	0.00532228
TRBV5	TRBJ2-1	CASSQPDRGRF	5670	0.0768528		TRBV13-3	TRBJ1-2	CASSAGANSDYTF	6416	0.0838939		TRBV13-2	TRBJ1-4	CASGDASNDRLF	4182	0.0597216		TRBV29	TRBJ1-4	CASSLGTGVSNERLF	2676	0.0431606		TRBV13-2	TRBJ1-1	CASSLKTNSNTEVF	427	0.00527289
TRBV13-3	TRBJ2-1	CASRDRLNYAEQF	5670	0.0768528		TRBV13-2	TRBJ2-4	CASGRQNTLYF	6390	0.0835539		TRBV31	TRBJ1-5	CAWSRTGNNQAPLF	4064	0.0580365		TRBV16	TRBJ1-3	CASSLVDSGNTLYF	2641	0.0425961		TRBV1	TRBJ2-5	CTRSADQSGGGTQYF	424	0.00523584
TRBV5	TRBJ2-1	CASSQDMGRAEQF	5662	0.0767443		TRBV5	TRBJ2-3	CASRRLGTSAETLYF	6385	0.0834886		TRBV13-2	TRBJ1-4	CASGDAGPNERLF	3984	0.056894		TRBV13-2	TRBJ2-1	CASGDETGGAEQF	2626	0.0423541		TRBV5	TRBJ2-5	CASSQGGREQYF	423	0.00522349
TRBV15	TRBJ2-2	CASSLQGANTGQLYF	5661	0.0767308		TRBV1	TRBJ1-1	CSADQDAEVF	6381	0.0834363		TRBV13-1	TRBJ1-4	CASSDAQGRGERLF	3888	0.0555231		TRBV13-1	TRBJ1-6	CASSDAGDSPPYF	2606	0.0420316		TRBV15	TRBJ1-1	CASSLETGNTEVF	423	0.00522349
TRBV26	TRBJ2-7	CASSPGGVSYEQYF	5659	0.0767037		TRBV1	TRBJ1-1	CSADGAEVF	6357	0.0831224		TRBV16	TRBJ1-1	CASSLDAGANTEVF	3841	0.0548519		TRBV13-2	TRBJ1-2	CASGDPGQGSDYTF	2587	0.0417251		TRBV15	TRBJ1-1	CASGLDRANTEVF	423	0.00522349
TRBV13-3	TRBJ2-2	CASSDWGANTGQLYF	5658	0.0766901		TRBV13-1	TRBJ2-7	CASSDFSSYEQYF	6357	0.0831224		TRBV13-1	TRBJ1-1	CASSDGGGTEVF	3826	0.0546377		TRBV13-3	TRBJ1-4	CASPDGISNERLF	2569	0.0414348		TRBV5	TRBJ1-4	CASSFSTVNERLF	418	0.00516175
TRBV1	TRBJ1-4	CSGDSNERLF	5636	0.0763919		TRBV1	TRBJ2-4	CSARLVSQNTLYF	6337	0.0828609		TRBV13-2	TRBJ1-4	CASGVGASNERLF	3807	0.0543664		TRBV16	TRBJ2-2	CASSLVANTGQLYF	2551	0.0411445		TRBV5	TRBJ1-1	CASSLETGNTEVF	417	0.0051494
TRBV26	TRBJ2-3	CASSLGGGGAETLYF	5634	0.0763648		TRBV1	TRBJ1-4	CSAVRGFSNERLF	6312	0.082534		TRBV1	TRBJ2-2	CSAVRGSNTGQLYF	3790	0.0541236		TRBV1	TRBJ1-4	CSADANNGRLF	2486	0.0400961		TRBV26	TRBJ2-7	CSLEIQSSEAGDSALYLRASSPGTGGYEQYF	417	0.0051494
TRBV13-3	TRBJ2-2	CASSLQGANTGQLYF	5622	0.0762022		TRBV5	TRBJ2-3	CASSQEEGAETLYF	6304	0.0824294		TRBV31	TRBJ1-6	CAWSRQGAYNSPLYF	3772	0.0538665		TRBV13-2	TRBJ2-7	CASGDARAGEQYF	2462	0.039709		TRBV1	TRBJ2-4	CSGDNSQNTLHF	416	0.00513705
TRBV1	TRBJ1-2	CSATDSDYTF	5618	0.076148		TRBV15	TRBJ1-4	CASSSDRGVSNERLF	6304	0.0824294		TRBV14	TRBJ2-1	CASSSWGNYAEQF	3657	0.0522243		TRBV29	TRBJ1-3	CASSLGQLGNTLYF	2453	0.0395639		TRBV5	TRBJ1-3	CASSPNPGNTLYF	414	0.00511235
TRBV13-2	TRBJ2-5	CASGDAGGVNQDTQYF	5616	0.0761209		TRBV1	TRBJ1-6	CSDSYNSPLYF	6276	0.0820633		TRBV16	TRBJ1-5	CASSLEQNNQAPLF	3589	0.0512532		TRBV13-2	TRBJ2-7	CASGDGGASYEQYF	2433	0.0392413		TRBV5	TRBJ2-5	CASSDRDQDTQYF	413	0.00510001
TRBV13-3	TRBJ1-4	CASSDTNERLF	5609	0.076026		TRBV26	TRBJ1-2	CASSLTGTNSDYTF	6247	0.0816841		TRBV13-2	TRBJ1-4	CASGGNERLF	3399	0.0485399		TRBV16	TRBJ2-7	CASSLDLREDEQYF	2421	0.0390478		TRBV31	TRBJ2-1	CAWSLTGGVYAEQSF	410	0.00506296
TRBV13-3	TRBJ2-4	CASSDRGGGQNTLYF	5605	0.0759718		TRBV26	TRBJ2-5	CASRDTINQDTQYF	6231	0.0814749		TRBV1	TRBJ2-2	CSAVRDSNTG_LYF	3373	0.0481686		TRBV29	TRBJ1-1	CASSLSGANTEVF	2376	0.038322		TRBV13-3	TRBJ2-3	CASSDARGPSAETLCF	410	0.00506296
TRBV1	TRBJ1-1	CSAEQSTEVF	5603	0.0759446		TRBV13-3	TRBJ2-7	CASTGTREQYF	6212	0.0812265		TRBV16	TRBJ1-5	CASSDSNQAPLF	3196	0.0456409		TRBV13-1	TRBJ1-2	CASSSGTANSDYTF	2371	0.0382413		TRBV13-2	TRBJ1-2	CASSDAGGGSDYTF	409	0.00505061
TRBV5	TRBJ1-6	CASSQERDSPLYF	5602	0.0759311		TRBV26	TRBJ2-5	CASSL_GGDQDTQYF	6211	0.0812134		TRBV13-1	TRBJ1-4	CASSDDGGSNERLF	3125	0.044627		TRBV15	TRBJ2-1	CASSPWDWGYAERF	2367	0.0381768		TRBV5	TRBJ1-1	CASNLKTNSNTEVF	407	0.00502591
TRBV26	TRBJ1-4	CASSLSGISNERLF	5600	0.075904		TRBV13-3	TRBJ1-6	CASSASYNSPLYF	6184	0.0808603		TRBV1	TRBJ2-2	CSAEGQGAGQLYF	3086	0.04407		TRBV1	TRBJ1-4	CSADANNERLLF	2345	0.037822		TRBV13-3	TRBJ2-7	CASSDWGNSYEQYF	407	0.00502591
TRBV5	TRBJ2-5	CASSPGQGEDTQYF	5542	0.0751178		TRBV26	TRBJ1-6	CASSHSYNSPLYF	6180	0.080808		TRBV13-2	TRBJ1-5	CASRAGTYNNQAPLF	3079	0.0439701		TRBV13-1	TRBJ1-3	CASSDAGQGAGNTLYF	2344	0.0378058		TRBV15	TRBJ1-1	CASSLDRATTEVF	403	0.00497652
TRBV29	TRBJ2-1	CASSSAGYAEQF	5534	0.0750094		TRBV26	TRBJ2-7	CASSLARGYEQYF	6178	0.0807819		TRBV13-2	TRBJ1-5	CTSRAGTYNNQAPLF	3065	0.0437701		TRBV1	TRBJ1-4	CSADASNERLF	2299	0.03708		TRBV12-2	TRBJ1-6	CASSLHNSYNSPLYF	401	0.00495182
TRBV13-2	TRBJ1-1	CASGGDRGRYTEVF	5530	0.0749552		TRBV5	TRBJ2-1	CASSQDTNYAEQF	6173	0.0807165		TRBV14	TRBJ2-7	CASRPGTGDYEQYF	2927	0.0417994		TRBV3	TRBJ2-7	CASSLGF	2267	0.0365639		TRBV5	TRBJ1-1	CARSLKTNSNTEVF	400	0.00493947
TRBV16	TRBJ1-2	CASSGTPNSDYTF	5528	0.0749281		TRBV1	TRBJ1-3	CSAEDSGNTLYF	6136	0.0802327		TRBV14	TRBJ1-3	CASKDRVGNTLYF	2840	0.040557		TRBV14	TRBJ2-7	CASSLGLDEQYF	2265	0.0365317		TRBV1	TRBJ1-3	CSIDSGNTLYF	398	0.00491477
TRBV15	TRBJ2-5	CASSTGTDQDTQYF	5527	0.0749145		TRBV13-3	TRBJ2-5	CASSERNNQDTQYF	6127	0.080115		TRBV13-1	TRBJ1-1	CASSDPREGNTEVF	2836	0.0404999		TRBV13-1	TRBJ1-2	CASSEGVNSDYTF	2236	0.0360639		TRBV1	TRBJ1-5	CSAGTGANQAPLF	397	0.00490243
TRBV26	TRBJ1-1	CASSLEGGGRNTEVF	5521	0.0748332		TRBV13-1	TRBJ1-2	CASRPGQANSDYTF	6108	0.0798666		TRBV14	TRBJ1-4	CASSLTLSNERLF	2809	0.0401143		TRBV14	TRBJ1-3	CASSAGAGNTLYF	2234	0.0360317		TRBV5	TRBJ1-1	CASSPGQYTEVF	395	0.00487773
TRBV1	TRBJ1-1	CSQNTEVF	5516	0.0747654		TRBV1	TRBJ1-1	CSADPDRREVF	6101	0.079775		TRBV3	TRBJ2-5	CASSSTGNNQDTQYF	2784	0.0397573		TRBV3	TRBJ2-1	CASSLGVEQF	2231	0.0359833		TRBV13-2	TRBJ1-1	CASSDVGEVF	394	0.00486538
TRBV16	TRBJ2-4	CASSLGSASQNTLYF	5516	0.0747654		TRBV13-2	TRBJ2-7	CASGDRLGGEQYF	6101	0.079775		TRBV14	TRBJ2-7	CASSFEVSEQYF	2761	0.0394288		TRBV13-1	TRBJ1-6	CAGSDAGDSPLYF	2230	0.0359672		TRBV13-2	TRBJ2-3	CASSDAQVAETLYF	393	0.00485303
TRBV1	TRBJ1-1	CSADYSTEVF	5507	0.0746434		TRBV5	TRBJ1-6	CASSQEAVYNSPLYF	6098	0.0797358		TRBV1	TRBJ2-1	CSAGRAGQF	2745	0.0392003		TRBV13-1	TRBJ1-6	CASSDAGGSPLYF	2229	0.035951		TRBV5	TRBJ1-1	CASSPTGSNTEVF	386	0.00476659
TRBV13-3	TRBJ2-1	CASSDAGGKAEQF	5502	0.0745757		TRBV16	TRBJ1-4	CASSLQISNERLF	6078	0.0794743		TRBV5	TRBJ1-2	CASSQDMHSDYTF	2630	0.0375581		TRBV14	TRBJ2-7	CASSRLGGEQYF	2188	0.0352897		TRBV1	TRBJ2-4	CRGDNSQNTLYF	386	0.00476659
TRBV26	TRBJ1-1	CASSYRDGTEVF	5501	0.0745621		TRBV15	TRBJ1-3	CASGTGAGNTLYF	6078	0.0794743		TRBV14	TRBJ2-1	CASRPTGGNYAEQF	2577	0.0368012		TRBV29	TRBJ2-7	CASSLSGTGGHEQYF	2185	0.0352414		TRBV31	TRBJ2-1	CAWSLTGGAYAEQF	383	0.00472954
TRBV13-2	TRBJ2-7	CASGALTGGSEQYF	5498	0.0745214		TRBV13-3	TRBJ2-5	CASSGTGGRTQYF	6056	0.0791866		TRBV14	TRBJ1-1	CASSPDSTEVF	2463	0.0351732		TRBV1	TRBJ1-4	CSANANNERLF	2099	0.0338543		TRBV13-1	TRBJ2-1	CASGGGQGNYAEQF	379	0.00468015
TRBV13-3	TRBJ2-7	CASSDDREEQYF	5491	0.0744266		TRBV1	TRBJ2-7	CSAGGGHSYEQYF	6054	0.0791605		TRBV14	TRBJ2-2	CASSPDWGGTGQLYF	2446	0.0349304		TRBV20	TRBJ1-2	CGARAVSNSDYTF	2096	0.0338059		TRBV15	TRBJ1-1	CASSLDRTNTEVF	378	0.0046678
TRBV5	TRBJ2-5	CASSQGLQDTQYF	5482	0.0743046		TRBV13-2	TRBJ1-1	CASGGQGNTEVF	6048	0.079082		TRBV14	TRBJ1-3	CASSPTDSGNTLYF	2411	0.0344306		TRBV1	TRBJ1-4	CSADANDERLF	2076	0.0334833		TRBV1	TRBJ2-4	CSGDNGQNTLYF	377	0.00465545
TRBV5	TRBJ2-3	CASSQEGDTLYF	5480	0.0742775		TRBV5	TRBJ2-7	CASSQGTEAYEQYF	6024	0.0787682		TRBV31	TRBJ1-5	CAWSLPNQAQHF	2404	0.0343306		TRBV14	TRBJ2-5	CASSRTGQDTQYF	2001	0.0322737		TRBV13-2	TRBJ2-1	CASGGGQGNYAEQSF	377	0.00465545
TRBV5	TRBJ2-3	CASSQGASAETLYF	5478	0.0742504		TRBV15	TRBJ1-1	CASSLRSTNTEVF	6014	0.0786375		TRBV14	TRBJ2-2	CASSFTPNTGQLYF	2359	0.033688		TRBV14	TRBJ2-7	CASSRDRGGEQYF	1992	0.0321285		TRBV1	TRBJ2-3	CSVGQGNSAETLHF	374	0.00461841
TRBV13-2	TRBJ2-5	CASGDDWGEDTQYF	5478	0.0742504		TRBV31	TRBJ2-3	CASPGWGPSAETLYF	6000	0.0784544		TRBV14	TRBJ1-2	CASSFTGGNSDYTF	2284	0.032617		TRBV29	TRBJ2-7	CASSFQGYEQYF	1985	0.0320156		TRBV1	TRBJ2-1	CSADGGNYAEQF	374	0.00461841
TRBV1	TRBJ2-3	CSADGAGPETLYF	5468	0.0741148		TRBV5	TRBJ2-2	CASSQDPDRGTGQLYF	5991	0.0783367		TRBV13-2	TRBJ1-1	CGETGGSTEVF	2265	0.0323456		TRBV3	TRBJ1-4	CASSLESISNERLF	1976	0.0318704		TRBV1	TRBJ2-3	CSVGQGNSAETQYF	370	0.00456901
TRBV13-2	TRBJ1-2	CASGDVPNSDYTF	5465	0.0740742		TRBV1	TRBJ1-4	CSAGQNERLF	5991	0.0783367		TRBV14	TRBJ1-4	CASSFGQSNERLF	2121	0.0302892		TRBV14	TRBJ2-1	CASSRLGVYAEQF	1917	0.0309189		TRBV15	TRBJ1-1	CASSFRTNTEVF	368	0.00454431
TRBV13-3	TRBJ2-4	CASSDAWVQNTLYF	5463	0.074047		TRBV5	TRBJ2-2	CASSQDRNTGQLYF	5964	0.0779837		TRBV14	TRBJ1-4	CASSTRDRGIERLF	2091	0.0298608		TRBV26	TRBJ1-1	CASSLRTGGTEVF	1899	0.0306285		TRBV5	TRBJ1-1	CASSLKTNSNTKVF	367	0.00453197
TRBV15	TRBJ2-1	CASSPNYAEQF	5429	0.0735862		TRBV31	TRBJ2-2	CAWSGTGANTGQLYF	5962	0.0779575		TRBV13-2	TRBJ1-2	CASGARTASDYTF	2078	0.0296751		TRBV14	TRBJ1-4	CASSSGTGNERLF	1899	0.0306285		TRBV13-3	TRBJ2-7	CASSDRDNSYEQYF	367	0.00453197
TRBV13-3	TRBJ2-1	CASSEWTGGARAEQF	5428	0.0735726		TRBV13-1	TRBJ1-5	CASSDRGRAPLF	5951	0.0778137		TRBV1	TRBJ2-2	CSAVRDSSTGQLYF	1978	0.0282471		TRBV3	TRBJ1-3	CASSLGRRSGNTLYF	1881	0.0303382		TRBV13-2	TRBJ2-3	CTCSVGQGNSAETLYF	367	0.00453197
TRBV26	TRBJ2-1	CASSLGDAEQF	5423	0.0735049		TRBV1	TRBJ1-1	CSSLNRGNTEVF	5950	0.0778006		TRBV3	TRBJ2-1	CASSLTGGYAEQF	1970	0.0281328		TRBV14	TRBJ1-4	CASSLRGSNERLF	1871	0.0301769		TRBV1	TRBJ2-3	CSVGQGNGAETLYF	364	0.00449492
TRBV16	TRBJ2-7	CASSLGTGRYEQYF	5409	0.0733151		TRBV1	TRBJ1-6	CSGDIYNSPLYF	5940	0.0776699		TRBV13-3	TRBJ1-2	CASSGQNSDYTF	1920	0.0274188		TRBV14	TRBJ2-4	CASSLTVSQNTLYF	1808	0.0291608		TRBV13-2	TRBJ1-6	CASSRQDYNSPLYF	363	0.00448257
TRBV31	TRBJ1-2	CAWSPSNSDYTF	5363	0.0726916		TRBV31	TRBJ1-6	CAWSTERDSPLYF	5930	0.0775391		TRBV13-2	TRBJ1-1	CASSDAQKDTEVF	1872	0.0267333		TRBV16	TRBJ2-7	CASSLVGGAREQYF	1805	0.0291124		TRBV1	TRBJ2-7	CSADLGGNERYF	362	0.00447022
TRBV13-3	TRBJ2-3	CASSDRGGGAETLYF	5361	0.0726645		TRBV13-3	TRBJ1-6	CASSVRAYNSPLYF	5929	0.077526		TRBV3	TRBJ2-5	CASSLGLGTQDTQYF	1801	0.0257194		TRBV12-1	TRBJ2-7	CASSLDKTYEQYF	1795	0.0289511		TRBV1	TRBJ1-5	CSAGTGVNQAPPF	361	0.00445787
TRBV16	TRBJ2-7	CASSLVGGDEQYF	5357	0.0726103		TRBV13-2	TRBJ2-3	CASGERGGAETLYF	5929	0.077526		TRBV3	TRBJ2-1	CASSLGGGDNYAEQF	1761	0.0251482		TRBV14	TRBJ2-5	CASSFNWGINQDTQYF	1792	0.0289028		TRBV1	TRBJ2-4	CSGDNS_NTLYF	354	0.00437143
TRBV13-3	TRBJ1-2	CASSARQGNSDYTF	5353	0.0725561		TRBV13-2	TRBJ2-4	CASGDAGTGGAQNTLYF	5922	0.0774345		TRBV3	TRBJ2-1	CASSLGLGGNYAEQF	1746	0.024934		TRBV5	TRBJ2-7	CASSQDPLGGGYEQYF	1785	0.0287899		TRBV5	TRBJ1-1	CASSLKTKSNTEVF	353	0.00435908
TRBV26	TRBJ1-1	CASSLRTGGTEVF	5347	0.0724747		TRBV15	TRBJ2-7	CASSLGGEQYF	5915	0.077343		TRBV3	TRBJ2-1	CASSLLGGQGYAEQF	1669	0.0238344		TRBV1	TRBJ1-4	CSADANNEK_SF	1774	0.0286124		TRBV5	TRBJ1-1	CSLKTNSNTEVF	352	0.00434674
TRBV16	TRBJ2-3	CASSPGSSAETLYF	5310	0.0719732		TRBV1	TRBJ1-4	CSSSPERLF	5894	0.0770684		TRBV13-1	TRBJ2-7	CASGERQGNEQYF	1661	0.0237201		TRBV13-2	TRBJ2-5	CASGDAEGNQDTQYF	1755	0.028306		TRBV13-2	TRBJ2-4	CSGDNSQNTLYF	351	0.00433439
TRBV13-3	TRBJ2-2	CASSGTVPGQLYF	5309	0.0719597		TRBV13-2	TRBJ2-2	CASGSGYTGQLYF	5888	0.0769899		TRBV1	TRBJ2-4	CSGGGDQNTLYF	1634	0.0233346		TRBV14	TRBJ1-1	CASRARDSANTEVF	1744	0.0281286		TRBV13-2	TRBJ1-1	CASRPGQTEVF	351	0.00433439
TRBV13-2	TRBJ1-2	CASGDAINSDYTF	5305	0.0719055		TRBV31	TRBJ2-4	CAWSLTSQNTLYF	5870	0.0767546		TRBV3	TRBJ2-5	CASTLGVNQDTQYF	1585	0.0226348		TRBV13-1	TRBJ2-4	CASSDSQNTLYF	1742	0.0280963		TRBV13-2	TRBJ1-2	CAGGDRADYTF	350	0.00432204
TRBV13-3	TRBJ1-1	CASSWTQNTEVF	5284	0.0716208		TRBV5	TRBJ2-5	CASSSQGAAQDTQYF	5862	0.0766499		TRBV13-2	TRBJ2-7	CASSDVGYEQYF	1581	0.0225777		TRBV20	TRBJ1-3	CGARGTGVNSGNTLYF	1739	0.0280479		TRBV1	TRBJ2-4	CSADNRGQDTLYF	349	0.00430969
TRBV5	TRBJ1-1	CASSQGTDTEVF	5247	0.0711193		TRBV1	TRBJ2-2	CSAGSGQLYF	5857	0.0765846		TRBV1	TRBJ2-5	CSADNLGQDAQYF	1567	0.0223777		TRBV14	TRBJ1-4	CASKGTGANERLF	1719	0.0277254		TRBV13-2	TRBJ1-2	CASGDRADYAF	349	0.00430969
TRBV1	TRBJ1-2	CSADRGNSDYTF	5228	0.0708618		TRBV5	TRBJ2-5	CASSQALGGQDTQYF	5834	0.0762838		TRBV1	TRBJ1-6	CSADRDSYNPPLYF	1550	0.022135		TRBV14	TRBJ1-1	CASSPGQPEVF	1710	0.0275802		TRBV5	TRBJ1-4	CASSRDRSNERLF	348	0.00429734
TRBV13-3	TRBJ1-2	CASSDQQGRGSDYTF	5228	0.0708618		TRBV15	TRBJ2-4	CASRLGGRNTLYF	5831	0.0762446		TRBV3	TRBJ2-5	CASSPGPQDTQYF	1509	0.0215495		TRBV14	TRBJ2-5	CASSRRGLQDTQYF	1673	0.0269834		TRBV31	TRBJ2-1	CAWSLTGGVYAEQLF	346	0.00427264
TRBV5	TRBJ2-1	CASSHPTGDAEQF	5227	0.0708482		TRBV5	TRBJ2-2	CASSQDWVNTGQLYF	5828	0.0762054		TRBV1	TRBJ2-4	CTYSADQGRQNTLYF	1509	0.0215495		TRBV14	TRBJ2-2	CASSLGQGPGQLYF	1636	0.0263867		TRBV14	TRBJ1-1	CASSPGATEVF	345	0.00426029
TRBV13-3	TRBJ2-7	CASSDAGWGYEQYF	5227	0.0708482		TRBV1	TRBJ2-2	CSADGLGGPGQLYF	5828	0.0762054		TRBV3	TRBJ2-1	CASSLGGGNNYAEQF	1436	0.020507		TRBV14	TRBJ2-7	CASSLGSEQYF	1602	0.0258383		TRBV13-2	TRBJ1-2	CASGDGADYTF	344	0.00424795
TRBV30	TRBJ2-4	CSSRGWGTSQNTLYF	5221	0.0707669		TRBV15	TRBJ2-7	CASRDSYEQYF	5825	0.0761661		TRBV5	TRBJ2-2	CASSQTENTGQLYF	1374	0.0196216		TRBV3	TRBJ2-1	CASSLGQYNYAEQF	1553	0.025048		TRBV1	TRBJ2-3	CTYSVGQGNSAETLYF	343	0.0042356
TRBV12-1	TRBJ1-4	CASSLGQGSERLF	5204	0.0705365		TRBV5	TRBJ2-5	CASSPTGGNQDTQYF	5818	0.0760746		TRBV5	TRBJ2-1	CASSQDQRGEQYF	1335	0.0190646		TRBV1	TRBJ1-4	CSADANNERLSF	1515	0.0244351		TRBV15	TRBJ1-3	CASSPNPGNTLYF	340	0.00419855
TRBV5	TRBJ2-1	CASSQEGTGAEQYF	5199	0.0704687		TRBV13-3	TRBJ1-2	CASSGTGGGSDYTF	5817	0.0760615		TRBV13-1	TRBJ1-1	CASGETGGSTEVF	1243	0.0177508		TRBV13-1	TRBJ1-6	CASSDTGDSPLYF	1508	0.0243222		TRBV15	TRBJ1-1	CASSSDRANTEVF	339	0.0041862
TRBV31	TRBJ1-6	CAWSLPDNSPLYF	5194	0.0704009		TRBV15	TRBJ2-7	CASRGVSYEQYF	5806	0.0759177		TRBV3	TRBJ2-7	CASSLGGQSYEQYF	1231	0.0175795		TRBV13-1	TRBJ1-6	CASGDAGDSPLYF	1508	0.0243222		TRBV15	TRBJ1-1	CANSLDRANTEVF	339	0.0041862
TRBV29	TRBJ2-5	CASSKGQKDTQYF	5161	0.0699537		TRBV1	TRBJ1-1	CSADKGEVF	5790	0.0757085		TRBV1	TRBJ1-4	CSADQGSNERLF	1217	0.0173795		TRBV1	TRBJ1-4	CSADANNERSF	1502	0.0242254		TRBV15	TRBJ1-2	CASSLDRANSDYTF	337	0.00416151
TRBV15	TRBJ2-1	CASSSQGFYAEQF	5158	0.069913		TRBV5	TRBJ2-7	CASSQDGTTSYEQYF	5784	0.07563		TRBV13-2	TRBJ1-1	CASSEGQRNTEVF	1169	0.0166941		TRBV14	TRBJ1-4	CASSPGQNFSNERLF	1490	0.0240319		TRBV1	TRBJ1-5	CTRSAGTGVNQAPLF	336	0.00414916
TRBV5	TRBJ2-1	CASSLWGGYAEQF	5144	0.0697232		TRBV13-1	TRBJ2-3	CASSEGLGGAETLYF	5763	0.0753554		TRBV14	TRBJ1-4	CASSSPGQGNERLF	1148	0.0163942		TRBV3	TRBJ2-5	CASSPGTGVDTQYF	1487	0.0239835		TRBV26	TRBJ1-1	CASSLKTNSNTEVF	333	0.00411211
TRBV1	TRBJ1-1	CSADVGGDTEVF	5138	0.0696419		TRBV13-3	TRBJ2-1	CASSPGTGTAEQF	5756	0.0752639		TRBV20	TRBJ2-7	CGAHRSSYEQYF	1143	0.0163228		TRBV13-1	TRBJ1-2	CASSDGRGRGSDYTF	1466	0.0236448		TRBV1	TRBJ2-1	CTRSAGHNNYAEQF	333	0.00411211
TRBV15	TRBJ1-4	CASRTGTGNERLF	5135	0.0696012		TRBV13-2	TRBJ2-1	CASGELGNYAEQF	5732	0.0749501		TRBV13-2	TRBJ2-2	CASRQANTGQLYF	1134	0.0161942		TRBV3	TRBJ2-3	CASSSYSSAETLYF	1419	0.0228867		TRBV1	TRBJ1-5	CTRSADQEAPLF	330	0.00407506
TRBV1	TRBJ1-1	CSAEQNTEVF	5134	0.0695877		TRBV5	TRBJ2-1	CASSPDNNYAEQF	5727	0.0748847		TRBV13-2	TRBJ2-2	CTSGETGANTGQLYF	1127	0.0160943		TRBV14	TRBJ2-5	CASSLGEKDTQYF	1397	0.0225319		TRBV13-2	TRBJ2-7	CASSDRTGGVYEQYF	328	0.00405037
TRBV16	TRBJ2-5	CASSPGTEDTQYF	5123	0.0694386		TRBV13-2	TRBJ2-5	CASGVDSQDTQYF	5727	0.0748847		TRBV5	TRBJ2-3	CASSQDWASAETPYF	1008	0.0143949		TRBV13-1	TRBJ1-6	CASSDAGDPPLYF	1388	0.0223867		TRBV26	TRBJ1-1	CASSLDRANTEVF	325	0.00401332
TRBV5	TRBJ2-5	CASSPYWGLQDTQYF	5116	0.0693437		TRBV1	TRBJ1-5	CSAESQNNNQAPLF	5719	0.0747801		TRBV13-2	TRBJ1-1	CAGGETGGSTEVF	974	0.0139093		TRBV16	TRBJ2-4	CASSAGLGQGTLYF	1386	0.0223545		TRBV1	TRBJ2-3	CSVGQGNSAETLCF	323	0.00398862
TRBV13-3	TRBJ2-7	CASSEGQVSYEQYF	5100	0.0691268		TRBV16	TRBJ2-5	CASSPSDWDQDTQYF	5683	0.0743094		TRBV13-1	TRBJ2-5	CASSRDIQDTQYF	955	0.013638		TRBV3	TRBJ2-1	CASSTTGERAEQF	1332	0.0214835		TRBV1	TRBJ2-3	CSMGQGNSAETLYF	319	0.00393923
TRBV13-1	TRBJ2-7	CASSPDWGGYEQYF	5100	0.0691268		TRBV13-3	TRBJ2-5	CASSDKGGRNTQYF	5676	0.0742179		TRBV1	TRBJ2-5	CGAGASQDTQYF	938	0.0133952		TRBV14	TRBJ1-2	CATGTGGDSDYTF	1295	0.0208868		TRBV1	TRBJ2-3	CSVRQGNSAETLYF	317	0.00391453
TRBV13-3	TRBJ2-1	CASSLRDREYAEQF	5090	0.0689913		TRBV13-2	TRBJ2-4	CASGAPSQNTLYF	5676	0.0742179		TRBV5	TRBJ2-4	CASSQEVGNTLYF	934	0.0133381		TRBV3	TRBJ1-4	CASSLGGANERLF	1293	0.0208545		TRBV13-2	TRBJ1-5	CASSAGTNNNQAPLF	313	0.00386514
TRBV13-3	TRBJ1-1	CASSDAGSNTEVF	5085	0.0689235		TRBV16	TRBJ2-4	CASIRDWGVQNTLYF	5663	0.0740479		TRBV1	TRBJ2-7	CSARDWGDGQYF	922	0.0131667		TRBV1	TRBJ1-4	CSADTNNERLF	1290	0.0208061		TRBV15	TRBJ1-1	CASSGTSTEVF	309	0.00381574
TRBV26	TRBJ1-5	CASRTGGNQAPLF	5080	0.0688558		TRBV5	TRBJ2-5	CASSPPGGDQDTQYF	5649	0.0738648		TRBV1	TRBJ2-7	CSARDWGDERYF	916	0.0130811		TRBV3	TRBJ2-3	CARGRRIAETLYF	1241	0.0200158		TRBV13-2	TRBJ1-2	CASGGRADYTF	308	0.00380339
TRBV5	TRBJ2-4	CASSQDMTGGENTLYF	5061	0.0685982		TRBV1	TRBJ1-1	CSGTGDTEVF	5630	0.0736164		TRBV1	TRBJ1-1	CSAAQGDTEVF	906	0.0129383		TRBV3	TRBJ2-4	CASSSQGVQNTLYF	1235	0.019919		TRBV5	TRBJ1-1	CASSLKTNSNTEIF	307	0.00379105
TRBV1	TRBJ1-1	CSAEDSYTEVF	5057	0.068544		TRBV5	TRBJ2-7	CASSQEDRAYEQYF	5618	0.0734595		TRBV1	TRBJ2-2	CTRSAVRDSNTGQLYF	885	0.0126384		TRBV3	TRBJ1-4	CASSPDRISNERLF	1229	0.0198223		TRBV1	TRBJ2-5	CSAPRDPGGDTQYF	307	0.00379105
TRBV13-1	TRBJ2-7	CASSDPTGSSYEQYF	5037	0.0682729		TRBV1	TRBJ1-1	CSADANTEVF	5612	0.073381		TRBV13-1	TRBJ1-4	CASGDASNERLF	882	0.0125955		TRBV14	TRBJ1-1	CASSPGQGEVF	1229	0.0198223		TRBV1	TRBJ1-5	CSAGTGINQAPLF	307	0.00379105
TRBV5	TRBJ2-5	CASSPRLRGGQDTQYF	5034	0.0682323		TRBV1	TRBJ1-3	CSAPHKPSGNTLYF	5600	0.0732241		TRBV13-2	TRBJ1-3	CASGRQGDFGNTLYF	857	0.0122385		TRBV17	TRBJ2-2	CASSPGLGGDTGQLYF	1209	0.0194997		TRBV5	TRBJ1-1	CASSLKTNANTEVF	301	0.00371695
TRBV5	TRBJ2-5	CASSQDSNQDTQYF	5031	0.0681916		TRBV5	TRBJ1-1	CASSQGQGVTEVF	5581	0.0729757		TRBV13-2	TRBJ1-1	CASGGTGGSTEVF	844	0.0120529		TRBV1	TRBJ1-4	CSTDANNERLF	1194	0.0192578		TRBV1	TRBJ1-5	CSADREAPLF	301	0.00371695
TRBV1	TRBJ1-4	CSAGGGGNERLF	5022	0.0680696		TRBV5	TRBJ1-1	CASSAGQGNTEVF	5581	0.0729757		TRBV31	TRBJ1-3	CAWSLRVGNTLYF	791	0.011296		TRBV12-1	TRBJ2-7	CASSPDKSYEQYF	1194	0.0192578		TRBV1	TRBJ1-5	CSADRGAAPPF	300	0.0037046
TRBV13-3	TRBJ2-2	CASRRTANTGQLYF	5015	0.0679747		TRBV13-3	TRBJ2-1	CASSDWGGYAEQF	5565	0.0727665		TRBV31	TRBJ2-4	CA_SLVGGQNTLYF	790	0.0112817		TRBV3	TRBJ1-4	CASSSSRDRNERLF	1183	0.0190803		TRBV14	TRBJ2-3	CASSFRDWGSSAETLYF	300	0.0037046
TRBV13-3	TRBJ1-1	CASKGQNTEVF	5008	0.0678798		TRBV31	TRBJ2-2	CAWSLGANTGQLYF	5564	0.0727534		TRBV20	TRBJ2-5	CGALLKDTQYF	752	0.010739		TRBV1	TRBJ1-4	CSADVNNERLF	1181	0.0190481		TRBV13-3	TRBJ2-5	CASNDRDQDTQYF	299	0.00369226
TRBV5	TRBJ2-1	CASSRPGQNYAEQF	5003	0.0678121		TRBV31	TRBJ2-2	CAWSLGSTGQLYF	5562	0.0727272		TRBV13-2	TRBJ2-7	CASSDLGGEQYF	725	0.0103535		TRBV14	TRBJ1-2	CASSSGHTNSDYTF	1171	0.0188868		TRBV5	TRBJ2-1	CASSQARDRYAEQSF	296	0.00365521
TRBV13-3	TRBJ2-2	CASSDARGGTGQLYF	4987	0.0675952		TRBV13-3	TRBJ2-7	CASTGGPYEQYF	5539	0.0724265		TRBV1	TRBJ2-5	CSDPGGADRDTQYF	712	0.0101678		TRBV3	TRBJ2-7	CASSLEGGAHEQYF	1155	0.0186287		TRBV13-3	TRBJ1-1	CASSGTSTEVLF	296	0.00365521
TRBV13-3	TRBJ1-1	CASSVPGQGETEVF	4985	0.0675681		TRBV5	TRBJ1-6	CASSQDGTAYNSPLYF	5533	0.072348		TRBV13-2	TRBJ1-3	CASGEGVTDPNSGNTLYF	707	0.0100964		TRBV13-2	TRBJ2-4	CASGDAGLGGRQNTLYF	1138	0.0183545		TRBV13-2	TRBJ2-7	CASSTHERAYEQYF	296	0.00365521
TRBV16	TRBJ2-1	CASSAGGGNYAEQF	4983	0.067541		TRBV31	TRBJ1-6	CAWNRDRNSPLYF	5517	0.0721388		TRBV30	TRBJ2-7	CSSRLGEREQYF	677	0.00966799		TRBV13-1	TRBJ1-6	CASSDAGDSPLHF	1138	0.0183545		TRBV13-2	TRBJ1-1	CASSLDRANTEVF	296	0.00365521
TRBV15	TRBJ2-7	CASSPGLGGYEQYF	4976	0.0674461		TRBV13-3	TRBJ1-6	CASSDPNSPLYF	5509	0.0720342		TRBV13-2	TRBJ1-1	CASGETGGPTEVF	673	0.00961086		TRBV5	TRBJ1-5	CASSQDLSYNNQAPPF	1137	0.0183384		TRBV5	TRBJ2-1	CASSGGGNYAEQF	294	0.00363051
TRBV12-1	TRBJ2-4	CASSPGPSQNTLYF	4970	0.0673648		TRBV5	TRBJ2-3	CASSQTTSAETLYF	5507	0.0720081		TRBV1	TRBJ2-4	CSADQGRQNALYF	670	0.00956802		TRBV3	TRBJ2-3	CASSSQGSSAETLYF	1112	0.0179352		TRBV1	TRBJ2-5	CSASRDPGGGTQYF	294	0.00363051
TRBV13-3	TRBJ2-7	CASSVQAYEQYF	4965	0.067297		TRBV5	TRBJ2-7	CASSPGQGEGEQYF	5497	0.0718773		TRBV13-2	TRBJ2-7	CASGERRGNEQYF	667	0.00952518		TRBV1	TRBJ1-4	CSVDANNERLF	1109	0.0178868		TRBV5	TRBJ1-1	CAGSQGQGDTEVF	293	0.00361816
TRBV13-1	TRBJ2-7	CASSDDWGTYEQYF	4963	0.0672699		TRBV31	TRBJ1-1	CAWRQANTEVF	5485	0.0717204		TRBV1	TRBJ2-2	CSAVRDSNTGQPYF	664	0.00948234		TRBV3	TRBJ2-7	CASSLDRISYEQYF	1104	0.0178062		TRBV5	TRBJ1-4	CASSLGQTSNERLF	289	0.00356877
TRBV16	TRBJ2-3	CASSFLREPSAETLYF	4962	0.0672564		TRBV5	TRBJ1-6	CASRTGDNSPLYF	5479	0.0716419		TRBV13-1	TRBJ1-4	CASSDAANERLF	664	0.00948234		TRBV3	TRBJ1-3	CASSPQGNGNTLYF	1095	0.017661		TRBV1	TRBJ1-5	CSAGTGVDQAPLF	289	0.00356877
TRBV15	TRBJ1-2	CASSDRGGANSDYTF	4962	0.0672564		TRBV13-2	TRBJ2-4	CASGEPGQGRSQNTLYF	5458	0.0713673		TRBV13-2	TRBJ2-7	CASSDNQGTYEQYF	661	0.0094395		TRBV1	TRBJ1-4	CNADANNERLF	1062	0.0171288		TRBV13-2	TRBJ2-7	CASSGQGHSYEQYF	287	0.00354407
TRBV5	TRBJ1-4	CASSQGQGNERLF	4956	0.067175		TRBV1	TRBJ1-6	CSASGTGDSPLYF	5457	0.0713543		TRBV1	TRBJ2-4	CSADRGRQNTLYF	659	0.00941094		TRBV3	TRBJ2-7	CASSLALGGADEQYF	1052	0.0169675		TRBV5	TRBJ1-1	CASSLKTNSNTEVYF	286	0.00353172
TRBV13-3	TRBJ2-1	CASSDASWGGARAEQF	4956	0.067175		TRBV13-2	TRBJ1-5	CASGAQGSNQAPLF	5451	0.0712758		TRBV13-2	TRBJ1-1	CASGEAGGSTEVF	658	0.00939665		TRBV14	TRBJ2-4	CASSPLGGTSQNTLYF	1045	0.0168546		TRBV31	TRBJ2-1	CARSLTGGVYAEQF	284	0.00350703
TRBV29	TRBJ1-4	CASSRSISNERLF	4951	0.0671073		TRBV5	TRBJ2-5	CASSQDPRGEDTQYF	5445	0.0711974		TRBV1	TRBJ2-4	CSADQGRQSTLYF	638	0.00911104		TRBV13-3	TRBJ1-3	CASSWDSSGNTLYF	1039	0.0167578		TRBV26	TRBJ2-4	CASSPRGGQNTLYF	283	0.00349468
TRBV13-3	TRBJ1-4	CASSDGRGRSNERLF	4941	0.0669717		TRBV31	TRBJ2-3	CAWRGTSSAETLYF	5438	0.0711058		TRBV1	TRBJ1-6	CSADRDSYSSPLYF	629	0.00898252		TRBV3	TRBJ2-5	CASSFRGPEDTQYF	1006	0.0162255		TRBV13-2	TRBJ1-3	CASGDARTGRSGNTLYF	281	0.00346998
TRBV13-3	TRBJ2-1	CASSDWGDYAEQF	4940	0.0669582		TRBV13-2	TRBJ1-2	CASGVQTNSDYTF	5434	0.0710535		TRBV20	TRBJ2-1	CGASVLGNYAEQF	623	0.00889683		TRBV1	TRBJ1-4	CTYSADANNERLF	1005	0.0162094		TRBV13-3	TRBJ2-3	CSVGQGNSAETLYF	280	0.00345763
TRBV13-2	TRBJ1-2	CASGDARHPNSDYTF	4939	0.0669446		TRBV26	TRBJ1-1	CASSPATEVF	5419	0.0708574		TRBV1	TRBJ1-1	CSAGDTEIF	609	0.0086969		TRBV3	TRBJ2-7	CASSFRDWGYEQYF	997	0.0160804		TRBV1	TRBJ2-3	CSAARGGCF	279	0.00344528
TRBV5	TRBJ2-4	CASSQDDWGGSQNTLYF	4926	0.0667684		TRBV13-2	TRBJ1-1	CASGEGTITEVF	5416	0.0708182		TRBV1	TRBJ2-4	CSADQGRQNTSYF	605	0.00863978		TRBV13-1	TRBJ1-6	CASSDAGDSPLCF	965	0.0155643		TRBV16	TRBJ1-1	CASSLDRANTEVF	279	0.00344528
TRBV31	TRBJ2-7	CAWSQGGYEQYF	4921	0.0667006		TRBV1	TRBJ1-4	CSARNERLF	5409	0.0707266		TRBV13-2	TRBJ1-1	CASGETGGSTEVLF	604	0.0086255		TRBV3	TRBJ2-7	CASSFDNYEQYF	952	0.0153546		TRBV5	TRBJ1-6	CASRQAYNSPLYF	278	0.00343293
TRBV13-2	TRBJ2-5	CASGGTGGNQDTQYF	4878	0.0661178		TRBV31	TRBJ1-5	CARDSNQAQHF	5406	0.0706874		TRBV1	TRBJ1-1	CSVGDTEVF	600	0.00856838		TRBV14	TRBJ2-7	CASSPGLSYEQYF	944	0.0152256		TRBV5	TRBJ1-6	CASSFGTGGAGSPLYF	277	0.00342058
TRBV12-1	TRBJ2-2	CASSRRDGQLYF	4875	0.0660771		TRBV5	TRBJ2-5	CASSLRTVNQDTQYF	5399	0.0705959		TRBV1	TRBJ2-5	CSARDWGDEQYF	599	0.0085541		TRBV1	TRBJ1-4	CADANNERLF	940	0.015161		TRBV13-3	TRBJ1-3	CAGSWDGSGNTLYF	277	0.00342058
TRBV29	TRBJ1-1	CASSPDRNTEVF	4872	0.0660365		TRBV29	TRBJ2-4	CASSLGQGNTLYF	5396	0.0705567		TRBV1	TRBJ2-3	CSAEGGGASAETLYF	591	0.00843985		TRBV3	TRBJ2-5	CASSRLGVQDTQYF	928	0.0149675		TRBV1	TRBJ2-7	CGASGGEQYF	276	0.00340824
TRBV13-2	TRBJ2-3	CASGRLGSSAETLYF	4859	0.0658603		TRBV5	TRBJ2-1	CANSQGHYNYAEQF	5377	0.0703082		TRBV13-1	TRBJ2-1	CASRGGGDAEQF	590	0.00842557		TRBV17	TRBJ1-4	CASSSRSSNERLF	920	0.0148385		TRBV13-2	TRBJ2-7	CASSLLGQGGEQYF	275	0.00339589
TRBV26	TRBJ1-4	CASNQGGDERLF	4839	0.0655892		TRBV31	TRBJ2-4	CAWSPRLGETQNTLYF	5372	0.0702428		TRBV1	TRBJ1-4	CSADQGGNERSF	586	0.00836845		TRBV20	TRBJ2-1	CGARKRNYAEQF	913	0.0147256		TRBV30	TRBJ1-4	CSSTAALSNERLF	272	0.00335884
TRBV16	TRBJ2-4	CASSLEPGQKNTLYF	4836	0.0655485		TRBV15	TRBJ2-5	CASSFNNQDTQYF	5363	0.0701252		TRBV1	TRBJ1-6	CSADRDSYNSPPYF	581	0.00829705		TRBV13-2	TRBJ1-1	CASGDGANTEVLF	906	0.0146127		TRBV1	TRBJ2-7	CSTGSSLYF	271	0.00334649
TRBV12-1	TRBJ2-3	CASSSLGGSAETLYF	4835	0.065535		TRBV31	TRBJ2-2	CAWGQGANTGQLYF	5344	0.0698767		TRBV13-2	TRBJ2-7	CASGEGQGNEQYF	580	0.00828277		TRBV13-1	TRBJ1-6	CASSDVGDSPLYF	878	0.0141611		TRBV1	TRBJ2-4	CSEDNSQNTLYF	271	0.00334649
TRBV13-3	TRBJ2-7	CASSSGQYEQYF	4833	0.0655078		TRBV5	TRBJ1-1	CASSQDPGEATEVF	5339	0.0698113		TRBV13-1	TRBJ2-7	CASSDNQGAYEQYF	578	0.0082542		TRBV3	TRBJ2-7	CASSLAAAGTISYEQYF	865	0.0139514		TRBV1	TRBJ2-1	CSAGHSNYAEQF	271	0.00334649
TRBV13-3	TRBJ2-4	CASSTGQNTLYF	4829	0.0654536		TRBV5	TRBJ2-2	CASSPWGLRTGQLYF	5336	0.0697721		TRBV13-1	TRBJ2-1	CASSLGQDNYAEQF	573	0.0081828		TRBV12-1	TRBJ2-7	CASSLDWAGSYEQYF	854	0.013774		TRBV1	TRBJ2-4	CTYSGDNSQNTLYF	270	0.00333414
TRBV13-2	TRBJ2-5	CASGAGLGDTQYF	4825	0.0653994		TRBV15	TRBJ2-7	CASSRDRNSYEQYF	5315	0.0694975		TRBV13-2	TRBJ1-1	CASGETGGSTEAF	567	0.00809712		TRBV13-1	TRBJ1-6	CVSSDAGDSPLYF	841	0.0135643		TRBV13-3	TRBJ2-3	CASSDARGPSAETPYF	270	0.00333414
TRBV31	TRBJ2-7	CAWSPGQSYEQYF	4817	0.065291		TRBV31	TRBJ2-7	CAWSATDRGREQYF	5312	0.0694583		TRBV20	TRBJ2-3	CGARELGSAETLYF	565	0.00806856		TRBV29	TRBJ2-4	CASSRGVGQNTLYF	826	0.0133224		TRBV1	TRBJ1-3	CTRSINSGNTLYF	269	0.0033218
TRBV29	TRBJ1-4	CASSLSRPRGGNERLF	4817	0.065291		TRBV5	TRBJ2-5	CASSSDSQDTQYF	5310	0.0694321		TRBV1	TRBJ2-2	CSAVRDSNAGQLYF	557	0.00795431		TRBV14	TRBJ1-4	CASSLTHSNERLF	810	0.0130643		TRBV13-2	TRBJ1-3	CASSWDGSGNTLYF	268	0.00330945
TRBV5	TRBJ2-7	CASSQDWGYEQYF	4790	0.064925		TRBV13-2	TRBJ2-5	CASGDLGVQDTQYF	5270	0.0689091		TRBV1	TRBJ1-6	CTRSAGQYNSPLYF	557	0.00795431		TRBV17	TRBJ2-1	CASSRTGNYAEQF	796	0.0128385		TRBV1	TRBJ2-7	CSAPGGYGQYF	267	0.0032971
TRBV13-3	TRBJ2-5	CASSGLGGQDTQYF	4785	0.0648572		TRBV1	TRBJ1-4	CSPGGISNERLF	5249	0.0686345		TRBV13-1	TRBJ1-5	CASTGTGNQAPLF	539	0.00769726		TRBV13-1	TRBJ1-6	CASSDAGDSPLSF	788	0.0127095		TRBV15	TRBJ1-1	CTSSLDRANTEVF	267	0.0032971
TRBV13-3	TRBJ1-2	CASSRTANSDYTF	4779	0.0647759		TRBV13-2	TRBJ1-2	CASGDGTGGNSDYTF	5241	0.0685299		TRBV20	TRBJ2-1	CGARGYYAEQF	537	0.0076687		TRBV12-1	TRBJ2-7	CAGSLDKSYEQYF	785	0.0126611		TRBV5	TRBJ1-1	CASSLKTTSNTEVF	266	0.00328475
TRBV12-1	TRBJ1-4	CASSLHERLF	4770	0.0646539		TRBV26	TRBJ1-5	CASSQGQNNQAQHF	5223	0.0682946		TRBV13-2	TRBJ2-1	CASSDQSYAEQF	530	0.00756873		TRBV3	TRBJ1-4	CASSRTEISNERLF	774	0.0124837		TRBV13-3	TRBJ2-7	CASSDWDDSYEQYF	266	0.00328475
TRBV29	TRBJ2-4	CASRPYRGQNTLYF	4761	0.0645319		TRBV5	TRBJ2-3	CASSPTGGAETLYF	5222	0.0682815		TRBV13-2	TRBJ1-4	CASGGASNERLF	525	0.00749733		TRBV3	TRBJ2-5	CASSLEGAYQDTQYF	764	0.0123224		TRBV5	TRBJ2-3	CASSRGTNSAETLYF	265	0.0032724
TRBV13-2	TRBJ2-4	CASGDRTGGGQNTLYF	4753	0.0644235		TRBV13-2	TRBJ1-2	CASGDADRGYSDYTF	5214	0.0681769		TRBV20	TRBJ2-1	CGARDRDNYAEQF	520	0.00742593		TRBV13-1	TRBJ1-6	CASSDARDSPLYF	756	0.0121933		TRBV5	TRBJ1-1	CASSPGTNSNTEVF	264	0.00326005
TRBV13-3	TRBJ2-4	CASTDSQNTLYF	4751	0.0643964		TRBV5	TRBJ2-7	CASSQEGTGGSYEQYF	5210	0.0681246		TRBV13-2	TRBJ1-2	CASGDARGRSDSDYTF	509	0.00726884		TRBV1	TRBJ2-7	CTGSASGNEQYF	753	0.012145		TRBV13-3	TRBJ2-5	CASSDGDQDTQYF	263	0.0032477
TRBV15	TRBJ2-7	CASSQGEQYF	4743	0.064288		TRBV1	TRBJ2-7	CSGTGEQYF	5192	0.0678892		TRBV31	TRBJ1-2	CAWSPQGANSGYTF	505	0.00721172		TRBV12-1	TRBJ1-6	CASSDAGDSPLYF	751	0.0121127		TRBV13-3	TRBJ1-1	CAGSGTSTEVF	263	0.0032477
TRBV31	TRBJ2-4	CAWSLAGGSQNTLYF	4742	0.0642744		TRBV31	TRBJ1-2	CAWSGGANSDYTF	5191	0.0678761		TRBV1	TRBJ2-4	CGADLGRQNTLYF	504	0.00719744		TRBV13-3	TRBJ1-6	CASSDAGDSPLYF	743	0.0119837		TRBV5	TRBJ1-3	CASSWDGSGNTLYF	262	0.00323535
TRBV12-1	TRBJ2-7	CASSLVEQYF	4739	0.0642337		TRBV5	TRBJ2-5	CASSRRDRGQDTQYF	5186	0.0678107		TRBV20	TRBJ2-4	CGARRGSQNTLYF	491	0.00701179		TRBV13-1	TRBJ1-6	CTSSDAGDSPLYF	725	0.0116934		TRBV5	TRBJ1-1	CASSLQTNSNTEVF	262	0.00323535
TRBV5	TRBJ1-1	CASSQGGTGNTEVF	4734	0.064166		TRBV29	TRBJ1-1	CASSPGGPEVF	5186	0.0678107		TRBV17	TRBJ1-1	CASSRDPQGGNTEVF	491	0.00701179		TRBV20	TRBJ2-5	CGAKNWGNQDTQYF	709	0.0114353		TRBV13-2	TRBJ1-1	CASRQINTEVF	262	0.00323535
TRBV5	TRBJ2-3	CASSHRDWGTSAETLYF	4732	0.0641389		TRBV5	TRBJ1-2	CASSQGTGGSDYTF	5175	0.0676669		TRBV13-2	TRBJ1-1	CASGETGGATEVF	483	0.00689754		TRBV29	TRBJ2-1	CASSCGRESNYAGQF	703	0.0113385		TRBV1	TRBJ2-5	CTGSASRDPGGDTQYF	261	0.00322301
TRBV13-2	TRBJ2-4	CASGDAPSQNTLYF	4725	0.064044		TRBV31	TRBJ1-6	CAWSLHYNSPLYF	5172	0.0676277		TRBV5	TRBJ1-1	CASSPDRANTEVF	481	0.00686898		TRBV1	TRBJ2-5	CSAVTGGRWDTQYF	703	0.0113385		TRBV1	TRBJ2-5	CSASRDPGGDAQYF	260	0.00321066
TRBV5	TRBJ2-5	CASSQDGDTQYF	4709	0.0638271		TRBV5	TRBJ2-7	CASSQDWGGSSEQYF	5165	0.0675362		TRBV20	TRBJ2-4	CGARSSQNTLYF	479	0.00684042		TRBV12-1	TRBJ2-7	CASPLDKSYEQYF	697	0.0112418		TRBV1	TRBJ1-5	CGADQEAPLF	258	0.00318596
TRBV13-3	TRBJ2-4	CASSDAGLGSQNTLYF	4697	0.0636645		TRBV12-1	TRBJ2-1	CASSLGGIAEQF	5161	0.0674839		TRBV13-3	TRBJ1-3	CASSGQGNSGNTLYF	471	0.00672618		TRBV29	TRBJ1-6	CASSDAGDSPLYF	676	0.010903		TRBV5	TRBJ1-1	CASSLKINSNTEVF	257	0.00317361
TRBV29	TRBJ2-1	CASSPSTGGYAEQF	4696	0.0636509		TRBV31	TRBJ2-7	CAWSLQGSNEQYF	5150	0.06734		TRBV1	TRBJ1-1	CTSSAAQGNTEVF	469	0.00669762		TRBV13-1	TRBJ2-4	CASGDAGLGGRQNTLYF	674	0.0108708		TRBV1	TRBJ1-3	CSINSGNTPYF	257	0.00317361
TRBV31	TRBJ2-5	CAWRWDIQDTQYF	4688	0.0635425		TRBV5	TRBJ2-7	CASSQDPGQDYEQYF	5145	0.0672746		TRBV20	TRBJ2-5	CGARAHNQDTQYF	468	0.00668334		TRBV12-1	TRBJ2-7	CASSLGKSYEQYF	671	0.0108224		TRBV13-2	TRBJ2-7	CASSDRSSYEQYF	257	0.00317361
TRBV1	TRBJ1-4	CSADSRPERLF	4685	0.0635018		TRBV1	TRBJ1-4	CSADPISNERLF	5142	0.0672354		TRBV1	TRBJ1-1	CSAAQGNTEAF	467	0.00666905		TRBV15	TRBJ2-1	CASSFRGWGYAEQF	660	0.010645		TRBV1	TRBJ2-5	CSNPTGGPNQGTQYF	255	0.00314891
TRBV16	TRBJ2-7	CASSLDGVGEQYF	4678	0.0634069		TRBV13-3	TRBJ1-2	CASSGGQANSDYTF	5132	0.0671047		TRBV20	TRBJ2-5	CGARDWGVGKDTQYF	462	0.00659765		TRBV13-1	TRBJ1-6	CASSDAGDSLLYF	652	0.010516		TRBV5	TRBJ1-1	CASSSGTNTEVF	254	0.00313656
TRBV13-2	TRBJ2-2	CASGGDRNTGQLYF	4678	0.0634069		TRBV5	TRBJ2-5	CASSQGTGGDTQYF	5082	0.0664509		TRBV1	TRBJ2-4	CTRSADQGRQNTLYF	459	0.00655481		TRBV12-1	TRBJ2-7	CASSLDKGYEQYF	648	0.0104514		TRBV26	TRBJ1-3	CASSLQGAGNTPYF	254	0.00313656
TRBV31	TRBJ1-1	CAWSLGGANTEVF	4670	0.0632985		TRBV16	TRBJ2-5	CASSSDRGDTQYF	5065	0.0662286		TRBV13-2	TRBJ2-5	CASSGLLQDTQYF	452	0.00645484		TRBV13-1	TRBJ2-7	CASGDAGGVQYF	626	0.0100966		TRBV13-3	TRBJ1-1	CASSGASTEVF	254	0.00313656
TRBV26	TRBJ2-5	CASRPGQGGQDTQYF	4652	0.0630545		TRBV13-3	TRBJ2-2	CASSGTENTGQLYF	5064	0.0662155		TRBV13-2	TRBJ2-1	CASSDRTGGNYAEQF	448	0.00639772		TRBV13-1	TRBJ1-6	CANSDAGDSPLYF	619	0.00998371		TRBV1	TRBJ2-5	CSLRGWGTQYF	253	0.00312422
TRBV13-1	TRBJ2-7	CASSDAAGGSYEQYF	4648	0.0630003		TRBV5	TRBJ2-7	CASSQERAGGYEQYF	5063	0.0662024		TRBV20	TRBJ2-1	CGARGTGGYAEQF	447	0.00638344		TRBV17	TRBJ2-5	CASSRSGGYQDTQYF	601	0.00969339		TRBV1	TRBJ2-4	CSRDNSQNTLYF	253	0.00312422
TRBV13-2	TRBJ2-3	CASGGQASAETLYF	4633	0.062797		TRBV5	TRBJ2-3	CASSQGLGVETLYF	5058	0.0661371		TRBV20	TRBJ1-1	CGARKGYTEVF	442	0.00631204		TRBV17	TRBJ1-2	CASSRDEGGNSDYTF	596	0.00961275		TRBV1	TRBJ2-1	CSAGHNNYAERF	253	0.00312422
TRBV13-2	TRBJ2-3	CASGGTSAETLYF	4620	0.0626208		TRBV5	TRBJ1-4	CASSQDWDNNERLF	5046	0.0659801		TRBV5	TRBJ2-1	CASSDQSYAEQF	441	0.00629776		TRBV17	TRBJ2-4	CASSRGSSGTLYF	585	0.00943533		TRBV1	TRBJ1-5	CSATGINQAPPF	253	0.00312422
TRBV1	TRBJ2-5	CSAEAGGARDTQYF	4619	0.0626072		TRBV31	TRBJ2-4	CAWSPGLGGRNTLYF	5032	0.0657971		TRBV1	TRBJ2-4	CSADQGR_NTLYF	431	0.00615495		TRBV12-1	TRBJ2-7	CASSPGKTYEQYF	584	0.0094192		TRBV1	TRBJ1-5	CSADTGVNQAPLF	252	0.00311187
TRBV13-3	TRBJ2-3	CASRGGGAETLYF	4615	0.062553		TRBV13-3	TRBJ1-1	CASSDGDKNTEVF	5027	0.0657317		TRBV20	TRBJ2-1	CGARDWGYAEQF	430	0.00614067		TRBV12-1	TRBJ2-7	CAGSPDKTYEQYF	584	0.0094192		TRBV1	TRBJ2-3	CSVGQGNSVETLYF	251	0.00309952
TRBV17	TRBJ2-1	CASSSPGGNYAEQF	4612	0.0625124		TRBV1	TRBJ1-3	CSASNSGNTLYF	5023	0.0656794		TRBV13-2	TRBJ2-3	CASSLQGAETLYF	429	0.00612639		TRBV13-1	TRBJ1-6	CASSDAGASPLYF	580	0.00935469		TRBV5	TRBJ1-1	CASSLKTNSTTEVF	249	0.00307482
TRBV13-3	TRBJ1-2	CASSGGSNSDYTF	4596	0.0622955		TRBV5	TRBJ2-3	CASSQDWASAETLYF	5019	0.0656271		TRBV1	TRBJ1-6	CTRSADRDSYNSPLYF	421	0.00601215		TRBV12-1	TRBJ2-7	CASSPDKAYEQYF	576	0.00929017		TRBV1	TRBJ1-5	CSADQGAPLF	249	0.00307482
TRBV13-2	TRBJ2-1	CASGGLGGGVAEQF	4576	0.0620244		TRBV5	TRBJ2-3	CASSQECWGAETLYF	5011	0.0655225		TRBV13-3	TRBJ1-3	CASSGGLDTLYF	417	0.00595502		TRBV12-1	TRBJ1-6	CASSLWGNSYNSPLYF	560	0.00903211		TRBV15	TRBJ1-1	CASSLDRVNTEVF	249	0.00307482
TRBV31	TRBJ2-1	CASILRGGYAEQF	4575	0.0620108		TRBV15	TRBJ2-7	CASSFLGPYEQYF	5006	0.0654571		TRBV5	TRBJ2-2	CASSQTGSTGQLYF	415	0.00592646		TRBV13-1	TRBJ1-6	CSDAGDSPLYF	557	0.00898372		TRBV5	TRBJ1-6	CASSPGANSYNSPLYF	248	0.00306247
TRBV5	TRBJ1-4	CASSPGTVSNERLF	4571	0.0619566		TRBV5	TRBJ1-1	CASSQVNTEVF	5002	0.0654048		TRBV1	TRBJ2-2	CSAVRDSNTGRLYF	411	0.00586934		TRBV13-3	TRBJ2-7	CASSDAQ_CVASFTLQNSYEQYF	556	0.0089676		TRBV1	TRBJ2-1	CSAGHNNYAEQLF	248	0.00306247
TRBV13-2	TRBJ2-7	CASGELGDSYEQYF	4568	0.061916		TRBV31	TRBJ1-4	CAWSRDNNERLF	5001	0.0653917		TRBV13-1	TRBJ2-7	CASGMEGGREQYF	409	0.00584078		TRBV16	TRBJ2-7	CASSLGQSEQYF	552	0.00890308		TRBV1	TRBJ1-5	CSATGVNQAPLF	248	0.00306247
TRBV13-2	TRBJ1-4	CASGDAGGSNERLF	4565	0.0618753		TRBV5	TRBJ2-1	CASSQGLVYAEQF	4999	0.0653656		TRBV13-1	TRBJ1-5	CASSLGQRDQAPLF	402	0.00574081		TRBV12-1	TRBJ2-7	CASSLDKSYGQYF	549	0.00885469		TRBV1	TRBJ1-1	CSADGANTDVF	248	0.00306247
TRBV16	TRBJ2-3	CASSPPGTGGAETLYF	4550	0.061672		TRBV13-2	TRBJ1-4	CASGEPREDERLF	4991	0.065261		TRBV1	TRBJ2-5	CSANRADEQYF	401	0.00572653		TRBV12-1	TRBJ2-7	CASSPDKTYGQYF	543	0.00875792		TRBV1	TRBJ2-5	CSASRGPGGDTQYF	247	0.00305012
TRBV15	TRBJ2-7	CASSFRDWGAYEQYF	4531	0.0614145		TRBV5	TRBJ2-1	CASSQGTYAEQF	4985	0.0651825		TRBV13-2	TRBJ2-7	CASSDAPPGGDEQYF	400	0.00571225		TRBV12-1	TRBJ2-7	CASSHDWGGYEQHF	533	0.00859663		TRBV1	TRBJ2-5	CTRSASRDPGGDTQYF	246	0.00303778
TRBV5	TRBJ1-1	CASSQGQGYTEVF	4530	0.0614009		TRBV5	TRBJ2-3	CASSQGGTSETLYF	4972	0.0650125		TRBV1	TRBJ2-2	CGAVRDSNTGQLYF	399	0.00569797		TRBV17	TRBJ2-7	CASSRDRTGNYEQYF	525	0.0084676		TRBV1	TRBJ2-5	CSADQSGGDTQYF	246	0.00303778
TRBV13-3	TRBJ1-1	CASRGGANTEVF	4520	0.0612654		TRBV31	TRBJ1-3	CAWSPGSGNTLYF	4963	0.0648949		TRBV13-1	TRBJ2-4	CASSGAQNQNTLYF	394	0.00562657		TRBV13-1	TRBJ1-6	CASSDAGDSSLYF	524	0.00845148		TRBV13-2	TRBJ2-1	CASGGGRGNYAEQF	246	0.00303778
TRBV31	TRBJ1-4	CAWSPSNERLF	4516	0.0612111		TRBV13-2	TRBJ2-4	CASGEQGSQNTLYF	4959	0.0648426		TRBV1	TRBJ1-2	CSADRNSDYAF	393	0.00561229		TRBV12-1	TRBJ2-7	CASSLDKSYERYF	520	0.00838696		TRBV15	TRBJ1-1	CASSLDRANTEVCF	244	0.00301308
TRBV15	TRBJ1-4	CASSLDFSNERLF	4491	0.0608723		TRBV13-2	TRBJ2-2	CASGPGLGLGQLYF	4933	0.0645026		TRBV1	TRBJ2-7	CSADGPIEQYF	388	0.00554088		TRBV13-1	TRBJ1-6	CASSDAEDSPLYF	519	0.00837083		TRBV13-3	TRBJ2-3	CAGSDARGPSAETLYF	244	0.00301308
TRBV15	TRBJ1-1	CASGSANTEVF	4488	0.0608316		TRBV13-3	TRBJ1-4	CASSDETLSNERLF	4931	0.0644764		TRBV13-2	TRBJ2-7	CASSDRDWGYEQYF	385	0.00549804		TRBV13-3	TRBJ2-5	CASSGLGAQDTQYF	517	0.00833857		TRBV13-2	TRBJ1-4	CASSDGDRNERLF	244	0.00301308
TRBV31	TRBJ2-4	CAWRPGTGGPQNTLYF	4487	0.0608181		TRBV26	TRBJ2-7	CASSLGTNSYEQYF	4913	0.0642411		TRBV13-2	TRBJ2-7	CASSDAGTGAYEQYF	382	0.0054552		TRBV1	TRBJ1-1	CSADGRNTEAF	505	0.00814503		TRBV5	TRBJ2-1	CASSRGLGGRGAEQF	243	0.00300073
TRBV31	TRBJ1-4	CAWSLGTDERLF	4484	0.0607774		TRBV5	TRBJ2-2	CASSRDWGGTNTGQLYF	4906	0.0641495		TRBV13-2	TRBJ1-3	CASGGGGHFSGNTLYF	381	0.00544092		TRBV13-1	TRBJ2-4	CASSGTGVGNTLYF	505	0.00814503		TRBV1	TRBJ1-1	CRVSGGATEVF	243	0.00300073
TRBV31	TRBJ1-2	CASTGANSDYTF	4472	0.0606148		TRBV13-2	TRBJ1-1	CASGDQHANTEVF	4895	0.0640057		TRBV5	TRBJ1-1	CASSQDGGGTEVF	379	0.00541236		TRBV17	TRBJ2-1	CASTRLGGRSEQF	497	0.008016		TRBV13-2	TRBJ2-1	CASSRDYAEQF	243	0.00300073
TRBV13-2	TRBJ2-1	CASGPDWLYAEQF	4469	0.0605741		TRBV5	TRBJ2-5	CASSQWGGRGQDTQYF	4893	0.0639796		TRBV1	TRBJ2-2	CSAVRDSDTGQLYF	379	0.00541236		TRBV13-1	TRBJ1-6	CASSDAGDLPLYF	491	0.00791923		TRBV1	TRBJ2-7	CSFSGTEVLF	242	0.00298838
TRBV13-2	TRBJ2-3	CASATRDRGAETLYF	4457	0.0604114		TRBV13-1	TRBJ1-6	CASSGYNSPLYF	4890	0.0639403		TRBV4	TRBJ1-1	CAAGTGNTEVF	377	0.0053838		TRBV1	TRBJ1-4	CSADANNERIF	489	0.00788697		TRBV1	TRBJ1-3	CSINPGNTLYF	241	0.00297603
TRBV5	TRBJ2-7	CASSQERQYEQYF	4452	0.0603437		TRBV5	TRBJ1-4	CASSQDSGANERLF	4873	0.063718		TRBV5	TRBJ2-7	CASSPRDNYVQYF	376	0.00536952		TRBV17	TRBJ2-7	CASSTQGALEQYF	488	0.00787084		TRBV13-3	TRBJ2-7	CASSGWDNSYEQYF	241	0.00297603
TRBV13-2	TRBJ1-1	CASGLQGGKTNTEVF	4450	0.0603166		TRBV5	TRBJ1-2	CASSQDGNSDYTF	4860	0.0635481		TRBV13-2	TRBJ1-4	CASSDAANERLF	375	0.00535524		TRBV13-2	TRBJ2-7	CASSPDKTYEQYF	478	0.00770955		TRBV13-3	TRBJ2-7	CASSDWDNPYEQYF	239	0.00295133
TRBV13-2	TRBJ2-4	CASGDTVGGRQNTLYF	4446	0.0602623		TRBV31	TRBJ2-7	CAWSSRLGGSSYEQYF	4853	0.0634565		TRBV20	TRBJ2-3	CGARDPRGSAETLYF	374	0.00534096		TRBV12-2	TRBJ1-4	CASSLPRAFSNERLF	474	0.00764504		TRBV13-3	TRBJ2-7	CAGSDWDNSYEQYF	239	0.00295133
TRBV31	TRBJ1-3	CAWSRGQGRSGNTLYF	4435	0.0601132		TRBV16	TRBJ2-4	CASSLDPGSQNTLYF	4846	0.063365		TRBV13-2	TRBJ2-3	CASHRAETLYF	373	0.00532668		TRBV15	TRBJ2-1	CASSPWDWGYAEQLF	470	0.00758052		TRBV5	TRBJ1-1	CASSLKTHSNTEVF	238	0.00293899
TRBV26	TRBJ1-2	CASSLHRGRNSDYTF	4432	0.0600726		TRBV13-3	TRBJ1-4	CASSERVSNERLF	4844	0.0633388		TRBV20	TRBJ1-3	CGARDRDRGRGNTLYF	372	0.00531239		TRBV13-2	TRBJ2-5	CASGASGTKVTQYF	465	0.00749988		TRBV1	TRBJ1-6	CSAGRYNSPLYF	238	0.00293899
TRBV13-2	TRBJ2-4	CASGDAAGGRQNTLYF	4426	0.0599913		TRBV31	TRBJ2-5	CAWSGGQDTQYF	4840	0.0632865		TRBV1	TRBJ1-6	CSAGRDSYNSPLYF	368	0.00525527		TRBV12-1	TRBJ2-7	CASPPDKTYEQYF	464	0.00748375		TRBV26	TRBJ1-2	CASSFRTNSDYTF	237	0.00292664
TRBV13-3	TRBJ2-7	CASSDDGQGYEQYF	4425	0.0599777		TRBV13-3	TRBJ2-1	CASSDFGGYNYAEQF	4837	0.0632473		TRBV1	TRBJ1-6	CTRRRQGASYNSPLYF	366	0.00522671		TRBV3	TRBJ1-4	CASSPDRGANERLF	462	0.00745149		TRBV1	TRBJ2-4	CSAEGLGGSQNTSYF	237	0.00292664
TRBV5	TRBJ1-5	CASSQDQGQGNQAPLF	4401	0.0596524		TRBV16	TRBJ1-1	CASSPSANTEVF	4824	0.0630773		TRBV13-2	TRBJ2-5	CASRDRGGQDTQYF	366	0.00522671		TRBV12-1	TRBJ2-7	CASSPDRTYEQYF	460	0.00741923		TRBV1	TRBJ1-5	CSAAGINQAPLF	237	0.00292664
TRBV13-3	TRBJ1-1	CASSEDRTNTEVF	4401	0.0596524		TRBV13-3	TRBJ2-4	CASSDWGSQNTLYF	4824	0.0630773		TRBV13-2	TRBJ2-3	CASSDDWGGEAETLYF	366	0.00522671		TRBV12-1	TRBJ2-7	CASSLDESYEQYF	454	0.00732246		TRBV1	TRBJ2-3	CRVGQGNSAETLYF	236	0.00291429
TRBV13-2	TRBJ2-4	CASGDKGSQNTLYF	4394	0.0595575		TRBV13-2	TRBJ2-3	CASGDWGGAETLYF	4812	0.0629204		TRBV1	TRBJ2-2	CSAARDSNTGQLYF	364	0.00519815		TRBV1	TRBJ1-4	CTSSADANNERLF	453	0.00730633		TRBV1	TRBJ1-5	CGAGTGVNQAPLF	236	0.00291429
TRBV13-3	TRBJ2-7	CASSATAPYEQYF	4389	0.0594897		TRBV5	TRBJ2-4	CASRGDQNTLYF	4784	0.0625543		TRBV13-2	TRBJ2-7	CASSDTGGEQYF	362	0.00516959		TRBV13-2	TRBJ2-7	CASSLDKSYEQYF	450	0.00725795		TRBV13-3	TRBJ2-7	CASSDWDNSYGQYF	236	0.00291429
TRBV15	TRBJ2-7	CASSLGGGADEQYF	4381	0.0593813		TRBV1	TRBJ2-7	CSADPGSSYEQYF	4776	0.0624497		TRBV20	TRBJ2-4	CGARDGGLGENTLYF	357	0.00509819		TRBV12-1	TRBJ2-7	CASSPDKTCEQYF	447	0.00720956		TRBV13-1	TRBJ2-7	CASGGPGQYEQYF	234	0.00288959
TRBV5	TRBJ2-4	CASSPGGQNTLYF	4369	0.0592187		TRBV5	TRBJ2-5	CASSQALNQDTQYF	4775	0.0624366		TRBV13-1	TRBJ1-1	CASGQGRDTEVF	357	0.00509819		TRBV1	TRBJ1-1	CSADGGNTEVF	446	0.00719343		TRBV1	TRBJ1-5	CSATGTNQAPLF	232	0.00286489
TRBV5	TRBJ2-1	CASSQFWAAEQF	4353	0.0590018		TRBV13-2	TRBJ2-7	CASGGGGGRDEQYF	4763	0.0622797		TRBV13-2	TRBJ1-4	CASGDAPNERLF	355	0.00506962		TRBV13-1	TRBJ1-6	CASSDAGDSPF	443	0.00714504		TRBV1	TRBJ2-7	CSADLGGDEQYF	231	0.00285255
TRBV5	TRBJ1-6	CASSQDTSYNSPLYF	4344	0.0588798		TRBV5	TRBJ1-1	CASSQGLNTEVF	4751	0.0621228		TRBV13-2	TRBJ1-1	CASGETGGSTEVSF	355	0.00506962		TRBV1	TRBJ1-4	CSADAYNERLF	438	0.0070644		TRBV1	TRBJ1-6	CSAGQGNSPLYF	231	0.00285255
TRBV5	TRBJ2-5	CASSQEWVNQDTQYF	4342	0.0588527		TRBV5	TRBJ1-4	CASSQDRGGERLF	4737	0.0619397		TRBV1	TRBJ2-4	CSAGQGRQNTLYF	353	0.00504106		TRBV29	TRBJ2-1	CASTRDRAAEQF	437	0.00704827		TRBV13-1	TRBJ1-3	CASSWDGSGNTLYF	231	0.00285255
TRBV13-2	TRBJ2-4	CASGDARGGSQNTLYF	4335	0.0587578		TRBV5	TRBJ2-5	CASSQEGRDTQYF	4735	0.0619136		TRBV13-2	TRBJ2-5	CASGDGGGQDAQYF	351	0.0050125		TRBV13-2	TRBJ2-7	CASSDEGDEQYF	434	0.00699989		TRBV31	TRBJ2-1	CAWSLTGGVYAGQF	230	0.0028402
TRBV13-2	TRBJ2-4	CASGDASGEQNTLYF	4330	0.05869		TRBV31	TRBJ2-7	CAWGGTGTYEQYF	4726	0.0617959		TRBV1	TRBJ1-1	CSAAQGNTEVLF	350	0.00499822		TRBV1	TRBJ1-4	CSADANNDRLF	430	0.00693537		TRBV26	TRBJ2-3	CSVGQGNSAETLYF	230	0.0028402
TRBV13-2	TRBJ2-2	CASGETTNTGQLYF	4324	0.0586087		TRBV13-2	TRBJ2-2	CASGEGPANTGQLYF	4704	0.0615082		TRBV1	TRBJ1-6	CSAEYSSPLYF	348	0.00496966		TRBV13-2	TRBJ1-4	CTCSADANNERLF	429	0.00691924		TRBV5	TRBJ1-1	CASRLKTNSNTEVF	229	0.00282785
TRBV29	TRBJ1-1	CASSLSHRGNTEVF	4314	0.0584732		TRBV31	TRBJ1-4	CAWSRGINERLF	4687	0.061286		TRBV1	TRBJ1-1	CSAGGTEVF	348	0.00496966		TRBV13-1	TRBJ2-4	CASSDGQNTLYF	427	0.00688698		TRBV1	TRBJ2-7	CSFSGTGSYEQSF	229	0.00282785
TRBV16	TRBJ2-3	CASSLVTGGAETLYF	4310	0.058419		TRBV5	TRBJ2-1	CASSQGQHPYAEQF	4656	0.0608806		TRBV13-2	TRBJ2-1	CASGGGYAEQF	348	0.00496966		TRBV12-1	TRBJ2-7	CASSPDKTYEQCF	427	0.00688698		TRBV13-1	TRBJ2-3	CASGPGLGNAETLYF	229	0.00282785
TRBV13-2	TRBJ1-2	CASGDRTGENSDYTF	4310	0.058419		TRBV13-3	TRBJ2-5	CASSPLQGKDTQYF	4649	0.0607891		TRBV1	TRBJ2-2	CSAVRDSNTGQLHF	347	0.00495538		TRBV20	TRBJ1-4	CGASGTINERLF	422	0.00680634		TRBV13-1	TRBJ2-3	CASGDERVGAETLYF	229	0.00282785
TRBV13-3	TRBJ2-1	CASSLTGENYAEQF	4295	0.0582156		TRBV13-2	TRBJ2-1	CASGDALGVNYAEQF	4642	0.0606976		TRBV13-2	TRBJ1-4	CAGGDASNERLF	346	0.0049411		TRBV1	TRBJ1-4	CRADANNERLF	420	0.00677408		TRBV13-3	TRBJ1-1	CASSLDRANTEVF	228	0.0028155
TRBV5	TRBJ2-7	CASSQEGRGEQYF	4291	0.0581614		TRBV13-3	TRBJ2-2	CASSDPGQNTGQLYF	4641	0.0606845		TRBV1	TRBJ2-4	CSADQGRQDTLYF	344	0.00491254		TRBV12-1	TRBJ2-7	CASSLDKSYEQCF	420	0.00677408		TRBV13-2	TRBJ2-5	CAGGEGTGQDTQYF	228	0.0028155
TRBV13-2	TRBJ2-3	CASGGKPSAETLYF	4290	0.0581479		TRBV31	TRBJ1-2	CAWSLWGSNSDYTF	4639	0.0606583		TRBV13-2	TRBJ2-7	CASRLTEGQYEQYF	343	0.00489826		TRBV15	TRBJ2-1	CAGSPWDWGYAEQF	418	0.00674183		TRBV1	TRBJ2-7	CRADRTGGSEQYF	226	0.0027908
TRBV31	TRBJ2-7	CAWRQKYEQYF	4288	0.0581208		TRBV13-2	TRBJ1-5	CASGDVGQNNQAPLF	4604	0.0602007		TRBV13-1	TRBJ2-1	CASSDQSYAEQF	343	0.00489826		TRBV12-1	TRBJ1-2	CASGEDNANSDYTF	412	0.00664505		TRBV1	TRBJ2-1	CKPGLGDAEQSF	226	0.0027908
TRBV5	TRBJ2-7	CASSPGQGAYEQYF	4280	0.0580123		TRBV16	TRBJ2-2	CASSPGAGVNTGQLYF	4601	0.0601614		TRBV13-2	TRBJ2-4	CASSDAKGGSQNTLYF	342	0.00488398		TRBV13-1	TRBJ1-6	CASSDAGNSPLYF	411	0.00662892		TRBV13-2	TRBJ2-4	CASSPRGRQNTLYF	225	0.00277845
TRBV13-3	TRBJ2-5	CASEGQGDDTQYF	4263	0.0577819		TRBV13-2	TRBJ1-1	CASAGTNTEVF	4592	0.0600438		TRBV13-2	TRBJ1-1	CASSPDRANTEVF	342	0.00488398		TRBV13-2	TRBJ2-5	CASNRGDTQYF	397	0.00640312		TRBV13-2	TRBJ2-1	CAGGGGQGNYAEQF	225	0.00277845
TRBV13-2	TRBJ1-5	CASGDQNNQAPLF	4237	0.0574295		TRBV15	TRBJ1-5	CASSLRGGNQAPLF	4580	0.0598869		TRBV31	TRBJ1-6	CAWSRGVDSPLYF	341	0.00486969		TRBV12-1	TRBJ2-7	CASSPDKTHEQYF	395	0.00637086		TRBV5	TRBJ2-7	CAGSQGGREQYF	223	0.00275376
TRBV29	TRBJ2-2	CASSLRTENTGQLYF	4232	0.0573617		TRBV31	TRBJ1-5	CAWSLRGDNQAQHF	4579	0.0598738		TRBV13-2	TRBJ1-4	CASGDASNEGLF	341	0.00486969		TRBV13-2	TRBJ2-5	CASSEGDQDTQYF	394	0.00635474		TRBV1	TRBJ2-1	CGAGHNNYAEQF	223	0.00275376
TRBV13-2	TRBJ2-3	CASGETASAETLYF	4219	0.0571855		TRBV16	TRBJ1-1	CASSLGVTEVF	4563	0.0596646		TRBV1	TRBJ1-1	CSAA_GNTEVF	340	0.00485541		TRBV1	TRBJ1-4	CSAEANNERLF	393	0.00633861		TRBV1	TRBJ1-5	CSAGQEAPLF	223	0.00275376
TRBV13-3	TRBJ2-7	CASRDWGSSYEQYF	4213	0.0571042		TRBV31	TRBJ2-3	CAWSLGGSAETLYF	4547	0.0594554		TRBV13-2	TRBJ1-1	CASGQGGDTEVF	340	0.00485541		TRBV23	TRBJ2-1	CSSSQWTPYAEQF	392	0.00632248		TRBV5	TRBJ2-5	CASSLDGGQDTQYF	222	0.00274141
TRBV13-2	TRBJ2-7	CASGERQSSYEQYF	4203	0.0569686		TRBV13-2	TRBJ2-4	CASGDADWGKNTLYF	4539	0.0593508		TRBV20	TRBJ1-1	CGARGQGVF	337	0.00481257		TRBV12-1	TRBJ2-7	CASSLDKSYEQHF	392	0.00632248		TRBV5	TRBJ2-1	CASSSGHNNYAEQF	221	0.00272906
TRBV13-3	TRBJ2-7	CASSPQGF	4201	0.0569415		TRBV5	TRBJ2-5	CASSQERDRDTQYF	4536	0.0593115		TRBV20	TRBJ1-1	CGACSGNTEVF	337	0.00481257		TRBV12-1	TRBJ2-7	CASSLDRSYEQYF	388	0.00625796		TRBV1	TRBJ2-4	CSAEGPGGSQNTLYF	220	0.00271671
TRBV13-2	TRBJ2-5	CASGDARGGDTQYF	4198	0.0569009		TRBV13-2	TRBJ2-7	CASGDKAYEQYF	4531	0.0592461		TRBV1	TRBJ1-1	CSAAQGSTEVF	337	0.00481257		TRBV29	TRBJ1-5	CASSAPPLF	387	0.00624183		TRBV1	TRBJ2-5	CSAEGQGTQYF	219	0.00270436
TRBV13-2	TRBJ2-1	CASGANYAEQF	4191	0.056806		TRBV1	TRBJ1-1	CSADRGTEVF	4500	0.0588408		TRBV13-2	TRBJ2-7	CASGGRQGNEQYF	337	0.00481257		TRBV13-3	TRBJ1-3	CASSGTTGNTLYF	383	0.00617732		TRBV13-1	TRBJ2-5	CASGEGTGQDTQYF	219	0.00270436
TRBV5	TRBJ2-5	CASSQAAGNQDTQYF	4187	0.0567518		TRBV13-2	TRBJ1-1	CASGEGTSTEVF	4494	0.0587623		TRBV13-2	TRBJ2-5	CASSLQYQDTQYF	337	0.00481257		TRBV12-1	TRBJ2-7	CASSLDKSCEQYF	382	0.00616119		TRBV12-1	TRBJ2-5	CASSLDSTGGAGQDTQYF	219	0.00270436
TRBV5	TRBJ1-1	CASSQDPGNTEVF	4186	0.0567382		TRBV16	TRBJ1-1	CASSPLTRAYTEVF	4493	0.0587493		TRBV13-2	TRBJ1-1	CASGQGRDTEVLF	337	0.00481257		TRBV12-1	TRBJ2-7	CASSLNKSYEQYF	380	0.00612893		TRBV5	TRBJ1-6	CASSRQDYNSPLYF	218	0.00269201
TRBV31	TRBJ2-7	CAWSSSYEQYF	4178	0.0566298		TRBV1	TRBJ1-5	CSADQYNNQAPLF	4482	0.0586054		TRBV1	TRBJ2-2	CSADRDSNTGQLYF	336	0.00479829		TRBV13-1	TRBJ2-4	CASSGGNTLYF	379	0.0061128		TRBV5	TRBJ1-2	CASSFRTNSDYTF	218	0.00269201
TRBV13-3	TRBJ1-5	CASSDGEARGNQAPLF	4174	0.0565756		TRBV5	TRBJ2-7	CASSQDAPTGGEQYF	4479	0.0585662		TRBV13-2	TRBJ2-5	CASSDQLGGEDTQYF	336	0.00479829		TRBV12-1	TRBJ1-4	CASSLPRAFSNERLF	379	0.0061128		TRBV1	TRBJ2-3	CSVGQGNSTETLYF	218	0.00269201
TRBV31	TRBJ1-2	CAWSLWRNSDYTF	4170	0.0565214		TRBV1	TRBJ1-4	CSATGGSERLF	4475	0.0585139		TRBV13-2	TRBJ2-7	CASSEILGGYEQYF	334	0.00476973		TRBV15	TRBJ2-1	CASRPWDWGYAEQF	370	0.00596764		TRBV1	TRBJ1-1	CQGAENTEVF	218	0.00269201
TRBV5	TRBJ1-1	CASSQDPQGAHGTEVF	4161	0.0563994		TRBV31	TRBJ1-2	CAWSSRDRSYSDYTF	4456	0.0582655		TRBV5	TRBJ1-6	CASSPTGKGDNSPLYF	327	0.00466977		TRBV1	TRBJ1-3	CSAVGQGAGDTLYF	364	0.00587087		TRBV13-2	TRBJ1-4	CASSRDRSNERLF	218	0.00269201
TRBV31	TRBJ1-4	CAWSRDREDERLF	4157	0.0563452		TRBV5	TRBJ2-5	CASSPTTGNQDTQYF	4455	0.0582524		TRBV1	TRBJ2-7	CGADRGGGYEQYF	327	0.00466977		TRBV13-1	TRBJ1-6	CASNDAGDSPLYF	362	0.00583861		TRBV13-1	TRBJ2-7	CASSDWDNSYEQYF	218	0.00269201
TRBV5	TRBJ1-4	CASSQEGVSNERLF	4148	0.0562232		TRBV13-1	TRBJ1-1	CASSGGTGTEVF	4450	0.058187		TRBV1	TRBJ1-4	CTRSAGDERLF	326	0.00465549		TRBV13-2	TRBJ1-6	CASGDAGDSPLYF	360	0.00580636		TRBV5	TRBJ2-1	CAGSQGLGGRGAEQF	217	0.00267966
TRBV29	TRBJ2-1	CASGDREYAEQF	4142	0.0561418		TRBV5	TRBJ2-7	CASSQGLGYEQYF	4448	0.0581609		TRBV13-2	TRBJ1-2	CASSDLTNSDYTF	322	0.00459836		TRBV12-1	TRBJ2-7	CASGDAGGVQYF	359	0.00579023		TRBV13-3	TRBJ2-3	CASSGARGPSAETLYF	217	0.00267966
TRBV31	TRBJ2-5	CAWRPQGNQDTQYF	4128	0.0559521		TRBV5	TRBJ2-1	CASSQGNYAEQF	4402	0.0575594		TRBV20	TRBJ1-3	CGAREGGSGNTLYF	321	0.00458408		TRBV1	TRBJ1-1	CSADGRSTEVF	358	0.0057741		TRBV4	TRBJ2-3	CASSPGLGSSAETLYF	216	0.00266732
TRBV13-2	TRBJ2-5	CASRGTYQDTQYF	4128	0.0559521		TRBV13-2	TRBJ2-2	CASGGTSNTGQLYF	4393	0.0574417		TRBV1	TRBJ1-3	CSAGDRIYGNTLYF	320	0.0045698		TRBV13-1	TRBJ1-6	CASSVAGDSPLYF	358	0.0057741		TRBV5	TRBJ1-6	CASSLKTNSYNSPLYF	214	0.00264262
TRBV5	TRBJ2-7	CASSQDWGGYEQYF	4123	0.0558843		TRBV1	TRBJ2-5	CSADGTAQDTQYF	4367	0.0571017		TRBV1	TRBJ2-2	CSAVRDSNTEQLYF	319	0.00455552		TRBV1	TRBJ2-3	CSADRAGGAETPYF	356	0.00574184		TRBV1	TRBJ2-3	CSVGQRNSAETLYF	214	0.00264262
TRBV12-1	TRBJ2-1	CASSLVGTVYAEQF	4123	0.0558843		TRBV13-2	TRBJ2-5	CASGDRQGGDTQYF	4356	0.0569579		TRBV13-2	TRBJ1-5	CASSDAGDNQAPLF	318	0.00454124		TRBV1	TRBJ1-1	CTYSAPGTDGTEVF	351	0.0056612		TRBV15	TRBJ1-1	CASNLDRANTEVF	214	0.00264262
TRBV5	TRBJ1-3	CASSQDQGYSGNTLYF	4119	0.0558301		TRBV13-2	TRBJ2-5	CASGVSTGVSDTQYF	4355	0.0569448		TRBV1	TRBJ1-3	CSAGDGFYGNTLYF	317	0.00452696		TRBV13-1	TRBJ1-1	CASSGQNTEVF	349	0.00562894		TRBV1	TRBJ1-1	CSAAQSTEVF	213	0.00263027
TRBV31	TRBJ1-3	CAWSLGGAGNTLYF	4117	0.055803		TRBV31	TRBJ2-3	CAWSLGDSAETLYF	4344	0.056801		TRBV13-2	TRBJ1-1	CASGETGGSAEVF	316	0.00451268		TRBV13-2	TRBJ2-3	CASDDSRAETLYF	348	0.00561281		TRBV5	TRBJ2-7	CASSGQGHSYEQYF	212	0.00261792
TRBV12-1	TRBJ1-3	CASSLSSGNTLYF	4111	0.0557217		TRBV13-3	TRBJ1-1	CASTQATEVF	4340	0.0567487		TRBV1	TRBJ1-1	CSAARGNTEVF	315	0.0044984		TRBV20	TRBJ2-5	CGAGGGGQDTQYF	344	0.0055483		TRBV1	TRBJ2-3	CSADGDRAPAETPYF	212	0.00261792
TRBV13-2	TRBJ2-1	CASGDAGGNYAEQF	4107	0.0556674		TRBV31	TRBJ2-3	CAWSLGTGGSAETLYF	4334	0.0566702		TRBV1	TRBJ2-4	CSADQGRRNTLYF	313	0.00446984		TRBV12-1	TRBJ2-7	CASSPDKTYERYF	344	0.0055483		TRBV13-3	TRBJ2-7	CASSQGGREQYF	210	0.00259322
TRBV13-2	TRBJ2-1	CASGDAWGDYAEQF	4101	0.0555861		TRBV29	TRBJ2-4	CASRLGGKNTLYF	4322	0.0565133		TRBV13-2	TRBJ1-2	CASSDMGQGNSDYTF	313	0.00446984		TRBV13-2	TRBJ2-1	CASEQGSYAEQF	343	0.00553217		TRBV13-3	TRBJ2-7	CASSPTGGSYEQYF	209	0.00258087
TRBV5	TRBJ2-4	CASSHLGGFQNTLYF	4095	0.0555048		TRBV13-1	TRBJ1-1	CASSDGGTEVF	4321	0.0565002		TRBV1	TRBJ1-1	CTRSAAQGNTEVF	312	0.00445556		TRBV1	TRBJ1-1	CSADGRNTGVF	338	0.00545152		TRBV13-2	TRBJ1-1	CASSSGTNTEVF	209	0.00258087
TRBV31	TRBJ2-1	CAWSLGGLNYAEQF	4092	0.0554641		TRBV1	TRBJ1-1	CSADEAGANTEVF	4313	0.0563956		TRBV1	TRBJ2-4	CGADQGRQNTLYF	310	0.004427		TRBV12-1	TRBJ2-7	CTSSLDKSYEQYF	335	0.00540314		TRBV3	TRBJ2-2	CASSLDWGNTGQLYF	208	0.00256853
TRBV13-3	TRBJ2-7	CASSAWGVSYEQYF	4085	0.0553692		TRBV13-2	TRBJ1-1	CASGEGTDTEVF	4313	0.0563956		TRBV13-2	TRBJ1-4	CASRDNERLF	310	0.004427		TRBV1	TRBJ1-4	CSADANNEKLF	331	0.00533862		TRBV1	TRBJ2-7	CSADQSGGGTQYF	207	0.00255618
TRBV5	TRBJ2-7	CASSPGPGTGYEQYF	4079	0.0552879		TRBV31	TRBJ1-1	CAWSRQNTEVF	4301	0.0562387		TRBV1	TRBJ1-6	CSADRGSYNSPLYF	309	0.00441271		TRBV15	TRBJ2-1	CASSPWGWGYAEQF	330	0.00532249		TRBV15	TRBJ2-7	CAGSSLGDYEQYF	207	0.00255618
TRBV31	TRBJ1-4	CAWSLDNERLF	4073	0.0552066		TRBV31	TRBJ2-7	CAWTGGPSSYEQYF	4295	0.0561603		TRBV31	TRBJ1-4	CAWSWGISNGRLF	308	0.00439843		TRBV12-1	TRBJ1-2	CASSPGGNSDCTF	324	0.00522572		TRBV5	TRBJ1-1	CASSLKTNSHTEVF	206	0.00254383
TRBV13-2	TRBJ2-7	CASGDAGQAYEQYF	4072	0.055193		TRBV13-2	TRBJ1-5	CASGDAGGDNQAPLF	4294	0.0561472		TRBV30	TRBJ2-7	CSSRDRDSYEQHF	308	0.00439843		TRBV20	TRBJ1-2	CGAGTGGSDYTF	322	0.00519346		TRBV13-2	TRBJ2-1	CASGGGQGSYAEQF	206	0.00254383
TRBV5	TRBJ2-3	CASSQDLDWGGAGAETLYF	4056	0.0549762		TRBV29	TRBJ1-4	CASSLSVGFSNERLF	4277	0.0559249		TRBV13-1	TRBJ2-7	CASGDAQYEQYF	305	0.00435559		TRBV1	TRBJ1-1	CTRSADGRNTEVF	321	0.00517734		TRBV5	TRBJ2-7	CASSDRSSYEQYF	205	0.00253148
TRBV13-3	TRBJ2-1	CASSGTGQAEQF	4050	0.0548948		TRBV5	TRBJ2-7	CASSQEGLGGEQYF	4261	0.0557157		TRBV13-2	TRBJ1-1	CASGQGRDTGVF	304	0.00434131		TRBV13-1	TRBJ1-6	CARSDAGDSPLYF	306	0.0049354		TRBV5	TRBJ1-1	CASSQTGGVGTEVF	205	0.00253148
TRBV13-2	TRBJ1-4	CASGDVGRGNERLF	4048	0.0548677		TRBV29	TRBJ2-3	CASSFPSSAETLYF	4251	0.0555849		TRBV13-2	TRBJ2-7	CAGGERQGNEQYF	302	0.00431275		TRBV13-2	TRBJ1-2	CASSAQGANSDYTF	305	0.00491927		TRBV1	TRBJ2-1	CSAGRNNYAEQF	205	0.00253148
TRBV1	TRBJ1-4	CSADRTGDNERLF	4045	0.0548271		TRBV16	TRBJ2-4	CASSLDRLASQNTLYF	4238	0.055415		TRBV1	TRBJ2-5	CSAGGWQYF	301	0.00429847		TRBV15	TRBJ2-1	CASSPWDRGYAEQF	304	0.00490315		TRBV1	TRBJ1-5	CSADRGGAPLF	205	0.00253148
TRBV16	TRBJ1-4	CASSSGGGVSNERLF	4011	0.0543662		TRBV1	TRBJ1-1	CSEGTNTEVF	4234	0.0553627		TRBV13-2	TRBJ2-7	CASGERQGNGQYF	297	0.00424135		TRBV15	TRBJ2-1	CASSPWDWGYAEQSF	303	0.00488702		TRBV15	TRBJ1-1	CASSSGTNTEVF	205	0.00253148
TRBV13-2	TRBJ2-7	CASGDSAYEQYF	4011	0.0543662		TRBV5	TRBJ1-4	CASSLQVSNERLF	4231	0.0553234		TRBV1	TRBJ1-6	CGADRDSYNSPLYF	296	0.00422707		TRBV13-3	TRBJ1-1	CASSDAQNTEAF	303	0.00488702		TRBV5	TRBJ2-1	CASSLETFYAEQF	204	0.00251913
TRBV13-2	TRBJ2-5	CASGDEGGQDTQYF	4009	0.0543391		TRBV13-2	TRBJ2-7	CASGEPGLGGREQYF	4230	0.0553103		TRBV13-2	TRBJ1-2	CASRTANSDYTF	296	0.00422707		TRBV12-1	TRBJ2-7	CASSPDKTYEQHF	299	0.0048225		TRBV15	TRBJ1-3	CASSFRGGNTLYF	204	0.00251913
TRBV26	TRBJ1-2	CASRQGTGKNSDYTF	3999	0.0542036		TRBV31	TRBJ1-3	CAWRQGNTLYF	4222	0.0552057		TRBV1	TRBJ2-1	CTGSARDWGF	294	0.00419851		TRBV12-1	TRBJ2-7	CASSLDKSHEQYF	294	0.00474186		TRBV15	TRBJ1-1	CSLDRANTEVF	204	0.00251913
TRBV3	TRBJ2-4	CASSHRDREPLYF	3992	0.0541087		TRBV13-2	TRBJ2-1	CASGDAQGVAEQF	4221	0.0551927		TRBV13-1	TRBJ2-7	CAGSDARAEYEQYF	291	0.00415566		TRBV15	TRBJ2-1	CASSPRDWGYAEQF	292	0.0047096		TRBV15	TRBJ1-1	CASSLDKANTEVF	204	0.00251913
TRBV13-1	TRBJ2-7	CASSDAGGSSYEQYF	3981	0.0539596		TRBV5	TRBJ2-7	CASSLAGLGDEQYF	4202	0.0549442		TRBV13-2	TRBJ1-4	CASGDTSNERLF	290	0.00414138		TRBV13-2	TRBJ2-5	CASGDAGGVQYF	292	0.0047096		TRBV5	TRBJ2-5	CASSLTGGDTQYF	203	0.00250678
TRBV13-2	TRBJ1-1	CASGDATGRGTEVF	3979	0.0539325		TRBV13-1	TRBJ1-1	CASSDQNTEVF	4193	0.0548265		TRBV13-1	TRBJ2-7	CASGGEYEQYF	288	0.00411282		TRBV20	TRBJ2-3	CGAWTGGSAETLYF	291	0.00469347		TRBV5	TRBJ2-7	CASSRTGYEQYF	202	0.00249443
TRBV13-2	TRBJ2-4	CASGDAAGGQNTLYF	3974	0.0538647		TRBV13-2	TRBJ2-1	CASGEGTGGVYAEQF	4173	0.054565		TRBV13-2	TRBJ2-4	CASSDAQNQNTLYF	286	0.00408426		TRBV15	TRBJ2-3	CASSLWGTSAETLYF	291	0.00469347		TRBV1	TRBJ2-3	CSADGGRAPAETLYF	201	0.00248208
TRBV13-2	TRBJ1-2	CASAGGSDYTF	3970	0.0538105		TRBV5	TRBJ2-3	CAKEGASAETLYF	4164	0.0544474		TRBV13-2	TRBJ2-1	CASSEGNAEQF	286	0.00408426		TRBV13-1	TRBJ2-1	CASGTGAEQF	288	0.00464509		TRBV13-2	TRBJ2-1	CASSLDRIYAEQF	201	0.00248208
TRBV5	TRBJ2-5	CASSRTEDTQYF	3967	0.0537698		TRBV5	TRBJ2-3	CASSRGTASETLYF	4160	0.054395		TRBV1	TRBJ2-4	CSADQGRQNTLHF	285	0.00406998		TRBV15	TRBJ2-3	CASSFWGSAETLYF	287	0.00462896		TRBV13-2	TRBJ1-1	CASSVTGEEVF	201	0.00248208
TRBV13-3	TRBJ1-4	CASSDDRGPPERLF	3965	0.0537427		TRBV13-1	TRBJ1-4	CASRAHNERLF	4156	0.0543427		TRBV5	TRBJ1-1	CAGSQDGGDTEVF	282	0.00402714		TRBV13-3	TRBJ1-4	CSADANNERLF	283	0.00456444		TRBV5	TRBJ2-7	CASSQGGGEQYF	200	0.00246974
TRBV5	TRBJ2-5	CASSQGHQDTQYF	3959	0.0536614		TRBV1	TRBJ1-5	CSAGTGNQAQHF	4151	0.0542774		TRBV13-1	TRBJ2-1	CASGDGTGGAEQF	281	0.00401286		TRBV13-1	TRBJ1-6	CASSNAGDSPLYF	283	0.00456444		TRBV13-2	TRBJ2-1	CASGGGQGNYAEQLF	200	0.00246974
TRBV5	TRBJ1-1	CASSQDHRANTEVF	3941	0.0534174		TRBV29	TRBJ1-1	CASSYGDANTEVF	4145	0.0541989		TRBV4	TRBJ2-7	CASSLSSYEQYF	280	0.00399858		TRBV13-1	TRBJ1-6	CASSDAGDSPLDF	282	0.00454831		TRBV30	TRBJ2-5	CSSSRNNQGTQYF	199	0.00245739
TRBV5	TRBJ2-4	CASSQGLGKNTLYF	3937	0.0533632		TRBV13-1	TRBJ2-1	CASSGGLAEQYF	4144	0.0541858		TRBV13-2	TRBJ1-5	CASTGTGNQAPLF	279	0.0039843		TRBV13-1	TRBJ1-6	CASRDAGDSPLYF	282	0.00454831		TRBV5	TRBJ1-5	CASSGPTNNNQAPLF	198	0.00244504
TRBV26	TRBJ1-5	CASSRDRNNQAPLF	3932	0.0532954		TRBV5	TRBJ2-1	CASSPQNYAEQF	4137	0.0540943		TRBV1	TRBJ1-6	CSADRDGYNSPLYF	277	0.00395573		TRBV20	TRBJ1-2	CGARAVGNSDYTF	280	0.00451606		TRBV16	TRBJ1-1	CASSLETGNTEAF	198	0.00244504
TRBV31	TRBJ2-7	CAWSGGGALEQYF	3931	0.0532819		TRBV1	TRBJ2-3	CSADWGAETLYF	4116	0.0538197		TRBV13-2	TRBJ2-3	CASSESGETLYF	277	0.00395573		TRBV17	TRBJ2-1	CASSSLGNYAEQF	279	0.00449993		TRBV13-3	TRBJ2-5	CASSDWDQDTQYF	198	0.00244504
TRBV5	TRBJ2-7	CASSPGTGGYEQYF	3915	0.053065		TRBV5	TRBJ2-1	CASSHLYWGNYAEQF	4113	0.0537805		TRBV1	TRBJ2-4	CTRSADLGRQNTLYF	273	0.00389861		TRBV1	TRBJ1-4	CSADANNER_F	277	0.00446767		TRBV31	TRBJ2-1	CAWSLAGGVYAEQF	197	0.00243269
TRBV13-2	TRBJ2-1	CASGDGGRGYAEQF	3914	0.0530515		TRBV13-2	TRBJ1-5	CASWGRGVNNQAPLF	4113	0.0537805		TRBV13-2	TRBJ1-1	CASSGGAHVF	273	0.00389861		TRBV15	TRBJ2-1	CASSFWDWGYAEQF	270	0.00435477		TRBV1	TRBJ2-7	CSATGGAYEQCF	197	0.00243269
TRBV13-2	TRBJ2-1	CASGTGDNYAEQF	3893	0.0527668		TRBV13-1	TRBJ1-2	CASSDEEGRSDYTF	4112	0.0537674		TRBV31	TRBJ1-1	CAWSLWGAF	272	0.00388433		TRBV12-1	TRBJ2-7	CASGEGTGGYEQYF	270	0.00435477		TRBV15	TRBJ1-6	CASRQAYNSPLYF	197	0.00243269
TRBV13-2	TRBJ2-4	CASGGTGVSQNTLYF	3890	0.0527262		TRBV5	TRBJ1-6	CASSHLFNNSYNSPLYF	4107	0.053702		TRBV1	TRBJ2-5	CTRSATKDTQYF	271	0.00387005		TRBV1	TRBJ1-4	CSADANTERLF	269	0.00433864		TRBV13-3	TRBJ2-3	CASSDAWGPSAETLYF	197	0.00243269
TRBV13-2	TRBJ2-2	CASGDWGTGQLYF	3888	0.0526991		TRBV5	TRBJ2-5	CASSQEDRGRNTQYF	4104	0.0536628		TRBV1	TRBJ1-1	CSAAQGNAEVF	271	0.00387005		TRBV29	TRBJ2-1	CASSCGRESN_AEQF	268	0.00432251		TRBV1	TRBJ2-1	CSARGSNYAEQF	196	0.00242034
TRBV5	TRBJ1-4	CASSQDTRQGDERLF	3873	0.0524957		TRBV5	TRBJ1-1	CASSPTGGTEVF	4083	0.0533882		TRBV1	TRBJ2-4	CTRSAEGEKSQNTLYF	270	0.00385577		TRBV26	TRBJ1-6	CASSDAGDSPLYF	268	0.00432251		TRBV13-1	TRBJ1-1	CASGVPGQGPNTEVF	196	0.00242034
TRBV31	TRBJ1-3	CAWRRVTLYF	3872	0.0524822		TRBV13-1	TRBJ2-5	CASSVGQGEDTQYF	4083	0.0533882		TRBV13-2	TRBJ2-7	CASGERQGDEQYF	268	0.00382721		TRBV1	TRBJ2-4	CSADRLGVSQNTLCF	267	0.00430638		TRBV1	TRBJ2-3	CTRSADGDRAPAETLYF	195	0.00240799
TRBV5	TRBJ2-7	CASSHDRGRSSYEQYF	3869	0.0524415		TRBV13-1	TRBJ1-6	CASSDGGAGNSPLYF	4080	0.053349		TRBV13-2	TRBJ2-4	CASSDENTLYF	268	0.00382721		TRBV1	TRBJ1-4	CSADANHERLF	267	0.00430638		TRBV1	TRBJ1-4	CMAPSNERLF	195	0.00240799
TRBV15	TRBJ1-1	CASRINTEVF	3865	0.0523873		TRBV13-2	TRBJ2-4	CASGDDWGGQNTLYF	4079	0.0533359		TRBV13-2	TRBJ1-4	CASGDASSERLF	266	0.00379865		TRBV15	TRBJ2-1	CASSPWDWGCAEQF	263	0.00424187		TRBV31	TRBJ2-1	CASSQGLGGRGAEQF	194	0.00239564
TRBV13-2	TRBJ1-2	CASGHREGSDYTF	3856	0.0522653		TRBV13-2	TRBJ1-1	CASGDRPSNTEVF	4076	0.0532967		TRBV1	TRBJ2-4	CSADQGRQNTLCF	264	0.00377009		TRBV12-1	TRBJ2-7	CASFLDKSYEQYF	262	0.00422574		TRBV1	TRBJ2-5	CSADQSGGGAQYF	194	0.00239564
TRBV31	TRBJ2-5	CAWSLGVNQDTQYF	3848	0.0521569		TRBV5	TRBJ1-5	CASSQVGTDNQAQHF	4064	0.0531398		TRBV1	TRBJ2-7	CTRSARDWGDEQYF	263	0.00375581		TRBV12-1	TRBJ2-7	CASSAGTEVLF	261	0.00420961		TRBV1	TRBJ2-3	CSVGQENSAETLYF	194	0.00239564
TRBV15	TRBJ2-2	CASSFAGQLYF	3842	0.0520756		TRBV1	TRBJ1-3	CSAAGTGGNTLYF	4063	0.0531267		TRBV1	TRBJ2-2	CSAVRDSNTGQLCF	263	0.00375581		TRBV15	TRBJ2-1	CASSLWDWGYAEQF	258	0.00416122		TRBV26	TRBJ1-2	CASGDRADYTF	192	0.00237095
TRBV13-1	TRBJ2-7	CATTGGSYEQYF	3842	0.0520756		TRBV16	TRBJ2-4	CASSPSQNTLYF	4060	0.0530875		TRBV13-2	TRBJ2-7	CASSDEGYEQYF	263	0.00375581		TRBV13-2	TRBJ2-5	CASGDAGGVN_DTQYF	258	0.00416122		TRBV5	TRBJ2-1	CASSQGLGGRGAEQLF	191	0.0023586
TRBV3	TRBJ2-4	CASSDWGGKNTLYF	3838	0.0520213		TRBV13-1	TRBJ2-5	CASSDELGGLGTQYF	4043	0.0528652		TRBV1	TRBJ2-2	CSAVRDNNTGQLYF	258	0.0036844		TRBV12-1	TRBJ2-7	CASGGPGLSSYEQYF	258	0.00416122		TRBV1	TRBJ2-4	CTRSAEGLGGSQNTLYF	191	0.0023586
TRBV13-2	TRBJ2-1	CASGDFKGLGYAEQF	3835	0.0519807		TRBV16	TRBJ1-2	CASSLDFGAGSDYTF	4037	0.0527867		TRBV13-2	TRBJ1-1	CASSETGGSTEVF	258	0.0036844		TRBV12-1	TRBJ2-7	CASSDEGDEQYF	257	0.00414509		TRBV15	TRBJ1-1	CASRQINTEVF	189	0.0023339
TRBV13-2	TRBJ2-5	CASGEGTGGNQDTQYF	3830	0.0519129		TRBV31	TRBJ2-7	CAWSLTGGF	4012	0.0524598		TRBV5	TRBJ1-5	CVSSQVSQNNQAPLF	257	0.00367012		TRBV15	TRBJ1-4	CASSLGHFSNERLF	254	0.00409671		TRBV13-3	TRBJ2-7	CAGSGQGHSYEQYF	189	0.0023339
TRBV13-2	TRBJ1-2	CASGDGTGGSNSDYTF	3822	0.0518045		TRBV29	TRBJ1-1	CASSLRTGGNTEVF	4012	0.0524598		TRBV24	TRBJ2-2	CASSLPLGGLGTGQLYF	257	0.00367012		TRBV1	TRBJ1-4	CSADAINERLF	253	0.00408058		TRBV5	TRBJ1-1	CASSLKTNLNTEVF	188	0.00232155
TRBV16	TRBJ2-1	CASSSTGGGSEQF	3821	0.0517909		TRBV1	TRBJ2-4	CSARTGSQNTLYF	4009	0.0524206		TRBV5	TRBJ2-2	CASSQTGNTGQLYF	256	0.00365584		TRBV1	TRBJ1-1	CSADGRNAEVF	253	0.00408058		TRBV15	TRBJ1-1	CASSLDRANTKVF	188	0.00232155
TRBV13-2	TRBJ2-1	CASGRQGDAEQF	3818	0.0517503		TRBV21	TRBJ2-1	CASSQQGDAEQF	4007	0.0523945		TRBV1	TRBJ2-5	CSAGDQDTQYF	252	0.00359872		TRBV15	TRBJ2-1	CASSPWDWGYAE_F	251	0.00404832		TRBV5	TRBJ2-5	CASSLEGRGQDTQYF	187	0.0023092
TRBV13-2	TRBJ1-4	CASGERKISNERLF	3799	0.0514927		TRBV13-1	TRBJ1-2	CASSDRNSDYTF	4007	0.0523945		TRBV5	TRBJ2-7	CASSQDPGETRSSYEQYF	251	0.00358444		TRBV12-2	TRBJ1-6	CASSQGNSYNSPLYF	251	0.00404832		TRBV5	TRBJ2-1	CASSQGLGGRGAERF	187	0.0023092
TRBV13-2	TRBJ2-4	CASGDALEASQNTLYF	3795	0.0514385		TRBV1	TRBJ2-5	CSENRDEQYF	4005	0.0523683		TRBV13-2	TRBJ2-4	CASSETGGDTLYF	251	0.00358444		TRBV20	TRBJ1-3	CGARNSGNTLYF	249	0.00401606		TRBV26	TRBJ1-2	CASSLRDRGSDYTF	187	0.0023092
TRBV13-2	TRBJ1-2	CASGVGTGANSDYTF	3792	0.0513978		TRBV13-1	TRBJ1-1	CASSDALGTEVF	4005	0.0523683		TRBV13-2	TRBJ2-7	CASGERQGNERYF	249	0.00355588		TRBV12-1	TRBJ2-7	CANSPDKTYEQYF	249	0.00401606		TRBV1	TRBJ2-1	CSAGHNNYAGQF	187	0.0023092
TRBV13-1	TRBJ2-1	CASSDRDNYAEQF	3785	0.051303		TRBV3	TRBJ2-1	CASSLRGNYAEQF	3997	0.0522637		TRBV13-2	TRBJ1-5	CASSLGQRDQAPLF	249	0.00355588		TRBV12-1	TRBJ2-7	CTSSPDKTYEQYF	247	0.00398381		TRBV13-3	TRBJ1-1	CASSGTSTEAF	187	0.0023092
TRBV13-2	TRBJ1-1	CASGVGGDTEVF	3784	0.0512894		TRBV1	TRBJ2-7	CSAESNSYEQYF	3994	0.0522245		TRBV13-1	TRBJ2-7	CAGSDARTEYEQYF	249	0.00355588		TRBV1	TRBJ1-4	CSADAHNERLF	242	0.00390316		TRBV26	TRBJ2-4	CASSPGTKNTLYF	186	0.00229685
TRBV31	TRBJ1-2	CAWSQTDANSDYTF	3776	0.051181		TRBV13-2	TRBJ1-1	CASGDNRQVF	3989	0.0521591		TRBV1	TRBJ2-5	CSATKGTQYF	248	0.0035416		TRBV15	TRBJ2-1	CASGPWDWGYAEQF	241	0.00388703		TRBV1	TRBJ2-3	CSADGDGAPAETLYF	186	0.00229685
TRBV13-3	TRBJ1-1	CASTRDRNTEVF	3773	0.0511403		TRBV5	TRBJ2-7	CASSQDGQGWEQYF	3988	0.052146		TRBV1	TRBJ2-5	CSAKGQGDEQYF	248	0.0035416		TRBV12-2	TRBJ2-3	CASSLDGRGAETLYF	241	0.00388703		TRBV1	TRBJ2-1	CTRSARDSNYAEQF	186	0.00229685
TRBV5	TRBJ2-5	CASSRDRGQDTQYF	3771	0.0511132		TRBV1	TRBJ2-3	CSARQGRGAETLYF	3979	0.0520283		TRBV1	TRBJ2-4	CSVDQGRQNTLYF	243	0.00347019		TRBV12-1	TRBJ2-7	CANSLDKSYEQYF	241	0.00388703		TRBV12-1	TRBJ2-7	CASPLLGQGGEQYF	186	0.00229685
TRBV13-3	TRBJ1-5	CASRDDNQAPLF	3769	0.0510861		TRBV5	TRBJ2-1	CASSPGTGDYAEQF	3976	0.0519891		TRBV13-2	TRBJ2-2	CTCSAVRDSNTGQLYF	242	0.00345591		TRBV12-1	TRBJ1-6	CASSQGNSYNSPLYF	240	0.0038709		TRBV30	TRBJ2-5	CSSSRSNQDTQYF	185	0.00228451
TRBV13-3	TRBJ2-4	CASSDSRIQNTLYF	3734	0.0506117		TRBV5	TRBJ2-5	CASSQDRQGRDTQYF	3975	0.051976		TRBV1	TRBJ1-1	CGAAQGNTEVF	241	0.00344163		TRBV13-2	TRBJ1-4	CSADANNERLF	239	0.00385478		TRBV1	TRBJ2-5	CSASRDPRGDTQYF	185	0.00228451
TRBV13-1	TRBJ2-7	CASSDTGFYEQYF	3721	0.0504355		TRBV31	TRBJ1-3	CAWPPGQGGLSGNTLYF	3967	0.0518714		TRBV1	TRBJ1-1	CSAAQGNTGVF	236	0.00337023		TRBV31	TRBJ2-7	CASGGGYEQYF	238	0.00383865		TRBV26	TRBJ2-1	CASSLDRIYAGQF	184	0.00227216
TRBV13-2	TRBJ2-1	CASGGQGDYAEQF	3720	0.0504219		TRBV29	TRBJ2-1	CASSSRTDYAEQF	3965	0.0518453		TRBV13-2	TRBJ1-1	CASGETGGSTGVF	236	0.00337023		TRBV31	TRBJ2-5	CALPSGTGGDRDTQYF	238	0.00383865		TRBV1	TRBJ2-7	CSADLGGSEQYF	184	0.00227216
TRBV13-3	TRBJ1-1	CASSTGGDTEVF	3709	0.0502728		TRBV26	TRBJ1-1	CASSLTRGHTEVF	3963	0.0518191		TRBV1	TRBJ1-1	CSPGQSNTEAF	235	0.00335595		TRBV1	TRBJ2-3	CTRSADRAGGAETLYF	237	0.00382252		TRBV1	TRBJ2-5	CSAEGRDTQYF	184	0.00227216
TRBV13-2	TRBJ2-3	CASGDAGGASAETLYF	3702	0.050178		TRBV5	TRBJ2-7	CASSQAQGYEQYF	3958	0.0517537		TRBV13-2	TRBJ2-2	CASSDRGRRTGQLYF	234	0.00334167		TRBV1	TRBJ1-4	CSADANNERF	237	0.00382252		TRBV1	TRBJ2-5	CSADQPGGGTQYF	184	0.00227216
TRBV31	TRBJ1-2	CAWSPTSNSDYTF	3693	0.050056		TRBV5	TRBJ2-7	CASSQELGYEQYF	3948	0.051623		TRBV13-1	TRBJ2-5	CASGDGGGQDTQYF	234	0.00334167		TRBV1	TRBJ1-1	CSADGRNTEVLF	237	0.00382252		TRBV1	TRBJ2-4	CSAEGLGGSQSTLYF	184	0.00227216
TRBV13-2	TRBJ2-1	CASGDALGSYAEQF	3689	0.0500017		TRBV5	TRBJ1-6	CASSQDQGYNSPLYF	3939	0.0515053		TRBV13-1	TRBJ2-3	CASGDQLGGSAETLYF	233	0.00332739		TRBV31	TRBJ1-2	CAWRDRRRDSDYTF	236	0.00380639		TRBV1	TRBJ1-6	CSAGQYNPPLYF	184	0.00227216
TRBV13-2	TRBJ2-5	CASGDALNQDTQYF	3688	0.0499882		TRBV13-3	TRBJ2-4	CATLGAGQNTLYF	3935	0.051453		TRBV1	TRBJ1-6	CSADRDSHNSPLYF	232	0.00331311		TRBV15	TRBJ2-1	CASSPWDWGYAGQF	236	0.00380639		TRBV13-2	TRBJ1-2	CASSQGQTNSDYTF	184	0.00227216
TRBV13-1	TRBJ1-2	CASSGGTVNSDYTF	3684	0.049934		TRBV1	TRBJ2-4	CSAGLGEQNTLHF	3915	0.0511915		TRBV1	TRBJ2-5	CSAAKDTQYF	231	0.00329883		TRBV1	TRBJ2-3	CSADRAGGAEALYF	235	0.00379026		TRBV5	TRBJ2-4	CASSPRGRQNTLYF	183	0.00225981
TRBV13-3	TRBJ1-1	CASSGQGGYTEVF	3674	0.0497984		TRBV13-2	TRBJ2-7	CASGEGQGKYEQYF	3899	0.0509823		TRBV30	TRBJ2-1	CSSYRGGAERF	230	0.00328454		TRBV29	TRBJ2-5	CASNRGDAQYF	232	0.00374187		TRBV5	TRBJ2-1	CASGQGLGGRGAEQF	183	0.00225981
TRBV13-2	TRBJ2-7	CASGPGLGGYEQYF	3669	0.0497307		TRBV13-3	TRBJ2-3	CASSDDAETLYF	3898	0.0509692		TRBV1	TRBJ2-4	CSADLGRQNTSYF	228	0.00325598		TRBV12-1	TRBJ2-7	CVSSLDKSYEQYF	232	0.00374187		TRBV1	TRBJ2-2	CSAGQNTGQLYF	183	0.00225981
TRBV13-2	TRBJ1-2	CASGARDREGYTF	3659	0.0495951		TRBV5	TRBJ2-7	CASSPSATGISYEQYF	3893	0.0509038		TRBV1	TRBJ1-6	CSADRDSCNSPLYF	228	0.00325598		TRBV1	TRBJ1-1	CSAGGRNTEVF	231	0.00372575		TRBV1	TRBJ1-3	CSAAGVGGNTLYF	183	0.00225981
TRBV13-1	TRBJ2-4	CASSGTGENTLYF	3650	0.0494731		TRBV1	TRBJ1-1	CSAGEGNTEVF	3893	0.0509038		TRBV13-1	TRBJ2-7	CTSSDTGGEQYF	228	0.00325598		TRBV13-2	TRBJ2-3	CASSATSAETLYF	231	0.00372575		TRBV13-1	TRBJ1-1	CASSGVGEVF	183	0.00225981
TRBV31	TRBJ2-7	CAWSLEGEEQYF	3648	0.049446		TRBV5	TRBJ2-3	CASSPEGGARAETLYF	3887	0.0508254		TRBV1	TRBJ2-5	CSAGSQDTQYF	227	0.0032417		TRBV12-1	TRBJ2-7	CASGDEQYF	231	0.00372575		TRBV5	TRBJ1-1	CASSLTTNSNTEVF	182	0.00224746
TRBV12-1	TRBJ1-4	CASSLSGVSNERLF	3648	0.049446		TRBV13-2	TRBJ2-5	CASGDRGGAGDTQYF	3883	0.0507731		TRBV1	TRBJ1-1	CSAAGGDTGVF	227	0.0032417		TRBV15	TRBJ2-1	CASSLVGTGDAEQF	229	0.00369349		TRBV1	TRBJ2-3	CTRSAARGGYF	182	0.00224746
TRBV13-2	TRBJ2-4	CASGDATPSQNTLYF	3640	0.0493376		TRBV5	TRBJ1-1	CASSSWGGGNTEVF	3866	0.0505508		TRBV13-1	TRBJ1-4	CASSEDRTNERLF	226	0.00322742		TRBV1	TRBJ1-1	CSADGRDTEVF	227	0.00366123		TRBV1	TRBJ1-3	CSINSGDTLYF	182	0.00224746
TRBV13-2	TRBJ2-3	CASGEPLGGRAETLYF	3638	0.0493105		TRBV29	TRBJ2-2	CASSSGQGDTGQLYF	3859	0.0504593		TRBV1	TRBJ1-6	CSADPTDNSPPYF	225	0.00321314		TRBV12-1	TRBJ1-1	CASSLGQEVF	227	0.00366123		TRBV13-2	TRBJ1-2	CASGDRADHTF	182	0.00224746
TRBV31	TRBJ2-7	CAWSFGQYEQYF	3637	0.0492969		TRBV13-1	TRBJ1-1	CASSDAHANTEVF	3832	0.0501062		TRBV13-1	TRBJ1-4	CASRDNERLF	224	0.00319886		TRBV1	TRBJ2-3	CGADRAGGAETLYF	226	0.0036451		TRBV5	TRBJ1-1	CASSDSENTEVF	181	0.00223511
TRBV13-2	TRBJ2-2	CASGDGTGRGTGQLYF	3636	0.0492834		TRBV13-2	TRBJ1-2	CASGEYRGQGSDYTF	3825	0.0500147		TRBV1	TRBJ2-2	CSVVRDSNTGQLYF	222	0.0031703		TRBV12-1	TRBJ2-7	CASSRLGGEQYF	226	0.0036451		TRBV13-2	TRBJ2-1	CASGGGQGNYAGQF	181	0.00223511
TRBV1	TRBJ1-4	CSADSHFSNERLF	3633	0.0492427		TRBV13-3	TRBJ1-4	CASSDPNERLF	3808	0.0497924		TRBV13-2	TRBJ1-4	CASGDASNERLLF	222	0.0031703		TRBV12-1	TRBJ2-7	CASSPDKTYEQSF	226	0.0036451		TRBV1	TRBJ1-3	CSADRWNSGNTLYF	180	0.00222276
TRBV13-2	TRBJ2-5	CASGADRGDQDTQYF	3628	0.0491749		TRBV13-2	TRBJ1-5	CASGSSQAPLF	3802	0.0497139		TRBV13-2	TRBJ2-7	CASSDARTEYEQYF	219	0.00312746		TRBV13-1	TRBJ2-7	CASSLDKSYEQYF	221	0.00356446		TRBV1	TRBJ1-1	CSARGTGVF	180	0.00222276
TRBV13-2	TRBJ2-7	CASGDSWDRADEQYF	3617	0.0490258		TRBV13-2	TRBJ2-3	CASGGQGVDAETLYF	3794	0.0496093		TRBV12-2	TRBJ1-1	CASSLRNTEVF	219	0.00312746		TRBV15	TRBJ2-4	CASSFGSGGQNTLYF	220	0.00354833		TRBV13-2	TRBJ2-7	CASSLGYEQYF	180	0.00222276
TRBV12-1	TRBJ1-4	CASSLSGVSNGRLF	3613	0.0489716		TRBV15	TRBJ1-3	CASSFGNSGNTLYF	3789	0.049544		TRBV13-2	TRBJ2-5	CASSQGSQDTQYF	218	0.00311318		TRBV31	TRBJ2-3	CAWRNWDSAETPYF	218	0.00351607		TRBV31	TRBJ2-1	CAWGLTGGVYAEQF	179	0.00221041
TRBV13-2	TRBJ1-1	CASGDRGTEVF	3608	0.0489039		TRBV5	TRBJ1-6	CASSPGQYNSPLYF	3787	0.0495178		TRBV13-2	TRBJ1-1	CASSDGRNTEVF	217	0.0030989		TRBV13-2	TRBJ1-2	CASSDALSGQGGSDYTF	218	0.00351607		TRBV26	TRBJ2-1	CASSQGLGGRGAEQF	179	0.00221041
TRBV13-3	TRBJ1-5	CASNPGHNNQAPLF	3601	0.048809		TRBV1	TRBJ2-3	CSAGGGAETLYF	3787	0.0495178		TRBV20	TRBJ2-7	CGAGTGHEQYF	216	0.00308462		TRBV13-3	TRBJ1-2	CASSDTGEDSDYTF	217	0.00349994		TRBV16	TRBJ1-1	CASSLVGTGTEVF	179	0.00221041
TRBV13-1	TRBJ2-7	CASSDGQGGYEQYF	3601	0.048809		TRBV5	TRBJ1-1	CASSQGTGGSEVF	3782	0.0494524		TRBV13-2	TRBJ1-1	CTSGETGGSTEVF	216	0.00308462		TRBV13-1	TRBJ2-5	CASNRGDTQYF	216	0.00348381		TRBV13-2	TRBJ2-5	CASGEGTGQGTQYF	179	0.00221041
TRBV13-1	TRBJ2-4	CASSDAGGSQNTLYF	3601	0.048809		TRBV5	TRBJ1-4	CASSQEQISNERLF	3776	0.049374		TRBV5	TRBJ2-5	CASSQDRDRDDEQYF	215	0.00307034		TRBV13-1	TRBJ1-5	CASSDADQAPLF	215	0.00346769		TRBV13-2	TRBJ1-2	CASSLRANSDYTF	179	0.00221041
TRBV13-2	TRBJ2-5	CASGEGIQDTQYF	3600	0.0487954		TRBV13-1	TRBJ1-1	CASSDVRATEVF	3774	0.0493478		TRBV1	TRBJ1-1	CSPGQSNTEVLF	215	0.00307034		TRBV1	TRBJ1-4	CSADGNNERLF	213	0.00343543		TRBV5	TRBJ2-1	CASSRDYAEQF	178	0.00219807
TRBV13-2	TRBJ2-5	CASGDQDRDNQDTQYF	3600	0.0487954		TRBV5	TRBJ1-1	CASSQVGTEVF	3768	0.0492694		TRBV1	TRBJ1-6	CSADRDSYNSPLHF	214	0.00305605		TRBV13-2	TRBJ2-7	CASSLDWAGSYEQYF	213	0.00343543		TRBV13-2	TRBJ2-5	CASGGGTGQDTQYF	178	0.00219807
TRBV31	TRBJ2-5	CASPTGGGNTQYF	3590	0.0486599		TRBV13-3	TRBJ1-1	CASSVANTEVF	3763	0.049204		TRBV1	TRBJ2-5	CSAGASQDAQYF	213	0.00304177		TRBV12-1	TRBJ2-7	CASSLDKSYEQSF	213	0.00343543		TRBV5	TRBJ2-7	CASSLGLGGYEQYF	177	0.00218572
TRBV13-2	TRBJ2-7	CASGPGQYEQYF	3584	0.0485785		TRBV5	TRBJ1-2	CASSQGQGSSDYTF	3759	0.0491517		TRBV13-2	TRBJ2-1	CASSLGQNNYAEQF	210	0.00299893		TRBV1	TRBJ1-4	CSADTQGLNERLF	212	0.0034193		TRBV16	TRBJ1-1	CASSLKTNSNTEVF	177	0.00218572
TRBV13-2	TRBJ2-4	CASGDGTGGGQNTLYF	3579	0.0485108		TRBV1	TRBJ2-1	CSGRDWGAEQYF	3758	0.0491386		TRBV13-2	TRBJ1-3	CASSGEGARALYF	210	0.00299893		TRBV13-1	TRBJ1-6	CASSENSYNSPLYF	212	0.0034193		TRBV1	TRBJ1-6	CSAGQYNSPPYF	176	0.00217337
TRBV13-3	TRBJ2-4	CASSEGTGQNTLYF	3563	0.0482939		TRBV5	TRBJ1-6	CASSPRDRDNSPLYF	3755	0.0490994		TRBV1	TRBJ2-2	CSADWGDTGQPYF	209	0.00298465		TRBV15	TRBJ2-7	CASSLDWAGSYEQYF	211	0.00340317		TRBV15	TRBJ1-1	CASSLDRANTEVVF	176	0.00217337
TRBV13-2	TRBJ2-5	CASGDELGLQDTQYF	3557	0.0482126		TRBV13-2	TRBJ2-4	CASGDRDRGGSQNTLYF	3755	0.0490994		TRBV5	TRBJ1-4	CASSSDNNERLF	207	0.00295609		TRBV12-1	TRBJ2-7	CVSSPDKTYEQYF	211	0.00340317		TRBV5	TRBJ2-7	CASSPGTGGYEQYF	174	0.00214867
TRBV13-2	TRBJ2-1	CASGGPGTF	3551	0.0481313		TRBV29	TRBJ1-1	CASSLSKVGNTEVF	3744	0.0489555		TRBV1	TRBJ2-5	CSADQGRQNTLYF	207	0.00295609		TRBV1	TRBJ2-5	CSADREDTHYF	210	0.00338704		TRBV4	TRBJ2-1	CASSGGSNYAEQF	174	0.00214867
TRBV13-2	TRBJ2-7	CASGDWGAYEQYF	3547	0.048077		TRBV13-3	TRBJ1-6	CASSRGYSPLYF	3742	0.0489294		TRBV1	TRBJ2-5	CSATKDAQYF	206	0.00294181		TRBV13-2	TRBJ1-2	CASSLGTTNSDYTF	210	0.00338704		TRBV26	TRBJ1-2	CASSPRANSDYTF	174	0.00214867
TRBV13-1	TRBJ2-7	CASSDGTGYEQYF	3521	0.0477246		TRBV13-1	TRBJ1-1	CASSDADRTNTEVF	3740	0.0489032		TRBV5	TRBJ2-5	CASGHTEQDTQYF	205	0.00292753		TRBV13-2	TRBJ1-1	CASSVTGANTEVF	210	0.00338704		TRBV16	TRBJ1-1	CASSLVGTDTEVLF	174	0.00214867
TRBV16	TRBJ1-5	CASSPWDNQAPLF	3520	0.0477111		TRBV13-2	TRBJ1-4	CASGDGTGGNERLF	3738	0.0488771		TRBV1	TRBJ2-1	CSADGLGGYAE_F	205	0.00292753		TRBV13-1	TRBJ1-6	CASSLGTGNHSPLYF	210	0.00338704		TRBV15	TRBJ1-4	CASSLGQTSNERLF	174	0.00214867
TRBV13-2	TRBJ2-5	CASGGTGGGQDTQYF	3517	0.0476704		TRBV29	TRBJ2-3	CASRDTGGAETLYF	3717	0.0486025		TRBV13-1	TRBJ2-2	CASRQADTGQLYF	205	0.00292753		TRBV1	TRBJ1-4	CSADATNERLF	207	0.00333866		TRBV1	TRBJ2-1	CSARDSSYAEQF	173	0.00213632
TRBV13-2	TRBJ1-1	CASGPGGGTEVF	3507	0.0475349		TRBV5	TRBJ1-5	CASSQGNNQAPLF	3716	0.0485894		TRBV1	TRBJ2-4	CSADLGRRNTLYF	204	0.00291325		TRBV13-3	TRBJ1-1	CAGSGTGGAEVF	206	0.00332253		TRBV13-3	TRBJ2-5	CASGEGTGQDTQYF	173	0.00213632
TRBV13-2	TRBJ1-1	CASGETGEEVF	3501	0.0474535		TRBV21	TRBJ2-5	CASSPRTGGPNQDTQYF	3713	0.0485502		TRBV1	TRBJ2-2	CSADWGDAGQLYF	204	0.00291325		TRBV13-1	TRBJ2-5	CASAPRDWGGGDTQYF	206	0.00332253		TRBV1	TRBJ2-7	CSADRLSYEQYF	172	0.00212397
TRBV13-2	TRBJ1-2	CASGARNSDYTF	3499	0.0474264		TRBV13-3	TRBJ1-4	CASSSPNERLF	3708	0.0484848		TRBV13-2	TRBJ2-1	CASSDAARNYAEQF	204	0.00291325		TRBV1	TRBJ1-4	CSAAANNERLF	205	0.0033064		TRBV1	TRBJ2-5	CTRSLRGWDTQYF	172	0.00212397
TRBV13-2	TRBJ2-4	CASGDARGPGQNTLYF	3487	0.0472638		TRBV13-1	TRBJ1-4	CASSGDRSNERLF	3692	0.0482756		TRBV13-2	TRBJ1-4	CVSGDASNERLF	204	0.00291325		TRBV13-1	TRBJ2-5	CASSDEGDEQYF	205	0.0033064		TRBV1	TRBJ1-1	CSADGNTEVF	171	0.00211162
TRBV13-1	TRBJ2-3	CASSGTTSAETLYF	3487	0.0472638		TRBV13-1	TRBJ1-1	CASSGRGHTEVF	3683	0.0481579		TRBV1	TRBJ1-1	CTRSPGQSNTEVF	203	0.00289897		TRBV13-1	TRBJ2-4	CASGERQFSQNTLYF	205	0.0033064		TRBV5	TRBJ1-4	CASSHAGTGDGERLF	170	0.00209928
TRBV13-2	TRBJ2-7	CASGDGTGGYEQYF	3484	0.0472231		TRBV13-2	TRBJ1-4	CASGDAGVSNERLF	3682	0.0481448		TRBV5	TRBJ2-2	CASSQDQQETGQLYF	202	0.00288469		TRBV12-2	TRBJ1-1	CASSLGQEVF	205	0.0033064		TRBV4	TRBJ1-2	CASSFPGGDSDYTF	170	0.00209928
TRBV13-3	TRBJ1-1	CASRATEVF	3483	0.0472096		TRBV13-3	TRBJ1-4	CASRLGRDERLF	3681	0.0481318		TRBV1	TRBJ2-3	CSAEGGGPSAETPYF	202	0.00288469		TRBV13-1	TRBJ2-7	CASSGSGGEQYF	204	0.00329027		TRBV1	TRBJ2-7	CGADTYEQYF	170	0.00209928
TRBV13-3	TRBJ2-7	CASSDLYEQYF	3474	0.0470876		TRBV12-1	TRBJ2-7	CASSLDRASYEQYF	3677	0.0480795		TRBV1	TRBJ1-1	CTRSAGGLTEVF	202	0.00288469		TRBV13-1	TRBJ2-7	CASSPDKTYEQYF	203	0.00327414		TRBV26	TRBJ1-2	CSLEIQSSEAGDSALYLSASSTTTNSDYTF	169	0.00208693
TRBV13-2	TRBJ2-7	CASGLTEQYF	3460	0.0468978		TRBV29	TRBJ1-1	CASSTGVRTEVF	3675	0.0480533		TRBV13-2	TRBJ2-7	CASGERQGSEQYF	202	0.00288469		TRBV1	TRBJ1-4	CTGSADANNERLF	202	0.00325801		TRBV1	TRBJ2-4	CKGQNTLYF	169	0.00208693
TRBV26	TRBJ1-5	CASSPAGGNQAPLF	3454	0.0468165		TRBV1	TRBJ1-6	CSADRRAGGGSSPLYF	3669	0.0479749		TRBV13-2	TRBJ1-3	CASSGGLDTLYF	202	0.00288469		TRBV1	TRBJ1-4	CSADANNERVF	202	0.00325801		TRBV1	TRBJ2-3	CSVG_GNSAETLYF	169	0.00208693
TRBV29	TRBJ2-4	CASSSKDWGSQNTLYF	3451	0.0467758		TRBV5	TRBJ2-5	CASSQDSWGAQDTQYF	3659	0.0478441		TRBV1	TRBJ2-5	CSAGNRDTQYF	200	0.00285613		TRBV16	TRBJ2-4	CASSLAVGQNTLYF	201	0.00324188		TRBV1	TRBJ2-3	CSGGQGNSAETLYF	169	0.00208693
TRBV1	TRBJ1-1	CSADRGANTEVF	3450	0.0467623		TRBV13-1	TRBJ2-1	CASSGDWGLYAEQF	3659	0.0478441		TRBV13-1	TRBJ2-5	CASGDGGVDTQYF	199	0.00284185		TRBV15	TRBJ2-1	CASSPWDWGHAEQF	201	0.00324188		TRBV1	TRBJ2-1	CSARDSNHAEQF	169	0.00208693
TRBV13-2	TRBJ1-2	CASGESEGNSDYTF	3446	0.0467081		TRBV1	TRBJ2-5	CSADLQGQDTQYF	3655	0.0477918		TRBV1	TRBJ2-4	CSADLGRQSTLYF	198	0.00282756		TRBV13-2	TRBJ1-1	CASSDGANTEVF	201	0.00324188		TRBV13-3	TRBJ2-7	CASSDWDSSYEQYF	169	0.00208693
TRBV13-1	TRBJ2-3	CASSDGREGAETLYF	3445	0.0466945		TRBV5	TRBJ2-7	CASSQDIYEQYF	3647	0.0476872		TRBV5	TRBJ1-1	CASSLEGGQDTEVF	196	0.002799		TRBV13-1	TRBJ2-5	CASGDAGQDTQYF	199	0.00320963		TRBV1	TRBJ1-5	CSAGTGVNRAPLF	168	0.00207458
TRBV13-1	TRBJ2-7	CASSEGYEQYF	3440	0.0466267		TRBV13-3	TRBJ1-6	CASSDRNSPLYF	3640	0.0475957		TRBV1	TRBJ1-6	CTRSADPTDNSPLYF	196	0.002799		TRBV13-1	TRBJ2-5	CASGASGTKDTQYF	199	0.00320963		TRBV13-3	TRBJ2-7	CASSDRTGGVYEQYF	168	0.00207458
TRBV13-2	TRBJ2-7	CASGDAGTLYEQYF	3437	0.0465861		TRBV1	TRBJ2-1	CSAVRGAEQYF	3636	0.0475434		TRBV1	TRBJ1-1	CGAGDTEVF	196	0.002799		TRBV13-1	TRBJ1-6	CASSDAGDSPHYF	199	0.00320963		TRBV13-2	TRBJ2-7	CASSPGTGGYEQYF	168	0.00207458
TRBV13-2	TRBJ2-7	CASGDGLGGRWEQYF	3431	0.0465047		TRBV29	TRBJ2-7	CASRGVYEQYF	3635	0.0475303		TRBV1	TRBJ2-2	CSTVRDSNTGQLYF	195	0.00278472		TRBV20	TRBJ1-6	CGARGTVNSPLYF	198	0.0031935		TRBV1	TRBJ2-7	CTRSAEGGGEQYF	167	0.00206223
TRBV13-2	TRBJ1-1	CASGEDRGNTEVF	3431	0.0465047		TRBV13-1	TRBJ2-5	CASSDRTGDTQYF	3634	0.0475172		TRBV13-2	TRBJ1-3	CASGGGGHFSGKTLYF	195	0.00278472		TRBV13-1	TRBJ1-6	CASSDEGDSPLYF	197	0.00317737		TRBV1	TRBJ2-4	CSGDKSQNTLYF	167	0.00206223
TRBV13-2	TRBJ2-7	CASGENWGGEQYF	3423	0.0463963		TRBV29	TRBJ2-1	CASSLEQGAYAEQF	3624	0.0473865		TRBV13-1	TRBJ1-1	CASGPGQGATEVF	195	0.00278472		TRBV13-1	TRBJ2-7	CASGEGTGGYEQYF	196	0.00316124		TRBV1	TRBJ1-5	CSAVEDNQAPLF	167	0.00206223
TRBV29	TRBJ1-1	CASSQNTEVF	3416	0.0463014		TRBV15	TRBJ2-7	CASSSAYEQYF	3620	0.0473342		TRBV1	TRBJ1-1	CSAAQGNTEVSF	194	0.00277044		TRBV12-1	TRBJ2-3	CASSLDGRGAETLYF	196	0.00316124		TRBV1	TRBJ1-3	CSVNSGNTLYF	167	0.00206223
TRBV31	TRBJ2-3	CAWSLGDWGLSAETLYF	3415	0.0462879		TRBV13-2	TRBJ2-1	CASGDDLGGHNYAEQF	3618	0.047308		TRBV13-2	TRBJ1-1	CVSGETGGSTEVF	193	0.00275616		TRBV1	TRBJ1-4	CSADANNESLF	195	0.00314511		TRBV5	TRBJ2-5	CAGSQDGGVQDTQYF	166	0.00204988
TRBV13-1	TRBJ2-7	CASSDGGGYEQYF	3414	0.0462743		TRBV13-1	TRBJ2-1	CASSVINYAEQF	3617	0.0472949		TRBV13-1	TRBJ2-7	CASGDAPYEQYF	193	0.00275616		TRBV1	TRBJ1-4	CSADANNARLF	195	0.00314511		TRBV5	TRBJ1-1	CASSLKTNSNTVVF	166	0.00204988
TRBV13-2	TRBJ1-1	CASGASGTINTEVF	3401	0.0460981		TRBV29	TRBJ2-1	CASRPTFNYAEQF	3599	0.0470596		TRBV1	TRBJ1-6	CSADRDSYDSPLYF	192	0.00274188		TRBV15	TRBJ2-1	CASSP_DWGYAEQF	195	0.00314511		TRBV1	TRBJ2-7	CTRSAPGGYEQYF	166	0.00204988
TRBV26	TRBJ1-2	CASSQGGRSDYTF	3392	0.0459761		TRBV13-2	TRBJ2-7	CASGRQGDEQYF	3578	0.046785		TRBV13-2	TRBJ1-1	CASGETGRSTEVF	192	0.00274188		TRBV13-1	TRBJ2-5	CASGDAGFQDTQYF	195	0.00314511		TRBV1	TRBJ2-3	CSVGQGPSAETLYF	166	0.00204988
TRBV13-2	TRBJ2-4	CASGDRAGGAGQNTLYF	3380	0.0458135		TRBV21	TRBJ2-1	CASSGTGF	3568	0.0466542		TRBV5	TRBJ1-1	CTSSQDGGDTEVF	191	0.0027276		TRBV5	TRBJ1-3	CASSPRGISGNTPYF	192	0.00309672		TRBV1	TRBJ2-3	CNVGQGNSAETLYF	166	0.00204988
TRBV26	TRBJ2-7	CASSLFREQYF	3378	0.0457864		TRBV5	TRBJ2-7	CASSQDNGEQYF	3551	0.0464319		TRBV1	TRBJ2-4	CSADQGWQNTLYF	191	0.0027276		TRBV13-2	TRBJ2-1	CASSLGANYAEQF	192	0.00309672		TRBV15	TRBJ1-1	CASSLDRANIEVF	166	0.00204988
TRBV13-2	TRBJ1-1	CASGDAGQGVANTEVF	3367	0.0456373		TRBV15	TRBJ2-4	CASSSQNTLYF	3540	0.0462881		TRBV1	TRBJ2-1	CSAEYTEQF	191	0.0027276		TRBV13-2	TRBJ1-2	CASSDGWTGGNSDYTF	192	0.00309672		TRBV13-3	TRBJ2-5	CASSGRDQDTQYF	166	0.00204988
TRBV26	TRBJ1-1	CASSPHSANTEVF	3362	0.0455695		TRBV5	TRBJ2-1	CASSQDPVYAEQF	3532	0.0461835		TRBV1	TRBJ2-2	CSAVWDSNTGQLYF	190	0.00271332		TRBV13-1	TRBJ2-7	CASSDEGDEQ_F	192	0.00309672		TRBV13-3	TRBJ2-3	CASSDARGPSAGTLYF	166	0.00204988
TRBV13-2	TRBJ2-3	CASGDAGTASAETLYF	3344	0.0453255		TRBV13-2	TRBJ1-6	CASGEPQGPYNSPLYF	3530	0.0461573		TRBV13-2	TRBJ1-4	CASSDAQGRGERLF	190	0.00271332		TRBV13-1	TRBJ1-6	CASSDAGDSPL_F	190	0.00306447		TRBV30	TRBJ1-4	CSSTAAFSNEGLF	165	0.00203753
TRBV13-2	TRBJ1-5	CASGTDNNQAPLF	3328	0.0451087		TRBV5	TRBJ1-1	CASSQGQANTEVF	3521	0.0460397		TRBV1	TRBJ2-4	CSADQGQQNTLYF	189	0.00269904		TRBV1	TRBJ1-1	CSADANNERLF	189	0.00304834		TRBV1	TRBJ2-1	CSAGHNDYAEQF	165	0.00203753
TRBV13-1	TRBJ2-1	CASSDVGAEQYF	3325	0.045068		TRBV31	TRBJ1-2	CAWSLDRNSDYTF	3517	0.0459874		TRBV5	TRBJ1-2	CASRTANSDYTF	187	0.00267048		TRBV13-3	TRBJ2-7	CAGSDTGGVEQYF	189	0.00304834		TRBV16	TRBJ1-1	CASSLVGTDTEAF	165	0.00203753
TRBV29	TRBJ2-3	CASSPGTGEAETLYF	3322	0.0450273		TRBV5	TRBJ1-1	CASSQEGGAEVF	3488	0.0456082		TRBV1	TRBJ1-1	CSTGGNTEVF	186	0.0026562		TRBV1	TRBJ1-4	CSADANNERLCF	188	0.00303221		TRBV15	TRBJ1-2	CASSFRANSDYTF	165	0.00203753
TRBV13-2	TRBJ2-1	CASGGSGGADAEQF	3320	0.0450002		TRBV13-1	TRBJ2-7	CASSDPDREEYEQYF	3483	0.0455428		TRBV1	TRBJ1-1	CSPGQSNTEVSF	186	0.0026562		TRBV1	TRBJ1-1	CGADGRNTEVF	188	0.00303221		TRBV12-1	TRBJ2-7	CASSPLGQGGEQYF	165	0.00203753
TRBV1	TRBJ2-1	CSADAGGNYAEQF	3319	0.0449867		TRBV13-2	TRBJ1-2	CASGSDGSDYTF	3481	0.0455166		TRBV1	TRBJ1-1	CSAVQGNTEVF	186	0.0026562		TRBV12-1	TRBJ2-7	CASSPDETYEQYF	186	0.00299995		TRBV2	TRBJ1-6	CASSPDSSYNSPLYF	164	0.00202518
TRBV13-2	TRBJ2-2	CASGAGTANTGQLYF	3314	0.0449189		TRBV1	TRBJ2-3	CSADWGTSAETLYF	3480	0.0455035		TRBV13-2	TRBJ1-2	CASGAAGGSDYTF	186	0.0026562		TRBV15	TRBJ2-1	CASSWDRAEQF	183	0.00295156		TRBV15	TRBJ1-1	CASSQGQGDTEVF	164	0.00202518
TRBV13-2	TRBJ2-3	CASGEGGASAETLYF	3312	0.0448918		TRBV13-3	TRBJ2-7	CAGSGASQGYEQYF	3475	0.0454382		TRBV1	TRBJ2-4	CSADLGRQNALYF	185	0.00264192		TRBV15	TRBJ2-1	CASSPWD_GYAEQF	183	0.00295156		TRBV13-3	TRBJ2-5	CASSDRDQDAQYF	164	0.00202518
TRBV13-2	TRBJ2-4	CASGDDGGSQNTLYF	3311	0.0448782		TRBV13-3	TRBJ1-1	CASSDRGTEVF	3464	0.0452943		TRBV1	TRBJ1-5	CSGGTNNQAPLF	185	0.00264192		TRBV31	TRBJ1-1	CAWGLGAANTEVF	181	0.00291931		TRBV13-2	TRBJ1-2	CTCRGPDYTF	164	0.00202518
TRBV13-2	TRBJ1-6	CASGDLGYNSPLYF	3310	0.0448647		TRBV5	TRBJ1-5	CASSPTGREAPLF	3453	0.0451505		TRBV1	TRBJ1-1	CGPGQSNTEVF	185	0.00264192		TRBV15	TRBJ2-1	CASSLGANYAEQF	181	0.00291931		TRBV5	TRBJ2-7	CASSSLGDYEQYF	163	0.00201283
TRBV13-1	TRBJ2-1	CASRDFYAEQF	3310	0.0448647		TRBV31	TRBJ2-7	CAWVRDSTYEQYF	3439	0.0449674		TRBV13-2	TRBJ2-4	CASSGTTSQNTLYF	185	0.00264192		TRBV13-2	TRBJ2-5	CASSWTGGHQDTQYF	181	0.00291931		TRBV1	TRBJ2-7	CSADLGGNGQYF	163	0.00201283
TRBV5	TRBJ2-5	CASSQVKREDTQYF	3308	0.0448376		TRBV16	TRBJ1-4	CASSQGQNERLF	3428	0.0448236		TRBV13-1	TRBJ2-7	CASGDIWGSSYEQYF	185	0.00264192		TRBV13-1	TRBJ2-7	CASSLDWAGSYEQYF	181	0.00291931		TRBV1	TRBJ2-7	CSAGGGGEQYF	162	0.00200049
TRBV29	TRBJ2-3	CASSLEHSAETLYF	3305	0.0447969		TRBV13-3	TRBJ2-4	CASSDGDWGLENTLYF	3423	0.0447582		TRBV1	TRBJ1-3	CSAGGRFYGNTLYF	184	0.00262764		TRBV1	TRBJ2-5	CSAVNQGTQYF	180	0.00290318		TRBV1	TRBJ2-5	CTRSAEGQDTQYF	162	0.00200049
TRBV29	TRBJ1-1	CASSLGTANTEVF	3303	0.0447698		TRBV21	TRBJ2-7	CASSLRDNPYEQYF	3419	0.0447059		TRBV13-2	TRBJ2-7	CASGESQGNEQYF	184	0.00262764		TRBV1	TRBJ1-4	CSADANNEILF	180	0.00290318		TRBV1	TRBJ2-5	CSAVGGQDTQYF	162	0.00200049
TRBV13-2	TRBJ1-1	CASGDEGGETEVF	3297	0.0446885		TRBV29	TRBJ2-7	CASSPGHYEQYF	3405	0.0445229		TRBV5	TRBJ2-1	CASGPRDNYAEQF	183	0.00261336		TRBV13-2	TRBJ2-5	CASSRTGVQDTQYF	179	0.00288705		TRBV1	TRBJ2-3	CSVGQGNNAETLYF	162	0.00200049
TRBV5	TRBJ2-2	CASSHTGGANTGQLYF	3295	0.0446614		TRBV1	TRBJ1-3	CSADNSGNTLYF	3401	0.0444706		TRBV1	TRBJ1-6	CGAAGNSPLYF	183	0.00261336		TRBV13-2	TRBJ2-1	CASSCGRESNYAEQF	179	0.00288705		TRBV1	TRBJ2-1	CSADEGNYAGQF	162	0.00200049
TRBV15	TRBJ1-1	CASRPGTNTEVF	3281	0.0444716		TRBV13-3	TRBJ2-5	CASRPGLGKDTQYF	3398	0.0444313		TRBV1	TRBJ1-1	CSAAGGDTEVLF	182	0.00259907		TRBV1	TRBJ2-7	CSAVGGK_EQYF	178	0.00287092		TRBV1	TRBJ1-1	CSADGANAEVF	162	0.00200049
TRBV13-2	TRBJ1-2	CASGDASNSDYTF	3275	0.0443903		TRBV13-1	TRBJ2-5	CASSEGQGGDTQYF	3392	0.0443529		TRBV13-2	TRBJ1-4	CASGDASDERLF	182	0.00259907		TRBV14	TRBJ1-1	CASSLGGTEVF	178	0.00287092		TRBV13-1	TRBJ1-1	CASSGTSTEVF	162	0.00200049
TRBV13-2	TRBJ1-4	CASGDATGGNERLF	3271	0.0443361		TRBV13-2	TRBJ1-4	CASGDNNERLF	3386	0.0442744		TRBV1	TRBJ2-7	CSADMGGSSYEQYF	181	0.00258479		TRBV5	TRBJ1-5	CASSQDLGYNNQAPLF	177	0.00285479		TRBV1	TRBJ2-5	CSAVDGGLDTQYF	161	0.00198814
TRBV13-2	TRBJ2-7	CASGDGTGGVEQYF	3259	0.0441734		TRBV31	TRBJ1-3	CAWSLGGVLSGNTLYF	3381	0.0442091		TRBV13-2	TRBJ2-5	CASGDHWANQDTQYF	181	0.00258479		TRBV13-1	TRBJ2-7	CASGDEQYF	177	0.00285479		TRBV1	TRBJ2-4	CSAGGLGGSQNTLYF	161	0.00198814
TRBV13-2	TRBJ2-2	CASGDAGTQNTGQLYF	3251	0.044065		TRBV5	TRBJ1-1	CASSQDGGRGVF	3366	0.0440129		TRBV13-2	TRBJ1-4	CASGDASNGRLF	181	0.00258479		TRBV13-1	TRBJ2-2	CASGAWGANTGQLYF	177	0.00285479		TRBV1	TRBJ2-3	CSVGQGNSAEMLYF	161	0.00198814
TRBV26	TRBJ2-7	CASSLSGQSYEQYF	3244	0.0439701		TRBV13-2	TRBJ2-7	CASGEGYEQYF	3361	0.0439475		TRBV13-2	TRBJ1-5	CASSSGTGDNQAPLF	180	0.00257051		TRBV1	TRBJ2-3	CSADGAGGAETLYF	176	0.00283866		TRBV1	TRBJ2-1	CKPGLGDAGQF	161	0.00198814
TRBV13-2	TRBJ2-4	CASGEGGAGGNTLYF	3242	0.043943		TRBV13-2	TRBJ1-1	CASGEGGANTEVF	3359	0.0439214		TRBV13-2	TRBJ1-1	CASGETGESTEVF	180	0.00257051		TRBV13-2	TRBJ1-4	CASSAGTGYERLF	175	0.00282253		TRBV13-1	TRBJ1-1	CASSLKTNSNTEVF	161	0.00198814
TRBV13-2	TRBJ2-1	CASGEGWVNYAEQF	3232	0.0438074		TRBV13-3	TRBJ1-4	CASSDRGLSNERLF	3345	0.0437383		TRBV13-2	TRBJ2-4	CASSDKNTLYF	178	0.00254195		TRBV1	TRBJ1-4	CSAVANNERLF	174	0.00280641		TRBV2	TRBJ1-1	CASSQEWTITEVF	160	0.00197579
TRBV29	TRBJ1-3	CASSSTDSGNTLYF	3227	0.0437397		TRBV13-2	TRBJ1-6	CASGDRGRNSPLYF	3333	0.0435814		TRBV1	TRBJ1-4	CSADQGADDERLF	177	0.00252767		TRBV13-1	TRBJ2-5	CASGDAGGRGQDTQYF	174	0.00280641		TRBV1	TRBJ2-1	CSARDSNYAEQLF	160	0.00197579
TRBV13-2	TRBJ2-5	CASGDPLQDTQYF	3222	0.0436719		TRBV13-1	TRBJ2-2	CASSDATGQLYF	3327	0.043503		TRBV1	TRBJ1-1	CSPGQSNAEVF	177	0.00252767		TRBV29	TRBJ2-1	CASSCGRGSNYAEQF	173	0.00279028		TRBV1	TRBJ1-5	CSAVGDNQAPPF	160	0.00197579
TRBV16	TRBJ2-3	CASSVRDTETLYF	3214	0.0435635		TRBV21	TRBJ1-2	CASRGQGDSDYTF	3326	0.0434899		TRBV13-1	TRBJ1-1	CASSDAQKDTEVLF	177	0.00252767		TRBV12-1	TRBJ2-7	CASSPNKTYEQYF	172	0.00277415		TRBV1	TRBJ1-1	CRASGGVTEVF	160	0.00197579
TRBV13-2	TRBJ1-2	CASGPDRGANSDYTF	3192	0.0432653		TRBV29	TRBJ2-7	CASSFEQYEQYF	3325	0.0434768		TRBV13-2	TRBJ1-4	CASGDASNERSF	176	0.00251339		TRBV26	TRBJ2-4	CASSRQGAQNTLYF	171	0.00275802		TRBV12-1	TRBJ1-6	CASSRQDYNSPLYF	160	0.00197579
TRBV3	TRBJ2-1	CASSSTGVNYAEQF	3190	0.0432382		TRBV5	TRBJ2-1	CASSQTGNYAEQF	3324	0.0434637		TRBV1	TRBJ2-4	CSADPGRQNTLYF	175	0.00249911		TRBV1	TRBJ1-1	CSADYTEVSF	171	0.00275802		TRBV26	TRBJ2-4	CASSPRGRQNTLHF	159	0.00196344
TRBV13-2	TRBJ2-4	CASGGWENTLYF	3189	0.0432246		TRBV5	TRBJ1-6	CASSQDSDSYNSPLYF	3323	0.0434507		TRBV13-2	TRBJ1-4	CASSDDGGSNERLF	175	0.00249911		TRBV13-2	TRBJ1-3	CASGERGSGNTLYF	171	0.00275802		TRBV1	TRBJ2-5	CSAGQSGGGTQYF	159	0.00196344
TRBV13-2	TRBJ1-5	CASGPGQHDQAPLF	3188	0.0432111		TRBV1	TRBJ1-5	CSADDRRGYNNQAPLF	3322	0.0434376		TRBV1	TRBJ2-3	CSAGRTSAETLYF	174	0.00248483		TRBV1	TRBJ2-3	CSAGRAGGAETLYF	170	0.00274189		TRBV1	TRBJ2-4	CSAGRGQNTLYF	159	0.00196344
TRBV13-1	TRBJ1-1	CASSESTGRGTEVF	3187	0.0431975		TRBV29	TRBJ2-1	CASSRLGGRAEQF	3312	0.0433068		TRBV5	TRBJ2-5	CASSSTGNNQDTQYF	173	0.00247055		TRBV17	TRBJ1-4	CASGREGNERLF	170	0.00274189		TRBV14	TRBJ1-1	CASSLKTNSNTEVF	159	0.00196344
TRBV15	TRBJ2-7	CASRPGTNYEQYF	3175	0.0430348		TRBV13-1	TRBJ2-7	CASSGDTYEQYF	3306	0.0432284		TRBV13-2	TRBJ2-4	CASSPTENTLYF	173	0.00247055		TRBV15	TRBJ2-1	CANSPWDWGYAEQF	169	0.00272576		TRBV13-3	TRBJ2-3	CASSDAQVAETLYF	159	0.00196344
TRBV13-2	TRBJ2-3	CASGGTGGVSAETLYF	3173	0.0430077		TRBV29	TRBJ2-5	CASSFGMGGVNQDTQYF	3304	0.0432022		TRBV13-2	TRBJ1-1	CASGETGGSTKVF	172	0.00245627		TRBV1	TRBJ2-1	CSDWEYYAEQF	167	0.0026935		TRBV1	TRBJ2-5	CGASRDPGGDTQYF	158	0.00195109
TRBV13-3	TRBJ1-4	CASSNRDRTNERLF	3165	0.0428993		TRBV29	TRBJ1-1	CASSLSPGNTEVF	3288	0.042993		TRBV1	TRBJ2-4	CSADLGRQDTLYF	171	0.00244199		TRBV13-1	TRBJ1-6	CASSDAGESPLYF	167	0.0026935		TRBV1	TRBJ2-3	CSAGGDRAPAETLYF	158	0.00195109
TRBV13-2	TRBJ2-4	CASGDLWGRNTLYF	3165	0.0428993		TRBV13-1	TRBJ2-4	CASSDPGSQNTLYF	3288	0.042993		TRBV1	TRBJ1-1	CSPRQSNTEVF	171	0.00244199		TRBV15	TRBJ2-1	CASSPWDWGYTEQF	166	0.00267738		TRBV31	TRBJ2-1	CAWSLTGGVHAEQF	157	0.00193874
TRBV29	TRBJ2-4	CASSLRGSQNTLYF	3154	0.0427502		TRBV29	TRBJ1-1	CASSLSGANTEVF	3287	0.0429799		TRBV31	TRBJ2-2	CARSLPRGSNTGQLYF	170	0.00242771		TRBV13-1	TRBJ2-5	CASGDDQDTQYF	166	0.00267738		TRBV1	TRBJ2-7	CSAGGRGYEQYF	157	0.00193874
TRBV13-1	TRBJ2-5	CASSDAGQEDTQYF	3153	0.0427367		TRBV29	TRBJ2-7	CASSFGEQYF	3285	0.0429538		TRBV1	TRBJ2-2	CSAVRDSHTGQLYF	170	0.00242771		TRBV12-1	TRBJ2-7	CASGDYRASYEQYF	166	0.00267738		TRBV1	TRBJ1-1	CSAGGTEVF	157	0.00193874
TRBV13-2	TRBJ1-2	CASGDAGVASDYTF	3148	0.0426689		TRBV13-2	TRBJ2-5	CASGEPGLGEDTQYF	3285	0.0429538		TRBV13-3	TRBJ2-1	CASSDQSYAEQSF	170	0.00242771		TRBV5	TRBJ1-5	CASGQDLSYNNQAPLF	165	0.00266125		TRBV1	TRBJ1-1	CSADGASTEVF	157	0.00193874
TRBV29	TRBJ2-7	CASSLGEQYF	3142	0.0425876		TRBV29	TRBJ2-1	CAAGTGVAEQF	3269	0.0427446		TRBV1	TRBJ2-1	CSADGLGGCAEQF	169	0.00241343		TRBV13-3	TRBJ2-7	CASSLDWAGSYEQYF	165	0.00266125		TRBV13-1	TRBJ2-7	CASGGQPYEQYF	157	0.00193874
TRBV13-1	TRBJ2-7	CASSDGTGGYEQYF	3136	0.0425062		TRBV13-1	TRBJ2-7	CASSDGGYEQYF	3265	0.0426923		TRBV1	TRBJ1-1	CSPGQSSTEVF	169	0.00241343		TRBV13-2	TRBJ2-3	CASSAQGSSAETLYF	165	0.00266125		TRBV13-1	TRBJ2-1	CSDDRTGLSEQF	157	0.00193874
TRBV13-2	TRBJ2-2	CASGGTGGDTGQLYF	3132	0.042452		TRBV13-1	TRBJ2-1	CASSPWGGDYAEQF	3265	0.0426923		TRBV13-1	TRBJ1-1	CASSGAQKDTEVF	168	0.00239915		TRBV13-1	TRBJ2-5	CASGDARDWGGDTQYF	165	0.00266125		TRBV5	TRBJ2-1	CASSPGTGGRAEQF	156	0.00192639
TRBV31	TRBJ1-6	CAWSLGAYNSPLYF	3125	0.0423571		TRBV31	TRBJ1-4	CAWSARVANERLF	3262	0.042653		TRBV1	TRBJ2-1	CSAGRAEQSF	167	0.00238487		TRBV13-1	TRBJ1-6	CASSLEYNSPLYF	165	0.00266125		TRBV1	TRBJ1-5	CTRSADRGAAPLF	156	0.00192639
TRBV5	TRBJ2-3	CASSPTGGPSAETLYF	3124	0.0423436		TRBV13-2	TRBJ1-1	CASGAPGPNTEVF	3260	0.0426269		TRBV13-2	TRBJ2-3	CASSPSGTGVAETLYF	167	0.00238487		TRBV12-1	TRBJ2-7	CASFPDKTYEQYF	165	0.00266125		TRBV5	TRBJ1-3	CASSFRGGNTLYF	155	0.00191405
TRBV5	TRBJ1-4	CASSQEGRGTNERLF	3122	0.0423165		TRBV21	TRBJ2-7	CASSPGLFYEQYF	3257	0.0425877		TRBV13-1	TRBJ2-7	CASSDVGCEQYF	167	0.00238487		TRBV31	TRBJ1-1	CARSLGAANTEVF	163	0.00262899		TRBV4	TRBJ2-1	CASSRDRGQRYAEQF	155	0.00191405
TRBV29	TRBJ2-3	CASSLPGSAETLYF	3119	0.0422758		TRBV13-1	TRBJ2-1	CASSDELANYAEQF	3248	0.04247		TRBV13-1	TRBJ2-2	CASGETGANTGQLYF	167	0.00238487		TRBV12-1	TRBJ2-7	CASRDWGYEQYF	163	0.00262899		TRBV1	TRBJ2-1	CSARDSNYAEQSF	155	0.00191405
TRBV16	TRBJ2-1	CASSSRRGNYAEQF	3111	0.0421674		TRBV5	TRBJ1-4	CASSQTGGLSNERLF	3245	0.0424308		TRBV1	TRBJ2-4	CSGQSQSTLYF	166	0.00237058		TRBV13-2	TRBJ2-5	CASRTGGAQDTQYF	162	0.00261286		TRBV1	TRBJ1-6	CTRSAGQYNSPLYF	155	0.00191405
TRBV13-2	TRBJ2-1	CASGDGTGGYAEQF	3111	0.0421674		TRBV13-2	TRBJ1-4	CASGVPGTGGDERLF	3245	0.0424308		TRBV1	TRBJ2-4	CSAELGRQNTLYF	165	0.0023563		TRBV13-2	TRBJ2-5	CASGGAGGRGQDTQYF	161	0.00259673		TRBV13-3	TRBJ1-1	CAGSVTGEEVF	155	0.00191405
TRBV13-3	TRBJ1-1	CASTGNTEVF	3106	0.0420996		TRBV29	TRBJ2-7	CASRNRSSYEQYF	3238	0.0423392		TRBV1	TRBJ1-1	CSADISTEVF	165	0.0023563		TRBV13-2	TRBJ1-2	CASGEDSANSDYTF	161	0.00259673		TRBV13-3	TRBJ2-7	CASSPGLFYEQYF	154	0.0019017
TRBV29	TRBJ2-3	CASRHRGRGGAETLYF	3105	0.042086		TRBV5	TRBJ2-5	CASSQKRGGRDQDTQYF	3232	0.0422608		TRBV1	TRBJ2-5	CTRSAGNQDTQYF	164	0.00234202		TRBV13-1	TRBJ2-7	CASGGPGLSSYEQYF	161	0.00259673		TRBV5	TRBJ2-5	CASSQDGGVQGTQYF	153	0.00188935
TRBV13-2	TRBJ2-7	CASGGTGGARNEQYF	3094	0.041937		TRBV13-1	TRBJ1-2	CASSDAWGRNSDYTF	3218	0.0420777		TRBV1	TRBJ1-6	CSAAGNSPPYF	164	0.00234202		TRBV31	TRBJ1-4	CAWSHISQILQDRQLGSMTEK_SF	160	0.0025806		TRBV5	TRBJ1-5	CANSQDWGGNNQAPLF	153	0.00188935
TRBV29	TRBJ1-1	CASSLSGNTEVF	3093	0.0419234		TRBV3	TRBJ2-1	CASSPDWGNYAEQF	3200	0.0418423		TRBV1	TRBJ1-1	CSAGQGNTEVF	164	0.00234202		TRBV13-1	TRBJ2-3	CASGDAGAETLYF	159	0.00256447		TRBV5	TRBJ1-1	CASSLKTNSNTAVF	153	0.00188935
TRBV13-1	TRBJ1-6	CASSDVQGSNSPLYF	3088	0.0418556		TRBV29	TRBJ2-7	CASSLYEQYF	3196	0.04179		TRBV13-1	TRBJ2-7	CASGSTGYEQYF	164	0.00234202		TRBV5	TRBJ1-5	CASSQGLSYNNQAPLF	158	0.00254835		TRBV26	TRBJ2-5	CAGSLNRDTQYF	153	0.00188935
TRBV5	TRBJ2-5	CASSQEGEDTQYF	3077	0.0417065		TRBV29	TRBJ2-3	CASSLARGSAETLYF	3192	0.0417377		TRBV13-1	TRBJ1-1	CAGSDAQKDTEVF	164	0.00234202		TRBV13-2	TRBJ2-7	CASSDAQ_CVASFTLQSSYEQYF	158	0.00254835		TRBV1	TRBJ2-4	CSGDNRQNTLYF	153	0.00188935
TRBV13-1	TRBJ2-1	CASSDVGNYAEQF	3075	0.0416794		TRBV29	TRBJ2-4	CASSSGTGGNTLYF	3180	0.0415808		TRBV13-2	TRBJ1-4	CTSGDASNERLF	162	0.00231346		TRBV15	TRBJ2-1	CASSPWDWGYAEPF	157	0.00253222		TRBV1	TRBJ2-4	CNGDNSQNTLYF	153	0.00188935
TRBV13-1	TRBJ2-1	CASRGRIYAEQF	3075	0.0416794		TRBV1	TRBJ1-1	CSGGRSNTEVF	3180	0.0415808		TRBV13-1	TRBJ1-1	CASGDGRSNTEVF	162	0.00231346		TRBV13-2	TRBJ1-2	CASGEDDANSDYTF	157	0.00253222		TRBV1	TRBJ1-3	CSATGAGGNTLYF	153	0.00188935
TRBV13-1	TRBJ2-5	CASSGDWGIQDTQYF	3065	0.0415439		TRBV1	TRBJ1-1	CSADSQGVF	3178	0.0415547		TRBV5	TRBJ2-1	CASSQDRDRDDEQYF	161	0.00229918		TRBV12-1	TRBJ2-7	CASSLDKSYE_YF	156	0.00251609		TRBV13-3	TRBJ2-7	CASSGLGEGEQYF	153	0.00188935
TRBV26	TRBJ1-4	CASSKQGATNERLF	3063	0.0415168		TRBV14	TRBJ2-7	CASSFKGDEQYF	3177	0.0415416		TRBV5	TRBJ2-1	CASSLGLGGNYAEQF	161	0.00229918		TRBV13-3	TRBJ2-3	CASSATSAEALYF	155	0.00249996		TRBV1	TRBJ2-5	CTRSNPTGGPNQDTQYF	152	0.001877
TRBV16	TRBJ2-7	CASSRAGGAGYEQYF	3060	0.0414761		TRBV29	TRBJ2-2	CASSRQNTGQLYF	3158	0.0412932		TRBV1	TRBJ2-5	CSAASLGGRDAQYF	161	0.00229918		TRBV13-2	TRBJ1-1	CASSPPANTEVF	155	0.00249996		TRBV1	TRBJ2-1	CSAGEGNYAEQF	152	0.001877
TRBV13-1	TRBJ2-7	CASSSVYEQYF	3059	0.0414626		TRBV13-1	TRBJ2-3	CASSDEGLGGETLYF	3157	0.0412801		TRBV13-2	TRBJ2-5	CASGERQGNEQYF	161	0.00229918		TRBV13-2	TRBJ2-1	CASSPWDWGYAEQF	154	0.00248383		TRBV1	TRBJ1-3	CSVGQGNSAETLYF	152	0.001877
TRBV13-2	TRBJ1-6	CASGDGVKNSYNSPLYF	3058	0.041449		TRBV16	TRBJ2-3	CASSFRGGAETLYF	3148	0.0411624		TRBV1	TRBJ2-2	CSAEGQGAGQPYF	160	0.0022849		TRBV1	TRBJ1-4	CSADANNVRLF	153	0.0024677		TRBV1	TRBJ1-3	CSATGVGGNTPYF	152	0.001877
TRBV31	TRBJ1-1	CAWSLARATEVF	3044	0.0412592		TRBV16	TRBJ2-7	CASSLGTGYEQYF	3146	0.0411363		TRBV13-2	TRBJ2-7	CASSERQGNEQYF	160	0.0022849		TRBV1	TRBJ1-4	CSADANNE_LF	153	0.0024677		TRBV13-2	TRBJ2-1	CASSLGGVNAEQF	152	0.001877
TRBV13-2	TRBJ1-1	CASGDAGVDTEVF	3044	0.0412592		TRBV29	TRBJ2-1	CASSPGTGGAEQF	3145	0.0411232		TRBV1	TRBJ2-5	CSAGNQGTQYF	159	0.00227062		TRBV1	TRBJ1-4	CSADAKNERLF	153	0.0024677		TRBV13-2	TRBJ1-2	CASSDRADYTF	152	0.001877
TRBV13-2	TRBJ1-4	CASGVGHISNERLF	3040	0.041205		TRBV5	TRBJ1-6	CASSQDRYNSPLYF	3143	0.041097		TRBV1	TRBJ2-2	CTYSAVRDSNTGQLYF	158	0.00225634		TRBV12-1	TRBJ2-7	CASSSGFYEQYF	153	0.0024677		TRBV5	TRBJ2-7	CASSRGGREQYF	151	0.00186465
TRBV29	TRBJ2-4	CASSPTGGTGASQNTLYF	3033	0.0411101		TRBV31	TRBJ1-3	CAWSTGSGNTLYF	3142	0.041084		TRBV1	TRBJ1-6	CSADQDSYNSPLYF	158	0.00225634		TRBV15	TRBJ2-1	CASSLDGFNYAEQF	151	0.00243544		TRBV5	TRBJ2-7	CASSPGPFYEQYF	151	0.00186465
TRBV13-2	TRBJ2-1	CASGGGLGSYNYAEQF	3029	0.0410559		TRBV29	TRBJ1-4	CASSSGTSERLF	3141	0.0410709		TRBV13-2	TRBJ2-7	CASGERQGNEQHF	158	0.00225634		TRBV13-1	TRBJ2-4	CASGDTSQNTLYF	151	0.00243544		TRBV5	TRBJ1-1	CASSQKTNSNTEVF	151	0.00186465
TRBV13-1	TRBJ2-5	CASSEDWGGAWDTQYF	3027	0.0410288		TRBV29	TRBJ2-7	CASSLAGRSYEQYF	3121	0.0408094		TRBV1	TRBJ2-3	CTRSADPETLYF	157	0.00224206		TRBV13-2	TRBJ1-2	CASGEDNANSDCTF	150	0.00241932		TRBV1	TRBJ2-3	CGADGDRAPAETLYF	151	0.00186465
TRBV13-1	TRBJ2-1	CASSDPDNYAEQF	3025	0.0410017		TRBV29	TRBJ2-4	CASSFDWDTLYF	3115	0.0407309		TRBV13-2	TRBJ2-5	CAGGDGGVDTQYF	157	0.00224206		TRBV13-1	TRBJ1-6	CASSDAGDSPRYF	150	0.00241932		TRBV13-2	TRBJ2-5	CASGEGTGQDAQYF	151	0.00186465
TRBV13-1	TRBJ1-5	CASSEGQNNQAPLF	3010	0.0407984		TRBV5	TRBJ1-2	CASSRQGPNSDYTF	3098	0.0405086		TRBV13-2	TRBJ1-1	CASSDGGGTEVF	157	0.00224206		TRBV12-1	TRBJ1-2	CASSLGGNSDYTF	150	0.00241932		TRBV13-2	TRBJ2-1	CASGGGQGDYAEQF	151	0.00186465
TRBV29	TRBJ1-6	CASSLRTGYNSPLYF	3009	0.0407848		TRBV1	TRBJ1-4	CSADWGGANERLF	3086	0.0403517		TRBV13-1	TRBJ2-1	CASGDAEQF	157	0.00224206		TRBV31	TRBJ1-2	CAWKGRGGSDYTF	149	0.00240319		TRBV5	TRBJ2-7	CASSLLGQGGEQYF	150	0.0018523
TRBV13-2	TRBJ2-5	CASGGGFNQDTQYF	3003	0.0407035		TRBV13-1	TRBJ1-6	CASSDEDTSYNSPLYF	3071	0.0401556		TRBV1	TRBJ1-1	CSPGRSNTEVF	156	0.00222778		TRBV1	TRBJ1-1	CGADRGGITEVF	149	0.00240319		TRBV1	TRBJ1-3	CGINSGNTLYF	150	0.0018523
TRBV13-1	TRBJ1-5	CASSDAGGQAPLF	3001	0.0406764		TRBV29	TRBJ1-1	CASSPPGQPNTEVF	3070	0.0401425		TRBV13-2	TRBJ2-4	CTCSADQGRQNTLYF	156	0.00222778		TRBV13-2	TRBJ1-3	CASGDAPGQNSGNTLYF	149	0.00240319		TRBV30	TRBJ1-4	CSSTAASSNERLF	149	0.00183995
TRBV16	TRBJ2-4	CASSLEENTLYF	2998	0.0406357		TRBV16	TRBJ1-4	CASSLGQGGSNERLF	3069	0.0401294		TRBV13-2	TRBJ1-1	CASSDPREGNTEVF	156	0.00222778		TRBV13-1	TRBJ2-5	CASGDWEGTQYF	149	0.00240319		TRBV1	TRBJ1-6	CSAGQRSSPLYF	149	0.00183995
TRBV13-1	TRBJ2-7	CASSGTGGSSYEQYF	2997	0.0406222		TRBV13-1	TRBJ2-7	CASSDAGSSYEQYF	3069	0.0401294		TRBV13-2	TRBJ2-7	CASGERQGNEQCF	155	0.0022135		TRBV13-1	TRBJ1-5	CASGEEGNNQAPLF	149	0.00240319		TRBV1	TRBJ1-5	CSAGRGAAPLF	149	0.00183995
TRBV13-1	TRBJ2-5	CASSGQDTQYF	2997	0.0406222		TRBV13-2	TRBJ2-7	CASSDASQGYEQYF	3054	0.0399333		TRBV13-1	TRBJ2-2	CASGANTGQLYF	155	0.0022135		TRBV15	TRBJ2-1	CASRSTGGCNYAEQF	148	0.00238706		TRBV5	TRBJ2-5	CASSLDEGADQDTQYF	148	0.0018276
TRBV13-1	TRBJ2-5	CASSEPPGGQDTQYF	2997	0.0406222		TRBV29	TRBJ1-5	CASRPGHNNQAPLF	3050	0.039881		TRBV5	TRBJ2-3	CAGSPGTSSAETLYF	154	0.00219922		TRBV13-3	TRBJ2-7	CASSGAGGHEQYF	147	0.00237093		TRBV1	TRBJ2-1	CKPGLGDAEQLF	148	0.0018276
TRBV13-2	TRBJ1-1	CASGDRNTEVF	2992	0.0405544		TRBV15	TRBJ2-1	CASSWTGGALTEQF	3050	0.039881		TRBV13-2	TRBJ1-1	CASGETEGSTEVF	154	0.00219922		TRBV13-1	TRBJ2-2	CASGDRQQQNTGQLYF	147	0.00237093		TRBV1	TRBJ1-6	CTRSAGQRNSPLYF	148	0.0018276
TRBV13-1	TRBJ1-5	CASSSNNQAPLF	2992	0.0405544		TRBV16	TRBJ2-5	CASSSGTGGDTQYF	3037	0.039711		TRBV1	TRBJ2-1	CTRSAGRAEQF	153	0.00218494		TRBV1	TRBJ2-5	CSAVNQDAQYF	146	0.0023548		TRBV1	TRBJ1-5	CTRSATGINQAPLF	148	0.0018276
TRBV29	TRBJ2-2	CASSLGTGDTGQLYF	2991	0.0405409		TRBV29	TRBJ2-5	CASSRDNNQDTQYF	3016	0.0394364		TRBV1	TRBJ1-3	CSPGDRFYGNTLYF	153	0.00218494		TRBV1	TRBJ1-1	CSADGRNTEVSF	146	0.0023548		TRBV1	TRBJ1-1	CSADRNTEAF	148	0.0018276
TRBV5	TRBJ2-7	CASSLPGRVYEQYF	2983	0.0404324		TRBV13-2	TRBJ2-7	CASGDAPGGSEQYF	3005	0.0392926		TRBV13-2	TRBJ1-1	CASGQGRGTEVF	153	0.00218494		TRBV15	TRBJ2-1	CVSSPWDWGYAEQF	146	0.0023548		TRBV5	TRBJ2-5	CAGSQDNQDTQYF	147	0.00181526
TRBV13-1	TRBJ2-4	CASSGSQNTLYF	2983	0.0404324		TRBV1	TRBJ1-1	CSARDGNTEVF	3004	0.0392795		TRBV1	TRBJ1-3	CSAANSGNTLYF	152	0.00217066		TRBV13-2	TRBJ2-4	CASSAWGSSQNTLYF	146	0.0023548		TRBV5	TRBJ2-3	CASSQDGGAVAETLCF	147	0.00181526
TRBV13-2	TRBJ2-7	CASGGSSYEQYF	2981	0.0404053		TRBV13-1	TRBJ1-6	CASSGQSSYNSPLYF	2999	0.0392141		TRBV13-2	TRBJ2-3	CASGDQLGGSAEALYF	152	0.00217066		TRBV12-1	TRBJ2-7	CASSLDKNYEQYF	146	0.0023548		TRBV5	TRBJ2-1	CASSQGLGGRGAEQSF	147	0.00181526
TRBV16	TRBJ2-4	CASSSGQNTLYF	2980	0.0403918		TRBV5	TRBJ1-2	CASSHRQMDSDYTF	2996	0.0391749		TRBV13-2	TRBJ1-2	CAGGATGGSDYTF	152	0.00217066		TRBV13-1	TRBJ2-7	CASSDAQ_CVASFTLQSSYEQYF	145	0.00233867		TRBV30	TRBJ1-4	CSSTAAFSDERLF	147	0.00181526
TRBV16	TRBJ2-5	CASSSGGPDTQYF	2978	0.0403647		TRBV16	TRBJ2-3	CASILRGDGAETLYF	2979	0.0389526		TRBV13-1	TRBJ2-5	CASSDRLGGEDTQYF	152	0.00217066		TRBV15	TRBJ2-1	CASSPWDWDYAEQF	144	0.00232254		TRBV26	TRBJ2-4	CASSPRGRQNTSYF	147	0.00181526
TRBV13-1	TRBJ1-5	CASSDARAANNQAPLF	2978	0.0403647		TRBV13-2	TRBJ2-3	CASGDPSAETLYF	2973	0.0388742		TRBV29	TRBJ2-1	CASSLWTEQYF	151	0.00215638		TRBV15	TRBJ1-4	CASSLSRFSNERLF	144	0.00232254		TRBV1	TRBJ2-5	CTRSAVDRGLDTQYF	147	0.00181526
TRBV13-2	TRBJ2-7	CASGDAGGVYEQYF	2977	0.0403511		TRBV29	TRBJ2-4	CANSLEGGSQNTLYF	2971	0.038848		TRBV13-1	TRBJ2-7	CASSEILGGYELYF	151	0.00215638		TRBV13-3	TRBJ2-4	CASSAWGSSQNALYF	144	0.00232254		TRBV1	TRBJ2-4	CTRSADRGQNTLYF	147	0.00181526
TRBV13-2	TRBJ2-7	CASGDGGYEQYF	2976	0.0403375		TRBV29	TRBJ2-4	CASSLRDSQNTLYF	2966	0.0387826		TRBV5	TRBJ2-3	CASSPGTSSAETPYF	150	0.00214209		TRBV13-2	TRBJ2-5	CASSDAKDNQDTQYF	144	0.00232254		TRBV1	TRBJ2-3	CSAPTGGGGA_TLYF	147	0.00181526
TRBV5	TRBJ1-6	CASSQDRANSPLYF	2975	0.040324		TRBV16	TRBJ2-2	CASSPKANTGQLYF	2966	0.0387826		TRBV5	TRBJ1-1	CASGETGGSTEVF	150	0.00214209		TRBV13-2	TRBJ2-1	CASGTGAE_F	144	0.00232254		TRBV13-3	TRBJ2-7	CASSDWDNSYEQCF	147	0.00181526
TRBV13-2	TRBJ1-4	CASGGQGDERLF	2966	0.040202		TRBV12-1	TRBJ1-4	CASSSPFSNERLF	2954	0.0386257		TRBV13-3	TRBJ2-1	CASSGQSYAEQF	150	0.00214209		TRBV13-2	TRBJ1-2	CASGEDNANSDHTF	144	0.00232254		TRBV5	TRBJ1-1	CASSLNTNSNTEVF	146	0.00180291
TRBV13-1	TRBJ2-1	CASSEEGAEQYF	2966	0.040202		TRBV13-3	TRBJ2-5	CASSETEGDTQYF	2952	0.0385996		TRBV1	TRBJ2-7	CSARDWGGEQYF	149	0.00212781		TRBV13-2	TRBJ2-1	CASSADRANYAEQF	143	0.00230641		TRBV1	TRBJ2-5	CSPGLGGQDAQYF	146	0.00180291
TRBV12-1	TRBJ1-4	CASSPDRGANERLF	2966	0.040202		TRBV16	TRBJ2-5	CASSLDRNQDTQYF	2946	0.0385211		TRBV13-2	TRBJ2-5	CAGGDGGGQDTQYF	149	0.00212781		TRBV13-2	TRBJ1-2	CASSPGGNSDYTF	143	0.00230641		TRBV1	TRBJ2-4	CGADNRGQNTLYF	146	0.00180291
TRBV13-1	TRBJ2-7	CASSDMDRGGEQYF	2962	0.0401478		TRBV29	TRBJ2-7	CASEGYEQYF	2943	0.0384819		TRBV13-2	TRBJ1-1	CASGETGGDTEVF	149	0.00212781		TRBV1	TRBJ2-5	CSERGWGHQDTQYF	142	0.00229029		TRBV1	TRBJ2-2	CSVGQDTGQLYF	146	0.00180291
TRBV3	TRBJ2-1	CASSPDRGYYAEQF	2960	0.0401207		TRBV1	TRBJ1-4	CSDRGVSNERLF	2929	0.0382988		TRBV5	TRBJ2-1	CASSQVTGGKAEQF	148	0.00211353		TRBV1	TRBJ1-4	CSADANKERLF	142	0.00229029		TRBV1	TRBJ2-1	CSAPQSNYAEQF	146	0.00180291
TRBV13-2	TRBJ2-5	CASGDAGWGFNQDTQYF	2959	0.0401071		TRBV29	TRBJ1-1	CASSWGQPNTEVF	2928	0.0382857		TRBV1	TRBJ2-7	CSARGWGDEQYF	148	0.00211353		TRBV14	TRBJ2-4	CASSLTVSQDTLYF	142	0.00229029		TRBV5	TRBJ2-7	CASSPGLFYGQYF	145	0.00179056
TRBV13-1	TRBJ1-4	CASSDNNERLF	2954	0.0400394		TRBV5	TRBJ1-1	CASSQTGGTEVF	2908	0.0380242		TRBV13-2	TRBJ1-4	CASGDASNERLSF	148	0.00211353		TRBV13-2	TRBJ2-1	CASGTGVYAEQF	142	0.00229029		TRBV5	TRBJ1-1	CASSLKTNSITEVF	145	0.00179056
TRBV13-2	TRBJ2-2	CASGDATGVNTGQLYF	2950	0.0399851		TRBV31	TRBJ1-6	CAWSPPGDNSPLYF	2908	0.0380242		TRBV1	TRBJ2-2	CSAGRDSNTGQLYF	147	0.00209925		TRBV12-1	TRBJ1-3	CASSWDSSGNTLYF	142	0.00229029		TRBV1	TRBJ2-4	CSAEGLGGGQNTLYF	145	0.00179056
TRBV29	TRBJ1-5	CASSRTGDNQAPLF	2949	0.0399716		TRBV13-1	TRBJ2-5	CASSGDREGTQYF	2906	0.0379981		TRBV1	TRBJ1-1	CSPGQSDTEVF	147	0.00209925		TRBV5	TRBJ1-5	CASSQDLSYNNQTPLF	141	0.00227416		TRBV1	TRBJ2-1	CSADEGNYAEQLF	145	0.00179056
TRBV13-1	TRBJ1-1	CASSEVEVF	2946	0.0399309		TRBV5	TRBJ2-5	CASSQEGGGPQDTQYF	2892	0.037815		TRBV13-2	TRBJ2-7	CTSGERQGNEQYF	147	0.00209925		TRBV17	TRBJ2-4	CASSRGLGGQNTLYF	141	0.00227416		TRBV1	TRBJ1-1	CSAEGAKEDF	145	0.00179056
TRBV13-1	TRBJ2-7	CASSDGGSSYEQYF	2938	0.0398225		TRBV13-1	TRBJ2-4	CASSDTRKNTLYF	2884	0.0377104		TRBV13-1	TRBJ1-1	CASSDAQKDTEAF	147	0.00209925		TRBV15	TRBJ2-1	CASSQNWGVYAEQF	141	0.00227416		TRBV1	TRBJ1-1	CRVSGSVTEVF	145	0.00179056
TRBV13-1	TRBJ2-1	CASSDAELGGYAEQF	2937	0.0398089		TRBV13-1	TRBJ1-4	CASRAGTGSNERLF	2882	0.0376843		TRBV1	TRBJ2-3	CGAEGGGPSAETLYF	146	0.00208497		TRBV13-2	TRBJ2-1	CASSAGNYAEQF	141	0.00227416		TRBV1	TRBJ1-1	CRVSGGVTEAF	145	0.00179056
TRBV29	TRBJ2-2	CASSSSTINTGQLYF	2935	0.0397818		TRBV29	TRBJ1-5	CASSPDRDHQAPLF	2875	0.0375927		TRBV1	TRBJ1-1	CSPGQPNTEVF	146	0.00208497		TRBV12-1	TRBJ2-7	CASGELGTGGYEQYF	141	0.00227416		TRBV13-3	TRBJ2-7	CASSDWDNSHEQYF	145	0.00179056
TRBV13-1	TRBJ1-5	CASSRHHNNQAPLF	2930	0.039714		TRBV16	TRBJ2-1	CASSPRNYAEQF	2867	0.0374881		TRBV13-2	TRBJ1-4	CASSDASNERLF	146	0.00208497		TRBV5	TRBJ1-5	CASSQDLSYSNQAPLF	140	0.00225803		TRBV13-3	TRBJ1-1	CASSGTSTGVF	145	0.00179056
TRBV13-1	TRBJ2-7	CASSGTGDSYEQYF	2920	0.0395785		TRBV16	TRBJ2-3	CASSRQGSAETLYF	2865	0.037462		TRBV5	TRBJ1-1	CASSLDAGANTEVF	145	0.00207069		TRBV1	TRBJ1-4	CTADANNERLF	140	0.00225803		TRBV13-2	TRBJ1-2	CASGDKADYTF	145	0.00179056
TRBV13-2	TRBJ2-1	CASGDWGAHYAEQF	2907	0.0394023		TRBV13-2	TRBJ2-7	CASGDAPGSYEQYF	2863	0.0374358		TRBV1	TRBJ2-7	CSADRADEQYF	145	0.00207069		TRBV13-1	TRBJ2-5	CASGDAGGVNQDTQYF	140	0.00225803		TRBV31	TRBJ2-1	CAWSLTGGVCAEQF	144	0.00177821
TRBV5	TRBJ1-3	CASSQDPNSGNTLYF	2906	0.0393887		TRBV13-1	TRBJ2-1	CASSDAAGGNYAEQF	2862	0.0374227		TRBV1	TRBJ2-5	CSATEDTQYF	145	0.00207069		TRBV13-1	TRBJ1-1	CASGDGANTEVF	140	0.00225803		TRBV26	TRBJ2-4	CAGSPRGRQNTLYF	144	0.00177821
TRBV13-2	TRBJ1-5	CASGPDNYNNQAPLF	2897	0.0392668		TRBV29	TRBJ1-4	CASSPGTDSNERLF	2855	0.0373312		TRBV13-2	TRBJ2-7	CVSGERQGNEQYF	145	0.00207069		TRBV1	TRBJ1-6	CGAQGGYNSPLYF	139	0.0022419		TRBV1	TRBJ2-3	CSVGQGNRAETLYF	144	0.00177821
TRBV29	TRBJ2-2	CASSLSTGPNTGQLYF	2888	0.0391448		TRBV31	TRBJ2-4	CAWGESQNTLYF	2854	0.0373181		TRBV1	TRBJ2-1	CSADGLGGYAEQSF	144	0.00205641		TRBV12-2	TRBJ2-7	CASSPNWGAYEQYF	139	0.0022419		TRBV1	TRBJ2-2	CTRSAVANTGQLYF	144	0.00177821
TRBV16	TRBJ2-2	CASSSGQNTGQLYF	2884	0.0390906		TRBV13-1	TRBJ2-7	CASSDGTGGYEQYF	2852	0.037292		TRBV13-2	TRBJ1-1	CASGETRGSTEVF	144	0.00205641		TRBV1	TRBJ2-5	CTRSAVNQDTQYF	138	0.00222577		TRBV1	TRBJ2-2	CSAVANTGQPYF	144	0.00177821
TRBV13-1	TRBJ2-1	CASSDTQGAEQYF	2883	0.039077		TRBV29	TRBJ1-1	CASSWTGANTEVF	2837	0.0370959		TRBV5	TRBJ2-2	CASSLPLGGLGTGQLYF	143	0.00204213		TRBV1	TRBJ2-4	CSAEGWGYLHF	138	0.00222577		TRBV1	TRBJ2-1	CTRSADEGNYAEQF	144	0.00177821
TRBV13-2	TRBJ2-4	CASGDGGQHTLYF	2880	0.0390363		TRBV13-1	TRBJ1-5	CASSATGEDNQAPLF	2836	0.0370828		TRBV13-1	TRBJ1-2	CASGGTATNSDYTF	143	0.00204213		TRBV13-2	TRBJ1-1	CASSDYRTNTEVF	138	0.00222577		TRBV1	TRBJ1-3	CSTNSGNTLYF	144	0.00177821
TRBV5	TRBJ2-3	CASSLTNWGSAETLYF	2879	0.0390228		TRBV29	TRBJ2-4	CASSPTGRSQNTLYF	2831	0.0370174		TRBV13-1	TRBJ2-2	CASGDRDWGATGQLYF	142	0.00202785		TRBV13-1	TRBJ1-1	CASGDARRRANTEVF	138	0.00222577		TRBV13-3	TRBJ2-5	CASSDRGQDTQYF	144	0.00177821
TRBV13-1	TRBJ2-7	CASSELRDWGDEQYF	2877	0.0389957		TRBV31	TRBJ2-5	CAWRPPTGDQDTQYF	2825	0.0369389		TRBV13-1	TRBJ1-1	CASSDAQKDAEVF	142	0.00202785		TRBV12-1	TRBJ2-7	CASSSDKTYEQYF	138	0.00222577		TRBV13-2	TRBJ1-2	CASGDRADCTF	144	0.00177821
TRBV13-3	TRBJ1-4	CASNAVSNERSF	2875	0.0389686		TRBV5	TRBJ1-1	CASSPGQNTEVF	2822	0.0368997		TRBV1	TRBJ2-5	CTRSRVQDTQYF	141	0.00201357		TRBV1	TRBJ1-4	CSADAQGFNERLF	137	0.00220964		TRBV5	TRBJ2-7	CASSQGGRGQYF	143	0.00176586
TRBV5	TRBJ1-6	CASSPQGSYNSPLYF	2863	0.0388059		TRBV13-1	TRBJ2-7	CASSPRLGGLEQYF	2821	0.0368866		TRBV1	TRBJ1-6	CSADPTGNSPLYF	141	0.00201357		TRBV13-1	TRBJ2-2	CASGARENTGQLYF	137	0.00220964		TRBV5	TRBJ2-1	CASSLDRIYAEQF	143	0.00176586
TRBV13-1	TRBJ2-7	CASSDGDSSYEQYF	2862	0.0387924		TRBV5	TRBJ2-5	CASSPGLRQDTQYF	2820	0.0368736		TRBV1	TRBJ2-5	CSAGLGDQDTQYF	140	0.00199929		TRBV13-1	TRBJ1-6	CASSDAGDSPIYF	137	0.00220964		TRBV5	TRBJ1-5	CASSQDWGGDNQAPLF	143	0.00176586
TRBV13-3	TRBJ2-3	CASSRDWGAPETLYF	2861	0.0387788		TRBV29	TRBJ2-5	CASSFRVQDTQYF	2817	0.0368343		TRBV1	TRBJ2-2	CNAVRDSNTGQLYF	140	0.00199929		TRBV12-1	TRBJ2-7	CASGGYEQYF	136	0.00219351		TRBV1	TRBJ2-1	CSADEGSYAEQF	143	0.00176586
TRBV29	TRBJ2-5	CASSFDTQYF	2854	0.0386839		TRBV13-1	TRBJ1-4	CASSEGASNERLF	2814	0.0367951		TRBV13-1	TRBJ2-3	CASGDAGGARSAETLYF	140	0.00199929		TRBV13-2	TRBJ2-1	CASSDAWGGNYAEQF	135	0.00217738		TRBV13-2	TRBJ2-5	CASGEGAGQDTQYF	143	0.00176586
TRBV13-2	TRBJ2-3	CASGDLASAETLYF	2854	0.0386839		TRBV5	TRBJ2-1	CASSQGGGAYAEQF	2813	0.036782		TRBV1	TRBJ1-1	CSADIDTEVF	139	0.00198501		TRBV15	TRBJ2-1	CASSLEGTAYAEQF	133	0.00214513		TRBV13-1	TRBJ1-1	CASSSGTNTEVF	143	0.00176586
TRBV13-1	TRBJ2-1	CASSDSVYAEQF	2847	0.038589		TRBV16	TRBJ1-2	CASSPLPDYTF	2801	0.0366251		TRBV13-1	TRBJ2-7	CASSDVGYERYF	139	0.00198501		TRBV13-2	TRBJ1-2	CASSDTNSDYTF	133	0.00214513		TRBV5	TRBJ1-4	CASGPGQGANERLF	142	0.00175351
TRBV13-2	TRBJ1-2	CASGDRENSDYTF	2846	0.0385755		TRBV29	TRBJ2-2	CASSLSEVGTGQLYF	2796	0.0365597		TRBV5	TRBJ2-7	CASSRGLGVSYEQYF	138	0.00197073		TRBV12-1	TRBJ2-7	CASSPGTGVYEQYF	132	0.002129		TRBV26	TRBJ2-1	CASSGGGNYAEQF	142	0.00175351
TRBV31	TRBJ1-4	CAWSRQGERLF	2835	0.0384264		TRBV13-1	TRBJ2-3	CASSGQSGGWAETLYF	2794	0.0365336		TRBV5	TRBJ2-3	CASSPSGTGVAETLYF	138	0.00197073		TRBV1	TRBJ1-4	CSADANNERLVF	131	0.00211287		TRBV1	TRBJ2-5	CSPGLGGQGTQYF	142	0.00175351
TRBV29	TRBJ2-3	CASRGAETLYF	2834	0.0384128		TRBV5	TRBJ2-7	CASSQDLGVSYEQYF	2781	0.0363636		TRBV1	TRBJ2-5	CSAGASQGTQYF	138	0.00197073		TRBV13-2	TRBJ2-2	CASSAGTWNTGQLYF	131	0.00211287		TRBV1	TRBJ2-1	CSAGHNNHAEQF	142	0.00175351
TRBV13-2	TRBJ2-7	CASGDSEQYF	2830	0.0383586		TRBV26	TRBJ2-1	CASSLPENYAEQF	2776	0.0362982		TRBV1	TRBJ2-4	CSAGLGRQNTLYF	138	0.00197073		TRBV12-1	TRBJ2-5	CASSLGLGDYQDTQYF	130	0.00209674		TRBV1	TRBJ2-1	CGADEGNYAEQF	142	0.00175351
TRBV13-1	TRBJ2-7	CASSDDEQYF	2826	0.0383044		TRBV13-2	TRBJ2-1	CASGDGVAEQF	2766	0.0361675		TRBV13-2	TRBJ1-1	CASGQGRDTEAF	138	0.00197073		TRBV1	TRBJ2-3	CSADRAGGAETLHF	129	0.00208061		TRBV13-3	TRBJ2-7	CASSLLGQGGEQYF	142	0.00175351
TRBV16	TRBJ2-2	CASSLGANTGQLYF	2819	0.0382095		TRBV29	TRBJ1-5	CASSFRGDNQAPLF	2764	0.0361413		TRBV5	TRBJ2-7	CASGERQGNEQYF	137	0.00195645		TRBV1	TRBJ1-4	CSADDNNERLF	129	0.00208061		TRBV26	TRBJ1-2	CASSQGQANSDYTF	141	0.00174116
TRBV13-2	TRBJ2-1	CASGDDGGRAEQF	2818	0.038196		TRBV29	TRBJ1-5	CASSRQNNNQAQHF	2750	0.0359583		TRBV1	TRBJ2-1	CSADGLGGYAEQLF	137	0.00195645		TRBV26	TRBJ1-1	CASSGAGYTEVF	128	0.00206448		TRBV1	TRBJ2-5	CGADQSGGGTQYF	141	0.00174116
TRBV13-1	TRBJ1-4	CASSEAVSNERLF	2814	0.0381418		TRBV13-2	TRBJ2-3	CASGGLGGLAETLYF	2750	0.0359583		TRBV1	TRBJ1-1	CSAGDTEAF	137	0.00195645		TRBV13-2	TRBJ2-7	CASSRLGGEQYF	128	0.00206448		TRBV1	TRBJ2-4	CSAEGLGGSQNALYF	141	0.00174116
TRBV13-1	TRBJ1-1	CASSESGGDTEVF	2814	0.0381418		TRBV5	TRBJ2-1	CASSPDRVAEQF	2748	0.0359321		TRBV14	TRBJ1-1	CASSPADRVTEVF	137	0.00195645		TRBV13-2	TRBJ1-2	CASGEDNANPDYTF	128	0.00206448		TRBV1	TRBJ2-4	CSADNRGQSTLYF	141	0.00174116
TRBV16	TRBJ2-7	CASSGDWGNYEQYF	2811	0.0381011		TRBV16	TRBJ2-3	CASSLDWGNAETLYF	2735	0.0357621		TRBV1	TRBJ2-5	CSADLGGQDTQYF	136	0.00194217		TRBV13-2	TRBJ1-1	CASSDAQNTEVF	128	0.00206448		TRBV1	TRBJ2-1	CSAGTGAEQF	141	0.00174116
TRBV13-1	TRBJ2-3	CASSGPGREAETLYF	2809	0.038074		TRBV16	TRBJ2-7	CASSLGGEQYF	2730	0.0356968		TRBV1	TRBJ2-5	CGATKDTQYF	136	0.00194217		TRBV12-1	TRBJ2-7	CASSDAQ_CVASFTLQSSYEQYF	128	0.00206448		TRBV1	TRBJ1-3	CSAGHWNSGNTLYF	141	0.00174116
TRBV29	TRBJ2-5	CASSLGQGDTQYF	2808	0.0380604		TRBV13-1	TRBJ2-7	CASSDRYEQYF	2722	0.0355921		TRBV1	TRBJ2-3	CSADPEALYF	136	0.00194217		TRBV13-3	TRBJ1-4	CASSADANNERLF	127	0.00204835		TRBV16	TRBJ1-1	CASSLVGADTEVF	141	0.00174116
TRBV1	TRBJ2-5	CSGGLGEDTQYF	2807	0.0380469		TRBV16	TRBJ2-1	CASFGGDYAEQF	2717	0.0355268		TRBV1	TRBJ1-1	CTRSAAGGDTEVF	136	0.00194217		TRBV12-1	TRBJ2-7	CASSPDKTYE_YF	127	0.00204835		TRBV13-3	TRBJ2-5	CASSDRD_DTQYF	141	0.00174116
TRBV29	TRBJ2-5	CASSRDRNQDTQYF	2803	0.0379927		TRBV5	TRBJ2-7	CASSQDGWGGYEQYF	2711	0.0354483		TRBV1	TRBJ2-5	CSAGNQDAQYF	135	0.00192789		TRBV12-1	TRBJ2-7	CASSGDKTYEQYF	127	0.00204835		TRBV13-3	TRBJ2-3	CASSGTEETLYF	141	0.00174116
TRBV14	TRBJ2-4	CASSFWGTSQNTLYF	2803	0.0379927		TRBV31	TRBJ2-5	CAWSLGGNQDTQYF	2707	0.035396		TRBV1	TRBJ2-5	CSAGASRDTQYF	135	0.00192789		TRBV15	TRBJ2-1	CASSLQYAE_F	126	0.00203222		TRBV13-1	TRBJ2-1	CASGDEAGGYAEQF	141	0.00174116
TRBV16	TRBJ2-4	CASSLGGENTLYF	2800	0.037952		TRBV29	TRBJ2-7	CASRLGYEQYF	2704	0.0353568		TRBV1	TRBJ1-4	CGAPGQPLSNERLF	135	0.00192789		TRBV13-2	TRBJ2-3	CASSDGDWAETLYF	126	0.00203222		TRBV5	TRBJ2-1	CASSQNRNYAEQLF	140	0.00172882
TRBV13-2	TRBJ1-2	CASGDQGNSDYTF	2796	0.0378978		TRBV13-1	TRBJ2-7	CASSDAHRSSYEQYF	2704	0.0353568		TRBV13-2	TRBJ2-3	CASSLQGSSAETLYF	135	0.00192789		TRBV13-1	TRBJ1-6	CASSDAEDIYNSPLYF	126	0.00203222		TRBV1	TRBJ2-7	CSADRSSYEQYF	140	0.00172882
TRBV13-2	TRBJ1-1	CASGAPGQNTEVF	2793	0.0378571		TRBV13-1	TRBJ1-2	CASSDAGEGSDYTF	2703	0.0353437		TRBV13-2	TRBJ1-1	CASGQGRDAEVF	135	0.00192789		TRBV5	TRBJ1-5	CASSQDLSYNSQAPLF	125	0.0020161		TRBV1	TRBJ2-5	CSAEGQDAQYF	140	0.00172882
TRBV31	TRBJ1-1	CAWRTPGAEVF	2791	0.03783		TRBV13-2	TRBJ2-7	CASGEDWGDSSYEQYF	2696	0.0352522		TRBV1	TRBJ2-5	CSADLGDRDTQYF	134	0.0019136		TRBV1	TRBJ2-3	CSADRAGSAETLYF	125	0.0020161		TRBV1	TRBJ2-1	CSADEGNYAEQSF	140	0.00172882
TRBV16	TRBJ2-1	CASSLDGVGYAEQF	2787	0.0377758		TRBV16	TRBJ2-3	CASSLGVAETLYF	2692	0.0351999		TRBV1	TRBJ1-1	CSADINTEVLF	134	0.0019136		TRBV13-2	TRBJ2-1	CASSPQEQF	125	0.0020161		TRBV1	TRBJ1-5	CSAGAGVNQAPLF	140	0.00172882
TRBV31	TRBJ1-1	CAWSLSANTEVF	2779	0.0376674		TRBV13-1	TRBJ2-7	CASSDLGYEQYF	2690	0.0351737		TRBV13-2	TRBJ1-1	CANGETGGSTEVF	134	0.0019136		TRBV13-1	TRBJ2-7	CASSDAGDEQYF	125	0.0020161		TRBV1	TRBJ1-4	CMALSSERLF	140	0.00172882
TRBV13-2	TRBJ2-4	CASGQLGGQNTLYF	2777	0.0376402		TRBV29	TRBJ1-4	CASSLGQGATNERLF	2683	0.0350822		TRBV13-1	TRBJ1-1	CASSDAQKGTEVF	134	0.0019136		TRBV5	TRBJ1-5	CASSRDLSYNNQAPLF	124	0.00199997		TRBV13-1	TRBJ1-2	CASSDEGGADSDYTF	140	0.00172882
TRBV5	TRBJ2-7	CASSQGGEQYF	2772	0.0375725		TRBV16	TRBJ2-1	CASSPGGAEQF	2674	0.0349645		TRBV1	TRBJ1-3	CSAEGGGNTLYF	133	0.00189932		TRBV1	TRBJ2-3	CSADRAGGAGTLYF	124	0.00199997		TRBV12-1	TRBJ2-7	CASSLLGRGGEQYF	140	0.00172882
TRBV13-1	TRBJ2-7	CASSDVGAGSYEQYF	2766	0.0374911		TRBV1	TRBJ1-1	CSGGQPNTEVF	2673	0.0349514		TRBV1	TRBJ2-4	CSARLGTSQNTSYF	132	0.00188504		TRBV15	TRBJ1-2	CASSRQSNPDYTF	124	0.00199997		TRBV1	TRBJ2-7	CTRSADLGGNEQYF	139	0.00171647
TRBV13-2	TRBJ2-7	CASGDGGTGGISYEQYF	2765	0.0374776		TRBV16	TRBJ1-5	CASSQQLNNQAPLF	2669	0.0348991		TRBV1	TRBJ1-6	CSADPADNSPLYF	132	0.00188504		TRBV13-2	TRBJ1-2	CASSDWNSDYTF	124	0.00199997		TRBV1	TRBJ2-5	CSNPAGGPNQDTQYF	139	0.00171647
TRBV13-1	TRBJ2-4	CASSEGQGWTLYF	2757	0.0373692		TRBV13-1	TRBJ1-6	CASSDTSYNSPLYF	2652	0.0346768		TRBV13-2	TRBJ2-7	CASSLWTEQYF	132	0.00188504		TRBV1	TRBJ1-3	CSAVGQGAGNALYF	123	0.00198384		TRBV1	TRBJ2-5	CSAVGDQDAQYF	139	0.00171647
TRBV13-1	TRBJ1-5	CASSAGQGHQAPLF	2754	0.0373285		TRBV16	TRBJ1-1	CASSLAGKGTEVF	2645	0.0345853		TRBV1	TRBJ2-4	CSTDQGRQNTLYF	131	0.00187076		TRBV15	TRBJ2-1	CASRSTGGYNYAEQLF	123	0.00198384		TRBV1	TRBJ2-1	CGARDSNYAEQF	139	0.00171647
TRBV15	TRBJ1-6	CASRTGGFYNSPLYF	2753	0.0373149		TRBV29	TRBJ1-4	CASSLGDRNERLF	2639	0.0345069		TRBV1	TRBJ2-3	CSADPETPYF	131	0.00187076		TRBV13-1	TRBJ1-6	CASSDAGDAPLYF	123	0.00198384		TRBV19	TRBJ2-1	CASSKTGRYAEQF	139	0.00171647
TRBV13-1	TRBJ2-7	CASSDARDRGGEQYF	2751	0.0372878		TRBV13-1	TRBJ2-4	CASSSTGGKNTLYF	2611	0.0341407		TRBV1	TRBJ1-1	CTRSAGDTEVF	131	0.00187076		TRBV12-2	TRBJ2-7	CASSRDWGVEQYF	123	0.00198384		TRBV5	TRBJ1-1	CASSLKTNSKTEVF	138	0.00170412
TRBV13-1	TRBJ1-4	CASSDGRPFSNERLF	2748	0.0372472		TRBV16	TRBJ2-4	CASSLGLGGNTLYF	2596	0.0339446		TRBV1	TRBJ1-1	CTRSADINTEVF	131	0.00187076		TRBV5	TRBJ2-1	CASSPWDWGYAEQF	122	0.00196771		TRBV1	TRBJ1-6	CSAGQYDSPLYF	138	0.00170412
TRBV29	TRBJ2-1	CASSVQGTRAEQF	2745	0.0372065		TRBV5	TRBJ1-1	CASSHPQGWGTEVF	2592	0.0338923		TRBV5	TRBJ1-3	CASSQEVGNTLYF	130	0.00185648		TRBV26	TRBJ1-1	CASSGTGCTEVF	122	0.00196771		TRBV13-2	TRBJ1-2	CVSGDRADYTF	138	0.00170412
TRBV29	TRBJ2-1	CASSWDRGYAEQF	2741	0.0371523		TRBV1	TRBJ2-5	CSGGLQDTQYF	2585	0.0338008		TRBV1	TRBJ2-7	CSAHQLAYEQYF	130	0.00185648		TRBV26	TRBJ1-1	CAGSGTGYTEVF	122	0.00196771		TRBV5	TRBJ2-5	CASSQDGGVQDAQYF	137	0.00169177
TRBV13-2	TRBJ2-7	CASGEGGSSYEQYF	2739	0.0371252		TRBV13-2	TRBJ1-2	CASGEGENSDYTF	2581	0.0337485		TRBV1	TRBJ2-1	CTRSADGLGGYAEQF	130	0.00185648		TRBV1	TRBJ1-4	CSADAMYLCASSREGNERLF	122	0.00196771		TRBV1	TRBJ2-7	CTRSADRFSYEQYF	137	0.00169177
TRBV13-2	TRBJ2-3	CASGLGTAETLYF	2736	0.0370845		TRBV16	TRBJ2-7	CASSPSSYEQYF	2580	0.0337354		TRBV1	TRBJ1-1	CSAGGGDTEVSF	130	0.00185648		TRBV13-2	TRBJ2-5	CASSERTKDTQYF	122	0.00196771		TRBV1	TRBJ2-7	CSAGGQRYEQYF	137	0.00169177
TRBV29	TRBJ2-7	CASSFSYEQYF	2731	0.0370167		TRBV16	TRBJ2-3	CASSPGPSSAETLYF	2580	0.0337354		TRBV1	TRBJ1-1	CSAAQGTTEVF	130	0.00185648		TRBV13-1	TRBJ1-6	CASSDAWDSPLYF	122	0.00196771		TRBV1	TRBJ1-1	CRGTENTEVF	137	0.00169177
TRBV16	TRBJ2-7	CASSSGTGGREQYF	2723	0.0369083		TRBV29	TRBJ2-5	CASSLGNQDTQYF	2575	0.03367		TRBV13-1	TRBJ2-5	CASSDAPPGGDEQYF	130	0.00185648		TRBV12-1	TRBJ2-7	CASSEAGGHEQYF	122	0.00196771		TRBV13-2	TRBJ1-2	CASGDRPDYTF	137	0.00169177
TRBV29	TRBJ2-5	CASSPRDSQDTQYF	2721	0.0368812		TRBV19	TRBJ1-1	CASSMKGQANTEVF	2575	0.03367		TRBV13-1	TRBJ2-3	CASLRDNAETLYF	130	0.00185648		TRBV26	TRBJ1-1	CASGGTGYTEVF	121	0.00195158		TRBV5	TRBJ2-1	CASSQGLGGQGAEQF	136	0.00167942
TRBV13-1	TRBJ2-5	CASSDAGGRDTQYF	2719	0.0368541		TRBV5	TRBJ1-1	CASSLGTTNTEVF	2562	0.0335		TRBV5	TRBJ2-1	CASSLTGGYAEQF	129	0.0018422		TRBV1	TRBJ1-6	CSAQGGYNSPPYF	121	0.00195158		TRBV5	TRBJ1-1	CANMSQGRTLYCTCSARGTEVF	136	0.00167942
TRBV29	TRBJ2-4	CASSRDRGRAQNTLYF	2700	0.0365966		TRBV1	TRBJ2-4	CTRSAGLGEQNTLYF	2538	0.0331862		TRBV1	TRBJ1-4	CSGDRISNEGLF	129	0.0018422		TRBV13-2	TRBJ2-7	CASSDGQQYF	121	0.00195158		TRBV1	TRBJ2-4	CSADRGRNTLYF	136	0.00167942
TRBV13-3	TRBJ2-5	CASSGLREVNQDTQYF	2693	0.0365017		TRBV5	TRBJ1-6	CASSQEYNSPLYF	2498	0.0326632		TRBV1	TRBJ1-1	CSAGDAEVF	129	0.0018422		TRBV13-2	TRBJ2-2	CASSDLDTGQLYF	121	0.00195158		TRBV1	TRBJ1-1	CSGRGARATEVF	136	0.00167942
TRBV13-1	TRBJ2-5	CASWGGAQDTQYF	2691	0.0364746		TRBV5	TRBJ1-3	CASSQEPNSGNTLYF	2494	0.0326109		TRBV1	TRBJ2-4	CTRSARLGTSQNTLYF	128	0.00182792		TRBV13-1	TRBJ2-3	CASGGRDWAAETLYF	120	0.00193545		TRBV5	TRBJ2-5	CASSQGGGVQDTQYF	135	0.00166707
TRBV5	TRBJ2-3	CASSQVQTGGVAETLYF	2688	0.0364339		TRBV29	TRBJ1-5	CASSPGWDQAQHF	2471	0.0323101		TRBV1	TRBJ2-2	CSAVRDSNIGQLYF	128	0.00182792		TRBV12-1	TRBJ2-7	CASTLDKSYEQYF	120	0.00193545		TRBV26	TRBJ2-1	CASSRDYAEQLF	135	0.00166707
TRBV16	TRBJ2-5	CASSPRGGDTQYF	2688	0.0364339		TRBV13-2	TRBJ1-1	CASGDRGGRTEVF	2470	0.0322971		TRBV5	TRBJ1-1	CASSQGGGDTEVF	127	0.00181364		TRBV1	TRBJ2-4	CGADQDWGGWQNTLYF	119	0.00191932		TRBV1	TRBJ1-5	CSAGIGVNQAPLF	135	0.00166707
TRBV13-1	TRBJ1-4	CASGDINERLF	2687	0.0364204		TRBV16	TRBJ2-5	CASSFQEDTQYF	2467	0.0322578		TRBV31	TRBJ2-7	CTWSRGLGGREQYF	127	0.00181364		TRBV1	TRBJ2-1	CSGVAEQLF	119	0.00191932		TRBV1	TRBJ1-1	CSAEGATEAF	135	0.00166707
TRBV13-2	TRBJ1-1	CASGGRQNTEVF	2675	0.0362577		TRBV29	TRBJ2-7	CASSLRDNYEQYF	2464	0.0322186		TRBV1	TRBJ2-7	CSANRADEQHF	127	0.00181364		TRBV1	TRBJ1-4	CSADTQGFDERLF	119	0.00191932		TRBV1	TRBJ1-1	CQGTESTEVF	135	0.00166707
TRBV13-2	TRBJ1-5	CASGDANRANQAPLF	2672	0.036217		TRBV13-2	TRBJ2-4	CASGTGTGQNTLYF	2461	0.0321794		TRBV1	TRBJ2-5	CSDPGGADQDAQYF	127	0.00181364		TRBV1	TRBJ1-1	CTRSAEGGEVF	119	0.00191932		TRBV13-1	TRBJ2-7	CASSPDWGGYEQYF	135	0.00166707
TRBV29	TRBJ1-4	CASSDRISNERLF	2669	0.0361764		TRBV14	TRBJ2-1	CASSFLGTYAEQF	2455	0.0321009		TRBV1	TRBJ2-2	CSAVRDSNTGQF	127	0.00181364		TRBV17	TRBJ2-7	CASRTGVEQYF	119	0.00191932		TRBV13-1	TRBJ2-7	CASSLLGQGGEQYF	135	0.00166707
TRBV13-1	TRBJ2-7	CASSDGGYEQYF	2667	0.0361493		TRBV16	TRBJ2-3	CASSFGGWAETLYF	2448	0.0320094		TRBV1	TRBJ1-6	CGADPTDNSPLYF	127	0.00181364		TRBV15	TRBJ2-5	CASSLGTGQDTQYF	119	0.00191932		TRBV5	TRBJ2-5	CASSLNRDTQYF	134	0.00165472
TRBV29	TRBJ1-6	CASSLEGQNNSPLYF	2663	0.0360951		TRBV3	TRBJ2-1	CASSLTDYAEQF	2425	0.0317087		TRBV1	TRBJ2-7	CTRSANRADEQYF	126	0.00179936		TRBV13-2	TRBJ2-7	CASGEGTGGYERYF	119	0.00191932		TRBV5	TRBJ1-1	CGSSLKTNSNTEVF	134	0.00165472
TRBV1	TRBJ1-4	CSERDNNERLF	2661	0.0360679		TRBV29	TRBJ2-7	CASSTGNEQYF	2417	0.031604		TRBV1	TRBJ2-4	CSAAQGRQNTLYF	126	0.00179936		TRBV13-2	TRBJ1-1	CASSGTGYTEVF	119	0.00191932		TRBV26	TRBJ2-1	CASSRDYTEQF	134	0.00165472
TRBV13-1	TRBJ1-2	CASSGENSDYTF	2658	0.0360273		TRBV5	TRBJ2-3	CASSQEEGGAETLYF	2412	0.0315387		TRBV1	TRBJ2-3	CTYSAEGGGPSAETLYF	126	0.00179936		TRBV13-1	TRBJ1-6	CASSGSYNSPLYF	119	0.00191932		TRBV1	TRBJ2-7	CTRSAGGQGYEQYF	134	0.00165472
TRBV29	TRBJ2-5	CASRDWGNQDTQYF	2657	0.0360137		TRBV29	TRBJ2-1	CASSLYQINYAEQF	2411	0.0315256		TRBV1	TRBJ2-2	CTRSAGTGTGQLYF	126	0.00179936		TRBV12-2	TRBJ2-5	CASSRDWAQDTQYF	119	0.00191932		TRBV1	TRBJ2-7	CTRSADTYEQYF	134	0.00165472
TRBV29	TRBJ1-2	CASRPGQTNSDYTF	2656	0.0360002		TRBV16	TRBJ1-4	CASGRQGAPNERLF	2380	0.0311202		TRBV1	TRBJ1-1	CSAAGGDTEAF	126	0.00179936		TRBV5	TRBJ1-5	CAGSQDLSYNNQAPLF	118	0.00190319		TRBV1	TRBJ2-5	CSAVDRGLDAQYF	134	0.00165472
TRBV29	TRBJ1-1	CASSSGQSNTEVF	2655	0.0359866		TRBV16	TRBJ1-1	CASSLDRTEVF	2377	0.031081		TRBV13-1	TRBJ2-2	CASRQANTGQPYF	126	0.00179936		TRBV31	TRBJ2-4	CARSHRGQNTLYF	118	0.00190319		TRBV1	TRBJ1-1	CTRSADRNTEVF	134	0.00165472
TRBV29	TRBJ1-3	CASSFGQGATGNTLYF	2653	0.0359595		TRBV13-1	TRBJ2-7	CASSGPTGGHSYEQYF	2365	0.0309241		TRBV13-2	TRBJ1-1	CAGGQGRDTEVF	125	0.00178508		TRBV15	TRBJ2-1	CASSLQYAERF	118	0.00190319		TRBV1	TRBJ1-1	CSADGANTGVF	134	0.00165472
TRBV29	TRBJ1-2	CASSFRTGRNSDYTF	2653	0.0359595		TRBV31	TRBJ1-4	CAWRQFSNERLF	2326	0.0304142		TRBV13-1	TRBJ2-7	CASSGVGYEQYF	125	0.00178508		TRBV13-1	TRBJ2-7	CASGDYRASYEQYF	118	0.00190319		TRBV13-3	TRBJ2-5	CASSDRDQGTQYF	134	0.00165472
TRBV29	TRBJ1-3	CASSLGDRGSGNTLYF	2647	0.0358782		TRBV1	TRBJ2-7	CSADMAGDYEQYF	2325	0.0304011		TRBV13-1	TRBJ2-5	CASGEAGGADTQYF	125	0.00178508		TRBV5	TRBJ2-2	CASSQETGGSTGQLYF	117	0.00188707		TRBV13-2	TRBJ1-5	CASSGPTNNNQAPLF	134	0.00165472
TRBV29	TRBJ1-4	CASSLTGTNERLF	2646	0.0358646		TRBV16	TRBJ2-7	CASSLLGGSYEQYF	2322	0.0303619		TRBV13-1	TRBJ1-3	CASGDRGNSGNTLYF	125	0.00178508		TRBV26	TRBJ1-1	CASSGTGYTEVLF	117	0.00188707		TRBV13-2	TRBJ1-2	CASGDRAGYTF	134	0.00165472
TRBV13-2	TRBJ2-5	CASGRTVNQDTQYF	2641	0.0357969		TRBV3	TRBJ2-7	CASSSDWDSYEQYF	2311	0.030218		TRBV5	TRBJ2-1	CAGSPDWGNAEQF	124	0.0017708		TRBV15	TRBJ1-2	CASSRRSNSDYTF	117	0.00188707		TRBV1	TRBJ2-3	CSVEQGNSAETLYF	133	0.00164237
TRBV29	TRBJ1-4	CAWQGNSNERLF	2638	0.0357562		TRBV13-1	TRBJ1-2	CASSAGQGESDYTF	2295	0.0300088		TRBV1	TRBJ2-1	CSAGGLGGYAEQF	124	0.0017708		TRBV13-2	TRBJ1-2	CASSRDTSNSDYTF	117	0.00188707		TRBV1	TRBJ2-1	CSARDSDYAEQF	133	0.00164237
TRBV13-2	TRBJ1-2	CASGRRSGSNSDYTF	2635	0.0357155		TRBV16	TRBJ2-7	CASSLGTGVEQYF	2291	0.0299565		TRBV1	TRBJ1-1	CSADMNTEVF	124	0.0017708		TRBV12-1	TRBJ2-7	CASSRDKSYEQYF	117	0.00188707		TRBV1	TRBJ1-2	CTRRGPDYTF	133	0.00164237
TRBV13-2	TRBJ1-5	CASGDADNQAPLF	2634	0.035702		TRBV5	TRBJ2-4	CASSRAGGENTLYF	2258	0.029525		TRBV1	TRBJ1-1	CGAGREVF	124	0.0017708		TRBV13-2	TRBJ2-5	CASGGSGTLNQDTQYF	116	0.00187094		TRBV1	TRBJ1-1	CSADGANTEVSF	133	0.00164237
TRBV16	TRBJ2-1	CASSSLTGGAGAEQF	2628	0.0356207		TRBV29	TRBJ2-4	CASSFGTGGSQNTLYF	2258	0.029525		TRBV1	TRBJ1-1	CGAAGGDTEVF	124	0.0017708		TRBV13-1	TRBJ2-4	CASGDLDWGENTLYF	116	0.00187094		TRBV13-3	TRBJ2-7	CASSLGLGGYEQYF	133	0.00164237
TRBV29	TRBJ1-1	CASSPTANTEVF	2620	0.0355122		TRBV29	TRBJ2-4	CASRNREGQNTLYF	2258	0.029525		TRBV13-1	TRBJ2-7	CAGSDVGYEQYF	124	0.0017708		TRBV31	TRBJ2-3	CARKYGGAETLYF	115	0.00185481		TRBV1	TRBJ2-7	CSAAGGAYEQYF	132	0.00163003
TRBV5	TRBJ2-3	CASSQPGWAETLYF	2618	0.0354851		TRBV14	TRBJ2-7	CASTGYEQYF	2255	0.0294858		TRBV13-1	TRBJ1-2	CASGDAEGASDYTF	124	0.0017708		TRBV15	TRBJ2-1	CASSPQEQF	115	0.00185481		TRBV1	TRBJ2-5	CSADQSGGGTRYF	132	0.00163003
TRBV16	TRBJ2-7	CASSLGSYEQYF	2614	0.0354309		TRBV14	TRBJ2-5	CASSFKGDTQYF	2247	0.0293812		TRBV1	TRBJ2-7	CSADRGGYGQYF	123	0.00175652		TRBV13-2	TRBJ2-4	CASSKPTQNTLYF	115	0.00185481		TRBV1	TRBJ1-5	CGADRGAAPLF	132	0.00163003
TRBV13-2	TRBJ2-7	CAGDRGPFSYEQYF	2612	0.0354038		TRBV16	TRBJ1-3	CASSRTGVGNTLYF	2244	0.0293419		TRBV5	TRBJ2-1	CASSLGGGDNYAEQF	122	0.00174224		TRBV13-2	TRBJ2-3	CASGDAEGGSAETLYF	115	0.00185481		TRBV15	TRBJ1-1	CASSLNRANTEVF	132	0.00163003
TRBV16	TRBJ2-5	CASSRDGDTQYF	2611	0.0353902		TRBV5	TRBJ1-4	CASSHRQGAGERLF	2237	0.0292504		TRBV5	TRBJ1-5	CASSDSNQAPLF	122	0.00174224		TRBV13-2	TRBJ1-4	CASSSSNERLF	115	0.00185481		TRBV13-3	TRBJ1-2	CASGDRADYTF	132	0.00163003
TRBV13-1	TRBJ2-4	CASSEPDWGTSQNTLYF	2608	0.0353496		TRBV16	TRBJ1-4	CASSFLGTGSNERLF	2233	0.0291981		TRBV1	TRBJ2-7	CSAWDGSYEQYF	122	0.00174224		TRBV1	TRBJ2-4	CSADRLGVGQNTLYF	114	0.00183868		TRBV13-3	TRBJ1-1	CASSGTSAEVF	132	0.00163003
TRBV16	TRBJ1-2	CASSSGQTNSDYTF	2607	0.035336		TRBV14	TRBJ2-1	CASSFRAEQF	2231	0.029172		TRBV1	TRBJ2-7	CSARDWGYEQYF	122	0.00174224		TRBV12-1	TRBJ2-7	CASSRGKTYEQYF	114	0.00183868		TRBV5	TRBJ1-1	CASRPGQTEVF	131	0.00161768
TRBV16	TRBJ2-1	CASSLEDWGYAEQF	2605	0.0353089		TRBV16	TRBJ2-7	CASSWRNYEQYF	2229	0.0291458		TRBV1	TRBJ1-6	CSVDRDSYNSPLYF	122	0.00174224		TRBV1	TRBJ1-4	CSAEPISNERLSF	113	0.00182255		TRBV1	TRBJ2-4	CSAGDSQNALYF	131	0.00161768
TRBV13-2	TRBJ1-1	CASGGQGNTEVF	2591	0.0351191		TRBV16	TRBJ2-5	CASSLDRGQGKDTQYF	2227	0.0291197		TRBV1	TRBJ1-1	CSAAGGSTEVF	122	0.00174224		TRBV16	TRBJ2-3	CANSRLGSAETLYF	113	0.00182255		TRBV1	TRBJ2-4	CGAEGLGGSQNTLYF	131	0.00161768
TRBV16	TRBJ2-7	CASRSTGGALEQYF	2590	0.0351056		TRBV1	TRBJ1-1	CSARAANTEVF	2220	0.0290281		TRBV13-2	TRBJ1-4	CSGDRISNERLF	122	0.00174224		TRBV5	TRBJ1-5	CASSQDLSYNDQAPLF	112	0.00180642		TRBV1	TRBJ2-2	CSAAANTGQLYF	131	0.00161768
TRBV13-1	TRBJ1-1	CASSDANQGGNTEVF	2586	0.0350514		TRBV16	TRBJ2-7	CASSRDWGSYEQYF	2216	0.0289758		TRBV13-2	TRBJ1-1	CASGEIGGSTEVF	122	0.00174224		TRBV15	TRBJ2-1	CTSSPWDWGYAEQF	112	0.00180642		TRBV1	TRBJ1-5	CSTDQEAPLF	131	0.00161768
TRBV13-2	TRBJ1-1	CASGAPGHPEVF	2584	0.0350243		TRBV1	TRBJ2-4	CSAGLGEQSTLYF	2208	0.0288712		TRBV5	TRBJ2-2	CASRQANTGQLYF	121	0.00172796		TRBV13-2	TRBJ2-2	CASSDRWGANTGQLYF	112	0.00180642		TRBV1	TRBJ1-1	CRVSGGVTEVLF	131	0.00161768
TRBV13-1	TRBJ1-1	CASSEMTDTEVF	2582	0.0349972		TRBV12-1	TRBJ2-1	CASSPLQGYAEQF	2207	0.0288581		TRBV5	TRBJ2-1	CAGSPRDNYAEQF	121	0.00172796		TRBV13-2	TRBJ1-2	CASSGTANSDYTF	112	0.00180642		TRBV15	TRBJ1-1	CASSLDRANTEIF	131	0.00161768
TRBV29	TRBJ2-1	CASSFREDYAEQF	2569	0.034821		TRBV16	TRBJ2-5	CASSSQGREDTQYF	2200	0.0287666		TRBV1	TRBJ2-5	CSVGGGQDTQYF	121	0.00172796		TRBV13-2	TRBJ1-2	CASSEQGANSDYTF	112	0.00180642		TRBV3	TRBJ1-1	CASSLKTNSNTEVF	130	0.00160533
TRBV16	TRBJ2-3	CASSLDSQASAETLYF	2559	0.0346854		TRBV29	TRBJ2-2	CASSLGGGLNTGQLYF	2195	0.0287012		TRBV1	TRBJ2-4	CSADPTKTSQNTSYF	121	0.00172796		TRBV13-1	TRBJ2-1	CASGDARGNYAEQF	112	0.00180642		TRBV31	TRBJ2-1	CAWSLTGGPYAEQF	130	0.00160533
TRBV29	TRBJ1-4	CASSPGTGSNERLF	2557	0.0346583		TRBV16	TRBJ1-3	CASSLAGDSGNTLYF	2185	0.0285705		TRBV1	TRBJ1-3	CSAGDRLYGNTLYF	121	0.00172796		TRBV12-1	TRBJ2-7	CASSRDWGVEQYF	112	0.00180642		TRBV2	TRBJ1-1	CASSQDGTTNTEVF	130	0.00160533
TRBV13-1	TRBJ2-5	CASSDEGGQDTQYF	2557	0.0346583		TRBV13-1	TRBJ2-5	CASSPGGQDTQYF	2182	0.0285312		TRBV1	TRBJ1-1	CSADINAEVF	121	0.00172796		TRBV1	TRBJ2-4	CSADRLGVSQNALYF	111	0.00179029		TRBV1	TRBJ2-7	CTRSATGGAYEQYF	130	0.00160533
TRBV13-1	TRBJ2-7	CASSGGQYEQYF	2553	0.0346041		TRBV13-1	TRBJ1-4	CASSVGQGVDERLF	2182	0.0285312		TRBV13-2	TRBJ1-4	CASGDASNEK_SF	121	0.00172796		TRBV1	TRBJ1-1	CSADRRNTEVF	111	0.00179029		TRBV1	TRBJ2-1	CRPGLGDAEQF	130	0.00160533
TRBV13-2	TRBJ1-4	CASGDASGTSNERLF	2550	0.0345634		TRBV16	TRBJ2-4	CASSLPQNTLYF	2179	0.028492		TRBV1	TRBJ2-4	CSAEGEKSQNALYF	120	0.00171368		TRBV19	TRBJ1-1	CASTGTGGTEVF	111	0.00179029		TRBV1	TRBJ1-1	CSAEGATEVLF	130	0.00160533
TRBV13-2	TRBJ2-7	CASGDAGSSYEQYF	2549	0.0345499		TRBV16	TRBJ2-7	CASSALGASYEQYF	2167	0.0283351		TRBV1	TRBJ1-1	CSAEGGGTEVF	120	0.00171368		TRBV15	TRBJ2-1	CASRSTGGYNYAERF	111	0.00179029		TRBV13-1	TRBJ2-7	CASSQGGREQYF	130	0.00160533
TRBV29	TRBJ1-1	CASSLGTTNTEVF	2546	0.0345092		TRBV29	TRBJ2-4	CASSPTGGSSQNTLYF	2142	0.0280082		TRBV13-1	TRBJ2-7	CASGDVGYEQYF	120	0.00171368		TRBV15	TRBJ1-4	CASSLSHLSNERLF	111	0.00179029		TRBV5	TRBJ2-7	CASGQGGREQYF	129	0.00159298
TRBV16	TRBJ2-2	CASSSSGSGQLYF	2546	0.0345092		TRBV5	TRBJ2-7	CASSQDTGEDEQYF	2122	0.0277467		TRBV5	TRBJ2-2	CANMSQGRTLYCTCSAVRDSNTGQLYF	119	0.0016994		TRBV13-2	TRBJ2-5	CASRRGDNQDTQYF	111	0.00179029		TRBV5	TRBJ1-1	CASSPGATEVF	129	0.00159298
TRBV13-2	TRBJ2-1	CASGDAIYNYAEQF	2538	0.0344008		TRBV13-2	TRBJ2-7	CASGDPDPSSYEQYF	2117	0.0276813		TRBV5	TRBJ1-1	CASSQDGGDAEVF	119	0.0016994		TRBV13-2	TRBJ2-1	CASSDPGQNYAEQF	111	0.00179029		TRBV30	TRBJ1-4	CSSTAAFSSERLF	129	0.00159298
TRBV5	TRBJ1-3	CASSQDGGSGNTLYF	2537	0.0343872		TRBV13-3	TRBJ2-5	CASSDATKDTQYF	2106	0.0275375		TRBV1	TRBJ2-7	CSANRADERYF	119	0.0016994		TRBV13-1	TRBJ2-3	CASDDSGAETLYF	111	0.00179029		TRBV26	TRBJ2-7	CASSDWDNSYEQYF	129	0.00159298
TRBV1	TRBJ2-3	CSADMGFSAETLYF	2536	0.0343737		TRBV16	TRBJ2-1	CASMGGRDAEQF	2088	0.0273021		TRBV1	TRBJ2-5	CSADNLGQGTQYF	119	0.0016994		TRBV13-1	TRBJ1-6	CASSLAGYNSPLYF	111	0.00179029		TRBV26	TRBJ1-2	CASSQRQTNSDYTF	129	0.00159298
TRBV13-1	TRBJ2-7	CASSDDGQSSYEQYF	2536	0.0343737		TRBV13-2	TRBJ1-2	CASGHRGDSDYTF	2076	0.0271452		TRBV1	TRBJ2-1	CSAGRAEQLF	119	0.0016994		TRBV13-1	TRBJ1-3	CASSDAGQGAGNTLCF	111	0.00179029		TRBV1	TRBJ2-2	CSVGQNAGQLYF	129	0.00159298
TRBV29	TRBJ1-1	CASSFPQGNTEVF	2535	0.0343601		TRBV16	TRBJ2-2	CASSSREANTGQLYF	2070	0.0270668		TRBV5	TRBJ2-1	CASSQATNYAEQSF	118	0.00168511		TRBV13-1	TRBJ1-2	CASSSGTANSDYAF	111	0.00179029		TRBV1	TRBJ1-4	CTRMALSNERLF	129	0.00159298
TRBV13-2	TRBJ1-2	CASGGTGASDYTF	2535	0.0343601		TRBV13-2	TRBJ2-4	CASGARTGVNTLYF	2050	0.0268053		TRBV1	TRBJ2-2	CRAVRDSNTGQLYF	118	0.00168511		TRBV13-1	TRBJ1-1	CASGDARGHGTEVF	111	0.00179029		TRBV17	TRBJ2-7	CASSMTGGAYEQYF	129	0.00159298
TRBV29	TRBJ1-1	CASRREGRVDTEVF	2531	0.0343059		TRBV13-3	TRBJ2-7	CASSDASQGHEQYF	2047	0.026766		TRBV5	TRBJ2-1	CASSLLGGQGYAEQF	117	0.00167083		TRBV1	TRBJ2-1	CSGVAGQF	109	0.00175804		TRBV13-3	TRBJ2-5	CAGSDRDQDTQYF	129	0.00159298
TRBV13-2	TRBJ2-7	CASGEGGTYEQYF	2526	0.0342381		TRBV29	TRBJ1-6	CASSFYETNSPLYF	2030	0.0265437		TRBV1	TRBJ1-6	CSADRDRYNSPLYF	117	0.00167083		TRBV1	TRBJ1-1	CSTDGRNTEVF	109	0.00175804		TRBV5	TRBJ1-1	CASSRKTNSNTEVF	128	0.00158063
TRBV13-2	TRBJ2-1	CASGDARTGGLNYAEQF	2519	0.0341432		TRBV3	TRBJ2-4	CASSLAPDWGGQNTLYF	2027	0.0265045		TRBV13-2	TRBJ1-4	CASSEDRTNERLF	117	0.00167083		TRBV13-2	TRBJ2-3	CASSSPGTGGDAETLYF	109	0.00175804		TRBV5	TRBJ1-1	CASSQDKTGATEVF	128	0.00158063
TRBV13-1	TRBJ2-3	CASSDAPSAETLYF	2519	0.0341432		TRBV14	TRBJ1-3	CASSFRGPSGNTLYF	2019	0.0263999		TRBV13-2	TRBJ1-4	CASGDVSNERLF	117	0.00167083		TRBV13-2	TRBJ1-1	CASSGTGGAEVF	109	0.00175804		TRBV5	TRBJ1-1	CASSLKTNSNTDVF	128	0.00158063
TRBV29	TRBJ1-1	CASRGRGNTEVF	2518	0.0341297		TRBV1	TRBJ2-4	CSAGLGEQNALYF	1987	0.0259815		TRBV13-1	TRBJ2-7	CASSDNQGTYEQCF	117	0.00167083		TRBV13-1	TRBJ2-5	CASGDSGTLNQDTQYF	109	0.00175804		TRBV31	TRBJ2-1	CA_SLTGGVYAEQF	128	0.00158063
TRBV13-2	TRBJ2-7	CASGDSHWGGQYEQYF	2514	0.0340755		TRBV16	TRBJ1-4	CASSHRGRTERLF	1983	0.0259292		TRBV13-1	TRBJ2-2	CASGAGTTNTGQLYF	117	0.00167083		TRBV13-1	TRBJ1-1	CASSDAQNTEVF	109	0.00175804		TRBV1	TRBJ2-5	CTRSAVGDQDTQYF	128	0.00158063
TRBV13-1	TRBJ2-7	CASSDARDWGYEQYF	2509	0.0340077		TRBV29	TRBJ2-4	CASRGTGQNTLYF	1967	0.02572		TRBV13-1	TRBJ1-1	CVSSDAQKDTEVF	117	0.00167083		TRBV12-1	TRBJ2-7	CASSPDKTYEPYF	109	0.00175804		TRBV1	TRBJ2-4	CSGDNNQNTLYF	128	0.00158063
TRBV13-3	TRBJ1-1	CASSAPGRDTEVF	2502	0.0339128		TRBV29	TRBJ2-7	CASSLSRGSSYEQYF	1963	0.0256677		TRBV13-1	TRBJ2-1	CASGGPRDKYAEQF	115	0.00164227		TRBV15	TRBJ2-3	CASSRLGSAETLYF	108	0.00174191		TRBV13-3	TRBJ2-3	CASSRGTNSAETLYF	128	0.00158063
TRBV29	TRBJ1-5	CASSRQNNNQAPLF	2493	0.0337908		TRBV3	TRBJ1-2	CASSLGGNSDYTF	1944	0.0254192		TRBV5	TRBJ1-3	CASSGQGNSGNTLYF	114	0.00162799		TRBV15	TRBJ2-1	CASSAGNYAEQF	108	0.00174191		TRBV13-3	TRBJ1-1	CASSVAGEEVF	128	0.00158063
TRBV29	TRBJ1-3	CASSSGVGNTLYF	2491	0.0337637		TRBV13-2	TRBJ2-4	CASGDGGAQNTLYF	1937	0.0253277		TRBV1	TRBJ2-3	CSGQVAETLYF	114	0.00162799		TRBV13-1	TRBJ2-7	CASSEAGGHEQYF	108	0.00174191		TRBV13-2	TRBJ2-1	CASGGGQGNYAKQF	128	0.00158063
TRBV5	TRBJ2-5	CASSQGWGEDTQYF	2487	0.0337095		TRBV1	TRBJ1-1	CSAGTGEVF	1932	0.0252623		TRBV1	TRBJ1-6	CSTDRDSYNSPLYF	114	0.00162799		TRBV12-2	TRBJ1-1	CASSPGNTEVF	108	0.00174191		TRBV12-1	TRBJ2-7	CAGSLLGQGGEQYF	128	0.00158063
TRBV14	TRBJ1-5	CASSPGNNNQAPLF	2487	0.0337095		TRBV16	TRBJ2-1	CASSQGVYAEQF	1930	0.0252362		TRBV13-1	TRBJ2-5	CASGGTGGKDTQYF	114	0.00162799		TRBV29	TRBJ2-5	CASSRGDTQYF	107	0.00172578		TRBV26	TRBJ2-7	CASGPGTGGYEQYF	127	0.00156828
TRBV16	TRBJ2-3	CASSPRTGGGAETLYF	2479	0.0336011		TRBV3	TRBJ2-3	CASSLTASSAETLYF	1928	0.02521		TRBV13-1	TRBJ2-5	CASGDARGQDTQYF	114	0.00162799		TRBV13-3	TRBJ2-5	CASSWTGGHQDAQYF	107	0.00172578		TRBV26	TRBJ1-1	CASSPTGSDTEVF	127	0.00156828
TRBV16	TRBJ1-3	CASSLVDSGNTLYF	2472	0.0335062		TRBV16	TRBJ1-3	CASSLKHSGNTLYF	1917	0.0250662		TRBV13-1	TRBJ1-1	CASSDAQKDTKVF	114	0.00162799		TRBV13-2	TRBJ2-3	CASSDRGTGSSAETLYF	107	0.00172578		TRBV1	TRBJ2-7	CSAEGGGERYF	127	0.00156828
TRBV13-1	TRBJ1-2	CASSGPGQGFSDYTF	2468	0.033452		TRBV16	TRBJ1-3	CASSLGSSNSGNTLYF	1915	0.02504		TRBV5	TRBJ1-5	CASSLEQNNQAPLF	113	0.00161371		TRBV13-1	TRBJ2-3	CASSATSAETLYF	107	0.00172578		TRBV1	TRBJ2-1	CSVGHNNYAEQF	127	0.00156828
TRBV16	TRBJ1-6	CASSLDF	2466	0.0334249		TRBV16	TRBJ2-7	CASSQTGGSSYEQYF	1893	0.0247524		TRBV1	TRBJ2-5	CSAGAPQDTQYF	113	0.00161371		TRBV12-1	TRBJ2-7	CASSPDKIYEQYF	107	0.00172578		TRBV1	TRBJ1-1	CSARGTEVLF	127	0.00156828
TRBV14	TRBJ2-1	CASSLGQGSYAEQF	2466	0.0334249		TRBV3	TRBJ2-7	CASSYYWGEQYF	1889	0.0247001		TRBV1	TRBJ2-2	CSAGTSNTGQLHF	113	0.00161371		TRBV12-1	TRBJ2-7	CASSLGQGLYEQYF	107	0.00172578		TRBV15	TRBJ1-2	CASSLRANSDYTF	127	0.00156828
TRBV13-1	TRBJ2-4	CASSGWSSQNTLYF	2465	0.0334113		TRBV3	TRBJ2-3	CASSLNSAETLYF	1887	0.0246739		TRBV13-1	TRBJ2-4	CASGDESSQNTLYF	113	0.00161371		TRBV12-1	TRBJ2-7	CASALDKSYEQYF	107	0.00172578		TRBV13-3	TRBJ2-3	CASSGGTGASAETLYF	127	0.00156828
TRBV16	TRBJ1-1	CASSKTGEGTEVF	2463	0.0333842		TRBV16	TRBJ1-2	CASSSGTANSDYTF	1874	0.0245039		TRBV1	TRBJ2-7	CSADQGGGYEQYF	112	0.00159943		TRBV12-1	TRBJ2-7	CARSPDKTYEQYF	107	0.00172578		TRBV4	TRBJ1-1	CASSYWGGPTEVF	126	0.00155593
TRBV29	TRBJ2-7	CASSLYPGAGEQYF	2462	0.0333706		TRBV3	TRBJ2-7	CASSLEWDRGYEQYF	1863	0.0243601		TRBV1	TRBJ2-1	CSADGLGGYAGQF	112	0.00159943		TRBV31	TRBJ2-5	CALPSGTGGNQDTQYF	106	0.00170965		TRBV26	TRBJ1-6	CASSFGTGGAGSPLYF	126	0.00155593
TRBV16	TRBJ1-3	CASSRDRGRDSGNTLYF	2457	0.0333029		TRBV13-2	TRBJ2-4	CASGGNPNGTGSLSQNTLYF	1860	0.0243209		TRBV1	TRBJ2-1	CGADGLGGYAEQF	112	0.00159943		TRBV13-2	TRBJ2-3	CASSSGRSAETLYF	106	0.00170965		TRBV1	TRBJ2-1	CTRSASQSNYAEQF	126	0.00155593
TRBV13-1	TRBJ2-4	CASSDSGNTLYF	2457	0.0333029		TRBV29	TRBJ1-5	CASSSGTGDQAQHF	1856	0.0242686		TRBV13-1	TRBJ2-2	CASGDEGAPTGQLYF	112	0.00159943		TRBV13-1	TRBJ1-3	CASSDAGDSPLYF	106	0.00170965		TRBV1	TRBJ1-1	CSADRSTEVF	126	0.00155593
TRBV5	TRBJ2-3	CASSRDWGVAETLYF	2446	0.0331538		TRBV3	TRBJ2-7	CASSLEGVSYEQYF	1830	0.0239286		TRBV5	TRBJ1-4	CASSPPGHDERLF	111	0.00158515		TRBV12-1	TRBJ2-7	CASSPNWGAYEQYF	106	0.00170965		TRBV16	TRBJ1-1	CASSLVGTDAEVF	126	0.00155593
TRBV13-1	TRBJ2-7	CASSGSRDRGLEQYF	2446	0.0331538		TRBV16	TRBJ2-7	CASSSDKYEQYF	1824	0.0238501		TRBV1	TRBJ1-6	CSADWDSYNSPLYF	111	0.00158515		TRBV12-1	TRBJ2-7	CASSLRGISYEQYF	106	0.00170965		TRBV13-2	TRBJ2-7	CASSPDWGGYEQYF	126	0.00155593
TRBV26	TRBJ2-7	CSLSGQSYEQYF	2444	0.0331267		TRBV1	TRBJ2-4	CGAGLGEQNTLYF	1818	0.0237717		TRBV5	TRBJ1-1	CASSPGQSNTEVF	110	0.00157087		TRBV29	TRBJ1-3	CASGLGQLGNTLYF	105	0.00169352		TRBV5	TRBJ1-1	CASSLKTGVTEVF	125	0.00154359
TRBV29	TRBJ1-4	CASARAGSNERLF	2443	0.0331131		TRBV13-2	TRBJ1-4	CASGSGTGGSNERLF	1812	0.0236932		TRBV1	TRBJ2-7	CSANGADEQYF	110	0.00157087		TRBV13-2	TRBJ2-7	CASSEAGGHEQYF	105	0.00169352		TRBV26	TRBJ2-1	CASSRGYAEQF	125	0.00154359
TRBV13-2	TRBJ2-1	CASGDRDINYAEQF	2440	0.0330724		TRBV16	TRBJ1-1	CASSLDRQSNTEVF	1739	0.0227387		TRBV1	TRBJ2-4	CSAD_GRQNTLYF	110	0.00157087		TRBV13-2	TRBJ2-7	CASSDSTGGHSYEQYF	105	0.00169352		TRBV1	TRBJ2-5	CSASRDPGGDTRYF	125	0.00154359
TRBV13-1	TRBJ2-1	CASSPGGNYAEQF	2434	0.0329911		TRBV13-1	TRBJ1-2	CASSETNSDYTF	1719	0.0224772		TRBV1	TRBJ2-4	CSADGDWGGQNTLYF	110	0.00157087		TRBV12-2	TRBJ2-7	CASSLRGISYEQYF	105	0.00169352		TRBV1	TRBJ1-5	CSAVGGNQAPLF	125	0.00154359
TRBV29	TRBJ2-5	CASSFRRLNQDTQYF	2415	0.0327336		TRBV19	TRBJ2-7	CASSPGTGAYEQYF	1715	0.0224249		TRBV1	TRBJ1-6	CSAGQYNSPPYF	110	0.00157087		TRBV12-2	TRBJ2-5	CASSPGQGDTQYF	105	0.00169352		TRBV1	TRBJ1-1	CTRQGTENTEVF	125	0.00154359
TRBV29	TRBJ1-2	CASSPGQANSDYTF	2411	0.0326794		TRBV3	TRBJ2-3	CASSLSHSGSAETLYF	1711	0.0223726		TRBV1	TRBJ1-4	CSAVTVVSNERLF	110	0.00157087		TRBV12-1	TRBJ2-3	CASSLRLGISAETLYF	105	0.00169352		TRBV16	TRBJ1-6	CASRQAYNSPPYF	125	0.00154359
TRBV16	TRBJ2-5	CASSLAPDWGGQDTQYF	2409	0.0326523		TRBV12-1	TRBJ2-1	CASSLDNYAEQLF	1708	0.0223334		TRBV1	TRBJ1-1	CSPGQSNTGVF	110	0.00157087		TRBV5	TRBJ1-5	CASSQDLSYNNRAPLF	104	0.00167739		TRBV15	TRBJ1-2	CASSLRTNSDYTF	125	0.00154359
TRBV3	TRBJ2-7	CASSSGTGGIEQYF	2401	0.0325438		TRBV16	TRBJ1-2	CASSRTSNSDYTF	1705	0.0222941		TRBV1	TRBJ1-1	CSARGNTEVF	110	0.00157087		TRBV15	TRBJ2-1	CASSPWDWSYAEQF	104	0.00167739		TRBV13-2	TRBJ2-7	CAGGGQPYEQYF	125	0.00154359
TRBV16	TRBJ2-1	CASSLDRGTVNYAEQF	2396	0.0324761		TRBV13-2	TRBJ1-6	CASGDYDSPLYF	1699	0.0222157		TRBV5	TRBJ2-3	CASSPGASSAETLYF	109	0.00155659		TRBV15	TRBJ2-1	CASSDPGQNYAEQF	104	0.00167739		TRBV13-1	TRBJ1-2	CASSQGQTNSDYTF	125	0.00154359
TRBV16	TRBJ2-5	CASKQRGCTQYF	2395	0.0324625		TRBV31	TRBJ1-6	CAWSPKDVSYNSPLYF	1698	0.0222026		TRBV1	TRBJ2-7	CSARDRGDEQYF	109	0.00155659		TRBV13-2	TRBJ2-7	CASSLGQGLYEQYF	104	0.00167739		TRBV5	TRBJ1-1	CASSQEQGDTEVF	124	0.00153124
TRBV13-2	TRBJ1-1	CASGDADRGVF	2393	0.0324354		TRBV13-2	TRBJ2-3	CASGRLGASAETLYF	1694	0.0221503		TRBV1	TRBJ2-5	CSATKDTQCF	109	0.00155659		TRBV13-2	TRBJ2-4	CASGERQFSRNTLYF	104	0.00167739		TRBV1	TRBJ2-5	CSNPTGGPNQDAQYF	124	0.00153124
TRBV29	TRBJ1-1	CASSFEGGVTEVF	2372	0.0321508		TRBV1	TRBJ2-4	CSAGLGEQDTLYF	1690	0.022098		TRBV1	TRBJ1-3	CTRSAGDRFYGNTLYF	109	0.00155659		TRBV13-2	TRBJ2-1	CASSSGGALAEQF	104	0.00167739		TRBV1	TRBJ2-5	CSASRDSGGDTQYF	124	0.00153124
TRBV5	TRBJ2-5	CASSQDKPWRDTQYF	2367	0.032083		TRBV1	TRBJ2-4	CSAGLGGQNTLYF	1684	0.0220195		TRBV5	TRBJ2-7	CASSQVGDSYKQYF	108	0.00154231		TRBV13-1	TRBJ2-7	CASGELGTGGYEQYF	104	0.00167739		TRBV1	TRBJ2-5	CSADRSGGGTQYF	124	0.00153124
TRBV13-2	TRBJ1-1	CASGDQVF	2356	0.0319339		TRBV29	TRBJ1-1	CASRTANTEVF	1678	0.0219411		TRBV5	TRBJ1-1	CASSDAQKDTEVF	108	0.00154231		TRBV13-1	TRBJ2-3	CASGDASRSSAETLYF	104	0.00167739		TRBV1	TRBJ2-3	CSVGSSAEALYF	124	0.00153124
TRBV29	TRBJ2-2	CASSLRQGVGQLYF	2355	0.0319203		TRBV13-2	TRBJ2-7	CASGEGPYEQYF	1658	0.0216796		TRBV1	TRBJ2-7	CSGGQGAYERYF	108	0.00154231		TRBV12-1	TRBJ2-7	CASSLDKSYEPYF	104	0.00167739		TRBV1	TRBJ2-3	CSAPTGGGGAETPYF	124	0.00153124
TRBV3	TRBJ2-3	CASSAGLGASAETLYF	2354	0.0319068		TRBV31	TRBJ1-3	CAWRQGAPGNTLYF	1657	0.0216665		TRBV1	TRBJ1-6	CSADRDSYNSPLCF	108	0.00154231		TRBV12-1	TRBJ2-7	CASSDVGESSYEQYF	104	0.00167739		TRBV1	TRBJ1-1	CTRSADGANTEVF	124	0.00153124
TRBV29	TRBJ2-1	CASRPTGENYAEQF	2350	0.0318526		TRBV13-1	TRBJ1-1	CASSDVQSEVF	1632	0.0213396		TRBV1	TRBJ1-4	CSGGRISNERLF	108	0.00154231		TRBV12-1	TRBJ2-5	CASSRDWAQDTQYF	104	0.00167739		TRBV1	TRBJ1-1	CSADRNTEVLF	124	0.00153124
TRBV13-2	TRBJ2-1	CASGGGQGVAEQF	2346	0.0317983		TRBV3	TRBJ2-3	CASSSRLTSAETLYF	1626	0.0212611		TRBV1	TRBJ2-7	CGADWGSYEQYF	107	0.00152803		TRBV12-1	TRBJ1-4	CASSAGTGYERLLF	104	0.00167739		TRBV13-3	TRBJ2-3	CASSDARGPSAEALYF	124	0.00153124
TRBV14	TRBJ2-4	CASSLGGQNTLYF	2345	0.0317848		TRBV13-1	TRBJ2-3	CASSETGLSAETLYF	1618	0.0211565		TRBV1	TRBJ2-4	CNADGDWGSQNTLYF	107	0.00152803		TRBV29	TRBJ2-1	CASSPQGQF	103	0.00166126		TRBV13-2	TRBJ2-1	CASGDEAGGYAEQLF	124	0.00153124
TRBV13-2	TRBJ1-2	CASGDENSDYTF	2341	0.0317306		TRBV5	TRBJ2-1	CASSQDQDNYAEQF	1605	0.0209866		TRBV1	TRBJ2-1	CGAGRAEQF	107	0.00152803		TRBV1	TRBJ2-5	CGAVNQDTQYF	103	0.00166126		TRBV30	TRBJ2-5	CSSSRNNQDAQYF	123	0.00151889
TRBV13-2	TRBJ2-1	CASGDGGGRAEQF	2340	0.031717		TRBV3	TRBJ2-4	CASSSNSQNTLYF	1604	0.0209735		TRBV13-2	TRBJ1-2	CASGDARDRSDSDYTF	107	0.00152803		TRBV12-1	TRBJ2-5	CASNRGDTQYF	103	0.00166126		TRBV1	TRBJ2-7	CSAPGGYERYF	123	0.00151889
TRBV16	TRBJ2-2	CASSLEDRGTGQLYF	2339	0.0317035		TRBV29	TRBJ2-1	CASSLGGLGAGNAEQF	1581	0.0206727		TRBV13-1	TRBJ1-5	CASGDSGRNNQAPLF	107	0.00152803		TRBV29	TRBJ2-7	CASSLDWAGSYEQYF	102	0.00164513		TRBV1	TRBJ2-7	CSADRFPYEQYF	123	0.00151889
TRBV16	TRBJ2-7	CASSLNWGESSYEQYF	2325	0.0315137		TRBV5	TRBJ2-4	CASSQDGGGQNTLYF	1563	0.0204374		TRBV1	TRBJ2-5	CSADWGI_DTQYF	106	0.00151375		TRBV1	TRBJ1-1	CTRSADYTEVF	102	0.00164513		TRBV1	TRBJ2-7	CGFSGTGSYEQYF	123	0.00151889
TRBV14	TRBJ2-5	CASSFGGDQDTQYF	2322	0.031473		TRBV13-2	TRBJ2-4	CASGGGQNTLYF	1558	0.020372		TRBV1	TRBJ2-5	CSADLGDQGTQYF	106	0.00151375		TRBV1	TRBJ1-1	CSGDKSTEVF	102	0.00164513		TRBV1	TRBJ2-4	CRSQNTLYF	123	0.00151889
TRBV13-2	TRBJ2-3	CASGDAVGSAETLYF	2317	0.0314053		TRBV16	TRBJ2-4	CASSLTGMSQNTLYF	1557	0.0203589		TRBV1	TRBJ2-4	CSAEGEKGQNTLYF	106	0.00151375		TRBV15	TRBJ2-1	CASSPWDWGYAKQF	102	0.00164513		TRBV1	TRBJ1-5	CSAVGDSQAPLF	123	0.00151889
TRBV31	TRBJ1-2	CAWSRPGRNSDYTF	2308	0.0312833		TRBV14	TRBJ2-2	CASSFGASNTGQLYF	1553	0.0203066		TRBV1	TRBJ2-2	CSAGTSNAGQLYF	106	0.00151375		TRBV15	TRBJ1-1	CASSLGSTEVF	102	0.00164513		TRBV1	TRBJ1-5	CSATGISQAPLF	123	0.00151889
TRBV29	TRBJ2-1	CASGTIYAEQF	2301	0.0311884		TRBV31	TRBJ1-4	CAWSLVQISNERLF	1548	0.0202412		TRBV1	TRBJ1-1	CSAGDTEVLF	106	0.00151375		TRBV13-3	TRBJ2-5	CAGSEGDQDTQYF	102	0.00164513		TRBV1	TRBJ1-5	CSATGIDQAPLF	123	0.00151889
TRBV13-2	TRBJ2-7	CASGDAGGAYEQYF	2301	0.0311884		TRBV14	TRBJ2-5	CASSDPGQQDTQYF	1534	0.0200582		TRBV15	TRBJ1-4	CASSSDDNERLF	106	0.00151375		TRBV13-1	TRBJ1-4	CASAGTGNERLF	102	0.00164513		TRBV13-3	TRBJ2-7	CASGDWDNSYEQYF	123	0.00151889
TRBV13-1	TRBJ1-3	CASSVGNTLYF	2301	0.0311884		TRBV13-2	TRBJ1-1	CASGEDKEVF	1531	0.0200189		TRBV13-1	TRBJ1-1	CASSEGQRNTEAF	106	0.00151375		TRBV12-2	TRBJ1-3	CASSLGTGGGNTLYF	102	0.00164513		TRBV1	TRBJ2-4	CSGNNSQNTLYF	122	0.00150654
TRBV13-2	TRBJ2-2	CASGDGTGVYTGQLYF	2298	0.0311477		TRBV5	TRBJ1-4	CASSQQGTNERLF	1520	0.0198751		TRBV1	TRBJ2-5	CSATKDTRYF	105	0.00149947		TRBV12-1	TRBJ1-4	CASAGTGNERLF	102	0.00164513		TRBV1	TRBJ2-4	CSADRGQSTLYF	122	0.00150654
TRBV29	TRBJ1-4	CASSLSRGFSNERLF	2295	0.0311071		TRBV14	TRBJ2-4	CASSDRVQNTLYF	1514	0.0197967		TRBV1	TRBJ2-4	CKQTGDQTTLYF	105	0.00149947		TRBV29	TRBJ2-5	CASNRGGTQYF	101	0.00162901		TRBV1	TRBJ2-1	CSAGHNNCAEQF	122	0.00150654
TRBV1	TRBJ1-6	CSAPGHFDSYNSPLYF	2279	0.0308902		TRBV29	TRBJ2-5	CASSLSWSQDAQYF	1504	0.0196659		TRBV1	TRBJ1-6	CNADRDSYNSPLYF	105	0.00149947		TRBV1	TRBJ1-3	CSADRAGGAETLYF	101	0.00162901		TRBV1	TRBJ1-6	CSAGQRNSPPYF	122	0.00150654
TRBV29	TRBJ1-4	CASSRPGQGSNERLF	2278	0.0308767		TRBV14	TRBJ1-4	CASSPGTGGERLF	1496	0.0195613		TRBV1	TRBJ1-4	CTRSADWGRDERLF	105	0.00149947		TRBV1	TRBJ1-2	CRLRARGDSDYTF	101	0.00162901		TRBV5	TRBJ2-7	CASSQGGRERYF	121	0.00149419
TRBV5	TRBJ2-7	CASSPLGGRSEQYF	2274	0.0308224		TRBV31	TRBJ1-4	CAWSSISNERLF	1473	0.0192606		TRBV1	TRBJ1-1	CTRSAGREVF	105	0.00149947		TRBV12-1	TRBJ2-7	CASSLDKSYELYF	101	0.00162901		TRBV1	TRBJ1-3	CSINSGSTLYF	121	0.00149419
TRBV29	TRBJ1-1	CASSLGQANTEVF	2264	0.0306869		TRBV14	TRBJ2-1	CASSFWGNYAEQF	1468	0.0191952		TRBV1	TRBJ1-1	CSAAGGDTEIF	105	0.00149947		TRBV12-1	TRBJ2-2	CASSLPGYTGQLYF	101	0.00162901		TRBV13-2	TRBJ2-3	CASGDEGVGAETLYF	121	0.00149419
TRBV13-2	TRBJ1-1	CASGGPSGTTNTEVF	2257	0.030592		TRBV16	TRBJ1-1	CASSTDRGVNTEVF	1460	0.0190906		TRBV5	TRBJ2-1	CASSSWGNYAEQF	104	0.00148519		TRBV1	TRBJ2-7	CTRSAGQTGGAYEQYF	100	0.00161288		TRBV13-2	TRBJ1-2	CASGDRTDYTF	121	0.00149419
TRBV16	TRBJ1-1	CASSLVRDRRKTEVF	2251	0.0305107		TRBV13-2	TRBJ2-7	CASGDARRIYEQYF	1459	0.0190775		TRBV5	TRBJ2-1	CASSPDWGNAEQSF	104	0.00148519		TRBV1	TRBJ2-1	CSGVAEQSF	100	0.00161288		TRBV5	TRBJ2-7	CASSQGGREQHF	120	0.00148184
TRBV29	TRBJ2-5	CASSPGTGEDTQYF	2246	0.0304429		TRBV13-3	TRBJ2-7	CASSGASQGYEQYF	1448	0.0189337		TRBV30	TRBJ2-7	CSSRGRDWGDEQYF	104	0.00148519		TRBV1	TRBJ1-4	CTRSADTQGFNERLF	100	0.00161288		TRBV26	TRBJ2-1	CASSLGRIYAEQF	120	0.00148184
TRBV31	TRBJ2-2	CAWSPNTGQLYF	2238	0.0303345		TRBV16	TRBJ1-3	CASSSGQGGSGNTLYF	1391	0.0181883		TRBV1	TRBJ2-5	CTRSALGVDTQYF	104	0.00148519		TRBV13-2	TRBJ1-2	CASSPGANSDYTF	100	0.00161288		TRBV1	TRBJ1-1	CTRSAAQNTEVF	120	0.00148184
TRBV13-2	TRBJ1-1	CASGDVGANTEVF	2234	0.0302803		TRBV15	TRBJ2-1	CASREGGNYAEQF	1386	0.018123		TRBV1	TRBJ2-3	CSAEGGGPSTETLYF	104	0.00148519		TRBV13-2	TRBJ1-1	CASSDAWRGVF	100	0.00161288		TRBV1	TRBJ1-1	CSAGGANTEVF	120	0.00148184
TRBV13-1	TRBJ2-1	CASSFRYAEQF	2232	0.0302532		TRBV14	TRBJ2-1	CASSPGTGYAEQF	1386	0.018123		TRBV1	TRBJ1-3	CSAGDRFYGNTPYF	104	0.00148519		TRBV13-1	TRBJ2-7	CASSRLGGEQYF	100	0.00161288		TRBV5	TRBJ1-1	CASSQGQGDTEVLF	119	0.00146949
TRBV13-2	TRBJ2-1	CASGTGTYAEQF	2225	0.0301583		TRBV14	TRBJ2-5	CASSFGLQDTQYF	1371	0.0179268		TRBV1	TRBJ1-1	CSAGGRGTEVF	104	0.00148519		TRBV13-1	TRBJ2-4	CANSDWDRGMQNTLYF	100	0.00161288		TRBV31	TRBJ1-5	CASRDTNNQAPPF	119	0.00146949
TRBV13-1	TRBJ1-6	CASRTKYNSPLYF	2225	0.0301583		TRBV13-2	TRBJ2-1	CASGPLGGRTAEQF	1368	0.0178876		TRBV13-2	TRBJ1-6	CSADRDSYNSPLYF	104	0.00148519		TRBV4	TRBJ2-5	CASSVRDTQYF	99	0.00159675		TRBV26	TRBJ1-2	CASSQGQTNSDHTF	119	0.00146949
TRBV13-2	TRBJ2-5	CASGGTVNQDTQYF	2219	0.030077		TRBV29	TRBJ2-5	CASSSGLQDTQYF	1355	0.0177176		TRBV13-1	TRBJ1-1	CASGDAQKDTEVF	104	0.00148519		TRBV29	TRBJ1-3	CASRGQGNSGDTLYF	99	0.00159675		TRBV1	TRBJ2-5	CSLRGWDAQYF	119	0.00146949
TRBV13-1	TRBJ1-2	CASSPGHANSDYTF	2211	0.0299685		TRBV16	TRBJ2-7	CASSLGGYEQYF	1354	0.0177045		TRBV1	TRBJ2-7	CGANRADEQYF	103	0.0014709		TRBV1	TRBJ1-6	CSARGGYNSPLYF	99	0.00159675		TRBV1	TRBJ1-1	CQGTENTEVLF	119	0.00146949
TRBV16	TRBJ2-1	CASSFGTGGNYAEQF	2209	0.0299414		TRBV13-3	TRBJ2-7	CAGSDASQGYEQYF	1352	0.0176784		TRBV1	TRBJ2-3	CSAGQTSAETPYF	103	0.0014709		TRBV15	TRBJ2-7	CASSLGF	99	0.00159675		TRBV19	TRBJ1-6	CASQGDRANSPLYF	119	0.00146949
TRBV29	TRBJ1-1	CASSLTTGGANTEVF	2204	0.0298736		TRBV3	TRBJ2-3	CASSLALRWGSAETLYF	1349	0.0176392		TRBV1	TRBJ1-2	CSADRGTNSGYTF	103	0.0014709		TRBV15	TRBJ2-1	CASSPWDWGYVEQF	99	0.00159675		TRBV1	TRBJ2-5	CSAVDRGLGTQYF	118	0.00145714
TRBV29	TRBJ2-7	CASRAGTVYEQYF	2202	0.0298465		TRBV13-2	TRBJ1-1	CASGGGQNTEVF	1347	0.017613		TRBV5	TRBJ1-1	CASSQDGGDTEVLF	102	0.00145662		TRBV15	TRBJ2-1	CASSCGRESNYAEQF	99	0.00159675		TRBV1	TRBJ2-3	CSVGSSAETPYF	118	0.00145714
TRBV29	TRBJ2-5	CASRPGDQDTQYF	2199	0.0298059		TRBV13-3	TRBJ2-7	CASSDASRGYEQYF	1337	0.0174823		TRBV1	TRBJ2-5	CTRSAGGGQDTQYF	102	0.00145662		TRBV15	TRBJ2-1	CASGTGAEQF	99	0.00159675		TRBV15	TRBJ2-5	CASSLDEGADQDTQYF	118	0.00145714
TRBV13-1	TRBJ1-1	CASRTGANTEVF	2195	0.0297517		TRBV13-3	TRBJ2-7	CASSDASQGYGQYF	1325	0.0173253		TRBV1	TRBJ2-5	CSGPGGADQDTQYF	102	0.00145662		TRBV15	TRBJ1-4	CASSLSYFSNERLF	99	0.00159675		TRBV13-3	TRBJ2-7	CASSD_DNSYEQYF	118	0.00145714
TRBV13-1	TRBJ2-7	CASSDGEGSYEQYF	2194	0.0297381		TRBV14	TRBJ1-1	CASSFKGTEVF	1296	0.0169461		TRBV1	TRBJ2-2	CSAGTGTGQPYF	102	0.00145662		TRBV13-2	TRBJ2-7	CASSDAGSSYEQYF	99	0.00159675		TRBV13-3	TRBJ2-3	CASSDAQGPSAETLYF	118	0.00145714
TRBV13-2	TRBJ1-1	CASGEKNTEVF	2189	0.0296703		TRBV29	TRBJ2-5	CASSLSWSQDTQYF	1292	0.0168938		TRBV13-2	TRBJ2-7	CASGERQGNKQYF	102	0.00145662		TRBV13-2	TRBJ2-1	CAGGTGAEQF	99	0.00159675		TRBV13-2	TRBJ1-2	CASSLGTANSDYTF	118	0.00145714
TRBV13-2	TRBJ1-4	CASGDGQFSNERLF	2173	0.0294535		TRBV5	TRBJ2-1	CASSQDWDRAAEQF	1285	0.0168023		TRBV13-2	TRBJ1-1	CASGATGGSTEVF	102	0.00145662		TRBV13-2	TRBJ1-2	CASSSGTANSDYTF	99	0.00159675		TRBV5	TRBJ2-7	CASSGTGYEQYF	117	0.0014448
TRBV13-2	TRBJ2-5	CASGPTGTNQDTQYF	2169	0.0293992		TRBV14	TRBJ1-5	CASSSQGGNQAPLF	1284	0.0167892		TRBV13-1	TRBJ1-2	CASGATGGSDYTF	102	0.00145662		TRBV13-1	TRBJ2-5	CASSRTGVQDTQYF	99	0.00159675		TRBV5	TRBJ1-1	CASSQGQGGTEVF	117	0.0014448
TRBV29	TRBJ2-5	CASSLYWGNQDTQYF	2164	0.0293315		TRBV14	TRBJ2-7	CASSRTGVYEQYF	1283	0.0167762		TRBV1	TRBJ2-7	CSADRGQYERYF	101	0.00144234		TRBV13-1	TRBJ2-4	CASSDAGDSPLYF	99	0.00159675		TRBV1	TRBJ2-7	CTRSFSGTGSYEQYF	117	0.0014448
TRBV29	TRBJ2-5	CASSSSQDTQYF	2158	0.0292501		TRBV16	TRBJ1-5	CASSPTDQAPLF	1279	0.0167239		TRBV1	TRBJ2-7	CGARDWGDEQYF	101	0.00144234		TRBV13-1	TRBJ1-6	CASSDAGDSHLYF	99	0.00159675		TRBV1	TRBJ2-4	CSGDNSQNILYF	117	0.0014448
TRBV13-1	TRBJ2-7	CASSPRLVSSYEQYF	2155	0.0292095		TRBV14	TRBJ2-5	CASRHGTVQDTQYF	1277	0.0166977		TRBV1	TRBJ2-3	CSAEGGGPSAEALYF	101	0.00144234		TRBV12-1	TRBJ2-7	CASSQEGQGNEQYF	99	0.00159675		TRBV1	TRBJ2-2	CSADQGGDTGQPYF	117	0.0014448
TRBV13-1	TRBJ2-7	CASSDRGTGYEQYF	2150	0.0291417		TRBV14	TRBJ1-2	CASRRDRNSDYTF	1270	0.0166062		TRBV1	TRBJ1-1	CSAGINTEVF	101	0.00144234		TRBV1	TRBJ2-1	CTRSGVAEQF	98	0.00158062		TRBV1	TRBJ1-5	CGATGIDQAPLF	117	0.0014448
TRBV13-3	TRBJ1-4	CASSDDRQSNERLF	2147	0.029101		TRBV14	TRBJ1-1	CASSFISANTEVF	1261	0.0164885		TRBV13-2	TRBJ2-3	CASSPGTSSAETLYF	101	0.00144234		TRBV15	TRBJ2-1	CAGRSTGGYNYAEQF	98	0.00158062		TRBV16	TRBJ1-1	CAGSLVGTDTEVF	117	0.0014448
TRBV29	TRBJ1-5	CASSLGGAGNQAPLF	2144	0.0290604		TRBV3	TRBJ2-7	CASSLRQYEQYF	1256	0.0164231		TRBV13-1	TRBJ1-1	CASSDAQKDTEVSF	101	0.00144234		TRBV13-2	TRBJ2-4	CASGERRFSQNTLYF	98	0.00158062		TRBV13-2	TRBJ2-5	CASSLNRDTQYF	117	0.0014448
TRBV31	TRBJ1-1	CAWSPGGTEVF	2141	0.0290197		TRBV14	TRBJ2-7	CASSLRGPSYEQYF	1251	0.0163577		TRBV5	TRBJ2-3	CASSPGTPSAETLYF	100	0.00142806		TRBV13-1	TRBJ2-5	CASGDALGLGDNQDTQYF	98	0.00158062		TRBV13-2	TRBJ2-3	CASGPGLGNAETPYF	117	0.0014448
TRBV5	TRBJ2-7	CASSQDGTGGYEQYF	2139	0.0289926		TRBV13-2	TRBJ1-2	CASGDATENSDYTF	1249	0.0163316		TRBV1	TRBJ2-5	CSGWGGAQDTQYF	100	0.00142806		TRBV12-1	TRBJ2-7	CASSLDNSYEQYF	98	0.00158062		TRBV31	TRBJ2-1	CVWSLTGGVYAEQF	116	0.00143245
TRBV13-2	TRBJ1-2	CASGEQSNSDYTF	2136	0.0289519		TRBV14	TRBJ2-7	CASSRLGGYEQYF	1227	0.0160439		TRBV1	TRBJ2-5	CSATRDTQYF	100	0.00142806		TRBV12-1	TRBJ1-4	CASSAGTGYEGLF	98	0.00158062		TRBV26	TRBJ2-5	CASSLSRDTQYF	116	0.00143245
TRBV13-1	TRBJ1-1	CASSEDTTEVF	2136	0.0289519		TRBV5	TRBJ2-5	CASSQDWGNQDTQYF	1225	0.0160178		TRBV1	TRBJ2-4	CSANQGRQNTLYF	100	0.00142806		TRBV1	TRBJ2-5	CSAVSQDTQYF	97	0.00156449		TRBV26	TRBJ2-1	CASSRDYAERF	116	0.00143245
TRBV16	TRBJ1-2	CASSLNGNSDYTF	2124	0.0287893		TRBV5	TRBJ1-1	CASGQDGQGAQVF	1219	0.0159393		TRBV1	TRBJ2-4	CSADQGRQNILYF	100	0.00142806		TRBV1	TRBJ1-4	CSAEPTSNERLF	97	0.00156449		TRBV1	TRBJ2-7	CTRSASGGEQYF	116	0.00143245
TRBV12-1	TRBJ1-3	CASSGANSGNTLYF	2124	0.0287893		TRBV5	TRBJ2-1	CASSPRNYAEQF	1209	0.0158086		TRBV1	TRBJ2-4	CNADQGRQNTLYF	100	0.00142806		TRBV1	TRBJ1-4	CSAEPISNEGLF	97	0.00156449		TRBV1	TRBJ2-7	CSAEGGGGQYF	116	0.00143245
TRBV5	TRBJ1-1	CASSQDPGTGATEVF	2122	0.0287622		TRBV3	TRBJ2-5	CASSRDWGQDTQYF	1194	0.0156124		TRBV13-2	TRBJ2-4	CSADQGRQNTLYF	100	0.00142806		TRBV13-2	TRBJ1-4	CASGAGQTNERLF	97	0.00156449		TRBV1	TRBJ2-5	CSAGGQDTQYF	116	0.00143245
TRBV16	TRBJ2-7	CASSLESSYEQYF	2117	0.0286944		TRBV16	TRBJ2-5	CASSPGGALDTQYF	1191	0.0155732		TRBV13-2	TRBJ2-2	CASGADTGQLYF	100	0.00142806		TRBV12-1	TRBJ1-4	CASSAGTGYGRLF	97	0.00156449		TRBV1	TRBJ1-5	CSATGINRAPLF	116	0.00143245
TRBV13-3	TRBJ2-4	CASSDARQNTLYF	2110	0.0285995		TRBV14	TRBJ2-7	CASSLGTGEYEQYF	1185	0.0154947		TRBV5	TRBJ2-7	CASSQEDRGNYEQYF	99	0.00141378		TRBV12-1	TRBJ1-4	CASSAGTGYERLSF	97	0.00156449		TRBV1	TRBJ1-1	CSARGTEAF	116	0.00143245
TRBV16	TRBJ2-1	CASSLGLGVNYAEQF	2107	0.0285589		TRBV3	TRBJ2-4	CASSLELGSQNTLYF	1184	0.0154817		TRBV31	TRBJ1-3	CTWSPRQTNSGNTLYF	99	0.00141378		TRBV1	TRBJ1-1	CTRSEQGRDTEVF	96	0.00154836		TRBV1	TRBJ1-1	CSADGANTEAF	116	0.00143245
TRBV31	TRBJ1-2	CAWSLSNSDYTF	2106	0.0285453		TRBV14	TRBJ1-5	CASSDSNNQAPLF	1184	0.0154817		TRBV1	TRBJ2-4	CSADQRRQNTLYF	99	0.00141378		TRBV15	TRBJ2-1	CASSLQYAEQLF	96	0.00154836		TRBV13-3	TRBJ2-7	CASSGTGYEQYF	116	0.00143245
TRBV29	TRBJ1-1	CASGQGIEVF	2097	0.0284233		TRBV3	TRBJ2-3	CASSIQGSGAETLYF	1162	0.015194		TRBV1	TRBJ1-1	CSADINTEVSF	99	0.00141378		TRBV13-3	TRBJ1-2	CASGEDNANSDYTF	96	0.00154836		TRBV13-3	TRBJ2-1	CASSGGGNYAEQSF	116	0.00143245
TRBV29	TRBJ1-6	CASRPGYSYNSPLYF	2095	0.0283962		TRBV31	TRBJ1-1	CAWSRTPEVF	1162	0.015194		TRBV13-2	TRBJ2-7	CASGERQRNEQYF	99	0.00141378		TRBV13-2	TRBJ2-4	CASSDAPGDQNTLYF	96	0.00154836		TRBV4	TRBJ1-2	CASSSDRNSDYTF	115	0.0014201
TRBV29	TRBJ2-1	CASTTGGARAEQF	2092	0.0283556		TRBV1	TRBJ2-4	CSAGLGERNTLYF	1153	0.0150763		TRBV13-1	TRBJ2-7	CTSSDAGTGAYEQYF	99	0.00141378		TRBV12-1	TRBJ1-2	CASSAGGNSDYTF	96	0.00154836		TRBV26	TRBJ2-5	CASSLNRDAQYF	115	0.0014201
TRBV13-2	TRBJ2-1	CASGDEGNYAEQF	2090	0.0283285		TRBV14	TRBJ1-1	CASSFGKNTEVF	1152	0.0150632		TRBV13-1	TRBJ1-1	CASSEGQRNTEVSF	99	0.00141378		TRBV15	TRBJ2-7	CASSLGQNEQYF	95	0.00153223		TRBV26	TRBJ2-3	CASSDARGPSAETLYF	115	0.0014201
TRBV16	TRBJ2-3	CASSPDWGTSAETLYF	2078	0.0281658		TRBV3	TRBJ2-4	CASRGLGSQNTLYF	1146	0.0149848		TRBV5	TRBJ2-5	CASSPGPQDTQYF	98	0.0013995		TRBV15	TRBJ2-7	CASRLSYEQYF	95	0.00153223		TRBV1	TRBJ2-7	CSAARGGYF	115	0.0014201
TRBV29	TRBJ2-7	CASRSGTGSYEQYF	2071	0.0280709		TRBV1	TRBJ2-4	CSAGPGEQNTLYF	1144	0.0149586		TRBV5	TRBJ2-3	CASSSGTSSAETLYF	98	0.0013995		TRBV13-2	TRBJ2-2	CASRPGQNTGQLYF	95	0.00153223		TRBV1	TRBJ2-5	CSAVGDQGTQYF	115	0.0014201
TRBV15	TRBJ1-6	CASIGTGDYNSPLYF	2068	0.0280303		TRBV3	TRBJ2-1	CASSLVTDYAEQF	1138	0.0148802		TRBV5	TRBJ1-1	CASSEGQRNTEVF	98	0.0013995		TRBV13-1	TRBJ2-7	CASSGEGDEQYF	95	0.00153223		TRBV1	TRBJ2-3	CTRSAPTGGGGAETLYF	115	0.0014201
TRBV13-2	TRBJ1-2	CASGDEGTANSDYTF	2049	0.0277727		TRBV3	TRBJ1-1	CASSPGTGFTEVF	1134	0.0148279		TRBV30	TRBJ2-5	CSSRRGLGEDAQYF	98	0.0013995		TRBV13-1	TRBJ2-7	CASGGYEQYF	95	0.00153223		TRBV1	TRBJ2-2	CSVGQNTGQPYF	115	0.0014201
TRBV29	TRBJ2-1	CASSLSGGYAEQF	2045	0.0277185		TRBV3	TRBJ2-7	CASSQGGDEQYF	1127	0.0147364		TRBV1	TRBJ2-5	CSGTGGARDAQYF	98	0.0013995		TRBV12-2	TRBJ2-3	CASSLRLGISAETLYF	95	0.00153223		TRBV1	TRBJ1-1	CTRSGQGARATEVF	115	0.0014201
TRBV16	TRBJ1-1	CASSLAGQGAAEVF	2042	0.0276778		TRBV3	TRBJ1-1	CASSLARANTEVF	1124	0.0146971		TRBV1	TRBJ2-5	CSDWGGAQDAQYF	98	0.0013995		TRBV12-1	TRBJ2-7	CASSLDRISYEQYF	95	0.00153223		TRBV1	TRBJ1-1	CSGQGARATEVLF	115	0.0014201
TRBV16	TRBJ2-5	CASSPSTNQDTQYF	2041	0.0276643		TRBV13-3	TRBJ2-7	CASSDASQGYERYF	1115	0.0145794		TRBV1	TRBJ2-5	CSAASLGGRGTQYF	98	0.0013995		TRBV29	TRBJ2-5	CASNGGDTQYF	94	0.0015161		TRBV15	TRBJ1-1	CASRLDRANTEVF	115	0.0014201
TRBV29	TRBJ2-5	CASSSGTGVQDTQYF	2039	0.0276372		TRBV3	TRBJ2-5	CASSSDWGSQDTQYF	1112	0.0145402		TRBV1	TRBJ2-3	CSAGPETLYF	98	0.0013995		TRBV1	TRBJ2-5	CSGRDWGHQDTQYF	94	0.0015161		TRBV13-2	TRBJ2-3	CSVGQGNSAETLYF	115	0.0014201
TRBV13-2	TRBJ1-2	CASGDSGTGNSDYTF	2039	0.0276372		TRBV3	TRBJ2-4	CASSLALLSSQNTLYF	1111	0.0145271		TRBV1	TRBJ2-3	CSAGGGGPSAETLYF	98	0.0013995		TRBV16	TRBJ2-5	CASSLGQNEQYF	94	0.0015161		TRBV13-2	TRBJ2-3	CASGPGLGNAEALYF	115	0.0014201
TRBV20	TRBJ1-1	CGARVAGGEDTEVF	2037	0.0276101		TRBV3	TRBJ1-4	CASSYQGAPNERLF	1110	0.0145141		TRBV1	TRBJ1-6	CSADRDSYNSSLYF	98	0.0013995		TRBV13-3	TRBJ1-1	CASSGTGYTEVF	94	0.0015161		TRBV13-1	TRBJ2-7	CASSGQGHSYEQYF	115	0.0014201
TRBV16	TRBJ2-1	CASSLSVNYAEQF	2033	0.0275559		TRBV3	TRBJ2-1	CASSLWGANYAEQF	1106	0.0144618		TRBV1	TRBJ1-6	CSADPTDDSPLYF	98	0.0013995		TRBV13-2	TRBJ2-4	CASSDWDRGMQNTLYF	94	0.0015161		TRBV5	TRBJ2-7	CASS_GGREQYF	114	0.00140775
TRBV16	TRBJ2-7	CASSLETGGFYEQYF	2032	0.0275423		TRBV3	TRBJ1-1	CASSPGQTNTEVF	1091	0.0142656		TRBV13-3	TRBJ2-1	CASSDQSYAEQLF	98	0.0013995		TRBV13-1	TRBJ2-4	CASSAWGSSQNTLYF	94	0.0015161		TRBV26	TRBJ1-2	CASSDADRNSDYTF	114	0.00140775
TRBV13-3	TRBJ2-7	CASSGGTGGARNEQYF	2031	0.0275287		TRBV3	TRBJ2-7	CASSLRQGYEQYF	1088	0.0142264		TRBV13-3	TRBJ2-1	CASSDQPYAEQF	98	0.0013995		TRBV13-1	TRBJ1-6	CASSAAGDSPLYF	94	0.0015161		TRBV1	TRBJ2-7	CSFSGTGPYEQYF	114	0.00140775
TRBV13-2	TRBJ2-5	CASGDTGGQDTQYF	2031	0.0275287		TRBV3	TRBJ2-5	CASSFIQDTQYF	1086	0.0142002		TRBV13-2	TRBJ1-1	CASGKTGGSTEVF	98	0.0013995		TRBV12-1	TRBJ2-7	CSLDKSYEQYF	94	0.0015161		TRBV1	TRBJ2-5	CSASRDPGGDTQHF	114	0.00140775
TRBV13-2	TRBJ2-1	CASGDAGDRAEQF	2030	0.0275152		TRBV14	TRBJ2-7	CASSAGQGYEQYF	1082	0.0141479		TRBV13-1	TRBJ2-3	CASSESAETLYF	98	0.0013995		TRBV12-1	TRBJ2-7	CASSPDKTYEQDF	94	0.0015161		TRBV1	TRBJ2-5	CGLRGWDTQYF	114	0.00140775
TRBV13-2	TRBJ1-4	CASGEMGTGNERLF	2028	0.0274881		TRBV14	TRBJ2-7	CASSPLGYEQYF	1081	0.0141349		TRBV5	TRBJ1-1	CASSPADRVTEVF	97	0.00138522		TRBV12-1	TRBJ2-7	CASAPDKTYEQYF	94	0.0015161		TRBV1	TRBJ2-4	CSAEGLGGSQDTLYF	114	0.00140775
TRBV13-2	TRBJ2-1	CASGDSGGEQF	2027	0.0274745		TRBV3	TRBJ2-5	CASSVNQDTQYF	1080	0.0141218		TRBV1	TRBJ2-7	CSANRAGEQYF	97	0.00138522		TRBV12-1	TRBJ1-2	CASSLGTTNSDYAF	94	0.0015161		TRBV1	TRBJ2-2	CSAVADTGQLYF	114	0.00140775
TRBV16	TRBJ2-7	CASSSRLGTYEQYF	2022	0.0274068		TRBV3	TRBJ1-3	CASSLGRRSGNTLYF	1078	0.0140956		TRBV1	TRBJ2-5	CTRSAGASQDTQYF	97	0.00138522		TRBV1	TRBJ1-1	CSEQGRDAEVF	93	0.00149998		TRBV1	TRBJ1-6	CSAGRRNSPLYF	114	0.00140775
TRBV13-2	TRBJ2-7	CASGEGSYEQYF	2020	0.0273797		TRBV3	TRBJ2-1	CASSVGQGYAEQF	1077	0.0140826		TRBV1	TRBJ2-5	CSARKDTQYF	97	0.00138522		TRBV15	TRBJ1-4	CASSLVGTNERLF	93	0.00149998		TRBV1	TRBJ1-6	CSAGQHNSPLYF	114	0.00140775
TRBV16	TRBJ1-4	CASGVSNERLF	2018	0.0273525		TRBV14	TRBJ2-7	CASSEGSSYEQYF	1055	0.0137949		TRBV1	TRBJ1-1	CSAAGGGTEVF	97	0.00138522		TRBV13-2	TRBJ2-3	CASGDSGAETLYF	93	0.00149998		TRBV1	TRBJ1-5	CSAGTGGNQAPLF	114	0.00140775
TRBV16	TRBJ2-7	CASSLDSYEQYF	2013	0.0272848		TRBV3	TRBJ2-1	CASSWGGEAEQF	1051	0.0137426		TRBV13-3	TRBJ1-1	CASSPDRANAEVF	97	0.00138522		TRBV13-1	TRBJ2-4	CASGAGQGDTLYF	93	0.00149998		TRBV1	TRBJ1-4	CMALSNEGLF	114	0.00140775
TRBV16	TRBJ1-1	CASSSGQGNTEVF	2006	0.0271899		TRBV3	TRBJ2-1	CASRSGTGNAEQF	1048	0.0137034		TRBV13-2	TRBJ1-1	CASSQDGGDTEVF	97	0.00138522		TRBV12-1	TRBJ2-7	CASSEGTVGEQYF	93	0.00149998		TRBV13-3	TRBJ2-7	CASSDWDNSYEQHF	114	0.00140775
TRBV13-3	TRBJ1-1	CASSDGTANTEVF	2006	0.0271899		TRBV1	TRBJ1-1	CSADQGAEVF	1047	0.0136903		TRBV13-1	TRBJ2-4	CASSPTENTLYF	97	0.00138522		TRBV5	TRBJ2-7	CASSLDWAGSYEQYF	92	0.00148385		TRBV13-3	TRBJ2-3	CASGDARGPSAETLYF	114	0.00140775
TRBV13-2	TRBJ2-5	CASGDAGGEDTQYF	2003	0.0271492		TRBV13-2	TRBJ2-4	CASGDAGTGGGENTLYF	1044	0.0136511		TRBV13-3	TRBJ2-1	CAGSDQSYAEQF	96	0.00137094		TRBV29	TRBJ2-5	CASDRGDTQYF	92	0.00148385		TRBV5	TRBJ1-1	CASSQGQGDAEVF	113	0.0013954
TRBV13-2	TRBJ2-7	CASGVGTGGAHEQYF	2000	0.0271086		TRBV12-1	TRBJ2-5	CASSLTGAQDTQYF	1042	0.0136249		TRBV13-2	TRBJ2-7	CASGERQENEQYF	96	0.00137094		TRBV26	TRBJ1-1	CSLEIQSSEAGDSALYLRASSGTGYTEVF	92	0.00148385		TRBV26	TRBJ2-4	CASSPRGRQSTLYF	113	0.0013954
TRBV29	TRBJ2-1	CASSPGQNYAEQF	1996	0.0270543		TRBV3	TRBJ2-4	CASSSDRSQNTLYF	1039	0.0135857		TRBV13-2	TRBJ2-7	CANGDIWGSSYEQYF	96	0.00137094		TRBV1	TRBJ2-4	CSADRLGASQNTLYF	92	0.00148385		TRBV1	TRBJ2-7	CSATGGAYGQYF	113	0.0013954
TRBV13-3	TRBJ1-1	CASSDAGTGEVF	1994	0.0270272		TRBV3	TRBJ2-5	CASSLAGNQDTQYF	1038	0.0135726		TRBV13-2	TRBJ1-1	CARGETGGSTEVF	96	0.00137094		TRBV1	TRBJ1-4	CSADANN_RLF	92	0.00148385		TRBV1	TRBJ2-3	CSVGPSAETLYF	113	0.0013954
TRBV29	TRBJ2-3	CAAGGAETLYF	1991	0.0269866		TRBV3	TRBJ2-5	CASSSYRDQDTQYF	1037	0.0135595		TRBV13-1	TRBJ2-7	CASSDVGYGQYF	96	0.00137094		TRBV15	TRBJ2-1	CASSLGVEQF	92	0.00148385		TRBV1	TRBJ2-2	CTRSVGQNTGQLYF	113	0.0013954
TRBV13-2	TRBJ2-1	CASGDDRDRDYAEQF	1991	0.0269866		TRBV1	TRBJ2-4	CSAGLGEQNTLCF	1035	0.0135334		TRBV1	TRBJ2-7	CSANRADGQYF	95	0.00135666		TRBV13-1	TRBJ2-3	CASGDAGGGSAETLYF	92	0.00148385		TRBV1	TRBJ2-2	CTPTLGGGTGQLYF	113	0.0013954
TRBV13-2	TRBJ1-4	CASGDAGRAERLF	1978	0.0268104		TRBV3	TRBJ2-1	CASSFRGPYAEQF	1034	0.0135203		TRBV1	TRBJ2-2	CSAEGQGTGQLYF	95	0.00135666		TRBV12-1	TRBJ2-7	CASRGLGGEQYF	92	0.00148385		TRBV1	TRBJ2-2	CSVGQSTGQLYF	113	0.0013954
TRBV16	TRBJ2-1	CASSPTGAFYAEQF	1970	0.0267019		TRBV3	TRBJ1-6	CASSQGSSYNSPLYF	1033	0.0135072		TRBV1	TRBJ1-6	CSADPTDNSPLHF	95	0.00135666		TRBV1	TRBJ1-4	CSADTQGFNEGLF	91	0.00146772		TRBV1	TRBJ2-1	CSASQSNYAGQF	113	0.0013954
TRBV31	TRBJ1-2	CAWSLLDRVNSDYTF	1967	0.0266613		TRBV3	TRBJ2-1	CASSLGGSYAEQF	1012	0.0132326		TRBV1	TRBJ1-6	CSADPTDNPPLYF	95	0.00135666		TRBV1	TRBJ1-1	CSADHGGTEAF	91	0.00146772		TRBV1	TRBJ1-1	CSADGANTEVLF	113	0.0013954
TRBV26	TRBJ1-6	CASSPGLYNSPLYF	1961	0.0265799		TRBV3	TRBJ2-7	CASSPRDWGEGEQYF	1003	0.013115		TRBV1	TRBJ1-3	CSAGDRFYGDTLYF	95	0.00135666		TRBV1	TRBJ1-1	CSADANTEVF	91	0.00146772		TRBV13-1	TRBJ1-6	CASGESYNSPLYF	113	0.0013954
TRBV29	TRBJ2-4	CASSLSPENTLYF	1958	0.0265393		TRBV3	TRBJ1-2	CASSLRNSDYTF	994	0.0129973		TRBV1	TRBJ1-1	CSVAQGNTEVF	95	0.00135666		TRBV15	TRBJ2-1	CASNPWDWGYAEQF	91	0.00146772		TRBV5	TRBJ1-2	CASSQGQTNSDYTF	112	0.00138305
TRBV29	TRBJ1-4	CASSLGATNERLF	1956	0.0265122		TRBV5	TRBJ2-7	CASSDASQGYEQYF	990	0.012945		TRBV1	TRBJ1-1	CSAGTGGAEVLF	95	0.00135666		TRBV13-2	TRBJ2-7	CASSGTGGEQYF	91	0.00146772		TRBV5	TRBJ1-1	CASSQGQGDTEAF	112	0.00138305
TRBV13-1	TRBJ1-1	CASSPGTGGVF	1955	0.0264986		TRBV3	TRBJ1-1	CASSLEGRVTEVF	981	0.0128273		TRBV1	TRBJ1-1	CGADINTEVF	95	0.00135666		TRBV13-2	TRBJ2-4	CASGDAGLGGRQNTSYF	91	0.00146772		TRBV5	TRBJ1-1	CASSLKTNSNPEVF	112	0.00138305
TRBV13-1	TRBJ2-7	CASSDGASGTGGEYEQYF	1940	0.0262953		TRBV3	TRBJ2-7	CASSSGTGDYEQYF	977	0.012775		TRBV13-2	TRBJ2-2	CASSLPLGGLGTGQLYF	95	0.00135666		TRBV13-2	TRBJ2-2	CASSLLGYTGQLYF	91	0.00146772		TRBV4	TRBJ1-2	CASSRQGTNSDYTF	112	0.00138305
TRBV29	TRBJ1-2	CASSWGREGSDYTF	1933	0.0262004		TRBV3	TRBJ1-5	CASSFDYNQAPLF	977	0.012775		TRBV13-2	TRBJ1-4	CASSPPGHNERLF	95	0.00135666		TRBV12-1	TRBJ2-7	CASSLDKSYKQYF	91	0.00146772		TRBV26	TRBJ1-3	CASSWDGSGNTLYF	112	0.00138305
TRBV29	TRBJ2-7	CASSPNWGVSYEQYF	1926	0.0261055		TRBV3	TRBJ2-5	CASSPGTKDTQYF	972	0.0127096		TRBV13-2	TRBJ1-1	CASGETGGSTEIF	95	0.00135666		TRBV12-1	TRBJ2-7	CASSDTGGVEQYF	91	0.00146772		TRBV24	TRBJ2-7	CASSLYKMGGSYEQYF	112	0.00138305
TRBV29	TRBJ1-1	CASSLRGEVF	1923	0.0260649		TRBV14	TRBJ2-7	CASSFLGDYEQYF	970	0.0126835		TRBV13-2	TRBJ1-1	CASGEALRDKNTEVF	95	0.00135666		TRBV12-1	TRBJ2-5	CASGASGTKDTQYF	91	0.00146772		TRBV1	TRBJ2-7	CSFSGTGSYGQYF	112	0.00138305
TRBV3	TRBJ2-5	CASSSPGGNQDTQYF	1921	0.0260378		TRBV3	TRBJ2-2	CASSLEGATNTGQLYF	968	0.0126573		TRBV13-1	TRBJ2-7	CASSLWTEQYF	95	0.00135666		TRBV12-1	TRBJ2-5	CASAPRDWGGGDTQYF	91	0.00146772		TRBV1	TRBJ2-7	CSAEEGGEQYF	112	0.00138305
TRBV29	TRBJ1-1	CASSSTGPSNTEVF	1908	0.0258616		TRBV3	TRBJ2-4	CASSLSWGGARQNTLYF	964	0.012605		TRBV13-1	TRBJ2-5	CASSLQYQDTQYF	95	0.00135666		TRBV31	TRBJ1-4	CSADANNERLF	90	0.00145159		TRBV1	TRBJ2-7	CSADRTGGGEQYF	112	0.00138305
TRBV16	TRBJ2-3	CASSLVLGGLGAETLYF	1908	0.0258616		TRBV3	TRBJ1-1	CATSGTRNTEVF	963	0.0125919		TRBV5	TRBJ2-7	CASSPTWQYF	94	0.00134238		TRBV29	TRBJ2-1	CASSPWDWGYAEQF	90	0.00145159		TRBV1	TRBJ2-7	CSADRFSYERYF	112	0.00138305
TRBV13-2	TRBJ1-5	CASGERQGAGNQAPLF	1908	0.0258616		TRBV3	TRBJ2-1	CASSLYAEQF	960	0.0125527		TRBV31	TRBJ1-4	CAWSHISQILQDRQLGSMTEK_SF	94	0.00134238		TRBV26	TRBJ2-5	CSLEIQSSEAGDSALYLCASSLSAGGQDTQYF	90	0.00145159		TRBV1	TRBJ2-2	CSADQGGGTGQLYF	112	0.00138305
TRBV14	TRBJ2-4	CASSPQGASQNTLYF	1906	0.0258345		TRBV3	TRBJ2-3	CASSPTGGPSSAETLYF	959	0.0125396		TRBV1	TRBJ2-7	CSGGRGAYEQYF	94	0.00134238		TRBV1	TRBJ2-5	CSERDWGHQGTQYF	90	0.00145159		TRBV1	TRBJ1-4	CTRSAGQLSNERLF	112	0.00138305
TRBV13-1	TRBJ1-1	CASSDGDRNTEVF	1904	0.0258074		TRBV3	TRBJ2-1	CASSSRTGNYAEQF	958	0.0125266		TRBV1	TRBJ2-7	CSAGLGGRKQYF	94	0.00134238		TRBV1	TRBJ1-4	CSGDANNERLF	90	0.00145159		TRBV1	TRBJ1-1	CRVSGGGTEVF	112	0.00138305
TRBV29	TRBJ1-6	CASSPGTNNSPLYF	1897	0.0257125		TRBV14	TRBJ1-2	CASKAGGNSDYTF	945	0.0123566		TRBV1	TRBJ2-5	CTRSADLGDQDTQYF	94	0.00134238		TRBV15	TRBJ2-1	CASSSWDWGYAEQF	90	0.00145159		TRBV1	TRBJ1-1	CQGTENTEAF	112	0.00138305
TRBV13-2	TRBJ1-6	CASGDRGQGYNSPLYF	1895	0.0256854		TRBV1	TRBJ1-3	CSAGTASRNTLYF	941	0.0123043		TRBV1	TRBJ2-4	CSGQSQNTSYF	94	0.00134238		TRBV15	TRBJ1-4	CASSLSHSSNERLF	90	0.00145159		TRBV13-3	TRBJ2-7	CASSRTGYEQYF	112	0.00138305
TRBV14	TRBJ2-1	CASSPRGNYAEQF	1880	0.0254821		TRBV14	TRBJ2-7	CASSFLTGGDEQYF	938	0.012265		TRBV1	TRBJ2-4	CSADQERQNTLYF	94	0.00134238		TRBV15	TRBJ1-4	CASSLSHFSNERLLF	90	0.00145159		TRBV13-3	TRBJ2-7	CASSGRGHSYEQYF	112	0.00138305
TRBV3	TRBJ1-4	CASSPTGTGLNERLF	1851	0.025089		TRBV13-1	TRBJ1-2	CASSDEDNSDYTF	936	0.0122389		TRBV1	TRBJ2-4	CSADLGRQNTLHF	94	0.00134238		TRBV13-2	TRBJ2-7	CASSDVGYEQYF	90	0.00145159		TRBV13-3	TRBJ1-1	CASSDVGEVF	112	0.00138305
TRBV13-2	TRBJ1-4	CASGDPGTGVSNERLF	1848	0.0250483		TRBV3	TRBJ1-1	CASSLGSVGTEVF	931	0.0121735		TRBV1	TRBJ2-1	CSAGDWGDYAEQF	94	0.00134238		TRBV13-1	TRBJ1-4	CASGDAGQISNERLF	90	0.00145159		TRBV5	TRBJ2-7	CAGSPGLFYEQYF	111	0.0013707
TRBV13-2	TRBJ2-7	CASGEPGLGGYEQYF	1845	0.0250077		TRBV29	TRBJ1-2	CASSLRGAGSDYTF	920	0.0120297		TRBV13-1	TRBJ2-7	CASSPRDNYEQYF	94	0.00134238		TRBV13-1	TRBJ1-2	CASGDRENSDYTF	90	0.00145159		TRBV4	TRBJ2-2	CASSYPGGTTGQLYF	111	0.0013707
TRBV13-2	TRBJ1-4	CASGDSFSNERLF	1839	0.0249263		TRBV14	TRBJ1-1	CASSLGTTNTEVF	920	0.0120297		TRBV13-1	TRBJ2-4	CASGDADRNTLYF	94	0.00134238		TRBV13-1	TRBJ1-1	CASSDAGANTEVF	90	0.00145159		TRBV26	TRBJ2-5	CASSLDRDTQYF	111	0.0013707
TRBV13-1	TRBJ2-7	CASKRGDEQYF	1836	0.0248857		TRBV3	TRBJ2-7	CASSFMDWGYEQYF	919	0.0120166		TRBV5	TRBJ1-1	CASSQGLNTEAF	93	0.0013281		TRBV12-1	TRBJ1-2	CASSLGATNSDYTF	90	0.00145159		TRBV26	TRBJ2-4	CASSPRGRQNALYF	111	0.0013707
TRBV13-1	TRBJ2-7	CASSDETGSSYEQYF	1834	0.0248586		TRBV3	TRBJ2-1	CASSLIRGAEQF	919	0.0120166		TRBV1	TRBJ2-7	CSASRADEQYF	93	0.0013281		TRBV5	TRBJ2-5	CASSRDWGPQDTQYF	89	0.00143546		TRBV1	TRBJ2-7	CSADPGGNEQYF	111	0.0013707
TRBV13-2	TRBJ1-2	CASGGRTANSDYTF	1832	0.0248314		TRBV3	TRBJ2-1	CASSLGASNYAEQF	908	0.0118728		TRBV1	TRBJ1-4	CSADWGRDGRLF	93	0.0013281		TRBV5	TRBJ2-1	CASSQNRGVYAEQF	89	0.00143546		TRBV1	TRBJ2-7	CGAPGGYEQYF	111	0.0013707
TRBV29	TRBJ2-5	CASSSEQDTQYF	1819	0.0246552		TRBV1	TRBJ2-4	CSARLGEQNTLYF	907	0.0118597		TRBV13-2	TRBJ2-2	CSAVRDSNTGQLYF	93	0.0013281		TRBV3	TRBJ2-4	CASSFWGGARQNTLYF	89	0.00143546		TRBV1	TRBJ2-5	CSSPTGGPNQDTQYF	111	0.0013707
TRBV13-2	TRBJ1-4	CASGDEGLANERLF	1809	0.0245197		TRBV3	TRBJ2-1	CASSLDRGRAEQF	900	0.0117682		TRBV13-2	TRBJ1-4	CASGNASNERLF	93	0.0013281		TRBV26	TRBJ1-4	CSADANNERLF	89	0.00143546		TRBV1	TRBJ2-2	CSAVANAGQLYF	111	0.0013707
TRBV16	TRBJ2-4	CASSLELQNQNTLYF	1807	0.0244926		TRBV3	TRBJ1-5	CASSRQGNNQAPLF	898	0.011742		TRBV13-2	TRBJ1-1	CASDETGGSTEVF	93	0.0013281		TRBV1	TRBJ2-7	CSAVGGKYEQHF	89	0.00143546		TRBV1	TRBJ1-5	CSVGTGVNQAPLF	111	0.0013707
TRBV16	TRBJ2-1	CASSLGHYAEQF	1803	0.0244384		TRBV3	TRBJ2-1	CASSLTFYAEQF	897	0.0117289		TRBV13-1	TRBJ2-4	CASSDENTLYF	93	0.0013281		TRBV1	TRBJ2-5	CSAANQDTQYF	89	0.00143546		TRBV1	TRBJ1-5	CSADHEAPLF	111	0.0013707
TRBV12-1	TRBJ1-4	CASSPDRANERLF	1795	0.0243299		TRBV3	TRBJ2-4	CASSLGDRGNTLYF	895	0.0117028		TRBV13-1	TRBJ2-1	CASSRDWGETYAEQF	93	0.0013281		TRBV13-2	TRBJ2-7	CASSDVGESSYEQYF	89	0.00143546		TRBV1	TRBJ1-3	CTRSATGVGGNTLYF	111	0.0013707
TRBV13-2	TRBJ2-5	CASGRLGGQDTQYF	1793	0.0243028		TRBV14	TRBJ1-5	CASLSGTGNQAPLF	889	0.0116243		TRBV5	TRBJ2-3	CASSQDWASAEPLYF	92	0.00131382		TRBV13-2	TRBJ2-3	CASGDAGGGSAEALYF	89	0.00143546		TRBV1	TRBJ1-3	CSADHWDSGNTLYF	111	0.0013707
TRBV13-1	TRBJ2-7	CASSAPMTGGSYEQYF	1784	0.0241808		TRBV3	TRBJ2-7	CASSLVSKYEQYF	882	0.0115328		TRBV5	TRBJ2-3	CASSLQGAETLYF	92	0.00131382		TRBV13-1	TRBJ2-7	CASGDALGTYEQYF	89	0.00143546		TRBV1	TRBJ1-2	CRGPDYAF	111	0.0013707
TRBV13-2	TRBJ2-5	CASGEGQSQDTQYF	1773	0.0240317		TRBV3	TRBJ2-3	CASSWGGGAETLYF	872	0.011402		TRBV5	TRBJ2-1	CASSLGGGNNYAEQF	92	0.00131382		TRBV13-1	TRBJ2-7	CAGSDEGDEQYF	89	0.00143546		TRBV1	TRBJ1-1	CRVSGGVAEVF	111	0.0013707
TRBV13-2	TRBJ1-2	CASGDDGQGNSDYTF	1771	0.0240046		TRBV3	TRBJ2-3	CASSLGLGGPETLYF	868	0.0113497		TRBV31	TRBJ2-2	CAWSLPRGSNTGQPYF	92	0.00131382		TRBV13-1	TRBJ2-5	CASSWTGGHQDTQYF	89	0.00143546		TRBV13-2	TRBJ2-1	CASGGGQGNYAE_F	111	0.0013707
TRBV13-2	TRBJ2-3	CASGDPGSSAETLYF	1766	0.0239369		TRBV1	TRBJ2-4	CSVGLGEQNTLYF	867	0.0113367		TRBV31	TRBJ1-1	CAWSLGREVF	92	0.00131382		TRBV13-1	TRBJ1-6	CASSDGGDSPLYF	89	0.00143546		TRBV13-1	TRBJ2-7	CAGSTHERAYEQYF	111	0.0013707
TRBV3	TRBJ1-3	CASSPQSSGNTLYF	1764	0.0239098		TRBV3	TRBJ2-7	CASSFDNSYEQYF	862	0.0112713		TRBV1	TRBJ2-7	CSARD_GDEQYF	92	0.00131382		TRBV12-1	TRBJ1-4	CASSARTGYERLF	89	0.00143546		TRBV5	TRBJ1-2	CASGDRADYTF	110	0.00135835
TRBV13-3	TRBJ1-2	CASSPGTGRSDYTF	1759	0.023842		TRBV3	TRBJ2-7	CASSPTQSYEQYF	861	0.0112582		TRBV1	TRBJ2-7	CSAQDWGDEQYF	92	0.00131382		TRBV5	TRBJ1-5	CVSSQDLSYNNQAPLF	88	0.00141933		TRBV5	TRBJ1-1	CASSLMTNSNTEVF	110	0.00135835
TRBV13-2	TRBJ2-4	CASGDAGQSQNTLYF	1744	0.0236387		TRBV3	TRBJ1-2	CASSLGDRGSDYTF	860	0.0112451		TRBV1	TRBJ2-4	CSGGLGSTLYF	92	0.00131382		TRBV1	TRBJ2-4	CTRSADRLGVSQNTLYF	88	0.00141933		TRBV5	TRBJ1-1	CASSLKTNSNTEGF	110	0.00135835
TRBV13-2	TRBJ1-5	CASGDPGADQAPLF	1739	0.0235709		TRBV3	TRBJ2-7	CASNSLGDSYEQYF	854	0.0111667		TRBV1	TRBJ2-4	CSAGGEKSQNTLYF	92	0.00131382		TRBV1	TRBJ1-1	CSGGKNTEVF	88	0.00141933		TRBV31	TRBJ2-1	CAWSLTGGVYAERF	110	0.00135835
TRBV16	TRBJ2-1	CASSGTGGGAEQF	1737	0.0235438		TRBV3	TRBJ2-1	CASSLEDNYAEQF	854	0.0111667		TRBV1	TRBJ2-2	CTSSAVRDSNTGQLYF	92	0.00131382		TRBV13-3	TRBJ1-1	CASSRDGNTEVF	88	0.00141933		TRBV1	TRBJ2-7	CSAEGRGEQYF	110	0.00135835
TRBV29	TRBJ2-1	CASSFPRQGAEQF	1728	0.0234218		TRBV3	TRBJ1-1	CASSLAGNTEVF	854	0.0111667		TRBV1	TRBJ1-1	CSAGDTGVF	92	0.00131382		TRBV13-2	TRBJ2-7	CASSDAGGSEQYF	88	0.00141933		TRBV1	TRBJ2-5	CSDPTGGPNQDTQYF	110	0.00135835
TRBV16	TRBJ1-3	CASSTGTDSENTLYF	1724	0.0233676		TRBV3	TRBJ1-1	CASSGTANTEVF	850	0.0111144		TRBV13-1	TRBJ2-4	CASGGGQGAPENTLYF	92	0.00131382		TRBV13-2	TRBJ2-5	CASSEQGYQDTQYF	88	0.00141933		TRBV1	TRBJ2-4	CTRSADNRGQNTLYF	110	0.00135835
TRBV29	TRBJ1-1	CASSSPGPVTEVF	1718	0.0232863		TRBV3	TRBJ1-2	CASSPPNSDYTF	848	0.0110882		TRBV5	TRBJ2-3	CASSQGLGGSTETLYF	91	0.00129954		TRBV13-2	TRBJ1-3	CASGEDSLSGNTLYF	88	0.00141933		TRBV1	TRBJ2-3	CSAGSSAETLYF	110	0.00135835
TRBV29	TRBJ2-7	CASSLFRDEQYF	1717	0.0232727		TRBV3	TRBJ2-4	CASSLVGLGNTLYF	840	0.0109836		TRBV29	TRBJ2-7	CASSLWTVQYF	91	0.00129954		TRBV12-1	TRBJ2-7	CASHRGRVYEQYF	88	0.00141933		TRBV1	TRBJ2-2	CSADQGGDAGQLYF	110	0.00135835
TRBV13-1	TRBJ2-4	CASSDARQNTLYF	1690	0.0229067		TRBV3	TRBJ1-4	CASRGQPNERLF	839	0.0109705		TRBV1	TRBJ2-4	CSVDLGRQNTLYF	91	0.00129954		TRBV5	TRBJ2-5	CASNRGDTQYF	87	0.0014032		TRBV1	TRBJ1-5	CSADRGAGPLF	110	0.00135835
TRBV3	TRBJ1-2	CASSQKNSDYTF	1689	0.0228932		TRBV3	TRBJ2-4	CASSPRLGGRVNTLYF	837	0.0109444		TRBV1	TRBJ2-3	CSAGTGEALYF	91	0.00129954		TRBV31	TRBJ2-1	CAWSSGGSEQYF	87	0.0014032		TRBV5	TRBJ1-6	CASSPGTNSYNSPPYF	109	0.00134601
TRBV16	TRBJ2-1	CASSWGGGYAEQF	1684	0.0228254		TRBV13-3	TRBJ2-7	CASSDASQGYEQHF	834	0.0109052		TRBV1	TRBJ2-3	CSADPGTLYF	91	0.00129954		TRBV1	TRBJ2-4	CSADRLGVSQNTSYF	87	0.0014032		TRBV5	TRBJ1-6	CASSPGTNSYNSPLHF	109	0.00134601
TRBV29	TRBJ1-4	CASSSPGGGNERLF	1682	0.0227983		TRBV3	TRBJ2-7	CASSLAGLSYEQYF	833	0.0108921		TRBV1	TRBJ1-1	CSAGREAF	91	0.00129954		TRBV14	TRBJ2-3	CASSFWRNSAETLYF	87	0.0014032		TRBV5	TRBJ1-1	CASSQTGGVTEVF	109	0.00134601
TRBV13-2	TRBJ2-4	CASGDAGGENTLYF	1682	0.0227983		TRBV3	TRBJ1-1	CASSPSKEVF	824	0.0107744		TRBV13-2	TRBJ1-1	CASGDAQKDTEVF	91	0.00129954		TRBV13-1	TRBJ2-2	CASSDLDTGQLYF	87	0.0014032		TRBV31	TRBJ2-1	CAWSLTGGVYTEQF	109	0.00134601
TRBV13-2	TRBJ1-6	CASGDATGTYNSPLYF	1682	0.0227983		TRBV3	TRBJ2-7	CASSLGTRGEQYF	821	0.0107352		TRBV5	TRBJ2-3	CASGPGTSSAETLYF	90	0.00128526		TRBV13-1	TRBJ2-1	CASSCGRESNYAEQF	87	0.0014032		TRBV26	TRBJ2-1	CASSLTGAGAGLF	109	0.00134601
TRBV5	TRBJ1-2	CASSQGHNSDYTF	1679	0.0227576		TRBV3	TRBJ2-7	CASSLDGGAPEQYF	819	0.010709		TRBV31	TRBJ2-4	CSADQGRQNTLYF	90	0.00128526		TRBV13-1	TRBJ1-6	CGSSDAGDSPLYF	87	0.0014032		TRBV26	TRBJ1-2	CASSDRDRNSDYTF	109	0.00134601
TRBV16	TRBJ1-1	CASSLQGANTEVF	1673	0.0226763		TRBV14	TRBJ2-5	CASRPGGADTQYF	815	0.0106567		TRBV1	TRBJ1-6	CTYSADRDSYNSPLYF	90	0.00128526		TRBV13-1	TRBJ1-2	CASGERDKNSDYTF	87	0.0014032		TRBV1	TRBJ2-4	CTRSAGDSQNTLYF	109	0.00134601
TRBV13-2	TRBJ1-5	CASGDAVTLNNQAPLF	1670	0.0226357		TRBV13-2	TRBJ1-4	CASGDAQGMDPNERLF	811	0.0106044		TRBV1	TRBJ1-6	CSAGRYNSPLYF	90	0.00128526		TRBV12-1	TRBJ2-5	CASSPGQGDTQYF	87	0.0014032		TRBV1	TRBJ2-1	CTRSADTGAEQF	109	0.00134601
TRBV12-1	TRBJ1-3	CASSLSSGNTLCF	1668	0.0226085		TRBV3	TRBJ2-1	CASSFWGGYAEQF	808	0.0105652		TRBV1	TRBJ1-4	CSADWGRDEGLF	90	0.00128526		TRBV29	TRBJ2-5	CAGNRGDTQYF	86	0.00138707		TRBV1	TRBJ1-4	CMALSNEK_SF	109	0.00134601
TRBV5	TRBJ2-5	CASSQDEGRDTQYF	1663	0.0225408		TRBV1	TRBJ1-2	CSAPGQNSDYTF	804	0.0105129		TRBV1	TRBJ1-4	CSADRIGSNERSF	90	0.00128526		TRBV1	TRBJ2-4	CSADRLGVSQSTLYF	86	0.00138707		TRBV13-2	TRBJ2-3	CASGDERVGAETPYF	109	0.00134601
TRBV13-2	TRBJ2-4	CASGDVLASQNTLYF	1660	0.0225001		TRBV3	TRBJ2-4	CASSLALIGGGNTLYF	803	0.0104998		TRBV13-3	TRBJ1-1	CASGETGGSTEVF	90	0.00128526		TRBV13-2	TRBJ1-5	CASSQDLSYNNQAPLF	86	0.00138707		TRBV13-2	TRBJ2-1	CASSQGLGGRGAEQF	109	0.00134601
TRBV14	TRBJ2-5	CASRDSNQDTQYF	1657	0.0224594		TRBV3	TRBJ1-1	CASSVRGANTEVF	800	0.0104606		TRBV13-2	TRBJ2-7	CTCSANRADEQYF	90	0.00128526		TRBV13-1	TRBJ2-1	CASSLGANYAEQF	86	0.00138707		TRBV5	TRBJ2-4	CASSPRWGSQNTLYF	108	0.00133366
TRBV31	TRBJ2-1	CAWRSGLGGGAEQF	1652	0.0223917		TRBV3	TRBJ2-5	CASSRLGDNQDTQYF	797	0.0104214		TRBV13-2	TRBJ2-7	CASGERQGNE_YF	90	0.00128526		TRBV16	TRBJ2-1	CASSPWDWGYAEQF	85	0.00137095		TRBV4	TRBJ2-5	CASFGGADTQYF	108	0.00133366
TRBV13-2	TRBJ2-4	CASGDWGDWSQNTLYF	1652	0.0223917		TRBV3	TRBJ2-5	CASSLAGVQDTQYF	790	0.0103298		TRBV31	TRBJ1-3	CAWSLGVGNTPYF	89	0.00127098		TRBV15	TRBJ2-3	CASSLGGRAETLYF	85	0.00137095		TRBV30	TRBJ1-4	CSPTAAFSNERLF	108	0.00133366
TRBV14	TRBJ2-4	CASRHDWDQNTLYF	1646	0.0223103		TRBV3	TRBJ1-4	CASTGRLSNERLF	789	0.0103168		TRBV1	TRBJ1-5	CSAPGTDNNQAPLF	89	0.00127098		TRBV15	TRBJ2-1	CASSFRDWGYAEQLF	85	0.00137095		TRBV26	TRBJ2-7	CASSPGTGGYERYF	108	0.00133366
TRBV14	TRBJ1-2	CASSLGGVANSDYTF	1635	0.0221613		TRBV13-1	TRBJ2-5	CASSGRGPNQDTQYF	786	0.0102775		TRBV1	TRBJ1-1	CSADINTEAF	89	0.00127098		TRBV13-3	TRBJ2-5	CASSQDWGPQDTQYF	85	0.00137095		TRBV1	TRBJ2-7	CSADTYGQYF	108	0.00133366
TRBV13-2	TRBJ1-2	CASGGPGQGPDYTF	1635	0.0221613		TRBV3	TRBJ2-7	CASSLAPDYEQYF	783	0.0102383		TRBV31	TRBJ1-5	CAWSPGGMNQAPLF	88	0.0012567		TRBV13-3	TRBJ2-1	CASSAGDYAEQF	85	0.00137095		TRBV1	TRBJ2-5	CGNPTGGPNQDTQYF	108	0.00133366
TRBV13-1	TRBJ1-2	CASSDGTANSDYTF	1629	0.0220799		TRBV3	TRBJ1-2	CASSFDSANSDYTF	771	0.0100814		TRBV1	TRBJ1-3	CSATNSGNTLHF	88	0.0012567		TRBV13-1	TRBJ2-7	CASSDVGESSYEQYF	85	0.00137095		TRBV1	TRBJ2-1	CSARDPNYAEQF	108	0.00133366
TRBV16	TRBJ1-1	CASSSFRDTEVF	1628	0.0220664		TRBV3	TRBJ1-6	CASSPPGHYNSPLYF	760	0.00993756		TRBV1	TRBJ1-3	CSAGDRFYGSTLYF	88	0.0012567		TRBV13-1	TRBJ2-5	CASSEGDQDTQYF	85	0.00137095		TRBV1	TRBJ1-6	CGAGQYNSPLYF	108	0.00133366
TRBV13-1	TRBJ2-7	CASSEEGDYEQYF	1627	0.0220528		TRBV13-1	TRBJ2-7	CASSDASQGYEQYF	750	0.0098068		TRBV1	TRBJ1-1	CSAAGGDAEVF	88	0.0012567		TRBV13-1	TRBJ1-2	CASGDGTGENSDYTF	85	0.00137095		TRBV13-3	TRBJ2-7	CVSSDWDNSYEQYF	108	0.00133366
TRBV16	TRBJ2-7	CASSSGGEQYF	1625	0.0220257		TRBV3	TRBJ2-1	CASSLDWGLYAEQF	743	0.00971527		TRBV13-2	TRBJ1-4	CANGDASNERLF	88	0.0012567		TRBV12-1	TRBJ2-7	CASSQGGREQYF	85	0.00137095		TRBV13-2	TRBJ2-1	CASGGGQGNYAERF	108	0.00133366
TRBV14	TRBJ2-1	CASSFRGRAEQF	1624	0.0220122		TRBV3	TRBJ2-5	CASSQPGNQDTQYF	736	0.00962374		TRBV13-2	TRBJ1-1	CASGETGGSIEVF	88	0.0012567		TRBV1	TRBJ1-4	CSAEPISDERLF	84	0.00135482		TRBV13-2	TRBJ1-3	CASGAWVGRGDTLYF	108	0.00133366
TRBV13-1	TRBJ1-2	CASSDDRGHSDYTF	1618	0.0219308		TRBV3	TRBJ2-1	CASSLLGAYAEQF	734	0.00959759		TRBV13-2	TRBJ1-1	CASGETGGAEVF	88	0.0012567		TRBV13-1	TRBJ1-1	CASGEPTNTEVF	84	0.00135482		TRBV13-2	TRBJ1-1	CASGVPGQGPDTEVF	108	0.00133366
TRBV13-2	TRBJ2-7	CASGDGGKEQYF	1606	0.0217682		TRBV3	TRBJ1-2	CASSLRGGANSDYTF	734	0.00959759		TRBV13-1	TRBJ2-7	CASGPRDRGSYEQYF	88	0.0012567		TRBV12-1	TRBJ1-2	CASPPGGNSDYTF	84	0.00135482		TRBV12-1	TRBJ2-7	CASSLLGQGGGQYF	108	0.00133366
TRBV13-1	TRBJ2-7	CAIRDWGNEQYF	1604	0.0217411		TRBV3	TRBJ2-1	CASSLARTGGGAEQF	727	0.00950606		TRBV13-1	TRBJ1-1	CASSGGQRNTEVF	88	0.0012567		TRBV5	TRBJ1-5	CASSQDLSHNNQAPLF	83	0.00133869		TRBV5	TRBJ2-1	CASSPGLGGRGAEQF	107	0.00132131
TRBV3	TRBJ2-3	CASSLTGTSAETLYF	1597	0.0216462		TRBV3	TRBJ2-3	CASSLPGLGSAETLYF	724	0.00946683		TRBV5	TRBJ2-7	CASSQGLGVSYGQYF	87	0.00124241		TRBV1	TRBJ2-7	CSAVGGKYERYF	83	0.00133869		TRBV2	TRBJ2-1	CASSQGTGGNYAEQF	107	0.00132131
TRBV29	TRBJ2-5	CASSGQEDTQYF	1593	0.021592		TRBV13-2	TRBJ2-4	CASGEGQNTLYF	724	0.00946683		TRBV1	TRBJ2-3	CTRSAEGGGPSAETLYF	87	0.00124241		TRBV1	TRBJ1-1	CSAEGGEVLF	83	0.00133869		TRBV26	TRBJ1-5	CASRDTNNQAPLF	107	0.00132131
TRBV13-1	TRBJ1-1	CASRGQSNTEVF	1583	0.0214564		TRBV13-3	TRBJ2-7	CASSDASQGYEQCF	719	0.00940145		TRBV1	TRBJ2-3	CGADPETLYF	87	0.00124241		TRBV16	TRBJ2-7	CASSLEAVPSYEQYF	83	0.00133869		TRBV26	TRBJ1-2	CSLEIQSSEAGDSALYLRASSQGQTNSDYTF	107	0.00132131
TRBV13-2	TRBJ2-7	CASGDPLWVSYEQYF	1578	0.0213887		TRBV1	TRBJ2-4	CSTGLGEQNTLYF	716	0.00936222		TRBV1	TRBJ1-6	CSAVRDSYNSPLYF	87	0.00124241		TRBV15	TRBJ2-1	CASSFRDWGYAEQSF	83	0.00133869		TRBV1	TRBJ2-5	CTRSPGLGGQDTQYF	107	0.00132131
TRBV29	TRBJ1-5	CASSLPGTGDQAPLF	1576	0.0213615		TRBV3	TRBJ2-7	CASSLAGLGGPYEQYF	715	0.00934915		TRBV1	TRBJ1-1	CSVGQGNTEAF	87	0.00124241		TRBV13-2	TRBJ2-7	CASRGLGGEQYF	83	0.00133869		TRBV1	TRBJ2-5	CSLGGWDTQYF	107	0.00132131
TRBV13-1	TRBJ1-6	CASSDRGF	1572	0.0213073		TRBV3	TRBJ2-7	CASSLERDTSYEQYF	709	0.00927069		TRBV13-2	TRBJ2-3	CASGDQLGGSAETPYF	87	0.00124241		TRBV13-2	TRBJ2-5	CASSYPGHQDTQYF	83	0.00133869		TRBV1	TRBJ2-1	CSADEGDYAEQF	107	0.00132131
TRBV14	TRBJ2-7	CASSLREGEQYF	1570	0.0212802		TRBV1	TRBJ2-7	CSPGQVIYEQYF	700	0.00915301		TRBV13-2	TRBJ1-4	CASGDAFGGTSNERLF	87	0.00124241		TRBV13-2	TRBJ2-5	CASSPPGQGDTQYF	83	0.00133869		TRBV1	TRBJ1-1	CSAGGATEVF	107	0.00132131
TRBV13-1	TRBJ2-7	CASSEQASYEQYF	1564	0.0211989		TRBV3	TRBJ1-4	CASSQGASNERLF	694	0.00907456		TRBV13-2	TRBJ1-1	CTCSPGQSNTEVF	87	0.00124241		TRBV13-1	TRBJ1-1	CASSDYRTNTEVF	83	0.00133869		TRBV1	TRBJ1-1	CSADRNAEVF	107	0.00132131
TRBV13-2	TRBJ2-7	CASGDTEQYF	1562	0.0211718		TRBV1	TRBJ2-7	CSADRLGAGYF	693	0.00906148		TRBV13-2	TRBJ1-1	CTCSAAQGNTEVF	87	0.00124241		TRBV26	TRBJ2-7	CASRDWGYEQCF	82	0.00132256		TRBV13-2	TRBJ1-2	CANGDRADYTF	107	0.00132131
TRBV29	TRBJ1-1	CASTWDRTNTEVF	1561	0.0211582		TRBV1	TRBJ2-4	CSAGLREQNTLYF	691	0.00903533		TRBV13-1	TRBJ1-5	CASSSGTGDNQAPLF	87	0.00124241		TRBV1	TRBJ1-4	CTRSAEPISNERLF	82	0.00132256		TRBV26	TRBJ2-5	CASSLNRGTQYF	106	0.00130896
TRBV13-2	TRBJ2-5	CASGDSLGGNNQDTQYF	1543	0.0209143		TRBV3	TRBJ2-7	CASSWDWGGGEQYF	690	0.00902226		TRBV5	TRBJ1-1	CASGQDGGDTEVF	86	0.00122813		TRBV1	TRBJ1-4	CGAEPISNERLF	82	0.00132256		TRBV1	TRBJ2-5	CSNPTGGPSQDTQYF	106	0.00130896
TRBV14	TRBJ2-1	CASRPDRVAEQYF	1534	0.0207923		TRBV13-3	TRBJ2-7	CASGDASQGYEQYF	689	0.00900918		TRBV1	TRBJ2-5	CTRSADWGIQDTQYF	86	0.00122813		TRBV15	TRBJ2-1	CASRSTGGYNYAEQSF	82	0.00132256		TRBV1	TRBJ2-5	CSLRGRDTQYF	106	0.00130896
TRBV29	TRBJ2-1	CASSFRDWDYAEQF	1524	0.0206567		TRBV3	TRBJ1-3	CASSLQGGGNTLYF	688	0.0089961		TRBV1	TRBJ2-5	CSALGADTQYF	86	0.00122813		TRBV13-2	TRBJ1-4	CARRGLSNERLF	82	0.00132256		TRBV1	TRBJ2-5	CSAVGRGLDTQYF	106	0.00130896
TRBV5	TRBJ2-5	CAGSQEGEDTQYF	1522	0.0206296		TRBV1	TRBJ2-3	CSVGTGSSTETLYF	687	0.00898303		TRBV1	TRBJ2-1	CSAGRAERF	86	0.00122813		TRBV12-1	TRBJ2-3	CASSSRQGRAETLYF	82	0.00132256		TRBV1	TRBJ2-5	CSADQSGGSTQYF	106	0.00130896
TRBV13-2	TRBJ2-1	CASGEDTHYAEQF	1515	0.0205347		TRBV3	TRBJ2-5	CASSRLGKDTQYF	685	0.00895688		TRBV13-2	TRBJ2-2	CASGGADRATGQLYF	86	0.00122813		TRBV12-1	TRBJ1-4	CASSAGTGYERF	82	0.00132256		TRBV1	TRBJ2-4	CSADRGQNALYF	106	0.00130896
TRBV13-2	TRBJ1-6	CASGAGTDNSPLYF	1510	0.020467		TRBV3	TRBJ1-4	CASSLVADSNERLF	680	0.0088915		TRBV13-1	TRBJ1-2	CASRTANSDYTF	86	0.00122813		TRBV12-1	TRBJ1-4	CASSAGAGYERLF	82	0.00132256		TRBV1	TRBJ2-1	CSASQGNYAEQF	106	0.00130896
TRBV14	TRBJ1-1	CASSLRTNTEVF	1503	0.0203721		TRBV3	TRBJ2-1	CASSLRLGGLYNYAEQF	672	0.00878689		TRBV13-1	TRBJ1-1	CASSEGQRDTEVF	86	0.00122813		TRBV12-1	TRBJ1-1	CASSPGNTEVF	82	0.00132256		TRBV1	TRBJ1-6	CSVGQRNSPLYF	106	0.00130896
TRBV14	TRBJ2-5	CASSPGDTQYF	1496	0.0202772		TRBV13-2	TRBJ1-4	CASGETGTGEGDGRLF	663	0.00866921		TRBV5	TRBJ2-1	CASRPTGGNYAEQF	85	0.00121385		TRBV29	TRBJ2-1	CASGTGAEQF	81	0.00130643		TRBV1	TRBJ1-5	CTRSAVGDNQAPLF	106	0.00130896
TRBV14	TRBJ2-1	CASSFPGKTEQF	1491	0.0202094		TRBV17	TRBJ2-5	CASSSWGERGDTQYF	658	0.00860383		TRBV5	TRBJ1-4	CASGDASNERLF	85	0.00121385		TRBV1	TRBJ1-4	CSAGPISNERLF	81	0.00130643		TRBV15	TRBJ1-2	CAGSFRTNSDYTF	106	0.00130896
TRBV14	TRBJ2-1	CASSLGPNYAEQF	1489	0.0201823		TRBV3	TRBJ1-5	CASSLGGNNQAPLF	657	0.00859076		TRBV5	TRBJ1-1	CASSQGPNTEVF	85	0.00121385		TRBV1	TRBJ1-4	CSADTQGSNERLF	81	0.00130643		TRBV13-1	TRBJ1-2	CASSLGTANSDYTF	106	0.00130896
TRBV29	TRBJ1-3	CASSPQHSGNTLYF	1484	0.0201146		TRBV13-3	TRBJ2-7	CASSDASQGCEQYF	657	0.00859076		TRBV5	TRBJ1-1	CASSQDGGDTEAF	85	0.00121385		TRBV1	TRBJ1-2	CRLRDGGDSDYTF	81	0.00130643		TRBV5	TRBJ2-5	CASSRDGGVQDTQYF	105	0.00129661
TRBV14	TRBJ1-4	CASSFRDSNERLF	1452	0.0196808		TRBV15	TRBJ2-2	CASSPTGDTGQLYF	656	0.00857768		TRBV31	TRBJ2-3	CAWGQLGGAETLYF	85	0.00121385		TRBV1	TRBJ1-1	CSVDGRNTEVF	81	0.00130643		TRBV5	TRBJ1-1	CASSQGKTGVTEVF	105	0.00129661
TRBV29	TRBJ1-5	CASSLRNNNQAPLF	1444	0.0195724		TRBV29	TRBJ2-1	CASSLSRQGGYAEQF	644	0.00842077		TRBV30	TRBJ2-5	CSSRRGLGQDTQYF	85	0.00121385		TRBV13-2	TRBJ2-3	CASDDGGAETLYF	81	0.00130643		TRBV2	TRBJ2-5	CASSQDSTGGDTQYF	105	0.00129661
TRBV13-2	TRBJ1-2	CASGDAGANSDYTF	1432	0.0194097		TRBV13-1	TRBJ2-4	CASSDVSGGGGQNTLYF	630	0.00823771		TRBV1	TRBJ2-7	CSAKGRGDEQYF	85	0.00121385		TRBV13-2	TRBJ1-4	CASRTASNERLF	81	0.00130643		TRBV2	TRBJ1-5	CASSQEWAPLF	105	0.00129661
TRBV29	TRBJ2-7	CASSLQSSYEQYF	1419	0.0192335		TRBV3	TRBJ2-7	CASSLSAYEQYF	627	0.00819848		TRBV1	TRBJ2-4	CGADLGRQNTSYF	85	0.00121385		TRBV12-1	TRBJ2-7	CASSHDKSYEQYF	81	0.00130643		TRBV1	TRBJ2-7	CSADRTGGSERYF	105	0.00129661
TRBV13-2	TRBJ1-5	CASGDRGNQAPLF	1419	0.0192335		TRBV26	TRBJ2-7	CASSRDGSYEQYF	624	0.00815926		TRBV1	TRBJ2-2	CTRSAGQYTGQLYF	85	0.00121385		TRBV12-1	TRBJ1-4	CASSAGTGHERLF	81	0.00130643		TRBV1	TRBJ2-4	CSAGDSQSTLYF	105	0.00129661
TRBV29	TRBJ1-1	CASSKTGTGDGTEVF	1403	0.0190167		TRBV13-3	TRBJ2-1	CASSDGQGARAEQF	622	0.00813311		TRBV1	TRBJ1-1	CSATQGNTEVF	85	0.00121385		TRBV12-1	TRBJ1-4	CAGSAGTGYERLF	81	0.00130643		TRBV1	TRBJ2-3	CSVGLGNSAETLYF	105	0.00129661
TRBV16	TRBJ2-5	CASSLDDTQYF	1402	0.0190031		TRBV5	TRBJ2-5	CASGQALNQDTQYF	620	0.00810695		TRBV13-3	TRBJ2-1	CASSDQSYAERF	85	0.00121385		TRBV2	TRBJ1-4	CASSQDTVSNERLF	80	0.0012903		TRBV1	TRBJ2-2	CTSTLGGGTGQPYF	105	0.00129661
TRBV14	TRBJ2-4	CASRPQEGQNTLYF	1395	0.0189082		TRBV20	TRBJ1-2	CGARGQGASDYTF	618	0.0080808		TRBV13-2	TRBJ2-7	CASGER_GNEQYF	85	0.00121385		TRBV1	TRBJ1-4	CSAGTQGFNERLF	80	0.0012903		TRBV15	TRBJ1-1	CASSVDRANTEVF	105	0.00129661
TRBV15	TRBJ2-7	CASSLQGYEQYF	1391	0.018854		TRBV12-1	TRBJ2-7	CASSLGLEAYEQYF	617	0.00806773		TRBV13-1	TRBJ1-1	CASSPDRANTEVF	85	0.00121385		TRBV15	TRBJ2-7	CASSLGWGGSSYEQYF	80	0.0012903		TRBV13-3	TRBJ1-1	CASRRINTEVF	105	0.00129661
TRBV14	TRBJ2-1	CASSLDINYAEQF	1389	0.0188269		TRBV1	TRBJ1-1	CSADRGNTEVF	614	0.0080285		TRBV13-1	TRBJ1-1	CASGEAPRDKNTEVF	85	0.00121385		TRBV15	TRBJ2-4	CASSLAVSQNTLYF	80	0.0012903		TRBV13-1	TRBJ1-4	CASGAPTGSNERLF	105	0.00129661
TRBV20	TRBJ1-3	CGARVQGIGNTLYF	1378	0.0186778		TRBV16	TRBJ2-1	CASSLVGGINYAEQF	613	0.00801542		TRBV31	TRBJ2-2	CAWSPPRGSNTGQLYF	84	0.00119957		TRBV15	TRBJ2-1	CASSFWDRGYAEQF	80	0.0012903		TRBV5	TRBJ2-3	CASGQDGGAVAETLYF	104	0.00128426
TRBV29	TRBJ1-1	CASSFGVGTEVF	1372	0.0185965		TRBV15	TRBJ1-5	CATGTGGNQAPLF	609	0.00796312		TRBV1	TRBJ2-4	CTRSADPTKTSQNTLYF	84	0.00119957		TRBV13-2	TRBJ2-5	CASGQDTQYF	80	0.0012903		TRBV29	TRBJ1-1	CASSLKTNSNTEVF	104	0.00128426
TRBV13-2	TRBJ1-2	CASGDASGTTNSDYTF	1364	0.018488		TRBV14	TRBJ2-4	CASSFWQGGQNTLYF	609	0.00796312		TRBV1	TRBJ2-2	CSRGGSNTGQLYF	84	0.00119957		TRBV13-2	TRBJ2-1	CASGTGAERF	80	0.0012903		TRBV26	TRBJ2-7	CASSPGAGGYEQYF	104	0.00128426
TRBV29	TRBJ1-1	CASGPTGGNTEVF	1362	0.0184609		TRBV12-1	TRBJ1-2	CASSNPGHPNSDYAF	609	0.00796312		TRBV1	TRBJ2-2	CSAVRDRNTGQLYF	84	0.00119957		TRBV13-2	TRBJ1-1	CASSLQGTEVF	80	0.0012903		TRBV26	TRBJ1-2	CASSDAAENSDYTF	104	0.00128426
TRBV14	TRBJ1-4	CASSFAGSGERLF	1362	0.0184609		TRBV13-3	TRBJ2-7	CASSDGSQGYEQYF	600	0.00784544		TRBV1	TRBJ1-6	CGAGQYNSPLYF	84	0.00119957		TRBV13-1	TRBJ2-1	CASSSGGALAEQF	80	0.0012903		TRBV1	TRBJ2-7	CSADRFSYGQYF	104	0.00128426
TRBV29	TRBJ2-5	CASSAGTGGRDTQYF	1361	0.0184474		TRBV3	TRBJ2-1	CASSTGFNYAEQF	594	0.00776699		TRBV1	TRBJ1-5	CSGGTNDQAQHF	84	0.00119957		TRBV31	TRBJ2-1	CAWTWGANYAEQF	79	0.00127417		TRBV1	TRBJ2-3	CSAPTEGGGAETLYF	104	0.00128426
TRBV5	TRBJ1-2	CASSQKQGANSDYTF	1355	0.0183661		TRBV3	TRBJ1-2	CASSLEQGLADYTF	594	0.00776699		TRBV14	TRBJ1-3	CASKDRVGNTPYF	84	0.00119957		TRBV1	TRBJ1-4	CSPDANNERLF	79	0.00127417		TRBV1	TRBJ2-1	CSADEGNYAERF	104	0.00128426
TRBV3	TRBJ2-7	CASSEPGTGYEQYF	1346	0.0182441		TRBV3	TRBJ1-4	CASSLQISNERLF	582	0.00761008		TRBV13-2	TRBJ2-5	CASSSTGNNQDTQYF	84	0.00119957		TRBV1	TRBJ1-4	CSADTQGFNGRLF	79	0.00127417		TRBV1	TRBJ1-1	CSADRANTEVF	104	0.00128426
TRBV31	TRBJ1-4	CAWSLQGDNERLF	1346	0.0182441		TRBV3	TRBJ1-2	CASSLGTNSDYTF	559	0.00730933		TRBV13-2	TRBJ2-1	CASGDQSYAEQF	84	0.00119957		TRBV1	TRBJ1-1	CSEQGRDTEVSF	79	0.00127417		TRBV13-3	TRBJ1-5	CASSGPTNNNQAPPF	104	0.00128426
TRBV13-2	TRBJ1-1	CASSLTGPSNTEVF	1341	0.0181763		TRBV13-3	TRBJ2-7	CVSSDASQGYEQYF	559	0.00730933		TRBV13-1	TRBJ2-7	CASSDAGYEQYF	84	0.00119957		TRBV15	TRBJ1-4	CASSSSHFSNERLF	79	0.00127417		TRBV13-2	TRBJ1-5	CASRDTNNQAPLF	104	0.00128426
TRBV14	TRBJ2-5	CASRTGGGDTQYF	1337	0.0181221		TRBV3	TRBJ2-3	CASSFPGGAETLYF	539	0.00704782		TRBV13-1	TRBJ2-7	CASGERLGREQYF	84	0.00119957		TRBV15	TRBJ1-4	CAGSLSHFSNERLF	79	0.00127417		TRBV5	TRBJ2-7	CASSPTGGSHEQYF	103	0.00127191
TRBV13-2	TRBJ1-5	CASGDTNNNQAPLF	1333	0.0180679		TRBV26	TRBJ1-2	CASSLTGTNSGYTF	530	0.00693014		TRBV5	TRBJ2-5	CASSQAVNQDAQYF	83	0.00118529		TRBV13-3	TRBJ2-1	CASSPWDWGYAEQF	79	0.00127417		TRBV5	TRBJ1-1	CASGVPGQGPNTEVF	103	0.00127191
TRBV13-2	TRBJ2-7	CASGETGSYEQYF	1325	0.0179594		TRBV3	TRBJ2-3	CASSLEGWNSAETLYF	526	0.00687784		TRBV5	TRBJ2-5	CASSLGLGTQDTQYF	83	0.00118529		TRBV13-2	TRBJ1-1	CASKTGEGTEVF	79	0.00127417		TRBV1	TRBJ2-7	CSADTYERYF	103	0.00127191
TRBV14	TRBJ2-7	CASRWGGAVEQYF	1323	0.0179323		TRBV13-2	TRBJ2-5	CASGETGDQDTQYF	526	0.00687784		TRBV5	TRBJ1-1	CASSPDSTEVF	83	0.00118529		TRBV13-1	TRBJ2-7	CASSDTGGVEQYF	79	0.00127417		TRBV1	TRBJ2-1	CSARDSNCAEQF	103	0.00127191
TRBV14	TRBJ1-3	CASSFSGGASGNTLYF	1321	0.0179052		TRBV1	TRBJ2-4	CSAGLGKQNTLYF	520	0.00679938		TRBV1	TRBJ2-5	CSADLGDQDTQHF	83	0.00118529		TRBV13-1	TRBJ2-1	CASSDPGQNYAEQF	79	0.00127417		TRBV1	TRBJ1-4	CTALSNERLF	103	0.00127191
TRBV13-2	TRBJ2-5	CASGPPGLGGVNQDTQYF	1321	0.0179052		TRBV3	TRBJ2-4	CASSAGTGSSQNTLYF	519	0.00678631		TRBV1	TRBJ2-3	CTRSAGQTSAETLYF	83	0.00118529		TRBV12-2	TRBJ2-7	CASSRDWGYEQYF	79	0.00127417		TRBV1	TRBJ1-1	CSADGADTEVF	103	0.00127191
TRBV3	TRBJ1-5	CASSLRGNQAPLF	1313	0.0177968		TRBV23	TRBJ2-7	CSSSQRTGGLEQYF	497	0.00649864		TRBV1	TRBJ2-2	CSAEGQGAGQLHF	83	0.00118529		TRBV12-1	TRBJ1-4	CASSREGNERLF	79	0.00127417		TRBV15	TRBJ1-2	CASSSRTNSDYTF	103	0.00127191
TRBV13-2	TRBJ1-4	CASGVRDRGNERLF	1307	0.0177154		TRBV14	TRBJ2-1	CASSLDWENYAEQF	497	0.00649864		TRBV1	TRBJ2-2	CSADWGGTGQLYF	83	0.00118529		TRBV12-1	TRBJ1-4	CASSLESISNERLF	79	0.00127417		TRBV15	TRBJ1-1	CASSQTGGDTEVF	103	0.00127191
TRBV13-2	TRBJ2-4	CASGDMGRQNTLYF	1295	0.0175528		TRBV1	TRBJ2-5	CSAGLGEQNTLYF	496	0.00648556		TRBV1	TRBJ1-1	CSAAQRNTEVF	83	0.00118529		TRBV5	TRBJ2-5	CASSWTGGHQDTQYF	78	0.00125804		TRBV13-3	TRBJ2-3	CASSDARGPSAETLHF	103	0.00127191
TRBV13-3	TRBJ2-5	CASTQGNQDTQYF	1292	0.0175121		TRBV13-2	TRBJ2-4	CASGDD_GGQNTLYF	491	0.00642018		TRBV13-2	TRBJ1-2	CASSGQNSDYTF	83	0.00118529		TRBV5	TRBJ2-4	CASGQEGRGQNTLYF	78	0.00125804		TRBV5	TRBJ2-7	CASSTHERAYEQYF	102	0.00125957
TRBV5	TRBJ2-3	CASSLTNWRSAETLYF	1290	0.017485		TRBV3	TRBJ2-7	CASSLGEQYF	487	0.00636788		TRBV13-2	TRBJ1-1	CASSQGQGANTEVF	83	0.00118529		TRBV26	TRBJ1-1	CASSRDRNTEVF	78	0.00125804		TRBV5	TRBJ1-6	CAGSPGTNSYNSPLYF	102	0.00125957
TRBV13-2	TRBJ1-2	CASGANSDYTF	1285	0.0174173		TRBV17	TRBJ2-4	CASSSGTKNTLYF	478	0.0062502		TRBV13-2	TRBJ1-1	CASGDGRPNTEVF	83	0.00118529		TRBV26	TRBJ1-1	CASRPGQNAEVF	78	0.00125804		TRBV5	TRBJ1-1	CASSQDKAGVTEVF	102	0.00125957
TRBV13-2	TRBJ2-7	CASGDEGGGACEQYF	1284	0.0174037		TRBV13-3	TRBJ1-6	CVSSDPNSPLYF	474	0.0061979		TRBV5	TRBJ2-3	CASSPSLGGRGAETLYF	82	0.00117101		TRBV1	TRBJ2-7	CSAVGGKCEQYF	78	0.00125804		TRBV5	TRBJ1-1	CASSLKTNSNTEVVF	102	0.00125957
TRBV13-2	TRBJ2-1	CASGDWGGYAEQF	1282	0.0173766		TRBV19	TRBJ2-2	CASSIDWTGQLYF	469	0.00613252		TRBV1	TRBJ2-5	CSAGGLGQGTQYF	82	0.00117101		TRBV1	TRBJ2-7	CGGDRSYEQYF	78	0.00125804		TRBV31	TRBJ2-1	CASTGGVYAEQF	102	0.00125957
TRBV13-2	TRBJ2-2	CASGDDWGPTGQLYF	1278	0.0173224		TRBV3	TRBJ2-7	CASSTGTGGGYEQYF	467	0.00610637		TRBV1	TRBJ2-4	CSAEGEKSQNTSYF	82	0.00117101		TRBV1	TRBJ2-5	CTRSERDWGHQDTQYF	78	0.00125804		TRBV26	TRBJ2-4	CSGDNSQNTLYF	102	0.00125957
TRBV29	TRBJ2-7	CASSLGTAYEQYF	1264	0.0171326		TRBV13-3	TRBJ2-7	CASSDTSQGYEQYF	463	0.00605406		TRBV1	TRBJ2-2	CSAIRDSNTGQLYF	82	0.00117101		TRBV13-2	TRBJ1-1	CASSRDRNTEVF	78	0.00125804		TRBV26	TRBJ1-2	CASSQGRTNSDYTF	102	0.00125957
TRBV13-2	TRBJ2-1	CASGDDTPNYAEQF	1258	0.0170513		TRBV13-3	TRBJ2-7	CTSSDASQGYEQYF	462	0.00604099		TRBV1	TRBJ2-1	CSADGPGGYAEQF	82	0.00117101		TRBV13-1	TRBJ1-2	CASGEVGQGNSDYTF	78	0.00125804		TRBV1	TRBJ1-3	CTRSADHWNSGNTLYF	102	0.00125957
TRBV13-2	TRBJ1-1	CASGGPTGTEVF	1244	0.0168615		TRBV3	TRBJ1-3	CASSPGQGAGNTLYF	455	0.00594946		TRBV1	TRBJ1-1	CSAGDTEVSF	82	0.00117101		TRBV12-1	TRBJ2-7	CAWRRTGPEQYF	78	0.00125804		TRBV1	TRBJ1-3	CSISSGNTLYF	102	0.00125957
TRBV13-1	TRBJ1-1	CASSTGFTEVF	1243	0.016848		TRBV23	TRBJ2-1	CSSSPWGYYAEQF	455	0.00594946		TRBV5	TRBJ2-5	CASSLQYQDTQYF	81	0.00115673		TRBV12-1	TRBJ2-7	CASSLEGGAHEQYF	78	0.00125804		TRBV1	TRBJ1-1	CRVPGGVTEVF	102	0.00125957
TRBV29	TRBJ2-7	CASSEGLGGEQYF	1235	0.0167395		TRBV1	TRBJ2-4	CSAGLEEQNTLYF	449	0.005871		TRBV5	TRBJ2-1	CASGPDWGNAEQF	81	0.00115673		TRBV12-1	TRBJ2-7	CARSLDKSYEQYF	78	0.00125804		TRBV1	TRBJ1-1	CGGQGARATEVF	102	0.00125957
TRBV13-2	TRBJ2-1	CASGPGLGGRAEQF	1235	0.0167395		TRBV20	TRBJ1-5	CGAGQDNNQAPLF	447	0.00584485		TRBV5	TRBJ1-4	CASSPPGHNEGLF	81	0.00115673		TRBV31	TRBJ1-3	CAWSLLRNSGDTLYF	77	0.00124192		TRBV13-1	TRBJ1-3	CSAGQGAGNTLYF	102	0.00125957
TRBV14	TRBJ2-7	CASSLTQGAREQYF	1234	0.016726		TRBV13-3	TRBJ2-7	CASSDVSQGYEQYF	444	0.00580563		TRBV1	TRBJ1-1	CSADGSANTEVLF	81	0.00115673		TRBV1	TRBJ1-6	CTRSAEDIYNSPLYF	77	0.00124192		TRBV12-1	TRBJ2-7	CASSSGTGGAREQYF	102	0.00125957
TRBV29	TRBJ2-4	CASSQGSQNTLYF	1223	0.0165769		TRBV13-1	TRBJ2-1	CSGDWGLYAEQF	440	0.00575332		TRBV13-2	TRBJ2-1	CASSPDWGNAEQF	81	0.00115673		TRBV15	TRBJ2-1	CASSPWDWGYAEQCF	77	0.00124192		TRBV5	TRBJ1-1	CASSDVGEVF	101	0.00124722
TRBV13-2	TRBJ2-5	CASGDPRNQDTQYF	1219	0.0165227		TRBV13-3	TRBJ2-7	CASSDASQGYE_YF	439	0.00574025		TRBV13-2	TRBJ1-4	CASGGAFGGISNERLF	81	0.00115673		TRBV15	TRBJ2-1	CASRPTGGYNYAEQF	77	0.00124192		TRBV2	TRBJ1-4	CASSQDRENNERLF	101	0.00124722
TRBV13-2	TRBJ2-7	CASGEQGTGGALEQYF	1187	0.0160889		TRBV15	TRBJ1-1	CASSFNANTEVF	425	0.00555719		TRBV13-2	TRBJ1-4	CASGDASNKRLF	81	0.00115673		TRBV13-1	TRBJ2-5	CASSERTKDTQYF	77	0.00124192		TRBV1	TRBJ2-7	CGAEGGGEQYF	101	0.00124722
TRBV31	TRBJ1-2	CAWGQTDANSDYTF	1185	0.0160618		TRBV24	TRBJ2-1	CILEILSSEEDDSALYLCASSLYSDAEQF	416	0.0054395		TRBV13-1	TRBJ2-2	CASGDADRATGQLYF	81	0.00115673		TRBV12-1	TRBJ2-7	CASSSQGEQYF	77	0.00124192		TRBV1	TRBJ2-1	CRADTGAEQF	101	0.00124722
TRBV29	TRBJ1-2	CASSSNSDYTF	1183	0.0160347		TRBV13-3	TRBJ2-7	CASSDASQDYEQYF	406	0.00530875		TRBV13-1	TRBJ1-1	CASSEGQGNTEVF	81	0.00115673		TRBV12-1	TRBJ2-7	CASRLSYEQYF	77	0.00124192		TRBV16	TRBJ1-1	CASSLAGTDTEVF	101	0.00124722
TRBV14	TRBJ2-1	CASSSRGGAEQF	1183	0.0160347		TRBV1	TRBJ1-3	CSASGTGGNTLYF	404	0.0052826		TRBV13-1	TRBJ1-1	CASSDGRNTEIF	81	0.00115673		TRBV12-1	TRBJ2-1	CASGTGAEQF	77	0.00124192		TRBV13-3	TRBJ1-1	CASSGTGEEVF	101	0.00124722
TRBV13-2	TRBJ1-4	CASGVENERLF	1162	0.0157501		TRBV13-2	TRBJ1-2	CASGDADGGYSDYTF	402	0.00525644		TRBV5	TRBJ1-5	CASSQVSQNSQAPLF	80	0.00114245		TRBV1	TRBJ2-1	CSAPAEQF	76	0.00122579		TRBV13-2	TRBJ2-5	CASGEGTGRDTQYF	101	0.00124722
TRBV29	TRBJ2-3	CASSLHTSAETLYF	1155	0.0156552		TRBV13-2	TRBJ2-5	CASSDRGPNQDTQYF	399	0.00521722		TRBV1	TRBJ2-5	CSAGWGIQDTQYF	80	0.00114245		TRBV1	TRBJ1-1	CSEQGRGTEVF	76	0.00122579		TRBV13-1	TRBJ1-2	CASSLRANSDYTF	101	0.00124722
TRBV13-2	TRBJ1-4	CASGRDINERLF	1152	0.0156145		TRBV17	TRBJ2-3	CASGQGRAETLYF	398	0.00520414		TRBV1	TRBJ2-5	CGADLGDQDTQYF	80	0.00114245		TRBV19	TRBJ2-2	CASSISRANTGQLYF	76	0.00122579		TRBV5	TRBJ1-1	CASSQGRGDTEVF	100	0.00123487
TRBV13-2	TRBJ2-4	CASGDAGTGGSQSTLYF	1145	0.0155197		TRBV17	TRBJ1-1	CASSRAPGTSTEVF	397	0.00519107		TRBV1	TRBJ2-4	CSGWGGQNTLYF	80	0.00114245		TRBV15	TRBJ2-5	CASSPGTGVDTQYF	76	0.00122579		TRBV31	TRBJ1-5	CASRDANNQAPLF	100	0.00123487
TRBV13-2	TRBJ1-6	CASGGGQGYSPLYF	1145	0.0155197		TRBV1	TRBJ2-2	CSAGGQGDTGQLYF	389	0.00508646		TRBV1	TRBJ2-3	CSAGQASAETLYF	80	0.00114245		TRBV15	TRBJ1-4	CASSLSHFSNEGLF	76	0.00122579		TRBV1	TRBJ2-3	CSADGDRAPAEALYF	100	0.00123487
TRBV29	TRBJ1-1	CASSLTGPSNAEVF	1128	0.0152892		TRBV13-3	TRBJ2-7	CANSDASQGYEQYF	389	0.00508646		TRBV1	TRBJ2-1	CSRRGYAEQLF	80	0.00114245		TRBV13-3	TRBJ2-7	CASSPDKTYEQYF	76	0.00122579		TRBV1	TRBJ2-2	CSAVASTGQLYF	100	0.00123487
TRBV14	TRBJ1-1	CASSFWGGKVF	1128	0.0152892		TRBV15	TRBJ2-1	CASSGSGVYAEQF	388	0.00507338		TRBV1	TRBJ1-4	CSAGWGRDERLF	80	0.00114245		TRBV13-2	TRBJ2-4	CASRGQGQNTLYF	76	0.00122579		TRBV1	TRBJ2-1	CTRKPGLGDAEQF	100	0.00123487
TRBV14	TRBJ2-5	CASSFSDNQDTQYF	1127	0.0152757		TRBV1	TRBJ2-4	CNAGLGEQNTLYF	387	0.00506031		TRBV13-2	TRBJ2-3	CTCSADPETLYF	80	0.00114245		TRBV13-1	TRBJ1-6	CASSDAGDTPLYF	76	0.00122579		TRBV1	TRBJ2-1	CKPGLGGAEQF	100	0.00123487
TRBV1	TRBJ1-6	CSAPGHFNSYNSPPYF	1126	0.0152621		TRBV1	TRBJ2-4	CSAGLGEQTTLYF	382	0.00499493		TRBV13-2	TRBJ1-5	CTSRAGTYNNQAPPF	80	0.00114245		TRBV12-1	TRBJ2-7	CASSSRDWGVYEQYF	76	0.00122579		TRBV13-3	TRBJ2-1	CASSGGGNYAEQLF	100	0.00123487
TRBV13-2	TRBJ1-2	CASGQQNSDYTF	1121	0.0151944		TRBV1	TRBJ2-5	CSAAWGQDIQYF	381	0.00498185		TRBV13-1	TRBJ2-5	CASSGLL_DTQYF	80	0.00114245		TRBV12-1	TRBJ2-7	CASSPDKTYKQYF	76	0.00122579		TRBV13-3	TRBJ1-5	CAGSGPTNNNQAPLF	100	0.00123487
TRBV3	TRBJ2-3	CASSRTASAETLYF	1120	0.0151808		TRBV3	TRBJ2-7	CASSPGTGGSSYEQYF	373	0.00487725		TRBV13-1	TRBJ2-4	CASSDKNTLYF	80	0.00114245		TRBV5	TRBJ2-5	CASSRTGVQDTQYF	75	0.00120966		TRBV13-3	TRBJ1-1	CASSGTSTEVSF	100	0.00123487
TRBV29	TRBJ1-1	CASSSGQGDTEVF	1120	0.0151808		TRBV17	TRBJ2-1	CASRPGQGYAEQF	369	0.00482495		TRBV13-1	TRBJ1-4	CASGDATGNERLF	80	0.00114245		TRBV5	TRBJ1-6	CASSDAGDSPLYF	75	0.00120966		TRBV13-3	TRBJ1-1	CASRQVNTEVF	100	0.00123487
TRBV13-2	TRBJ1-1	CASGDLGVF	1113	0.0150859		TRBV31	TRBJ1-6	CAWSPKDASYNSPLYF	368	0.00481187		TRBV13-1	TRBJ1-2	CASGDARGAENSDYTF	80	0.00114245		TRBV1	TRBJ2-5	CSERDWGHQDAQYF	75	0.00120966		TRBV5	TRBJ2-7	CASSPGLLYEQYF	99	0.00122252
TRBV14	TRBJ1-6	CASRRQGYDSPLYF	1107	0.0150046		TRBV20	TRBJ2-7	CGARADYEQYF	368	0.00481187		TRBV13-1	TRBJ1-1	CASSEGQRSTEVF	80	0.00114245		TRBV1	TRBJ2-3	CSADRAGGVETLYF	75	0.00120966		TRBV31	TRBJ2-1	CAWSPTGGVYAEQF	99	0.00122252
TRBV16	TRBJ2-5	CASSLAGTQDTQYF	1104	0.0149639		TRBV17	TRBJ2-7	CASSRDEGYEQYF	368	0.00481187		TRBV5	TRBJ2-7	CASSQDYHWGYERYF	79	0.00112817		TRBV1	TRBJ2-1	CGGVAEQF	75	0.00120966		TRBV26	TRBJ1-2	CASSLGTAISDYTF	99	0.00122252
TRBV29	TRBJ2-7	CASRGQSSYEQYF	1102	0.0149368		TRBV1	TRBJ2-3	CSVGTGGSAETLYF	365	0.00477264		TRBV5	TRBJ2-7	CASSHGLGVSYEQYF	79	0.00112817		TRBV1	TRBJ1-1	CSVDIANTEAF	75	0.00120966		TRBV1	TRBJ2-7	CGAGGQGYEQYF	99	0.00122252
TRBV29	TRBJ2-7	CASSLF	1088	0.0147471		TRBV1	TRBJ2-4	CSADGGQGGQNALYF	364	0.00475957		TRBV31	TRBJ1-1	CAWGLDREVF	79	0.00112817		TRBV19	TRBJ1-1	CASTRQDANTEVF	75	0.00120966		TRBV1	TRBJ2-4	CSAGDSQNTSYF	99	0.00122252
TRBV29	TRBJ1-6	CASSFWGINSPLYF	1081	0.0146522		TRBV17	TRBJ2-7	CASSRRGLGPYEQYF	363	0.00474649		TRBV30	TRBJ2-7	CSSRDRDSYGQYF	79	0.00112817		TRBV15	TRBJ2-1	CASSPWNWGYAEQF	75	0.00120966		TRBV1	TRBJ2-3	CSAGGQGNSAETLYF	99	0.00122252
TRBV13-2	TRBJ2-4	CASGDAKGSQNTLYF	1064	0.0144218		TRBV12-1	TRBJ2-1	CASSFRQGYAEQF	361	0.00472034		TRBV1	TRBJ2-7	CSAKGQGDERYF	79	0.00112817		TRBV13-2	TRBJ2-7	CASSDTGGVEQYF	75	0.00120966		TRBV1	TRBJ2-1	CSAGHNSYAEQF	99	0.00122252
TRBV3	TRBJ2-2	CASSFEGGPGQLYF	1052	0.0142591		TRBV1	TRBJ1-1	CSAERGNTGVF	360	0.00470726		TRBV1	TRBJ2-5	CTYSATKDTQYF	79	0.00112817		TRBV13-2	TRBJ1-5	CASGEEGSNQAPLF	75	0.00120966		TRBV1	TRBJ1-5	CTYSADQEAPLF	99	0.00122252
TRBV14	TRBJ1-1	CASSFRVSTEVF	1051	0.0142456		TRBV26	TRBJ2-7	CASSDASQGYEQYF	357	0.00466804		TRBV1	TRBJ2-5	CSAGASQDTQCF	79	0.00112817		TRBV13-2	TRBJ1-3	CASGGTGRDTLYF	75	0.00120966		TRBV12-1	TRBJ1-6	CASGESYNSPLYF	99	0.00122252
TRBV5	TRBJ2-5	CASSHLKDTQYF	1048	0.0142049		TRBV13-3	TRBJ2-5	CASSPPQGKDTQYF	357	0.00466804		TRBV1	TRBJ2-4	CSGDWGSTLYF	79	0.00112817		TRBV13-1	TRBJ2-1	CASSPQEQF	75	0.00120966		TRBV26	TRBJ2-7	CASSRTGYEQYF	98	0.00121017
TRBV3	TRBJ1-6	CASSLAGQNSPLYF	1045	0.0141642		TRBV1	TRBJ2-3	CTRSVGTGSSAETLYF	356	0.00465496		TRBV1	TRBJ1-4	CTRSGDRISNERLF	79	0.00112817		TRBV13-1	TRBJ1-6	CASSDAGHSPLYF	75	0.00120966		TRBV26	TRBJ2-5	CASSDRDQDTQYF	98	0.00121017
TRBV3	TRBJ2-5	CASSLVVTGSVDTQYF	1042	0.0141236		TRBV17	TRBJ2-7	CASSRRGAGEQYF	351	0.00458958		TRBV1	TRBJ1-1	CTRSAGGQANTEVF	79	0.00112817		TRBV13-1	TRBJ1-1	CASGGQGAEVF	75	0.00120966		TRBV1	TRBJ2-7	CSFSGAGSYEQYF	98	0.00121017
TRBV1	TRBJ2-3	CSADSGASAGTLYF	1034	0.0140151		TRBV14	TRBJ2-1	CASSFGQGYAEQF	344	0.00449805		TRBV1	TRBJ1-1	CSASGTGGAEVF	79	0.00112817		TRBV12-1	TRBJ2-7	CASGSGGEEQYF	75	0.00120966		TRBV1	TRBJ2-7	CSASGGGQYF	98	0.00121017
TRBV3	TRBJ2-4	CASSLELDTLYF	1032	0.013988		TRBV13-3	TRBJ2-7	CASSDASQSYEQYF	342	0.0044719		TRBV14	TRBJ1-3	CASSPPDSGNTLYF	79	0.00112817		TRBV12-1	TRBJ2-3	CASSLETGAETLYF	75	0.00120966		TRBV1	TRBJ2-7	CGADRFSYEQYF	98	0.00121017
TRBV14	TRBJ1-4	CASSFWQGISNERLF	1032	0.013988		TRBV13-1	TRBJ1-6	CASGDTSYNSPLYF	342	0.0044719		TRBV13-2	TRBJ2-7	CASDERQGNEQYF	79	0.00112817		TRBV5	TRBJ1-5	CASSQDLSYDNQAPLF	74	0.00119353		TRBV1	TRBJ2-3	CSDARGPSAETLYF	98	0.00121017
TRBV1	TRBJ1-2	CSAGTQNSDYTF	1030	0.0139609		TRBV1	TRBJ2-3	CSAGTGSSAETLYF	339	0.00443267		TRBV13-1	TRBJ2-7	CASGSYEQYF	79	0.00112817		TRBV5	TRBJ1-3	CASSWDSSGNTLYF	74	0.00119353		TRBV1	TRBJ1-5	CSTGTGVNQAPLF	98	0.00121017
TRBV14	TRBJ2-5	CASSPPHRGRDTQYF	1030	0.0139609		TRBV3	TRBJ2-7	CASSLDWSSYEQYF	338	0.0044196		TRBV13-1	TRBJ1-1	CASSDAQEDTEVF	79	0.00112817		TRBV1	TRBJ2-7	CSAGQTRGAYEQYF	74	0.00119353		TRBV1	TRBJ1-5	CSAVGDDQAPLF	98	0.00121017
TRBV3	TRBJ1-2	CASSFQGANSDYTF	1028	0.0139338		TRBV17	TRBJ2-7	CASSSSGGWEQYF	338	0.0044196		TRBV5	TRBJ2-7	CASSQGPGGTRSSYEQYF	78	0.00111389		TRBV1	TRBJ2-4	CSADRPGVSQNTLYF	74	0.00119353		TRBV1	TRBJ1-3	CSATGVGGDTLYF	98	0.00121017
TRBV13-2	TRBJ2-1	CASGDVGVNYAEQF	1022	0.0138525		TRBV17	TRBJ2-5	CASSRDLGGRQDTQYF	338	0.0044196		TRBV5	TRBJ2-3	CASSLQGSSAETLYF	78	0.00111389		TRBV1	TRBJ2-4	CSADQDWGGRQNTLYF	74	0.00119353		TRBV13-1	TRBJ2-7	CASSDRSSYEQYF	98	0.00121017
TRBV1	TRBJ1-6	CTRSAPGHFNSYNSPLYF	1012	0.0137169		TRBV17	TRBJ2-2	CASSRTANTGQLYF	334	0.00436729		TRBV5	TRBJ1-5	CASSQVSQSNQAPLF	78	0.00111389		TRBV1	TRBJ1-1	CSERGRDTEVF	74	0.00119353		TRBV5	TRBJ1-2	CASSLRANSDYTF	97	0.00119782
TRBV3	TRBJ2-3	CASSPGTGGSAETLYF	999	0.0135407		TRBV17	TRBJ2-7	CASSRGTGGALEQYF	333	0.00435422		TRBV1	TRBJ2-5	CSAGASQDTRYF	78	0.00111389		TRBV15	TRBJ2-3	CASSFGGGAETLYF	74	0.00119353		TRBV26	TRBJ1-2	CASSQGQTNSDYAF	97	0.00119782
TRBV3	TRBJ2-1	CASSPGGNYAEQF	996	0.0135001		TRBV3	TRBJ2-1	CASSFRDNYAEQF	327	0.00427576		TRBV1	TRBJ2-3	CSGQGAETLYF	78	0.00111389		TRBV15	TRBJ1-4	CASSLSHFSNEK_SF	74	0.00119353		TRBV1	TRBJ2-7	CSATGGAYERYF	97	0.00119782
TRBV16	TRBJ1-3	CASSPQISGNTLYF	991	0.0134323		TRBV1	TRBJ2-4	CSAELGEQNTLYF	325	0.00424961		TRBV1	TRBJ2-1	CSADSLGGYAEQF	78	0.00111389		TRBV13-3	TRBJ2-5	CAGSERTKDTQYF	74	0.00119353		TRBV1	TRBJ2-7	CSADRFSHEQYF	97	0.00119782
TRBV3	TRBJ1-1	CASSFLREGTEVF	985	0.013351		TRBV12-1	TRBJ2-5	CAGSPGTAPDTQYF	324	0.00423654		TRBV1	TRBJ1-1	CSAAQGNTKVF	78	0.00111389		TRBV13-3	TRBJ2-3	CASSATSAETPYF	74	0.00119353		TRBV1	TRBJ2-5	CRAVGDQDTQYF	97	0.00119782
TRBV3	TRBJ2-1	CASSLALRQVNYAEQF	984	0.0133374		TRBV13-3	TRBJ2-7	CASSNASQGYEQYF	323	0.00422346		TRBV13-2	TRBJ2-7	CASGDARYEQYF	78	0.00111389		TRBV13-2	TRBJ2-3	CASSDGTTSAETLYF	74	0.00119353		TRBV1	TRBJ2-1	CSAGHDNYAEQF	97	0.00119782
TRBV3	TRBJ2-7	CASSLAWGAQYF	968	0.0131205		TRBV1	TRBJ2-4	CSAGLGE_NTLYF	320	0.00418423		TRBV5	TRBJ2-1	CANMSQGRTLYCTCSADGLGGYAEQF	77	0.00109961		TRBV12-1	TRBJ1-4	CASSSSNERLF	74	0.00119353		TRBV1	TRBJ2-1	CKPGPGDAEQF	97	0.00119782
TRBV29	TRBJ1-3	CASSLPYSGNTLYF	960	0.0130121		TRBV1	TRBJ2-3	CSVGTGSSAETPYF	319	0.00417116		TRBV5	TRBJ1-1	CAGSQGLNTEVF	77	0.00109961		TRBV1	TRBJ2-4	CAGHQNALYF	73	0.0011774		TRBV1	TRBJ1-6	CSVGQYNSPLYF	97	0.00119782
TRBV3	TRBJ2-1	CASRTGGGYAEQF	949	0.012863		TRBV13-2	TRBJ2-7	CASGEGGYEQCF	315	0.00411886		TRBV31	TRBJ2-2	CSAVRDSNTGQLYF	77	0.00109961		TRBV1	TRBJ2-3	CTYSADRAGGAETLYF	73	0.0011774		TRBV1	TRBJ1-1	CGARGTEVF	97	0.00119782
TRBV26	TRBJ1-4	CASGTGFNERLF	949	0.012863		TRBV20	TRBJ1-1	CGARWTANTEVF	314	0.00410578		TRBV1	TRBJ2-7	CTRSADRGGGYEQYF	77	0.00109961		TRBV1	TRBJ1-4	CTWSADANNERLF	73	0.0011774		TRBV16	TRBJ1-3	CASSPNPGNTPYF	97	0.00119782
TRBV19	TRBJ2-7	CASSINYEQYF	949	0.012863		TRBV1	TRBJ2-7	CSPSGAGGYEQYF	313	0.0040927		TRBV1	TRBJ2-5	CSVTKDTQYF	77	0.00109961		TRBV1	TRBJ1-1	CSADRGGITEVLF	73	0.0011774		TRBV15	TRBJ1-2	CASSFRTSSDYTF	97	0.00119782
TRBV13-2	TRBJ2-2	CASGDAQGAGQLYF	939	0.0127275		TRBV13-2	TRBJ2-4	CASGETGAANTLYF	313	0.0040927		TRBV1	TRBJ2-5	CSTTKDTQYF	77	0.00109961		TRBV15	TRBJ1-1	CASSLRGDGDTEVF	73	0.0011774		TRBV15	TRBJ1-2	CASSFGTNSDYTF	97	0.00119782
TRBV29	TRBJ1-2	CASRQGWGSDYTF	938	0.0127139		TRBV26	TRBJ2-5	CAGSHPGQGQDTQYF	312	0.00407963		TRBV1	TRBJ1-4	CSAGDEGLF	77	0.00109961		TRBV13-2	TRBJ2-7	CASSEGTVGEQYF	73	0.0011774		TRBV14	TRBJ2-7	CASSRTGYERYF	97	0.00119782
TRBV13-1	TRBJ2-5	CASSDEGGPDTQYF	938	0.0127139		TRBV31	TRBJ2-7	CAWSLTGCF	306	0.00400117		TRBV1	TRBJ1-3	CSAGTGETLYF	77	0.00109961		TRBV13-2	TRBJ2-4	CARLGVQNTLYF	73	0.0011774		TRBV13-3	TRBJ2-7	CASSTHERAYEQYF	97	0.00119782
TRBV3	TRBJ2-1	CASSPQGADYAEQF	934	0.0126597		TRBV13-3	TRBJ1-3	CASSSGTGGEGNTLYF	304	0.00397502		TRBV13-2	TRBJ2-7	CAWDWGYEQYF	77	0.00109961		TRBV13-2	TRBJ2-3	CASSWTGASAETLYF	73	0.0011774		TRBV13-3	TRBJ2-3	CASSDARGPGAETLYF	97	0.00119782
TRBV29	TRBJ1-1	CASSLTGPSNTEVLF	934	0.0126597		TRBV13-1	TRBJ1-2	CASSDRAGRDSDYTF	304	0.00397502		TRBV13-2	TRBJ2-1	CASGDGTGGAEQLF	77	0.00109961		TRBV13-2	TRBJ2-3	CASSPTSAETLYF	73	0.0011774		TRBV13-3	TRBJ2-1	CASSQGLGGRGAEQF	97	0.00119782
TRBV3	TRBJ2-5	CASSLAINQDTQYF	926	0.0125513		TRBV5	TRBJ2-1	CASSFRQGYAEQF	302	0.00394887		TRBV13-1	TRBJ2-3	CASGDAGRGSAETLYF	77	0.00109961		TRBV12-2	TRBJ2-1	CASSLWDNYAEQF	73	0.0011774		TRBV13-2	TRBJ1-1	CASGVPGRGPNTEVF	97	0.00119782
TRBV14	TRBJ1-4	CASTSTGETNERLF	920	0.0124699		TRBV17	TRBJ2-1	CASSRTGGAYAEQF	300	0.00392272		TRBV5	TRBJ2-3	CASSQGWASAETLYF	76	0.00108533		TRBV12-1	TRBJ2-7	CASSLALGGADEQYF	73	0.0011774		TRBV5	TRBJ1-6	CASGPDRDNSPLYF	96	0.00118547
TRBV3	TRBJ2-4	CASSRDRGSQNTLYF	919	0.0124564		TRBV1	TRBJ1-3	CSEDSGNTLCF	298	0.00389657		TRBV5	TRBJ2-3	CAGSQDWASAETLYF	76	0.00108533		TRBV12-1	TRBJ2-7	CASSFRDWGYEQYF	73	0.0011774		TRBV5	TRBJ1-1	CASSRDKTGVTEVF	96	0.00118547
TRBV3	TRBJ2-3	CASSSTGGGSAETLYF	910	0.0123344		TRBV13-3	TRBJ2-7	CSDASQGYEQYF	297	0.00388349		TRBV5	TRBJ1-2	CASSQDGTANPDYTF	76	0.00108533		TRBV12-1	TRBJ2-3	CASDDSGAETLYF	73	0.0011774		TRBV5	TRBJ1-1	CASSQDRTGVTEVF	96	0.00118547
TRBV13-2	TRBJ2-4	CASGGTGSSQNTLYF	909	0.0123208		TRBV17	TRBJ2-5	CASSSGGAQDTQYF	296	0.00387042		TRBV31	TRBJ2-5	CAWSLD_GGIDTQYF	76	0.00108533		TRBV12-1	TRBJ1-2	CASSAQGANSDYTF	73	0.0011774		TRBV5	TRBJ1-1	CASSQDKTGVTEVLF	96	0.00118547
TRBV17	TRBJ2-1	CASSRADYAEQF	901	0.0122124		TRBV17	TRBJ2-7	CASSSDWGYEQYF	293	0.00383119		TRBV31	TRBJ2-1	CAWWTGGAEQF	76	0.00108533		TRBV5	TRBJ2-5	CASGQDWGPQDTQYF	72	0.00116127		TRBV26	TRBJ1-2	CASSDEGGANSDYTF	96	0.00118547
TRBV3	TRBJ1-1	CASRSEVF	884	0.011982		TRBV3	TRBJ2-7	CASSLGRDTSYEQYF	292	0.00381811		TRBV1	TRBJ2-7	CTRSAGLGGREQYF	76	0.00108533		TRBV1	TRBJ2-4	CSADRLGVSQNTLHF	72	0.00116127		TRBV1	TRBJ2-5	CSAVDRGPDTQYF	96	0.00118547
TRBV3	TRBJ2-5	CASSFGWGQDTQYF	881	0.0119413		TRBV17	TRBJ2-1	CASSRESRNYAEQF	289	0.00377889		TRBV1	TRBJ2-7	CSAEGQGDEQYF	76	0.00108533		TRBV1	TRBJ1-1	CSADIANTEVF	72	0.00116127		TRBV1	TRBJ2-4	CSGDNSQTTLYF	96	0.00118547
TRBV3	TRBJ2-7	CASSLLHYEQYF	875	0.01186		TRBV1	TRBJ2-4	CSAGLGEQNILYF	288	0.00376581		TRBV1	TRBJ2-3	CSAEGGGPSAETLHF	76	0.00108533		TRBV13-2	TRBJ2-5	CASSLGLGGYQDTQYF	72	0.00116127		TRBV1	TRBJ2-3	CSAPTGGGGAEALYF	96	0.00118547
TRBV1	TRBJ2-3	CSERTESAETLYF	873	0.0118329		TRBV1	TRBJ2-7	CSAGDRGCEQYF	287	0.00375274		TRBV1	TRBJ2-1	CSAGTGGVNYAEQF	76	0.00108533		TRBV13-2	TRBJ2-1	CAWTWGVNYAEQF	72	0.00116127		TRBV1	TRBJ1-4	CMALPNERLF	96	0.00118547
TRBV3	TRBJ2-1	CASSLGWGGYAEQF	872	0.0118193		TRBV17	TRBJ2-7	CASSPGLGGSYEQYF	285	0.00372658		TRBV1	TRBJ1-4	CSPQGISNDRLF	76	0.00108533		TRBV12-1	TRBJ2-7	CSPDKTYEQYF	72	0.00116127		TRBV1	TRBJ1-1	CSAEGAAEVF	96	0.00118547
TRBV3	TRBJ2-7	CASSLLGGSYEQYF	870	0.0117922		TRBV3	TRBJ2-1	CASRGGGYAEQF	284	0.00371351		TRBV1	TRBJ1-4	CSGDGISNERLF	76	0.00108533		TRBV12-1	TRBJ2-7	CASSGTGGEQYF	72	0.00116127		TRBV15	TRBJ1-2	CASSFRTNPDYTF	96	0.00118547
TRBV14	TRBJ1-4	CASSRTGFSNERLF	867	0.0117516		TRBV1	TRBJ2-4	CSAGRGEQNTLYF	284	0.00371351		TRBV1	TRBJ1-3	CSPTGNTLYF	76	0.00108533		TRBV12-1	TRBJ1-4	CASSAGTGYERSF	72	0.00116127		TRBV14	TRBJ1-6	CASSGTGGAGSPLYF	96	0.00118547
TRBV29	TRBJ1-4	CASSSLTGISNERLF	865	0.0117245		TRBV20	TRBJ2-1	CGARELGVNYAEQF	283	0.00370043		TRBV1	TRBJ1-1	CTYSAAQGNTEVF	76	0.00108533		TRBV24	TRBJ1-2	CASSLYQTNSDYTF	71	0.00114514		TRBV13-3	TRBJ1-1	CASSVTGGEVF	96	0.00118547
TRBV29	TRBJ1-1	CASSLTGPSNTEAF	851	0.0115347		TRBV12-1	TRBJ1-3	CASSLEDRDSGNTLYF	283	0.00370043		TRBV13-2	TRBJ2-7	CASGDAQYERYF	76	0.00108533		TRBV1	TRBJ2-7	CSAGQTGGAYERYF	71	0.00114514		TRBV13-1	TRBJ1-3	CASSVGQGAGNTLYF	96	0.00118547
TRBV3	TRBJ2-7	CASSFSYEQYF	846	0.0114669		TRBV13-2	TRBJ1-4	CASGGAGVSNERLF	282	0.00368736		TRBV13-2	TRBJ1-4	CASGDAFGGISNEGLF	76	0.00108533		TRBV1	TRBJ2-3	CSVDRAGGAETLYF	71	0.00114514		TRBV13-1	TRBJ1-3	CASSAGQRAGNTLYF	96	0.00118547
TRBV3	TRBJ2-5	CASSPGLGGRDQDTQYF	844	0.0114398		TRBV17	TRBJ2-5	CASSRDGLGSQDTQYF	279	0.00364813		TRBV13-2	TRBJ1-2	CASSQGDSDYTF	76	0.00108533		TRBV1	TRBJ1-4	CSADPNNERLF	71	0.00114514		TRBV5	TRBJ1-1	CANMSQGRTLYCTCQGTENTEVF	95	0.00117312
TRBV3	TRBJ2-5	CASSLDQDTQYF	840	0.0113856		TRBV31	TRBJ1-2	CAWSGQDSDYTF	278	0.00363505		TRBV13-2	TRBJ1-1	CASGRGRDTEVF	76	0.00108533		TRBV17	TRBJ2-5	CASSRLRDTQYF	71	0.00114514		TRBV31	TRBJ1-5	CAPRDTNNQAPLF	95	0.00117312
TRBV14	TRBJ1-1	CASSFTGNTEVF	840	0.0113856		TRBV12-2	TRBJ1-3	CASSLEDRDSGNTLYF	278	0.00363505		TRBV13-2	TRBJ1-1	CASGDTGGSTEVF	76	0.00108533		TRBV13-3	TRBJ2-3	CAGSATSAETLYF	71	0.00114514		TRBV26	TRBJ1-2	CASGQGQTNSDYTF	95	0.00117312
TRBV3	TRBJ2-7	CASSPHWGGSSYEQYF	831	0.0112636		TRBV3	TRBJ2-1	CASSFQQGYAEQF	277	0.00362198		TRBV13-1	TRBJ2-7	CASSDMGYEQYF	76	0.00108533		TRBV13-3	TRBJ1-1	CASSVTGANTEVF	71	0.00114514		TRBV1	TRBJ2-1	CSAGHNNYAE_F	95	0.00117312
TRBV17	TRBJ2-2	CASSTYTGQLYF	828	0.0112229		TRBV5	TRBJ1-2	CASSQEPSNSDYTF	276	0.0036089		TRBV13-1	TRBJ1-4	CASGISNERLF	76	0.00108533		TRBV13-2	TRBJ2-4	CASSGTGVGNTLYF	71	0.00114514		TRBV5	TRBJ1-4	CASSLKTNSNTEVF	94	0.00116078
TRBV1	TRBJ1-6	CSAPGHFNSHNSPLYF	823	0.0111552		TRBV17	TRBJ1-1	CASSQGADTEVF	275	0.00359583		TRBV5	TRBJ1-2	CAGSQGDSDYTF	75	0.00107105		TRBV13-2	TRBJ2-4	CASGEGQFSQNTLYF	71	0.00114514		TRBV4	TRBJ2-3	CASSSDPGSAETLYF	94	0.00116078
TRBV13-2	TRBJ2-7	CASGDAGGGEQYF	819	0.011101		TRBV1	TRBJ2-4	CSALGGNTLYF	272	0.0035566		TRBV31	TRBJ2-4	CARSLVGGQNTLYF	75	0.00107105		TRBV13-2	TRBJ2-3	CASSWTASAETLYF	71	0.00114514		TRBV26	TRBJ2-4	CASSPGGRQNTLYF	94	0.00116078
TRBV13-2	TRBJ1-6	CASAPNSYNSPLYF	814	0.0110332		TRBV13-1	TRBJ1-6	CASSDNYNSPLYF	272	0.0035566		TRBV1	TRBJ2-5	CSADWGIQGTQYF	75	0.00107105		TRBV13-1	TRBJ1-5	CASRDKNNQAPLF	71	0.00114514		TRBV26	TRBJ2-1	CASSLDRIYAEQSF	94	0.00116078
TRBV1	TRBJ1-6	CSAPGHLNSYNSPLYF	810	0.010979		TRBV17	TRBJ2-7	CASSSWGGADEQYF	265	0.00346507		TRBV1	TRBJ2-4	CSAEGEKSQSTLYF	75	0.00107105		TRBV12-2	TRBJ1-2	CASSLGQNSDYTF	71	0.00114514		TRBV1	TRBJ2-7	CSADLGRNEQYF	94	0.00116078
TRBV3	TRBJ2-3	CASSLRGGARSAETLYF	809	0.0109654		TRBV1	TRBJ2-5	CSADGTLNQGTQYF	263	0.00343892		TRBV1	TRBJ2-2	CSAVRNSNTGQLYF	75	0.00107105		TRBV12-1	TRBJ2-3	CASSATSAETLYF	71	0.00114514		TRBV1	TRBJ2-5	CGAEGQDTQYF	94	0.00116078
TRBV1	TRBJ1-6	CGAPGHFNSYNSPLYF	803	0.0108841		TRBV5	TRBJ1-1	CASGQEGVGNTEVF	260	0.00339969		TRBV1	TRBJ2-2	CGAQGSTGQLYF	75	0.00107105		TRBV12-1	TRBJ1-4	CASSLGTGYERLF	71	0.00114514		TRBV1	TRBJ2-4	CSADGGQNTLYF	94	0.00116078
TRBV16	TRBJ1-1	CASSLDGRDTEVF	796	0.0107892		TRBV13-3	TRBJ2-7	CASRDASQGYEQYF	260	0.00339969		TRBV1	TRBJ1-4	CSAGGERLF	75	0.00107105		TRBV12-1	TRBJ1-4	CASSAGTGYEK_SF	71	0.00114514		TRBV1	TRBJ2-1	CSADEGNYAE_F	94	0.00116078
TRBV14	TRBJ2-4	CASRTGTGENTLYF	792	0.010735		TRBV13-1	TRBJ1-1	CASSDWDREVF	260	0.00339969		TRBV1	TRBJ1-1	CSAAGGNTEVF	75	0.00107105		TRBV12-1	TRBJ1-4	CASPAGTGYERLF	71	0.00114514		TRBV1	TRBJ1-1	CRGSGGVTEVF	94	0.00116078
TRBV17	TRBJ2-1	CASSWANYAEQF	783	0.010613		TRBV17	TRBJ1-1	CASRGQGAEVF	257	0.00336046		TRBV16	TRBJ1-1	CASSLDAGANTEAF	75	0.00107105		TRBV1	TRBJ2-4	CSADRLGVSRNTLYF	70	0.00112901		TRBV15	TRBJ1-1	CASSQDKTGVTEVF	94	0.00116078
TRBV16	TRBJ2-3	CASSLVLGRLGAETLYF	776	0.0105181		TRBV16	TRBJ2-2	CASSLTGGNTGQLYF	257	0.00336046		TRBV13-2	TRBJ2-7	CASGESLGREQYF	75	0.00107105		TRBV1	TRBJ2-2	CSADANTGQLYF	70	0.00112901		TRBV14	TRBJ1-6	CASSFGAGGAGSPLYF	94	0.00116078
TRBV14	TRBJ2-1	CASSRDWGGYAEQF	767	0.0103961		TRBV12-1	TRBJ1-5	CASSRRTGAAQAPLF	257	0.00336046		TRBV13-2	TRBJ2-3	CASSPSLGGRSAETLYF	75	0.00107105		TRBV1	TRBJ2-1	CTRSDWGYYAEQF	70	0.00112901		TRBV13-1	TRBJ2-3	CASSGTEETLYF	94	0.00116078
TRBV3	TRBJ2-4	CASSSTGFQNTLYF	765	0.010369		TRBV24	TRBJ2-1	CASSHAGRAEQF	256	0.00334739		TRBV13-2	TRBJ2-1	CASGDGTRGAEQF	75	0.00107105		TRBV1	TRBJ1-4	CSAYANNERLF	70	0.00112901		TRBV13-1	TRBJ1-1	CASRQINTEVF	94	0.00116078
TRBV29	TRBJ1-1	CASSLTGPPNTEVF	763	0.0103419		TRBV1	TRBJ2-4	CTSSAGLGEQNTLYF	252	0.00329508		TRBV13-2	TRBJ1-3	CASGRQGDFGNTPYF	75	0.00107105		TRBV1	TRBJ1-1	CTYSADGRNTEVF	70	0.00112901		TRBV5	TRBJ2-1	CAGSQARDRYAEQF	93	0.00114843
TRBV15	TRBJ1-1	CASSPDTNTEVF	751	0.0101793		TRBV1	TRBJ2-4	CRAGLGEQNTLYF	252	0.00329508		TRBV13-2	TRBJ1-1	CAGGPGQGATEVF	75	0.00107105		TRBV15	TRBJ2-1	CASSLRDWGYAEQF	70	0.00112901		TRBV4	TRBJ1-4	CASSLTVNERLF	93	0.00114843
TRBV29	TRBJ1-4	CASRGGISNERLF	749	0.0101522		TRBV15	TRBJ2-7	CASSSAHEQYF	252	0.00329508		TRBV5	TRBJ2-5	CASSQAVNQGTQYF	74	0.00105677		TRBV15	TRBJ1-4	CASSLSHFSNERSF	70	0.00112901		TRBV26	TRBJ2-5	CSLEIQSSEAGDSTLYLRASSLNRDTQYF	93	0.00114843
TRBV14	TRBJ2-2	CASSLTGSGQLYF	746	0.0101115		TRBV13-3	TRBJ2-7	CASSDASQGYKQYF	252	0.00329508		TRBV5	TRBJ1-2	CASSQGGSDYTF	74	0.00105677		TRBV15	TRBJ1-1	CASSLRGDGNTEVLF	70	0.00112901		TRBV26	TRBJ2-1	CSLEIQSSEAGDSALYLRASSRDYAEQF	93	0.00114843
TRBV3	TRBJ2-7	CASSQTGGAF	739	0.0100166		TRBV13-2	TRBJ2-1	CASSDNYAEQF	252	0.00329508		TRBV5	TRBJ1-1	CASSQGQGANTEAF	74	0.00105677		TRBV14	TRBJ2-3	CASSYGAETLYF	70	0.00112901		TRBV26	TRBJ2-1	CAGSLDRIYAEQF	93	0.00114843
TRBV3	TRBJ2-5	CASSLGGSQDTQYF	737	0.00998951		TRBV17	TRBJ1-4	CASSRDPQGVSNERLF	250	0.00326893		TRBV31	TRBJ2-3	CAWSHISQILENSQSGS_AKIQRF	74	0.00105677		TRBV13-2	TRBJ2-4	CASSGGNTLYF	70	0.00112901		TRBV26	TRBJ1-3	CASSAGQGAGNTLYF	93	0.00114843
TRBV3	TRBJ2-1	CASRGTGGYAEQF	731	0.00990818		TRBV26	TRBJ2-7	CASSSGQGAQDEQYF	248	0.00324278		TRBV1	TRBJ2-7	CTRSAGGWQYF	74	0.00105677		TRBV13-2	TRBJ2-4	CASGGAGLGGRQNTLYF	70	0.00112901		TRBV26	TRBJ1-1	CASSPTGSNTEAF	93	0.00114843
TRBV13-2	TRBJ1-4	CASRDSSNERLF	720	0.00975908		TRBV13-2	TRBJ1-3	CASGGGAGNTLYF	247	0.00322971		TRBV1	TRBJ2-7	CSARDWGDEQHF	74	0.00105677		TRBV13-2	TRBJ1-1	CASTNGQGPFF	70	0.00112901		TRBV1	TRBJ2-7	CTYSADRFSYEQYF	93	0.00114843
TRBV1	TRBJ2-7	CSARLGWEQCF	718	0.00973197		TRBV17	TRBJ1-4	CASSRGTTNERLF	243	0.0031774		TRBV1	TRBJ1-6	CSADRDSYNSLLYF	74	0.00105677		TRBV13-1	TRBJ2-1	CASGVGTGDNYAEQF	70	0.00112901		TRBV1	TRBJ2-2	CSVGQNTGRLYF	93	0.00114843
TRBV3	TRBJ1-1	CASSPGTANTEVF	716	0.00970487		TRBV15	TRBJ2-4	CASGLGGRNTLYF	241	0.00315125		TRBV1	TRBJ1-3	CGAGDRFYGNTLYF	74	0.00105677		TRBV13-1	TRBJ1-6	CASSDAGDSPL-F	70	0.00112901		TRBV1	TRBJ1-5	CSAEQEAPLF	93	0.00114843
TRBV17	TRBJ2-3	CASSRDGGETLYF	700	0.009488		TRBV14	TRBJ2-7	CASSFLTGRDEQYF	239	0.0031251		TRBV1	TRBJ1-1	CSTAQGNTEVF	74	0.00105677		TRBV12-1	TRBJ2-7	CASSRDETYEQYF	70	0.00112901		TRBV1	TRBJ1-5	CSAAQEAPLF	93	0.00114843
TRBV1	TRBJ1-6	CSAPGRFNSYNSPLYF	697	0.00944733		TRBV1	TRBJ2-7	CSAEGGSSYEQYF	238	0.00311202		TRBV1	TRBJ1-1	CSAGGSTEVF	74	0.00105677		TRBV12-1	TRBJ1-2	CASSLGTTSSDYTF	70	0.00112901		TRBV1	TRBJ1-4	CSAGQPSNERLF	93	0.00114843
TRBV1	TRBJ2-3	CTRSADQGAGSAETLYF	686	0.00929824		TRBV1	TRBJ2-3	CSVGTGSSAETLHF	237	0.00309895		TRBV13-1	TRBJ2-5	CASSQGSQDTQYF	74	0.00105677		TRBV31	TRBJ2-5	CAWSGGDRDTQYF	69	0.00111289		TRBV1	TRBJ1-3	CGADHWNSGNTLYF	93	0.00114843
TRBV29	TRBJ1-1	CASSLTGPSSTEVF	683	0.00925758		TRBV13-2	TRBJ2-4	CTCSAGLGEQNTLYF	234	0.00305972		TRBV5	TRBJ2-7	CASRPGTGDYEQYF	73	0.00104249		TRBV26	TRBJ1-1	CASSGTRYTEVF	69	0.00111289		TRBV1	TRBJ1-1	CSTEGATEVF	93	0.00114843
TRBV13-3	TRBJ2-4	CASSDSRIQSTLYF	679	0.00920336		TRBV1	TRBJ2-5	CSRGLGGR_DTQYF	233	0.00304665		TRBV5	TRBJ2-5	CASSQAANQDTQYF	73	0.00104249		TRBV1	TRBJ2-4	CSADQDWGGWQNTSYF	69	0.00111289		TRBV1	TRBJ1-1	CSAAQNTEVLF	93	0.00114843
TRBV20	TRBJ2-3	CGARDVQGAGAETLYF	668	0.00905426		TRBV5	TRBJ1-6	CSHLFNNSYNSPLYF	232	0.00303357		TRBV5	TRBJ1-5	CASSQVSQNNQAQHF	73	0.00104249		TRBV1	TRBJ2-4	CSADQDWGGWQNALYF	69	0.00111289		TRBV13-3	TRBJ2-5	CASSLTGGDTQYF	93	0.00114843
TRBV29	TRBJ1-1	CAGSLTGPSNTEVF	666	0.00902715		TRBV1	TRBJ2-3	CSVGTGSSAEALYF	232	0.00303357		TRBV5	TRBJ1-3	CASSGGLDTLYF	73	0.00104249		TRBV1	TRBJ2-4	CAGHQSTLYF	69	0.00111289		TRBV13-1	TRBJ2-7	CASSDRTGGAYEQYF	93	0.00114843
TRBV5	TRBJ1-2	CASSHKQGANSDYTF	643	0.0087154		TRBV20	TRBJ1-2	CGASHTNSDYTF	228	0.00298127		TRBV5	TRBJ1-1	CASSQGRGANTEVF	73	0.00104249		TRBV1	TRBJ1-4	CSADTQGFNERLLF	69	0.00111289		TRBV4	TRBJ1-3	CASSQDNSGNTLYF	92	0.00113608
TRBV1	TRBJ1-6	CSAPGHFNPYNSPLYF	636	0.00862052		TRBV13-2	TRBJ2-1	CASSFRQGYAEQF	228	0.00298127		TRBV31	TRBJ1-5	CAWSPGGMNQARHF	73	0.00104249		TRBV1	TRBJ1-1	CSADRAGGAEVF	69	0.00111289		TRBV26	TRBJ2-4	CASSLRGRQNTLYF	92	0.00113608
TRBV29	TRBJ1-1	CASGLTGPSNTEVF	630	0.0085392		TRBV20	TRBJ1-3	CGAREGAGNTLYF	227	0.00296819		TRBV1	TRBJ2-7	CSARDWGDE_YF	73	0.00104249		TRBV16	TRBJ2-1	CASSLEGTAYAGQF	69	0.00111289		TRBV1	TRBJ2-1	CSARDSNYAERF	92	0.00113608
TRBV3	TRBJ2-2	CASSLFRGRTGQLYF	629	0.00852564		TRBV26	TRBJ2-5	CASSRDNNQDTQYF	226	0.00295512		TRBV1	TRBJ2-7	CSADRGSYEQYF	73	0.00104249		TRBV15	TRBJ2-1	CASSPWDWGYAEQVF	69	0.00111289		TRBV1	TRBJ1-5	CSVDQEAPLF	92	0.00113608
TRBV17	TRBJ2-7	CASTGTGGYEQYF	627	0.00849854		TRBV15	TRBJ2-2	CASSLGNTGQLYF	226	0.00295512		TRBV1	TRBJ2-4	CSADPTKTSQSTLYF	73	0.00104249		TRBV15	TRBJ2-1	CASRSTGGYNYAKQF	69	0.00111289		TRBV13-3	TRBJ1-1	CASSGTPTEVF	92	0.00113608
TRBV16	TRBJ2-1	CASSLTWGAKYAEQF	627	0.00849854		TRBV1	TRBJ1-1	CSAERGDTEVF	224	0.00292896		TRBV1	TRBJ2-4	CSADLSQNTSYF	73	0.00104249		TRBV15	TRBJ2-1	CASRSTGGYNHAEQF	69	0.00111289		TRBV13-2	TRBJ2-3	CASGDGRVGAETLYF	92	0.00113608
TRBV17	TRBJ2-4	CASGTGGSQNTLYF	624	0.00845787		TRBV13-3	TRBJ2-7	CASNDASQGYEQYF	224	0.00292896		TRBV1	TRBJ1-6	CTRSAAGNSPLYF	73	0.00104249		TRBV15	TRBJ1-6	CASSDAGDSPLYF	69	0.00111289		TRBV13-2	TRBJ1-6	CASSEKGWNSPLYF	92	0.00113608
TRBV29	TRBJ1-1	CASSLAGPSNTEVF	619	0.0083901		TRBV20	TRBJ2-3	CGASWGAETLYF	221	0.00288974		TRBV1	TRBJ1-1	CSVGRGNTEVF	73	0.00104249		TRBV15	TRBJ1-4	CASSLDPGTNERLF	69	0.00111289		TRBV13-1	TRBJ2-5	CASSDRDQDTQYF	92	0.00113608
TRBV17	TRBJ1-2	CASSSRNSDYTF	619	0.0083901		TRBV13-3	TRBJ2-7	CASSDALQGYEQYF	220	0.00287666		TRBV1	TRBJ1-1	CSAGGQADTEVF	73	0.00104249		TRBV13-3	TRBJ2-1	CASSEGNNYAEQSF	69	0.00111289		TRBV5	TRBJ2-1	CASSQGGREQCF	91	0.00112373
TRBV3	TRBJ1-6	CASSLGRGSPLYF	617	0.00836299		TRBV5	TRBJ1-4	CASSQEQISNEGLF	219	0.00286359		TRBV1	TRBJ1-1	CSAGGDTEVF	73	0.00104249		TRBV13-2	TRBJ2-7	CASGDTRAGEQYF	69	0.00111289		TRBV5	TRBJ1-1	CASSQGATNTEVF	91	0.00112373
TRBV3	TRBJ1-6	CASSLGTEYNSPLYF	614	0.00832233		TRBV15	TRBJ2-1	CASSFRQGYAEQF	217	0.00283743		TRBV1	TRBJ1-1	CSAEGRDTEVF	73	0.00104249		TRBV13-2	TRBJ2-7	CAGGDAGGVQYF	69	0.00111289		TRBV31	TRBJ2-1	CTWSLTGGVYAEQF	91	0.00112373
TRBV3	TRBJ2-4	CASSLRGQNTLYF	605	0.00820034		TRBV1	TRBJ2-4	CSAGLGEQHTLYF	215	0.00281128		TRBV13-2	TRBJ2-7	CASGERQGYEQYF	73	0.00104249		TRBV13-2	TRBJ1-2	CASSEGVNSDYTF	69	0.00111289		TRBV26	TRBJ2-1	CASSRDYAEQSF	91	0.00112373
TRBV17	TRBJ2-7	CASSHWGTYEQYF	602	0.00815968		TRBV13-1	TRBJ1-5	CASSGRGRAPLF	215	0.00281128		TRBV13-2	TRBJ2-5	CASGGTGEKDTQYF	73	0.00104249		TRBV13-2	TRBJ1-1	CASSPLDRADTEVF	69	0.00111289		TRBV1	TRBJ2-2	CSVGQNTRQLYF	91	0.00112373
TRBV1	TRBJ1-6	CSAPGHSNSYNSPLYF	595	0.0080648		TRBV20	TRBJ2-7	CGARRQGAGEQYF	214	0.00279821		TRBV13-2	TRBJ2-2	CASGANTGQPYF	73	0.00104249		TRBV13-1	TRBJ2-7	CVSSDEGDEQYF	69	0.00111289		TRBV1	TRBJ2-1	CSADTGAGQF	91	0.00112373
TRBV17	TRBJ2-1	CASRPGQGAAEQF	589	0.00798347		TRBV1	TRBJ2-4	CSAETESQSTLYF	212	0.00277206		TRBV13-1	TRBJ2-4	CASSEAGWNTLYF	73	0.00104249		TRBV13-1	TRBJ1-6	CASSDAGDSPLNF	69	0.00111289		TRBV1	TRBJ2-1	CSADTGAEQLF	91	0.00112373
TRBV3	TRBJ2-2	CASSPDWEGQLYF	588	0.00796992		TRBV13-2	TRBJ2-3	CASSEGLGGAETLYF	212	0.00277206		TRBV13-1	TRBJ2-2	CASRRANTGQLYF	73	0.00104249		TRBV13-1	TRBJ1-2	CASGDLSTNSDYTF	69	0.00111289		TRBV1	TRBJ1-3	CSADHWNPGNTLYF	91	0.00112373
TRBV20	TRBJ1-4	CGARDKISNERLF	584	0.0079157		TRBV13-3	TRBJ2-7	CASSDATQGYEQYF	211	0.00275898		TRBV5	TRBJ2-2	CASSPDWGGTGQLYF	72	0.00102821		TRBV12-1	TRBJ2-7	CAGSRDKTYEQYF	69	0.00111289		TRBV15	TRBJ2-1	CASSQGLGGRGAEQF	91	0.00112373
TRBV14	TRBJ2-1	CASSQGLGGAHYAEQF	579	0.00784793		TRBV5	TRBJ2-7	CASSQTGGKVYEQYF	210	0.0027459		TRBV5	TRBJ2-1	CASSPDRGNAEQF	72	0.00102821		TRBV12-1	TRBJ2-4	CASGDAGLGGRQNTLYF	69	0.00111289		TRBV14	TRBJ2-2	CASSPQGRNTGQLYF	91	0.00112373
TRBV13-3	TRBJ2-1	CASSPGTGDYAEQF	571	0.0077395		TRBV1	TRBJ2-3	CSVGAGSSAETLYF	209	0.00273283		TRBV5	TRBJ1-1	CASSPGTGANTGVF	72	0.00102821		TRBV20	TRBJ1-2	CDARAVSNSDYTF	68	0.00109676		TRBV13-3	TRBJ1-5	CAGSEPTNNNQAPLF	91	0.00112373
TRBV1	TRBJ1-6	CSAPGHFNSYNSPLHF	570	0.00772594		TRBV20	TRBJ2-3	CGARDSSAETLYF	208	0.00271975		TRBV4	TRBJ2-7	CASSPRRDWGYEQYF	72	0.00102821		TRBV13-2	TRBJ1-2	CASSLLPGANSDYTF	68	0.00109676		TRBV13-3	TRBJ1-3	CASSWGGSGNTLYF	91	0.00112373
TRBV3	TRBJ1-5	CASSLRTKNNQAPLF	560	0.0075904		TRBV12-1	TRBJ2-7	CASSDASQGYEQYF	208	0.00271975		TRBV31	TRBJ2-2	CAWSLPRGPNTGQLYF	72	0.00102821		TRBV13-1	TRBJ2-1	CASGDWGADYAEQF	68	0.00109676		TRBV13-2	TRBJ1-1	CASGGPGQGPNTEVF	91	0.00112373
TRBV13-2	TRBJ2-4	CASGGYRGGQNTLYF	560	0.0075904		TRBV1	TRBJ1-1	CSAERGSTEVF	207	0.00270668		TRBV30	TRBJ2-5	CSSRDRDWGDEQYF	72	0.00102821		TRBV12-1	TRBJ2-7	CASSLDKSYEQDF	68	0.00109676		TRBV13-1	TRBJ2-1	CASSDDRTGPSEQF	91	0.00112373
TRBV17	TRBJ2-3	CASSRDQGASAETLYF	559	0.00757684		TRBV1	TRBJ2-4	CSAGLGAQNTLYF	203	0.00265437		TRBV1	TRBJ2-5	CTRSAASLGGRDTQYF	72	0.00102821		TRBV12-1	TRBJ2-5	CASSRLRDTQYF	68	0.00109676		TRBV13-1	TRBJ2-1	CASSDDRTGLSE_F	91	0.00112373
TRBV3	TRBJ1-1	CASSLDGEENTEVF	557	0.00754974		TRBV13-2	TRBJ1-3	CASGQGAGNTLYF	203	0.00265437		TRBV1	TRBJ2-5	CGAGNQDTQYF	72	0.00102821		TRBV12-1	TRBJ1-2	CASSLGQNSDYTF	68	0.00109676		TRBV13-1	TRBJ1-1	CAGSDVGEVF	91	0.00112373
TRBV5	TRBJ2-3	CASSQDLTGAGAETLYF	550	0.00745486		TRBV12-1	TRBJ2-2	CASSLGQGDTGQLNF	202	0.0026413		TRBV1	TRBJ2-4	CSAEQGRQNTLYF	72	0.00102821		TRBV5	TRBJ1-4	CANMSQGRTLYCTCSADANNERLF	67	0.00108063		TRBV5	TRBJ2-4	CASSPGQGAGGQNTLYF	90	0.00111138
TRBV20	TRBJ1-3	CGAIQGNGNTLYF	542	0.00734642		TRBV3	TRBJ1-6	CASSHPGQRYNSPLYF	201	0.00262822		TRBV1	TRBJ2-4	CSADGDWGSQNTSYF	72	0.00102821		TRBV1	TRBJ2-7	CSAVGGRYEQYF	67	0.00108063		TRBV31	TRBJ1-1	CASSLKTNSNTEVF	90	0.00111138
TRBV17	TRBJ2-4	CASSRRQGKNTLYF	539	0.00730576		TRBV24	TRBJ2-5	CASSRDNNQDTQYF	201	0.00262822		TRBV1	TRBJ2-2	CSAVRDSNTRQLYF	72	0.00102821		TRBV1	TRBJ2-7	CSAEREQYF	67	0.00108063		TRBV30	TRBJ1-4	CSSTAAFPNERLF	90	0.00111138
TRBV20	TRBJ2-7	CGARVRTGGYEQYF	531	0.00719732		TRBV3	TRBJ2-7	CASSDASQGYEQYF	200	0.00261515		TRBV1	TRBJ2-2	CSAVQNSNTGQLYF	72	0.00102821		TRBV1	TRBJ1-4	CSAHANNERLF	67	0.00108063		TRBV26	TRBJ2-7	CASSPDWGGYEQYF	90	0.00111138
TRBV3	TRBJ2-5	CASSLAVNQDTQYF	530	0.00718377		TRBV20	TRBJ2-7	CGASGTGGYEQYF	200	0.00261515		TRBV1	TRBJ2-2	CSAGQYTGRLYF	72	0.00102821		TRBV1	TRBJ1-4	CSADTRGFNERLF	67	0.00108063		TRBV26	TRBJ2-4	CSLEIQSSEAGDSALYLRASSPRGRQNTLYF	90	0.00111138
TRBV29	TRBJ1-1	CASNLTGPSNTEVF	530	0.00718377		TRBV23	TRBJ2-4	CSSSQSRDTLYF	198	0.002589		TRBV1	TRBJ1-6	CSVDPTDNSPLYF	72	0.00102821		TRBV1	TRBJ1-1	CSGDKNTEAF	67	0.00108063		TRBV26	TRBJ1-2	CAGSLGTANSDYTF	90	0.00111138
TRBV29	TRBJ2-5	CAGSSGTGVQDTQYF	517	0.00700756		TRBV20	TRBJ1-2	CGADRGRNSDYTF	198	0.002589		TRBV1	TRBJ1-6	CSATGSGYNSPLYF	72	0.00102821		TRBV15	TRBJ2-4	CASSLSQNTLYF	67	0.00108063		TRBV1	TRBJ2-7	CSATGGAHEQYF	90	0.00111138
TRBV20	TRBJ2-7	CGASLGAYEQYF	517	0.00700756		TRBV1	TRBJ2-4	CSAGLGEQNTVYF	198	0.002589		TRBV1	TRBJ1-3	CSTERGGNTLYF	72	0.00102821		TRBV15	TRBJ2-1	CASGTGVYAEQF	67	0.00108063		TRBV1	TRBJ2-5	CSLRG_DTQYF	90	0.00111138
TRBV20	TRBJ2-5	CGARDGGGTQYF	517	0.00700756		TRBV13-3	TRBJ2-7	CASSDASQGYEPYF	198	0.002589		TRBV13-3	TRBJ1-2	CASSGRNSDYTF	72	0.00102821		TRBV13-3	TRBJ2-5	CASSQTGVQDTQYF	67	0.00108063		TRBV1	TRBJ2-5	CGPGLGGQDTQYF	90	0.00111138
TRBV1	TRBJ1-6	CSAPGHFNSYNPPLYF	514	0.0069669		TRBV26	TRBJ2-5	CASSHPGQGQDAQYF	197	0.00257592		TRBV13-2	TRBJ1-1	CASGEPGGSTEVF	72	0.00102821		TRBV13-1	TRBJ1-2	CTSSDALSGQGGSDYTF	67	0.00108063		TRBV1	TRBJ2-4	CSADSRGQNTLYF	90	0.00111138
TRBV29	TRBJ1-1	CASSLTGPSDTEVF	513	0.00695335		TRBV3	TRBJ2-1	CASSLRGNYAEQLF	196	0.00256284		TRBV5	TRBJ2-7	CASSQGLGASYEQYF	71	0.00101392		TRBV12-1	TRBJ2-7	CASSLDKSYEQ_F	67	0.00108063		TRBV1	TRBJ2-4	CGAGDSQNTLYF	90	0.00111138
TRBV1	TRBJ1-1	CTRSAGTTNTEVF	493	0.00668226		TRBV13-3	TRBJ2-1	CASSFRQGYAEQF	196	0.00256284		TRBV5	TRBJ2-7	CAGSQGLGVSYEQYF	71	0.00101392		TRBV12-1	TRBJ1-4	CASTAGTGYERLF	67	0.00108063		TRBV1	TRBJ1-3	CSTGSSLYF	90	0.00111138
TRBV1	TRBJ1-6	CSAPGHFNSYSSPLYF	488	0.00661449		TRBV13-2	TRBJ2-7	CASGDASQGYEQYF	196	0.00256284		TRBV5	TRBJ2-1	CASSPDWGNAEQLF	71	0.00101392		TRBV12-1	TRBJ1-4	CANMSQGRTLYCTCSADANNERLF	67	0.00108063		TRBV1	TRBJ1-3	CSADYWNSGNTLYF	90	0.00111138
TRBV29	TRBJ1-3	CASNRDRGGNTLYF	480	0.00650606		TRBV31	TRBJ1-1	CAWRLQNTDVF	195	0.00254977		TRBV5	TRBJ1-1	CASSQGQGANTEVLF	71	0.00101392		TRBV29	TRBJ2-1	CASSLGANYAEQLF	66	0.0010645		TRBV1	TRBJ1-1	CTRRVSGGVTEVF	90	0.00111138
TRBV12-1	TRBJ2-3	CASSPSGQTSAEALYF	475	0.00643828		TRBV26	TRBJ2-7	CVSSRDRSYEQYF	195	0.00254977		TRBV31	TRBJ2-4	CAWSLAGGGYTLYF	71	0.00101392		TRBV26	TRBJ1-2	CASSLLPGTNSDYTF	66	0.0010645		TRBV13-3	TRBJ2-7	CAGSPDWGGYEQYF	90	0.00111138
TRBV1	TRBJ2-3	CSASAETLYF	473	0.00641118		TRBV13-2	TRBJ1-5	CASSDRGRAPLF	195	0.00254977		TRBV30	TRBJ2-7	CSSRDRGSYEQYF	71	0.00101392		TRBV15	TRBJ2-1	CASSSGGALAEQF	66	0.0010645		TRBV13-3	TRBJ2-1	CASSGGGNYAGQF	90	0.00111138
TRBV15	TRBJ2-7	CASRTGTGGALVQYF	472	0.00639762		TRBV13-1	TRBJ1-1	CASSDVGATEVF	195	0.00254977		TRBV1	TRBJ2-7	CTRSAVSGGVYEQYF	71	0.00101392		TRBV15	TRBJ2-1	CASSEGNNYAEQF	66	0.0010645		TRBV13-3	TRBJ1-6	CASSRQDYNSPLYF	90	0.00111138
TRBV13-2	TRBJ1-6	CASSDGTNNSPLYF	471	0.00638407		TRBV1	TRBJ2-4	CSAGLGEHNTLYF	194	0.00253669		TRBV1	TRBJ2-5	CSATKDTLYF	71	0.00101392		TRBV15	TRBJ1-6	CASSLAGYNSPLYF	66	0.0010645		TRBV13-2	TRBJ2-1	CASSGGQGNYAEQF	90	0.00111138
TRBV17	TRBJ2-1	CASSRGTDAEQF	465	0.00630274		TRBV1	TRBJ2-1	CTRSARQGGYAEQF	194	0.00253669		TRBV1	TRBJ2-1	CSADGLGGYAERF	71	0.00101392		TRBV15	TRBJ1-4	CASSLSHFPNERLF	66	0.0010645		TRBV13-2	TRBJ1-1	CASGVPGQGPNTEAF	90	0.00111138
TRBV13-3	TRBJ2-4	CASSDWDSQSTLYF	462	0.00626208		TRBV12-1	TRBJ1-3	CASSRGSSGNTLYF	194	0.00253669		TRBV1	TRBJ1-4	CSPQGISNEKLF	71	0.00101392		TRBV13-3	TRBJ2-7	CASSDAQ_RVASFTLQSSYEQYF	66	0.0010645		TRBV5	TRBJ2-3	CASSQGGGAVAETLYF	89	0.00109903
TRBV17	TRBJ1-2	CASSTGGDSDYTF	460	0.00623497		TRBV13-3	TRBJ2-7	CASSDAS_GYEQYF	193	0.00252362		TRBV1	TRBJ1-4	CSAPGQPPSNERLF	71	0.00101392		TRBV13-3	TRBJ2-7	CASGDAGGVQYF	66	0.0010645		TRBV30	TRBJ1-4	CSSTAAFSNERLLF	89	0.00109903
TRBV13-2	TRBJ1-6	CASGDAGGRGNSPLYF	457	0.00619431		TRBV17	TRBJ1-3	CASSRMGSGNTLYF	191	0.00249746		TRBV1	TRBJ1-4	CSADQGAGNERLF	71	0.00101392		TRBV13-2	TRBJ2-7	CASSSQGEQYF	66	0.0010645		TRBV2	TRBJ2-7	CASSQGAATEQYF	89	0.00109903
TRBV15	TRBJ1-2	CASSLQGEDSDYTF	456	0.00618075		TRBV1	TRBJ2-7	CSPGQGWEQYF	190	0.00248439		TRBV1	TRBJ1-2	CSADRGTNSDHTF	71	0.00101392		TRBV13-2	TRBJ2-5	CASSPTNQDTQYF	66	0.0010645		TRBV26	TRBJ2-4	CASGPRGRQNTLYF	89	0.00109903
TRBV13-1	TRBJ2-7	CASSDAGGSS_EQYF	452	0.00612654		TRBV5	TRBJ2-3	CASSLAHAETLYF	188	0.00245824		TRBV1	TRBJ1-1	CSAGRGVF	71	0.00101392		TRBV13-2	TRBJ1-1	CASRGQGAEVF	66	0.0010645		TRBV26	TRBJ1-2	CASSLRTNSDYTF	89	0.00109903
TRBV15	TRBJ2-1	CVSSLPGNYAEQF	449	0.00608587		TRBV13-3	TRBJ2-7	CARSDASQGYEQYF	188	0.00245824		TRBV17	TRBJ1-5	CASSRPGQGNNQAPLF	71	0.00101392		TRBV12-1	TRBJ2-7	CASSPDKPYEQYF	66	0.0010645		TRBV26	TRBJ1-2	CAGSQGQTNSDYTF	89	0.00109903
TRBV13-2	TRBJ2-4	CASSEPGLGENTLYF	448	0.00607232		TRBV5	TRBJ1-1	CASSQEGVGDTEVF	187	0.00244516		TRBV13-2	TRBJ2-7	CASGVEGGREQYF	71	0.00101392		TRBV12-1	TRBJ2-5	CASSPGTGVDTQYF	66	0.0010645		TRBV1	TRBJ2-5	CSASRDPGGDTQCF	89	0.00109903
TRBV29	TRBJ1-1	CDSSLTGPSNTEVF	444	0.0060181		TRBV13-2	TRBJ1-3	CASGRTGGSGNTLYF	187	0.00244516		TRBV13-2	TRBJ2-3	CASGDQLGGGAETLYF	71	0.00101392		TRBV12-1	TRBJ1-4	CASSAGTGCERLF	66	0.0010645		TRBV1	TRBJ2-4	CTRKSQNTLYF	89	0.00109903
TRBV29	TRBJ1-1	CASSLTGPSNTEVSF	444	0.0060181		TRBV15	TRBJ2-7	CASSDASQGYEQYF	185	0.00241901		TRBV5	TRBJ2-7	CASSQDPGGARSSYEQYF	70	0.000999644		TRBV12-1	TRBJ1-2	CASSLLPGANSDYTF	66	0.0010645		TRBV1	TRBJ2-4	CSAGDSRNTLYF	89	0.00109903
TRBV13-2	TRBJ2-7	CASGDEGGTDEQYF	438	0.00593678		TRBV1	TRBJ2-7	CGADPDTSSYEQYF	184	0.00240593		TRBV5	TRBJ2-7	CASSDVGYEQYF	70	0.000999644		TRBV3	TRBJ2-7	CASSLDWAGSHEQYF	65	0.00104837		TRBV1	TRBJ2-4	CSADRGQDTLYF	89	0.00109903
TRBV17	TRBJ2-3	CASSRGASAETLYF	436	0.00590967		TRBV1	TRBJ2-4	CSAGLGASQNTLYF	183	0.00239286		TRBV5	TRBJ2-3	CASSQGLGGSAETPYF	70	0.000999644		TRBV3	TRBJ1-6	CASSDAGDSPLYF	65	0.00104837		TRBV1	TRBJ2-3	CTRSVGSSAETLYF	89	0.00109903
TRBV17	TRBJ2-2	CASSPDWASNTGQLYF	435	0.00589611		TRBV31	TRBJ1-2	CAWCSRDRSYSDYTF	182	0.00237978		TRBV5	TRBJ2-1	CASSLGLGGYAEQF	70	0.000999644		TRBV29	TRBJ2-7	CASSPDKTYEQYF	65	0.00104837		TRBV1	TRBJ2-3	CSAAGGGYF	89	0.00109903
TRBV17	TRBJ2-1	CASSRAYYAEQF	433	0.005869		TRBV26	TRBJ2-5	CASSSGQGARDEQYF	181	0.00236671		TRBV5	TRBJ1-1	CASSQGLNTGVF	70	0.000999644		TRBV1	TRBJ2-5	CSAVNQDTRYF	65	0.00104837		TRBV1	TRBJ1-5	CSAGTGVNQTPLF	89	0.00109903
TRBV17	TRBJ2-3	CASSPTGGGAETLYF	425	0.00576057		TRBV15	TRBJ2-3	CASSLEGNSAETLYF	181	0.00236671		TRBV5	TRBJ1-1	CAGSQGQGANTEVF	70	0.000999644		TRBV1	TRBJ2-3	CSAGRPSAETLYF	65	0.00104837		TRBV1	TRBJ1-5	CSADLGAAPLF	89	0.00109903
TRBV23	TRBJ2-4	CSSSQSKNTLYF	419	0.00567924		TRBV15	TRBJ2-3	CASSFDRGTSAETLYF	180	0.00235363		TRBV1	TRBJ2-7	CSGGLPYEQYF	70	0.000999644		TRBV1	TRBJ2-3	CSADRVGGAETLYF	65	0.00104837		TRBV1	TRBJ1-3	CSADHWNSGNTPYF	89	0.00109903
TRBV26	TRBJ2-5	CASSDRGGQGTQYF	414	0.00561147		TRBV1	TRBJ2-4	CSAGLGEQNTMYF	179	0.00234056		TRBV1	TRBJ2-5	CSDPGGADQGTQYF	70	0.000999644		TRBV1	TRBJ1-3	CSADEGQGAGNTPYF	65	0.00104837		TRBV1	TRBJ1-3	CGATGVGGNTLYF	89	0.00109903
TRBV13-1	TRBJ1-1	CASSLTGPSNTEVF	413	0.00559792		TRBV1	TRBJ1-1	CSAGDAEVF	179	0.00234056		TRBV1	TRBJ2-4	CSAGLGTSQNTLYF	70	0.000999644		TRBV1	TRBJ1-1	CSEQGRDTEAF	65	0.00104837		TRBV1	TRBJ1-1	CSAAQNAEVF	89	0.00109903
TRBV17	TRBJ2-2	CASSSWANTGQLYF	412	0.00558436		TRBV26	TRBJ2-7	CASSLVRSSYEQYF	178	0.00232748		TRBV1	TRBJ2-3	CSTGQTSAETLYF	70	0.000999644		TRBV1	TRBJ1-1	CSAEGRNTEVF	65	0.00104837		TRBV13-3	TRBJ2-7	CASSGRSSYEQYF	89	0.00109903
TRBV13-2	TRBJ2-7	CASGERQSSYEQHF	407	0.00551659		TRBV20	TRBJ2-2	CGARGPGQLYF	178	0.00232748		TRBV1	TRBJ2-2	CTRSAVQDSNTGQLYF	70	0.000999644		TRBV1	TRBJ1-1	CSADRGGTTEVF	65	0.00104837		TRBV13-3	TRBJ2-3	CASSGTGETLYF	89	0.00109903
TRBV1	TRBJ1-1	CTYSASGQENTEVF	404	0.00547593		TRBV20	TRBJ2-4	CGASDWGRVHTLYF	177	0.0023144		TRBV1	TRBJ1-4	CSGDRISDERLF	70	0.000999644		TRBV15	TRBJ2-1	CASSLGQYNYAEQF	65	0.00104837		TRBV13-1	TRBJ1-2	CASSDADRNSGYTF	89	0.00109903
TRBV5	TRBJ2-3	CASSQGLTGASAETLYF	403	0.00546238		TRBV1	TRBJ2-2	CSAGSGRLYF	177	0.0023144		TRBV13-3	TRBJ2-1	CASSDRSYAEQF	70	0.000999644		TRBV14	TRBJ2-3	CASSFGGGASAETLYF	65	0.00104837		TRBV12-1	TRBJ2-7	CASSLLGQGGERYF	89	0.00109903
TRBV20	TRBJ2-7	CGARRQGGEQYF	402	0.00544882		TRBV13-2	TRBJ2-7	CASSDFSSYEQYF	177	0.0023144		TRBV13-2	TRBJ1-5	CASGRDRGDNQAPLF	70	0.000999644		TRBV13-3	TRBJ2-5	CASNRGDTQYF	65	0.00104837		TRBV12-1	TRBJ2-7	CASSLLGQGGEQHF	89	0.00109903
TRBV1	TRBJ1-6	CTYSAPGHFNSYNSPLYF	400	0.00542171		TRBV12-2	TRBJ1-5	CASSLGTHNNQAPLF	176	0.00230133		TRBV13-1	TRBJ1-5	CASRAGTYNNQAPLF	70	0.000999644		TRBV13-3	TRBJ2-1	CASSLGANYAEQF	65	0.00104837		TRBV5	TRBJ2-7	CASSPTGGPYEQYF	88	0.00108668
TRBV17	TRBJ2-5	CASSTGGQDTQYF	398	0.0053946		TRBV31	TRBJ2-5	CAWSGGQDTRYF	175	0.00228825		TRBV13-1	TRBJ1-1	CASSDAQRDTEVF	70	0.000999644		TRBV13-3	TRBJ1-2	CASSGTNSDYTF	65	0.00104837		TRBV5	TRBJ2-2	CASSQDGVTGQLYF	88	0.00108668
TRBV13-2	TRBJ1-3	CASGDALTGTGNTLYF	396	0.0053675		TRBV26	TRBJ2-7	CASGRDRSYEQYF	175	0.00228825		TRBV5	TRBJ2-4	CASSPTENTLYF	69	0.000985363		TRBV13-2	TRBJ2-5	CASGDSGTPNQDTQYF	65	0.00104837		TRBV5	TRBJ2-1	CAGSQNRNYAEQF	88	0.00108668
TRBV20	TRBJ1-6	CGATRGRNSPLYF	393	0.00532683		TRBV12-2	TRBJ2-5	CASSLDQQDTQYF	175	0.00228825		TRBV5	TRBJ1-2	CASSQDGTASSDYTF	69	0.000985363		TRBV13-2	TRBJ2-1	CASGTGAEQLF	65	0.00104837		TRBV5	TRBJ1-4	CASSPRQGISNEGLF	88	0.00108668
TRBV17	TRBJ2-1	CASSRGTGAQQF	392	0.00531328		TRBV5	TRBJ1-4	CASSRDRGGERLF	174	0.00227518		TRBV5	TRBJ1-2	CASSQDGAANSDYTF	69	0.000985363		TRBV13-2	TRBJ1-2	CASGEDNANSDYAF	65	0.00104837		TRBV30	TRBJ2-5	CSSSRNSQDTQYF	88	0.00108668
TRBV13-1	TRBJ1-2	CASSDAGAGNSDYTF	387	0.00524551		TRBV13-3	TRBJ2-4	CSAGLGEQNTLYF	173	0.0022621		TRBV5	TRBJ1-2	CASGQGDSDYTF	69	0.000985363		TRBV13-1	TRBJ2-2	CASGEDTPNTGQLYF	65	0.00104837		TRBV26	TRBJ2-1	CASSLDGIYAEQF	88	0.00108668
TRBV1	TRBJ1-6	CSALGHFNSYNSPLYF	386	0.00523195		TRBV3	TRBJ2-7	CASSLARDYEQYF	172	0.00224903		TRBV1	TRBJ2-7	CSAVSGGAYEQYF	69	0.000985363		TRBV13-1	TRBJ1-3	CASSGRNSGNTLYF	65	0.00104837		TRBV1	TRBJ2-7	CSADTYEQCF	88	0.00108668
TRBV13-2	TRBJ2-7	CASSGGTGYEQYF	385	0.0052184		TRBV26	TRBJ2-1	CSLEIQSSEAGDSALYLCASSLYSDAEQF	172	0.00224903		TRBV1	TRBJ2-7	CSAKGQGDGQYF	69	0.000985363		TRBV12-2	TRBJ2-7	CASSLVGYEQYF	65	0.00104837		TRBV1	TRBJ2-2	CSAVANTGRLYF	88	0.00108668
TRBV17	TRBJ2-7	CASSTGYEQYF	380	0.00515063		TRBV5	TRBJ2-5	CASSQGPGVQDTQYF	171	0.00223595		TRBV1	TRBJ2-7	CSAGWGSYEQYF	69	0.000985363		TRBV12-1	TRBJ2-7	CASSLVGYEQYF	65	0.00104837		TRBV1	TRBJ1-6	CSAGQRDSPLYF	88	0.00108668
TRBV1	TRBJ1-6	CSVPGHFNSYNSPLYF	377	0.00510996		TRBV3	TRBJ2-5	CASGQPGNQDTQYF	171	0.00223595		TRBV1	TRBJ2-7	CSADGTIGQYF	69	0.000985363		TRBV12-1	TRBJ2-7	CASSFDKSYEQYF	65	0.00104837		TRBV13-3	TRBJ2-7	CTSSDWDNSYEQYF	88	0.00108668
TRBV1	TRBJ1-6	CSASGHFNSYNSPLYF	375	0.00508286		TRBV5	TRBJ2-1	CASSQGHYNYAEQF	170	0.00222287		TRBV1	TRBJ2-4	CSTDLGRQNTLYF	69	0.000985363		TRBV12-1	TRBJ2-7	CAGSPGGGSEQYF	65	0.00104837		TRBV13-3	TRBJ2-7	CASSWDNSYEQYF	88	0.00108668
TRBV17	TRBJ1-5	CASSRQGEAPLF	374	0.0050693		TRBV13-3	TRBJ2-7	CASSPGTGAYEQYF	170	0.00222287		TRBV1	TRBJ2-3	CSAGTGETPYF	69	0.000985363		TRBV12-1	TRBJ2-3	CASGGRDWAAETLYF	65	0.00104837		TRBV5	TRBJ2-7	CASSPQTGGISYEQYF	87	0.00107434
TRBV17	TRBJ1-6	CASSRDSQGRNSPLYF	373	0.00505575		TRBV20	TRBJ2-7	CGARDTGQYEQYF	168	0.00219672		TRBV1	TRBJ2-3	CGAGQTSAETLYF	69	0.000985363		TRBV29	TRBJ2-4	CASGDAGLGGRQNTLYF	64	0.00103224		TRBV5	TRBJ2-1	CASSLGGVNAEQF	87	0.00107434
TRBV1	TRBJ2-1	CSAVRAAEQF	368	0.00498798		TRBV20	TRBJ1-4	CGARPGANERLF	168	0.00219672		TRBV1	TRBJ2-2	CTRSADWGDTGQLYF	69	0.000985363		TRBV29	TRBJ1-3	CASSWDSSGNTLYF	64	0.00103224		TRBV4	TRBJ2-7	CASSKDWSSYEQYF	87	0.00107434
TRBV13-1	TRBJ1-2	CASSGQGQNSDYTF	365	0.00494731		TRBV1	TRBJ2-4	CSAGQGEQNTLYF	168	0.00219672		TRBV1	TRBJ2-2	CSAVRDSTTGQLYF	69	0.000985363		TRBV1	TRBJ2-7	CSGDRPYEQYF	64	0.00103224		TRBV31	TRBJ2-1	CAWSLTGGMYAEQF	87	0.00107434
TRBV13-2	TRBJ2-1	CASSDAAGAEQF	364	0.00493376		TRBV16	TRBJ2-7	CASSRDWGSYEQCF	167	0.00218365		TRBV1	TRBJ1-6	CSADRDSYTSPLYF	69	0.000985363		TRBV1	TRBJ2-3	CTRSADRPSAETLYF	64	0.00103224		TRBV26	TRBJ2-1	CASGGGQGNYAEQF	87	0.00107434
TRBV16	TRBJ2-1	CASSRGGGYAEQF	360	0.00487954		TRBV13-2	TRBJ2-7	CAGGDARRIYEQYF	167	0.00218365		TRBV1	TRBJ1-4	CSADQTISSERLF	69	0.000985363		TRBV1	TRBJ1-6	CSAEDIYNSPPYF	64	0.00103224		TRBV1	TRBJ2-5	CSVSRDPGGDTQYF	87	0.00107434
TRBV23	TRBJ2-4	CSSSPHSSQNTLYF	359	0.00486599		TRBV17	TRBJ2-7	CASSKGASYEQYF	166	0.00217057		TRBV1	TRBJ1-1	CTYSAGREVF	69	0.000985363		TRBV1	TRBJ1-2	CRLRDRGGSDYTF	64	0.00103224		TRBV1	TRBJ2-5	CSPRGWDTQYF	87	0.00107434
TRBV13-3	TRBJ2-1	CASSGDWGGIYAEQF	356	0.00482532		TRBV5	TRBJ2-5	CASRKGGQDTQYF	165	0.0021575		TRBV1	TRBJ1-1	CTRSAGGNTEVF	69	0.000985363		TRBV1	TRBJ1-1	CTRSADHGGTEVF	64	0.00103224		TRBV1	TRBJ2-3	CGAARGGYF	87	0.00107434
TRBV1	TRBJ1-3	CSADEGALSGNTPYF	352	0.00477111		TRBV15	TRBJ2-7	CAGSLGGEQYF	165	0.0021575		TRBV1	TRBJ1-1	CSADVNTEVF	69	0.000985363		TRBV15	TRBJ2-1	CASSRLGVYAEQF	64	0.00103224		TRBV1	TRBJ1-1	CQGTENTEVSF	87	0.00107434
TRBV17	TRBJ1-3	CASSRRASGNTLYF	351	0.00475755		TRBV1	TRBJ1-3	CSAGTASGNTPYF	164	0.00214442		TRBV1	TRBJ1-1	CSAAGGDTEVSF	69	0.000985363		TRBV15	TRBJ1-3	CASSPQGNGNTLYF	64	0.00103224		TRBV15	TRBJ1-1	CASSPGATEVF	87	0.00107434
TRBV13-2	TRBJ1-2	CASRTTSNSDYTF	351	0.00475755		TRBV13-3	TRBJ2-7	CASSVRDWGSYEQYF	164	0.00214442		TRBV1	TRBJ1-1	CRAAQGNTEVF	69	0.000985363		TRBV15	TRBJ1-2	CASSLATNSDYTF	64	0.00103224		TRBV13-3	TRBJ1-1	CASSPGQYTEVF	87	0.00107434
TRBV20	TRBJ1-1	CGARDRTSEVF	348	0.00471689		TRBV1	TRBJ1-1	CRAGDTEVF	163	0.00213134		TRBV13-3	TRBJ2-1	CASSDQSYAVQF	69	0.000985363		TRBV13-3	TRBJ1-4	CASSSSNEGLF	64	0.00103224		TRBV13-3	TRBJ1-1	CASRQISTEVF	87	0.00107434
TRBV15	TRBJ2-4	CASSFQGGESTLYF	341	0.00462201		TRBV24	TRBJ2-1	CASSPGGRAEQF	162	0.00211827		TRBV13-2	TRBJ2-5	CASGDGGGQDTRYF	69	0.000985363		TRBV13-2	TRBJ2-1	CASGDARGNYAEQSF	64	0.00103224		TRBV13-1	TRBJ2-7	CAGSGLGEGEQYF	87	0.00107434
TRBV17	TRBJ2-7	CASSRDGGAEEQYF	340	0.00460846		TRBV1	TRBJ2-7	CNPGQRWEQYF	161	0.00210519		TRBV13-2	TRBJ2-4	CTCSADLGRQNTLYF	69	0.000985363		TRBV13-1	TRBJ2-7	CASSDGQRYF	64	0.00103224		TRBV5	TRBJ2-7	CASSRAVYEQYF	86	0.00106199
TRBV13-2	TRBJ2-1	CASGDGGRGYAEQLF	340	0.00460846		TRBV13-1	TRBJ1-1	CASSDRQGEVF	161	0.00210519		TRBV13-2	TRBJ2-2	CASSQALTGQLYF	69	0.000985363		TRBV13-1	TRBJ1-6	CASSDAADSPLYF	64	0.00103224		TRBV5	TRBJ2-1	CVSSQGLGGRGAEQF	86	0.00106199
TRBV5	TRBJ2-3	CASSQDPTGASAETLYF	339	0.0045949		TRBV12-2	TRBJ1-1	CASSAGTENTEVF	161	0.00210519		TRBV13-2	TRBJ1-4	CASGDAFNERLF	69	0.000985363		TRBV12-1	TRBJ2-7	CASSLDKRYEQYF	64	0.00103224		TRBV26	TRBJ2-1	CASGLDRIYAEQF	86	0.00106199
TRBV5	TRBJ2-3	CASSQDLTGASAETPYF	337	0.00456779		TRBV16	TRBJ2-5	CASSSDRGDTQHF	160	0.00209212		TRBV13-2	TRBJ1-4	CASGDAFGGIPNERLF	69	0.000985363		TRBV12-1	TRBJ1-2	CAGSPGGNSDYTF	64	0.00103224		TRBV26	TRBJ1-1	CAGSPTGSNTEVF	86	0.00106199
TRBV1	TRBJ1-6	CSAPGHFSSYNSPLYF	337	0.00456779		TRBV1	TRBJ1-5	CSATGDNNLAPLF	159	0.00207904		TRBV13-2	TRBJ1-3	CASGERQGNEQYF	69	0.000985363		TRBV5	TRBJ2-2	CASSQETGGTTGQL_F	63	0.00101611		TRBV1	TRBJ2-4	CSVGDSQNTLYF	86	0.00106199
TRBV20	TRBJ2-1	CGVRDRSYAEQF	336	0.00455424		TRBV5	TRBJ1-1	CASRQDGGRGVF	157	0.00205289		TRBV13-2	TRBJ1-1	CASSQSITTNTEVF	69	0.000985363		TRBV5	TRBJ1-5	CASNQDLSYNNQAPLF	63	0.00101611		TRBV1	TRBJ2-2	CSAGQGGDTGQLYF	86	0.00106199
TRBV20	TRBJ1-4	CGAKTVSNERLF	336	0.00455424		TRBV5	TRBJ2-5	CASSQDPGAQDTQYF	155	0.00202674		TRBV13-1	TRBJ2-7	CASSDVGYEQHF	69	0.000985363		TRBV31	TRBJ2-1	CAWTWGVNYAEQLF	63	0.00101611		TRBV1	TRBJ2-1	CSASQSNYAERF	86	0.00106199
TRBV12-1	TRBJ1-2	CASSFSGSDYTF	335	0.00454068		TRBV5	TRBJ1-1	CASSQEGVGNTEVLF	155	0.00202674		TRBV29	TRBJ2-4	CASSPTENTSYF	68	0.000971083		TRBV26	TRBJ2-5	CASSLFGWQDPQYF	63	0.00101611		TRBV1	TRBJ1-5	CSAVGDNRAPLF	86	0.00106199
TRBV17	TRBJ1-3	CASSREGGAGNTLYF	333	0.00451358		TRBV1	TRBJ1-1	CSADARGANTEVYF	155	0.00202674		TRBV1	TRBJ2-5	CTRSGTGGARDTQYF	68	0.000971083		TRBV26	TRBJ1-6	CASSGSYNSPLHF	63	0.00101611		TRBV1	TRBJ1-5	CSADRGVAPLF	86	0.00106199
TRBV5	TRBJ2-5	CASSHEGEDTQYF	329	0.00445936		TRBV13-3	TRBJ2-5	CASSGPDQDTQYF	155	0.00202674		TRBV1	TRBJ2-4	CTRSDWGGQNTLYF	68	0.000971083		TRBV26	TRBJ1-1	CASSGTGHTEVF	63	0.00101611		TRBV16	TRBJ1-1	CASSLQGSHPEVLF	86	0.00106199
TRBV20	TRBJ2-4	CGARSDWGPSQNTLYF	328	0.0044458		TRBV20	TRBJ1-2	CGARTANSDYTF	154	0.00201366		TRBV1	TRBJ2-3	CSGRQAEALYF	68	0.000971083		TRBV1	TRBJ2-7	CSAGGWGGYEQYF	63	0.00101611		TRBV15	TRBJ1-2	CASSFRTNSDCTF	86	0.00106199
TRBV1	TRBJ2-7	CGLGLSSYEQYF	328	0.0044458		TRBV1	TRBJ2-4	CSGGLGEQNTLYF	154	0.00201366		TRBV1	TRBJ2-3	CSDGTGGVSAETLYF	68	0.000971083		TRBV1	TRBJ2-4	CAGRQNTLYF	63	0.00101611		TRBV13-3	TRBJ2-5	CASSQDGGVQDTQYF	86	0.00106199
TRBV15	TRBJ2-2	CASSLQGANTGQLCF	326	0.0044187		TRBV1	TRBJ1-1	CSAERGNTEVLF	153	0.00200059		TRBV1	TRBJ2-3	CSAGQTGAETLYF	68	0.000971083		TRBV1	TRBJ2-3	CSADRAGGAETLCF	63	0.00101611		TRBV13-1	TRBJ1-2	CASSFRTNSDYTF	86	0.00106199
TRBV20	TRBJ1-4	CGASRQGTNERLF	325	0.00440514		TRBV13-2	TRBJ2-7	CASTAGGDEQYF	153	0.00200059		TRBV1	TRBJ2-2	CSLGESNTGQLYF	68	0.000971083		TRBV1	TRBJ1-4	CSADANYERLF	63	0.00101611		TRBV5	TRBJ1-1	CASILKTNSNTEVF	85	0.00104964
TRBV15	TRBJ2-2	CASSLQEANTGQLYF	325	0.00440514		TRBV12-1	TRBJ1-1	CASSAGTENTEVF	153	0.00200059		TRBV1	TRBJ1-6	CSADRDSYNSPF	68	0.000971083		TRBV1	TRBJ1-1	CSADRGGTEVF	63	0.00101611		TRBV26	TRBJ2-1	CASSRDYAGQF	85	0.00104964
TRBV29	TRBJ1-1	CASSLTGPSNTGVF	324	0.00439159		TRBV1	TRBJ2-5	CTRSEGTGVHQDTQYF	151	0.00197444		TRBV1	TRBJ1-4	CGADRIGSNERLF	68	0.000971083		TRBV16	TRBJ2-3	CASSLGGRAGTLYF	63	0.00101611		TRBV26	TRBJ2-1	CASSDDRTGLSEQF	85	0.00104964
TRBV1	TRBJ1-4	CSAGGTEPNERLSF	323	0.00437803		TRBV12-1	TRBJ1-5	CASSYRREEGNQAPLF	151	0.00197444		TRBV1	TRBJ1-2	CSADRSSDYTF	68	0.000971083		TRBV15	TRBJ2-5	CASSLDGGPDTQYF	63	0.00101611		TRBV26	TRBJ1-2	CASSQGQTSSDYTF	85	0.00104964
TRBV31	TRBJ2-7	CAWSPGQSYERYF	321	0.00435092		TRBV3	TRBJ1-5	CASSLGDSQAPLF	150	0.00196136		TRBV1	TRBJ1-1	CSAGGNTEAF	68	0.000971083		TRBV15	TRBJ2-4	CASSAGTKNALYF	63	0.00101611		TRBV26	TRBJ1-1	CASSGTSTEVF	85	0.00104964
TRBV20	TRBJ2-1	CGARDSNYAEQF	321	0.00435092		TRBV1	TRBJ2-3	CGVGTGSSAETLYF	150	0.00196136		TRBV13-3	TRBJ2-1	CASSDQSHAEQF	68	0.000971083		TRBV15	TRBJ2-1	CASSFRDGGYAEQF	63	0.00101611		TRBV1	TRBJ2-7	CSAEGGGEQHF	85	0.00104964
TRBV1	TRBJ2-1	CSAVRAAGQF	317	0.00429671		TRBV13-2	TRBJ2-7	CASSQTGGKVYEQYF	150	0.00196136		TRBV13-2	TRBJ2-7	CTCSARDWGDEQYF	68	0.000971083		TRBV15	TRBJ2-1	CASRSIGGYNYAEQF	63	0.00101611		TRBV1	TRBJ2-2	CTSTLGGGTGRLYF	85	0.00104964
TRBV16	TRBJ2-1	CASSLGLGVNYAE_F	317	0.00429671		TRBV13-2	TRBJ2-2	CASSDVQGANTGQLYF	150	0.00196136		TRBV13-2	TRBJ2-7	CAGGMEGGREQYF	68	0.000971083		TRBV15	TRBJ1-4	CASSLSHFSSERLF	63	0.00101611		TRBV1	TRBJ1-6	CSVGQGNSPLYF	85	0.00104964
TRBV13-2	TRBJ2-1	CASGDATYNYAEQF	317	0.00429671		TRBV5	TRBJ2-5	CASSQDPGVQGTQYF	149	0.00194828		TRBV13-2	TRBJ2-4	CASGDESSQNALYF	68	0.000971083		TRBV15	TRBJ1-1	CASSGTGYTEVF	63	0.00101611		TRBV1	TRBJ1-1	CSAAQDTEVF	85	0.00104964
TRBV30	TRBJ2-4	CSSRGWGTSQNTSYF	316	0.00428315		TRBV1	TRBJ2-4	CQGPNTLYF	149	0.00194828		TRBV13-2	TRBJ2-3	CASSPRGTETLYF	68	0.000971083		TRBV14	TRBJ1-4	CASSPGQNFSNGRLF	63	0.00101611		TRBV13-2	TRBJ1-6	CASGEGYNSPLYF	85	0.00104964
TRBV23	TRBJ2-5	CSSSQDWGVDTQYF	316	0.00428315		TRBV1	TRBJ2-3	CSVGTGSGAETLYF	149	0.00194828		TRBV13-2	TRBJ2-2	CAWSLPRGSNTGQLYF	68	0.000971083		TRBV13-3	TRBJ2-7	CASSDEGDEQYF	63	0.00101611		TRBV13-1	TRBJ2-4	CASGAWVGRGDTLYF	85	0.00104964
TRBV1	TRBJ1-6	CSAPGHFNSYNSPLCF	315	0.0042696		TRBV13-3	TRBJ1-1	CASSVANTEVSF	149	0.00194828		TRBV13-2	TRBJ1-1	CGSGETGGSTEVF	68	0.000971083		TRBV13-2	TRBJ2-4	CASSRGVSQNTLYF	63	0.00101611		TRBV12-1	TRBJ1-6	CASSLHNSYNSPLYF	85	0.00104964
TRBV1	TRBJ1-6	CSAPRHFNSYNSPLYF	314	0.00425604		TRBV29	TRBJ2-7	CASSDASQGYEQYF	147	0.00192213		TRBV13-1	TRBJ1-5	CASGAGTNNNQAPLF	68	0.000971083		TRBV13-1	TRBJ2-7	CASSLGQGLYEQYF	63	0.00101611		TRBV5	TRBJ1-3	CASSLQGAGNTLYF	84	0.00103729
TRBV20	TRBJ1-2	CGAREAGRNSDYTF	310	0.00420183		TRBV1	TRBJ1-3	CTRSAGTASGNTLYF	147	0.00192213		TRBV5	TRBJ2-3	CASHRAETLYF	67	0.000956802		TRBV13-1	TRBJ1-6	CASSHAGDSPLYF	63	0.00101611		TRBV5	TRBJ1-1	CASSQDKTGVTEAF	84	0.00103729
TRBV31	TRBJ1-2	CA_SLWRNSDYTF	309	0.00418827		TRBV13-2	TRBJ1-3	CASGDARDRDGNTLYF	146	0.00190906		TRBV5	TRBJ1-1	CANMSQGRTLYCTCSAAQGNTEVF	67	0.000956802		TRBV13-1	TRBJ1-6	CASSDAVDSPLYF	63	0.00101611		TRBV31	TRBJ2-1	CAWSLTGEVYAEQF	84	0.00103729
TRBV15	TRBJ2-7	CASRAGTGGALEQYF	309	0.00418827		TRBV31	TRBJ2-2	CAWGQGTNTGQLYF	145	0.00189598		TRBV1	TRBJ2-7	CSAQGQGDEQYF	67	0.000956802		TRBV13-1	TRBJ1-1	CASSDARRGVF	63	0.00101611		TRBV31	TRBJ1-5	CASRGTNNQAPLF	84	0.00103729
TRBV14	TRBJ2-7	CASSAGGGGSYEQYF	306	0.00414761		TRBV20	TRBJ2-7	CGARDSGQYEQYF	143	0.00186983		TRBV1	TRBJ2-7	CSAGRGGGYEQYF	67	0.000956802		TRBV12-1	TRBJ2-7	CASSLAAAGTISYEQYF	63	0.00101611		TRBV2	TRBJ1-2	CASSQKQGRSDYTF	84	0.00103729
TRBV20	TRBJ1-1	CGARGRQPNTEVF	303	0.00410695		TRBV1	TRBJ1-1	CTRSAERGNTEVF	142	0.00185675		TRBV1	TRBJ2-3	CTRSGQDAETLYF	67	0.000956802		TRBV12-1	TRBJ1-2	CASPLGTTNSDYTF	63	0.00101611		TRBV26	TRBJ1-2	CASSRGQTNSDYTF	84	0.00103729
TRBV16	TRBJ1-4	CASNSGGGVSNERLF	301	0.00407984		TRBV1	TRBJ2-7	CSARGRE_YF	141	0.00184368		TRBV1	TRBJ2-1	CSAVGLGGYAEQF	67	0.000956802		TRBV5	TRBJ2-5	CAGSQDWGPQDTQYF	62	0.000999984		TRBV1	TRBJ2-4	CSATGVGGNTLYF	84	0.00103729
TRBV13-2	TRBJ2-7	CASGDARGRGEQYF	300	0.00406628		TRBV13-2	TRBJ1-3	CASGDGDSSGNTLYF	141	0.00184368		TRBV1	TRBJ1-4	CSPRGISNERLF	67	0.000956802		TRBV1	TRBJ2-3	CSADRTGGAETLYF	62	0.000999984		TRBV1	TRBJ2-2	CSVGRNTGQLYF	84	0.00103729
TRBV1	TRBJ2-5	CGSGRGDTQYF	299	0.00405273		TRBV12-1	TRBJ2-5	CASSLDQQDTQYF	141	0.00184368		TRBV1	TRBJ1-4	CSADRAGGDEGLF	67	0.000956802		TRBV1	TRBJ2-3	CSADRAGGTETLYF	62	0.000999984		TRBV1	TRBJ2-1	CSAGHNNYTEQF	84	0.00103729
TRBV1	TRBJ2-3	CSADSGAGAETLYF	299	0.00405273		TRBV3	TRBJ2-4	CASSPRLGGRMNTLYF	140	0.0018306		TRBV1	TRBJ1-1	CSGGQRGTEVF	67	0.000956802		TRBV1	TRBJ2-1	CSGVAERF	62	0.000999984		TRBV1	TRBJ1-1	CSGQGAWATEVF	84	0.00103729
TRBV1	TRBJ2-2	CSADLLGNTGQLYF	299	0.00405273		TRBV1	TRBJ2-3	CTRSADIQGNAETLYF	139	0.00181753		TRBV1	TRBJ1-1	CGAGGGDTEVF	67	0.000956802		TRBV13-2	TRBJ2-5	CASSGLGVQDTQYF	62	0.000999984		TRBV15	TRBJ1-2	CASSFRTNSDYAF	84	0.00103729
TRBV17	TRBJ2-1	CASRRTGGVNYAEQF	297	0.00402562		TRBV12-1	TRBJ1-5	CASSLGTHNNQAPLF	139	0.00181753		TRBV13-1	TRBJ1-3	CASSREGARALYF	67	0.000956802		TRBV13-2	TRBJ2-3	CAWRNWDSAETLYF	62	0.000999984		TRBV13-3	TRBJ2-3	CASSDARGSSAETLYF	84	0.00103729
TRBV13-1	TRBJ1-2	CASRDNANSDYTF	297	0.00402562		TRBV3	TRBJ2-3	CASSFTGGAHAETLYF	138	0.00180445		TRBV5	TRBJ2-3	CAGSQGLGGSAETLYF	66	0.000942522		TRBV13-1	TRBJ2-2	CASSAGTWNTGQLYF	62	0.000999984		TRBV13-3	TRBJ1-5	CASSAGTNNNQAPLF	84	0.00103729
TRBV3	TRBJ2-2	CASSSGGANTGQLYF	294	0.00398496		TRBV5	TRBJ1-3	CASSLHYSGNTLYF	137	0.00179138		TRBV5	TRBJ2-2	CASSQDQQGAGQLYF	66	0.000942522		TRBV13-1	TRBJ2-1	CASGVSGTEQF	62	0.000999984		TRBV13-2	TRBJ2-3	CTCSVGSSAETLYF	84	0.00103729
TRBV13-3	TRBJ2-7	CASSSRDWGFSYERYF	288	0.00390363		TRBV1	TRBJ2-4	CSAGLGDQNTLYF	137	0.00179138		TRBV1	TRBJ2-7	CSGGLSYGQYF	66	0.000942522		TRBV13-1	TRBJ2-1	CASGDARDWGNYAEQF	62	0.000999984		TRBV13-2	TRBJ2-3	CSADGDRAPAETLYF	84	0.00103729
TRBV29	TRBJ2-1	CASGDREYAEQLF	285	0.00386297		TRBV1	TRBJ2-3	CSVGTGSSAGTLYF	137	0.00179138		TRBV1	TRBJ2-7	CSADMGGGPYEQYF	66	0.000942522		TRBV12-2	TRBJ2-5	CASSLWGEDTQYF	62	0.000999984		TRBV13-2	TRBJ2-3	CASSRGTNSAETLYF	84	0.00103729
TRBV20	TRBJ2-7	CGARVGF	285	0.00386297		TRBV1	TRBJ1-1	CSADDGQADTEVF	137	0.00179138		TRBV1	TRBJ2-5	CSDPGGAGQDTQYF	66	0.000942522		TRBV12-1	TRBJ2-3	CASSWTGASAETPYF	62	0.000999984		TRBV13-2	TRBJ1-6	CASGESYNSPPYF	84	0.00103729
TRBV17	TRBJ2-5	CASRGEDTQYF	284	0.00384942		TRBV5	TRBJ2-3	CASSWGQGGSAETLYF	136	0.0017783		TRBV1	TRBJ1-4	CSGDRISNERLLF	66	0.000942522		TRBV5	TRBJ1-5	CASSQDSSYNNQAPLF	61	0.000983855		TRBV5	TRBJ2-7	CASSQGGRE_YF	83	0.00102494
TRBV13-2	TRBJ1-1	CASSDWQGRGTEVF	284	0.00384942		TRBV20	TRBJ2-5	CGARDWQDTQYF	136	0.0017783		TRBV1	TRBJ1-4	CSAVQDRQLGSMTEK_SF	66	0.000942522		TRBV31	TRBJ1-5	CAWSPSNRAPLF	61	0.000983855		TRBV5	TRBJ2-1	CASSQGLGGWGAEQF	83	0.00102494
TRBV23	TRBJ1-6	CSSSRDRDNSPLYF	283	0.00383586		TRBV1	TRBJ2-7	CSADPDTSPYEQYF	136	0.0017783		TRBV1	TRBJ1-4	CGGDRISNERLF	66	0.000942522		TRBV26	TRBJ1-6	CASSGPYNSPLYF	61	0.000983855		TRBV5	TRBJ1-6	CASSEKGWNSPLYF	83	0.00102494
TRBV16	TRBJ2-7	CASGSRTGSSYEQYF	283	0.00383586		TRBV24	TRBJ2-1	CASSLSGYAEQF	135	0.00176522		TRBV1	TRBJ1-4	CGAGDERLF	66	0.000942522		TRBV26	TRBJ1-1	CASSPGTDANTEVF	61	0.000983855		TRBV5	TRBJ1-1	CAGSQDKTGVTEVF	83	0.00102494
TRBV1	TRBJ2-7	CSADGVGQYF	282	0.00382231		TRBV21	TRBJ2-7	CASSLRGNPYEQYF	135	0.00176522		TRBV1	TRBJ1-3	CSAERGGSTLYF	66	0.000942522		TRBV1	TRBJ2-7	CTRSAEGWGGYEQYF	61	0.000983855		TRBV30	TRBJ2-5	CSSSRDNQDTQYF	83	0.00102494
TRBV1	TRBJ1-6	CSAPGHFNSCNSPLYF	282	0.00382231		TRBV1	TRBJ2-1	CSRDRYYAEQLF	135	0.00176522		TRBV1	TRBJ1-3	CNAERGGNTLYF	66	0.000942522		TRBV1	TRBJ2-7	CSAVGGKYEPYF	61	0.000983855		TRBV1	TRBJ2-7	CSAGLGGNEQYF	83	0.00102494
TRBV13-3	TRBJ2-3	CASSAGAGGSAETLYF	282	0.00382231		TRBV5	TRBJ1-1	CASGQDPGAGTEVF	134	0.00175215		TRBV1	TRBJ1-2	CSVQESCSDYTF	66	0.000942522		TRBV1	TRBJ2-7	CSAGRTGGAYEQYF	61	0.000983855		TRBV1	TRBJ2-7	CSADRAGGSEQYF	83	0.00102494
TRBV5	TRBJ2-3	CASSQDLAGASAETLYF	281	0.00380875		TRBV1	TRBJ2-4	CSAGLGEQNSLYF	134	0.00175215		TRBV1	TRBJ1-1	CSLGQSNTEVF	66	0.000942522		TRBV1	TRBJ2-4	CTRAGHQNTLYF	61	0.000983855		TRBV1	TRBJ2-2	CASTLGGGTGQLYF	83	0.00102494
TRBV5	TRBJ2-3	CAGSQDLTGASAETLYF	281	0.00380875		TRBV13-3	TRBJ2-7	CASSDASQAYEQYF	134	0.00175215		TRBV1	TRBJ1-1	CSAGGGDTEAF	66	0.000942522		TRBV1	TRBJ1-6	CTRSAQGGYNSPLYF	61	0.000983855		TRBV1	TRBJ1-2	CGGPDYTF	83	0.00102494
TRBV20	TRBJ1-2	CGARKGSDYTF	280	0.0037952		TRBV13-2	TRBJ2-2	CASSLGQGDTGQLYF	134	0.00175215		TRBV13-2	TRBJ2-5	CASGDHWVNQDTQYF	66	0.000942522		TRBV1	TRBJ1-4	CSADSNNERLF	61	0.000983855		TRBV13-3	TRBJ2-5	CASSDRDQDTQHF	83	0.00102494
TRBV20	TRBJ2-1	CGARALLGGRDAEQF	279	0.00378164		TRBV3	TRBJ2-7	CASSQDRYEQYF	133	0.00173907		TRBV13-2	TRBJ1-2	CASGNARGAENSDYTF	66	0.000942522		TRBV1	TRBJ1-1	CSGDKDTEVF	61	0.000983855		TRBV13-2	TRBJ2-5	CASSLTGGDTQYF	83	0.00102494
TRBV20	TRBJ2-7	CGAYRGLGEQYF	278	0.00376809		TRBV1	TRBJ2-3	CSVRTGSSAETLYF	133	0.00173907		TRBV13-2	TRBJ1-1	CASSPGTGANTEVF	66	0.000942522		TRBV1	TRBJ1-1	CSADYTEVLF	61	0.000983855		TRBV13-2	TRBJ2-5	CASGEGTGQDTQCF	83	0.00102494
TRBV16	TRBJ2-7	CASSSRTGSSYEQYF	276	0.00374098		TRBV5	TRBJ2-5	CASSQDPGVQDAQYF	132	0.001726		TRBV13-2	TRBJ1-1	CASGQGRDTEVSF	66	0.000942522		TRBV13-3	TRBJ2-5	CASSRTGAQDTQYF	61	0.000983855		TRBV13-2	TRBJ2-3	CAGGPGLGNAETLYF	83	0.00102494
TRBV13-1	TRBJ2-7	CASGGTAYEQYF	276	0.00374098		TRBV5	TRBJ2-4	CASSRAGGENTLCF	132	0.001726		TRBV13-1	TRBJ2-7	CASSDVGYEQCF	66	0.000942522		TRBV13-2	TRBJ2-7	CASGGAGGVQYF	61	0.000983855		TRBV13-2	TRBJ1-6	CASSFGTGGAGSPLYF	83	0.00102494
TRBV13-2	TRBJ2-1	CASGTTGGANAEQF	274	0.00371387		TRBV1	TRBJ2-4	CSAGLGEQNPLYF	132	0.001726		TRBV13-1	TRBJ1-3	CASSETGGDTLYF	66	0.000942522		TRBV13-2	TRBJ2-7	CASGEGAGGYEQYF	61	0.000983855		TRBV13-2	TRBJ1-2	CASGDRGSDYTF	83	0.00102494
TRBV20	TRBJ2-4	CGARDSQNTLYF	273	0.00370032		TRBV1	TRBJ2-3	CSVGPGSSAETLYF	132	0.001726		TRBV13-1	TRBJ1-1	CASSDVQKDTEVF	66	0.000942522		TRBV13-2	TRBJ2-5	CASGASGTKGTQYF	61	0.000983855		TRBV13-1	TRBJ1-2	CASSNAGGGSDYTF	83	0.00102494
TRBV1	TRBJ2-7	CSAEGQGRTYGQYF	273	0.00370032		TRBV26	TRBJ2-5	CASSQDPGVQDTQYF	131	0.00171292		TRBV5	TRBJ2-7	CASSQGQRGEQYF	65	0.000928241		TRBV13-2	TRBJ2-3	CASSWGDAETLYF	61	0.000983855		TRBV12-1	TRBJ2-7	CASSLLGQGGEQCF	83	0.00102494
TRBV17	TRBJ1-1	CASSRSDGNTEVF	271	0.00367321		TRBV24	TRBJ2-3	CASSPQTSAETLYF	131	0.00171292		TRBV5	TRBJ2-7	CASSLGGQSYEQYF	65	0.000928241		TRBV13-2	TRBJ2-2	CASSFSGANTGQLYF	61	0.000983855		TRBV5	TRBJ2-7	CAGSPTGGSYEQYF	82	0.00101259
TRBV1	TRBJ2-1	CTRSGTGNYAEQF	270	0.00365966		TRBV20	TRBJ2-5	CGARESGQDTQYF	131	0.00171292		TRBV5	TRBJ1-2	CASSQDGTADSDYTF	65	0.000928241		TRBV13-2	TRBJ2-1	CASGDRGADYAEQF	61	0.000983855		TRBV5	TRBJ2-4	CASSPGRGARGQNTLYF	82	0.00101259
TRBV17	TRBJ2-7	CASSRQYEQYF	270	0.00365966		TRBV1	TRBJ2-7	CSPGQIIYGQYF	131	0.00171292		TRBV31	TRBJ1-5	CAWSPGGVNQAQHF	65	0.000928241		TRBV13-2	TRBJ1-5	CASSLDRAQAPLF	61	0.000983855		TRBV5	TRBJ1-1	CSSSLKTNSNTEVF	82	0.00101259
TRBV17	TRBJ2-2	CASSDWGPNTGQLYF	269	0.0036461		TRBV1	TRBJ2-1	CSAAEGYAEQF	131	0.00171292		TRBV30	TRBJ2-7	CSSRDRDWGYEQYF	65	0.000928241		TRBV12-1	TRBJ2-7	CASSRDWGYEQYF	61	0.000983855		TRBV5	TRBJ1-1	CASSLKTNSNT_VF	82	0.00101259
TRBV17	TRBJ2-1	CASSRRGGGAEQF	265	0.00359188		TRBV1	TRBJ1-6	CSADANNSPPYF	131	0.00171292		TRBV1	TRBJ2-7	CTRSADGTIEQYF	65	0.000928241		TRBV12-1	TRBJ2-7	CASSRDKAYEQYF	61	0.000983855		TRBV5	TRBJ1-1	CASSIKTNSNTEVF	82	0.00101259
TRBV20	TRBJ1-2	CGASRGGSDYTF	264	0.00357833		TRBV13-2	TRBJ2-5	CASSDELGGLGTQYF	131	0.00171292		TRBV1	TRBJ2-5	CTRSAGGLGQDTQYF	65	0.000928241		TRBV12-1	TRBJ2-7	CASSLGLDEQYF	61	0.000983855		TRBV4	TRBJ2-1	CASSHRDWGAEQYF	82	0.00101259
TRBV1	TRBJ1-6	CSAPGHFNSYTSPLYF	264	0.00357833		TRBV12-2	TRBJ2-5	CASGQQDTQYF	131	0.00171292		TRBV1	TRBJ2-4	CSGTEGVSQNTLYF	65	0.000928241		TRBV12-1	TRBJ1-2	CASSAGTTNSDYTF	61	0.000983855		TRBV26	TRBJ2-7	CAGSPGTGGYEQYF	82	0.00101259
TRBV20	TRBJ1-4	CGARQFSNERLF	261	0.00353767		TRBV12-1	TRBJ2-1	CASFLGGIAEQF	131	0.00171292		TRBV1	TRBJ2-4	CSAGYQNALYF	65	0.000928241		TRBV4	TRBJ2-2	CASSPRTANTGQLYF	60	0.000967726		TRBV26	TRBJ2-1	CASSPDRIYAEQF	82	0.00101259
TRBV1	TRBJ2-7	CSADRDRAYEQYF	261	0.00353767		TRBV13-2	TRBJ2-4	CASSDPGSQNTLYF	130	0.00169985		TRBV1	TRBJ2-4	CRADQGRQNTLYF	65	0.000928241		TRBV26	TRBJ1-1	CASSGTGYTEVSF	60	0.000967726		TRBV26	TRBJ1-2	CSLEIQSSEAGDSALYLRASSLRANSDYTF	82	0.00101259
TRBV15	TRBJ2-7	CASSLPGGYEQYF	261	0.00353767		TRBV3	TRBJ2-5	CASSWNKDTQYF	129	0.00168677		TRBV1	TRBJ2-3	CSGGHTSAETPYF	65	0.000928241		TRBV1	TRBJ2-7	CTRSASGNEQYF	60	0.000967726		TRBV1	TRBJ2-5	CSVDQSGGGTQYF	82	0.00101259
TRBV13-2	TRBJ1-1	CASRGDRTNTEVF	261	0.00353767		TRBV29	TRBJ2-1	CASSFRQGYAEQF	129	0.00168677		TRBV1	TRBJ2-2	CTRSAGTSNTGQLYF	65	0.000928241		TRBV1	TRBJ1-4	CSAEPISSERLF	60	0.000967726		TRBV1	TRBJ2-5	CSLRGWDTRYF	82	0.00101259
TRBV13-1	TRBJ1-4	CASSEAVSNKRLF	261	0.00353767		TRBV1	TRBJ1-1	CSAGQEVLF	128	0.00167369		TRBV1	TRBJ2-1	CTRSAGGGVAEQF	65	0.000928241		TRBV1	TRBJ1-1	CSADERNTEVF	60	0.000967726		TRBV1	TRBJ2-5	CGAVGDQDTQYF	82	0.00101259
TRBV13-2	TRBJ2-1	CASGGLGGGVAEQLF	260	0.00352411		TRBV16	TRBJ1-1	CASSLGQTADTEVF	128	0.00167369		TRBV1	TRBJ1-6	CSAGQYNPPLYF	65	0.000928241		TRBV15	TRBJ1-4	CASSLSHFSNERF	60	0.000967726		TRBV1	TRBJ2-3	CSVGQGHSAETLYF	82	0.00101259
TRBV1	TRBJ1-1	CSGGREVF	259	0.00351056		TRBV13-2	TRBJ2-5	CASSVGQGEDTQYF	128	0.00167369		TRBV1	TRBJ1-4	CSADRGGNERLF	65	0.000928241		TRBV13-3	TRBJ2-4	CASGDAGLGGRQNTLYF	60	0.000967726		TRBV1	TRBJ2-2	CGAVANTGQLYF	82	0.00101259
TRBV20	TRBJ2-7	CGAREDSSYEQYF	258	0.003497		TRBV5	TRBJ2-5	CAGSQDPGVQDTQYF	127	0.00166062		TRBV1	TRBJ1-1	CSAGDNTEVLF	65	0.000928241		TRBV13-2	TRBJ2-7	CASRDWGYEQYF	60	0.000967726		TRBV1	TRBJ2-1	CSADTGAEQSF	82	0.00101259
TRBV5	TRBJ2-4	CASSQAGGGGGSSQNTLYF	257	0.00348345		TRBV1	TRBJ1-1	CSAERGNTEAF	127	0.00166062		TRBV1	TRBJ1-1	CSADQGNTEVF	65	0.000928241		TRBV13-1	TRBJ1-6	CPSSDAGDSPLYF	60	0.000967726		TRBV1	TRBJ1-5	CSVDRGAAPLF	82	0.00101259
TRBV1	TRBJ2-4	CSTDDINTLYF	256	0.0034699		TRBV13-2	TRBJ2-5	CASSPGTAPDTQYF	127	0.00166062		TRBV1	TRBJ1-1	CSAAQANTEVF	65	0.000928241		TRBV12-1	TRBJ2-7	CASSPDKTYEQ_F	60	0.000967726		TRBV1	TRBJ1-1	CSAGRNTEVF	82	0.00101259
TRBV29	TRBJ1-4	CASSLFPNERLF	253	0.00342923		TRBV13-2	TRBJ1-2	CASSEGENSDYTF	127	0.00166062		TRBV19	TRBJ1-1	CASSIGTNTEVF	65	0.000928241		TRBV12-1	TRBJ2-7	CASSLYKSYEQYF	60	0.000967726		TRBV15	TRBJ1-1	CASSLDRANTEVYF	82	0.00101259
TRBV1	TRBJ1-4	CSADSGTISDERLF	252	0.00341568		TRBV5	TRBJ1-1	CASSQEGVGSTEVF	126	0.00164754		TRBV13-2	TRBJ2-7	CANGERQGNEQYF	65	0.000928241		TRBV12-1	TRBJ2-5	CASSRTGVQDTQYF	60	0.000967726		TRBV13-3	TRBJ2-7	CASSGQGHPYEQYF	82	0.00101259
TRBV5	TRBJ2-3	CASSRDLTGASAETLYF	251	0.00340212		TRBV24	TRBJ1-1	CASSPQSEVF	126	0.00164754		TRBV13-1	TRBJ1-1	CASSEGQRNTEVLF	65	0.000928241		TRBV12-1	TRBJ1-2	CASSLGTANSDYTF	60	0.000967726		TRBV13-3	TRBJ2-3	CASSDVRGPSAETLYF	82	0.00101259
TRBV13-1	TRBJ2-7	CASSGGTGYEQYF	251	0.00340212		TRBV1	TRBJ2-2	CSAGGQGNTGQLYF	126	0.00164754		TRBV5	TRBJ2-2	CAGSQALTGQLYF	64	0.00091396		TRBV29	TRBJ2-1	CASSCGRESNYAEQLF	59	0.000951597		TRBV13-3	TRBJ1-4	CASSFSTVNERLF	82	0.00101259
TRBV14	TRBJ2-3	CASSFTAETLYF	250	0.00338857		TRBV13-2	TRBJ2-1	CASSGDWGLYAEQF	126	0.00164754		TRBV5	TRBJ1-5	CASSQVSQNNQAPPF	64	0.00091396		TRBV1	TRBJ2-7	CSGDRSYGQYF	59	0.000951597		TRBV13-2	TRBJ2-1	CTCSAGHNNYAEQF	82	0.00101259
TRBV1	TRBJ1-1	CSAAVANTEGF	244	0.00330724		TRBV13-2	TRBJ1-3	CASGDRDSGNTLYF	126	0.00164754		TRBV30	TRBJ2-7	CSSGDRDWGDEQYF	64	0.00091396		TRBV1	TRBJ2-3	CSADRPSAETPYF	59	0.000951597		TRBV13-2	TRBJ2-1	CASSSGHNNYAEQF	82	0.00101259
TRBV20	TRBJ2-5	CGARPWDQDTQYF	243	0.00329369		TRBV13-1	TRBJ2-3	CASGDGGRRAETLYF	126	0.00164754		TRBV30	TRBJ2-7	CSSGDCGQYF	64	0.00091396		TRBV1	TRBJ2-3	CSADKAGGAETLYF	59	0.000951597		TRBV13-1	TRBJ2-5	CASGDARGVNQDTQYF	82	0.00101259
TRBV29	TRBJ1-1	CASSLTRPSNTEVF	242	0.00328014		TRBV12-1	TRBJ1-5	CASSYRGEGGNQAPLF	126	0.00164754		TRBV1	TRBJ2-5	CSDWGGAQGTQYF	64	0.00091396		TRBV1	TRBJ2-3	CSADGPSAETLYF	59	0.000951597		TRBV13-1	TRBJ2-1	CASSGGGNYAEQF	82	0.00101259
TRBV1	TRBJ2-7	CSATDSPYEQYF	242	0.00328014		TRBV3	TRBJ1-3	CASSLWDSGNTLYF	125	0.00163447		TRBV1	TRBJ2-5	CSAGTSQDTQYF	64	0.00091396		TRBV1	TRBJ1-4	CSAEPISNERLLF	59	0.000951597		TRBV13-1	TRBJ2-1	CASGVGAGAEQF	82	0.00101259
TRBV1	TRBJ1-6	CSTPGHFNSYNSPLYF	242	0.00328014		TRBV29	TRBJ1-4	CASSLSVGSSNERLF	125	0.00163447		TRBV1	TRBJ2-5	CSAGNQDTRYF	64	0.00091396		TRBV1	TRBJ1-3	CSAVGQGAGNTPYF	59	0.000951597		TRBV13-1	TRBJ2-1	CAGSDDRTGLSEQF	82	0.00101259
TRBV13-3	TRBJ1-3	CASSDFSGNTLYF	241	0.00326658		TRBV15	TRBJ1-4	CASSLGNEGLF	125	0.00163447		TRBV1	TRBJ2-4	CSGTGGASQNTLYF	64	0.00091396		TRBV1	TRBJ1-1	CSVDIANTEVLF	59	0.000951597		TRBV5	TRBJ1-4	CASSDGDRNERLF	81	0.00100024
TRBV13-2	TRBJ1-3	CASGDAYSGNTLYF	241	0.00326658		TRBV1	TRBJ2-3	CSADPAETPYF	124	0.00162139		TRBV1	TRBJ2-3	CTRSGRQAETLYF	64	0.00091396		TRBV1	TRBJ1-1	CSEQGRDTEVLF	59	0.000951597		TRBV5	TRBJ1-1	CAISLKTNSNTEVF	81	0.00100024
TRBV5	TRBJ1-1	CASSLTGPSNTEVF	240	0.00325303		TRBV13-2	TRBJ2-1	CASSPWGGDYAEQF	124	0.00162139		TRBV1	TRBJ2-2	CSADWGDTGQLHF	64	0.00091396		TRBV1	TRBJ1-1	CSEQERDTEVF	59	0.000951597		TRBV4	TRBJ1-3	CASSSSGAGNTLYF	81	0.00100024
TRBV1	TRBJ2-3	CSARLGEFAETLYF	240	0.00325303		TRBV13-1	TRBJ1-2	CASSDKDNSDYTF	124	0.00162139		TRBV1	TRBJ2-1	CTRSARTGGVNYAEQF	64	0.00091396		TRBV1	TRBJ1-1	CSAEGGGVF	59	0.000951597		TRBV30	TRBJ1-4	CSSTAAFSNEK_SF	81	0.00100024
TRBV1	TRBJ1-6	CSAPGHFNSYNSSLYF	239	0.00323947		TRBV29	TRBJ1-1	CASSMKGQANTEVF	123	0.00160832		TRBV1	TRBJ2-1	CTRSADGGRAEQF	64	0.00091396		TRBV1	TRBJ1-1	CSADANNEVF	59	0.000951597		TRBV26	TRBJ2-1	CASGRDYAEQF	81	0.00100024
TRBV1	TRBJ1-6	CSAPEHFNSYNSPLYF	236	0.00319881		TRBV1	TRBJ1-1	CGAERGNTEVF	123	0.00160832		TRBV1	TRBJ1-4	CSADRVGSNERLF	64	0.00091396		TRBV1	TRBJ1-1	CNADGRNTEVF	59	0.000951597		TRBV26	TRBJ1-2	CASSPGTANSDYTF	81	0.00100024
TRBV14	TRBJ2-1	CASSRDWGGGAEQF	236	0.00319881		TRBV13-3	TRBJ2-1	CVSSARLGAEQF	123	0.00160832		TRBV1	TRBJ1-1	CSAGREVLF	64	0.00091396		TRBV15	TRBJ2-5	CASSQDWGPQDTQYF	59	0.000951597		TRBV1	TRBJ2-7	CSAGRFSYEQYF	81	0.00100024
TRBV5	TRBJ2-4	CASSQAGGGGSSQNTLYF	234	0.0031717		TRBV3	TRBJ2-1	CASSFRQGYAEQLF	122	0.00159524		TRBV1	TRBJ1-1	CSAGGGDTEVLF	64	0.00091396		TRBV15	TRBJ2-5	CASNRGDTQYF	59	0.000951597		TRBV1	TRBJ2-7	CSADLGGNEQCF	81	0.00100024
TRBV1	TRBJ2-4	CSANSGENTLYF	232	0.00314459		TRBV20	TRBJ2-7	CGARTGPSYEQYF	122	0.00159524		TRBV1	TRBJ1-1	CSAGGGDAEVF	64	0.00091396		TRBV15	TRBJ2-1	CASSTTGERAEQF	59	0.000951597		TRBV1	TRBJ2-5	CSAGLGGQDTQYF	81	0.00100024
TRBV13-3	TRBJ1-1	CASSDGQGARDTEVF	232	0.00314459		TRBV13-2	TRBJ2-5	CASSGDREGTQYF	122	0.00159524		TRBV1	TRBJ1-1	CSAGDNTEAF	64	0.00091396		TRBV15	TRBJ2-1	CASSPWDWGYAEHF	59	0.000951597		TRBV1	TRBJ2-5	CSAEGQDTRYF	81	0.00100024
TRBV13-2	TRBJ2-1	CASSAQGADAEQF	230	0.00311748		TRBV13-2	TRBJ1-1	CASSDADRTNTEVF	122	0.00159524		TRBV1	TRBJ1-1	CSADINTGVF	64	0.00091396		TRBV13-3	TRBJ2-5	CASSRAGVQDTQYF	59	0.000951597		TRBV1	TRBJ2-4	CSGDNSPNTLYF	81	0.00100024
TRBV29	TRBJ1-1	CTSSLTGPSNTEVF	228	0.00309038		TRBV5	TRBJ2-5	CASRKGDRDTQYF	121	0.00158216		TRBV13-2	TRBJ2-7	CASSQGLGVSYEQYF	64	0.00091396		TRBV13-2	TRBJ2-3	CAWKYGGAETLYF	59	0.000951597		TRBV1	TRBJ2-1	CSADAGAEQF	81	0.00100024
TRBV16	TRBJ2-3	CASSSDSQASAETLYF	228	0.00309038		TRBV1	TRBJ2-1	CTRSRDRYYAEQF	121	0.00158216		TRBV13-2	TRBJ2-7	CASGGGLGGYEQYF	64	0.00091396		TRBV13-1	TRBJ2-7	CASGSGGEEQYF	59	0.000951597		TRBV1	TRBJ1-6	CSAGQYNSPLHF	81	0.00100024
TRBV23	TRBJ2-1	CSSSQYRDNYAEQF	227	0.00307682		TRBV1	TRBJ2-1	CSRDGYYAEQF	121	0.00158216		TRBV13-2	TRBJ2-5	CASTLGVNQDTQYF	64	0.00091396		TRBV13-1	TRBJ2-7	CASGDARAGEQYF	59	0.000951597		TRBV13-3	TRBJ2-5	CASSDRDRDTQYF	81	0.00100024
TRBV15	TRBJ2-5	CASSLAGDEQYF	226	0.00306327		TRBV13-2	TRBJ1-4	CASRAGTGSNERLF	121	0.00158216		TRBV13-2	TRBJ2-1	CASSRDWGETYAERF	64	0.00091396		TRBV12-1	TRBJ2-7	CASSLDKSYVQYF	59	0.000951597		TRBV13-3	TRBJ1-1	CVSSGTSTEVF	81	0.00100024
TRBV31	TRBJ2-3	CAWSLRGRAETLYF	225	0.00304971		TRBV13-2	TRBJ1-2	CASSDAWGRNSDYTF	121	0.00158216		TRBV13-2	TRBJ1-4	CASGERQGNEQYF	64	0.00091396		TRBV12-1	TRBJ1-4	CASSSSRDRNERLF	59	0.000951597		TRBV13-1	TRBJ2-7	CASSLGYEQYF	81	0.00100024
TRBV1	TRBJ1-6	CSAPGHFNSYNSLLYF	225	0.00304971		TRBV5	TRBJ2-7	CASSVRDWGSYEQYF	120	0.00156909		TRBV13-2	TRBJ1-4	CASGDAANERLF	64	0.00091396		TRBV12-1	TRBJ1-2	CASSGTANSDYTF	59	0.000951597		TRBV5	TRBJ1-6	CASGGRQYNSPLYF	80	0.000987894
TRBV12-1	TRBJ2-5	CASSLGTEDTQYF	224	0.00303616		TRBV1	TRBJ2-4	CSAEDSGQNTLYF	120	0.00156909		TRBV13-2	TRBJ1-4	CASDDASNERLF	64	0.00091396		TRBV5	TRBJ1-3	CASSPRGVSGNTLYF	58	0.000935469		TRBV5	TRBJ1-1	CASSLKPNSNTEVF	80	0.000987894
TRBV5	TRBJ2-3	CASSQDLTGASAEALYF	223	0.00302261		TRBV13-2	TRBJ1-1	CASSGGTGTEVF	120	0.00156909		TRBV13-2	TRBJ1-2	CASSQDGTANSDYTF	64	0.00091396		TRBV29	TRBJ2-5	CASNRGDTRYF	58	0.000935469		TRBV2	TRBJ1-3	CASERWGPGNTLYF	80	0.000987894
TRBV5	TRBJ2-3	CASGQDLTGASAETLYF	223	0.00302261		TRBV1	TRBJ2-5	CSAARGQDTQYF	119	0.00155601		TRBV13-2	TRBJ1-1	CASGGGRSNTEVF	64	0.00091396		TRBV1	TRBJ2-7	CTRSAEQEQYF	58	0.000935469		TRBV26	TRBJ2-5	CASSPNRDTQYF	80	0.000987894
TRBV13-2	TRBJ2-7	CASSDPTGSSYEQYF	223	0.00302261		TRBV1	TRBJ2-4	CTRSKLGASQNTLYF	119	0.00155601		TRBV13-1	TRBJ2-3	CASSLQGSSAETLYF	64	0.00091396		TRBV1	TRBJ2-3	CSADRARGAETLYF	58	0.000935469		TRBV26	TRBJ1-1	CASSPTGPNTEVF	80	0.000987894
TRBV31	TRBJ2-7	CAWSLETGEQHF	220	0.00298194		TRBV1	TRBJ2-3	CTRSADPAETLYF	119	0.00155601		TRBV13-1	TRBJ2-2	CASRQASTGQLYF	64	0.00091396		TRBV1	TRBJ1-4	CSAEPIPNERLF	58	0.000935469		TRBV1	TRBJ2-7	CSAGTYEQYF	80	0.000987894
TRBV13-2	TRBJ1-5	CASGDTNNDQAPLF	220	0.00298194		TRBV13-2	TRBJ1-1	CASGQGNTEVF	119	0.00155601		TRBV13-1	TRBJ1-4	CASGDAFGGISNERLF	64	0.00091396		TRBV1	TRBJ1-1	CSAPGTDGTEAF	58	0.000935469		TRBV1	TRBJ2-1	CSASQSNYAEQLF	80	0.000987894
TRBV1	TRBJ1-6	CNAPGHFNSYNSPLYF	219	0.00296839		TRBV1	TRBJ2-7	CTRSPGQIIYEQYF	118	0.00154294		TRBV5	TRBJ2-7	CASSQVGGSYEQYF	63	0.00089968		TRBV15	TRBJ2-4	CASSSSQSTLYF	58	0.000935469		TRBV1	TRBJ1-6	CGAGQRNSPLYF	80	0.000987894
TRBV29	TRBJ1-2	CASSYQNSDYTF	218	0.00295483		TRBV1	TRBJ2-3	CSAGPGSSAETLYF	118	0.00154294		TRBV5	TRBJ2-5	CASSQGSQDTQYF	63	0.00089968		TRBV15	TRBJ2-4	CASSAGTKDTLYF	58	0.000935469		TRBV1	TRBJ1-4	CSAGQLSSERLF	80	0.000987894
TRBV17	TRBJ2-7	CASSRGPYEQYF	218	0.00295483		TRBV13-2	TRBJ1-1	CASSDALGTEVF	118	0.00154294		TRBV5	TRBJ2-5	CASSQDPPGGREQYF	63	0.00089968		TRBV15	TRBJ2-1	CAGSFRDWGYAEQF	58	0.000935469		TRBV1	TRBJ1-1	CGVSGGVTEVF	80	0.000987894
TRBV15	TRBJ1-3	CASSPPGSGNTLHF	218	0.00295483		TRBV12-2	TRBJ2-3	CASSLGTSAETLYF	118	0.00154294		TRBV5	TRBJ2-2	CASSQENWGGTGQLYF	63	0.00089968		TRBV15	TRBJ1-4	CASSLSHFSNGRLF	58	0.000935469		TRBV15	TRBJ1-1	CASSQGTTNTEVF	80	0.000987894
TRBV26	TRBJ1-5	CASSRDRDNQAPLF	216	0.00292773		TRBV13-2	TRBJ2-4	CASG_LGSQNTLYF	117	0.00152986		TRBV1	TRBJ2-5	CGGTGGARDTQYF	63	0.00089968		TRBV15	TRBJ1-3	CASSLDGNTLYF	58	0.000935469		TRBV14	TRBJ1-6	CASSFGTGGAGSPPYF	80	0.000987894
TRBV14	TRBJ2-4	CASSLGGQSTLYF	216	0.00292773		TRBV13-1	TRBJ1-2	CR_DIFQVNFQVSLRTKHVLRVHIRVSVF_CANSDYTF	117	0.00152986		TRBV1	TRBJ2-2	CTRSAQGSTGQLYF	63	0.00089968		TRBV13-2	TRBJ2-1	CASSEGNNYAEQF	58	0.000935469		TRBV13-3	TRBJ2-3	CASSDARGPSVETLYF	80	0.000987894
TRBV13-2	TRBJ2-3	CASSQDLTGASAETLYF	213	0.00288706		TRBV5	TRBJ2-4	CAGLGEQNTLYF	116	0.00151678		TRBV1	TRBJ2-1	CSRGGYAEQF	63	0.00089968		TRBV13-2	TRBJ2-1	CASGTGAEQSF	58	0.000935469		TRBV13-2	TRBJ1-4	CASGAPTGPNERLF	80	0.000987894
TRBV13-1	TRBJ1-5	CASSDARNNNQAPLF	212	0.00287351		TRBV26	TRBJ2-3	CAGSLAHAETLYF	116	0.00151678		TRBV1	TRBJ1-4	CSGDRTSNERLF	63	0.00089968		TRBV13-1	TRBJ2-7	CASSDEGGEQYF	58	0.000935469		TRBV13-1	TRBJ1-5	CASSGPTNNNQAPLF	80	0.000987894
TRBV1	TRBJ1-6	CSAPGHFNSYDSPLYF	211	0.00285995		TRBV24	TRBJ2-7	CASSLGQSYEQYF	116	0.00151678		TRBV1	TRBJ1-1	CTYSPGQSNTEVF	63	0.00089968		TRBV13-1	TRBJ1-6	CASSDSGDSPLYF	58	0.000935469		TRBV5	TRBJ2-7	CASNQGGREQYF	79	0.000975546
TRBV29	TRBJ1-1	CVSSLTGPSNTEVF	210	0.0028464		TRBV24	TRBJ1-6	CASSPGRNSPLYF	116	0.00151678		TRBV1	TRBJ1-1	CT_SAAQGNTEVF	63	0.00089968		TRBV13-1	TRBJ1-6	CASSDPGDSPLYF	58	0.000935469		TRBV5	TRBJ1-1	CASRRDRGGEVF	79	0.000975546
TRBV20	TRBJ2-7	CGAGRGGISYEQYF	210	0.0028464		TRBV1	TRBJ2-4	CSKLGASQSTLYF	116	0.00151678		TRBV1	TRBJ1-1	CSVGQGSTEVF	63	0.00089968		TRBV31	TRBJ2-1	CARTWGVNYAEQF	57	0.00091934		TRBV5	TRBJ1-1	CADRNTEVF	79	0.000975546
TRBV20	TRBJ1-3	CGARDSSGNTLYF	210	0.0028464		TRBV1	TRBJ2-2	CSWTGGNTGQLYF	116	0.00151678		TRBV1	TRBJ1-1	CSVDINTEVF	63	0.00089968		TRBV1	TRBJ2-5	CSAVNRDTQYF	57	0.00091934		TRBV30	TRBJ2-5	CSSSRNNRDTQYF	79	0.000975546
TRBV16	TRBJ2-5	CASSPGTEDTQHF	209	0.00283285		TRBV1	TRBJ2-1	CSRGRYYAEQF	116	0.00151678		TRBV13-3	TRBJ2-1	CASSDQSYAGQF	63	0.00089968		TRBV1	TRBJ2-4	CTRSADQDWGGWQNTLYF	57	0.00091934		TRBV26	TRBJ1-2	CASGLGTANSDYTF	79	0.000975546
TRBV29	TRBJ1-1	CASSLTEPSNTEVF	208	0.00281929		TRBV1	TRBJ1-6	CSAG_DNSPLYF	116	0.00151678		TRBV13-2	TRBJ2-7	CASSQDQRGEQYF	63	0.00089968		TRBV1	TRBJ2-4	CSADQDRGGWQNTLYF	57	0.00091934		TRBV1	TRBJ2-4	CGADRGQNTLYF	79	0.000975546
TRBV15	TRBJ2-3	CASSLSPAETLYF	207	0.00280574		TRBV13-3	TRBJ2-7	CASSDAAQGYEQYF	116	0.00151678		TRBV13-2	TRBJ2-3	CTCSAGQTSAETLYF	63	0.00089968		TRBV1	TRBJ1-4	CSAEPISNGRLF	57	0.00091934		TRBV1	TRBJ1-1	CGADGANTEVF	79	0.000975546
TRBV12-1	TRBJ2-5	CASSLPGQAQDTQYF	206	0.00279218		TRBV26	TRBJ2-3	CASSPQTSAETLYF	115	0.00150371		TRBV13-1	TRBJ1-1	CAGSEGQRNTEVF	63	0.00089968		TRBV1	TRBJ1-1	CTRSGDKNTEVF	57	0.00091934		TRBV16	TRBJ1-1	CASSLVGTDTEVSF	79	0.000975546
TRBV29	TRBJ1-1	CASSLTGLSNTEVF	205	0.00277863		TRBV1	TRBJ2-3	CGVRSSAETLYF	115	0.00150371		TRBV5	TRBJ2-3	CASGDQLGGSAETLYF	62	0.000885399		TRBV1	TRBJ1-1	CSEQGGDTEVF	57	0.00091934		TRBV13-3	TRBJ2-7	CASSPGTGGYEQYF	79	0.000975546
TRBV23	TRBJ2-5	CSSSWGEVGQDTQYF	202	0.00273797		TRBV1	TRBJ2-1	CGRDRYYAEQF	115	0.00150371		TRBV5	TRBJ2-2	CASSQDGAGQLYF	62	0.000885399		TRBV1	TRBJ1-1	CSADG_NTEVF	57	0.00091934		TRBV13-3	TRBJ2-7	CASSGQGRSYEQYF	79	0.000975546
TRBV13-2	TRBJ2-7	CASSDAAGGSYEQYF	202	0.00273797		TRBV1	TRBJ1-1	CTRSAGQEVF	115	0.00150371		TRBV5	TRBJ1-2	CAGSQDGTANSDYTF	62	0.000885399		TRBV16	TRBJ2-4	CASSLGSGGQNTLYF	57	0.00091934		TRBV13-3	TRBJ2-3	CASSDTRGPSAETLYF	79	0.000975546
TRBV23	TRBJ2-7	CSSSQDLSYEQYF	201	0.00272441		TRBV5	TRBJ2-2	CASSQDRLSTRQLYF	114	0.00149063		TRBV1	TRBJ2-7	CSVRDWGDEQYF	62	0.000885399		TRBV15	TRBJ1-4	CASSLESISNERLF	57	0.00091934		TRBV13-2	TRBJ2-5	CTSGEGTGQDTQYF	79	0.000975546
TRBV20	TRBJ1-2	CGARGGETDYTF	201	0.00272441		TRBV1	TRBJ2-2	CSATGNTGQLYF	114	0.00149063		TRBV1	TRBJ2-7	CRAVSGGVYEQYF	62	0.000885399		TRBV13-3	TRBJ1-6	CASSENSYNSPLHF	57	0.00091934		TRBV13-2	TRBJ2-5	CASSLEGRGQDTQYF	79	0.000975546
TRBV1	TRBJ1-6	CSAPGHFNSYNSPF	201	0.00272441		TRBV1	TRBJ2-5	CSAAWGQDAQYF	113	0.00147756		TRBV1	TRBJ2-5	CSADLGDQDAQYF	62	0.000885399		TRBV13-2	TRBJ2-7	CASSVTINYEQYF	57	0.00091934		TRBV13-2	TRBJ2-5	CASSLDGGQDTQYF	79	0.000975546
TRBV17	TRBJ2-2	CASSRSQGVTGQLYF	201	0.00272441		TRBV1	TRBJ2-5	CGGLEDTQYF	113	0.00147756		TRBV1	TRBJ2-4	CKQTGDQSTLYF	62	0.000885399		TRBV13-1	TRBJ2-7	CASRGLGGEQYF	57	0.00091934		TRBV13-2	TRBJ2-5	CASGEGTGQDTRYF	79	0.000975546
TRBV13-1	TRBJ1-4	CASSAGTVNERLF	201	0.00272441		TRBV1	TRBJ2-4	CSGSQDTLYF	113	0.00147756		TRBV1	TRBJ2-1	CSADGLGGHAEQF	62	0.000885399		TRBV13-1	TRBJ1-1	CASSGTGYTEVF	57	0.00091934		TRBV13-2	TRBJ1-2	CTSGDRADYTF	79	0.000975546
TRBV12-1	TRBJ1-6	CARWDDSPLYF	198	0.00268375		TRBV1	TRBJ2-1	CSRDRYYAGQF	113	0.00147756		TRBV1	TRBJ1-6	CSTDPTDNSPLYF	62	0.000885399		TRBV12-1	TRBJ2-5	CASSLDWGVEDTQYF	57	0.00091934		TRBV5	TRBJ2-4	CANMSQGRTLYCTCSGDNSQNTLYF	78	0.000963197
TRBV13-3	TRBJ2-3	CASSQDLTGASAETLYF	197	0.00267019		TRBV13-3	TRBJ2-7	CASSDASQGYEHYF	113	0.00147756		TRBV1	TRBJ1-2	CSVQGSCSDHTF	62	0.000885399		TRBV12-1	TRBJ2-3	CASSPLQGAETLYF	57	0.00091934		TRBV5	TRBJ2-1	CASRDNYAEQF	78	0.000963197
TRBV15	TRBJ2-2	CAGSFAGQLYF	196	0.00265664		TRBV13-2	TRBJ2-1	CASSVINYAEQF	113	0.00147756		TRBV13-2	TRBJ2-3	CTCSAEGGGPSAETLYF	62	0.000885399		TRBV12-1	TRBJ2-1	CASSLWDNYAEQF	57	0.00091934		TRBV5	TRBJ1-4	CASSRGRGERLF	78	0.000963197
TRBV13-3	TRBJ1-1	CASSLTGPSNTEVF	196	0.00265664		TRBV31	TRBJ2-4	CSAGLGEQNTLYF	112	0.00146448		TRBV13-1	TRBJ2-4	CASSDAKGGSQNALYF	62	0.000885399		TRBV12-1	TRBJ2-1	CASSLGVEQF	57	0.00091934		TRBV5	TRBJ1-4	CASSQGGTIF	78	0.000963197
TRBV13-2	TRBJ2-4	CASSDAGGSQNTLYF	196	0.00265664		TRBV26	TRBJ2-5	CASGHPGQGQDTQYF	112	0.00146448		TRBV13-1	TRBJ1-3	CASGGGGHFSGNTLYF	62	0.000885399		TRBV12-1	TRBJ1-4	CASSPGTGYERLF	57	0.00091934		TRBV5	TRBJ1-1	CASSQTGGEGAEVF	78	0.000963197
TRBV29	TRBJ1-6	CASRPGYSYNSPF	195	0.00264309		TRBV24	TRBJ2-7	CILEILSSEEDDSALYLRASSPGTGYEQYF	112	0.00146448		TRBV5	TRBJ2-7	CASSQDQRGGQYF	61	0.000871118		TRBV12-1	TRBJ1-1	CASSGTGYTEVF	57	0.00091934		TRBV26	TRBJ2-7	CASSPGLFYEQYF	78	0.000963197
TRBV15	TRBJ1-5	CASRPGTGRNQAPLF	195	0.00264309		TRBV13-3	TRBJ2-7	CASSDFSSYEQYF	112	0.00146448		TRBV5	TRBJ2-5	CASTLGVNQDTQYF	61	0.000871118		TRBV5	TRBJ2-4	CASSFGSGGQNTLYF	56	0.000903211		TRBV26	TRBJ2-7	CASSGTGYEQYF	78	0.000963197
TRBV20	TRBJ2-7	CGALRGDEQYF	194	0.00262953		TRBV13-3	TRBJ2-7	CASRGRSSYEQYF	112	0.00146448		TRBV5	TRBJ2-5	CASSQDDGRDTQYF	61	0.000871118		TRBV5	TRBJ1-5	CTSSQDLSYNNQAPLF	56	0.000903211		TRBV26	TRBJ2-1	CASSQARDRYAEQF	78	0.000963197
TRBV20	TRBJ1-2	CGARSLTANSDYTF	194	0.00262953		TRBV13-2	TRBJ1-4	CASRAHNERLF	112	0.00146448		TRBV5	TRBJ2-3	CASSQDRDRGAEALYF	61	0.000871118		TRBV3	TRBJ2-7	CASSLDWAGSYERYF	56	0.000903211		TRBV26	TRBJ2-1	CASGLTGAGAEQF	78	0.000963197
TRBV29	TRBJ2-4	CVSSLSPENTLYF	190	0.00257531		TRBV12-1	TRBJ2-2	CASSLGQGDTGQPYF	112	0.00146448		TRBV5	TRBJ2-3	CANMSQGRTLYCTCSAEGGGPSAETLYF	61	0.000871118		TRBV31	TRBJ2-7	CAWRRTGPERYF	56	0.000903211		TRBV26	TRBJ1-2	CAGSLRANSDYTF	78	0.000963197
TRBV17	TRBJ2-2	CASSSWGATGQLYF	190	0.00257531		TRBV12-1	TRBJ2-1	CANSLLQGYAEQF	112	0.00146448		TRBV5	TRBJ1-1	CASGQGRDTEVF	61	0.000871118		TRBV29	TRBJ2-5	CASSSQGEQYF	56	0.000903211		TRBV1	TRBJ2-7	CSADAYEQYF	78	0.000963197
TRBV17	TRBJ2-7	CASSSQYEQYF	189	0.00256176		TRBV26	TRBJ2-3	CASSLAHAETPYF	111	0.00145141		TRBV31	TRBJ1-6	CSADRDSYNSPLYF	61	0.000871118		TRBV1	TRBJ2-4	CGADRLGVSQNTLYF	56	0.000903211		TRBV1	TRBJ2-5	CSPGPGGQDTQYF	78	0.000963197
TRBV13-2	TRBJ1-4	CASGSNERLF	189	0.00256176		TRBV26	TRBJ2-1	CASSPGLGGYAEQF	111	0.00145141		TRBV31	TRBJ1-6	CAWSRGVNSPPYF	61	0.000871118		TRBV15	TRBJ2-7	CASSLETGGGEQYF	56	0.000903211		TRBV1	TRBJ2-5	CSAVDRGLDTRYF	78	0.000963197
TRBV29	TRBJ2-7	CASRPRQYEQYF	188	0.00254821		TRBV1	TRBJ2-7	CTRSAEGDLYEQYF	111	0.00145141		TRBV1	TRBJ2-7	CTRSGGQGAYEQYF	61	0.000871118		TRBV15	TRBJ2-1	CASRSAGGYNYAEQF	56	0.000903211		TRBV1	TRBJ2-4	CSGDNSQNTMYF	78	0.000963197
TRBV20	TRBJ2-7	CGAREGYEQYF	187	0.00253465		TRBV1	TRBJ1-2	CTRSADKGANSDYTF	111	0.00145141		TRBV1	TRBJ2-7	CSADWGSYGQYF	61	0.000871118		TRBV15	TRBJ1-4	CASGLSHFSNERLF	56	0.000903211		TRBV1	TRBJ2-1	CSAGHNNYVEQF	78	0.000963197
TRBV13-3	TRBJ1-3	CASRPGGSGNTLYF	187	0.00253465		TRBV13-3	TRBJ2-7	CASSRTGGKVYEQYF	111	0.00145141		TRBV1	TRBJ2-7	CSADGAIEQYF	61	0.000871118		TRBV13-2	TRBJ2-7	CASSRDKTYEQYF	56	0.000903211		TRBV1	TRBJ1-5	CRADQEAPLF	78	0.000963197
TRBV5	TRBJ2-2	CASSAGTGNTGQLYF	186	0.0025211		TRBV13-3	TRBJ2-7	CASSAASQGYEQYF	111	0.00145141		TRBV1	TRBJ2-7	CIADRGGYEQYF	61	0.000871118		TRBV13-2	TRBJ2-7	CASHRGRVYEQYF	56	0.000903211		TRBV1	TRBJ1-4	CMALSDERLF	78	0.000963197
TRBV5	TRBJ2-5	CASSQEGEDT_YF	185	0.00250754		TRBV13-2	TRBJ1-4	CASSGDRSNERLF	111	0.00145141		TRBV1	TRBJ2-5	CSGAGGARDTQYF	61	0.000871118		TRBV13-2	TRBJ2-5	CASSQDWGPQDTQYF	56	0.000903211		TRBV1	TRBJ1-2	CRGPDCTF	78	0.000963197
TRBV31	TRBJ1-4	CAWSPGNERLF	184	0.00249399		TRBV5	TRBJ2-3	CASRRLGTSAEALYF	110	0.00143833		TRBV1	TRBJ2-4	CSADPTKTSQNALYF	61	0.000871118		TRBV13-2	TRBJ2-5	CALPSGTGGDQDTQYF	56	0.000903211		TRBV15	TRBJ1-1	CASSLDSANTEVF	78	0.000963197
TRBV20	TRBJ1-3	CGVPTGRSGNTLYF	184	0.00249399		TRBV15	TRBJ1-4	CASSNRGRHERLF	110	0.00143833		TRBV1	TRBJ2-2	CSPGGARTGQPYF	61	0.000871118		TRBV13-2	TRBJ2-3	CTCSADRAGGAETLYF	56	0.000903211		TRBV13-3	TRBJ2-3	CASGDERVGAETLYF	78	0.000963197
TRBV29	TRBJ1-1	CASRLTGPSNTEVF	183	0.00248043		TRBV13-2	TRBJ2-4	CASGRQDTLYF	110	0.00143833		TRBV1	TRBJ2-2	CSLGGPNTGQLYF	61	0.000871118		TRBV13-2	TRBJ1-5	CASSDADQAPLF	56	0.000903211		TRBV13-2	TRBJ2-1	CASSLTGAGAGQF	78	0.000963197
TRBV13-1	TRBJ1-6	CASSGWDRGHHSPLYF	183	0.00248043		TRBV13-2	TRBJ2-1	CASSGGLAEQYF	110	0.00143833		TRBV1	TRBJ2-2	CSARTSNTGQLYF	61	0.000871118		TRBV13-2	TRBJ1-1	CASSPGTDANTEVF	56	0.000903211		TRBV13-2	TRBJ1-2	CASSTTTNSDYTF	78	0.000963197
TRBV5	TRBJ2-3	CASRQDLTGASAETLYF	182	0.00246688		TRBV12-1	TRBJ2-5	CASGQQDTQYF	110	0.00143833		TRBV1	TRBJ2-2	CSAGWGDTGQLYF	61	0.000871118		TRBV13-1	TRBJ2-3	CASSDRGTGSSAETLYF	56	0.000903211		TRBV13-1	TRBJ1-1	CASSDVGEVLF	78	0.000963197
TRBV13-3	TRBJ2-4	CASNPGLGGRQNTLYF	182	0.00246688		TRBV12-1	TRBJ1-2	CASSLAGLNSDYTF	110	0.00143833		TRBV1	TRBJ2-2	CSAGTSSTGQLYF	61	0.000871118		TRBV13-1	TRBJ1-6	CASSEAGDSPLYF	56	0.000903211		TRBV5	TRBJ2-5	CASSQDGGVQDTQCF	77	0.000950848
TRBV16	TRBJ2-1	CASSWGGGYAEQSF	180	0.00243977		TRBV5	TRBJ2-2	CASSPHWGGNTGQLYF	109	0.00142525		TRBV1	TRBJ2-2	CSAGASNTGQLYF	61	0.000871118		TRBV13-1	TRBJ1-1	CASSGTGGAEVF	56	0.000903211		TRBV5	TRBJ1-6	CASSLGDNNSPLYF	77	0.000950848
TRBV13-1	TRBJ2-5	CASGPTGGNQDTQYF	180	0.00243977		TRBV26	TRBJ1-1	CASSLTRGHTEAF	109	0.00142525		TRBV1	TRBJ2-1	CSAEGGRAEQF	61	0.000871118		TRBV12-1	TRBJ2-7	CASSVTINYEQYF	56	0.000903211		TRBV5	TRBJ1-5	CASRDTNNQAPLF	77	0.000950848
TRBV29	TRBJ1-1	CANSLTGPSNTEVF	179	0.00242622		TRBV1	TRBJ2-4	CSA_LGEQNTLYF	109	0.00142525		TRBV1	TRBJ2-1	CSADLGGNYAEQF	61	0.000871118		TRBV12-1	TRBJ2-7	CASSDVGYEQYF	56	0.000903211		TRBV5	TRBJ1-1	CASSRGQGDTEVF	77	0.000950848
TRBV17	TRBJ1-1	CASSRDRGTEVF	179	0.00242622		TRBV16	TRBJ1-1	CASSTDRGVITEVF	109	0.00142525		TRBV1	TRBJ2-1	CSADGGGAEQF	61	0.000871118		TRBV12-1	TRBJ2-7	CASSDGQQYF	56	0.000903211		TRBV5	TRBJ1-1	CASSLKTNSNTEVCF	77	0.000950848
TRBV29	TRBJ1-1	CASSLTGPSNIEVF	177	0.00239911		TRBV13-3	TRBJ2-5	CASTAGGDEQYF	109	0.00142525		TRBV1	TRBJ1-4	CSGDRIPNERLF	61	0.000871118		TRBV12-1	TRBJ2-7	CASPRDKTYEQYF	56	0.000903211		TRBV4	TRBJ1-6	CASSRQVYNSPLYF	77	0.000950848
TRBV17	TRBJ2-3	CASSRGGRFAETLYF	177	0.00239911		TRBV12-1	TRBJ2-7	CASSLDWGYERYF	109	0.00142525		TRBV1	TRBJ1-4	CSADWGRDEK_SF	61	0.000871118		TRBV12-1	TRBJ2-3	CARGRRIAETLYF	56	0.000903211		TRBV30	TRBJ2-5	CSSGRNNQDTQYF	77	0.000950848
TRBV13-2	TRBJ2-3	CASSDISAETLYF	177	0.00239911		TRBV13-2	TRBJ2-5	CASSLTGTQDTQYF	108	0.00141218		TRBV1	TRBJ1-4	CSADRIGSNEGLF	61	0.000871118		TRBV12-1	TRBJ1-2	CAGSLGTTNSDYTF	56	0.000903211		TRBV30	TRBJ2-5	CSPSRNNQDTQYF	77	0.000950848
TRBV29	TRBJ2-7	CASSITGSSYEQYF	176	0.00238555		TRBV13-2	TRBJ2-2	CASGLQGDTGQLYF	108	0.00141218		TRBV1	TRBJ1-3	CSGTGAGNTPYF	61	0.000871118		TRBV5	TRBJ1-5	CASSQDLSCNNQAPLF	55	0.000887082		TRBV26	TRBJ2-7	CASSLYKMGGSYEQYF	77	0.000950848
TRBV29	TRBJ1-1	CASSLMGPSNTEVF	175	0.002372		TRBV13-2	TRBJ1-3	CASGNREPYSGNTLYF	108	0.00141218		TRBV1	TRBJ1-1	CTRSAGGGDTEVF	61	0.000871118		TRBV5	TRBJ1-5	CASSQDLNYNNQAPLF	55	0.000887082		TRBV26	TRBJ2-1	CAGSRDYAEQF	77	0.000950848
TRBV1	TRBJ2-1	CTRSDRGHNYAEQF	175	0.002372		TRBV26	TRBJ2-4	CSAGLGEQNTLYF	107	0.0013991		TRBV1	TRBJ1-1	CSVGQGNTEVLF	61	0.000871118		TRBV5	TRBJ1-1	CASSPGTDANTEVF	55	0.000887082		TRBV26	TRBJ1-3	CASSLSLRGNSGNTLYF	77	0.000950848
TRBV29	TRBJ1-2	CASRLGQTNSDYTF	174	0.00235845		TRBV1	TRBJ2-7	CSEGYEQYF	107	0.0013991		TRBV1	TRBJ1-1	CSVGQGDTEVF	61	0.000871118		TRBV3	TRBJ2-7	CASSPDKTYEQYF	55	0.000887082		TRBV1	TRBJ2-7	CSAPGGYEQCF	77	0.000950848
TRBV15	TRBJ2-5	CASSPTGDEQYF	174	0.00235845		TRBV13-3	TRBJ2-5	CASSDKGGRNTQCF	107	0.0013991		TRBV13-2	TRBJ2-4	CASGDESSQNTSYF	61	0.000871118		TRBV29	TRBJ2-1	CASSADRANYAEQF	55	0.000887082		TRBV1	TRBJ2-5	CSANQSGGGTQYF	77	0.000950848
TRBV13-2	TRBJ2-7	CASGEGGTCEQYF	174	0.00235845		TRBV13-2	TRBJ1-6	CASSGYNSPLYF	107	0.0013991		TRBV13-2	TRBJ2-3	CASGDARGARSAETLYF	61	0.000871118		TRBV29	TRBJ2-1	CASGLGANYAEQF	55	0.000887082		TRBV1	TRBJ2-4	CSAEGLGGSQNTLHF	77	0.000950848
TRBV13-3	TRBJ1-3	CASSDGTGSGNTLYF	173	0.00234489		TRBV13-2	TRBJ1-4	CASSEGASNERLF	107	0.0013991		TRBV13-2	TRBJ2-1	CASSLGGGDNYAEQF	61	0.000871118		TRBV1	TRBJ2-7	CSAVGGKYGQYF	55	0.000887082		TRBV1	TRBJ2-2	CTSTLGGDTGQLYF	77	0.000950848
TRBV5	TRBJ2-3	CASSQDLTGASAETLHF	172	0.00233134		TRBV13-2	TRBJ1-4	CASGAGIGIGERLF	107	0.0013991		TRBV13-2	TRBJ2-1	CASGDGAGGAEQF	61	0.000871118		TRBV1	TRBJ2-4	CTRSAEGWGYLYF	55	0.000887082		TRBV1	TRBJ1-6	CTYSAGQYNSPLYF	77	0.000950848
TRBV29	TRBJ1-1	CASSLTGPSNTKVF	172	0.00233134		TRBV13-2	TRBJ1-2	CASSDAGEGSDYTF	107	0.0013991		TRBV13-2	TRBJ1-3	CASSEAGWNTLYF	61	0.000871118		TRBV1	TRBJ2-4	CSADRLGVSQDTLYF	55	0.000887082		TRBV1	TRBJ1-5	CSATGSNQAPLF	77	0.000950848
TRBV5	TRBJ2-7	CASSGGTGYEQYF	171	0.00231778		TRBV13-1	TRBJ2-1	CASSFRQGYAEQF	107	0.0013991		TRBV13-1	TRBJ2-7	CASSDNQGTYERYF	61	0.000871118		TRBV15	TRBJ2-7	CASSLELGGREQYF	55	0.000887082		TRBV1	TRBJ1-5	CSATGNNQAPLF	77	0.000950848
TRBV17	TRBJ2-7	CASSRAWTGGYEQYF	171	0.00231778		TRBV12-1	TRBJ2-7	CASSVRDWGSYEQYF	107	0.0013991		TRBV13-1	TRBJ2-2	CAGRQANTGQLYF	61	0.000871118		TRBV15	TRBJ2-7	CASSKDSYEQYF	55	0.000887082		TRBV1	TRBJ1-4	CSAGQLPNERLF	77	0.000950848
TRBV15	TRBJ2-3	CASSDWGGAETLYF	171	0.00231778		TRBV12-1	TRBJ1-3	CASSAGTGTGNTLYF	107	0.0013991		TRBV13-1	TRBJ2-1	CASSPDWGNAEQF	61	0.000871118		TRBV15	TRBJ1-1	CASRDSANTEVLF	55	0.000887082		TRBV1	TRBJ1-1	CTRSAEGATEVF	77	0.000950848
TRBV13-2	TRBJ2-7	CASSPDWGGYEQYF	171	0.00231778		TRBV20	TRBJ1-3	CGARDPPGENSGNTLYF	106	0.00138603		TRBV13-1	TRBJ1-2	CASGDQTNSDYTF	61	0.000871118		TRBV13-3	TRBJ2-7	CASSLDKSYEQYF	55	0.000887082		TRBV1	TRBJ1-1	CSGQGARATEAF	77	0.000950848
TRBV13-2	TRBJ2-5	CASSGDWGIQDTQYF	171	0.00231778		TRBV1	TRBJ2-2	CTSQGGNTGQLYF	106	0.00138603		TRBV5	TRBJ2-7	CASGQDQRGEQYF	60	0.000856838		TRBV13-3	TRBJ1-1	CASSRTGGAEVF	55	0.000887082		TRBV1	TRBJ1-1	CSAARNTEVF	77	0.000950848
TRBV13-2	TRBJ2-5	CASSDAGQEDTQYF	171	0.00231778		TRBV13-2	TRBJ2-3	CASSDRRTGSAETLYF	106	0.00138603		TRBV5	TRBJ2-5	CANMSQGRTLYCTCSATKDTQYF	60	0.000856838		TRBV13-2	TRBJ2-7	CASSSGFYEQYF	55	0.000887082		TRBV16	TRBJ1-6	CAGRQAYNSPLYF	77	0.000950848
TRBV13-2	TRBJ2-4	CASSPGPSQNTLYF	170	0.00230423		TRBV13-2	TRBJ2-2	CASSSGGTNTGQLYF	106	0.00138603		TRBV5	TRBJ2-3	CASSPGTSSAEALYF	60	0.000856838		TRBV13-2	TRBJ2-5	CASSLWDIQDTQYF	55	0.000887082		TRBV13-3	TRBJ2-7	CASSPGWGGYEQYF	77	0.000950848
TRBV13-2	TRBJ2-3	CASSDVGGSAETLYF	169	0.00229067		TRBV12-1	TRBJ2-1	CASSLDNYAERF	106	0.00138603		TRBV5	TRBJ2-1	CASSQGLGGGAEQF	60	0.000856838		TRBV13-2	TRBJ2-4	CASGERQSSQNTLYF	55	0.000887082		TRBV13-3	TRBJ2-5	CASSDRDQDTRYF	77	0.000950848
TRBV26	TRBJ1-1	CASSLTGPSNTEVF	168	0.00227712		TRBV5	TRBJ2-5	CASSRDPGVQDTQYF	105	0.00137295		TRBV5	TRBJ1-1	CASSQDGGDTEVSF	60	0.000856838		TRBV13-2	TRBJ2-1	CASSPQGANYAEQF	55	0.000887082		TRBV13-3	TRBJ1-1	CASRQINTEAF	77	0.000950848
TRBV1	TRBJ1-2	CTRSARTGHSDYTF	168	0.00227712		TRBV1	TRBJ2-4	CTGSAGLGEQNTLYF	105	0.00137295		TRBV4	TRBJ2-5	CASSPPRLQDTQYF	60	0.000856838		TRBV13-1	TRBJ2-7	CASSDGGDEQYF	55	0.000887082		TRBV13-1	TRBJ2-7	CASSPGTGGYEQYF	77	0.000950848
TRBV19	TRBJ2-7	CAHGTSYEQYF	167	0.00226357		TRBV1	TRBJ1-3	CSAGTASGDTLYF	105	0.00137295		TRBV4	TRBJ1-3	CASSRQISGNTLYF	60	0.000856838		TRBV13-1	TRBJ1-2	CASSLGTTNSDYTF	55	0.000887082		TRBV5	TRBJ2-1	CASSQGPGGRGAEQF	76	0.0009385
TRBV15	TRBJ1-1	CASSLTGPSNTEVF	167	0.00226357		TRBV13-2	TRBJ2-5	CASSEGQGGDTQYF	105	0.00137295		TRBV31	TRBJ1-1	CAWSLDTEVF	60	0.000856838		TRBV12-1	TRBJ2-7	CASSLGGGSEQYF	55	0.000887082		TRBV5	TRBJ1-1	CAGSQTGGDTEVF	76	0.0009385
TRBV5	TRBJ1-4	CASSQERVSNERLF	166	0.00225001		TRBV13-2	TRBJ2-3	CTCSVGTGSSAETLYF	105	0.00137295		TRBV2	TRBJ2-7	CASSQEREQYF	60	0.000856838		TRBV12-1	TRBJ2-5	CAGSLWDIQDTQYF	55	0.000887082		TRBV4	TRBJ2-4	CASWVQNTLYF	76	0.0009385
TRBV1	TRBJ2-7	CSAGGGSSYEQYF	166	0.00225001		TRBV13-2	TRBJ2-3	CASSDEGLGGETLYF	105	0.00137295		TRBV1	TRBJ2-7	CGGGGAGEQYF	60	0.000856838		TRBV12-1	TRBJ2-3	CASSDGATSAETLYF	55	0.000887082		TRBV3	TRBJ1-4	CASSLSTVNERLF	76	0.0009385
TRBV13-2	TRBJ1-2	CASGDYRDSDYTF	166	0.00225001		TRBV13-2	TRBJ2-2	CASSDATGQLYF	105	0.00137295		TRBV1	TRBJ2-5	CTRSDWGGAQDTQYF	60	0.000856838		TRBV12-1	TRBJ1-2	CASSPGGDSDYTF	55	0.000887082		TRBV2	TRBJ1-1	CASSQRLANTEVF	76	0.0009385
TRBV13-1	TRBJ2-1	CASRDLYAEQF	166	0.00225001		TRBV12-2	TRBJ2-4	CASSRDWGSQNTLYF	105	0.00137295		TRBV1	TRBJ2-5	CSALGVGTQYF	60	0.000856838		TRBV5	TRBJ1-3	CAGSPRGISGNTLYF	54	0.000870954		TRBV26	TRBJ2-1	CAWSLTGGVYAEQF	76	0.0009385
TRBV1	TRBJ2-4	CSEDGGGQNTLCF	165	0.00223646		TRBV12-1	TRBJ2-5	CASSPTGGDEQYF	105	0.00137295		TRBV1	TRBJ2-5	CSALGVDAQYF	60	0.000856838		TRBV2	TRBJ1-6	CASSQPGHHYNSPLYF	54	0.000870954		TRBV26	TRBJ2-1	CASSLDRIYAEQLF	76	0.0009385
TRBV17	TRBJ1-3	CASSQYSSGNTLYF	165	0.00223646		TRBV12-1	TRBJ1-4	CASSLRDISNERLSF	105	0.00137295		TRBV1	TRBJ2-4	CSDWGGQNTSYF	60	0.000856838		TRBV29	TRBJ2-5	CASAPRDWGGGDTQYF	54	0.000870954		TRBV26	TRBJ1-2	CASSQGQTDSDYTF	76	0.0009385
TRBV15	TRBJ2-7	CASSGGTGYEQYF	164	0.0022229		TRBV12-1	TRBJ1-2	CASSLEGRANSDYTF	105	0.00137295		TRBV1	TRBJ2-4	CSAGPTKTSQNTLYF	60	0.000856838		TRBV29	TRBJ2-2	CASRPGQNTGQLHF	54	0.000870954		TRBV1	TRBJ2-5	CSTEGQDTQYF	76	0.0009385
TRBV13-3	TRBJ1-3	CASTPGTAGNTLYF	164	0.0022229		TRBV5	TRBJ2-2	CVSSQDRLSTGQLYF	104	0.00135988		TRBV1	TRBJ2-4	CSAGGVSQDTLYF	60	0.000856838		TRBV26	TRBJ1-1	CASSGTGGAEVF	54	0.000870954		TRBV1	TRBJ2-5	CSLRGWDTQHF	76	0.0009385
TRBV13-1	TRBJ1-2	CASRDREDSDYTF	164	0.0022229		TRBV5	TRBJ1-2	CASSRGQGAGDYTF	104	0.00135988		TRBV1	TRBJ2-4	CSAEGEKSRNTLYF	60	0.000856838		TRBV1	TRBJ2-7	CTRSAVGGKYEQYF	54	0.000870954		TRBV1	TRBJ2-4	CSAGGSQNTLYF	76	0.0009385
TRBV15	TRBJ2-2	CASSPDWG_NTGQLYF	163	0.00220935		TRBV1	TRBJ2-4	CTAGLGEQNTLYF	104	0.00135988		TRBV1	TRBJ2-4	CSADLGRQNTLCF	60	0.000856838		TRBV1	TRBJ2-7	CSAEGWGGYERYF	54	0.000870954		TRBV1	TRBJ2-4	CSADNGGQNTLYF	76	0.0009385
TRBV15	TRBJ2-7	CASSSRTGSSYEQYF	161	0.00218224		TRBV1	TRBJ2-3	CSVGTGSSVETLYF	104	0.00135988		TRBV1	TRBJ2-2	CSAVQDSNTGQPYF	60	0.000856838		TRBV1	TRBJ2-4	CSGSQDTLYF	54	0.000870954		TRBV1	TRBJ1-5	CSAGTRVNQAPLF	76	0.0009385
TRBV13-2	TRBJ1-5	CASGDTVTLNNQAPLF	161	0.00218224		TRBV1	TRBJ2-3	CSVGTGSSAETLCF	104	0.00135988		TRBV1	TRBJ2-2	CSADWGDTEQLYF	60	0.000856838		TRBV1	TRBJ2-1	CSDWGYYAEQLF	54	0.000870954		TRBV1	TRBJ1-2	CRGPDHTF	76	0.0009385
TRBV13-2	TRBJ2-5	CASWGGAQDTQYF	160	0.00216869		TRBV1	TRBJ1-3	CSAGAASGNTLYF	104	0.00135988		TRBV1	TRBJ2-1	CTRSAEYAEQF	60	0.000856838		TRBV1	TRBJ1-4	CT_SADANNERLF	54	0.000870954		TRBV13-3	TRBJ2-3	CASSDARRPSAETLYF	76	0.0009385
TRBV1	TRBJ1-2	CGADPGQGNSDYTF	159	0.00215513		TRBV16	TRBJ1-1	CASSPSANTGVF	104	0.00135988		TRBV1	TRBJ1-4	CSAGRDNERLF	60	0.000856838		TRBV1	TRBJ1-2	CGLRDRGDSDYTF	54	0.000870954		TRBV13-3	TRBJ2-1	CAGSGGGNYAEQF	76	0.0009385
TRBV14	TRBJ2-7	CASSFGQGAYEQYF	159	0.00215513		TRBV13-3	TRBJ2-7	CASSEASQGYEQYF	104	0.00135988		TRBV1	TRBJ1-3	CGADVGGSGNTLYF	60	0.000856838		TRBV1	TRBJ1-1	CTRSVDIANTEVF	54	0.000870954		TRBV13-2	TRBJ2-1	CVSGGGQGNYAEQF	76	0.0009385
TRBV13-2	TRBJ1-2	CASSGGTVNSDYTF	159	0.00215513		TRBV13-3	TRBJ2-5	CASSQDPGVQDTQYF	104	0.00135988		TRBV1	TRBJ1-2	CSADRNPDYTF	60	0.000856838		TRBV16	TRBJ1-4	CASSLEGTNEGLF	54	0.000870954		TRBV13-2	TRBJ2-1	CTCSADEGNYAEQF	76	0.0009385
TRBV13-1	TRBJ2-2	CASSDGGQLYF	159	0.00215513		TRBV26	TRBJ2-1	CASSHAGRAEQF	103	0.0013468		TRBV1	TRBJ1-1	CTYSAGDTEVF	60	0.000856838		TRBV13-3	TRBJ2-3	CASSATSAETL_F	54	0.000870954		TRBV13-1	TRBJ1-2	CASSDADRNSDYAF	76	0.0009385
TRBV20	TRBJ2-1	CGARGTENYAEQF	158	0.00214158		TRBV1	TRBJ2-4	CSAGLGSQNTLYF	103	0.0013468		TRBV1	TRBJ1-1	CSAGDNAEVF	60	0.000856838		TRBV13-2	TRBJ2-7	CASSSRDWGVYEQYF	54	0.000870954		TRBV5	TRBJ2-7	CASSPTGGSYGQYF	75	0.000926151
TRBV20	TRBJ1-1	CGAPGNTEVF	158	0.00214158		TRBV19	TRBJ1-4	CASSIGVSNERLF	103	0.0013468		TRBV13-2	TRBJ2-7	CTCSGGQGAYEQYF	60	0.000856838		TRBV13-2	TRBJ2-5	CASGDAGLGGRQNTLYF	54	0.000870954		TRBV5	TRBJ2-7	CASSPTGGSYERYF	75	0.000926151
TRBV15	TRBJ2-5	CASRGQGEQYF	158	0.00214158		TRBV13-2	TRBJ2-7	CASSDAHRSSYEQYF	103	0.0013468		TRBV13-2	TRBJ2-7	CASGEKQGNEQYF	60	0.000856838		TRBV13-1	TRBJ2-7	CASSSQGEQYF	54	0.000870954		TRBV5	TRBJ2-7	CASSLGYEQYF	75	0.000926151
TRBV1	TRBJ1-1	CSDRGGTEVF	157	0.00212802		TRBV12-1	TRBJ2-3	CASSLGTSAETLYF	103	0.0013468		TRBV13-2	TRBJ2-4	CASSAGSQNTLYF	60	0.000856838		TRBV13-1	TRBJ2-3	CASSSPGTGGDAETLYF	54	0.000870954		TRBV5	TRBJ2-5	CASGQDGGVQDTQYF	75	0.000926151
TRBV13-3	TRBJ1-3	CASSDSGSGNTLYF	157	0.00212802		TRBV5	TRBJ1-6	CASSQDSGSYNSPLYF	102	0.00133372		TRBV13-2	TRBJ2-3	CASSQDWASAETLYF	60	0.000856838		TRBV13-1	TRBJ1-5	CASGEGYNNQAPLF	54	0.000870954		TRBV5	TRBJ1-1	CASSQTGGDTEAF	75	0.000926151
TRBV13-2	TRBJ2-7	CASSDDWGTYEQYF	154	0.00208736		TRBV5	TRBJ1-1	CASSQEGGAEVLF	102	0.00133372		TRBV13-2	TRBJ2-3	CASGDQLGGAETLYF	60	0.000856838		TRBV13-1	TRBJ1-1	CASSPGTDANTEVF	54	0.000870954		TRBV5	TRBJ1-1	CASSL_TNSNTEVF	75	0.000926151
TRBV5	TRBJ2-7	CASSQGRQYEQYF	152	0.00206025		TRBV24	TRBJ2-1	CASSPGLGGYAEQF	102	0.00133372		TRBV13-2	TRBJ1-6	CTCSADRDSYNSPLYF	60	0.000856838		TRBV12-1	TRBJ2-7	CASSPDKTYVQYF	54	0.000870954		TRBV31	TRBJ2-1	CAWSLTGGDNYAEQF	75	0.000926151
TRBV5	TRBJ2-4	CASNHLGGFQNTLYF	152	0.00206025		TRBV1	TRBJ1-1	CSAGRGNTEVF	102	0.00133372		TRBV13-2	TRBJ1-2	CAWGRDRVNSDYTF	60	0.000856838		TRBV12-1	TRBJ2-7	CASSLGF	54	0.000870954		TRBV30	TRBJ2-5	CSSSHNNQDTQYF	75	0.000926151
TRBV20	TRBJ2-7	CGAGHGSSYEQYF	152	0.00206025		TRBV13-2	TRBJ2-7	CASSPRLGGLEQYF	102	0.00133372		TRBV13-2	TRBJ1-1	CAAGTGNTEVF	60	0.000856838		TRBV12-1	TRBJ2-2	CASSLLGYTGQPYF	54	0.000870954		TRBV26	TRBJ2-7	CASSPTGGSYEQYF	75	0.000926151
TRBV13-2	TRBJ1-2	CASSDASANSDYTF	152	0.00206025		TRBV13-2	TRBJ2-7	CASSGPTGGHSYEQYF	102	0.00133372		TRBV13-1	TRBJ2-3	CASSPSGTGVAETLYF	60	0.000856838		TRBV12-1	TRBJ2-2	CASGARENTGQLYF	54	0.000870954		TRBV26	TRBJ1-3	CAGSLQGAGNTLYF	75	0.000926151
TRBV15	TRBJ1-3	CASSPQSSGNTLYF	150	0.00203314		TRBV1	TRBJ2-4	CSAGLGEQYTLYF	101	0.00132065		TRBV13-1	TRBJ2-3	CASSPGTSSAETLYF	60	0.000856838		TRBV12-1	TRBJ1-3	CASSLRGAGNTLYF	54	0.000870954		TRBV1	TRBJ2-7	CSVGGQGYEQYF	75	0.000926151
TRBV14	TRBJ2-3	CASSPRGSGAETLYF	149	0.00201959		TRBV1	TRBJ1-3	CSAGTASGSTLYF	101	0.00132065		TRBV13-1	TRBJ1-1	CASSEGRRNTEVF	60	0.000856838		TRBV12-1	TRBJ1-2	CASSPGGNPDYTF	54	0.000870954		TRBV1	TRBJ2-7	CSFPGTGSYEQYF	75	0.000926151
TRBV13-3	TRBJ2-2	CASTTGNGQLYF	149	0.00201959		TRBV1	TRBJ1-1	CTRSADQDAEVF	101	0.00132065		TRBV13-1	TRBJ1-1	CASSDAQKDTGVF	60	0.000856838		TRBV12-1	TRBJ1-1	CASSPGGMDTEVF	54	0.000870954		TRBV1	TRBJ2-7	CSAPGGCEQYF	75	0.000926151
TRBV13-3	TRBJ1-3	CASSAGPSGNTLYF	149	0.00201959		TRBV1	TRBJ1-1	CSAERGNAEVF	101	0.00132065		TRBV5	TRBJ2-7	CASSQDPPGGRGQYF	59	0.000842557		TRBV3	TRBJ2-7	CASSLDWAGPYEQYF	53	0.000854825		TRBV1	TRBJ2-4	CSVDNSQNTLYF	75	0.000926151
TRBV1	TRBJ1-6	CSAPGHFNSNNSPLYF	148	0.00200603		TRBV13-2	TRBJ2-3	CASSLAHAETLYF	101	0.00132065		TRBV5	TRBJ2-3	CAGQTSAETLYF	59	0.000842557		TRBV31	TRBJ1-4	CAWSLGGSNERLF	53	0.000854825		TRBV1	TRBJ2-4	CSGDNSQHTLYF	75	0.000926151
TRBV1	TRBJ1-5	CSAGPNNQAPPF	148	0.00200603		TRBV5	TRBJ2-2	CASSDVQGANTGQLYF	100	0.00130757		TRBV1	TRBJ2-7	CSGGGAGEQSF	59	0.000842557		TRBV31	TRBJ1-2	CAWKGQGGSDYTF	53	0.000854825		TRBV1	TRBJ2-2	CTSTPGGGTGQLYF	75	0.000926151
TRBV13-2	TRBJ2-4	CASSDWDSQNTLYF	148	0.00200603		TRBV1	TRBJ2-5	CSARDRGRDEQYF	100	0.00130757		TRBV1	TRBJ2-7	CSADRGGGYERYF	59	0.000842557		TRBV29	TRBJ2-5	CTSNRGDTQYF	53	0.000854825		TRBV1	TRBJ2-1	CTYSAGHNNYAEQF	75	0.000926151
TRBV13-2	TRBJ1-3	CASGDGQGAGNTLYF	148	0.00200603		TRBV1	TRBJ1-3	CGAGTASGNTLYF	100	0.00130757		TRBV1	TRBJ2-5	CTYSAGNQDTQYF	59	0.000842557		TRBV1	TRBJ2-7	CSASGNGQYF	53	0.000854825		TRBV1	TRBJ2-1	CSASRSNYAEQF	75	0.000926151
TRBV5	TRBJ2-3	CASSQDLTGTSAETLYF	147	0.00199248		TRBV1	TRBJ1-2	CSAAGTKNSDYTF	100	0.00130757		TRBV1	TRBJ2-5	CSATKDIQYF	59	0.000842557		TRBV1	TRBJ2-5	CSAVNQDTQCF	53	0.000854825		TRBV1	TRBJ2-1	CSAQDSNYAEQF	75	0.000926151
TRBV16	TRBJ2-5	CASKQRGCAQYF	147	0.00199248		TRBV13-3	TRBJ2-7	CASSVASQGYEQYF	100	0.00130757		TRBV1	TRBJ2-4	CTYSADLGRQNTLYF	59	0.000842557		TRBV1	TRBJ2-3	CSTDRAGGAETLYF	53	0.000854825		TRBV13-3	TRBJ2-3	CTSSDARGPSAETLYF	75	0.000926151
TRBV13-2	TRBJ2-5	CASSEPPGGQDTQYF	147	0.00199248		TRBV13-3	TRBJ2-7	CASSDASQGYDQYF	100	0.00130757		TRBV1	TRBJ2-4	CTRSGQSQNTLYF	59	0.000842557		TRBV1	TRBJ1-1	CSANGRNTEVF	53	0.000854825		TRBV13-3	TRBJ2-3	CASSQDGGAVAETLYF	75	0.000926151
TRBV13-2	TRBJ1-3	CASGDARAGDGNTLYF	147	0.00199248		TRBV13-2	TRBJ2-1	CASSDAAGGNYAEQF	100	0.00130757		TRBV1	TRBJ2-4	CTRSADGDWGSQNTLYF	59	0.000842557		TRBV1	TRBJ1-1	CSADRGGIAEVF	53	0.000854825		TRBV13-2	TRBJ1-2	CASGDRANYTF	75	0.000926151
TRBV23	TRBJ1-4	CSSSQSRGTNERLF	146	0.00197893		TRBV5	TRBJ2-5	CASSQDPGVQDTRYF	99	0.0012945		TRBV1	TRBJ2-4	CSADQGRQHTLYF	59	0.000842557		TRBV15	TRBJ2-1	CASRSTGGYNYAGQF	53	0.000854825		TRBV13-1	TRBJ1-2	CASSDGGGANSDYTF	75	0.000926151
TRBV13-2	TRBJ2-4	CASSPGLGGRQNTLYF	146	0.00197893		TRBV24	TRBJ1-1	CASSLPTQEVF	99	0.0012945		TRBV1	TRBJ2-4	CSADLSQSTLYF	59	0.000842557		TRBV15	TRBJ2-1	CASRSTGGHNYAEQF	53	0.000854825		TRBV5	TRBJ2-5	CSSSRNNQDTQYF	74	0.000913802
TRBV13-2	TRBJ2-1	CASSDRDNYAEQF	146	0.00197893		TRBV1	TRBJ2-3	CSATESAETLYF	99	0.0012945		TRBV1	TRBJ2-3	CTRSAGTGETLYF	59	0.000842557		TRBV15	TRBJ1-1	CASSLGSGGGTEVF	53	0.000854825		TRBV5	TRBJ2-1	CASSQSRNYAEQF	74	0.000913802
TRBV29	TRBJ1-1	CASSLTGPANTEVF	145	0.00196537		TRBV13-2	TRBJ2-4	CASSDWGSQNTLYF	99	0.0012945		TRBV1	TRBJ2-2	CSAEGQGAGRLYF	59	0.000842557		TRBV13-3	TRBJ1-4	CASSSSNEK_SF	53	0.000854825		TRBV5	TRBJ2-1	CASSQNRNYAGQF	74	0.000913802
TRBV15	TRBJ2-7	CASRGQGE_YF	145	0.00196537		TRBV13-2	TRBJ2-1	CASSDELANYAEQF	99	0.0012945		TRBV1	TRBJ2-1	CSARTGGVDYAEQF	59	0.000842557		TRBV13-3	TRBJ1-1	CASSPPANTEVF	53	0.000854825		TRBV5	TRBJ1-1	CAGSPGGDDTEVF	74	0.000913802
TRBV13-2	TRBJ1-6	CTCSAPGHFNSYNSPLYF	145	0.00196537		TRBV13-2	TRBJ1-1	CASSDVRATEVF	99	0.0012945		TRBV1	TRBJ1-4	CSAGQDNEGLF	59	0.000842557		TRBV13-3	TRBJ1-1	CASSDYGTNTEVF	53	0.000854825		TRBV4	TRBJ2-7	CASSQSSYEQYF	74	0.000913802
TRBV12-1	TRBJ1-4	CASSLGQGSEGLF	145	0.00196537		TRBV13-1	TRBJ2-1	CASGDALGGHAEQF	99	0.0012945		TRBV1	TRBJ1-4	CNADQGGNERLF	59	0.000842557		TRBV13-3	TRBJ1-1	CASSDAQNTEVLF	53	0.000854825		TRBV31	TRBJ1-5	CASRDTNSQAPLF	74	0.000913802
TRBV13-2	TRBJ2-3	CASSDGREGAETLYF	144	0.00195182		TRBV12-1	TRBJ2-2	CASSLGQGGTGQLYF	99	0.0012945		TRBV13-2	TRBJ2-7	CASGMGGGREQYF	59	0.000842557		TRBV13-2	TRBJ2-4	CASGDAGLGVSQNTLYF	53	0.000854825		TRBV30	TRBJ2-5	CSSSRNNQDTRYF	74	0.000913802
TRBV5	TRBJ2-4	CASSQAGGGGGSSQNTLCF	143	0.00193826		TRBV3	TRBJ1-4	CASSPRQSVERLF	98	0.00128142		TRBV13-2	TRBJ2-3	CAGGDAGGARSAETLYF	59	0.000842557		TRBV13-2	TRBJ2-3	CAWSLGQGAGAETLYF	53	0.000854825		TRBV2	TRBJ2-5	CASSQAWGVNQDTQYF	74	0.000913802
TRBV1	TRBJ2-7	CTYSARLGWEQYF	143	0.00193826		TRBV24	TRBJ1-6	CASSLGPNSPLYF	98	0.00128142		TRBV13-1	TRBJ2-7	CASSQDQRGEQYF	59	0.000842557		TRBV13-2	TRBJ1-1	CASSLGGMDTEVF	53	0.000854825		TRBV26	TRBJ2-7	CASSLGTGGYEQYF	74	0.000913802
TRBV1	TRBJ2-2	CSPGTGNTGQLYF	143	0.00193826		TRBV1	TRBJ2-4	CSAGLWEQNTLYF	98	0.00128142		TRBV13-1	TRBJ2-7	CASSGLGGEQYF	59	0.000842557		TRBV13-1	TRBJ1-3	CASSWDSSGNTLYF	53	0.000854825		TRBV26	TRBJ2-4	CASSPRGRQDTLYF	74	0.000913802
TRBV13-2	TRBJ2-4	CASSPDGQNTLYF	143	0.00193826		TRBV13-2	TRBJ2-3	CASSGQSGGWAETLYF	98	0.00128142		TRBV5	TRBJ2-7	CASSQEDWGNYERYF	58	0.000828277		TRBV13-1	TRBJ1-2	CASSDTNSDYTF	53	0.000854825		TRBV26	TRBJ2-1	CASSLDRIHAEQF	74	0.000913802
TRBV5	TRBJ2-3	CASSQDLTGASAGTLYF	142	0.00192471		TRBV13-2	TRBJ1-6	CASSDGGAGNSPLYF	98	0.00128142		TRBV5	TRBJ2-7	CASSQDGTGAYEQYF	58	0.000828277		TRBV12-1	TRBJ2-5	CASSQDWGPQDTQYF	53	0.000854825		TRBV1	TRBJ2-7	CTRSADRTGGSEQYF	74	0.000913802
TRBV13-2	TRBJ2-7	CASSDAGGSSYEQYF	142	0.00192471		TRBV13-2	TRBJ1-1	CASSDQNTEVF	98	0.00128142		TRBV5	TRBJ2-7	CAGSQDQRGEQYF	58	0.000828277		TRBV5	TRBJ2-5	CASSQGWGPQDTQYF	52	0.000838696		TRBV1	TRBJ2-7	CSADRTGGREQYF	74	0.000913802
TRBV13-2	TRBJ2-1	CASSDRRYAEQF	142	0.00192471		TRBV13-2	TRBJ1-1	CASSDGGTEVF	98	0.00128142		TRBV5	TRBJ2-5	CAGSQAVNQDTQYF	58	0.000828277		TRBV5	TRBJ2-5	CASSLGTGQDTQYF	52	0.000838696		TRBV1	TRBJ2-7	CGATGGAYEQYF	74	0.000913802
TRBV13-2	TRBJ2-7	CASRLSSYEQYF	141	0.00191115		TRBV13-1	TRBJ2-5	CASGGQGKQDTQYF	98	0.00128142		TRBV5	TRBJ2-3	CASSRDWASAETLYF	58	0.000828277		TRBV5	TRBJ1-3	CASSPRRISGNTLYF	52	0.000838696		TRBV1	TRBJ2-5	CTYSASRDPGGDTQYF	74	0.000913802
TRBV13-2	TRBJ2-3	CASGDPASAETLYF	141	0.00191115		TRBV5	TRBJ2-5	CASGQDPGVQDTQYF	97	0.00126835		TRBV5	TRBJ2-3	CASSQDRASAETLYF	58	0.000828277		TRBV5	TRBJ1-1	CASSGTGYTEVF	52	0.000838696		TRBV1	TRBJ2-5	CGAVDRGLDTQYF	74	0.000913802
TRBV13-2	TRBJ2-5	CASSEDWGGAWDTQYF	140	0.0018976		TRBV29	TRBJ2-5	CASSLSWSRDTQYF	97	0.00126835		TRBV5	TRBJ2-1	CASSPGWGNAEQF	58	0.000828277		TRBV31	TRBJ2-3	CAWSLGQGAGAETPYF	52	0.000838696		TRBV1	TRBJ2-1	CSTGHNNYAEQF	74	0.000913802
TRBV13-2	TRBJ1-3	CASGDDRDGNTLYF	140	0.0018976		TRBV13-2	TRBJ2-4	CASSSTGGKNTLYF	97	0.00126835		TRBV5	TRBJ2-1	CAGSQATNYAEQF	58	0.000828277		TRBV31	TRBJ2-3	CAWGLGQGAGAETLYF	52	0.000838696		TRBV1	TRBJ2-1	CSGTGGDNYAEQLF	74	0.000913802
TRBV1	TRBJ1-4	CSARDRASNERLF	139	0.00188405		TRBV12-2	TRBJ2-7	CASSLETGGIYEQYF	97	0.00126835		TRBV5	TRBJ1-1	CASSQDRGDTEVF	58	0.000828277		TRBV31	TRBJ2-1	CAWTRGVNYAEQF	52	0.000838696		TRBV1	TRBJ2-1	CSAWDSNYAEQF	74	0.000913802
TRBV13-2	TRBJ1-4	CASSDRRGRPNERLF	139	0.00188405		TRBV12-2	TRBJ2-1	CASSPTGGNYAEQF	97	0.00126835		TRBV4	TRBJ2-4	CASSLDWGPSQNTLYF	58	0.000828277		TRBV29	TRBJ2-7	CASSLGF	52	0.000838696		TRBV1	TRBJ1-5	CSADRGAPPLF	74	0.000913802
TRBV13-2	TRBJ2-4	CASSGTGENTLYF	138	0.00187049		TRBV12-1	TRBJ2-5	CASSPGGNQDTQYF	97	0.00126835		TRBV31	TRBJ2-7	CAWSLGLGGREQYF	58	0.000828277		TRBV29	TRBJ2-5	CASSRTGVQDTQYF	52	0.000838696		TRBV1	TRBJ1-5	CNAGTGVNQAPLF	74	0.000913802
TRBV13-2	TRBJ2-4	CASGDAPSQNTSYF	138	0.00187049		TRBV5	TRBJ2-5	CASSRDNNQDTQYF	96	0.00125527		TRBV31	TRBJ2-2	CAWSLPRGSNAGQLYF	58	0.000828277		TRBV29	TRBJ1-6	CASSLGTGSHSPLYF	52	0.000838696		TRBV1	TRBJ1-4	CSAGRLSNERLF	74	0.000913802
TRBV26	TRBJ2-2	CASSLGRNTRQLYF	136	0.00184338		TRBV5	TRBJ2-5	CASSLAGLGDEQYF	96	0.00125527		TRBV31	TRBJ2-2	CAWGLPRGSNTGQLYF	58	0.000828277		TRBV26	TRBJ1-1	CASSRTGYTEVF	52	0.000838696		TRBV1	TRBJ1-4	CSAGQLSNGRLF	74	0.000913802
TRBV13-2	TRBJ2-5	CAGGDQDRDNQDTQYF	136	0.00184338		TRBV1	TRBJ2-7	CSARDRGRDEQHF	96	0.00125527		TRBV31	TRBJ2-1	CARSRRLGGYAEQF	58	0.000828277		TRBV1	TRBJ2-3	CSADRAGDAETLYF	52	0.000838696		TRBV1	TRBJ1-1	CSADRDTEVF	74	0.000913802
TRBV13-2	TRBJ2-4	CASGEGGGGRNTLYF	136	0.00184338		TRBV1	TRBJ2-7	CGPGQIIYEQYF	96	0.00125527		TRBV31	TRBJ1-2	CAWSRDRVNSDYTF	58	0.000828277		TRBV1	TRBJ1-4	CSEDANNERLF	52	0.000838696		TRBV1	TRBJ1-1	CQGTEDTEVF	74	0.000913802
TRBV12-2	TRBJ2-4	CASSRTGGGQNTLYF	136	0.00184338		TRBV13-3	TRBJ2-7	CASSDISQGYEQYF	96	0.00125527		TRBV30	TRBJ2-7	CSS_DRDWGDEQYF	58	0.000828277		TRBV1	TRBJ1-4	CSADANNERLYF	52	0.000838696		TRBV13-3	TRBJ2-7	CANSDWDNSYEQYF	74	0.000913802
TRBV13-3	TRBJ2-4	CAGSDAGLGSQNTLYF	135	0.00182983		TRBV13-2	TRBJ1-1	CASSDWDREVF	96	0.00125527		TRBV1	TRBJ2-7	CSADGTIERYF	58	0.000828277		TRBV1	TRBJ1-3	CSAGEGQGAGNTLYF	52	0.000838696		TRBV13-3	TRBJ2-3	CVSSDARGPSAETLYF	74	0.000913802
TRBV13-2	TRBJ2-1	CASSDVGNYAEQF	135	0.00182983		TRBV1	TRBJ2-1	CSATRWGVCAEQF	95	0.00124219		TRBV1	TRBJ2-5	CSADLGRQNTLYF	58	0.000828277		TRBV1	TRBJ1-1	CSADHGGTEVLF	52	0.000838696		TRBV13-3	TRBJ2-3	CASSQDRVAETLYF	74	0.000913802
TRBV13-2	TRBJ1-3	CASGEHSGNTLYF	135	0.00182983		TRBV13-3	TRBJ2-7	CASSDPDREEYEQYF	95	0.00124219		TRBV1	TRBJ2-4	CSAGYQSTLYF	58	0.000828277		TRBV16	TRBJ1-4	CASSFEGTNERLF	52	0.000838696		TRBV13-2	TRBJ2-1	CTSGGGQGNYAEQF	74	0.000913802
TRBV29	TRBJ1-1	CASSLTGSSNTEVF	133	0.00180272		TRBV13-3	TRBJ2-7	CASSDASQGYELYF	95	0.00124219		TRBV1	TRBJ2-4	CSADQGRQTTLYF	58	0.000828277		TRBV15	TRBJ2-1	CASSQRTDYAEQF	52	0.000838696		TRBV13-2	TRBJ1-6	CAGGESYNSPLYF	74	0.000913802
TRBV13-2	TRBJ2-7	CASSDLGAYEQYF	133	0.00180272		TRBV13-3	TRBJ2-7	CASSDASQG_EQYF	95	0.00124219		TRBV1	TRBJ2-4	CGAEGEKSQNTLYF	58	0.000828277		TRBV15	TRBJ2-1	CASGSTGGYNYAEQF	52	0.000838696		TRBV13-1	TRBJ1-6	CASSRQDYNSPLYF	74	0.000913802
TRBV29	TRBJ1-6	CASSPGTNDSPLYF	132	0.00178917		TRBV13-2	TRBJ2-4	CASSDTRKNTLYF	95	0.00124219		TRBV1	TRBJ2-3	CSGRQAETPYF	58	0.000828277		TRBV13-3	TRBJ2-5	CASSRTGVQGTQYF	52	0.000838696		TRBV13-1	TRBJ1-2	CASSDAAENSDYAF	74	0.000913802
TRBV29	TRBJ1-1	CASSLTGPLNTEVF	132	0.00178917		TRBV13-1	TRBJ2-1	CASGDMTGGNYAEQF	95	0.00124219		TRBV1	TRBJ2-3	CSADPETLCF	58	0.000828277		TRBV13-2	TRBJ2-3	CASSLWGTSAETLYF	52	0.000838696		TRBV12-1	TRBJ1-6	CASSPGTNSYNSPLYF	74	0.000913802
TRBV1	TRBJ1-6	CSAPGHFNFYNSPLYF	132	0.00178917		TRBV5	TRBJ2-4	CANMSQGRTLYCTCSAGLGEQNTLYF	94	0.00122912		TRBV1	TRBJ2-2	CSAQGGTGQLYF	58	0.000828277		TRBV13-2	TRBJ1-4	CASSERTFSNERLF	52	0.000838696		TRBV5	TRBJ2-5	CASGEGTGQDTQYF	73	0.000901454
TRBV1	TRBJ2-3	CSA_LGGFAETLYF	131	0.00177561		TRBV26	TRBJ2-3	CSLEIQSSEAGDSALYLRASSLAHAETLYF	94	0.00122912		TRBV1	TRBJ2-1	CTRSARDWGF	58	0.000828277		TRBV13-1	TRBJ1-6	CDAGDSPLYF	52	0.000838696		TRBV5	TRBJ2-3	CASSQDGGAAAETLYF	73	0.000901454
TRBV13-3	TRBJ1-3	CASGNSGNTLYF	131	0.00177561		TRBV1	TRBJ2-4	CSAGLVEQNTLYF	94	0.00122912		TRBV1	TRBJ2-1	CTRSADLGRNYAEQF	58	0.000828277		TRBV13-1	TRBJ1-2	CASGDPGQGSDYTF	52	0.000838696		TRBV5	TRBJ2-3	CAGSQDRVAETLYF	73	0.000901454
TRBV13-2	TRBJ2-7	CASGGTAYGQYF	131	0.00177561		TRBV1	TRBJ2-4	CSAETESQNTSYF	94	0.00122912		TRBV1	TRBJ1-4	CSADRAGGDEK_SF	58	0.000828277		TRBV12-2	TRBJ2-5	CASSLDWGVEDTQYF	52	0.000838696		TRBV5	TRBJ1-4	CASGLRQGGGAERLF	73	0.000901454
TRBV13-2	TRBJ2-5	CASSDEGGQDTQYF	131	0.00177561		TRBV16	TRBJ1-1	CASSTDRRVNTEVF	94	0.00122912		TRBV1	TRBJ1-3	CTRSATNSGNTLYF	58	0.000828277		TRBV12-1	TRBJ2-7	CASGDGGASYEQYF	52	0.000838696		TRBV5	TRBJ1-1	CASGQDKTGVTEVF	73	0.000901454
TRBV3	TRBJ1-2	CASSSANSDYTF	130	0.00176206		TRBV15	TRBJ1-3	CASRGQGARNTLYF	94	0.00122912		TRBV1	TRBJ1-3	CSADVGGSGNTPYF	58	0.000828277		TRBV12-1	TRBJ2-5	CASSLWDIQDAQYF	52	0.000838696		TRBV31	TRBJ2-1	CAWSLTGGVYAKQF	73	0.000901454
TRBV1	TRBJ2-3	CSAETGTSAETL_F	130	0.00176206		TRBV13-3	TRBJ2-4	CASSAGLGEQNTLYF	94	0.00122912		TRBV1	TRBJ1-3	CGATNSGNTLYF	58	0.000828277		TRBV12-1	TRBJ2-3	CASSLETSAKTLYF	52	0.000838696		TRBV26	TRBJ2-4	CASSPGQGARGQNTLYF	73	0.000901454
TRBV13-2	TRBJ2-7	CATTGGSYEQYF	130	0.00176206		TRBV13-2	TRBJ1-6	CASSGQSSYNSPLYF	94	0.00122912		TRBV1	TRBJ1-1	CSASGTEGTEVF	58	0.000828277		TRBV12-1	TRBJ2-3	CASSDRGTGSSAETLYF	52	0.000838696		TRBV1	TRBJ2-7	CSAGRTGGSEQYF	73	0.000901454
TRBV13-2	TRBJ2-1	CAGGGTGDYAEQF	130	0.00176206		TRBV13-2	TRBJ1-2	CASSDEEGRSDYTF	94	0.00122912		TRBV13-2	TRBJ2-7	CGERQGNEQYF	58	0.000828277		TRBV12-1	TRBJ1-2	CASSPGANSDYTF	52	0.000838696		TRBV1	TRBJ2-3	CSVGQGNSAKTLYF	73	0.000901454
TRBV13-2	TRBJ1-2	CASSDARANSDYTF	130	0.00176206		TRBV13-2	TRBJ1-1	CASSDAHANTEVF	94	0.00122912		TRBV13-2	TRBJ2-7	CASGGAQYEQYF	58	0.000828277		TRBV2	TRBJ2-4	CASSQDWWGQNTLYF	51	0.000822567		TRBV1	TRBJ1-5	CTYSAGTGVNQAPLF	73	0.000901454
TRBV14	TRBJ2-7	CASSFQGGEQYF	129	0.0017485		TRBV12-2	TRBJ2-4	CASSLWGGATLYF	94	0.00122912		TRBV13-2	TRBJ2-2	CASGAGTTNTGQPYF	58	0.000828277		TRBV2	TRBJ1-1	CASSQDLQGGTEVF	51	0.000822567		TRBV1	TRBJ1-3	CSINSGNTLHF	73	0.000901454
TRBV13-2	TRBJ1-2	CASSDTNSDYTF	129	0.0017485		TRBV12-1	TRBJ2-1	CASSPTGGNYAEQF	94	0.00122912		TRBV13-2	TRBJ1-2	CASGETGGSDYTF	58	0.000828277		TRBV29	TRBJ2-1	CASSLGANYAEQSF	51	0.000822567		TRBV1	TRBJ1-3	CSINSGNTLCF	73	0.000901454
TRBV16	TRBJ2-3	CASSPGWGTSAETLYF	128	0.00173495		TRBV5	TRBJ2-5	CASSQERDRDTPYF	93	0.00121604		TRBV13-1	TRBJ1-1	CASSEGQRNAEVF	58	0.000828277		TRBV1	TRBJ2-7	CSGDRSYEQHF	51	0.000822567		TRBV1	TRBJ1-1	CQGTENTGVF	73	0.000901454
TRBV1	TRBJ1-1	CRAGTTNTEVF	127	0.00172139		TRBV5	TRBJ2-2	CASSRDWGGTNTGQPYF	93	0.00121604		TRBV5	TRBJ2-3	CASSHARGGAETLYF	57	0.000813996		TRBV1	TRBJ2-5	CSVVNQDTQYF	51	0.000822567		TRBV16	TRBJ2-3	CASSPHWGGRAETLYF	73	0.000901454
TRBV15	TRBJ2-7	CASSLVGGDEQYF	127	0.00172139		TRBV5	TRBJ1-4	CASSNRGRHERLF	93	0.00121604		TRBV5	TRBJ2-1	CASSQGLGGHAEQF	57	0.000813996		TRBV1	TRBJ2-4	CSADQGWGGWQNTLYF	51	0.000822567		TRBV15	TRBJ2-7	CASSLGLGGYEQYF	73	0.000901454
TRBV13-1	TRBJ2-7	CASSGGEGSYEQYF	127	0.00172139		TRBV30	TRBJ2-1	CSSPTGNYAEQF	93	0.00121604		TRBV5	TRBJ1-2	CASSQGGTANSDYTF	57	0.000813996		TRBV1	TRBJ1-4	CTFSADANNERLF	51	0.000822567		TRBV13-3	TRBJ2-7	CASSDWDNSCEQYF	73	0.000901454
TRBV5	TRBJ2-3	CVSSQDLTGASAETLYF	126	0.00170784		TRBV26	TRBJ1-2	CASGLTGTNSDYTF	93	0.00121604		TRBV5	TRBJ1-1	CASSQGQGASTEVF	57	0.000813996		TRBV15	TRBJ2-5	CASSAGPFNQDAQYF	51	0.000822567		TRBV13-3	TRBJ2-1	CASSSGHNNYAEQF	73	0.000901454
TRBV26	TRBJ2-2	CASSLDRNTGQLYF	126	0.00170784		TRBV24	TRBJ1-2	CASSLTANSDYTF	93	0.00121604		TRBV31	TRBJ2-7	CAWSRGLGGHLEQYF	57	0.000813996		TRBV15	TRBJ2-1	CASRSTGGYNYTEQF	51	0.000822567		TRBV13-3	TRBJ1-1	CASSQGQGDTEVF	73	0.000901454
TRBV1	TRBJ2-3	CSGTGSAVTLYF	126	0.00170784		TRBV1	TRBJ1-1	CSAGREVF	93	0.00121604		TRBV30	TRBJ2-5	CSPRRGLGEDTQYF	57	0.000813996		TRBV13-3	TRBJ1-1	CASSDYRTNAEVF	51	0.000822567		TRBV13-3	TRBJ1-1	CASRPGQTEVF	73	0.000901454
TRBV13-2	TRBJ2-3	CASSAGTGGSAETLYF	126	0.00170784		TRBV13-2	TRBJ2-5	CASGGGGGRDEQYF	93	0.00121604		TRBV1	TRBJ2-7	CSAGG_QYF	57	0.000813996		TRBV13-2	TRBJ2-5	CASSLSTLNQDTQYF	51	0.000822567		TRBV13-2	TRBJ2-5	CASGDAQGVNQDTQYF	73	0.000901454
TRBV5	TRBJ2-3	CASSQDLTGASAETLCF	125	0.00169429		TRBV12-2	TRBJ2-5	CASSPGGNQDTQYF	93	0.00121604		TRBV1	TRBJ2-7	CGAGLGGREQYF	57	0.000813996		TRBV13-1	TRBJ2-1	CASSAGNYAEQF	51	0.000822567		TRBV13-2	TRBJ2-1	CASSPGTGGRAEQF	73	0.000901454
TRBV12-1	TRBJ1-4	CASSLEGNKRLF	125	0.00169429		TRBV12-1	TRBJ1-4	CASPLRDISNERLF	93	0.00121604		TRBV1	TRBJ2-5	CSARNQDTQYF	57	0.000813996		TRBV13-1	TRBJ1-6	CDSSDAGDSPLYF	51	0.000822567		TRBV13-1	TRBJ2-7	CASSLGLGGYEQYF	73	0.000901454
TRBV5	TRBJ2-3	CASSHRDWSTSAETLYF	124	0.00168073		TRBV3	TRBJ2-5	CASSLNWGDTQYF	92	0.00120297		TRBV1	TRBJ2-5	CSALGVDTRYF	57	0.000813996		TRBV13-1	TRBJ1-6	CASSDAGDSPVYF	51	0.000822567		TRBV13-1	TRBJ1-2	CASSDAGGGSDYAF	73	0.000901454
TRBV29	TRBJ2-7	CASRPGQYEQYF	124	0.00168073		TRBV24	TRBJ1-1	CASSLKADANTEVF	92	0.00120297		TRBV1	TRBJ2-4	CSGQSQDTLYF	57	0.000813996		TRBV12-1	TRBJ2-7	CASSPDRSYEQYF	51	0.000822567		TRBV5	TRBJ2-5	CASSQGNQDTQYF	72	0.000889105
TRBV1	TRBJ2-1	CSAVRVAEQF	124	0.00168073		TRBV1	TRBJ2-1	CRPGRGVNYAEQF	92	0.00120297		TRBV1	TRBJ2-4	CSAEGGKSQNTLYF	57	0.000813996		TRBV12-1	TRBJ2-7	CASSPDNTYEQYF	51	0.000822567		TRBV5	TRBJ2-5	CASSQDGGVRDTQYF	72	0.000889105
TRBV13-2	TRBJ2-5	CASSGQDTQYF	124	0.00168073		TRBV13-2	TRBJ1-1	CASSLSGTNTEVF	92	0.00120297		TRBV1	TRBJ2-4	CSAEGERSQNTLYF	57	0.000813996		TRBV12-1	TRBJ2-7	CASSDAGGSEQYF	51	0.000822567		TRBV5	TRBJ2-4	CASSQDSTISQNTSYF	72	0.000889105
TRBV13-2	TRBJ2-4	CASGDDGGSQSTLYF	124	0.00168073		TRBV12-2	TRBJ2-1	CASSLSRGLAEQF	92	0.00120297		TRBV1	TRBJ2-3	CSGQDAETPYF	57	0.000813996		TRBV5	TRBJ1-4	CASSLSHFSNERLF	50	0.000806438		TRBV5	TRBJ2-3	CASSQDGGAVAETPYF	72	0.000889105
TRBV1	TRBJ2-7	CSAWGGYERYF	123	0.00166718		TRBV12-2	TRBJ1-1	CASSLGQGGVF	92	0.00120297		TRBV1	TRBJ1-6	CRADRDSYNSPLYF	57	0.000813996		TRBV4	TRBJ1-2	CASSWTGGSDYTF	50	0.000806438		TRBV5	TRBJ1-6	CASSQGRDRGSPLYF	72	0.000889105
TRBV1	TRBJ2-5	CTRSADLGGRLDTQYF	123	0.00166718		TRBV5	TRBJ2-2	CASSQELGGNTGQLYF	91	0.00118989		TRBV1	TRBJ1-4	CTRSADQGGNERLF	57	0.000813996		TRBV2	TRBJ2-3	CASSQERTSAETLYF	50	0.000806438		TRBV31	TRBJ2-1	CASSQNRNYAEQF	72	0.000889105
TRBV1	TRBJ2-4	CSGTGGGNTLYF	123	0.00166718		TRBV1	TRBJ2-3	CSARSSAETLYF	91	0.00118989		TRBV1	TRBJ1-4	CSGDRISSERLF	57	0.000813996		TRBV29	TRBJ2-5	CASSWTGGHQDTQYF	50	0.000806438		TRBV31	TRBJ1-5	CASRDTSNQAPLF	72	0.000889105
TRBV1	TRBJ1-1	CSAAVTNTEVF	123	0.00166718		TRBV1	TRBJ2-3	CGADPAETLYF	91	0.00118989		TRBV1	TRBJ1-1	CSGGRRDTEVF	57	0.000813996		TRBV29	TRBJ1-4	CSADANNERLF	50	0.000806438		TRBV26	TRBJ2-1	CASSQNRNYAEQF	72	0.000889105
TRBV13-2	TRBJ2-7	CASGGRDSSYEQYF	123	0.00166718		TRBV13-3	TRBJ2-7	CASSQTGGKAYEQYF	91	0.00118989		TRBV1	TRBJ1-1	CSAGGRANTEVF	57	0.000813996		TRBV26	TRBJ2-5	CASSRTGVQDTQYF	50	0.000806438		TRBV26	TRBJ1-5	CSAGTGVNQAPLF	72	0.000889105
TRBV13-2	TRBJ1-5	CAGGPDNYNNQAPLF	123	0.00166718		TRBV13-3	TRBJ2-5	CASSDRGPNQDTQYF	91	0.00118989		TRBV1	TRBJ1-1	CSAGGPTEVF	57	0.000813996		TRBV1	TRBJ2-7	CSGDGSYEQYF	50	0.000806438		TRBV26	TRBJ1-2	CASSLGTTNSDYTF	72	0.000889105
TRBV13-2	TRBJ1-4	CASGDINERLF	123	0.00166718		TRBV13-2	TRBJ2-7	CASSDGTGGYEQYF	91	0.00118989		TRBV1	TRBJ1-1	CSAGGEVF	57	0.000813996		TRBV1	TRBJ2-5	CGERDWGHQDTQYF	50	0.000806438		TRBV26	TRBJ1-2	CASSLGANSDYTF	72	0.000889105
TRBV13-2	TRBJ1-3	CASGPTGVGNTLYF	123	0.00166718		TRBV13-2	TRBJ2-1	CASSDFGGYNYAEQF	91	0.00118989		TRBV1	TRBJ1-1	CSAAGRDTEVF	57	0.000813996		TRBV1	TRBJ1-3	CSADGGQGAGNTLYF	50	0.000806438		TRBV26	TRBJ1-2	CASSLGAANSDYTF	72	0.000889105
TRBV1	TRBJ1-6	CSAPGYFNSYNSPLYF	122	0.00165362		TRBV13-1	TRBJ2-5	CASGNTGGNQDTQYF	91	0.00118989		TRBV1	TRBJ1-1	CNAAQGNTEVF	57	0.000813996		TRBV1	TRBJ1-1	CSAEGGEAF	50	0.000806438		TRBV1	TRBJ2-7	CSASGGYEQYF	72	0.000889105
TRBV13-2	TRBJ2-2	CASSPDSGTGQLYF	122	0.00165362		TRBV13-1	TRBJ2-2	CASRDWGNTGQLYF	91	0.00118989		TRBV13-2	TRBJ2-7	CASGKRQGNEQYF	57	0.000813996		TRBV1	TRBJ1-1	CSADGRNIEVF	50	0.000806438		TRBV1	TRBJ2-7	CSADRTGGSGQYF	72	0.000889105
TRBV13-2	TRBJ1-2	CASSDAGAGNSDYTF	122	0.00165362		TRBV12-1	TRBJ2-2	CASSLGQGDAGQLYF	91	0.00118989		TRBV13-2	TRBJ2-5	CASGDAWGQDTQYF	57	0.000813996		TRBV1	TRBJ1-1	CGEQGRDTEVF	50	0.000806438		TRBV1	TRBJ2-5	CSASQDPGGDTQYF	72	0.000889105
TRBV5	TRBJ2-3	CASSQDLTGANAETLYF	121	0.00164007		TRBV12-1	TRBJ1-3	CTSSAGTGTGNTLYF	91	0.00118989		TRBV13-2	TRBJ1-2	CAGGDAEGASDYTF	57	0.000813996		TRBV19	TRBJ1-5	CASSIAGGNQAPLF	50	0.000806438		TRBV1	TRBJ2-3	CSAPAGGGGAETLYF	72	0.000889105
TRBV15	TRBJ2-2	CASTGQLNTGQPYF	121	0.00164007		TRBV5	TRBJ1-1	CASSLGQTANTEVF	90	0.00117682		TRBV13-2	TRBJ1-1	CASGPGQGATEVLF	57	0.000813996		TRBV15	TRBJ2-1	CASSFRDWGYAERF	50	0.000806438		TRBV1	TRBJ1-5	CSADQETPLF	72	0.000889105
TRBV13-2	TRBJ2-1	CASSSGTNAEQF	121	0.00164007		TRBV26	TRBJ1-1	CASSLKADANTEVF	90	0.00117682		TRBV13-2	TRBJ1-1	CASGPGQGATEAF	57	0.000813996		TRBV13-3	TRBJ2-7	CASSDAQ_CVAPFTLQSSYEQYF	50	0.000806438		TRBV1	TRBJ1-4	CSALSNERLF	72	0.000889105
TRBV13-2	TRBJ1-5	CASSDGEARGNQAPLF	121	0.00164007		TRBV1	TRBJ2-1	CSGDRYYAEQF	90	0.00117682		TRBV13-1	TRBJ1-1	CTSSDAQKDTEVF	57	0.000813996		TRBV13-3	TRBJ2-5	CASSRTGVQDAQYF	50	0.000806438		TRBV1	TRBJ1-4	CGAGQLSNERLF	72	0.000889105
TRBV13-2	TRBJ1-5	CASGGRQGAGNQAPLF	121	0.00164007		TRBV1	TRBJ1-1	CSAGLGEQNTEVF	90	0.00117682		TRBV13-1	TRBJ1-1	CASSDARKDTEVF	57	0.000813996		TRBV13-3	TRBJ1-1	CASSDYRANTEVF	50	0.000806438		TRBV15	TRBJ1-1	CASSYWANTEVF	72	0.000889105
TRBV13-2	TRBJ1-2	CASSDGSDYTF	121	0.00164007		TRBV13-3	TRBJ2-7	CASGDAGYEQYF	90	0.00117682		TRBV13-1	TRBJ1-1	CASGERDREVF	57	0.000813996		TRBV13-2	TRBJ2-1	CASGTGAGQF	50	0.000806438		TRBV15	TRBJ1-1	CASSLDWANTEVF	72	0.000889105
TRBV13-2	TRBJ1-2	CASGEGRPDSDYTF	121	0.00164007		TRBV13-2	TRBJ2-7	CASSDGGYEQYF	90	0.00117682		TRBV5	TRBJ2-4	CASSAGGQNTLYF	56	0.000799715		TRBV13-1	TRBJ2-7	CASGDSTGGHSYEQYF	50	0.000806438		TRBV13-3	TRBJ2-7	CASSPQTGGVSYEQYF	72	0.000889105
TRBV1	TRBJ1-6	CSAPGHFNSYNSPHYF	120	0.00162651		TRBV13-1	TRBJ2-5	CASGGQGQDTQYF	90	0.00117682		TRBV5	TRBJ2-3	CASSPRGTETPYF	56	0.000799715		TRBV13-1	TRBJ2-7	CASGDEGDEQYF	50	0.000806438		TRBV13-3	TRBJ1-5	CSAGTGVNQAPLF	72	0.000889105
TRBV13-2	TRBJ2-1	CASRGRIYAEQF	120	0.00162651		TRBV12-1	TRBJ1-1	CASSLGQGGVF	90	0.00117682		TRBV5	TRBJ2-3	CANMSQGRTLYCTCSADPETLYF	56	0.000799715		TRBV13-1	TRBJ2-3	CASSDGDWAETPYF	50	0.000806438		TRBV13-2	TRBJ1-2	CASSFRTNSDYTF	72	0.000889105
TRBV13-2	TRBJ1-2	CASGDSGTGDSDYTF	120	0.00162651		TRBV1	TRBJ2-3	CTYSVGTGSSAETLYF	89	0.00116374		TRBV5	TRBJ2-1	CASSRDQRGEQYF	56	0.000799715		TRBV13-1	TRBJ1-6	CASSDAGDSRLYF	50	0.000806438		TRBV13-2	TRBJ1-1	CASSPTGSNTEVF	72	0.000889105
TRBV13-1	TRBJ1-4	CAGRDSSNERLF	120	0.00162651		TRBV1	TRBJ1-1	CSADGGQSTEVSF	89	0.00116374		TRBV5	TRBJ2-1	CASSQDPDRAEQHF	56	0.000799715		TRBV13-1	TRBJ1-2	CASSDWNSDYTF	50	0.000806438		TRBV13-1	TRBJ2-7	CASSPTGGSYEQYF	72	0.000889105
TRBV12-1	TRBJ2-4	CASSRTGGGQNTLYF	120	0.00162651		TRBV13-3	TRBJ2-7	CASSDASPGYEQYF	89	0.00116374		TRBV5	TRBJ1-2	CASSQDGTANSDYAF	56	0.000799715		TRBV12-1	TRBJ2-7	CASSHGWGGYEQYF	50	0.000806438		TRBV13-1	TRBJ2-1	CASSDRTGLSEQF	72	0.000889105
TRBV12-1	TRBJ2-2	CASSPDSGTGQPYF	120	0.00162651		TRBV13-2	TRBJ1-1	CASSGRGHTEVF	89	0.00116374		TRBV5	TRBJ1-1	CASSPGAGANTEVF	56	0.000799715		TRBV12-1	TRBJ2-5	CASSLWGEDTQYF	50	0.000806438		TRBV13-1	TRBJ1-2	CASSDADGNSDYTF	72	0.000889105
TRBV13-2	TRBJ2-7	CASSDTGFYEQYF	119	0.00161296		TRBV12-2	TRBJ2-7	CASSLGWGGSYEQYF	89	0.00116374		TRBV2	TRBJ1-1	CASSQEVDKNTEVF	56	0.000799715		TRBV12-1	TRBJ2-4	CASGERQFSQNTLYF	50	0.000806438		TRBV5	TRBJ2-7	CASGPTGGSYEQYF	71	0.000876756
TRBV13-2	TRBJ2-3	CGDGTSAETLYF	119	0.00161296		TRBV12-2	TRBJ2-1	CASSTTNNYAEQF	89	0.00116374		TRBV1	TRBJ2-7	CSGGLSYEQHF	56	0.000799715		TRBV12-1	TRBJ2-3	CASSSQGSSAETLYF	50	0.000806438		TRBV5	TRBJ2-1	CASGGGQGNYAEQF	71	0.000876756
TRBV13-2	TRBJ1-1	CASSESTGRGTEVF	119	0.00161296		TRBV12-1	TRBJ2-7	CAGSLDRASYEQYF	89	0.00116374		TRBV1	TRBJ2-3	CSAGQTSAEALYF	56	0.000799715		TRBV12-1	TRBJ1-2	CASSLNANSDHTF	50	0.000806438		TRBV5	TRBJ1-6	CTSSPDRDNSPLYF	71	0.000876756
TRBV5	TRBJ2-2	CASSAGTGNTGQRYF	118	0.00159941		TRBV5	TRBJ1-1	CASTQATEVF	88	0.00115066		TRBV1	TRBJ2-2	CSAQGSAGQLYF	56	0.000799715		TRBV5	TRBJ1-5	CASSQDLSYNNQVPLF	49	0.00079031		TRBV31	TRBJ2-1	CAWSLTGRVYAEQF	71	0.000876756
TRBV1	TRBJ2-7	CSARLGWDQYF	118	0.00159941		TRBV5	TRBJ1-1	CASSQGGVGNTEVF	88	0.00115066		TRBV1	TRBJ2-1	CSTGRAEQF	56	0.000799715		TRBV31	TRBJ2-3	CAWKYRGAETLYF	49	0.00079031		TRBV26	TRBJ1-1	CASGPTGSNTEVF	71	0.000876756
TRBV13-3	TRBJ2-7	CASSDGTGYEQYF	118	0.00159941		TRBV3	TRBJ2-1	CASSLRQGYAEQF	88	0.00115066		TRBV1	TRBJ2-1	CSARTGGVNYAEQSF	56	0.000799715		TRBV31	TRBJ2-1	CAWAWGVNYAEQF	49	0.00079031		TRBV1	TRBJ2-7	CSASGGERYF	71	0.000876756
TRBV13-2	TRBJ2-5	CASGDAGGEDT_YF	118	0.00159941		TRBV24	TRBJ1-2	CASSQGSNSDYTF	88	0.00115066		TRBV1	TRBJ2-1	CSAGRAGQLF	56	0.000799715		TRBV29	TRBJ2-7	CASSLDKSYEQYF	49	0.00079031		TRBV1	TRBJ2-7	CSADLEGNEQYF	71	0.000876756
TRBV13-2	TRBJ2-1	CASSHRLGENYAEQF	118	0.00159941		TRBV1	TRBJ1-3	CSVGTASGNTLYF	88	0.00115066		TRBV1	TRBJ1-6	CSADRDSYNLPLYF	56	0.000799715		TRBV29	TRBJ2-7	CASSDEGDEQYF	49	0.00079031		TRBV1	TRBJ2-5	CSASRDPGRDTQYF	71	0.000876756
TRBV13-1	TRBJ2-7	CASGGLGGLEQYF	118	0.00159941		TRBV1	TRBJ1-1	CSAGQEAF	88	0.00115066		TRBV1	TRBJ1-6	CSADPTDNSPLCF	56	0.000799715		TRBV29	TRBJ2-1	CAGSLGANYAEQF	49	0.00079031		TRBV1	TRBJ2-5	CSAEGQDTQCF	71	0.000876756
TRBV13-2	TRBJ2-1	CASRDFYAEQF	117	0.00158585		TRBV13-2	TRBJ2-3	CASSQGAETLYF	88	0.00115066		TRBV1	TRBJ1-3	CSADVGGSGSTLYF	56	0.000799715		TRBV26	TRBJ1-1	CVSSGTGYTEVF	49	0.00079031		TRBV1	TRBJ2-1	CGADTGAEQF	71	0.000876756
TRBV13-2	TRBJ1-3	CASGGGTGVGGNTLYF	117	0.00158585		TRBV12-1	TRBJ2-2	CANSLGQGDTGQLYF	88	0.00115066		TRBV1	TRBJ1-1	CSGGQRDAEVF	56	0.000799715		TRBV1	TRBJ2-7	CSAEQGQYF	49	0.00079031		TRBV15	TRBJ2-1	CASSLETFYAEQF	71	0.000876756
TRBV1	TRBJ1-1	CSAGTANTEVF	116	0.0015723		TRBV3	TRBJ2-2	CASSLETGDTGQLYF	87	0.00113759		TRBV1	TRBJ1-1	CSAGQANTEVSF	56	0.000799715		TRBV1	TRBJ2-7	CSAEGWGGYEQHF	49	0.00079031		TRBV13-3	TRBJ2-5	CASGDRDQDTQYF	71	0.000876756
TRBV13-2	TRBJ1-3	CASGGGQGEGNTLYF	116	0.0015723		TRBV26	TRBJ2-7	CASGLDRSSYEQYF	87	0.00113759		TRBV1	TRBJ1-1	CSAGQANTEVLF	56	0.000799715		TRBV1	TRBJ2-4	CSGSRNTLYF	49	0.00079031		TRBV13-2	TRBJ2-3	CTCSAARGGYF	71	0.000876756
TRBV13-2	TRBJ1-2	CASRDRANSDYTF	116	0.0015723		TRBV26	TRBJ2-3	CASSLAHVETLYF	87	0.00113759		TRBV1	TRBJ1-1	CSAEGRGTEAF	56	0.000799715		TRBV1	TRBJ2-4	CSGSQNTLHF	49	0.00079031		TRBV13-2	TRBJ2-1	CASGGGQGNCAEQF	71	0.000876756
TRBV29	TRBJ1-4	CASRDSSNERLF	115	0.00155874		TRBV1	TRBJ2-5	CSAVRAGDTQYF	87	0.00113759		TRBV13-3	TRBJ2-1	CASSDQSCAEQF	56	0.000799715		TRBV1	TRBJ2-4	CSGGQNTLYF	49	0.00079031		TRBV13-2	TRBJ2-1	CASDGGQGNYAEQF	71	0.000876756
TRBV26	TRBJ2-3	CASSQDLTGASAETLYF	115	0.00155874		TRBV1	TRBJ2-1	CSRDRYYAEQSF	87	0.00113759		TRBV13-2	TRBJ2-7	CASGDAQYGQYF	56	0.000799715		TRBV1	TRBJ2-4	CSAGQDWGGWQNTLYF	49	0.00079031		TRBV13-2	TRBJ1-2	CASGDRADYIF	71	0.000876756
TRBV15	TRBJ1-1	CASSLGQGDTEVLF	115	0.00155874		TRBV13-3	TRBJ2-2	CASSDASQGANTGQLYF	87	0.00113759		TRBV13-2	TRBJ2-5	CASGNGGGQDTQYF	56	0.000799715		TRBV1	TRBJ2-4	CSADQDWEGWQNTLYF	49	0.00079031		TRBV13-1	TRBJ2-1	CASSDDRTGLSEQLF	71	0.000876756
TRBV13-2	TRBJ2-7	CASSELRDWGDEQYF	115	0.00155874		TRBV13-3	TRBJ1-1	CASSMKGQANTEVF	87	0.00113759		TRBV13-2	TRBJ2-3	CASGDRLGGSAETLYF	56	0.000799715		TRBV1	TRBJ2-3	CNADRAGGAETLYF	49	0.00079031		TRBV12-1	TRBJ2-7	CASSLLGQGYEQYF	71	0.000876756
TRBV13-2	TRBJ2-4	CASSEPDWGTSQNTLYF	115	0.00155874		TRBV13-2	TRBJ2-7	CASSDPDREEYEQYF	87	0.00113759		TRBV13-2	TRBJ1-5	CASGDSGRNNQAPPF	56	0.000799715		TRBV1	TRBJ1-6	CSAEDIHNSPLYF	49	0.00079031		TRBV5	TRBJ1-4	CASGAPTGSNERLF	70	0.000864408
TRBV13-2	TRBJ2-1	CASSDSVYAEQF	115	0.00155874		TRBV13-2	TRBJ2-3	CASSSGRDAETLYF	87	0.00113759		TRBV13-2	TRBJ1-1	CASGDGGSNTEVF	56	0.000799715		TRBV1	TRBJ1-3	CTRSAVGQGAGNTLYF	49	0.00079031		TRBV5	TRBJ1-1	CASSQTGGGTEVF	70	0.000864408
TRBV12-1	TRBJ1-4	CASRDSSNERLF	115	0.00155874		TRBV12-2	TRBJ2-1	CASSPDRGHYAEQF	87	0.00113759		TRBV13-1	TRBJ2-5	CASGLGGRGQDTQYF	56	0.000799715		TRBV1	TRBJ1-2	CTRSADGGAASDYTF	49	0.00079031		TRBV5	TRBJ1-1	CASSQTGGDTEVLF	70	0.000864408
TRBV5	TRBJ2-4	CASSQDLRGGQNTLYF	114	0.00154519		TRBV12-2	TRBJ1-1	CASSLGGATEVF	87	0.00113759		TRBV13-1	TRBJ2-2	CASRQANTEQLYF	56	0.000799715		TRBV1	TRBJ1-1	CSEQGRNTEVF	49	0.00079031		TRBV2	TRBJ1-6	CASSQQVYNSPLYF	70	0.000864408
TRBV29	TRBJ1-3	CAGSLGDRGSGNTLYF	114	0.00154519		TRBV12-1	TRBJ2-7	CASSLDRGGEQYF	87	0.00113759		TRBV5	TRBJ2-3	CANMSQGRTLYCTCSGQDAETLYF	55	0.000785435		TRBV1	TRBJ1-1	CSADHGDTEVF	49	0.00079031		TRBV29	TRBJ1-6	CASSRQDYNSPPYF	70	0.000864408
TRBV1	TRBJ2-5	CSGDWGQGTQYF	114	0.00154519		TRBV12-1	TRBJ2-1	CASSLSRGLAEQF	87	0.00113759		TRBV5	TRBJ2-2	CASSQENWGETGQPYF	55	0.000785435		TRBV16	TRBJ1-1	CASSLGGTEVF	49	0.00079031		TRBV26	TRBJ2-7	CASSPGTGGYEQCF	70	0.000864408
TRBV1	TRBJ2-5	CSADWGLDAQYF	114	0.00154519		TRBV5	TRBJ2-5	CASSPSDWDQDTQYF	86	0.00112451		TRBV5	TRBJ2-1	CASGQETGGKAEQF	55	0.000785435		TRBV15	TRBJ2-7	CASSLDEGYEQYF	49	0.00079031		TRBV26	TRBJ2-1	CSLEIQSSEAGDSALYLRASSLDRIYAEQF	70	0.000864408
TRBV13-3	TRBJ2-7	CASSGGAGYEQYF	114	0.00154519		TRBV5	TRBJ1-1	CASGQDPGEATEVF	86	0.00112451		TRBV5	TRBJ2-1	CAGSQDPDRAEQYF	55	0.000785435		TRBV13-2	TRBJ1-2	CAGGEDNANSDYTF	49	0.00079031		TRBV1	TRBJ2-7	CSFSGTGSHEQYF	70	0.000864408
TRBV5	TRBJ2-7	CASSQERGLGGCEQYF	113	0.00153163		TRBV1	TRBJ2-3	CSAVWGDTLYF	86	0.00112451		TRBV5	TRBJ1-5	CASSQVSQNNRAPLF	55	0.000785435		TRBV13-1	TRBJ2-7	CASSDEGDERYF	49	0.00079031		TRBV1	TRBJ2-7	CSATGGACEQYF	70	0.000864408
TRBV1	TRBJ1-3	CSDRNSGSTLYF	113	0.00153163		TRBV1	TRBJ2-1	CSRDRCYAEQF	86	0.00112451		TRBV5	TRBJ1-2	CTSSQDGTANSDYTF	55	0.000785435		TRBV13-1	TRBJ2-1	CASEQGNYAEQF	49	0.00079031		TRBV1	TRBJ2-7	CSAGGQGYERYF	70	0.000864408
TRBV13-3	TRBJ2-7	CVSSDDWAYEQYF	113	0.00153163		TRBV13-2	TRBJ2-7	CASSDLGYEQYF	86	0.00112451		TRBV5	TRBJ1-1	CASSQGQGADTEVF	55	0.000785435		TRBV13-1	TRBJ1-3	CASSGTTGNTLYF	49	0.00079031		TRBV1	TRBJ2-7	CSADRFSYEQCF	70	0.000864408
TRBV13-3	TRBJ2-2	CASSDHRGNTGQLYF	113	0.00153163		TRBV13-2	TRBJ2-1	CASSARLGAEQF	86	0.00112451		TRBV5	TRBJ1-1	CASSQGLRGNTEVF	55	0.000785435		TRBV13-1	TRBJ1-2	CASSPGGNSDYTF	49	0.00079031		TRBV1	TRBJ2-5	CSADQSGGGTQCF	70	0.000864408
TRBV13-3	TRBJ1-6	CSAPGHFNSYNSPLYF	113	0.00153163		TRBV12-2	TRBJ2-7	CASSLDRGGEQYF	86	0.00112451		TRBV31	TRBJ2-7	CAWSRGLGGRGQYF	55	0.000785435		TRBV12-1	TRBJ2-7	CASSRDKTYGQYF	49	0.00079031		TRBV1	TRBJ2-4	CSAEGLGGSRNTLYF	70	0.000864408
TRBV13-2	TRBJ2-7	CASSDGTGYEQYF	113	0.00153163		TRBV12-1	TRBJ2-5	CASPLTGTQDTQYF	86	0.00112451		TRBV31	TRBJ1-4	CAWSRGISNERLF	55	0.000785435		TRBV12-1	TRBJ2-7	CASSPGSYEQYF	49	0.00079031		TRBV1	TRBJ2-3	CTSSVGQGNSAETLYF	70	0.000864408
TRBV13-2	TRBJ2-1	CASSDAELGGYAEQF	113	0.00153163		TRBV12-1	TRBJ2-1	CASSSGTGYAEKF	86	0.00112451		TRBV31	TRBJ1-2	CARSPQGANSDYTF	55	0.000785435		TRBV12-1	TRBJ2-7	CASSLGQNEQYF	49	0.00079031		TRBV1	TRBJ2-3	CSVGSSAGTLYF	70	0.000864408
TRBV13-2	TRBJ1-5	CASSAGTGGGQAPLF	113	0.00153163		TRBV5	TRBJ2-5	CASSRDWGDTQYF	85	0.00111144		TRBV2	TRBJ1-6	CASSQQGAGNSPLYF	55	0.000785435		TRBV12-1	TRBJ2-7	CASGDALGTYEQYF	49	0.00079031		TRBV1	TRBJ2-1	CSASQSSYAEQF	70	0.000864408
TRBV13-2	TRBJ1-3	CASGTGGPGNTLYF	113	0.00153163		TRBV26	TRBJ2-3	CASSLAHAEALYF	85	0.00111144		TRBV1	TRBJ2-7	CTRSADRGGYEQYF	55	0.000785435		TRBV12-1	TRBJ1-2	CASSLGTTNSDSTF	49	0.00079031		TRBV1	TRBJ1-6	CSAGQYSSPLYF	70	0.000864408
TRBV12-1	TRBJ2-1	CASSLVGTVYAAQF	113	0.00153163		TRBV1	TRBJ2-4	CTYSAGLGEQNALYF	85	0.00111144		TRBV1	TRBJ2-7	CSAVSGGVYGQYF	55	0.000785435		TRBV12-1	TRBJ1-2	CASSLGTTNSDHTF	49	0.00079031		TRBV1	TRBJ1-5	CSAGTGVN_APLF	70	0.000864408
TRBV5	TRBJ2-3	CTSSQDLTGASAETLYF	112	0.00151808		TRBV1	TRBJ2-4	CSAGLGEQITLYF	85	0.00111144		TRBV1	TRBJ2-7	CSARGQGDEQYF	55	0.000785435		TRBV3	TRBJ2-1	CASSLGQYNYAEQLF	48	0.000774181		TRBV1	TRBJ1-3	CSTTGVGGNTLYF	70	0.000864408
TRBV1	TRBJ2-1	CSALGGPYNYAEQF	112	0.00151808		TRBV1	TRBJ2-3	CSADPAGTLYF	85	0.00111144		TRBV1	TRBJ2-4	CSGQRQNTLYF	55	0.000785435		TRBV31	TRBJ2-5	CASNRGDTQYF	48	0.000774181		TRBV15	TRBJ2-7	CASSQGGREQYF	70	0.000864408
TRBV13-2	TRBJ1-4	CASNAVSNERLF	112	0.00151808		TRBV1	TRBJ1-2	CSAGANSDYAF	85	0.00111144		TRBV1	TRBJ2-4	CSADGDWGSQSTLYF	55	0.000785435		TRBV29	TRBJ2-3	CASSATSAETLYF	48	0.000774181		TRBV15	TRBJ1-1	CARSLDRANTEVF	70	0.000864408
TRBV13-2	TRBJ1-3	CASGDRTNSGNTLYF	112	0.00151808		TRBV16	TRBJ1-4	CASGLQISNERLF	85	0.00111144		TRBV1	TRBJ2-3	CSADPETLHF	55	0.000785435		TRBV29	TRBJ2-1	CASSSGGALAGQF	48	0.000774181		TRBV13-3	TRBJ2-7	CASSHGLGSSYEQYF	70	0.000864408
TRBV13-1	TRBJ2-7	CASSDTDRGGEQYF	112	0.00151808		TRBV13-2	TRBJ1-6	CASSDEDTSYNSPLYF	85	0.00111144		TRBV1	TRBJ2-2	CSAQGSTGQPYF	55	0.000785435		TRBV1	TRBJ2-7	CGAGQTGGAYEQYF	48	0.000774181		TRBV13-3	TRBJ2-5	CASSLEGRGQDTQYF	70	0.000864408
TRBV12-2	TRBJ2-7	CASSLGGADEQYF	112	0.00151808		TRBV13-2	TRBJ1-1	CASSDRGTEVF	85	0.00111144		TRBV1	TRBJ2-2	CSAGQYTGQPYF	55	0.000785435		TRBV1	TRBJ2-5	CSERDWGRQDTQYF	48	0.000774181		TRBV13-3	TRBJ1-4	CTCMALSNERLF	70	0.000864408
TRBV12-2	TRBJ2-1	CASSPTENYAEQF	112	0.00151808		TRBV12-1	TRBJ2-5	CAGSLTGTQDTQYF	85	0.00111144		TRBV1	TRBJ2-1	CTRSRRGYAEQF	55	0.000785435		TRBV1	TRBJ2-5	CSERDWGPQDTQYF	48	0.000774181		TRBV13-3	TRBJ1-1	CASSETSTEVF	70	0.000864408
TRBV1	TRBJ2-7	CSAWRGYEQYF	111	0.00150453		TRBV12-1	TRBJ2-1	CASSLLQGYAEQLF	85	0.00111144		TRBV1	TRBJ2-1	CSARTGGANYAEQF	55	0.000785435		TRBV1	TRBJ2-4	CTRSGSQNTLYF	48	0.000774181		TRBV13-2	TRBJ2-7	CAGGGPGQYEQYF	70	0.000864408
TRBV15	TRBJ2-4	CACRQRDRGRGQNTLYF	111	0.00150453		TRBV5	TRBJ2-2	CASSQDPGNTGQLYF	84	0.00109836		TRBV1	TRBJ2-1	CSAGQAEQF	55	0.000785435		TRBV1	TRBJ2-4	CSADQDWGGWQSTLYF	48	0.000774181		TRBV13-2	TRBJ1-1	CASGGGQGPNTEVF	70	0.000864408
TRBV13-2	TRBJ2-7	CASSDGTGGYEQYF	111	0.00150453		TRBV13-3	TRBJ2-7	CASSLRDNPYEQYF	84	0.00109836		TRBV1	TRBJ2-1	CSAEYAEQLF	55	0.000785435		TRBV1	TRBJ1-1	CSAGGGNTEVLF	48	0.000774181		TRBV13-1	TRBJ1-2	CASSDAAESSDYTF	70	0.000864408
TRBV13-2	TRBJ2-3	CASSGTTSAETLYF	111	0.00150453		TRBV13-3	TRBJ2-7	CASSDASLGYEQYF	84	0.00109836		TRBV1	TRBJ1-4	CTRSAPGQPLSNERLF	55	0.000785435		TRBV19	TRBJ2-1	CASSIAQGIYAEQF	48	0.000774181		TRBV13-1	TRBJ1-1	CASSLDRANTEVF	70	0.000864408
TRBV13-2	TRBJ2-3	CASSGPGREAETLYF	111	0.00150453		TRBV13-2	TRBJ2-4	CASGGQNTLYF	84	0.00109836		TRBV1	TRBJ1-1	CSASGTGGTEAF	55	0.000785435		TRBV15	TRBJ2-5	CASSFRGPEDTQYF	48	0.000774181		TRBV5	TRBJ2-7	CASSGLGEGEQYF	69	0.000852059
TRBV13-2	TRBJ1-3	CASGDTGALSGNTLYF	111	0.00150453		TRBV13-2	TRBJ1-5	CASSATGEDNQAPLF	84	0.00109836		TRBV1	TRBJ1-1	CSAGRVVF	55	0.000785435		TRBV15	TRBJ2-2	CASSFRDRENTGQLYF	48	0.000774181		TRBV5	TRBJ2-3	CAGSQDGGAVAETLYF	69	0.000852059
TRBV1	TRBJ2-3	CSADSGASAEKLYF	110	0.00149097		TRBV13-2	TRBJ1-2	CASSDISNSDYTF	84	0.00109836		TRBV1	TRBJ1-1	CSAGGQANTEVLF	55	0.000785435		TRBV15	TRBJ1-4	CASSLSHFSDERLF	48	0.000774181		TRBV5	TRBJ2-1	CASSHGLGGRGAEQF	69	0.000852059
TRBV1	TRBJ1-6	CSAPGHFNSYNSPRYF	110	0.00149097		TRBV13-2	TRBJ1-1	CASSWDRNTEVF	84	0.00109836		TRBV1	TRBJ1-1	CSAEGRGAEVF	55	0.000785435		TRBV15	TRBJ1-2	CASSPGGSDYTF	48	0.000774181		TRBV5	TRBJ2-1	CASGQARDRYAEQF	69	0.000852059
TRBV16	TRBJ2-2	CASSLGGGNTGQLYF	110	0.00149097		TRBV13-2	TRBJ1-1	CASSPGTTNTEVF	84	0.00109836		TRBV1	TRBJ1-1	CREGAGTEVLF	55	0.000785435		TRBV14	TRBJ1-4	CASSLRGPNERLF	48	0.000774181		TRBV5	TRBJ1-6	CASGPGTNSYNSPLYF	69	0.000852059
TRBV13-2	TRBJ2-7	CASSDGQGGYEQYF	110	0.00149097		TRBV12-1	TRBJ2-7	CASSLETGGIYEQYF	84	0.00109836		TRBV1	TRBJ1-1	CNPGQSNTEVF	55	0.000785435		TRBV13-3	TRBJ2-7	CASGEGTGGYEQYF	48	0.000774181		TRBV5	TRBJ1-5	CASSQDWGGNNQAPPF	69	0.000852059
TRBV13-2	TRBJ2-4	CASSDARQNTLYF	110	0.00149097		TRBV12-1	TRBJ1-3	CASSADNSGNTLYF	84	0.00109836		TRBV13-3	TRBJ2-1	CASGDQSYAEQF	55	0.000785435		TRBV13-3	TRBJ2-5	CASSGTGGHQDTQYF	48	0.000774181		TRBV5	TRBJ1-1	CASSQAGGDTEVF	69	0.000852059
TRBV13-2	TRBJ2-1	CVSGEDWGGPYAEQF	110	0.00149097		TRBV3	TRBJ2-7	CASSRDRAYEQYF	83	0.00108529		TRBV13-2	TRBJ1-6	CTCSADPTDNSPLYF	55	0.000785435		TRBV13-3	TRBJ1-4	CAGSSSNERLF	48	0.000774181		TRBV5	TRBJ1-1	CASSLKSNSNTEVF	69	0.000852059
TRBV13-2	TRBJ1-3	CASGDSGHSGNTLYF	110	0.00149097		TRBV31	TRBJ2-3	CAWSLGTGGSAETLCF	83	0.00108529		TRBV13-2	TRBJ1-2	CASGDAEGASDYAF	55	0.000785435		TRBV13-2	TRBJ2-4	CASGERQFSQNTSYF	48	0.000774181		TRBV5	TRBJ1-1	CASGQGQGDTEVF	69	0.000852059
TRBV13-3	TRBJ2-5	CASSDASGDEQYF	109	0.00147742		TRBV24	TRBJ2-1	CASSHTGAAEQF	83	0.00108529		TRBV13-2	TRBJ1-1	CASGETGGLTEVF	55	0.000785435		TRBV13-1	TRBJ2-5	CASSQDWGPQDTQYF	48	0.000774181		TRBV3	TRBJ2-2	CASSLDWGSTGQLYF	69	0.000852059
TRBV13-2	TRBJ2-7	CASSDGGGYEQYF	109	0.00147742		TRBV1	TRBJ2-1	CSAEPGLYAEQSF	83	0.00108529		TRBV13-1	TRBJ2-7	CASGAAGTGGPLSYEQYF	55	0.000785435		TRBV13-1	TRBJ2-5	CASGGTGDTQYF	48	0.000774181		TRBV31	TRBJ2-1	CAWSLIGGVYAEQF	69	0.000852059
TRBV13-2	TRBJ2-7	CASGGTAYERYF	109	0.00147742		TRBV13-3	TRBJ2-7	CASGEGGYEQYF	83	0.00108529		TRBV13-1	TRBJ2-4	CASSAGSQNTLYF	55	0.000785435		TRBV13-1	TRBJ1-2	CASSAQGASSDYTF	48	0.000774181		TRBV31	TRBJ2-1	CAWRLTGGVYAEQF	69	0.000852059
TRBV12-2	TRBJ2-2	CASSLGANTGQLYF	109	0.00147742		TRBV5	TRBJ2-5	CASSQDPGVQDT_YF	82	0.00107221		TRBV5	TRBJ2-3	CASSQGLGVGAETLYF	54	0.000771154		TRBV12-1	TRBJ1-2	CASSLGTTNSDYPF	48	0.000774181		TRBV31	TRBJ1-5	CASRDTDNQAPLF	69	0.000852059
TRBV5	TRBJ2-1	CASSQDMGGGEQYF	107	0.00145031		TRBV5	TRBJ2-1	CAGSPDNNYAEQF	82	0.00107221		TRBV5	TRBJ2-3	CASSPRGAETLYF	54	0.000771154		TRBV12-1	TRBJ1-2	CASGERDKNSDYTF	48	0.000774181		TRBV1	TRBJ2-7	CSVEGGGEQYF	69	0.000852059
TRBV5	TRBJ2-3	CANSQDLTGASAETLYF	106	0.00143675		TRBV3	TRBJ2-5	CASSLEHQDTQYF	82	0.00107221		TRBV5	TRBJ2-3	CAGSQDLGVGAETLYF	54	0.000771154		TRBV12-1	TRBJ1-2	CASGDRENSDYTF	48	0.000774181		TRBV1	TRBJ2-5	CSNPTGGPDQDTQYF	69	0.000852059
TRBV31	TRBJ1-1	CAWSLGGANAEVF	106	0.00143675		TRBV26	TRBJ2-7	CASSLGRSSYEQYF	82	0.00107221		TRBV5	TRBJ2-2	CASSQENWGEAGQLYF	54	0.000771154		TRBV5	TRBJ2-5	CASSRDGGGQDTQYF	47	0.000758052		TRBV1	TRBJ2-5	CSNPIGGPNQDTQYF	69	0.000852059
TRBV13-2	TRBJ2-7	CASSEGYEQYF	106	0.00143675		TRBV1	TRBJ2-4	CSKLGASQNALYF	82	0.00107221		TRBV5	TRBJ2-1	CASSQATNYAGQF	54	0.000771154		TRBV5	TRBJ1-4	CASSQRDSNERLF	47	0.000758052		TRBV1	TRBJ2-3	CSAARGGHF	69	0.000852059
TRBV13-2	TRBJ2-1	CASSGGGWYAEQF	106	0.00143675		TRBV1	TRBJ2-1	CSAPWGGYAKQF	82	0.00107221		TRBV5	TRBJ2-1	CASGDGTGGAEQF	54	0.000771154		TRBV5	TRBJ1-4	CASSQEGSREGLF	47	0.000758052		TRBV1	TRBJ2-1	CSGTGGGNYAEQF	69	0.000852059
TRBV13-2	TRBJ1-4	CASSDGRGRSNERLF	106	0.00143675		TRBV1	TRBJ1-1	CSADDGRANTEVF	82	0.00107221		TRBV31	TRBJ2-5	CAWGRDNQDTQYF	54	0.000771154		TRBV31	TRBJ2-7	CAWRRTGPEQCF	47	0.000758052		TRBV1	TRBJ2-1	CKPGLGDAERF	69	0.000852059
TRBV13-2	TRBJ2-7	CASSGTGGSSYEQYF	105	0.0014232		TRBV13-2	TRBJ2-5	CASSDRTGDTQYF	82	0.00107221		TRBV1	TRBJ2-7	CTRSADWGSYEQYF	54	0.000771154		TRBV31	TRBJ2-1	CAWTWGVNYAEQSF	47	0.000758052		TRBV1	TRBJ2-1	CGASQSNYAEQF	69	0.000852059
TRBV13-2	TRBJ2-5	CASSDAGGRDTQYF	105	0.0014232		TRBV13-2	TRBJ2-4	CAGLGEQNTLYF	82	0.00107221		TRBV1	TRBJ2-7	CSARDWGNEQYF	54	0.000771154		TRBV29	TRBJ2-7	CASGGPGLSSYEQYF	47	0.000758052		TRBV1	TRBJ1-6	CSAGQRNSPLHF	69	0.000852059
TRBV13-2	TRBJ2-3	CASSDAPSAETLYF	105	0.0014232		TRBV13-2	TRBJ1-4	CAGGEPREDERLF	82	0.00107221		TRBV1	TRBJ2-7	CSAGLGGRGQYF	54	0.000771154		TRBV26	TRBJ2-7	CASSLDKSYEQYF	47	0.000758052		TRBV1	TRBJ1-5	CSAD_GAAPLF	69	0.000852059
TRBV13-2	TRBJ1-5	CASSSNNQAPLF	105	0.0014232		TRBV12-2	TRBJ1-3	CASSADNSGNTLYF	82	0.00107221		TRBV1	TRBJ2-5	CTRSAGGQDTQYF	54	0.000771154		TRBV1	TRBJ2-4	CAGHQDTLYF	47	0.000758052		TRBV1	TRBJ1-5	CNADQEAPLF	69	0.000852059
TRBV20	TRBJ2-1	CGVRGTENYAEQF	104	0.00140965		TRBV12-1	TRBJ2-5	CASSLPGVSQDTQYF	82	0.00107221		TRBV1	TRBJ2-5	CSARGRDQGTQYF	54	0.000771154		TRBV1	TRBJ2-3	CSADRAGGAEMLYF	47	0.000758052		TRBV19	TRBJ1-1	CASSIDRGDTEVF	69	0.000852059
TRBV1	TRBJ1-6	CSAPGQFNSYNSPLYF	104	0.00140965		TRBV12-1	TRBJ2-1	CASSPDRGHYAEQF	82	0.00107221		TRBV1	TRBJ2-1	CTRSAVGLGGGAEQF	54	0.000771154		TRBV1	TRBJ1-4	CSAEPISNEK_SF	47	0.000758052		TRBV13-1	TRBJ1-2	CASSDADRNSDCTF	69	0.000852059
TRBV13-2	TRBJ2-1	CASSPGGNYAEQF	104	0.00140965		TRBV5	TRBJ2-1	CASSPRDSYAEQF	81	0.00105913		TRBV1	TRBJ2-1	CSAQDWGF	54	0.000771154		TRBV1	TRBJ1-1	CTRSAPGTDGTEVF	47	0.000758052		TRBV13-1	TRBJ1-2	CASGDAAENSDYTF	69	0.000852059
TRBV13-2	TRBJ2-1	CASGDREYAEQF	104	0.00140965		TRBV3	TRBJ2-7	CASSLTGTGREQYF	81	0.00105913		TRBV1	TRBJ2-1	CSAGDWGDHAEQLF	54	0.000771154		TRBV1	TRBJ1-1	CTGSADHGGTEVF	47	0.000758052		TRBV13-1	TRBJ1-1	CASSDVGEAF	69	0.000852059
TRBV13-1	TRBJ2-7	CASGDSYEQYF	104	0.00140965		TRBV26	TRBJ2-1	CASSLYPQGRYAEQF	81	0.00105913		TRBV1	TRBJ1-6	CSAGQYSSPLYF	54	0.000771154		TRBV19	TRBJ1-4	CASSMGTLNERLF	47	0.000758052		TRBV12-1	TRBJ2-7	CASSLSGQGGEQYF	69	0.000852059
TRBV5	TRBJ2-4	CASSQGGGGGGSSQNTLYF	103	0.00139609		TRBV1	TRBJ1-1	CSAGGSTEVF	81	0.00105913		TRBV1	TRBJ1-4	CSADWGRGERLF	54	0.000771154		TRBV17	TRBJ1-4	CAGSREGNERLF	47	0.000758052		TRBV5	TRBJ2-5	CASSQDLVNQGTQYF	68	0.00083971
TRBV5	TRBJ2-3	CASSQDLTGASTETLYF	103	0.00139609		TRBV1	TRBJ1-1	CSAGGNAEVF	81	0.00105913		TRBV1	TRBJ1-1	CSSGQSNTEVF	54	0.000771154		TRBV16	TRBJ2-5	CASSLDLREDEQYF	47	0.000758052		TRBV5	TRBJ2-1	CASSRNRNYAEQF	68	0.00083971
TRBV14	TRBJ2-1	CASSFRGRAGQF	103	0.00139609		TRBV1	TRBJ1-1	CGAGQEVF	81	0.00105913		TRBV1	TRBJ1-1	CSASGGDAEVF	54	0.000771154		TRBV15	TRBJ2-1	CASSFRDWGHAEQF	47	0.000758052		TRBV5	TRBJ2-1	CASSQGLGRRGAEQF	68	0.00083971
TRBV13-2	TRBJ1-1	CASGDEGGETGVF	103	0.00139609		TRBV13-2	TRBJ2-3	CASSERGGAETLYF	81	0.00105913		TRBV1	TRBJ1-1	CSADGSANTEAF	54	0.000771154		TRBV15	TRBJ2-1	CASRSTGGYSYAEQF	47	0.000758052		TRBV5	TRBJ1-4	CASSQAGTEDGERLF	68	0.00083971
TRBV12-2	TRBJ2-1	CASSRLGDYAEQF	103	0.00139609		TRBV12-2	TRBJ2-7	CASSLGGGDEQYF	81	0.00105913		TRBV13-2	TRBJ2-7	CASGDAQCEQYF	54	0.000771154		TRBV14	TRBJ2-3	CASSPDRTETLYF	47	0.000758052		TRBV1	TRBJ2-7	CTYSADLGGNEQYF	68	0.00083971
TRBV13-2	TRBJ2-4	CASSLGQNTLYF	102	0.00138254		TRBV12-1	TRBJ2-1	CASSLGQGNYAEQF	81	0.00105913		TRBV13-2	TRBJ2-3	CASGGQLGGSAETLYF	54	0.000771154		TRBV13-3	TRBJ2-5	CASSRTGGHQDTQYF	47	0.000758052		TRBV1	TRBJ2-7	CSATRGAYEQYF	68	0.00083971
TRBV13-2	TRBJ1-1	CASSDATEVF	102	0.00138254		TRBV5	TRBJ2-5	CASSQDPGVRDTQYF	80	0.00104606		TRBV13-2	TRBJ2-2	CASGETGANTGQPYF	54	0.000771154		TRBV13-3	TRBJ2-1	CASSDPGQSYAEQF	47	0.000758052		TRBV1	TRBJ2-4	CSPGLGGQDTQYF	68	0.00083971
TRBV13-2	TRBJ1-1	CASSDANQGGNTEVF	102	0.00138254		TRBV26	TRBJ2-3	CASSPAHAETLYF	80	0.00104606		TRBV13-2	TRBJ2-2	CANMSQGRTLYCTCSAVRDSNTGQLYF	54	0.000771154		TRBV13-3	TRBJ1-1	CASSGYRTNTEVF	47	0.000758052		TRBV1	TRBJ2-4	CSGDNSQNTWYF	68	0.00083971
TRBV13-1	TRBJ2-4	CASGEQGENTLYF	102	0.00138254		TRBV26	TRBJ1-1	CASSQGNTEVF	80	0.00104606		TRBV13-2	TRBJ1-4	CGDASNERLF	54	0.000771154		TRBV13-3	TRBJ1-1	CASSDAQSTEVF	47	0.000758052		TRBV1	TRBJ2-4	CSAGDSQDTLYF	68	0.00083971
TRBV1	TRBJ1-6	CSARGHFNSYNSPLYF	101	0.00136898		TRBV24	TRBJ1-6	CASSRDKNNSPLYF	80	0.00104606		TRBV13-2	TRBJ1-4	CAPGQPLSNERLF	54	0.000771154		TRBV13-2	TRBJ2-4	CASSDSQNTLYF	47	0.000758052		TRBV1	TRBJ2-4	CSAGDGQNTLYF	68	0.00083971
TRBV1	TRBJ1-5	CSAGPNNRAPLF	101	0.00136898		TRBV1	TRBJ2-7	CSPGQMIYEQYF	80	0.00104606		TRBV13-2	TRBJ1-2	CAGGGTATNSDYTF	54	0.000771154		TRBV13-2	TRBJ2-2	CTGQLYF	47	0.000758052		TRBV1	TRBJ2-1	CSVRDSNYAEQF	68	0.00083971
TRBV1	TRBJ1-1	CSAPGQENTEVF	101	0.00136898		TRBV1	TRBJ2-7	CSPGQIVYEQYF	80	0.00104606		TRBV13-2	TRBJ1-1	CVSGQGRDTEVF	54	0.000771154		TRBV13-2	TRBJ2-1	CASSTGAEQF	47	0.000758052		TRBV1	TRBJ1-5	CSADQEALLF	68	0.00083971
TRBV15	TRBJ2-7	CASSLGTGRYEQYF	101	0.00136898		TRBV1	TRBJ2-7	CSAGQIIYEQYF	80	0.00104606		TRBV13-2	TRBJ1-1	CASGETGGYTEVF	54	0.000771154		TRBV13-2	TRBJ1-4	CASSRQGSNERLF	47	0.000758052		TRBV1	TRBJ1-5	CSADQAAPLF	68	0.00083971
TRBV13-2	TRBJ1-4	CASSGTISNERLF	101	0.00136898		TRBV1	TRBJ2-4	CSAGLGEQNTL_F	80	0.00104606		TRBV13-2	TRBJ1-1	CASGETGGSTAVF	54	0.000771154		TRBV13-1	TRBJ2-4	CARLGVQNTLYF	47	0.000758052		TRBV1	TRBJ1-4	CMALSNERLLF	68	0.00083971
TRBV5	TRBJ1-3	CASSQNPNSGNTLYF	100	0.00135543		TRBV1	TRBJ2-3	CSAGLGPSAETLYF	80	0.00104606		TRBV13-1	TRBJ2-2	CASRQANTGQLHF	54	0.000771154		TRBV13-1	TRBJ1-4	CSADANNERLF	47	0.000758052		TRBV1	TRBJ1-2	CRGPGYTF	68	0.00083971
TRBV1	TRBJ1-6	CSAP_HFNSYNSPLYF	100	0.00135543		TRBV1	TRBJ2-1	CSRDRYYAERF	80	0.00104606		TRBV5	TRBJ1-2	CASSQGDPDYTF	53	0.000756873		TRBV13-1	TRBJ1-2	CASGEDNANSDYTF	47	0.000758052		TRBV1	TRBJ1-1	CQGTENAEVF	68	0.00083971
TRBV1	TRBJ1-5	CTRSAGPNNQAPLF	100	0.00135543		TRBV1	TRBJ1-3	CSAGTAPGNTLYF	80	0.00104606		TRBV5	TRBJ1-1	CASSQSIATNTEVF	53	0.000756873		TRBV12-1	TRBJ2-7	CPSSLDKSYEQYF	47	0.000758052		TRBV1	TRBJ1-1	CGAEGATEVF	68	0.00083971
TRBV13-3	TRBJ1-1	CASSASGRDTEVF	100	0.00135543		TRBV16	TRBJ1-1	CASSLGQTANTEVLF	80	0.00104606		TRBV31	TRBJ2-2	CAWSHISQILQHCQL_AF	53	0.000756873		TRBV12-1	TRBJ2-7	CASSRDRGGEQYF	47	0.000758052		TRBV15	TRBJ2-5	CASSLDGGQDTQYF	68	0.00083971
TRBV13-1	TRBJ2-7	CASSDLGAYEQYF	100	0.00135543		TRBV13-3	TRBJ2-7	CTSSQTGGKVYEQYF	80	0.00104606		TRBV31	TRBJ1-3	CAWSPTGSGSTLYF	53	0.000756873		TRBV12-1	TRBJ2-7	CASSDAGSSYEQYF	47	0.000758052		TRBV13-3	TRBJ2-3	CASSDARGPSTETLYF	68	0.00083971
TRBV29	TRBJ1-1	CASSLTGPSTTEVF	99	0.00134187		TRBV13-3	TRBJ2-7	CASSDASQGYVQYF	80	0.00104606		TRBV1	TRBJ2-7	CTRSAKGQGDEQYF	53	0.000756873		TRBV12-1	TRBJ1-4	CASSPDRISNERLF	47	0.000758052		TRBV13-3	TRBJ1-5	CASSGPTNNSQAPLF	68	0.00083971
TRBV1	TRBJ1-1	CSAGTGGTEVF	99	0.00134187		TRBV13-2	TRBJ2-5	CASGVDS_DTQYF	80	0.00104606		TRBV1	TRBJ2-5	CSGTGGARGTQYF	53	0.000756873		TRBV31	TRBJ2-3	CARSLGQGAGAETLYF	46	0.000741923		TRBV13-3	TRBJ1-3	CASSWDGPGNTLYF	68	0.00083971
TRBV13-3	TRBJ1-1	CASSWIQNTEVF	99	0.00134187		TRBV13-1	TRBJ2-7	CASGEGGYEQYF	80	0.00104606		TRBV1	TRBJ2-5	CGAGGLGQDTQYF	53	0.000756873		TRBV29	TRBJ2-3	CASSWTASAGTLYF	46	0.000741923		TRBV13-1	TRBJ2-3	CASSRGTNSAETLYF	68	0.00083971
TRBV13-2	TRBJ2-7	CASSDDWAYEQYF	99	0.00134187		TRBV12-1	TRBJ2-3	CASPLEGWGSAETLYF	80	0.00104606		TRBV1	TRBJ2-4	CSAGGVSQSTLYF	53	0.000756873		TRBV26	TRBJ2-7	CASSPDKTYEQYF	46	0.000741923		TRBV13-1	TRBJ2-1	CASSDDRTGLSGQF	68	0.00083971
TRBV13-2	TRBJ2-5	CASGPTGGNQGTQYF	99	0.00134187		TRBV5	TRBJ2-5	CATGTGGLQDTQYF	79	0.00103298		TRBV1	TRBJ2-4	CSADQGRQNTVYF	53	0.000756873		TRBV26	TRBJ1-1	CASSSGPSTEVF	46	0.000741923		TRBV13-1	TRBJ1-2	CASSDEGGANSDYAF	68	0.00083971
TRBV13-2	TRBJ2-1	CASGEDWGGPYAERF	99	0.00134187		TRBV5	TRBJ2-5	CASSLGGQDTQYF	79	0.00103298		TRBV1	TRBJ2-4	CSADLRRQNTLYF	53	0.000756873		TRBV26	TRBJ1-1	CASSPPANTEVF	46	0.000741923		TRBV13-1	TRBJ1-2	CAGSDEGGANSDYTF	68	0.00083971
TRBV13-2	TRBJ1-5	CASSAGQGHQAPLF	99	0.00134187		TRBV1	TRBJ2-5	CSAAWGRDTQYF	79	0.00103298		TRBV1	TRBJ2-3	CSAGQTSAGTLYF	53	0.000756873		TRBV1	TRBJ2-7	CSASGTEVLF	46	0.000741923		TRBV5	TRBJ2-5	CASSQDSQDTQYF	67	0.000827362
TRBV31	TRBJ1-4	CARSRDREDERLF	98	0.00132832		TRBV13-2	TRBJ1-5	CASSGQNNQAQHF	79	0.00103298		TRBV1	TRBJ2-2	CSAGTSNTGQPYF	53	0.000756873		TRBV1	TRBJ2-7	CSAGQTGGAYGQYF	46	0.000741923		TRBV5	TRBJ2-5	CASRDPGGDTQYF	67	0.000827362
TRBV1	TRBJ1-6	CSADLGYNSPLYF	98	0.00132832		TRBV13-2	TRBJ1-2	CASSDRNSDYTF	79	0.00103298		TRBV1	TRBJ2-2	CSAGRYTGQLYF	53	0.000756873		TRBV1	TRBJ2-7	CGASGNEQYF	46	0.000741923		TRBV5	TRBJ2-1	CTSSQGLGGRGAEQF	67	0.000827362
TRBV1	TRBJ1-1	CGAGTPEVF	98	0.00132832		TRBV13-1	TRBJ1-1	CASSDAQGADTEVF	79	0.00103298		TRBV1	TRBJ2-1	CSRRGYAGQF	53	0.000756873		TRBV1	TRBJ2-4	CSADGLGVSQNTLYF	46	0.000741923		TRBV5	TRBJ1-6	CASSQDRDRGSPPYF	67	0.000827362
TRBV13-2	TRBJ2-7	CASSDARDRGGEQYF	98	0.00132832		TRBV5	TRBJ2-5	CASSQEEGGPQDTQYF	78	0.00101991		TRBV1	TRBJ2-1	CSARDWGLAEQF	53	0.000756873		TRBV1	TRBJ2-3	CGADRPSAETLYF	46	0.000741923		TRBV5	TRBJ1-4	CASSPRRGISNERLF	67	0.000827362
TRBV13-2	TRBJ2-1	CASSDPDNYAEQF	98	0.00132832		TRBV5	TRBJ2-5	CASSPLQGKDTQYF	78	0.00101991		TRBV1	TRBJ2-1	CSAGDWGDHAEQSF	53	0.000756873		TRBV1	TRBJ1-4	CTRSADANNKRLF	46	0.000741923		TRBV5	TRBJ1-2	CASSLGTANSDYTF	67	0.000827362
TRBV13-2	TRBJ1-6	CASSDVQGSNSPLYF	98	0.00132832		TRBV5	TRBJ1-1	CASSWDRNTEVF	78	0.00101991		TRBV1	TRBJ2-1	CGARDWGF	53	0.000756873		TRBV1	TRBJ1-4	CSADANNKRLLF	46	0.000741923		TRBV5	TRBJ1-1	CASSQGTTNTEVLF	67	0.000827362
TRBV13-2	TRBJ1-2	CASSGENSDYTF	98	0.00132832		TRBV26	TRBJ1-4	CSLEIQSSEAGDSALYLRASSPDRVNERLF	78	0.00101991		TRBV1	TRBJ1-6	CSAGQYNSPLHF	53	0.000756873		TRBV1	TRBJ1-3	CSAAGQGAGNTLYF	46	0.000741923		TRBV5	TRBJ1-1	CASSQGTANTEVF	67	0.000827362
TRBV5	TRBJ2-3	CASSQDLTGGSAETLYF	97	0.00131477		TRBV24	TRBJ2-5	CASSLRGDTQYF	78	0.00101991		TRBV1	TRBJ1-6	CSAGQHNSPLYF	53	0.000756873		TRBV1	TRBJ1-2	CRLRDRGDSDCTF	46	0.000741923		TRBV31	TRBJ2-1	CASSGGGNYAEQF	67	0.000827362
[truncated: 102,145 more rows]

## Sheet: 8 W
CCl4 group
CCl4-1						CCl4-2						CCl4-3						CCl4-4						CCl4-5
[truncated: 48,692 more rows]
