# Supplementary material for: The T Cell Receptor Immune Repertoire Protects the Liver From Reconsitution
Source: Front Immunol. 2020 Dec 18;11:584979. doi: 10.3389/fimmu.2020.584979 (PMC7775400; doi:10.3389/fimmu.2020.584979)
Supplement: Supplementary file 14 [file Table_13.xlsx]

## Sheet: Ctrl
Ctrl group
Ctrl-1				Ctrl-2				Ctrl-3				Ctrl-4				Ctrl-5
CDR3 terminal AA	Reads	Percentage(%)		CDR3 terminal AA	Reads	Percentage(%)		CDR3 terminal AA	Reads	Percentage(%)		CDR3 terminal AA	Reads	Percentage(%)		CDR3 terminal AA	Reads	Percentage(%)
LYF	2220206	30.0933		LYF	2522611	32.985		LYF	2281100	32.5755		LYF	1664380	26.8444		LYF	2069806	25.5594
QYF	2051901	27.812		QYF	2368968	30.976		QYF	1946402	27.7958		QYF	1541603	24.8642		QYF	1958541	24.1854
EVF	981538	13.304		EVF	933632	12.2079		EVF	1227541	17.5301		RLF	1387333	22.376		EVF	1754321	21.6636
EQF	765707	10.3786		EQF	738351	9.65448		EQF	561011	8.01159		EVF	578887	9.33673		EQF	944921	11.6685
RLF	511476	6.93269		RLF	422682	5.52688		RLF	511587	7.30578		EQF	556043	8.96829		PLF	453906	5.60514
YTF	480503	6.51287		YTF	330727	4.3245		YTF	251523	3.59191		YTF	279408	4.50651		YTF	422292	5.21475
PLF	231766	3.14142		PLF	106379	1.39098		PLF	69491	0.992375		PLF	101445	1.63618		RLF	307961	3.80291
KVF	20491	0.277741		QHF	92114	1.20446		QHF	38566	0.550747		PFF	8229	0.132724		GYF	47967	0.592329
PYF	7916	0.107296		TLF	12847	0.167984		WGF	22099	0.315588		PYF	6285	0.101369		GQF	21760	0.268707
GVF	7789	0.105574		QVF	12676	0.165748		GVF	9223	0.13171		GVF	5215	0.0841115		TIF	17005	0.209989
GRF	5995	0.0812579		GVF	9247	0.120911		PYF	8635	0.123313		GLF	5102	0.082289		KVF	13758	0.169893
RYF	5554	0.0752805		RVF	7460	0.097545		HVF	6554	0.0935953		ERF	3890	0.0627409		VLF	7348	0.0907381
LCF	5103	0.0691675		LHF	7364	0.0962897		PPF	5980	0.0853982		RYF	3585	0.0578216		EAF	6412	0.0791797
QGF	4433	0.0600861		AVF	6909	0.0903402		RYF	5279	0.0753874		LLF	3399	0.0548217		PYF	5982	0.0738698
VLF	4054	0.0549491		PYF	6453	0.0843777		VLF	4510	0.0644056		VLF	3352	0.0540636		RYF	4769	0.0588909
RSF	3944	0.0534581		RYF	5423	0.0709097		GQF	4286	0.0612068		LSF	3265	0.0526604		QSF	4725	0.0583475
LHF	3858	0.0522924		QLF	4625	0.0604753		EAF	4012	0.0572939		LHF	2948	0.0475476		VSF	4162	0.0513952
QCF	3775	0.0511674		QCF	4242	0.0554673		LHF	3944	0.0563228		_SF	2906	0.0468702		LHF	3261	0.040269
GTF	3696	0.0500966		GGF	4159	0.054382		QCF	2657	0.0379436		QHF	2801	0.0451767		GVF	3145	0.0388366
QHF	3623	0.0491072		TGF	3937	0.0514792		LCF	2551	0.0364299		LCF	2662	0.0429348		QLF	3026	0.0373671
QLF	3579	0.0485108		LCF	3885	0.0507992		VSF	2423	0.034602		LGF	2642	0.0426122		LCF	2991	0.0369349
EAF	2975	0.040324		VLF	3722	0.0486679		SYF	2219	0.0316887		QCF	2637	0.0425316		QCF	2768	0.0341811
LDF	2871	0.0389143		EAF	2785	0.0364159		QSF	2048	0.0292467		QSF	2181	0.0351768		QHF	2492	0.0307729
QVF	2675	0.0362577		QSF	2276	0.0297604		QLF	1793	0.0256052		GQF	2171	0.0350156		RNF	2481	0.0306371
QSF	2550	0.0345634		_YF	2113	0.027629		_YF	1751	0.0250054		RSF	2108	0.0339994		PPF	2085	0.025747
SYF	2441	0.033086		VSF	2074	0.0271191		GLF	1694	0.0241914		EAF	2079	0.0335317		SYF	1914	0.0236354
GQF	2226	0.0301718		GQF	1967	0.02572		ERF	1452	0.0207355		QLF	1913	0.0308543		ERF	1812	0.0223758
_YF	2119	0.0287215		ERF	1667	0.0217972		RSF	1386	0.019793		PPF	1353	0.0218222		_YF	1637	0.0202148
VSF	1834	0.0248586		GLF	1482	0.0193782		EIF	1351	0.0192931		VSF	1225	0.0197577		E_F	1453	0.0179426
ERF	1748	0.0236929		YAF	1481	0.0193652		_SF	1313	0.0187505		_YF	1147	0.0184997		YAF	1177	0.0145344
RGF	1729	0.0234354		SYF	1455	0.0190252		LLF	1223	0.0174652		E_F	952	0.0153546		GLF	1017	0.0125586
LLF	1537	0.0208329		LLF	1249	0.0163316		LSF	989	0.0141235		SYF	898	0.0144836		LLF	871	0.0107557
LSF	1522	0.0206296		LSF	1231	0.0160962		YAF	983	0.0140379		CTF	867	0.0139836		VYF	865	0.0106816
GLF	1489	0.0201823		GYF	1127	0.0147364		KVF	857	0.0122385		YAF	833	0.0134353		EIF	854	0.0105458
SLF	1374	0.0186236		VYF	872	0.011402		E_F	774	0.0110532		HYF	749	0.0120804		VVF	851	0.0105087
_SF	1224	0.0165904		E_F	816	0.0106698		HYF	631	0.00901108		HTF	668	0.010774		HTF	822	0.0101506
YAF	1164	0.0157772		HTF	698	0.00912686		HTF	619	0.00883971		L_F	559	0.00901598		LSF	792	0.00978016
E_F	1141	0.0154654		RSF	663	0.00866921		VYF	564	0.00805428		RIF	526	0.00848373		GSF	772	0.00953318
HTF	985	0.013351		_SF	657	0.00859076		VVF	546	0.00779722		Q_F	511	0.0082418		CTF	736	0.00908863
GAF	924	0.0125242		HYF	616	0.00805465		L_F	417	0.00595502		SPF	502	0.00809664		KQF	734	0.00906393
PPF	898	0.0121717		KVF	612	0.00800235		CTF	411	0.00586934		KQF	479	0.00772568		DVF	698	0.00861938
CTF	871	0.0118058		KQF	596	0.00779314		KQF	406	0.00579794		KLF	462	0.00745149		AVF	690	0.00852059
HYF	642	0.00870185		L_F	564	0.00737471		GSF	383	0.00546948		R_F	442	0.00712892		_SF	585	0.00722398
L_F	586	0.00794281		DVF	550	0.00719165		DVF	359	0.00512675		LDF	438	0.0070644		HYF	564	0.00696466
VYF	573	0.0077666		CTF	533	0.00696937		EGF	340	0.00485541		RVF	413	0.00666118		L_F	481	0.00593971
EIF	512	0.00693979		NTF	464	0.00606714		GAF	301	0.00429847		EPF	373	0.00601603		VCF	479	0.00591502
SPF	511	0.00692624		PPF	433	0.00566179		AVF	294	0.0041985		SLF	343	0.00553217		EDF	431	0.00532228
QQF	510	0.00691268		EIF	414	0.00541335		NTF	282	0.00402714		QDF	342	0.00551604		RSF	421	0.00519879
KQF	509	0.00689913		MYF	409	0.00534797		QRF	273	0.00389861		KVF	323	0.00520959		NTF	346	0.00427264
EGF	455	0.0061672		GCF	376	0.00491648		LDF	267	0.00381293		GSF	307	0.00495153		EGF	345	0.00426029
NTF	400	0.00542171		EPF	351	0.00458958		Q_F	252	0.00359872		VVF	285	0.0045967		EPF	341	0.0042109
VVF	384	0.00520484		LNF	345	0.00451113		VCF	248	0.0035416		VYF	281	0.00453218		QVF	315	0.00388983
GSF	372	0.00504219		GSF	344	0.00449805		KLF	241	0.00344163		LVF	236	0.00380639		GCF	292	0.00360582
EPF	363	0.00492021		VVF	343	0.00448498		EDF	241	0.00344163		EIF	230	0.00370962		YIF	289	0.00356877
Q_F	351	0.00475755		QRF	327	0.00427576		MYF	238	0.00339879		NTF	229	0.00369349		ASF	276	0.00340824
VGF	337	0.00456779		LDF	316	0.00413193		ELF	232	0.00331311		ILF	221	0.00356446		AQF	273	0.00337119
DVF	296	0.00401207		Q_F	309	0.0040404		QDF	221	0.00315602		_LF	206	0.00332253		SLF	246	0.00303777
AQF	296	0.00401207		QDF	279	0.00364813		EPF	212	0.00302749		DVF	191	0.0030806		LDF	239	0.00295133
AVF	294	0.00398496		AQF	229	0.00299434		SPF	205	0.00292753		IYF	175	0.00282254		QRF	236	0.00291429
YIF	290	0.00393074		EDF	224	0.00292896		KYF	202	0.00288469		ELF	170	0.00274189		Q_F	234	0.00288959
KLF	285	0.00386297		EHF	221	0.00288974		VQF	190	0.00271332		QVF	166	0.00267738		MYF	231	0.00285255
QDF	273	0.00370032		EGF	216	0.00282436		_AF	183	0.00261335		YIF	164	0.00264512		STF	225	0.00277845
TLF	270	0.00365966		KLF	200	0.00261515		RVF	181	0.00258479		STF	151	0.00243544		_VF	224	0.00276611
QRF	256	0.0034699		EYF	198	0.002589		QVF	180	0.00257051		ASF	149	0.00240319		VQF	223	0.00275376
MYF	221	0.0029955		YIF	194	0.00253669		EYF	179	0.00255623		YPF	147	0.00237093		TLF	221	0.00272906
ELF	221	0.0029955		KYF	192	0.00251054		YIF	172	0.00245627		AVF	147	0.00237093		APF	218	0.00269201
VQF	200	0.00271086		VCF	185	0.00241901		AQF	159	0.00227062		AQF	146	0.0023548		QDF	202	0.00249443
VCF	199	0.0026973		RHF	183	0.00239286		LNF	152	0.00217066		VQF	139	0.0022419		ELF	199	0.00245739
STF	196	0.00265664		STF	180	0.00235363		R_F	151	0.00215637		EHF	137	0.00220964		YPF	185	0.00228451
EDF	196	0.00265664		R_F	168	0.00219672		RHF	139	0.00198501		EGF	134	0.00216125		EYF	154	0.0019017
WYF	192	0.00260242		IYF	166	0.00217057		SLF	136	0.00194217		MYF	131	0.00211287		RVF	152	0.001877
LVF	191	0.00258887		VQF	163	0.00213134		TLF	132	0.00188504		KYF	130	0.00209674		VIF	143	0.00176586
RVF	172	0.00233134		EKF	163	0.00213134		WYF	129	0.0018422		LNF	120	0.00193545		KYF	141	0.00174116
TRF	170	0.00230423		ELF	157	0.00205289		ASF	128	0.00182792		TLF	113	0.00182255		WYF	132	0.00163003
LNF	166	0.00225001		SLF	152	0.00198751		IYF	120	0.00171368		L-F	112	0.00180642		SPF	126	0.00155593
KYF	164	0.0022229		YPF	149	0.00194828		EHF	111	0.00158515		EDF	110	0.00177417		_AF	123	0.00151889
YPF	155	0.00210091		SPF	132	0.001726		VIF	110	0.00157087		QRF	105	0.00169352		EHF	111	0.0013707
IYF	145	0.00196537		WYF	129	0.00168677		TQF	85	0.00121385		VCF	103	0.00166126		DTF	109	0.00134601
EYF	145	0.00196537		TQF	127	0.00166062		DTF	85	0.00121385		EYF	101	0.00162901		PRF	106	0.00130896
ASF	141	0.00191115		ASF	113	0.00147756		_LF	84	0.00119957		EKF	88	0.00141933		TQF	104	0.00128426
R_F	124	0.00168073		QQF	111	0.00145141		QQF	80	0.00114245		Q-F	87	0.0014032		DQF	102	0.00125957
EHF	120	0.00162651		_VF	101	0.00132065		_VF	74	0.00105677		ANF	72	0.00116127		KLF	101	0.00124722
_VF	116	0.0015723		QNF	99	0.0012945		STF	73	0.00104249		DQF	70	0.00112901		IYF	88	0.00108668
DQF	99	0.00134187		DQF	87	0.00113759		QNF	71	0.00101392		TQF	68	0.00109676		QQF	84	0.00103729
VIF	93	0.00126055		LVF	85	0.00111144		DQF	69	0.000985363		QQF	67	0.00108063		PHF	82	0.00101259
QNF	93	0.00126055		ALF	83	0.00108529		LVF	64	0.00091396		DTF	62	0.000999984		ILF	81	0.00100024
DTF	89	0.00120633		QGF	81	0.00105913		ALF	58	0.000828277		LIF	57	0.00091934		EEF	80	0.000987894
APF	83	0.00112501		DTF	81	0.00105913		TRF	55	0.000785435		QNF	56	0.000903211		_QF	75	0.000926151
_QF	82	0.00111145		VIF	76	0.000993756		RGF	55	0.000785435		_QF	56	0.000903211		GHF	75	0.000926151
_TF	81	0.0010979		PHF	68	0.00088915		EKF	53	0.000756873		YSF	53	0.000854825		R_F	73	0.000901454
_LF	80	0.00108434		_AF	67	0.000876074		PHF	52	0.000742593		WYF	49	0.00079031		ALF	72	0.000889105
_AF	78	0.00105723		SDF	60	0.000784544		ILF	52	0.000742593		_VF	49	0.00079031		TRF	69	0.000852059
ANF	77	0.00104368		_LF	60	0.000784544		YPF	45	0.000642628		EEF	49	0.00079031		EKF	66	0.000815013
YSF	72	0.000975908		EEF	57	0.000745317		_QF	44	0.000628348		YNF	47	0.000758052		LVF	63	0.000777967
PRF	67	0.000908137		_QF	50	0.000653787		ANF	43	0.000614067		_TF	45	0.000725795		LNF	61	0.00075327
EKF	64	0.000867474		TPF	49	0.000640711		APF	40	0.000571225		APF	45	0.000725795		TNF	60	0.000740921
TQF	55	0.000745486		TRF	47	0.000614559		EEF	39	0.000556945		VIF	41	0.00066128		TEF	55	0.000679177
ALF	55	0.000745486		_TF	47	0.000614559		GGF	38	0.000542664		GAF	39	0.000629022		QNF	55	0.000679177
Q-F	48	0.000650606		Q-F	47	0.000614559		TEF	37	0.000528383		PSF	38	0.000612893		AIF	53	0.00065448
L-F	45	0.000609943		YSF	44	0.000575332		YSF	35	0.000499822		RPF	34	0.000548378		_LF	52	0.000642131
EEF	45	0.000609943		ANF	44	0.000575332		_TF	34	0.000485541		GNF	32	0.000516121		YNF	48	0.000592737
PHF	44	0.000596388		L-F	42	0.000549181		VFF	30	0.000428419		KSF	31	0.000499992		ANF	48	0.000592737
GHF	44	0.000596388		_HF	42	0.000549181		QIF	30	0.000428419		SDF	30	0.000483863		GDF	47	0.000580388
YNF	42	0.00056928		QIF	40	0.000523029		Q-F	30	0.000428419		QIF	29	0.000467734		_TF	45	0.000555691
ILF	38	0.000515063		APF	40	0.000523029		_GF	28	0.000399858		_AF	29	0.000467734		QIF	45	0.000555691
QIF	35	0.0004744		RIF	34	0.000444575		KDF	24	0.000342735		ALF	28	0.000451606		TVF	39	0.000481599
TEF	32	0.000433737		GAF	34	0.000444575		L-F	23	0.000328454		PHF	27	0.000435477		YSF	34	0.000419855
SNF	32	0.000433737		TEF	32	0.000418423		GDF	23	0.000328454		LPF	20	0.000322575		V-F	31	0.000382809
SDF	32	0.000433737		ILF	30	0.000392272		YNF	21	0.000299893		GRF	20	0.000322575		PIF	31	0.000382809
RIF	30	0.000406628		PRF	29	0.000379196		WEF	19	0.000271332		TRF	19	0.000306447		ISF	31	0.000382809
GNF	30	0.000406628		QPF	28	0.000366121		SIF	19	0.000271332		RQF	19	0.000306447		TTF	30	0.00037046
LIF	29	0.000393074		YNF	26	0.000339969		RIF	19	0.000271332		ESF	19	0.000306447		SDF	28	0.000345763
VPF	27	0.000365966		LRF	25	0.000326893		QAF	19	0.000271332		TEF	18	0.000290318		ENF	27	0.000333414
KAF	26	0.000352411		GNF	25	0.000326893		_HF	19	0.000271332		PRF	18	0.000290318		TMF	26	0.000321066
NSF	25	0.000338857		VFF	20	0.000261515		DYF	19	0.000271332		Y-F	16	0.00025806		G_F	26	0.000321066
GGF	23	0.000311748		TVF	20	0.000261515		SDF	18	0.000257051		SNF	16	0.00025806		PVF	24	0.000296368
#NAME?	22	0.000298194		RCF	19	0.000248439		PRF	18	0.000257051		SAF	16	0.00025806		GRF	24	0.000296368
SSF	20	0.000271086		GHF	19	0.000248439		TNF	16	0.00022849		RCF	16	0.00025806		TGF	22	0.000271671
LRF	18	0.000243977		RAF	18	0.000235363		PSF	15	0.000214209		PCF	16	0.00025806		AAF	22	0.000271671
TVF	17	0.000230423		AGF	18	0.000235363		WVF	14	0.000199929		LEF	16	0.00025806		Q-F	19	0.000234625
GIF	17	0.000230423		SSF	15	0.000196136		WRF	14	0.000199929		_PF	15	0.000241932		RQF	17	0.000209928
DYF	16	0.000216869		SNF	15	0.000196136		YVF	13	0.000185648		#NAME?	14	0.000225803		KAF	17	0.000209928
RCF	15	0.000203314		RGF	15	0.000196136		QPF	13	0.000185648		TVF	14	0.000225803		#NAME?	16	0.000197579
PVF	15	0.000203314		PVF	15	0.000196136		GNF	13	0.000185648		QPF	14	0.000225803		NSF	15	0.00018523
LGF	15	0.000203314		#NAME?	14	0.00018306		RPF	12	0.000171368		QGF	14	0.000225803		#NAME?	14	0.000172882
FPF	14	0.00018976		VPF	14	0.00018306		SSF	11	0.000157087		LRF	14	0.000225803		VFF	14	0.000172882
VFF	13	0.000176206		LIF	14	0.00018306		PVF	11	0.000157087		RRF	13	0.000209674		RIF	13	0.000160533
RRF	13	0.000176206		ADF	14	0.00018306		GYF	11	0.000157087		KTF	13	0.000209674		VGF	12	0.000148184
PCF	13	0.000176206		WGF	13	0.000169985		TVF	10	0.000142806		GPF	12	0.000193545		SSF	12	0.000148184
ETF	13	0.000176206		QAF	13	0.000169985		LRF	10	0.000142806		PVF	11	0.000177416		IIF	12	0.000148184
PIF	12	0.000162651		E-F	13	0.000169985		LIF	10	0.000142806		TNF	10	0.000161288		GPF	12	0.000148184
LPF	12	0.000162651		DNF	13	0.000169985		GRF	10	0.000142806		SHF	10	0.000161288		DYF	12	0.000148184
RNF	11	0.000149097		AYF	13	0.000169985		GIF	10	0.000142806		VGF	9	0.000145159		GAF	11	0.000135835
PSF	11	0.000149097		GDF	12	0.000156909		DSF	10	0.000142806		VFF	9	0.000145159		Y-F	10	0.000123487
GYF	11	0.000149097		DSF	12	0.000156909		DRF	10	0.000142806		SSF	9	0.000145159		VPF	10	0.000123487
TNF	10	0.000135543		VGF	11	0.000143833		#NAME?	9	0.000128526		RHF	9	0.000145159		LGF	10	0.000123487
RPF	10	0.000135543		PIF	11	0.000143833		V-F	9	0.000128526		HSF	9	0.000145159		L-F	10	0.000123487
QAF	10	0.000135543		MLF	11	0.000143833		VPF	8	0.000114245		G_F	9	0.000145159		GGF	10	0.000123487
PNF	10	0.000135543		DYF	11	0.000143833		_PF	8	0.000114245		TYF	8	0.00012903		PCF	9	0.000111138
_PF	10	0.000135543		RQF	10	0.000130757		G_F	8	0.000114245		RGF	8	0.00012903		LRF	9	0.000111138
E-F	10	0.000135543		PNF	10	0.000130757		ESF	8	0.000114245		GGF	8	0.00012903		DRF	9	0.000111138
AYF	10	0.000135543		HHF	10	0.000130757		#NAME?	7	9.99644e-05		_CF	8	0.00012903		_CF	9	0.000111138
VTF	9	0.000121989		TNF	9	0.000117682		VDF	7	9.99644e-05		ARF	8	0.00012903		PSF	8	9.87894e-05
RHF	9	0.000121989		GRF	9	0.000117682		RQF	7	9.99644e-05		YYF	7	0.000112901		YYF	7	8.64408e-05
V-F	8	0.000108434		G_F	9	0.000117682		RCF	7	9.99644e-05		WGF	7	0.000112901		TYF	7	8.64408e-05
TYF	8	0.000108434		V-F	8	0.000104606		PIF	7	9.99644e-05		SGF	7	0.000112901		QPF	7	8.64408e-05
SCF	8	0.000108434		RNF	8	0.000104606		LGF	7	9.99644e-05		RTF	7	0.000112901		NNF	7	8.64408e-05
GPF	8	0.000108434		PSF	8	0.000104606		K_F	7	9.99644e-05		#NAME?	7	0.000112901		LIF	7	8.64408e-05
ENF	8	0.000108434		GPF	8	0.000104606		KAF	7	9.99644e-05		ISF	7	0.000112901		HSF	7	8.64408e-05
Y-F	7	9.488e-05		GIF	8	0.000104606		WWF	6	8.56838e-05		GYF	7	0.000112901		DAF	7	8.64408e-05
VNF	7	9.488e-05		DAF	8	0.000104606		TYF	6	8.56838e-05		E-F	7	0.000112901		WQF	6	7.40921e-05
TGF	7	9.488e-05		YYF	7	9.15301e-05		SAF	6	8.56838e-05		DYF	7	0.000112901		RDF	6	7.40921e-05
RTF	7	9.488e-05		SHF	7	9.15301e-05		RAF	6	8.56838e-05		V-F	6	9.67726e-05		QGF	6	7.40921e-05
RQF	7	9.488e-05		LGF	7	9.15301e-05		QTF	6	8.56838e-05		LFF	6	9.67726e-05		IVF	6	7.40921e-05
YYF	6	8.13257e-05		ESF	7	9.15301e-05		PCF	6	8.56838e-05		KRF	6	9.67726e-05		HAF	6	7.40921e-05
WGF	6	8.13257e-05		AIF	7	9.15301e-05		LPF	6	8.56838e-05		KNF	6	9.67726e-05		T_F	5	6.17434e-05
WAF	6	8.13257e-05		TYF	6	7.84544e-05		HAF	6	8.56838e-05		HHF	6	9.67726e-05		SAF	5	6.17434e-05
QPF	6	8.13257e-05		RDF	6	7.84544e-05		GPF	6	8.56838e-05		HCF	6	9.67726e-05		RCF	5	6.17434e-05
NVF	6	8.13257e-05		PCF	6	7.84544e-05		RNF	5	7.14032e-05		ENF	6	9.67726e-05		QAF	5	6.17434e-05
LWF	6	8.13257e-05		#NAME?	6	7.84544e-05		IPF	5	7.14032e-05		DRF	6	9.67726e-05		LFF	5	6.17434e-05
LQF	6	8.13257e-05		LAF	6	7.84544e-05		IIF	5	7.14032e-05		WNF	5	8.06438e-05		#NAME?	5	6.17434e-05
ISF	6	8.13257e-05		KNF	6	7.84544e-05		GTF	5	7.14032e-05		PIF	5	8.06438e-05		AYF	5	6.17434e-05
INF	6	8.13257e-05		KAF	6	7.84544e-05		DLF	5	7.14032e-05		PDF	5	8.06438e-05		YVF	4	4.93947e-05
HSF	6	8.13257e-05		IIF	6	7.84544e-05		DAF	5	7.14032e-05		K_F	5	8.06438e-05		VHF	4	4.93947e-05
VDF	5	6.77714e-05		Y-F	5	6.53787e-05		AYF	5	7.14032e-05		EWF	5	8.06438e-05		#NAME?	4	4.93947e-05
P-F	5	6.77714e-05		SVF	5	6.53787e-05		AEF	5	7.14032e-05		DIF	5	8.06438e-05		SIF	4	4.93947e-05
K_F	5	6.77714e-05		SCF	5	6.53787e-05		WQF	4	5.71225e-05		VPF	4	6.45151e-05		P_F	4	4.93947e-05
HVF	5	6.77714e-05		P_F	5	6.53787e-05		VNF	4	5.71225e-05		SVF	4	6.45151e-05		_PF	4	4.93947e-05
DSF	5	6.77714e-05		K_F	5	6.53787e-05		VHF	4	5.71225e-05		SFF	4	6.45151e-05		NPF	4	4.93947e-05
_CF	5	6.77714e-05		AAF	5	6.53787e-05		VAF	4	5.71225e-05		RAF	4	6.45151e-05		HCF	4	4.93947e-05
#NAME?	4	5.42171e-05		VHF	4	5.23029e-05		RRF	4	5.71225e-05		HAF	4	6.45151e-05		GEF	4	4.93947e-05
QTF	4	5.42171e-05		#NAME?	4	5.23029e-05		P_F	4	5.71225e-05		DSF	4	6.45151e-05		ESF	4	4.93947e-05
NYF	4	5.42171e-05		TSF	4	5.23029e-05		NYF	4	5.71225e-05		WCF	3	4.83863e-05		DSF	4	4.93947e-05
LAF	4	5.42171e-05		THF	4	5.23029e-05		KTF	4	5.71225e-05		VNF	3	4.83863e-05		DHF	4	4.93947e-05
_HF	4	5.42171e-05		#NAME?	4	5.23029e-05		GCF	4	5.71225e-05		R-F	3	4.83863e-05		CAF	4	4.93947e-05
HCF	4	5.42171e-05		SGF	4	5.23029e-05		#NAME?	4	5.71225e-05		RDF	3	4.83863e-05		ADF	4	4.93947e-05
_GF	4	5.42171e-05		R-F	4	5.23029e-05		ETF	4	5.71225e-05		#NAME?	3	4.83863e-05		WVF	3	3.7046e-05
DAF	4	5.42171e-05		QTF	4	5.23029e-05		CGF	4	5.71225e-05		NAF	3	4.83863e-05		V_F	3	3.7046e-05
ARF	4	5.42171e-05		#NAME?	4	5.23029e-05		ADF	4	5.71225e-05		LAF	3	4.83863e-05		TPF	3	3.7046e-05
VRF	3	4.06628e-05		PQF	4	5.23029e-05		YYF	3	4.28419e-05		KDF	3	4.83863e-05		TAF	3	3.7046e-05
VEF	3	4.06628e-05		_PF	4	5.23029e-05		V_F	3	4.28419e-05		H_F	3	4.83863e-05		SRF	3	3.7046e-05
TSF	3	4.06628e-05		NSF	4	5.23029e-05		TSF	3	4.28419e-05		_HF	3	4.83863e-05		SNF	3	3.7046e-05
TDF	3	4.06628e-05		LWF	4	5.23029e-05		SHF	3	4.28419e-05		GDF	3	4.83863e-05		RTF	3	3.7046e-05
SRF	3	4.06628e-05		LQF	4	5.23029e-05		SGF	3	4.28419e-05		ETF	3	4.83863e-05		RHF	3	3.7046e-05
SQF	3	4.06628e-05		LPF	4	5.23029e-05		#NAME?	3	4.28419e-05		AYF	3	4.83863e-05		PQF	3	3.7046e-05
SHF	3	4.06628e-05		KHF	4	5.23029e-05		PNF	3	4.28419e-05		AGF	3	4.83863e-05		NVF	3	3.7046e-05
SAF	3	4.06628e-05		ISF	4	5.23029e-05		NSF	3	4.28419e-05		ADF	3	4.83863e-05		LPF	3	3.7046e-05
#NAME?	3	4.06628e-05		HVF	4	5.23029e-05		LQF	3	4.28419e-05		YLF	2	3.22575e-05		KIF	3	3.7046e-05
PQF	3	4.06628e-05		ETF	4	5.23029e-05		KIF	3	4.28419e-05		WTF	2	3.22575e-05		KHF	3	3.7046e-05
PDF	3	4.06628e-05		ENF	4	5.23029e-05		HSF	3	4.28419e-05		WLF	2	3.22575e-05		K_F	3	3.7046e-05
LFF	3	4.06628e-05		DIF	4	5.23029e-05		HIF	3	4.28419e-05		VTF	2	3.22575e-05		GNF	3	3.7046e-05
LEF	3	4.06628e-05		WVF	3	3.92272e-05		E-F	3	4.28419e-05		VAF	2	3.22575e-05		EWF	3	3.7046e-05
KNF	3	4.06628e-05		VAF	3	3.92272e-05		DPF	3	4.28419e-05		TSF	2	3.22575e-05		ETF	3	3.7046e-05
KIF	3	4.06628e-05		SRF	3	3.92272e-05		DHF	3	4.28419e-05		THF	2	3.22575e-05		E-F	3	3.7046e-05
GDF	3	4.06628e-05		SIF	3	3.92272e-05		CSF	3	4.28419e-05		T_F	2	3.22575e-05		ECF	3	3.7046e-05
ESF	3	4.06628e-05		SEF	3	3.92272e-05		AGF	3	4.28419e-05		#NAME?	2	3.22575e-05		DLF	3	3.7046e-05
DLF	3	4.06628e-05		SAF	3	3.92272e-05		Y-F	2	2.85613e-05		TAF	2	3.22575e-05		CSF	3	3.7046e-05
DDF	3	4.06628e-05		NNF	3	3.92272e-05		YCF	2	2.85613e-05		SRF	2	3.22575e-05		AGF	3	3.7046e-05
YHF	2	2.71086e-05		NAF	3	3.92272e-05		WAF	2	2.85613e-05		S_F	2	3.22575e-05		VWF	2	2.46974e-05
TPF	2	2.71086e-05		LTF	3	3.92272e-05		VTF	2	2.85613e-05		REF	2	3.22575e-05		VTF	2	2.46974e-05
S_F	2	2.71086e-05		LEF	3	3.92272e-05		VGF	2	2.85613e-05		QAF	2	3.22575e-05		VRF	2	2.46974e-05
R-F	2	2.71086e-05		HSF	3	3.92272e-05		T_F	2	2.85613e-05		PQF	2	3.22575e-05		VNF	2	2.46974e-05
RAF	2	2.71086e-05		GKF	3	3.92272e-05		SVF	2	2.85613e-05		P_F	2	3.22575e-05		VAF	2	2.46974e-05
QKF	2	2.71086e-05		DRF	3	3.92272e-05		SRF	2	2.85613e-05		NYF	2	3.22575e-05		TSF	2	2.46974e-05
PGF	2	2.71086e-05		DHF	3	3.92272e-05		S_F	2	2.85613e-05		NRF	2	3.22575e-05		TKF	2	2.46974e-05
PEF	2	2.71086e-05		CIF	3	3.92272e-05		RTF	2	2.85613e-05		LQF	2	3.22575e-05		THF	2	2.46974e-05
NQF	2	2.71086e-05		_CF	3	3.92272e-05		R-F	2	2.85613e-05		HVF	2	3.22575e-05		TDF	2	2.46974e-05
_NF	2	2.71086e-05		YDF	2	2.61515e-05		REF	2	2.85613e-05		GKF	2	3.22575e-05		SHF	2	2.46974e-05
MLF	2	2.71086e-05		WHF	2	2.61515e-05		PDF	2	2.85613e-05		GIF	2	3.22575e-05		S_F	2	2.46974e-05
KRF	2	2.71086e-05		WDF	2	2.61515e-05		NVF	2	2.85613e-05		_GF	2	3.22575e-05		SCF	2	2.46974e-05
IIF	2	2.71086e-05		VWF	2	2.61515e-05		NAF	2	2.85613e-05		ECF	2	3.22575e-05		RGF	2	2.46974e-05
_IF	2	2.71086e-05		VTF	2	2.61515e-05		LKF	2	2.85613e-05		DEF	2	3.22575e-05		RAF	2	2.46974e-05
HPF	2	2.71086e-05		V_F	2	2.61515e-05		#NAME?	2	2.85613e-05		DDF	2	3.22575e-05		QTF	2	2.46974e-05
HHF	2	2.71086e-05		VDF	2	2.61515e-05		LEF	2	2.85613e-05		DAF	2	3.22575e-05		QKF	2	2.46974e-05
HAF	2	2.71086e-05		T-F	2	2.61515e-05		KSF	2	2.85613e-05		CPF	2	3.22575e-05		PTF	2	2.46974e-05
GKF	2	2.71086e-05		RRF	2	2.61515e-05		KHF	2	2.85613e-05		ACF	2	3.22575e-05		NQF	2	2.46974e-05
G_F	2	2.71086e-05		RPF	2	2.61515e-05		ISF	2	2.85613e-05		AAF	2	3.22575e-05		_NF	2	2.46974e-05
DPF	2	2.71086e-05		RFF	2	2.61515e-05		_IF	2	2.85613e-05		YVF	1	1.61288e-05		LQF	2	2.46974e-05
DKF	2	2.71086e-05		P-F	2	2.61515e-05		GHF	2	2.85613e-05		YRF	1	1.61288e-05		LEF	2	2.46974e-05
DIF	2	2.71086e-05		PDF	2	2.61515e-05		GEF	2	2.85613e-05		YGF	1	1.61288e-05		KTF	2	2.46974e-05
_DF	2	2.71086e-05		NYF	2	2.61515e-05		DIF	2	2.85613e-05		Y_F	1	1.61288e-05		KSF	2	2.46974e-05
CYF	2	2.71086e-05		NPF	2	2.61515e-05		D_F	2	2.85613e-05		YCF	1	1.61288e-05		KNF	2	2.46974e-05
AHF	2	2.71086e-05		NMF	2	2.61515e-05		_CF	2	2.85613e-05		WQF	1	1.61288e-05		KGF	2	2.46974e-05
AGF	2	2.71086e-05		MHF	2	2.61515e-05		CAF	2	2.85613e-05		VRF	1	1.61288e-05		KDF	2	2.46974e-05
ACF	2	2.71086e-05		M_F	2	2.61515e-05		ARF	2	2.85613e-05		VHF	1	1.61288e-05		ICF	2	2.46974e-05
YGF	1	1.35543e-05		KPF	2	2.61515e-05		YLF	1	1.42806e-05		VDF	1	1.61288e-05		HVF	2	2.46974e-05
YCF	1	1.35543e-05		KIF	2	2.61515e-05		YGF	1	1.42806e-05		SKF	1	1.61288e-05		HRF	2	2.46974e-05
WTF	1	1.35543e-05		IVF	2	2.61515e-05		YFF	1	1.42806e-05		SEF	1	1.61288e-05		HPF	2	2.46974e-05
WSF	1	1.35543e-05		INF	2	2.61515e-05		WSF	1	1.42806e-05		SCF	1	1.61288e-05		HNF	2	2.46974e-05
WQF	1	1.35543e-05		HPF	2	2.61515e-05		WLF	1	1.42806e-05		RWF	1	1.61288e-05		HIF	2	2.46974e-05
WLF	1	1.35543e-05		HLF	2	2.61515e-05		WHF	1	1.42806e-05		RMF	1	1.61288e-05		H_F	2	2.46974e-05
WDF	1	1.35543e-05		HCF	2	2.61515e-05		WDF	1	1.42806e-05		QWF	1	1.61288e-05		GIF	2	2.46974e-05
VWF	1	1.35543e-05		HAF	2	2.61515e-05		TTF	1	1.42806e-05		QTF	1	1.61288e-05		DPF	2	2.46974e-05
VHF	1	1.35543e-05		GTF	2	2.61515e-05		TPF	1	1.42806e-05		QKF	1	1.61288e-05		DIF	2	2.46974e-05
V_F	1	1.35543e-05		GFF	2	2.61515e-05		TIF	1	1.42806e-05		QEF	1	1.61288e-05		AEF	2	2.46974e-05
VAF	1	1.35543e-05		#NAME?	2	2.61515e-05		TGF	1	1.42806e-05		PTF	1	1.61288e-05		ACF	2	2.46974e-05
TTF	1	1.35543e-05		DPF	2	2.61515e-05		#NAME?	1	1.42806e-05		PEF	1	1.61288e-05		YQF	1	1.23487e-05
TKF	1	1.35543e-05		DLF	2	2.61515e-05		TAF	1	1.42806e-05		PAF	1	1.61288e-05		YLF	1	1.23487e-05
THF	1	1.35543e-05		D_F	2	2.61515e-05		RMF	1	1.42806e-05		NVF	1	1.61288e-05		YHF	1	1.23487e-05
TAF	1	1.35543e-05		DDF	2	2.61515e-05		RDF	1	1.42806e-05		NQF	1	1.61288e-05		YGF	1	1.23487e-05
SVF	1	1.35543e-05		CGF	2	2.61515e-05		QWF	1	1.42806e-05		NPF	1	1.61288e-05		YDF	1	1.23487e-05
SIF	1	1.35543e-05		CAF	2	2.61515e-05		QKF	1	1.42806e-05		NNF	1	1.61288e-05		WSF	1	1.23487e-05
SEF	1	1.35543e-05		ARF	2	2.61515e-05		QGF	1	1.42806e-05		NMF	1	1.61288e-05		WPF	1	1.23487e-05
_RF	1	1.35543e-05		AHF	2	2.61515e-05		QEF	1	1.42806e-05		MLF	1	1.61288e-05		WGF	1	1.23487e-05
REF	1	1.35543e-05		AEF	2	2.61515e-05		PTF	1	1.42806e-05		MHF	1	1.61288e-05		W_F	1	1.23487e-05
RDF	1	1.35543e-05		YVF	1	1.30757e-05		PQF	1	1.42806e-05		LWF	1	1.61288e-05		WDF	1	1.23487e-05
QWF	1	1.35543e-05		YQF	1	1.30757e-05		NQF	1	1.42806e-05		LTF	1	1.61288e-05		WAF	1	1.23487e-05
PTF	1	1.35543e-05		YKF	1	1.30757e-05		NNF	1	1.42806e-05		KPF	1	1.61288e-05		VEF	1	1.23487e-05
PMF	1	1.35543e-05		YGF	1	1.30757e-05		NEF	1	1.42806e-05		KIF	1	1.61288e-05		VDF	1	1.23487e-05
P_F	1	1.35543e-05		YCF	1	1.30757e-05		MQF	1	1.42806e-05		KGF	1	1.61288e-05		RRF	1	1.23487e-05
NPF	1	1.35543e-05		WWF	1	1.30757e-05		M_F	1	1.42806e-05		KAF	1	1.61288e-05		REF	1	1.23487e-05
NNF	1	1.35543e-05		WQF	1	1.30757e-05		LWF	1	1.42806e-05		INF	1	1.61288e-05		QFF	1	1.23487e-05
NLF	1	1.35543e-05		WCF	1	1.30757e-05		LTF	1	1.42806e-05		IIF	1	1.61288e-05		#NAME?	1	1.23487e-05
NCF	1	1.35543e-05		VNF	1	1.30757e-05		LFF	1	1.42806e-05		I_F	1	1.61288e-05		PMF	1	1.23487e-05
MVF	1	1.35543e-05		TTF	1	1.30757e-05		KRF	1	1.42806e-05		_IF	1	1.61288e-05		PAF	1	1.23487e-05
MDF	1	1.35543e-05		TIF	1	1.30757e-05		KPF	1	1.42806e-05		IDF	1	1.61288e-05		NYF	1	1.23487e-05
LTF	1	1.35543e-05		T_F	1	1.30757e-05		IVF	1	1.42806e-05		IAF	1	1.61288e-05		NIF	1	1.23487e-05
#NAME?	1	1.35543e-05		TDF	1	1.30757e-05		IQF	1	1.42806e-05		HPF	1	1.61288e-05		NGF	1	1.23487e-05
KSF	1	1.35543e-05		TAF	1	1.30757e-05		IGF	1	1.42806e-05		HNF	1	1.61288e-05		MQF	1	1.23487e-05
KPF	1	1.35543e-05		SQF	1	1.30757e-05		IDF	1	1.42806e-05		HLF	1	1.61288e-05		MHF	1	1.23487e-05
KGF	1	1.35543e-05		S-F	1	1.30757e-05		HHF	1	1.42806e-05		HGF	1	1.61288e-05		M_F	1	1.23487e-05
KEF	1	1.35543e-05		_RF	1	1.30757e-05		HFF	1	1.42806e-05		HFF	1	1.61288e-05		LTF	1	1.23487e-05
KDF	1	1.35543e-05		REF	1	1.30757e-05		FSF	1	1.42806e-05		GTF	1	1.61288e-05		LAF	1	1.23487e-05
KCF	1	1.35543e-05		QKF	1	1.30757e-05		EWF	1	1.42806e-05		GHF	1	1.61288e-05		KKF	1	1.23487e-05
IVF	1	1.35543e-05		QEF	1	1.30757e-05		ECF	1	1.42806e-05		GEF	1	1.61288e-05		KCF	1	1.23487e-05
IGF	1	1.35543e-05		PTF	1	1.30757e-05		DNF	1	1.42806e-05		GCF	1	1.61288e-05		INF	1	1.23487e-05
I_F	1	1.35543e-05		PGF	1	1.30757e-05		DKF	1	1.42806e-05		FYF	1	1.61288e-05		I_F	1	1.23487e-05
HNF	1	1.35543e-05		NVF	1	1.30757e-05		DGF	1	1.42806e-05		FLF	1	1.61288e-05		IEF	1	1.23487e-05
HLF	1	1.35543e-05		NLF	1	1.30757e-05		DEF	1	1.42806e-05		FFF	1	1.61288e-05		HLF	1	1.23487e-05
HIF	1	1.35543e-05		_NF	1	1.30757e-05		CIF	1	1.42806e-05		_FF	1	1.61288e-05		HHF	1	1.23487e-05
HGF	1	1.35543e-05		MEF	1	1.30757e-05		AIF	1	1.42806e-05		#NAME?	1	1.61288e-05		_HF	1	1.23487e-05
H_F	1	1.35543e-05		KTF	1	1.30757e-05		AHF	1	1.42806e-05		DLF	1	1.61288e-05		HDF	1	1.23487e-05
HDF	1	1.35543e-05		KRF	1	1.30757e-05		A_F	1	1.42806e-05		DHF	1	1.61288e-05		GTF	1	1.23487e-05
GMF	1	1.35543e-05		KKF	1	1.30757e-05		ACF	1	1.42806e-05		DGF	1	1.61288e-05		GKF	1	1.23487e-05
GEF	1	1.35543e-05		KEF	1	1.30757e-05		AAF	1	1.42806e-05		CSF	1	1.61288e-05		FTF	1	1.23487e-05
GCF	1	1.35543e-05		I_F	1	1.30757e-05						CLF	1	1.61288e-05		#NAME?	1	1.23487e-05
FIF	1	1.35543e-05		HNF	1	1.30757e-05						CGF	1	1.61288e-05		EFF	1	1.23487e-05
_FF	1	1.35543e-05		H_F	1	1.30757e-05						#NAME?	1	1.61288e-05		DNF	1	1.23487e-05
FDF	1	1.35543e-05		G-F	1	1.30757e-05						CDF	1	1.61288e-05		DGF	1	1.23487e-05
#NAME?	1	1.35543e-05		_GF	1	1.30757e-05						ATF	1	1.61288e-05		D_F	1	1.23487e-05
ECF	1	1.35543e-05		GEF	1	1.30757e-05						AKF	1	1.61288e-05		DDF	1	1.23487e-05
DNF	1	1.35543e-05		FYF	1	1.30757e-05						AFF	1	1.61288e-05		CQF	1	1.23487e-05
DHF	1	1.35543e-05		FSF	1	1.30757e-05						AEF	1	1.61288e-05		CPF	1	1.23487e-05
DGF	1	1.35543e-05		FQF	1	1.30757e-05										CLF	1	1.23487e-05
CVF	1	1.35543e-05		EWF	1	1.30757e-05										CIF	1	1.23487e-05
CQF	1	1.35543e-05		EMF	1	1.30757e-05										CGF	1	1.23487e-05
CIF	1	1.35543e-05		ECF	1	1.30757e-05										AMF	1	1.23487e-05
CAF	1	1.35543e-05		DKF	1	1.30757e-05										AHF	1	1.23487e-05
AKF	1	1.35543e-05		DGF	1	1.30757e-05
AEF	1	1.35543e-05		DEF	1	1.30757e-05
AAF	1	1.35543e-05		CYF	1	1.30757e-05
				ACF	1	1.30757e-05

## Sheet: 8 W
CCl4 group
CCl4-1				CCl4-2				CCl4-3				CCl4-4				CCl4-5
CDR3 terminal AA	Reads	Percentage(%)		CDR3 terminal AA	Reads	Percentage(%)		CDR3 terminal AA	Reads	Percentage(%)		CDR3 terminal AA	Reads	Percentage(%)		CDR3 terminal AA	Reads	Percentage(%)
QYF	2393886	36.9512		QYF	2584281	33.2577		QYF	1996222	27.9408		QYF	3056371	38.6091		EQF	2174262	27.6838
LYF	1663700	25.6803		LYF	2096592	26.9815		LYF	1731132	24.2304		LYF	1749586	22.1014		LYF	2136781	27.2065
EVF	852572	13.16		EVF	1357238	17.4666		EQF	1521260	21.2928		RLF	1221805	15.4343		QYF	1864153	23.7353
RLF	574103	8.86166		EQF	1207941	15.5453		RLF	668920	9.36276		EVF	698323	8.82145		PLF	704899	8.97512
EQF	406127	6.26884		QHF	297042	3.8227		EVF	527589	7.38457		EQF	554141	7.0001		YTF	323054	4.11328
YTF	335474	5.17826		YTF	119156	1.53344		YTF	344592	4.8232		YTF	442773	5.59326		EVF	294336	3.74763
PLF	114775	1.77163		RLF	29739	0.382718		PLF	207345	2.90217		QHF	41422	0.523257		GVF	150306	1.91377
TGF	27219	0.420143		EAF	7633	0.0982308		EYF	50025	0.700192		QVF	39743	0.502047		RLF	80788	1.02863
NPF	24337	0.375658		RYF	5597	0.072029		VVF	6859	0.0960043		GLF	34031	0.429891		PPF	18525	0.235869
RYF	8278	0.127776		PYF	5575	0.0717459		QLF	6494	0.0908954		RYF	7229	0.0913192		LHF	17656	0.224805
PYF	6094	0.094065		VLF	4745	0.0610644		QCF	6082	0.0851287		PYF	6267	0.0791669		QLF	10643	0.135512
RVF	5984	0.092367		QLF	4209	0.0541665		QSF	5987	0.083799		LHF	5844	0.0738234		PYF	9312	0.118565
QCF	4487	0.0692598		QCF	4010	0.0516056		PYF	5882	0.0823294		QCF	4799	0.0606226		KVF	9279	0.118145
LHF	4060	0.0626688		GQF	3818	0.0491347		GQF	5136	0.0718877		LLF	3397	0.042912		QSF	7674	0.0977091
GAF	4057	0.0626225		LHF	3766	0.0484655		RYF	4910	0.0687244		_YF	3057	0.0386171		RYF	5674	0.0722441
QHF	3885	0.0599676		ERF	3278	0.0421853		LHF	4047	0.0566452		VLF	2925	0.0369496		QCF	4746	0.0604284
VLF	3169	0.0489156		LCF	3245	0.0417606		QHF	3735	0.0522782		LCF	2461	0.0310882		ERF	4514	0.0574744
GLF	2699	0.0416609		QSF	3206	0.0412587		ERF	3534	0.0494648		LSF	2288	0.0289028		QHF	2823	0.0359438
EAF	2469	0.0381107		GVF	2866	0.0368832		LCF	3138	0.0439221		EAF	2192	0.0276901		LCF	2803	0.0356892
LCF	2356	0.0363664		SYF	2836	0.0364971		GLF	2854	0.039947		ERF	2047	0.0258584		E_F	2760	0.0351417
EGF	2325	0.0358879		_YF	2806	0.036111		_SF	2778	0.0388832		GQF	2008	0.0253657		_YF	2381	0.030316
_YF	2047	0.0315968		VSF	2574	0.0331254		VLF	2529	0.035398		QSF	1930	0.0243804		SYF	2017	0.0256814
EDF	1967	0.030362		E_F	1271	0.0163568		_YF	2193	0.0306951		RSF	1859	0.0234835		KQF	1665	0.0211996
GVF	1959	0.0302385		KQF	992	0.0127663		LLF	1807	0.0252923		QLF	1724	0.0217781		VLF	1550	0.0197353
_SF	1924	0.0296982		RHF	938	0.0120713		E_F	1709	0.0239206		PLF	1643	0.0207549		EPF	963	0.0122614
VSF	1889	0.029158		VYF	758	0.00975487		EAF	1567	0.021933		VSF	1465	0.0185064		EHF	941	0.0119813
LLF	1692	0.0261171		KVF	688	0.00885402		RSF	1377	0.0192736		SYF	1373	0.0173442		EAF	930	0.0118412
LSF	1552	0.0239562		EIF	621	0.00799178		GVF	1352	0.0189237		E_F	1153	0.0145651		EKF	916	0.011663
QLF	1486	0.0229374		HYF	609	0.00783736		LSF	1311	0.0183498		GVF	1119	0.0141356		VVF	870	0.0110773
SYF	1449	0.0223663		VVF	536	0.0068979		SYF	1272	0.017804		CTF	1110	0.0140219		VSF	828	0.0105425
QSF	1377	0.0212549		QRF	491	0.00631879		EIF	1251	0.01751		YAF	1083	0.0136808		LLF	792	0.0100841
RSF	1215	0.0187543		VQF	472	0.00607427		KQF	1151	0.0161104		HTF	1056	0.0133397		GQF	774	0.00985494
GQF	1111	0.017149		DVF	453	0.00582976		VSF	1018	0.0142488		HYF	1049	0.0132513		YAF	749	0.00953663
ERF	1078	0.0166396		EPF	425	0.00546942		YAF	944	0.013213		_LF	967	0.0122155		HTF	734	0.00934564
YAF	992	0.0153122		AVF	393	0.0050576		VQF	870	0.0121772		_SF	740	0.00934793		VQF	660	0.00840344
CTF	828	0.0127807		SPF	372	0.00478735		PPF	836	0.0117014		RVF	740	0.00934793		AQF	612	0.00779228
HTF	712	0.0109902		LSF	340	0.00437553		HTF	681	0.00953184		GSF	607	0.00766783		GAF	583	0.00742304
VCF	596	0.00919966		EGF	332	0.00427258		GSF	580	0.00811816		_VF	547	0.00690989		CTF	526	0.00669729
Q_F	581	0.00896812		EHF	331	0.00425971		EPF	555	0.00776824		ASF	542	0.00684673		VYF	474	0.0060352
E_F	571	0.00881377		GSF	311	0.00400233		EDF	548	0.00767026		KVF	444	0.00560876		HYF	459	0.00584421
HYF	563	0.00869028		QVF	282	0.00362912		CTF	530	0.00741832		KQF	432	0.00545717		NTF	443	0.00564049
EIF	508	0.00784132		QDF	282	0.00362912		HYF	481	0.00673248		STF	425	0.00536874		LSF	395	0.00502933
GSF	437	0.00674539		Q_F	275	0.00353903		L_F	467	0.00653652		VYF	418	0.00528032		QDF	387	0.00492747
KVF	410	0.00632862		HTF	274	0.00352617		QRF	454	0.00635456		R_F	414	0.00522979		APF	371	0.00472375
PPF	403	0.00622057		LLF	269	0.00346182		ELF	443	0.0062006		YPF	407	0.00514136		SLF	358	0.00455823
VVF	401	0.0061897		KYF	268	0.00344895		YPF	421	0.00589267		NTF	394	0.00497714		GSF	339	0.00431631
AVF	378	0.00583468		AQF	263	0.00338461		KVF	356	0.00498287		L_F	384	0.00485082		MYF	325	0.00413806
VYF	345	0.0053253		YAF	258	0.00332026		AQF	352	0.00492688		KLF	381	0.00481292		L_F	293	0.00373062
L_F	334	0.00515551		ELF	257	0.00330739		LVF	351	0.00491289		Q_F	367	0.00463607		GLF	268	0.00341231
NTF	321	0.00495485		EDF	246	0.00316583		NYF	320	0.00447899		YIF	321	0.00405498		YIF	244	0.00310673
KQF	283	0.00436829		L_F	245	0.00315296		TLF	314	0.004395		EIF	320	0.00404235		Q-F	240	0.0030558
DVF	282	0.00435286		LDF	227	0.00292131		DVF	299	0.00418505		KYF	311	0.00392866		QVF	211	0.00268655
_QF	268	0.00413676		VCF	225	0.00289557		VYF	293	0.00410107		VVF	301	0.00380233		Q_F	207	0.00263562
YIF	251	0.00387435		QQF	220	0.00283123		QVF	280	0.00391911		EPF	299	0.00377707		QQF	206	0.00262289
QDF	247	0.00381261		RVF	214	0.00275401		LDF	280	0.00391911		SLF	295	0.00372654		DQF	204	0.00259743
SPF	244	0.0037663		VIF	200	0.00257384		KLF	270	0.00377914		LDF	285	0.00360022		SPF	203	0.00258469
SLF	223	0.00344215		EYF	198	0.00254811		YIF	244	0.00341523		QDF	274	0.00346126		LDF	201	0.00255923
LDF	207	0.00319518		MYF	192	0.00247089		SLF	240	0.00335924		GAF	254	0.00320861		PRF	170	0.00216452
MYF	189	0.00291734		NTF	189	0.00243228		Q_F	240	0.00335924		EYF	251	0.00317072		EIF	164	0.00208813
QVF	188	0.00290191		ASF	189	0.00243228		RVF	232	0.00324727		EGF	245	0.00309492		TLF	163	0.00207539
EPF	186	0.00287103		ENF	178	0.00229072		EHF	232	0.00324727		AQF	243	0.00306966		RSF	154	0.0019608
R_F	183	0.00282473		_VF	175	0.00225211		MYF	226	0.00316328		QRF	228	0.00288017		YPF	143	0.00182074
KLF	178	0.00274755		CTF	175	0.00225211		_AF	218	0.00305131		LVF	223	0.00281701		_QF	143	0.00182074
TLF	168	0.00259319		_AF	174	0.00223924		QDF	198	0.00277137		LNF	210	0.00265279		PHF	141	0.00179528
ASF	167	0.00257776		_HF	166	0.00213629		AVF	191	0.00267339		MYF	208	0.00262753		EEF	137	0.00174435
_LF	164	0.00253145		WYF	152	0.00195612		KYF	187	0.00261741		DVF	198	0.0025012		LNF	129	0.00164249
ELF	162	0.00250058		PHF	152	0.00195612		R_F	184	0.00257542		ELF	188	0.00237488		RVF	127	0.00161703
QRF	154	0.00237709		_QF	131	0.00168587		SPF	175	0.00244945		VCF	174	0.00219803		ASF	125	0.00159156
KYF	144	0.00222274		DQF	104	0.0013384		EGF	163	0.00228148		WYF	158	0.00199591		KYF	123	0.0015661
EYF	144	0.00222274		IYF	100	0.00128692		DQF	155	0.00216951		TLF	155	0.00195801		_AF	117	0.0014897
PSF	133	0.00205294		YIF	98	0.00126118		_QF	149	0.00208553		SPF	153	0.00193275		STF	112	0.00142604
LVF	111	0.00171336		PLF	94	0.00120971		QQF	146	0.00204354		_AF	151	0.00190748		QRF	111	0.00141331
AQF	106	0.00163618		EEF	89	0.00114536		NTF	137	0.00191757		EDF	144	0.00181906		EYF	105	0.00133691
STF	103	0.00158987		LNF	77	0.00099093		APF	128	0.00179159		QAF	141	0.00178116		TQF	104	0.00132418
_VF	102	0.00157444		GLF	77	0.00099093		LNF	123	0.00172161		TQF	137	0.00173063		GIF	101	0.00128598
LNF	102	0.00157444		QPF	67	0.000862238		GYF	117	0.00163763		VQF	129	0.00162957		WYF	99	0.00126052
_AF	101	0.001559		QNF	63	0.000810761		IYF	115	0.00160964		ILF	125	0.00157904		_SF	84	0.00106953
QNF	94	0.00145095		QIF	58	0.000746415		YSF	114	0.00159564		DTF	121	0.00152851		AVF	84	0.00106953
DPF	92	0.00142008		DTF	53	0.000682069		_LF	113	0.00158164		RHF	117	0.00147798		VCF	83	0.0010568
WYF	81	0.00125029		EKF	46	0.000591984		PRF	92	0.00128771		AVF	115	0.00145272		DTF	82	0.00104406
YPF	79	0.00121942		TQF	44	0.000566246		ASF	91	0.00127371		QNF	107	0.00135166		ANF	78	0.000993134
GDF	78	0.00120398		_SF	44	0.000566246		WYF	88	0.00123172		EHF	94	0.00118744		DVF	71	0.000904006
AGF	78	0.00120398		TLF	41	0.000527638		GGF	88	0.00123172		QQF	91	0.00114954		QIF	67	0.000853076
DTF	76	0.00117311		TRF	40	0.000514769		EEF	84	0.00117573		_TF	90	0.00113691		IIF	67	0.000853076
VQF	71	0.00109593		TEF	40	0.000514769		PNF	81	0.00113374		IYF	80	0.00101059		QGF	63	0.000802146
IYF	67	0.00103419		ALF	33	0.000424684		EKF	81	0.00113374		PNF	79	0.000997955		QNF	60	0.000763949
RIF	65	0.00100332		STF	32	0.000411815		VCF	80	0.00111975		VIF	78	0.000985322		NVF	60	0.000763949
EHF	61	0.000941576		RSF	30	0.000386077		STF	79	0.00110575		YNF	71	0.000896896		IYF	52	0.000662089
VIF	60	0.00092614		PNF	29	0.000373207		YNF	73	0.00102177		LIF	64	0.00080847		ALF	51	0.000649357
APF	56	0.000864397		YPF	25	0.00032173		_VF	67	0.000937788		DQF	62	0.000783205		VIF	47	0.000598427
TRF	49	0.000756348		HHF	25	0.00032173		QIF	66	0.000923791		TRF	58	0.000732676		EGF	47	0.000598427
ILF	47	0.000725476		DNF	23	0.000295992		VIF	65	0.000909794		EKF	56	0.000707411		ELF	43	0.000547497
PNF	44	0.000679169		YSF	21	0.000270254		TQF	61	0.000853807		QIF	53	0.000669514		_TF	40	0.000509299
LIF	42	0.000648298		GRF	17	0.000218777		DTF	61	0.000853807		RIF	50	0.000631617		TNF	39	0.000496567
TQF	40	0.000617427		RCF	15	0.000193038		PHF	55	0.000769826		ANF	49	0.000618984		SDF	39	0.000496567
VGF	39	0.000601991		VFF	14	0.000180169		DHF	51	0.000713838		SDF	48	0.000606352		LRF	38	0.000483834
TVF	39	0.000601991		KHF	14	0.000180169		QNF	49	0.000685845		_QF	45	0.000568455		GDF	37	0.000471102
TEF	39	0.000601991		GGF	14	0.000180169		ILF	40	0.000559873		YSF	41	0.000517926		QPF	32	0.000407439
QQF	38	0.000586555		ETF	14	0.000180169		ALF	38	0.00053188		VFF	38	0.000480029		TVF	31	0.000394707
_TF	36	0.000555684		_LF	13	0.0001673		TNF	37	0.000517883		L-F	36	0.000454764		KLF	31	0.000394707
ALF	36	0.000555684		_TF	12	0.000154431		RQF	37	0.000517883		EEF	34	0.000429499		YSF	30	0.000381975
DQF	34	0.000524813		VPF	11	0.000141561		LIF	36	0.000503886		_HF	31	0.000391602		_VF	30	0.000381975
GGF	33	0.000509377		SDF	11	0.000141561		ADF	35	0.000489889		PHF	29	0.000366338		PVF	30	0.000381975
SDF	31	0.000478506		R_F	11	0.000141561		TRF	34	0.000475892		TEF	27	0.000341073		YNF	28	0.00035651
YSF	30	0.00046307		PCF	11	0.000141561		_PF	32	0.000447899		Y-F	26	0.000328441		PIF	28	0.00035651
NSF	30	0.00046307		LRF	11	0.000141561		RIF	29	0.000405908		Q-F	23	0.000290544		KAF	25	0.000318312
EKF	29	0.000447634		KLF	11	0.000141561		L-F	27	0.000377914		DGF	23	0.000290544		R_F	24	0.00030558
EEF	29	0.000447634		GAF	11	0.000141561		_TF	26	0.000363918		TNF	21	0.000265279		WVF	23	0.000292847
Q-F	27	0.000416763		DYF	11	0.000141561		DNF	26	0.000363918		PVF	19	0.000240014		VNF	23	0.000292847
SNF	26	0.000401327		TVF	10	0.000128692		Y-F	25	0.000349921		ALF	19	0.000240014		TRF	23	0.000292847
ANF	26	0.000401327		SHF	10	0.000128692		ETF	24	0.000335924		SSF	18	0.000227382		_CF	23	0.000292847
L-F	23	0.00035502		Q-F	10	0.000128692		QPF	23	0.000321927		G_F	18	0.000227382		HPF	22	0.000280115
TPF	22	0.000339585		TYF	8	0.000102954		VAF	21	0.000293933		DLF	17	0.00021475		EDF	22	0.000280115
PRF	22	0.000339585		DLF	8	0.000102954		ECF	20	0.000279937		V-F	16	0.000202117		HSF	20	0.00025465
PHF	22	0.000339585		SSF	7	9.00845e-05		AYF	19	0.00026594		QPF	16	0.000202117		E-F	18	0.000229185
INF	22	0.000339585		SLF	7	9.00845e-05		PIF	18	0.000251943		RCF	14	0.000176853		LPF	16	0.00020372
DIF	22	0.000339585		SCF	7	9.00845e-05		PCF	16	0.000223949		GNF	14	0.000176853		TEF	14	0.000178255
HPF	21	0.000324149		NSF	7	9.00845e-05		DYF	16	0.000223949		_PF	13	0.00016422		GGF	14	0.000178255
AWF	21	0.000324149		GYF	7	9.00845e-05		VFF	15	0.000209952		LRF	13	0.00016422		RCF	13	0.000165522
PVF	20	0.000308713		TDF	6	7.72153e-05		TEF	15	0.000209952		LPF	13	0.00016422		PSF	13	0.000165522
VPF	19	0.000293278		L-F	6	7.72153e-05		SSF	15	0.000209952		GYF	12	0.000151588		PCF	13	0.000165522
YNF	18	0.000277842		HVF	6	7.72153e-05		SDF	15	0.000209952		GFF	12	0.000151588		_LF	13	0.000165522
VFF	18	0.000277842		AYF	6	7.72153e-05		RCF	15	0.000209952		#NAME?	11	0.000138956		HLF	12	0.00015279
RHF	18	0.000277842		RQF	5	6.43461e-05		ESF	15	0.000209952		HSF	11	0.000138956		RQF	10	0.000127325
RAF	17	0.000262406		QAF	5	6.43461e-05		#NAME?	12	0.000167962		GRF	11	0.000138956		TYF	9	0.000114592
PCF	17	0.000262406		LVF	5	6.43461e-05		TGF	12	0.000167962		CLF	11	0.000138956		LVF	9	0.000114592
SGF	16	0.000246971		ILF	5	6.43461e-05		LFF	11	0.000153965		RQF	10	0.000126323		RHF	7	8.91274e-05
_PF	16	0.000246971		HSF	5	6.43461e-05		GRF	11	0.000153965		AYF	10	0.000126323		HIF	7	8.91274e-05
RCF	15	0.000231535		GNF	5	6.43461e-05		TPF	10	0.000139968		YYF	9	0.000113691		YYF	6	7.63949e-05
SIF	13	0.000200664		EWF	5	6.43461e-05		REF	10	0.000139968		QGF	9	0.000113691		Y-F	6	7.63949e-05
SAF	13	0.000200664		ADF	5	6.43461e-05		PVF	10	0.000139968		PPF	9	0.000113691		RKF	6	7.63949e-05
LPF	13	0.000200664		#NAME?	4	5.14769e-05		_CF	10	0.000139968		E-F	9	0.000113691		PQF	6	7.63949e-05
DSF	13	0.000200664		V_F	4	5.14769e-05		TVF	9	0.000125971		TVF	8	0.000101059		L-F	6	7.63949e-05
IGF	12	0.000185228		VDF	4	5.14769e-05		KEF	9	0.000125971		#NAME?	8	0.000101059		#NAME?	5	6.36624e-05
NLF	11	0.000169792		SVF	4	5.14769e-05		DLF	9	0.000125971		#NAME?	8	0.000101059		VRF	5	6.36624e-05
LRF	11	0.000169792		RKF	4	5.14769e-05		RHF	8	0.000111975		LAF	8	0.000101059		VDF	5	6.36624e-05
V-F	10	0.000154357		PSF	4	5.14769e-05		PDF	7	9.79778e-05		HVF	8	0.000101059		#NAME?	5	6.36624e-05
#NAME?	9	0.000138921		PDF	4	5.14769e-05		LRF	7	9.79778e-05		VPF	7	8.84264e-05		SHF	5	6.36624e-05
QIF	9	0.000138921		KAF	4	5.14769e-05		LEF	7	9.79778e-05		K_F	7	8.84264e-05		QAF	5	6.36624e-05
YYF	8	0.000123485		FCF	4	5.14769e-05		K_F	7	9.79778e-05		DYF	7	8.84264e-05		HCF	5	6.36624e-05
TNF	8	0.000123485		ECF	4	5.14769e-05		G_F	7	9.79778e-05		TYF	6	7.5794e-05		GYF	5	6.36624e-05
PIF	8	0.000123485		DIF	4	5.14769e-05		GAF	7	9.79778e-05		SIF	6	7.5794e-05		GFF	5	6.36624e-05
LTF	8	0.000123485		DAF	4	5.14769e-05		#NAME?	6	8.3981e-05		RTF	6	7.5794e-05		ARF	5	6.36624e-05
DYF	8	0.000123485		_CF	4	5.14769e-05		TYF	6	8.3981e-05		R-F	6	7.5794e-05		AHF	5	6.36624e-05
_CF	8	0.000123485		AAF	4	5.14769e-05		RDF	6	8.3981e-05		NSF	6	7.5794e-05		AAF	5	6.36624e-05
TYF	7	0.00010805		VWF	3	3.86077e-05		IVF	6	8.3981e-05		LTF	6	7.5794e-05		VPF	4	5.09299e-05
SHF	7	0.00010805		VRF	3	3.86077e-05		HSF	6	8.3981e-05		FTF	6	7.5794e-05		VGF	4	5.09299e-05
RNF	7	0.00010805		VHF	3	3.86077e-05		ENF	6	8.3981e-05		ARF	6	7.5794e-05		VFF	4	5.09299e-05
RGF	7	0.00010805		V-F	3	3.86077e-05		E-F	6	8.3981e-05		#NAME?	5	6.31617e-05		VAF	4	5.09299e-05
QPF	7	0.00010805		RTF	3	3.86077e-05		DRF	6	8.3981e-05		RKF	5	6.31617e-05		SCF	4	5.09299e-05
NAF	7	0.00010805		PVF	3	3.86077e-05		VPF	5	6.99842e-05		PSF	5	6.31617e-05		SAF	4	5.09299e-05
ESF	7	0.00010805		PQF	3	3.86077e-05		VGF	5	6.99842e-05		IIF	5	6.31617e-05		#NAME?	4	5.09299e-05
SSF	6	9.2614e-05		P_F	3	3.86077e-05		SVF	5	6.99842e-05		HHF	5	6.31617e-05		NLF	4	5.09299e-05
IIF	6	9.2614e-05		NVF	3	3.86077e-05		RPF	5	6.99842e-05		ESF	5	6.31617e-05		KIF	4	5.09299e-05
GTF	6	9.2614e-05		KRF	3	3.86077e-05		QTF	5	6.99842e-05		DSF	5	6.31617e-05		HAF	4	5.09299e-05
DLF	6	9.2614e-05		AGF	3	3.86077e-05		Q-F	5	6.99842e-05		DRF	5	6.31617e-05		GCF	4	5.09299e-05
DAF	6	9.2614e-05		YYF	2	2.57384e-05		#NAME?	5	6.99842e-05		APF	5	6.31617e-05		EWF	4	5.09299e-05
TAF	5	7.71783e-05		YNF	2	2.57384e-05		LTF	5	6.99842e-05		SHF	4	5.05293e-05		ETF	4	5.09299e-05
RTF	5	7.71783e-05		WLF	2	2.57384e-05		_HF	5	6.99842e-05		RRF	4	5.05293e-05		DPF	4	5.09299e-05
PGF	5	7.71783e-05		WDF	2	2.57384e-05		ARF	5	6.99842e-05		#NAME?	4	5.05293e-05		AYF	4	5.09299e-05
IQF	5	7.71783e-05		VTF	2	2.57384e-05		YYF	4	5.59873e-05		PTF	4	5.05293e-05		YQF	3	3.81975e-05
HSF	5	7.71783e-05		VGF	2	2.57384e-05		YGF	4	5.59873e-05		LEF	4	5.05293e-05		YLF	3	3.81975e-05
GYF	5	7.71783e-05		#NAME?	2	2.57384e-05		V-F	4	5.59873e-05		HNF	4	5.05293e-05		V_F	3	3.81975e-05
GNF	5	7.71783e-05		TPF	2	2.57384e-05		PSF	4	5.59873e-05		HCF	4	5.05293e-05		T_F	3	3.81975e-05
DRF	5	7.71783e-05		SQF	2	2.57384e-05		P_F	4	5.59873e-05		GIF	4	5.05293e-05		TDF	3	3.81975e-05
ARF	5	7.71783e-05		QEF	2	2.57384e-05		LQF	4	5.59873e-05		GHF	4	5.05293e-05		SSF	3	3.81975e-05
VAF	4	6.17427e-05		PGF	2	2.57384e-05		LGF	4	5.59873e-05		GEF	4	5.05293e-05		RPF	3	3.81975e-05
GRF	4	6.17427e-05		NQF	2	2.57384e-05		KIF	4	5.59873e-05		ETF	4	5.05293e-05		RIF	3	3.81975e-05
ETF	4	6.17427e-05		MEF	2	2.57384e-05		ISF	4	5.59873e-05		DAF	4	5.05293e-05		PTF	3	3.81975e-05
DDF	4	6.17427e-05		LTF	2	2.57384e-05		HCF	4	5.59873e-05		CPF	4	5.05293e-05		PNF	3	3.81975e-05
AFF	4	6.17427e-05		KPF	2	2.57384e-05		YQF	3	4.19905e-05		_CF	4	5.05293e-05		LTF	3	3.81975e-05
AEF	4	6.17427e-05		KCF	2	2.57384e-05		V_F	3	4.19905e-05		CAF	4	5.05293e-05		K_F	3	3.81975e-05
#NAME?	3	4.6307e-05		ISF	2	2.57384e-05		PAF	3	4.19905e-05		WMF	3	3.7897e-05		KDF	3	3.81975e-05
YDF	3	4.6307e-05		I_F	2	2.57384e-05		NSF	3	4.19905e-05		WCF	3	3.7897e-05		IVF	3	3.81975e-05
TWF	3	4.6307e-05		HNF	2	2.57384e-05		NQF	3	4.19905e-05		VNF	3	3.7897e-05		ILF	3	3.81975e-05
TKF	3	4.6307e-05		HCF	2	2.57384e-05		LPF	3	4.19905e-05		VHF	3	3.7897e-05		IKF	3	3.81975e-05
RDF	3	4.6307e-05		GTF	2	2.57384e-05		HQF	3	4.19905e-05		VGF	3	3.7897e-05		GRF	3	3.81975e-05
NRF	3	4.6307e-05		GHF	2	2.57384e-05		HLF	3	4.19905e-05		V_F	3	3.7897e-05		GKF	3	3.81975e-05
NHF	3	4.6307e-05		GEF	2	2.57384e-05		HGF	3	4.19905e-05		VDF	3	3.7897e-05		AKF	3	3.81975e-05
#NAME?	3	4.6307e-05		GCF	2	2.57384e-05		AIF	3	4.19905e-05		SCF	3	3.7897e-05		YHF	2	2.5465e-05
KRF	3	4.6307e-05		ESF	2	2.57384e-05		AEF	3	4.19905e-05		REF	3	3.7897e-05		YGF	2	2.5465e-05
HHF	3	4.6307e-05		E-F	2	2.57384e-05		ACF	3	4.19905e-05		RAF	3	3.7897e-05		WGF	2	2.5465e-05
_HF	3	4.6307e-05		DSF	2	2.57384e-05		AAF	3	4.19905e-05		NNF	3	3.7897e-05		VTF	2	2.5465e-05
GCF	3	4.6307e-05		DHF	2	2.57384e-05		YHF	2	2.79937e-05		LWF	3	3.7897e-05		#NAME?	2	2.5465e-05
E-F	3	4.6307e-05		ATF	2	2.57384e-05		VWF	2	2.79937e-05		LQF	3	3.7897e-05		TTF	2	2.5465e-05
Y-F	2	3.08713e-05		AEF	2	2.57384e-05		VRF	2	2.79937e-05		KHF	3	3.7897e-05		TIF	2	2.5465e-05
WGF	2	3.08713e-05		YVF	1	1.28692e-05		VMF	2	2.79937e-05		HPF	3	3.7897e-05		THF	2	2.5465e-05
VTF	2	3.08713e-05		YLF	1	1.28692e-05		VHF	2	2.79937e-05		HGF	3	3.7897e-05		SRF	2	2.5465e-05
VDF	2	3.08713e-05		YHF	1	1.28692e-05		TTF	2	2.79937e-05		GTF	3	3.7897e-05		QTF	2	2.5465e-05
SVF	2	3.08713e-05		YGF	1	1.28692e-05		TIF	2	2.79937e-05		GCF	3	3.7897e-05		QEF	2	2.5465e-05
SRF	2	3.08713e-05		YDF	1	1.28692e-05		TAF	2	2.79937e-05		ECF	3	3.7897e-05		P_F	2	2.5465e-05
SCF	2	3.08713e-05		YCF	1	1.28692e-05		SRF	2	2.79937e-05		ADF	3	3.7897e-05		PDF	2	2.5465e-05
RPF	2	3.08713e-05		WQF	1	1.28692e-05		SQF	2	2.79937e-05		YQF	2	2.52647e-05		NRF	2	2.5465e-05
R-F	2	3.08713e-05		WHF	1	1.28692e-05		SHF	2	2.79937e-05		YLF	2	2.52647e-05		NQF	2	2.5465e-05
_RF	2	3.08713e-05		WGF	1	1.28692e-05		SCF	2	2.79937e-05		YHF	2	2.52647e-05		LIF	2	2.5465e-05
#NAME?	2	3.08713e-05		W_F	1	1.28692e-05		RTF	2	2.79937e-05		YDF	2	2.52647e-05		LGF	2	2.5465e-05
PDF	2	3.08713e-05		_WF	1	1.28692e-05		RGF	2	2.79937e-05		WQF	2	2.52647e-05		#NAME?	2	2.5465e-05
NYF	2	3.08713e-05		VEF	1	1.28692e-05		R-F	2	2.79937e-05		WPF	2	2.52647e-05		KPF	2	2.5465e-05
LQF	2	3.08713e-05		VAF	1	1.28692e-05		RAF	2	2.79937e-05		WKF	2	2.52647e-05		KKF	2	2.5465e-05
LGF	2	3.08713e-05		TTF	1	1.28692e-05		QGF	2	2.79937e-05		VTF	2	2.52647e-05		ISF	2	2.5465e-05
LEF	2	3.08713e-05		TSF	1	1.28692e-05		QAF	2	2.79937e-05		VAF	2	2.52647e-05		_HF	2	2.5465e-05
KPF	2	3.08713e-05		TNF	1	1.28692e-05		PTF	2	2.79937e-05		TGF	2	2.52647e-05		G_F	2	2.5465e-05
KGF	2	3.08713e-05		TGF	1	1.28692e-05		PQF	2	2.79937e-05		SVF	2	2.52647e-05		ENF	2	2.5465e-05
KCF	2	3.08713e-05		TAF	1	1.28692e-05		PGF	2	2.79937e-05		S_F	2	2.52647e-05		DSF	2	2.5465e-05
KAF	2	3.08713e-05		SRF	1	1.28692e-05		NVF	2	2.79937e-05		SAF	2	2.52647e-05		DLF	2	2.5465e-05
IVF	2	3.08713e-05		SIF	1	1.28692e-05		KTF	2	2.79937e-05		RWF	2	2.52647e-05		CAF	2	2.5465e-05
ISF	2	3.08713e-05		SGF	1	1.28692e-05		KRF	2	2.79937e-05		RPF	2	2.52647e-05		YVF	1	1.27325e-05
HCF	2	3.08713e-05		S_F	1	1.28692e-05		KKF	2	2.79937e-05		RGF	2	2.52647e-05		YDF	1	1.27325e-05
GIF	2	3.08713e-05		RIF	1	1.28692e-05		KCF	2	2.79937e-05		QWF	2	2.52647e-05		WQF	1	1.27325e-05
GHF	2	3.08713e-05		RDF	1	1.28692e-05		HPF	2	2.79937e-05		PQF	2	2.52647e-05		WPF	1	1.27325e-05
ENF	2	3.08713e-05		QTF	1	1.28692e-05		HIF	2	2.79937e-05		PIF	2	2.52647e-05		VHF	1	1.27325e-05
DNF	2	3.08713e-05		QGF	1	1.28692e-05		HHF	2	2.79937e-05		PGF	2	2.52647e-05		VEF	1	1.27325e-05
AYF	2	3.08713e-05		PRF	1	1.28692e-05		GTF	2	2.79937e-05		PDF	2	2.52647e-05		TSF	1	1.27325e-05
AHF	2	3.08713e-05		PPF	1	1.28692e-05		GCF	2	2.79937e-05		PCF	2	2.52647e-05		SVF	1	1.27325e-05
ADF	2	3.08713e-05		PEF	1	1.28692e-05		EWF	2	2.79937e-05		NVF	2	2.52647e-05		RWF	1	1.27325e-05
ACF	2	3.08713e-05		NYF	1	1.28692e-05		DPF	2	2.79937e-05		NRF	2	2.52647e-05		RRF	1	1.27325e-05
AAF	2	3.08713e-05		NPF	1	1.28692e-05		DKF	2	2.79937e-05		NQF	2	2.52647e-05		RGF	1	1.27325e-05
YVF	1	1.54357e-05		NLF	1	1.28692e-05		DGF	2	2.79937e-05		NAF	2	2.52647e-05		QMF	1	1.27325e-05
YLF	1	1.54357e-05		NIF	1	1.28692e-05		_DF	2	2.79937e-05		MCF	2	2.52647e-05		QKF	1	1.27325e-05
WQF	1	1.54357e-05		NHF	1	1.28692e-05		DAF	2	2.79937e-05		LGF	2	2.52647e-05		P-F	1	1.27325e-05
WHF	1	1.54357e-05		MSF	1	1.28692e-05		CSF	2	2.79937e-05		LFF	2	2.52647e-05		NYF	1	1.27325e-05
W_F	1	1.54357e-05		M_F	1	1.28692e-05		CAF	2	2.79937e-05		KRF	2	2.52647e-05		NNF	1	1.27325e-05
VWF	1	1.54357e-05		LPF	1	1.28692e-05		AGF	2	2.79937e-05		KCF	2	2.52647e-05		NDF	1	1.27325e-05
VRF	1	1.54357e-05		LIF	1	1.28692e-05		YVF	1	1.39968e-05		IQF	2	2.52647e-05		MNF	1	1.27325e-05
VNF	1	1.54357e-05		LGF	1	1.28692e-05		YLF	1	1.39968e-05		I_F	2	2.52647e-05		M_F	1	1.27325e-05
VHF	1	1.54357e-05		LEF	1	1.28692e-05		WRF	1	1.39968e-05		IDF	2	2.52647e-05		LWF	1	1.27325e-05
V_F	1	1.54357e-05		LAF	1	1.28692e-05		WQF	1	1.39968e-05		GGF	2	2.52647e-05		LQF	1	1.27325e-05
VEF	1	1.54357e-05		KSF	1	1.28692e-05		WLF	1	1.39968e-05		FHF	2	2.52647e-05		KTF	1	1.27325e-05
TTF	1	1.54357e-05		KGF	1	1.28692e-05		VDF	1	1.39968e-05		#NAME?	2	2.52647e-05		KSF	1	1.27325e-05
TSF	1	1.54357e-05		KEF	1	1.28692e-05		TKF	1	1.39968e-05		__F	2	2.52647e-05		KHF	1	1.27325e-05
TMF	1	1.54357e-05		IVF	1	1.28692e-05		THF	1	1.39968e-05		DPF	2	2.52647e-05		IPF	1	1.27325e-05
S_F	1	1.54357e-05		IIF	1	1.28692e-05		#NAME?	1	1.39968e-05		DNF	2	2.52647e-05		I_F	1	1.27325e-05
RWF	1	1.54357e-05		_IF	1	1.28692e-05		TDF	1	1.39968e-05		DHF	2	2.52647e-05		_IF	1	1.27325e-05
RRF	1	1.54357e-05		ICF	1	1.28692e-05		SKF	1	1.39968e-05		DCF	2	2.52647e-05		HVF	1	1.27325e-05
RQF	1	1.54357e-05		HPF	1	1.28692e-05		SIF	1	1.39968e-05		AGF	2	2.52647e-05		HNF	1	1.27325e-05
REF	1	1.54357e-05		HLF	1	1.28692e-05		SGF	1	1.39968e-05		A_F	2	2.52647e-05		HHF	1	1.27325e-05
QWF	1	1.54357e-05		HDF	1	1.28692e-05		S_F	1	1.39968e-05		AEF	2	2.52647e-05		HGF	1	1.27325e-05
QTF	1	1.54357e-05		GIF	1	1.28692e-05		RRF	1	1.39968e-05		YVF	1	1.26323e-05		HDF	1	1.27325e-05
QKF	1	1.54357e-05		G_F	1	1.28692e-05		RMF	1	1.39968e-05		YKF	1	1.26323e-05		GTF	1	1.27325e-05
QGF	1	1.54357e-05		GDF	1	1.28692e-05		RKF	1	1.39968e-05		YGF	1	1.26323e-05		GPF	1	1.27325e-05
QEF	1	1.54357e-05		FLF	1	1.28692e-05		QKF	1	1.39968e-05		Y_F	1	1.26323e-05		GEF	1	1.27325e-05
PTF	1	1.54357e-05		FFF	1	1.28692e-05		QFF	1	1.39968e-05		WVF	1	1.26323e-05		FYF	1	1.27325e-05
PQF	1	1.54357e-05		#NAME?	1	1.28692e-05		P-F	1	1.39968e-05		WTF	1	1.26323e-05		FNF	1	1.27325e-05
P_F	1	1.54357e-05		__F	1	1.28692e-05		NRF	1	1.39968e-05		WSF	1	1.26323e-05		#NAME?	1	1.27325e-05
#NAME?	1	1.54357e-05		DRF	1	1.28692e-05		NPF	1	1.39968e-05		W_F	1	1.26323e-05		ESF	1	1.27325e-05
PAF	1	1.54357e-05		D_F	1	1.28692e-05		_NF	1	1.39968e-05		WDF	1	1.26323e-05		ECF	1	1.27325e-05
NKF	1	1.54357e-05		DEF	1	1.28692e-05		NAF	1	1.39968e-05		VRF	1	1.26323e-05		DHF	1	1.27325e-05
NGF	1	1.54357e-05		CSF	1	1.28692e-05		MVF	1	1.39968e-05		TPF	1	1.26323e-05		DGF	1	1.27325e-05
NCF	1	1.54357e-05		CDF	1	1.28692e-05		MPF	1	1.39968e-05		TIF	1	1.26323e-05		_DF	1	1.27325e-05
MLF	1	1.54357e-05		CAF	1	1.28692e-05		MNF	1	1.39968e-05		TAF	1	1.26323e-05		DAF	1	1.27325e-05
MGF	1	1.54357e-05		APF	1	1.28692e-05		MHF	1	1.39968e-05		SWF	1	1.26323e-05		CVF	1	1.27325e-05
LWF	1	1.54357e-05		ANF	1	1.28692e-05		MFF	1	1.39968e-05		SRF	1	1.26323e-05		ATF	1	1.27325e-05
LMF	1	1.54357e-05		AHF	1	1.28692e-05		LWF	1	1.39968e-05		SQF	1	1.26323e-05
LFF	1	1.54357e-05		A_F	1	1.28692e-05		LKF	1	1.39968e-05		RNF	1	1.26323e-05
KTF	1	1.54357e-05		ACF	1	1.28692e-05		#NAME?	1	1.39968e-05		_RF	1	1.26323e-05
KSF	1	1.54357e-05						LAF	1	1.39968e-05		RDF	1	1.26323e-05
KNF	1	1.54357e-05						KPF	1	1.39968e-05		PMF	1	1.26323e-05
KIF	1	1.54357e-05						KHF	1	1.39968e-05		PFF	1	1.26323e-05
K_F	1	1.54357e-05						KFF	1	1.39968e-05		PAF	1	1.26323e-05
ITF	1	1.54357e-05						INF	1	1.39968e-05		NLF	1	1.26323e-05
IRF	1	1.54357e-05						IHF	1	1.39968e-05		N_F	1	1.26323e-05
IFF	1	1.54357e-05						I_F	1	1.39968e-05		NDF	1	1.26323e-05
I_F	1	1.54357e-05						_IF	1	1.39968e-05		MVF	1	1.26323e-05
ICF	1	1.54357e-05						ICF	1	1.39968e-05		MRF	1	1.26323e-05
HVF	1	1.54357e-05						HNF	1	1.39968e-05		KTF	1	1.26323e-05
H_F	1	1.54357e-05						H_F	1	1.39968e-05		KPF	1	1.26323e-05
HDF	1	1.54357e-05						HAF	1	1.39968e-05		KIF	1	1.26323e-05
HAF	1	1.54357e-05						GNF	1	1.39968e-05		KGF	1	1.26323e-05
GPF	1	1.54357e-05						GKF	1	1.39968e-05		K-F	1	1.26323e-05
GKF	1	1.54357e-05						GIF	1	1.39968e-05		KDF	1	1.26323e-05
G_F	1	1.54357e-05						GHF	1	1.39968e-05		KAF	1	1.26323e-05
FSF	1	1.54357e-05						GEF	1	1.39968e-05		IVF	1	1.26323e-05
__F	1	1.54357e-05						GDF	1	1.39968e-05		ITF	1	1.26323e-05
EWF	1	1.54357e-05						_FF	1	1.39968e-05		ISF	1	1.26323e-05
ECF	1	1.54357e-05						#NAME?	1	1.39968e-05		_IF	1	1.26323e-05
DGF	1	1.54357e-05						EFF	1	1.39968e-05		HRF	1	1.26323e-05
DCF	1	1.54357e-05						DSF	1	1.39968e-05		H-F	1	1.26323e-05
CYF	1	1.54357e-05						DIF	1	1.39968e-05		GWF	1	1.26323e-05
CPF	1	1.54357e-05						D_F	1	1.39968e-05		GKF	1	1.26323e-05
CNF	1	1.54357e-05						DEF	1	1.39968e-05		FYF	1	1.26323e-05
CHF	1	1.54357e-05						DDF	1	1.39968e-05		FPF	1	1.26323e-05
AKF	1	1.54357e-05						CVF	1	1.39968e-05		F_F	1	1.26323e-05
AIF	1	1.54357e-05						CPF	1	1.39968e-05		FCF	1	1.26323e-05
								CGF	1	1.39968e-05		ENF	1	1.26323e-05
								AHF	1	1.39968e-05		DIF	1	1.26323e-05
								A_F	1	1.39968e-05		_DF	1	1.26323e-05
												DDF	1	1.26323e-05
												CSF	1	1.26323e-05
												CIF	1	1.26323e-05
												ATF	1	1.26323e-05
												AHF	1	1.26323e-05
