# Supplementary material for: The T Cell Receptor Immune Repertoire Protects the Liver From Reconsitution
Source: Front Immunol. 2020 Dec 18;11:584979. doi: 10.3389/fimmu.2020.584979 (PMC7775400; doi:10.3389/fimmu.2020.584979)
Supplement: Supplementary file 15 [file Table_14.xlsx]

## Sheet: cluster median
	1	2	3	4	5	6	7	8	9	10	11	12	13	14	15	16	17	18	19	20
CD69	2.07791	3.80129	3.88423	4.2795	3.38774	3.74577	4.78559	2.46022	3.61628	3.73508	3.08162	8.46036	4.26994	3.76514	2.59464	3.92676	3.50625	3.6027	1.82997	3.56815
CD45	4.96986	5.06887	4.35667	5.36664	4.31711	4.43696	4.239	2.58404	4.29419	4.20353	4.33832	4.08755	3.84611	4.37859	4.65227	4.19533	4.7437	4.58998	4.82552	4.97109
CD44	4.5567	6.5256	3.80753	4.73185	4.11194	6.03953	5.14342	3.00671	6.36044	6.21093	5.10661	3.0564	4.9762	6.40866	5.30389	5.78219	3.63912	5.77576	5.06024	4.26928
CD38	3.81524	3.6159	3.63622	3.74409	6.59056	2.85069	2.93182	2.33756	1.59071	3.12286	2.13038	1.71507	1.99728	1.6092	2.18148	2.5005	1.45097	2.94388	1.68487	2.49338
B220	3.30398	2.91282	3.01188	3.17631	2.78239	1.07215	1.15038	0.936817	0.300218	2.06149	0.489491	0.348462	0.706424	0.322119	0.300569	2.02564	0.595716	0.514578	0.466885	0.672954
MHC_II	5.24047	5.16575	4.98395	5.13097	2.46378	4.97259	1.35676	3.14289	0.656021	2.91985	0.674092	3.89376	1.94022	1.55091	0.767173	2.18452	0.375855	1.36833	0.744036	0.860043
CD8a	0.969451	0.410109	0.0333612	4.21899	0.00262761	0.00292558	0.000712465	0.00152691	0.0014651	1.3661	0.00291218	0.0011037	0.00153111	0.00177384	0.00194075	1.68775	0.746057	0.731026	4.43759	4.75154
TCRb	0.135949	0.00188065	0.00131011	3.01998	0.00293231	0.0009577	0.000448357	0.00071292	0.000420324	0.000841989	0.000901356	0.000601664	0.000256547	0.00039278	0.000826813	0.594187	3.57873	2.19909	2.17004	2.91877
CD4	0.0013401	0.00191554	0.000654508	1.08881	0.000862315	0.00090301	0.000549187	0.000481407	0.000680793	3.34205	0.000453315	0.863156	0.00356045	0.00130444	0.000279912	1.71887	4.3275	3.91319	0.000521491	0.0012061
TCRgd	0.000810539	0.00315434	0.000723589	0.00102577	0.00115571	0.00208922	0.113614	0.00128636	0.000891939	0.000528068	0.000926844	0.000607866	0.747096	0.00213496	3.22412	2.46912	0.000478568	0.297011	0.000563789	0.000552567
GITR	0.322542	0.672632	0.207142	1.50546	0.324181	0.336489	1.61712	0.00115607	0.130646	0.226903	1.49801	3.03689	3.06845	0.642327	1.229	1.48014	1.1165	4.37995	0.65877	1.15291
CD127	0.00174169	0.457329	0.224722	0.863764	0.374941	0.308546	1.37138	0.00174257	0.326334	0.208333	0.124975	4.44188	3.75771	0.520896	0.640541	1.87798	0.729092	1.27884	0.225369	0.269573
CD11c	0.00111744	0.932984	0.199526	0.294777	4.54883	1.78705	2.13506	0.0184481	0.718886	1.70852	1.79193	3.30686	4.1448	1.24411	0.00330938	2.04547	0.00115596	0.217176	0.00123978	0.00233001
CTLA_4	0.00115758	3.36219	0.00169329	0.129718	0.159021	0.061216	0.0843563	0.000828252	0.0040649	0.035209	0.00126657	0.264091	1.9301	3.3174	0.00171767	2.45537	0.00295419	0.705277	0.00127457	0.00142264
Foxp3	0.140462	3.7039	0.356843	0.29659	0.702129	0.365463	1.26576	0.00298188	0.152073	0.107858	0.151513	0.450508	3.97745	3.72366	0.130351	3.11382	0.00192332	3.55058	0.0319788	0.00310192
SLAM	0.905876	0.665673	0.672748	1.60021	0.239217	0.0925592	0.00216841	0.00223838	0.00158651	0.0021151	0.00109535	0.000976995	0.00330237	0.0136794	0.0702974	0.411294	0.509235	1.93863	0.606982	1.47957
CD86	0.297416	0.256879	0.0647112	1.27476	0.003024	0.49524	0.420385	0.00419946	0.061287	0.00423206	0.00326877	0.000895898	0.00278604	0.0102453	0.587257	1.85372	0.0351893	0.428688	0.852664	2.02985
CD3e	0.00365369	0.0719934	0.000687622	1.79609	0.270068	0.00130761	0.00204792	0.000738846	0.000801014	0.00200904	0.00077335	0.00117337	0.418192	0.00237101	0.854774	1.50435	2.29094	1.32718	0.646462	1.19271
CD25	0.00021002	0.376697	0.00144973	0.00130312	0.00248373	0.00322662	0.199315	0.0007303	0.00395925	0.0013825	0.000763094	0.537879	2.59627	0.247272	0.000587218	2.52091	0.0008822	0.661807	0.000233699	0.000457107
CD160	0.00129306	0.242131	0.00140636	0.212529	0.00182054	0.00194893	0.13118	0.00106428	0.00123857	0.00245024	0.00497741	0.00184835	0.139203	0.00400053	0.00345349	2.17303	0.0135394	0.00218342	0.00125573	0.00175407
LAG3	0.000452484	0.00166095	0.000410318	0.00200009	0.00092414	0.000556603	0.0010419	0.000299677	0.000234902	0.00435269	0.000901266	0.000307129	0.0004839	0.000851545	0.000470925	2.22917	0.000253671	0.00116228	0.00071228	0.0046089
TIM3	0.001749	0.337948	0.00137008	0.373209	0.00174552	0.00411189	0.261127	0.000809999	0.0011112	0.000928917	0.395192	0.433999	0.509049	0.184777	0.0687947	2.28977	0.00127475	0.00198143	0.172974	0.678525
cKIT	0.000579931	0.000737724	0.000255893	0.000727646	0.000539153	0.000888219	0.00107004	0.000299595	0.000250382	0.000192221	0.00102831	0.000314541	0.000736846	0.000245421	0.000544486	0.207693	0.000214005	0.000268629	0.000684547	0.000936478
ICOS	0.000381629	0.000958626	0.000388445	0.00155856	6.49687	0.000462413	0.00058372	0.000291206	0.000375989	0.000355969	0.000374053	0.000388449	0.00208077	0.000610509	0.000845902	0.757837	0.00073949	0.339278	0.000600313	0.000693354
NK1.1	0.000701238	0.00106255	0.000264397	0.00111982	0.000652015	0.000160456	0.651557	0.000182007	0.00011358	0.000171163	1.5139	0.000244913	0.00109578	0.000336239	0.000942236	1.05386	0.00022159	0.000223904	0.000736181	0.00131459
KLRG1	0.873049	0.886745	0.227016	1.34804	0.0434489	0.402315	0.227969	0.130671	0.0658999	0.227658	0.558274	0.00201852	0.00280747	0.155891	0.166809	0.43974	0.435428	2.53223	0.625272	0.51588
CD14	0.00427761	0.705665	0.15202	0.0535476	2.26483	1.34477	1.1227	0.0291583	1.21839	0.502259	0.0141947	0.00154757	3.67123	0.780015	0.124096	2.20238	0.000935036	0.10947	0.00160341	0.00135609
TGFb	0.00143151	0.81838	0.00211192	0.059432	0.0228896	0.896832	0.148492	0.45084	0.710468	0.0819004	0.0144861	0.000811013	0.69776	0.757636	0.00248127	2.57125	0.000896994	0.00353024	0.00104431	0.00149237
CD80	0.180305	1.05215	0.00133927	0.0423252	0.00241505	1.2784	0.132263	0.00381342	0.991625	0.705298	0.114251	0.000386686	0.00231148	0.958562	0.231563	2.20982	0.00103183	0.696646	0.059429	0.00235077
Tbet	1.33403	3.66546	1.1829	2.69434	1.13982	1.53966	3.86855	0.352834	0.833305	1.35243	4.16894	4.869	1.35867	3.59362	3.24019	2.92832	1.01483	1.324	3.36915	2.93097
Gr_1	0.24298	1.54154	1.38051	1.51647	1.37801	1.62488	2.61265	0.623633	2.47209	1.18503	0.637756	2.58633	4.08572	1.60871	0.66081	2.29184	0.796417	0.827276	0.0620593	0.802825
CD11b	0.803751	4.44687	1.501	2.0249	1.55262	3.63385	2.57499	1.03084	4.17162	1.55024	2.14363	1.4348	3.22037	4.43413	0.549402	3.78473	1.5928	1.46407	0.265864	1.11338
BTLA	2.31429	3.64311	2.0764	2.3451	1.27069	1.31126	0.517933	0.349888	0.318282	0.725483	0.342441	0.157371	0.411561	3.42396	0.495239	2.69173	0.819654	0.44794	0.959692	0.961831
Bcl_6	1.13732	2.92617	0.945029	1.47851	0.475434	1.24685	0.571516	0.0141642	0.887317	1.02476	0.635172	0.123247	0.731678	2.79294	0.486064	2.2266	0.582962	0.488634	0.6073	0.550465
PD_L1	1.65097	1.72688	1.38244	1.94088	6.74663	1.4093	1.13759	0.477423	0.274965	0.601756	0.917591	0.102548	0.757792	0.310181	1.16091	1.97904	0.820307	0.605961	0.758714	0.921821
PD_1	0.669186	1.52815	1.43252	2.01997	6.53115	1.11211	1.92353	0.587375	0.81476	0.888071	0.783482	1.80264	1.23999	1.20081	1.01843	2.18012	0.872607	1.75456	0.534588	1.67098
CD62L	2.49989	2.50296	2.40885	2.84964	1.17451	0.891055	2.04808	0.366895	1.09666	0.505891	2.43357	0.342343	4.04939	0.699768	0.512512	2.24036	1.53027	0.217203	3.36105	0.674974
F4_80	0.118133	2.1053	1.73168	1.93188	1.22315	1.87963	2.8309	0.868526	1.67631	1.46462	0.858067	5.74717	3.72569	2.15293	0.50838	2.51105	1.18556	1.2198	0.0057705	1.2402

## Sheet: cell type median
	B cells	CD4 T	CD8 T	DCs	ILCs	Macrophages	Neutrophils	NK cells	NKT	γδ T
CD69	3.76706	3.51991	3.59194	3.38774	8.46036	4.72252	3.65815	3.08162	3.92676	2.69397
CD45	4.29037	4.72076	5.00128	4.31711	4.08755	4.26034	4.33239	4.33832	4.19533	4.61636
CD44	3.77949	3.84909	4.35543	4.11194	3.0564	5.22291	6.38424	5.10661	5.78219	5.28837
CD38	3.56338	1.61021	2.69119	6.59056	1.71507	2.9236	1.61723	2.13038	2.5005	2.16649
B220	2.91484	0.581668	0.796652	2.78239	0.348462	1.14691	0.321434	0.489491	2.02564	0.318861
MHC_II	4.851	0.525176	1.05011	2.46378	3.89376	1.56386	0.962521	0.674092	2.18452	0.81423
CD8a	0.00644756	0.742252	4.71006	0.00262761	0.0011037	0.000861127	0.00159636	0.00291218	1.68775	0.00185552
TCRb	0.0012251	3.42302	2.90329	0.00293231	0.000601664	0.000511611	0.000425206	0.000901356	0.594187	0.000804797
CD4	0.000698815	4.27886	0.00153756	0.000862315	0.863156	0.000597825	0.000870519	0.000453315	1.71887	0.000427794
TCRgd	0.00077434	0.000799535	0.000601001	0.00115571	0.000607866	0.0748762	0.00121469	0.000926844	2.46912	3.1327
GITR	0.1454	1.28763	1.17128	0.324181	3.03689	1.46367	0.292518	1.49801	1.48014	1.38902
CD127	0.159552	0.821447	0.331037	0.374941	4.44188	1.27304	0.395473	0.124975	1.87798	0.750225
CD11c	0.188068	0.00153142	0.00270239	4.54883	3.30686	2.10555	0.901981	1.79193	2.04547	0.048637
CTLA_4	0.00157931	0.027921	0.00167109	0.159021	0.264091	0.0810522	0.331236	0.00126657	2.45537	0.00239337
Foxp3	0.283896	0.00452705	0.00540283	0.702129	0.450508	1.1532	0.639358	0.151513	3.11382	0.194256
SLAM	0.560473	0.657284	1.44945	0.239217	0.000976995	0.00243507	0.00214973	0.00109535	0.411294	0.0584128
CD86	0.0558871	0.0831135	1.90553	0.003024	0.000895898	0.431322	0.0466253	0.00326877	1.85372	0.488831
CD3e	0.000713003	2.17895	1.22512	0.270068	0.00117337	0.0019131	0.00119496	0.00077335	1.50435	0.828392
CD25	0.00134072	0.00128688	0.000513904	0.00248373	0.537879	0.166559	0.0762956	0.000763094	2.52091	0.000902979
CD160	0.00137409	0.00451325	0.0020862	0.00182054	0.00184835	0.0927553	0.001703	0.00497741	2.17303	0.00391622
LAG3	0.000418165	0.000340103	0.00317881	0.00092414	0.000307129	0.000982087	0.000434103	0.000901266	2.22917	0.000476224
TIM3	0.00128597	0.00135849	0.561072	0.00174552	0.433999	0.220624	0.00220871	0.395192	2.28977	0.0947472
cKIT	0.000260786	0.000220345	0.000904552	0.000539153	0.000314541	0.00103258	0.000255075	0.00102831	0.207693	0.000563292
ICOS	0.00037837	0.00112771	0.000757782	6.49687	0.000388449	0.000566912	0.000452292	0.000374053	0.757837	0.000943371
NK1.1	0.000250858	0.00022159	0.00126404	0.000652015	0.000244913	0.339584	0.000189422	1.5139	1.05386	0.000952166
KLRG1	0.217891	0.545651	0.606148	0.0434489	0.00201852	0.25425	0.10362	0.558274	0.43974	0.149814
CD14	0.143263	0.00123141	0.00156619	2.26483	0.00154757	1.14718	1.04207	0.0141947	2.20238	0.196145
TGFb	0.00256633	0.00104922	0.00162934	0.0228896	0.000811013	0.199629	0.726821	0.0144861	2.57125	0.00330433
CD80	0.00158825	0.00167188	0.00265462	0.00241505	0.000386686	0.211318	0.983208	0.114251	2.20982	0.18701
Tbet	1.10308	1.06238	2.9336	1.13982	4.869	3.67746	1.37259	4.16894	2.92832	3.07415
Gr_1	1.2653	0.801887	0.841999	1.37801	2.58633	2.56017	1.9482	0.637756	2.29184	0.753871
CD11b	1.43909	1.57597	1.156	1.55262	1.4348	2.62896	4.28257	2.14363	3.78473	0.66486
BTLA	1.9678	0.761107	1.0626	1.27069	0.157371	0.582104	0.79962	0.342441	2.69173	0.489749
Bcl_6	0.857314	0.564023	0.638762	0.475434	0.123247	0.635561	1.44174	0.635172	2.2266	0.498376
PD_L1	1.30281	0.787997	1.01057	6.74663	0.102548	1.16219	0.301239	0.917591	1.97904	1.13028
PD_1	1.31003	0.987044	1.66911	6.53115	1.80264	1.84654	0.948978	0.783482	2.18012	1.03924
CD62L	2.19276	1.13677	0.921956	1.17451	0.342343	1.91717	0.938812	2.43357	2.24036	0.72952
F4_80	1.60319	1.19013	1.26623	1.22315	5.74717	2.76102	1.84922	0.858067	2.51105	0.611397
